# Supplementary material for: Predatory myxobacteria lay at the cross-roads of metallo-β-lactamase evolution
Source: Research Square preprint supplement (doi:10.21203/rs.3.rs-7386923/v1), 2025-09-15
Supplement: Supplementary file 1 [file 580539812045b361be47e320.xlsx]

## Sheet: B1_whole_proteins_positives_met
1.Hit_code	2.Assembly	3.Strain_taxid	4.Species_taxid	5.Species_name	6.Taxonomic_lineage	7.Genome_size	8.Contig_containing_hit	9.Beta-lactamase_class	10.HMMER_score	11.Strand	12.Hit_start_nt	13.Hit_end_nt	14.CDS_start	15.CDS_end	16.CDS_sequence	17.Protein_ID	18.Annotation	19.Protein_sequence	20.ORF_check	21.Hit_check	22.Aligned_profile	23.Aligned_query	24.HMM_from	25.HMM_to	26.HMM_coverage	27.Insertions	28.Deletions	29.Stops	30.Protein_size	31.CDS_cluster	32.Known_family?	33.Protein_cluster	34.Gram_negative_SP	35.Gram_negative_cleavage	36.Gram_positive_SP	37.Gram_positive_cleavage	38.H116xHxD	39.H196xxxx	40.C221	41.H263	42.comment
B1_1	GCF_002836795.1	2058298	2058298	Shewanella_sp_11B5	Bacteria-Pseudomonadota-Gammaproteobacteria-Alteromonadales-Shewanellaceae-Shewanella-unclassified_Shewanella-	4252947	NZ_PJAP01000656.1	class_B1	256.4	+	693	1389	628	1413	ATGTTTTCACGAATATTGATATTACTAATTGGTTTTATTTGCTGTGTGCCACTTGCGATAAGCGCTGAGTCATCAGGCCAACTGACTATCACACCGCTCAGTAGCAATGCTTTGGTTAAAGCGAATCAAGCTCAAGCAACACAAATCCAACTATTTGAATATCAGTCTTATTTTAAAACTGAAGACTTTGGTTTGGTCGATGCTAATGGCCTAGTGGTTGTTGAAGGTAAAGATGCGTATTTAATCGATACCCCATGGAGCGAGAAAGACACTATTGCGTTAGTCGAGTGGATAAAGCAGCAAAACTTTATACTCAAAGCCAGTATTTCAACCCATTCACATGCCGACCGCACGGCTGGAATAAGTTACCTAAACAGTATTGGTGTTAGCACTCACGTA…	WP_102037248.1	subclass_B1_metallo-beta-lactamase	MFSRILILLIGFICCVPLAISAESSGQLTITPLSSNALVKANQAQATQIQLFEYQSYFKTEDFGLVDANGLVVVEGKDAYLIDTPWSEKDTIALVEWIKQQNFILKASISTHSHADRTAGISYLNSIGVSTHVSVMTQKILTTQHKALASQPFDGDSFTLANGLLEARYLGAGHTIDNIVVWLPKAQLLFGGCLVKSAHSKSMGYIAEASLTDWPVTISKVKATFSDAEVVVPGHGAIGNAELLNHTQELVNVYLSKHQLD	ORF_OK	TRUE_HIT	a.........eekeeeekdelkiekladnvyvhtsykevegvgkvssngLvvidekevvlvDtpwteeqtekLldwiekklklkvkavistHfHeDrlGGlealnkkgiktyasalTnellkkegkeqakhsfkkeekltlgkekievfypGegHtkDNiVvwlpkekiLfGGClvksaeakslGnlgdAnveeWpksvekvkakypeakiVipGHgevgdkellehTlklleka	AessgqltitPLSSNALVKANQAQATQIQLFEYQSYFKTEDFGLVDANGLVVVEGKDAYLIDTPWSEKDTIALVEWIKQ-QNFILKASISTHSHADRTAGISYLNSIGVSTHVSVMTQKILTTQHKALASQPFDGDSF-TLANGLLEARYLGAGHTIDNIVVWLPKAQLLFGGCLVKSAHSKSMGYIAEASLTDWPVTISKVKATFSDAEVVVPGHGAIGNAELLNHTQELVNVY	24	249	88.9328	9	2	0	261	Cluster_256	CLUSTER_NOT_IN_NCBI_AMR_REF_DB	Cluster_260	SP_Sec_SPI_	21-22	SP_Sec_SPI_	22-23	H_x_H_x_D	H_x_x_D_N	C	H	.
B1_10	GCF_002844125.1	492670	492670	Bacillus_velezensis	Bacteria-Terrabacteria_group-Bacillota-Bacilli-Bacillales-Bacillaceae-Bacillus-Bacillus_subtilis_group-Bacillus_amyloliquefaciens_group-	4246605	NZ_CP025308.1	class_B1	227.9	+	1162951	1163656	1162913	1163662	TTGAGAAAGCTTTCATTATTAATTGCGGGGTTATTTCTATTCGGCCTCTTTACTGCCGGAATGAAACCGGCACATGCGGCGGATGGCTCCGCAGCAAAAGATGTCACTCTCACACAGCTGGCGCCGCATGTCTGGATGCATACAAGCATCGGTACGGCAGACGGAAGTCCCGTCCCTGCGAACGGATTGCTTCTTGAGACTTCCAAAGGAATCGTACTGATTGATACTCCGTGGAATGACAGTCTCACAGAGCAATTAATGACACAAATAAAAAAGCGGTTTCCCGGAAAAAGGATGACCGATGCCATTGTGACACACGCCCATGATGATCGTATCGGCGGTCTGAACACCCTGTACAAATACGGTGTAAAGGTGCACAGCACGAAACTGACCGCCGAC…	WP_014417441.1	subclass_B1_metallo-beta-lactamase	MRKLSLLIAGLFLFGLFTAGMKPAHAADGSAAKDVTLTQLAPHVWMHTSIGTADGSPVPANGLLLETSKGIVLIDTPWNDSLTEQLMTQIKKRFPGKRMTDAIVTHAHDDRIGGLNTLYKYGVKVHSTKLTADFARQQGYDRPLGDLKNVTKLQFGDMKIETFYPGKGHTEDNMTVWLPEDKLLFGGCLIKALETKEIVPTPGFYPDQWPRAVRKVMKRYQDISIVVPGHGSPGDDRLLPHTISLLKET	ORF_OK	TRUE_HIT	lllllllslaaaeekeeeekdelkiekladnvyvhtsykevegvgkvssngLvvidekevvlvDtpwteeqtekLldwiekkl.klkvkavistHfHeDrlGGlealnkkgiktyasalTnellkkegkeqakhsfkkeekltlgkekievfypGegHtkDNiVvwlpkekiLfGGClvksaeakslGnlgdAnveeWpksvekvkakypeakiVipGHgevgdkellehTlkllek	LFGLFTAGMKPAHAADGSAAKDVTLTQLAPHVWMHTSIGTADGS-PVPANGLLLETSKGIVLIDTPWNDSLTEQLMTQIKKRFpGKRMTDAIVTHAHDDRIGGLNTLYKYGVKVHSTKLTADFARQQGYDRPLGDLKNVTKLQFGDMKIETFYPGKGHTEDNMTVWLPEDKLLFGGCLIKALETKEIVPTPGFYPDQWPRAVRKVMKRYQDISIVVPGHGSPGDDRLLPHTISLLKE	13	248	92.8854	1	1	0	249	Cluster_210	CLUSTER_NOT_IN_NCBI_AMR_REF_DB	Cluster_216	SP_Sec_SPI_	26-27	SP_Sec_SPI_	26-27	H_x_H_x_D	H_x_x_D_N	C	H	.
B1_100	GCF_002896665.1	1392	1392	Bacillus_anthracis	Bacteria-Terrabacteria_group-Bacillota-Bacilli-Bacillales-Bacillaceae-Bacillus-Bacillus_cereus_group-	5479113	NZ_PPER01000065.1	class_B1	285	-	243	960	241	1011	ATGAAAAATACATTATTAAAATTAGGGGTATGTGTTAGTTTACTAGGAATAACTCCATTTGTTAGTACAATTTCTTCTGTACAAGCAGAACGAAAGGTAGAGCATAAAGTAATAAAAAATGAGACAGGAACTATTTCAATTTCTCAGTTAAACAAAAATGTTTGGGTTCATACGGAGTTAGGTTATTTTAACGGAGAAGCAGTTCCTTCGAACGGTTTAATCCTTAATACTTCTAAAGGATTAGTACTTGTCGATTCTTCTTGGGATGATAAGTTAACGAAGGAATTAATAGAGATGGCAGAAAAGAAATTTAAGAAGAGTGTAACGGATGTTATTATTACACATGCACACGCTGATCGGATTGGTGGAATAAAAACGTTGAAAGAAAGAGGCATTAAA…	WP_000799223.1	BcII_family_subclass_B1_metallo-beta-lactamase	MKNTLLKLGVCVSLLGITPFVSTISSVQAERKVEHKVIKNETGTISISQLNKNVWVHTELGYFNGEAVPSNGLILNTSKGLVLVDSSWDDKLTKELIEMAEKKFKKSVTDVIITHAHADRIGGIKTLKERGIKAHSTTLTAELAKKNGYEEPLGDLQAITKLKFGNMKVETFYPGKGHTEDNIVVWLPQYNMLVGGCLVKSASAKDLGNITDAYVNEWSTSIENVLKRYENINFVVPGHGEVGDKGLLLHTLDLLK	ORF_OK	TRUE_HIT	lllllslaaa........eekeeeekdelkiekladnvyvhtsykevegvgkvssngLvvidekevvlvDtpwteeqtekLldwiekklklkvkavistHfHeDrlGGlealnkkgiktyasalTnellkkegkeqakhsfkkeekltlgkekievfypGegHtkDNiVvwlpkekiLfGGClvksaeakslGnlgdAnveeWpksvekvkakypeakiVipGHgevgdkellehTlklle	ITPFVSTISSvqaerkveHKVIKNETGTISISQLNKNVWVHTELGYFNGE-AVPSNGLILNTSKGLVLVDSSWDDKLTKELIEMAEKKFKKSVTDVIITHAHADRIGGIKTLKERGIKAHSTTLTAELAKKNGYEEPLGDLQAITKLKFGNMKVETFYPGKGHTEDNIVVWLPQYNMLVGGCLVKSASAKDLGNITDAYVNEWSTSIENVLKRYENINFVVPGHGEVGDKGLLLHTLDLLK	15	247	91.6996	8	1	0	256	Cluster_137	BcII_family_subclass_B1_metallo-beta-lactamase_NG_047224.1_cds_WP_012261328.1_1	Cluster_139	SP_Sec_SPI_	29-30	SP_Sec_SPI_	29-30	H_x_H_x_D	H_x_x_D_N	C	H	.
B1_101	GCF_002896695.1	1392	1392	Bacillus_anthracis	Bacteria-Terrabacteria_group-Bacillota-Bacilli-Bacillales-Bacillaceae-Bacillus-Bacillus_cereus_group-	5460030	NZ_PPES01000021.1	class_B1	278.6	+	36618	37332	36565	37335	ATGAAAAATACATTATTAAAATTAGGGGTATGTGTTAGTTTACTAGGAATAACTCCATTTGTTAGTACAATTTCTTCTGTACAAGCAGAACGAAAGGTAGAGCATAAAGTAATAAAAAATGAGACAGGAACTATTTCAATTTCTCAGTTAAACAAAAATGTTTGGGTTCATACGGAGTTAGGTTATTTTAACGGAGAAGCAGTTCCTTCGAACGGTTTAATCCTTAATACTTCTAAAGGATTAGTACTTGTCGATTCTTCTTGGGATGATAAGTTAACGAAGGAATTAATAGAGATGGCAGAAAAGAAATTTAAGAAGAGTGTAACGGATGTTATTATTACACATGCACACGCTGATCGGATTGGTGGAATAAAAACGTTGAAAGAAAGAGGCATTAAA…	WP_000799223.1	BcII_family_subclass_B1_metallo-beta-lactamase	MKNTLLKLGVCVSLLGITPFVSTISSVQAERKVEHKVIKNETGTISISQLNKNVWVHTELGYFNGEAVPSNGLILNTSKGLVLVDSSWDDKLTKELIEMAEKKFKKSVTDVIITHAHADRIGGIKTLKERGIKAHSTTLTAELAKKNGYEEPLGDLQAITKLKFGNMKVETFYPGKGHTEDNIVVWLPQYNMLVGGCLVKSASAKDLGNITDAYVNEWSTSIENVLKRYENINFVVPGHGEVGDKGLLLHTLDLLK	ORF_OK	TRUE_HIT	llllslaaa........eekeeeekdelkiekladnvyvhtsykevegvgkvssngLvvidekevvlvDtpwteeqtekLldwiekklklkvkavistHfHeDrlGGlealnkkgiktyasalTnellkkegkeqakhsfkkeekltlgkekievfypGegHtkDNiVvwlpkekiLfGGClvksaeakslGnlgdAnveeWpksvekvkakypeakiVipGHgevgdkellehTlklle	TPFVSTISSvqaerkveHKVIKNETGTISISQLNKNVWVHTELGYFNGE-AVPSNGLILNTSKGLVLVDSSWDDKLTKELIEMAEKKFKKSVTDVIITHAHADRIGGIKTLKERGIKAHSTTLTAELAKKNGYEEPLGDLQAITKLKFGNMKVETFYPGKGHTEDNIVVWLPQYNMLVGGCLVKSASAKDLGNITDAYVNEWSTSIENVLKRYENINFVVPGHGEVGDKGLLLHTLDLLK	16	247	91.3043	8	1	0	256	Cluster_137	BcII_family_subclass_B1_metallo-beta-lactamase_NG_047224.1_cds_WP_012261328.1_1	Cluster_139	SP_Sec_SPI_	29-30	SP_Sec_SPI_	29-30	H_x_H_x_D	H_x_x_D_N	C	H	.
B1_102	GCF_002897415.1	573	573	Klebsiella_pneumoniae	Bacteria-Pseudomonadota-Gammaproteobacteria-Enterobacterales-Enterobacteriaceae-Klebsiella_Raoultella_group-Klebsiella-	5871712	NZ_BFAI01000114.1	class_B1	271.4	+	321	1089	286	1098	ATGGAATTGCCCAATATTATGCACCCGGTCGCGAAGCTGAGCACCGCATTAGCCGCTGCATTGATGCTGAGCGGGTGCATGCCCGGTGAAATCCGCCCGACGATTGGCCAGCAAATGGAAACTGGCGACCAACGGTTTGGCGATCTGGTTTTCCGCCAGCTCGCACCGAATGTCTGGCAGCACACTTCCTATCTCGACATGCCGGGTTTCGGGGCAGTCGCTTCCAACGGTTTGATCGTCAGGGATGGCGGCCGCGTGCTGGTGGTCGATACCGCCTGGACCGATGACCAGACCGCCCAGATCCTCAACTGGATCAAGCAGGAGATCAACCTGCCGGTCGCGCTGGCGGTGGTGACTCACGCGCATCAGGACAAGATGGGCGGTATGGACGCGCTGCAT…	WP_063860861.1	subclass_B1_metallo-beta-lactamase_NDM-4	MELPNIMHPVAKLSTALAAALMLSGCMPGEIRPTIGQQMETGDQRFGDLVFRQLAPNVWQHTSYLDMPGFGAVASNGLIVRDGGRVLVVDTAWTDDQTAQILNWIKQEINLPVALAVVTHAHQDKMGGMDALHAAGIATYANALSNQLAPQEGLVAAQHSLTFAANGWVEPATAPNFGPLKVFYPGPGHTSDNITVGIDGTDIAFGGCLIKDSKAKSLGNLGDADTEHYAASARAFGAAFPKASMIVMSHSAPDSRAAITHTARMADKLR	ORF_OK	TRUE_HIT	kllllllllllllslaaa.........eekeeeekdelkiekladnvyvhtsykevegvgkvssngLvvidekevvlvDtpwteeqtekLldwiekklklkvkavistHfHeDrlGGlealnkkgiktyasalTnellkkegkeqakhsfkkeek......ltlgkekievfypGegHtkDNiVvwlpkekiLfGGClvksaeakslGnlgdAnveeWpksvekvkakypeakiVipGHgevgdkellehTlkllek	KLSTALAAALMLSGCMPGeirptigqqMETGDQRFGDLVFRQLAPNVWQHTSYLDMPGFGAVASNGLIVRDGGRVLVVDTAWTDDQTAQILNWIKQEINLPVALAVVTHAHQDKMGGMDALHAAGIATYANALSNQLAPQEGLVAAQHSLTFAANgwvepaTAPNFGPLKVFYPGPGHTSDNITVGIDGTDIAFGGCLIKDSKAKSLGNLGDADTEHYAASARAFGAAFPKASMIVMSHSAPDSRAAITHTARMADK	7	248	95.2569	15	0	0	270	Cluster_118	subclass_B1_metallo-beta-lactamase_NDM-18_NG_052866.1_cds_WP_077064890.1_1	Cluster_120	LIPO_Sec_SPII_	25-26	LIPO_Sec_SPII_	25-26	H_x_H_x_D	H_x_x_D_N	C	H	.
B1_103	GCF_002899825.2	475075	475075	Chryseobacterium_phosphatilyticum	Bacteria-FCB_group-Bacteroidota_Chlorobiota_group-Bacteroidota-Flavobacteriia-Flavobacteriales-Weeksellaceae-Chryseobacterium_group-Chryseobacterium-	5235650	NZ_PPED02000001.1	class_B1	268.5	+	585890	586604	585891	586610	ATGAAAAAAAGTATTCAGCTTTTGATGATGTCGATGTTTCTAAGCCCATTGATGAATGCCCAGGTAAAAGACTTTGTCATTGAGCCACCCATTAGCTCTAATCTCCATATTTATAAAAGTTTCGGAGTGTTTGGAGGTAAAGAATATTCGGCCAATGCCGTATATCTGACTACCAAAAAAGGAGTTGTTTTATTTGATGTTCCCTGGCAAAAGGAACAATACCAGACTTTGATAGATACGATACAAAAACGTCATCATCTTCCTGTAATTGCCGTATTTGCAACCCACTCACACGATGACAGAGCCGGAGATTTAAGTTTTTACAACAATAAAGGAATTAAAACTTATGCTACTGCCAGAACCAATGAGTTACTGAAAAAAGACGGAAAAACAACTTCC…	WP_109710273.1	IND_family_subclass_B1_metallo-beta-lactamase	MKKSIQLLMMSMFLSPLMNAQVKDFVIEPPISSNLHIYKSFGVFGGKEYSANAVYLTTKKGVVLFDVPWQKEQYQTLIDTIQKRHHLPVIAVFATHSHDDRAGDLSFYNNKGIKTYATARTNELLKKDGKTTSTEVIKTGKPYKIGGEEFIVDFLGEGHTVDNVVVWFPKYKVLDGGCLVKSRTATDLGFTGEANVKQWPQTMEKLKTKYSQATLIIPGHDEWKGGGHVERTVELLNKK	ORF_OK	TRUE_HIT	klrkllllllllllllslaaaeekeeeekdelkiekladnvyvhtsykevegvgkvssngLvvidekevvlvDtpwteeqtekLldwiekklklkvkavistHfHeDrlGGlealnkkgiktyasalTnellkkegkeqakhsfkkeekltlgkekievfypGegHtkDNiVvwlpkekiLfGGClvksaeakslGnlgdAnveeWpksvekvkakypeakiVipGHgevgdkellehTlkllek	IMKKSIQ-LLMMSMFLSPL----MNAQVKDFVIEPPISSNLHIYKSFGVFGGK-EYSANAVYLTTKKGVVLFDVPWQKEQYQTLIDTIQKRHHLPVIAVFATHSHDDRAGDLSFYNNKGIKTYATARTNELLKKDGKTTSTEVIKTGKPYKIGGEEFIVDFLGEGHTVDNVVVWFPKYKVLDGGCLVKSRTATDLGFTGEANVKQWPQTMEKLKTKYSQATLIIPGHDEWKGGGHVERTVELLNK	4	248	96.4427	0	6	0	239	Cluster_930	subclass_B1_metallo-beta-lactamase_IND-11_NG_049226.1_cds_WP_063860622.1_1	Cluster_755	SP_Sec_SPI_	20-21	SP_Sec_SPI_	20-21	H_x_H_x_D	H_x_x_D_N	C	H	.
B1_104	GCF_002899825.2	475075	475075	Chryseobacterium_phosphatilyticum	Bacteria-FCB_group-Bacteroidota_Chlorobiota_group-Bacteroidota-Flavobacteriia-Flavobacteriales-Weeksellaceae-Chryseobacterium_group-Chryseobacterium-	5235650	NZ_PPED02000002.1	class_B1	266.1	+	712334	713054	712308	713060	ATGAAGTTCCTCTCTAAAATAGTATTGTTTTCCTTATTCTTATTTTTTTTAAACTGTAATACTAAAAAAGCATCACACCTGCCCAAGATCGTTTATAAAACAGATGAACTTTCTGTTATTCAGCTATCTGATCATGTTTATCAGCATATTTCTTATTTGAATACAGATTCTTTTGGGAGAGTACCCTGTAATGGTATGATTGTTAAACAAGATGGTGAAGTTGTGATTTTAGATACTCCTGCGAATGATAAAAGCTCGGAAGAGCTGATTCTGTGGATTAAAAATAATTTGAATTCTAATATTAATGCAGTTGTAGCAACCCACTTTCATAATGATTGCTTAGGAGGCTTAAAAGAGTTTGATAAAAATAAAATTCCTTCCTATGGTAGCGTTAGAACC…	WP_109711995.1	CIM_family_subclass_B1_metallo-beta-lactamase	MKFLSKIVLFSLFLFFLNCNTKKASHLPKIVYKTDELSVIQLSDHVYQHISYLNTDSFGRVPCNGMIVKQDGEVVILDTPANDKSSEELILWIKNNLNSNINAVVATHFHNDCLGGLKEFDKNKIPSYGSVRTIDLAKKNNENIPQHSFDNDLTLKVGRTNVFVKYFGEGHTKDNVVAYFPDERILFGGCLIKENGATKGYLGDANIQAWSGTVTKIKKQYPDVWIVIPGHGDAGGMKLLDYTINLFKNN	ORF_OK	TRUE_HIT	kllllllllllllslaaaeekeeeekdelkiekladnvyvhtsykevegvgkvssngLvvidekevvlvDtpwteeqtekLldwiekklklkvkavistHfHeDrlGGlealnkkgiktyasalTnellkkegkeqakhsfkkeekltlgkekievfypGegHtkDNiVvwlpkekiLfGGClvksaeakslGnlgdAnveeWpksvekvkakypeakiVipGHgevgdkellehTlkllek	LFSLFLFFLNCNTKKASHLPKIVYKTDELSVIQLSDHVYQHISYLNTDSFGRVPCNGMIVKQDGEVVILDTPANDKSSEELILWIKNNLNSNINAVVATHFHNDCLGGLKEFDKNKIPSYGSVRTIDLAKKNNENIPQHSFDNDLTLKVGRTNVFVKYFGEGHTKDNVVAYFPDERILFGGCLIKENGA-TKGYLGDANIQAWSGTVTKIKKQYPDVWIVIPGHGDAGGMKLLDYTINLFKN	7	248	95.2569	0	1	0	250	Cluster_532	CLUSTER_NOT_IN_NCBI_AMR_REF_DB	Cluster_490	LIPO_Sec_SPII_	18-19	LIPO_Sec_SPII_	18-19	H_x_H_x_D	H_x_x_D_N	C	H	.
B1_105	GCF_002899875.1	1241981	1241981	Chryseobacterium_lactis	Bacteria-FCB_group-Bacteroidota_Chlorobiota_group-Bacteroidota-Flavobacteriia-Flavobacteriales-Weeksellaceae-Chryseobacterium_group-Chryseobacterium-	5593731	NZ_PPEH01000005.1	class_B1	270.1	-	190609	191317	190595	191326	ATGAAAAAAAGTATTCAGCTTTTGATGATGTCGATGTTTTTAAGCCCATTGATGAATGCTCAGATAAAGGATTTTGTCATCGAACCCCCGATTAAACCCAACTTATATATTTACAAAAGTTTTGGAGTATTTGGAGGAAGAGAATATTCTGCTAATGCAGCCTACCTCATCACCAAAAAAGGAGTGGTTTTATTTGATGTTCCATGGCCGAAAGAACAGTATCAAACCTTAATGGATACAATAAAAAAGCGTCATAACTTACCTGTTATTGCTGTATTTGCAACACATTCACATGATGACAGAGCCGGAGATTTAAGCTTTTACAATAATAAAGGGATTAAAACGTTCGCTACAGCAAAAACGAATGAGCTACTTAAGAAAGACGGAAAAGCAACTTCC…	WP_103292343.1	IND_family_subclass_B1_metallo-beta-lactamase	MKKSIQLLMMSMFLSPLMNAQIKDFVIEPPIKPNLYIYKSFGVFGGREYSANAAYLITKKGVVLFDVPWPKEQYQTLMDTIKKRHNLPVIAVFATHSHDDRAGDLSFYNNKGIKTFATAKTNELLKKDGKATSTDIIKVGKPYKIGGEEFVVDFLGEGHTVDNVVVWFPKYKVLDGGCLVKSRTATDLGFTGEANVAQWPQTMEKLKSKYSQATLIIPGHDEWKGGGHVEHTLDLLNKNPKGN	ORF_OK	TRUE_HIT	kllllllllllllslaaaeekeeeekdelkiekladnvyvhtsykevegvgkvssngLvvidekevvlvDtpwteeqtekLldwiekklklkvkavistHfHeDrlGGlealnkkgiktyasalTnellkkegkeqakhsfkkeekltlgkekievfypGegHtkDNiVvwlpkekiLfGGClvksaeakslGnlgdAnveeWpksvekvkakypeakiVipGHgevgdkellehTlklleka	KSIQ-LLMMSMFLSPL----MNAQIKDFVIEPPIKPNLYIYKSFGVFGGR-EYSANAAYLITKKGVVLFDVPWPKEQYQTLMDTIKKRHNLPVIAVFATHSHDDRAGDLSFYNNKGIKTFATAKTNELLKKDGKATSTDIIKVGKPYKIGGEEFVVDFLGEGHTVDNVVVWFPKYKVLDGGCLVKSRTATDLGFTGEANVAQWPQTMEKLKSKYSQATLIIPGHDEWKGGGHVEHTLDLLNKN	7	249	95.6522	0	6	0	243	Cluster_930	subclass_B1_metallo-beta-lactamase_IND-11_NG_049226.1_cds_WP_063860622.1_1	Cluster_755	SP_Sec_SPI_	20-21	SP_Sec_SPI_	20-21	H_x_H_x_D	H_x_x_D_N	C	H	.
B1_106	GCF_002899875.1	1241981	1241981	Chryseobacterium_lactis	Bacteria-FCB_group-Bacteroidota_Chlorobiota_group-Bacteroidota-Flavobacteriia-Flavobacteriales-Weeksellaceae-Chryseobacterium_group-Chryseobacterium-	5593731	NZ_PPEH01000012.1	class_B1	274.1	-	150658	151378	150650	151402	ATGAAGTCCCTATCTATCCTGTCTTTGCTTTCTTTAGTGTTATTCTTTGTAAGTTGTAATACTAAAAAGCCGGCTCAGGTGCCAAAAGTACTCTACAAGACGGATAACCTTTCTGTTATCCAACTGTCGGATCATGTCTATCAGCATATTTCATATTTAAATACAGATTCTTTTGGCCGGGTTCCCTGCAACGGAATGATTGTTAAAGAAGACGGTGAAGCAGTAATTTTTGATACGCCTTCCGATGATAAAAGTTCAGCAGAATTAATTAGCTGGATTAAGAATAACCTGCATGTCAATATCAATGCCGTAGTAGCCACCCATTTCCACAGTGATTGTTTGGGTGGTCTGAAGGAATTTGAAAGAAATAAAATTTCCTCTTACGCCAGCACAAGAACT…	WP_103293881.1	subclass_B1_metallo-beta-lactamase	MKSLSILSLLSLVLFFVSCNTKKPAQVPKVLYKTDNLSVIQLSDHVYQHISYLNTDSFGRVPCNGMIVKEDGEAVIFDTPSDDKSSAELISWIKNNLHVNINAVVATHFHSDCLGGLKEFERNKISSYASTRTIELAKKNNENVPQHSFDNDLTLKVGRTNVFVKYFGEGHTKDNVIAYFPDEKVMFGGCLIKEIGATKGYLGDANVKAWSGTVKKIKKQYPDVRIVIPGHGDVGGIKLLDYTINLFKDE	ORF_OK	TRUE_HIT	llllllllllslaaa....eekeeeekdelkiekladnvyvhtsykevegvgkvssngLvvidekevvlvDtpwteeqtekLldwiekklklkvkavistHfHeDrlGGlealnkkgiktyasalTnellkkegkeqakhsfkkeekltlgkekievfypGegHtkDNiVvwlpkekiLfGGClvksaeakslGnlgdAnveeWpksvekvkakypeakiVipGHgevgdkellehTlklle	SLLSLVLFFVSCNTKkpaqVPKVLYKTDNLSVIQLSDHVYQHISYLNTDSFGRVPCNGMIVKEDGEAVIFDTPSDDKSSAELISWIKNNLHVNINAVVATHFHSDCLGGLKEFERNKISSYASTRTIELAKKNNENVPQHSFDNDLTLKVGRTNVFVKYFGEGHTKDNVIAYFPDEKVMFGGCLIKEIGA-TKGYLGDANVKAWSGTVKKIKKQYPDVRIVIPGHGDVGGIKLLDYTINLFK	10	247	93.6759	4	1	0	250	Cluster_533	CLUSTER_NOT_IN_NCBI_AMR_REF_DB	Cluster_490	LIPO_Sec_SPII_	18-19	LIPO_Sec_SPII_	18-19	H_x_H_x_D	H_x_x_D_N	C	H	.
B1_107	GCF_002899895.1	741074	741074	Chryseobacterium_oncorhynchi	Bacteria-FCB_group-Bacteroidota_Chlorobiota_group-Bacteroidota-Flavobacteriia-Flavobacteriales-Weeksellaceae-Chryseobacterium_group-Chryseobacterium-	4794425	NZ_PPEI02000004.1	class_B1	276.5	+	244893	245628	244879	245637	ATGAGATTCCCCATGAAGCATATATTCATCATTTTATTTTCTTTTATGATCTTCAGTTGTAGTTCTCAGCATTCCGAGAACTTCAAAGCAAAGGAAATTTATAAATCCGAAAATTTAATTATTACCCAAATTTCTGAAAACTCGTTTATCCACACTTCTTTTAAACAAACCAATGACTTCGGAAATGTTCCCTGCAATGGCCTCATTGTTAAAAACAACGACGAAACAATTGTTTTTGACACTCCAACTCATGACAAAGATTCTGAAGAACTGATACAATGGATTACCAAAACGCTTCACTCTAAGATCAATGCTGTTATTCCAACTCATTTTCATGATGACAGCATGGGCGGGCTACAGGCATTTCACAATCATAACATCCCCTCCTATTCCTATTCA…	WP_317047565.1	CHM_family_subclass_B1_metallo-beta-lactamase	MRFPMKHIFIILFSFMIFSCSSQHSENFKAKEIYKSENLIITQISENSFIHTSFKQTNDFGNVPCNGLIVKNNDETIVFDTPTHDKDSEELIQWITKTLHSKINAVIPTHFHDDSMGGLQAFHNHNIPSYSYSKTIELGKKNNFVVPKNSFNNFITLKVGNEEVIAKFFGEGHTRDNTIGYFPSENILFGGCLLKELEAGKGYLGDANVSAWSNTVEKVKKEYPNVKIVIPGHGDYGDKKLLDYTIKLFKVQ	ORF_OK	TRUE_HIT	lrkllllllllllllslaaa.....eekeeeekdelkiekladnvyvhtsykevegvgkvssngLvvidekevvlvDtpwteeqtekLldwiekklklkvkavistHfHeDrlGGlealnkkgiktyasalTnellkkegkeqakhsfkkeekltlgkekievfypGegHtkDNiVvwlpkekiLfGGClvksaeakslGnlgdAnveeWpksvekvkakypeakiVipGHgevgdkellehTlklle	MKHI-FIILFSFMIFSCSSQhsenfKAKEIYKSENLIITQISENSFIHTSFKQTNDFGNVPCNGLIVKNNDETIVFDTPTHDKDSEELIQWITKTLHSKINAVIPTHFHDDSMGGLQAFHNHNIPSYSYSKTIELGKKNNFVVPKNSFNNFITLKVGNEEVIAKFFGEGHTRDNTIGYFPSENILFGGCLLKELEA-GKGYLGDANVSAWSNTVEKVKKEYPNVKIVIPGHGDYGDKKLLDYTIKLFK	5	247	95.6522	5	2	0	252	Cluster_257	CLUSTER_NOT_IN_NCBI_AMR_REF_DB	Cluster_261	LIPO_Sec_SPII_	19-20	LIPO_Sec_SPII_	19-20	H_x_H_x_D	H_x_x_D_N	C	H	.
B1_108	GCF_002899895.1	741074	741074	Chryseobacterium_oncorhynchi	Bacteria-FCB_group-Bacteroidota_Chlorobiota_group-Bacteroidota-Flavobacteriia-Flavobacteriales-Weeksellaceae-Chryseobacterium_group-Chryseobacterium-	4794425	NZ_PPEI02000001.1	class_B1	277.9	+	202538	203249	202536	203255	ATGAAAAAAAGCATTCCGTTTTTTATTGTTTCAATGTTGCTAAGTCCATTTGCAAATGCTCAGGTAAGAGATTTTGTGATTGAGCCACAGATTCAACCTAACTTCTATATTTACAAAACTTTCGGAGTATTCGGAGGTAAAGAATATTCTACCAATGCTGTTTATCTGGTTACCAAAAAAGGAGTTGTTTTATTTGATGTTCCATGGCAGAAAACACAATATCAAAGCTTGCTGGATACCATTCAAAAACGTCATAATCTTCCTGTAATTGCAGTATTTGCCACCCATTCGCATGAGGACAGAGCCGGAGATTTAAGCTTTTACAACAATAAAGGAATTAAAACCTATGCAACAGCCAAAACTAATGAACTGCTAAAGAAAGACGGAAAAGCCACTTCT…	WP_109617363.1	IND_family_subclass_B1_metallo-beta-lactamase	MKKSIPFFIVSMLLSPFANAQVRDFVIEPQIQPNFYIYKTFGVFGGKEYSTNAVYLVTKKGVVLFDVPWQKTQYQSLLDTIQKRHNLPVIAVFATHSHEDRAGDLSFYNNKGIKTYATAKTNELLKKDGKATSTELIKTGKPYRIGGEEFTVDFLGEGHTADNVVVWFPKYKILDGGCLVKSKSAVDLGYTGEANVAQWPKTMEKLKSKYSQATLVIPGHDEWKGGGHVEHTLELLNKK	ORF_OK	TRUE_HIT	lrkllllllllllllslaaaeekeeeekdelkiekladnvyvhtsykevegvgkvssngLvvidekevvlvDtpwteeqtekLldwiekklklkvkavistHfHeDrlGGlealnkkgiktyasalTnellkkegkeqakhsfkkeekltlgkekievfypGegHtkDNiVvwlpkekiLfGGClvksaeakslGnlgdAnveeWpksvekvkakypeakiVipGHgevgdkellehTlkllek	MKKSIPFFIV-SMLLSPF----ANAQVRDFVIEPQIQPNFYIYKTFGVFGGK-EYSTNAVYLVTKKGVVLFDVPWQKTQYQSLLDTIQKRHNLPVIAVFATHSHEDRAGDLSFYNNKGIKTYATAKTNELLKKDGKATSTELIKTGKPYRIGGEEFTVDFLGEGHTADNVVVWFPKYKILDGGCLVKSKSAVDLGYTGEANVAQWPKTMEKLKSKYSQATLVIPGHDEWKGGGHVEHTLELLNK	5	248	96.0474	0	6	0	239	Cluster_751	IND_family_subclass_B1_metallo-beta-lactamase_CGB-1_NG_051689.1_cds_WP_002979282.1_1	Cluster_755	SP_Sec_SPI_	20-21	SP_Sec_SPI_	20-21	H_x_H_x_D	H_x_x_D_N	C	H	.
B1_109	GCF_002899945.2	1037377	1037377	Chryseobacterium_viscerum	Bacteria-FCB_group-Bacteroidota_Chlorobiota_group-Bacteroidota-Flavobacteriia-Flavobacteriales-Weeksellaceae-Chryseobacterium_group-Chryseobacterium-	5693782	NZ_PPEG02000002.1	class_B1	268.2	+	205934	206663	205914	206672	ATGAAAATTAGTAGTAATAATATAGTTGTCATTTTATTGTCTTTCATTATTCTAAGCTGCAGTTCGCGGAATAAAAATCCTTTTAAAGCAAAAGAAATTTATAAATCCAATACTCTGATCATTACTCAGATTTCAGAACATTCTTTTATTCATACTTCCTTTAAGCAGACCAATGATTTCGGAAATGTCCCTTGTAACGGATTGATTGTAAAAGATCGGGATGAAACTATCGTTTTTGATACTCCTACTAATGATAAAAGTTCTGAGGAGCTGATTAAATGGATTACTGAAAAACTCCATGCAAAAATCAATGCGGTGGTTCCTACCCATTTTCATGATGATAGTTTAGGTGGATTGATGGCATTCCACAAGAATAATATTCCTTCTTATTCATATGCT…	WP_103232925.1	CHM_family_subclass_B1_metallo-beta-lactamase	MKISSNNIVVILLSFIILSCSSRNKNPFKAKEIYKSNTLIITQISEHSFIHTSFKQTNDFGNVPCNGLIVKDRDETIVFDTPTNDKSSEELIKWITEKLHAKINAVVPTHFHDDSLGGLMAFHKNNIPSYSYAKTIELAKENNFVIPENSFNDAVVLKVGDKEVTAKFFGEGHTKDNAVGYFPSENILFGGCLLKELEAGKGYLGDANVSAWSNTVEKVKKEYPNVKIVVPGHGDYGDGRLLDYTIQLFKGE	ORF_OK	TRUE_HIT	llllllllllllslaaa.....eekeeeekdelkiekladnvyvhtsykevegvgkvssngLvvidekevvlvDtpwteeqtekLldwiekklklkvkavistHfHeDrlGGlealnkkgiktyasalTnellkkegkeqakhsfkkeekltlgkekievfypGegHtkDNiVvwlpkekiLfGGClvksaeakslGnlgdAnveeWpksvekvkakypeakiVipGHgevgdkellehTlklle	NIVVILLSFIILSCSSRnknpfKAKEIYKSNTLIITQISEHSFIHTSFKQTNDFGNVPCNGLIVKDRDETIVFDTPTNDKSSEELIKWITEKLHAKINAVVPTHFHDDSLGGLMAFHKNNIPSYSYAKTIELAKENNFVIPENSFNDAVVLKVGDKEVTAKFFGEGHTKDNAVGYFPSENILFGGCLLKELEA-GKGYLGDANVSAWSNTVEKVKKEYPNVKIVVPGHGDYGDGRLLDYTIQLFK	8	247	94.4664	5	1	0	252	Cluster_375	CLUSTER_NOT_IN_NCBI_AMR_REF_DB	Cluster_384	LIPO_Sec_SPII_	19-20	LIPO_Sec_SPII_	19-20	H_x_H_x_D	H_x_x_D_N	C	H	.
B1_11	GCF_002844795.1	2060113	2060113	Bacillus_sp_BI3	Bacteria-Terrabacteria_group-Bacillota-Bacilli-Bacillales-Bacillaceae-Bacillus-unclassified_Bacillus_in_firmicutes-	5636241	NZ_PJOQ01000001.1	class_B1	277.1	+	1376126	1376825	1376055	1376828	ATGAAAAAGAATACGTTGTTAAAAGTAGGATTATGTGTAGGTTTACTAGGAACAATTCAATTTGTTAGCACAATTTCTTCTGTACAAGCATCACAAAAGGTAGAGAAAACAGTAATAAAAAATGAGACGGGAACCATTTCAATATCTCAGTTAAACAAGAATGTATGGGTTCATACGGAGTTAGGTTCTTTTAATGGAGAAGCAGTTCCTTCGAACGGTCTAGTTCTTAATACTTCTAAAGGGTTAGTACTTGTGGATTCTTCTTGGGATGACAAATTAACGAAGGAACTAATAGAAATGGTAGAAAAGAAATTTCAGAAGCGCGTAACGGATGTCATTATTACACATGCGCACGCTGATCGAATTGGCGGAATAAAAACGTTGAAAGAAAGAGGCATT…	WP_044584721.1	BcII_family_subclass_B1_metallo-beta-lactamase	MKKNTLLKVGLCVGLLGTIQFVSTISSVQASQKVEKTVIKNETGTISISQLNKNVWVHTELGSFNGEAVPSNGLVLNTSKGLVLVDSSWDDKLTKELIEMVEKKFQKRVTDVIITHAHADRIGGIKTLKERGIKAHSTALTAELAKKNGYEEPLGDLQTVTNLKFGNMKVETFYPGKGHTEDNIVVWLPQYNILVGGCLVKSTSAKDLGNVADAYVNEWSTSIENVLKRYRNINVVVPGHGEVGNKGLLLHTLDLLK	ORF_OK	TRUE_HIT	lllslaaa........eekeeeekdelkiekladnvyvhtsykevegvgkvssngLvvidekevvlvDtpwteeqtekLldwiekklklkvkavistHfHeDrlGGlealnkkgiktyasalTnellkkegkeqakhsfkkeekltlgkekievfypGegHtkDNiVvwlpkekiLfGGClvksaeakslGnlgdAnveeWpksvekvkakypeakiVipGHgevgdkellehTlklle	TIS----SvqasqkveKTVIKNETGTISISQLNKNVWVHTELGSFNGE-AVPSNGLVLNTSKGLVLVDSSWDDKLTKELIEMVEKKFQKRVTDVIITHAHADRIGGIKTLKERGIKAHSTALTAELAKKNGYEEPLGDLQTVTNLKFGNMKVETFYPGKGHTEDNIVVWLPQYNILVGGCLVKSTSAKDLGNVADAYVNEWSTSIENVLKRYRNINVVVPGHGEVGNKGLLLHTLDLLK	17	247	90.9091	8	5	0	257	Cluster_137	BcII_family_subclass_B1_metallo-beta-lactamase_NG_047224.1_cds_WP_012261328.1_1	Cluster_139	SP_Sec_SPI_	30-31	SP_Sec_SPI_	30-31	H_x_H_x_D	H_x_x_D_N	C	H	.
B1_110	GCF_002899945.2	1037377	1037377	Chryseobacterium_viscerum	Bacteria-FCB_group-Bacteroidota_Chlorobiota_group-Bacteroidota-Flavobacteriia-Flavobacteriales-Weeksellaceae-Chryseobacterium_group-Chryseobacterium-	5693782	NZ_PPEG02000005.1	class_B1	278.4	-	497369	498080	497364	498083	ATGAAAAAAAGCATTCCGTTTTTTATTATTTCGATGTTGTTAAGCCCTTTTGCAAATGCTCAGGTAAGAGATTTCGTTATTGAACCCCAGATTAAACCCAACTTCTATATTTACAAAACTTTTGGCGTATTCGGAGGGAAGGAATATTCTACCAATGCAGTGTATCTTGTTACTAAAAAAGGAGTGGTTTTATTTGATGTTCCATGGCAGAAAACTCAATACCAAAGTCTGCTGGACACGATCCAAAAGCGCCATAACCTTCCTGTCATTGCGGTATTTGCCACTCACTCTCACGAAGACAGAGCCGGAGATTTAAGCTTTTATAATAAAAAAGGAATTAAAACCTATGCTACAGCAAAAACCAATGAACTGCTAAAGAAAGATGGAAAAGCTACGTCT…	WP_103234201.1	IND_family_subclass_B1_metallo-beta-lactamase	MKKSIPFFIISMLLSPFANAQVRDFVIEPQIKPNFYIYKTFGVFGGKEYSTNAVYLVTKKGVVLFDVPWQKTQYQSLLDTIQKRHNLPVIAVFATHSHEDRAGDLSFYNKKGIKTYATAKTNELLKKDGKATSTELIKTGKPYRIGGEEFTVDFLGEGHTADNVVVWFPKYKILDGGCLVKSKAAVDLGYTGEANVAQWPKTMEKLKSKYSQATLIIPGHDEWKGGGHVEHTLDLLNKK	ORF_OK	TRUE_HIT	lrkllllllllllllslaaaeekeeeekdelkiekladnvyvhtsykevegvgkvssngLvvidekevvlvDtpwteeqtekLldwiekklklkvkavistHfHeDrlGGlealnkkgiktyasalTnellkkegkeqakhsfkkeekltlgkekievfypGegHtkDNiVvwlpkekiLfGGClvksaeakslGnlgdAnveeWpksvekvkakypeakiVipGHgevgdkellehTlkllek	MKKSIPFFI-ISMLLSPF----ANAQVRDFVIEPQIKPNFYIYKTFGVFGGK-EYSTNAVYLVTKKGVVLFDVPWQKTQYQSLLDTIQKRHNLPVIAVFATHSHEDRAGDLSFYNKKGIKTYATAKTNELLKKDGKATSTELIKTGKPYRIGGEEFTVDFLGEGHTADNVVVWFPKYKILDGGCLVKSKAAVDLGYTGEANVAQWPKTMEKLKSKYSQATLIIPGHDEWKGGGHVEHTLDLLNK	5	248	96.0474	0	6	0	239	Cluster_751	IND_family_subclass_B1_metallo-beta-lactamase_CGB-1_NG_051689.1_cds_WP_002979282.1_1	Cluster_755	SP_Sec_SPI_	20-21	SP_Sec_SPI_	20-21	H_x_H_x_D	H_x_x_D_N	C	H	.
B1_111	GCF_002902885.1	470	470	Acinetobacter_baumannii	Bacteria-Pseudomonadota-Gammaproteobacteria-Moraxellales-Moraxellaceae-Acinetobacter-Acinetobacter_calcoaceticus_baumannii_complex-	4078838	NZ_CP026127.1	class_B1	269.8	-	12019	12787	12011	12823	ATGGAATTGCCCAATATTATGCACCCGGTCGCGAAGCTGAGCACCGCATTAGCCGCTGCATTGATGCTGAGCGGGTGCATGCCCGGTGAAATCCGCCCGACGATTGGCCAGCAAATGGAAACTGGCGACCAACGGTTTGGCGATCTGGTTTTCCGCCAGCTCGCACCGAATGTCTGGCAGCACACTTCCTATCTCGACATGCCGGGTTTCGGGGCAGTCGCTTCCAACGGTTTGATCGTCAGGGATGGCGGCCGCGTGCTGGTGGTCGATACCGCCTGGACCGATGACCAGACCGCCCAGATCCTCAACTGGATCAAGCAGGAGATCAACCTGCCGGTCGCGCTGGCGGTGGTGACTCACGCGCATCAGGACAAGATGGGCGGTATGGACGCGCTGCAT…	WP_004201164.1	subclass_B1_metallo-beta-lactamase_NDM-1	MELPNIMHPVAKLSTALAAALMLSGCMPGEIRPTIGQQMETGDQRFGDLVFRQLAPNVWQHTSYLDMPGFGAVASNGLIVRDGGRVLVVDTAWTDDQTAQILNWIKQEINLPVALAVVTHAHQDKMGGMDALHAAGIATYANALSNQLAPQEGMVAAQHSLTFAANGWVEPATAPNFGPLKVFYPGPGHTSDNITVGIDGTDIAFGGCLIKDSKAKSLGNLGDADTEHYAASARAFGAAFPKASMIVMSHSAPDSRAAITHTARMADKLR	ORF_OK	TRUE_HIT	kllllllllllllslaaa.........eekeeeekdelkiekladnvyvhtsykevegvgkvssngLvvidekevvlvDtpwteeqtekLldwiekklklkvkavistHfHeDrlGGlealnkkgiktyasalTnellkkegkeqakhsfkkeek......ltlgkekievfypGegHtkDNiVvwlpkekiLfGGClvksaeakslGnlgdAnveeWpksvekvkakypeakiVipGHgevgdkellehTlkllek	KLSTALAAALMLSGCMPGeirptigqqMETGDQRFGDLVFRQLAPNVWQHTSYLDMPGFGAVASNGLIVRDGGRVLVVDTAWTDDQTAQILNWIKQEINLPVALAVVTHAHQDKMGGMDALHAAGIATYANALSNQLAPQEGMVAAQHSLTFAANgwvepaTAPNFGPLKVFYPGPGHTSDNITVGIDGTDIAFGGCLIKDSKAKSLGNLGDADTEHYAASARAFGAAFPKASMIVMSHSAPDSRAAITHTARMADK	7	248	95.2569	15	0	0	270	Cluster_118	subclass_B1_metallo-beta-lactamase_NDM-18_NG_052866.1_cds_WP_077064890.1_1	Cluster_120	LIPO_Sec_SPII_	25-26	LIPO_Sec_SPII_	25-26	H_x_H_x_D	H_x_x_D_N	C	H	.
B1_112	GCF_002903125.1	562	562	Escherichia_coli	Bacteria-Pseudomonadota-Gammaproteobacteria-Enterobacterales-Enterobacteriaceae-Escherichia-	5068035	NZ_CP026201.1	class_B1	268.1	+	48317	49085	48282	49094	ATGGAATTGCCCAATATTATGCACCCGGTCGCGAAGCTGAGCACCGCATTAGCCGCTGCATTGATGCTGAGCGGGTGCATGCCCGGTGAAATCCGCCCGACGATTGGCCAGCAAATGGAAACTGGCGACCAACGGTTTGGCGATCTGGTTTTCCGCCAGCTCGCACCGAATGTCTGGCAGCACACTTCCTATCTCGACATGCCGGGTTTCGGGGCAGTCGCTTCCAACGGTTTGATCGTCAGGGATGGCGGCCGCGTGCTGTTGGTCGATACCGCCTGGACCGATGACCAGACCGCCCAGATCCTCAACTGGATCAAGCAGGAGATCAACCTGCCGGTCGCGCTGGCGGTGGTGACTCACGCGCATCAGGACAAGATGGGCGGTATGGACGCGCTGCAT…	WP_023408309.1	subclass_B1_metallo-beta-lactamase_NDM-5	MELPNIMHPVAKLSTALAAALMLSGCMPGEIRPTIGQQMETGDQRFGDLVFRQLAPNVWQHTSYLDMPGFGAVASNGLIVRDGGRVLLVDTAWTDDQTAQILNWIKQEINLPVALAVVTHAHQDKMGGMDALHAAGIATYANALSNQLAPQEGLVAAQHSLTFAANGWVEPATAPNFGPLKVFYPGPGHTSDNITVGIDGTDIAFGGCLIKDSKAKSLGNLGDADTEHYAASARAFGAAFPKASMIVMSHSAPDSRAAITHTARMADKLR	ORF_OK	TRUE_HIT	kllllllllllllslaaa.........eekeeeekdelkiekladnvyvhtsykevegvgkvssngLvvidekevvlvDtpwteeqtekLldwiekklklkvkavistHfHeDrlGGlealnkkgiktyasalTnellkkegkeqakhsfkkeek......ltlgkekievfypGegHtkDNiVvwlpkekiLfGGClvksaeakslGnlgdAnveeWpksvekvkakypeakiVipGHgevgdkellehTlkllek	KLSTALAAALMLSGCMPGeirptigqqMETGDQRFGDLVFRQLAPNVWQHTSYLDMPGFGAVASNGLIVRDGGRVLLVDTAWTDDQTAQILNWIKQEINLPVALAVVTHAHQDKMGGMDALHAAGIATYANALSNQLAPQEGLVAAQHSLTFAANgwvepaTAPNFGPLKVFYPGPGHTSDNITVGIDGTDIAFGGCLIKDSKAKSLGNLGDADTEHYAASARAFGAAFPKASMIVMSHSAPDSRAAITHTARMADK	7	248	95.2569	15	0	0	270	Cluster_118	subclass_B1_metallo-beta-lactamase_NDM-18_NG_052866.1_cds_WP_077064890.1_1	Cluster_120	LIPO_Sec_SPII_	25-26	LIPO_Sec_SPII_	25-26	H_x_H_x_D	H_x_x_D_N	C	H	.
B1_113	GCF_002903925.1	573	573	Klebsiella_pneumoniae	Bacteria-Pseudomonadota-Gammaproteobacteria-Enterobacterales-Enterobacteriaceae-Klebsiella_Raoultella_group-Klebsiella-	5515660	NZ_PDLU01000121.1	class_B1	274.6	+	175	940	155	955	ATGTTAAAAGTTATTAGTAGTTTATTGGTCTACATGACCGCGTCTGTCATGGCTGTCGCAAGTCCGTTAGCCCATTCCGGGGAGCCGAGTGGTGAGTATCCGACAGTCAACGAAATTCCGGTCGGAGAGGTCCGACTTTACCAGATTGCCGATGGTGTTTGGTCGCATATCGCAACGCAGTCGTTTGATGGCGCGGTCTACCCGTCCAATGGTCTCATTGTCCGTGATGGTGATGAGTTGCTTTTGATTGATACAGCGTGGGGTGCGAAAAACACAGCGGCACTTCTCGCGGAGATTGAAAAGCAAATTGGACTTCCCGTAACGCGTGCAGTCTCCACGCACTTTCATGACGACCGCGTCGGCGGCGTTGATGTCCTTCGGGCGGCTGGGGTGGCAACG…	WP_013263789.1	subclass_B1_metallo-beta-lactamase_VIM-1	MLKVISSLLVYMTASVMAVASPLAHSGEPSGEYPTVNEIPVGEVRLYQIADGVWSHIATQSFDGAVYPSNGLIVRDGDELLLIDTAWGAKNTAALLAEIEKQIGLPVTRAVSTHFHDDRVGGVDVLRAAGVATYASPSTRRLAEAEGNEIPTHSLEGLSSSGDAVRFGPVELFYPGAAHSTDNLVVYVPSANVLYGGCAVHELSSTSAGNVADADLAEWPTSVERIQKHYPEAEVVIPGHGLPGGLDLLQHTANVVKAHKNRSVAE	ORF_OK	TRUE_HIT	lllllllllslaaa.............eekeeeekdelkiekladnvyvhtsykevegvgkvssngLvvidekevvlvDtpwteeqtekLldwiekklklkvkavistHfHeDrlGGlealnkkgiktyasalTnellkkegkeqakhsfkkeek..ltlgkekievfypGegHtkDNiVvwlpkekiLfGGClvksaeakslGnlgdAnveeWpksvekvkakypeakiVipGHgevgdkellehTlkllekakkk	SLLVYMTASVMAVAsplahsgepsgeyPTVNEIPVGEVRLYQIADGVWSHIATQSFDGA-VYPSNGLIVRDGDELLLIDTAWGAKNTAALLAEIEKQIGLPVTRAVSTHFHDDRVGGVDVLRAAGVATYASPSTRRLAEAEGNEIPTHSLEGLSSsgDAVRFGPVELFYPGAAHSTDNLVVYVPSANVLYGGCAVHELSSTSAGNVADADLAEWPTSVERIQKHYPEAEVVIPGHGLPGGLDLLQHTANVVKAHKNR	11	252	95.2569	15	1	0	266	Cluster_131	subclass_B1_metallo-beta-lactamase_VIM-1_NG_050336.1_cds_WP_013263789.1_1	Cluster_134	SP_Sec_SPI_	26-27	SP_Sec_SPI_	26-27	H_x_H_x_D	H_x_x_D_N	C	H	.
B1_114	GCF_002909185.1	1405	1405	Bacillus_mycoides	Bacteria-Terrabacteria_group-Bacillota-Bacilli-Bacillales-Bacillaceae-Bacillus-Bacillus_cereus_group-	6015410	NZ_MKZQ01000069.1	class_B1	276.5	+	244300	245011	244241	245014	ATGAAAAAGAATATATTATTAAAAGTAGGGGTATGTGTTAGTTTACTAGGAACAATTCAATTTGTTAGCACAATTTCTTCTGTGAAAGCGGAACAAAAGCTAGAGCAAAAAGTAATAAAGAATGAGACAGGAACTATTTCAATTTCTCAGTTAAACAAAAATGTATGGGTTCATACTGAGTTAGGTTATTTTAATGGAGTAGCAGTTCCTTCGAACGGTCTAGTTCTTAACACTTCTAAAGGGTTAGTGCTTGTCGATTCTTCTTGGGATGATAAGTTAACGAAGGAACTAATAGAGATGGTAGAAAAGAAATTTCAGAAGCGCGTAACGGATGTCATTATTACACATGCGCATGCTGATCGAATTGGCGGGATAAAAACGTTGAAAGAAAGAGGCATT…	WP_002128375.1	BcII_family_subclass_B1_metallo-beta-lactamase	MKKNILLKVGVCVSLLGTIQFVSTISSVKAEQKLEQKVIKNETGTISISQLNKNVWVHTELGYFNGVAVPSNGLVLNTSKGLVLVDSSWDDKLTKELIEMVEKKFQKRVTDVIITHAHADRIGGIKTLKERGIKAHSTALTAELAKKNGYEEPLGDLQTITNMKFGNIKVETFYPGKGHTEDNIVVWLPQYNILAGGCLVKSAEAKDLGNVADAYVNEWSISIENVLNRYGNTNSVVPGHGDIGDKGLLLHTLNLLK	ORF_OK	TRUE_HIT	lllslaaa...........eekeeeekdelkiekladnvyvhtsykevegvgkvssngLvvidekevvlvDtpwteeqtekLldwiekklklkvkavistHfHeDrlGGlealnkkgiktyasalTnellkkegkeqakhsfkkeekltlgkekievfypGegHtkDNiVvwlpkekiLfGGClvksaeakslGnlgdAnveeWpksvekvkakypeakiVipGHgevgdkellehTlklle	QFVS---TissvkaeqkleQKVIKNETGTISISQLNKNVWVHTELGYFNGV-AVPSNGLVLNTSKGLVLVDSSWDDKLTKELIEMVEKKFQKRVTDVIITHAHADRIGGIKTLKERGIKAHSTALTAELAKKNGYEEPLGDLQTITNMKFGNIKVETFYPGKGHTEDNIVVWLPQYNILAGGCLVKSAEAKDLGNVADAYVNEWSISIENVLNRYGNTNSVVPGHGDIGDKGLLLHTLNLLK	17	247	90.9091	11	4	0	257	Cluster_137	BcII_family_subclass_B1_metallo-beta-lactamase_NG_047224.1_cds_WP_012261328.1_1	Cluster_139	SP_Sec_SPI_	30-31	SP_Sec_SPI_	30-31	H_x_H_x_D	H_x_x_D_N	C	H	.
B1_115	GCF_002909205.1	1405	1405	Bacillus_mycoides	Bacteria-Terrabacteria_group-Bacillota-Bacilli-Bacillales-Bacillaceae-Bacillus-Bacillus_cereus_group-	6016834	NZ_MKZP01000004.1	class_B1	276.5	+	244046	244757	243987	244760	ATGAAAAAGAATATATTATTAAAAGTAGGGGTATGTGTTAGTTTACTAGGAACAATTCAATTTGTTAGCACAATTTCTTCTGTGAAAGCGGAACAAAAGCTAGAGCAAAAAGTAATAAAGAATGAGACAGGAACTATTTCAATTTCTCAGTTAAACAAAAATGTATGGGTTCATACTGAGTTAGGTTATTTTAATGGAGTAGCAGTTCCTTCGAACGGTCTAGTTCTTAACACTTCTAAAGGGTTAGTGCTTGTCGATTCTTCTTGGGATGATAAGTTAACGAAGGAACTAATAGAGATGGTAGAAAAGAAATTTCAGAAGCGCGTAACGGATGTCATTATTACACATGCGCATGCTGATCGAATTGGCGGGATAAAAACGTTGAAAGAAAGAGGCATT…	WP_002128375.1	BcII_family_subclass_B1_metallo-beta-lactamase	MKKNILLKVGVCVSLLGTIQFVSTISSVKAEQKLEQKVIKNETGTISISQLNKNVWVHTELGYFNGVAVPSNGLVLNTSKGLVLVDSSWDDKLTKELIEMVEKKFQKRVTDVIITHAHADRIGGIKTLKERGIKAHSTALTAELAKKNGYEEPLGDLQTITNMKFGNIKVETFYPGKGHTEDNIVVWLPQYNILAGGCLVKSAEAKDLGNVADAYVNEWSISIENVLNRYGNTNSVVPGHGDIGDKGLLLHTLNLLK	ORF_OK	TRUE_HIT	lllslaaa...........eekeeeekdelkiekladnvyvhtsykevegvgkvssngLvvidekevvlvDtpwteeqtekLldwiekklklkvkavistHfHeDrlGGlealnkkgiktyasalTnellkkegkeqakhsfkkeekltlgkekievfypGegHtkDNiVvwlpkekiLfGGClvksaeakslGnlgdAnveeWpksvekvkakypeakiVipGHgevgdkellehTlklle	QFVS---TissvkaeqkleQKVIKNETGTISISQLNKNVWVHTELGYFNGV-AVPSNGLVLNTSKGLVLVDSSWDDKLTKELIEMVEKKFQKRVTDVIITHAHADRIGGIKTLKERGIKAHSTALTAELAKKNGYEEPLGDLQTITNMKFGNIKVETFYPGKGHTEDNIVVWLPQYNILAGGCLVKSAEAKDLGNVADAYVNEWSISIENVLNRYGNTNSVVPGHGDIGDKGLLLHTLNLLK	17	247	90.9091	11	4	0	257	Cluster_137	BcII_family_subclass_B1_metallo-beta-lactamase_NG_047224.1_cds_WP_012261328.1_1	Cluster_139	SP_Sec_SPI_	30-31	SP_Sec_SPI_	30-31	H_x_H_x_D	H_x_x_D_N	C	H	.
B1_116	GCF_002909615.1	492670	492670	Bacillus_velezensis	Bacteria-Terrabacteria_group-Bacillota-Bacilli-Bacillales-Bacillaceae-Bacillus-Bacillus_subtilis_group-Bacillus_amyloliquefaciens_group-	4079992	NZ_PPXP01000001.1	class_B1	228	-	2896726	2897431	2896721	2897470	TTGAGAAAGCTTTCATTATTAATTGCGGGGTTATTTCTATTCGGCCTCTTTACTGCCGGAATGAAACCGGCACACGCGGCGGATGGCTCCGCAGCAAAAGATGTCACTCTCACACAGCTGGCGCCGCATGTCTGGATGCATACAAGCACCGGTACGGCAGACGGAAGTCCCGTCCCTGCGAACGGATTGCTTCTTGAGACTTCCAAAGGAATCGTACTGATTGATACTCCGTGGAATGACAGTCTCACAGAGCAATTAATGACACAAATAAAAAAGCGGTTTCCCGGCAAAAGGATGACCGATGCCATTGTGACACACGCCCATGATGATCGTATCGGCGGTCTGAACACCCTGTACAAATACGGTGTAAAGGTGCACAGCACGAAACTGACCGCCGAC…	WP_017417467.1	subclass_B1_metallo-beta-lactamase	MRKLSLLIAGLFLFGLFTAGMKPAHAADGSAAKDVTLTQLAPHVWMHTSTGTADGSPVPANGLLLETSKGIVLIDTPWNDSLTEQLMTQIKKRFPGKRMTDAIVTHAHDDRIGGLNTLYKYGVKVHSTKLTADFARQQGYDRPLGDLKNVTKLQFGDMKIETFYPGKGHTEDNMTVWLPEDKLLFGGCLIKALETKEIVPTPGFYPDQWPRAVRKVMKRYQDISIVVPGHGSPGDDRLLPHTISLLKET	ORF_OK	TRUE_HIT	lllllllslaaaeekeeeekdelkiekladnvyvhtsykevegvgkvssngLvvidekevvlvDtpwteeqtekLldwiekkl.klkvkavistHfHeDrlGGlealnkkgiktyasalTnellkkegkeqakhsfkkeekltlgkekievfypGegHtkDNiVvwlpkekiLfGGClvksaeakslGnlgdAnveeWpksvekvkakypeakiVipGHgevgdkellehTlkllek	LFGLFTAGMKPAHAADGSAAKDVTLTQLAPHVWMHTSTGTADGS-PVPANGLLLETSKGIVLIDTPWNDSLTEQLMTQIKKRFpGKRMTDAIVTHAHDDRIGGLNTLYKYGVKVHSTKLTADFARQQGYDRPLGDLKNVTKLQFGDMKIETFYPGKGHTEDNMTVWLPEDKLLFGGCLIKALETKEIVPTPGFYPDQWPRAVRKVMKRYQDISIVVPGHGSPGDDRLLPHTISLLKE	13	248	92.8854	1	1	0	249	Cluster_210	CLUSTER_NOT_IN_NCBI_AMR_REF_DB	Cluster_216	SP_Sec_SPI_	26-27	SP_Sec_SPI_	26-27	H_x_H_x_D	H_x_x_D_N	C	H	.
B1_117	GCF_002911745.1	128936	1428	Bacillus_thuringiensis_serovar_japonensis	Bacteria-Terrabacteria_group-Bacillota-Bacilli-Bacillales-Bacillaceae-Bacillus-Bacillus_cereus_group-	6326962	NZ_PGDR01000010.1	class_B1	279.4	-	257440	258139	257438	258211	ATGAAAAAGAATACGTTGTTAAAAGTAGGATTATGTGTAGGTTTACTAGGAACAATTCAATTTGTTAGCACAATTTCTTCTGTACAAGCATCACAAAAGGTAGAGAAAACAGTAATAAAAAATGAGACGGGAACCATTTCAATATCTCAGTTAAACAAGAATGTATGGGTTCATACGGAGTTAGGTTCTTTTAATGGAGAAGCAGTTCCTTCGAACGGTCTAGTTCTTAATACTTCTAAAGGGTTAGTACTTGTGGATTCTTCTTGGGATGACAAATTAACGAAGGAACTAATAGAAATGGTAGAAAAGAAATTTCAGAAGCGCGTAACGGATGTCATTATTACACATGCGCACGCTGATCGAATTGGCGGAATAAAAACGTTGAAAGAAAGAGGCATT…	WP_044584721.1	BcII_family_subclass_B1_metallo-beta-lactamase	MKKNTLLKVGLCVGLLGTIQFVSTISSVQASQKVEKTVIKNETGTISISQLNKNVWVHTELGSFNGEAVPSNGLVLNTSKGLVLVDSSWDDKLTKELIEMVEKKFQKRVTDVIITHAHADRIGGIKTLKERGIKAHSTALTAELAKKNGYEEPLGDLQTVTNLKFGNMKVETFYPGKGHTEDNIVVWLPQYNILVGGCLVKSTSAKDLGNVADAYVNEWSTSIENVLKRYRNINVVVPGHGEVGNKGLLLHTLDLLK	ORF_OK	TRUE_HIT	lllslaaa........eekeeeekdelkiekladnvyvhtsykevegvgkvssngLvvidekevvlvDtpwteeqtekLldwiekklklkvkavistHfHeDrlGGlealnkkgiktyasalTnellkkegkeqakhsfkkeekltlgkekievfypGegHtkDNiVvwlpkekiLfGGClvksaeakslGnlgdAnveeWpksvekvkakypeakiVipGHgevgdkellehTlklle	TIS----SvqasqkveKTVIKNETGTISISQLNKNVWVHTELGSFNGE-AVPSNGLVLNTSKGLVLVDSSWDDKLTKELIEMVEKKFQKRVTDVIITHAHADRIGGIKTLKERGIKAHSTALTAELAKKNGYEEPLGDLQTVTNLKFGNMKVETFYPGKGHTEDNIVVWLPQYNILVGGCLVKSTSAKDLGNVADAYVNEWSTSIENVLKRYRNINVVVPGHGEVGNKGLLLHTLDLLK	17	247	90.9091	8	5	0	257	Cluster_137	BcII_family_subclass_B1_metallo-beta-lactamase_NG_047224.1_cds_WP_012261328.1_1	Cluster_139	SP_Sec_SPI_	30-31	SP_Sec_SPI_	30-31	H_x_H_x_D	H_x_x_D_N	C	H	.
B1_118	GCF_002911755.1	1432	1428	Bacillus_thuringiensis_serovar_thuringiensis	Bacteria-Terrabacteria_group-Bacillota-Bacilli-Bacillales-Bacillaceae-Bacillus-Bacillus_cereus_group-	6321394	NZ_PGDU01000066.1	class_B1	276.4	-	35489	36194	35487	36260	ATGAAAAAGAATACGTTGTTAAAAGTAGGATTATGTGTAAGTTTACTAGGAACAACTCAATTTGTTAGCACGATTTCTTCTGCACAAGCATCACAAAAGGTAGAGCAAATAGTAATCAAAAATGAGACGGGAACCATTTCAATATCTCAGTTAAACAAGAATGTATGGGTTCATACGGAGTTAGGTTATTTTAATGGAGAAGCAGTTCCTTCGAACGGTCTAGTTCTTAATACTTCTAAAGGGTTAGTACTTGTTGATTCTTCTTGGGATAACAAATTAACGAAGGAACTAATAGAAATGGTAGAAAAGAAATTTCAGAAGCGCGTAACAGATGTCATTATTACACATGCGCACGCTGATCGAATTGGCGGAATAACAGCGTTGAAAGAAAGAGGCATT…	WP_000742481.1	BcII_family_subclass_B1_metallo-beta-lactamase	MKKNTLLKVGLCVSLLGTTQFVSTISSAQASQKVEQIVIKNETGTISISQLNKNVWVHTELGYFNGEAVPSNGLVLNTSKGLVLVDSSWDNKLTKELIEMVEKKFQKRVTDVIITHAHADRIGGITALKERGIKAHSTALTAELAKNSGYEEPLGDLQTITSLKFGNTKVETFYPGKGHTEDNIVVWLPQYQILAGGCLVKSAEAKDLGNVADAYVNEWSTSIENVLKRYGNINSVVPGHGEVGDKGLLLHTLDLLK	ORF_OK	TRUE_HIT	lslaaa........eekeeeekdelkiekladnvyvhtsykevegvgkvssngLvvidekevvlvDtpwteeqtekLldwiekklklkvkavistHfHeDrlGGlealnkkgiktyasalTnellkkegkeqakhsfkkeekltlgkekievfypGegHtkDNiVvwlpkekiLfGGClvksaeakslGnlgdAnveeWpksvekvkakypeakiVipGHgevgdkellehTlklle	VSTISSaqasqkveQIVIKNETGTISISQLNKNVWVHTELGYFNGE-AVPSNGLVLNTSKGLVLVDSSWDNKLTKELIEMVEKKFQKRVTDVIITHAHADRIGGITALKERGIKAHSTALTAELAKNSGYEEPLGDLQTITSLKFGNTKVETFYPGKGHTEDNIVVWLPQYQILAGGCLVKSAEAKDLGNVADAYVNEWSTSIENVLKRYGNINSVVPGHGEVGDKGLLLHTLDLLK	19	247	90.1186	8	1	0	257	Cluster_137	BcII_family_subclass_B1_metallo-beta-lactamase_NG_047224.1_cds_WP_012261328.1_1	Cluster_139	SP_Sec_SPI_	30-31	SP_Sec_SPI_	30-31	H_x_H_x_D	H_x_x_D_N	C	H	.
B1_119	GCF_002911785.1	128936	1428	Bacillus_thuringiensis_serovar_japonensis	Bacteria-Terrabacteria_group-Bacillota-Bacilli-Bacillales-Bacillaceae-Bacillus-Bacillus_cereus_group-	6319882	NZ_PGEF01000102.1	class_B1	277.3	+	171937	172642	171872	172645	ATGAAAAAGAATACGTTGTTAAAAGTAGGATTATGTGTAAGTTTACTAGGAACAACTCAATTTGTTAGCACGATTTCTTCTGTACAAGCATCACAAAAGGTAGAGCAAACAGTAATTAAAAATGAGACGGGAACCATTTCAATATCTCAGTTAAACAAGAATGTATGGGTTCATACGGAGTTAGGTTATTTTAATGGAGAAGCAGTTCCTTCGAACGGTCTAGTTCTTAATACTTCTAAAGGGTTAGTACTTGTTGATTCTTCTTGGGATGATAAATTAACGAAGGAACTAATAGAAATGGTAGAAAAGAAATTTCAGAAGCGCGTAACAGATGTCGTTATTACACATGCGCACGCTGATCGAATTGGCGGAATAAAAACGTTGAAAGAAAGAGGCATT…	WP_095690445.1	BcII_family_subclass_B1_metallo-beta-lactamase	MKKNTLLKVGLCVSLLGTTQFVSTISSVQASQKVEQTVIKNETGTISISQLNKNVWVHTELGYFNGEAVPSNGLVLNTSKGLVLVDSSWDDKLTKELIEMVEKKFQKRVTDVVITHAHADRIGGIKTLKERGIKAHSTALTAELAKNSGYEEPLGDLQTITSLKFGNTKVETFYPGKGHTEDNIVVWLPQYQILAGGCLVKSAEAKDLGNVADAYVNEWSTSIENVLKRYGNINSVVPGHGEVGDKGLLLHTLDLLK	ORF_OK	TRUE_HIT	lslaaa........eekeeeekdelkiekladnvyvhtsykevegvgkvssngLvvidekevvlvDtpwteeqtekLldwiekklklkvkavistHfHeDrlGGlealnkkgiktyasalTnellkkegkeqakhsfkkeekltlgkekievfypGegHtkDNiVvwlpkekiLfGGClvksaeakslGnlgdAnveeWpksvekvkakypeakiVipGHgevgdkellehTlklle	VSTISSvqasqkveQTVIKNETGTISISQLNKNVWVHTELGYFNGE-AVPSNGLVLNTSKGLVLVDSSWDDKLTKELIEMVEKKFQKRVTDVVITHAHADRIGGIKTLKERGIKAHSTALTAELAKNSGYEEPLGDLQTITSLKFGNTKVETFYPGKGHTEDNIVVWLPQYQILAGGCLVKSAEAKDLGNVADAYVNEWSTSIENVLKRYGNINSVVPGHGEVGDKGLLLHTLDLLK	19	247	90.1186	8	1	0	257	Cluster_137	BcII_family_subclass_B1_metallo-beta-lactamase_NG_047224.1_cds_WP_012261328.1_1	Cluster_139	SP_Sec_SPI_	30-31	SP_Sec_SPI_	30-31	H_x_H_x_D	H_x_x_D_N	C	H	.
B1_12	GCF_002845065.1	573	573	Klebsiella_pneumoniae	Bacteria-Pseudomonadota-Gammaproteobacteria-Enterobacterales-Enterobacteriaceae-Klebsiella_Raoultella_group-Klebsiella-	5600578	NZ_PJOT01000054.1	class_B1	272.4	+	389	1157	354	1166	ATGGAATTGCCCAATATTATGCACCCGGTCGCGAAGCTGAGCACCGCATTAGCCGCTGCATTGATGCTGAGCGGGTGCATGCCCGGTGAAATCCGCCCGACGATTGGCCAGCAAATGGAAACTGGCGACCAACGGTTTGGCGATCTGGTTTTCCGCCAGCTCGCACCGAATGTCTGGCAGCACACTTCCTATCTCGACATGCCGGGTTTCGGGGCAGTCGCTTCCAACGGTTTGATCGTCAGGGATGGCGGCCGCGTGCTGGTGGTCGATACCGCCTGGACCGATGACCAGACCGCCCAGATCCTCAACTGGATCAAGCAGGAGATCAACCTGCCGGTCGCGCTGGCGGTGGTGACTCACGCGCATCAGGACAAGATGGGCGGTATGGACGCGCTGCAT…	WP_004201164.1	subclass_B1_metallo-beta-lactamase_NDM-1	MELPNIMHPVAKLSTALAAALMLSGCMPGEIRPTIGQQMETGDQRFGDLVFRQLAPNVWQHTSYLDMPGFGAVASNGLIVRDGGRVLVVDTAWTDDQTAQILNWIKQEINLPVALAVVTHAHQDKMGGMDALHAAGIATYANALSNQLAPQEGMVAAQHSLTFAANGWVEPATAPNFGPLKVFYPGPGHTSDNITVGIDGTDIAFGGCLIKDSKAKSLGNLGDADTEHYAASARAFGAAFPKASMIVMSHSAPDSRAAITHTARMADKLR	ORF_OK	TRUE_HIT	kllllllllllllslaaa.........eekeeeekdelkiekladnvyvhtsykevegvgkvssngLvvidekevvlvDtpwteeqtekLldwiekklklkvkavistHfHeDrlGGlealnkkgiktyasalTnellkkegkeqakhsfkkeek......ltlgkekievfypGegHtkDNiVvwlpkekiLfGGClvksaeakslGnlgdAnveeWpksvekvkakypeakiVipGHgevgdkellehTlkllek	KLSTALAAALMLSGCMPGeirptigqqMETGDQRFGDLVFRQLAPNVWQHTSYLDMPGFGAVASNGLIVRDGGRVLVVDTAWTDDQTAQILNWIKQEINLPVALAVVTHAHQDKMGGMDALHAAGIATYANALSNQLAPQEGMVAAQHSLTFAANgwvepaTAPNFGPLKVFYPGPGHTSDNITVGIDGTDIAFGGCLIKDSKAKSLGNLGDADTEHYAASARAFGAAFPKASMIVMSHSAPDSRAAITHTARMADK	7	248	95.2569	15	0	0	270	Cluster_118	subclass_B1_metallo-beta-lactamase_NDM-18_NG_052866.1_cds_WP_077064890.1_1	Cluster_120	LIPO_Sec_SPII_	25-26	LIPO_Sec_SPII_	25-26	H_x_H_x_D	H_x_x_D_N	C	H	.
B1_122	GCF_002911865.1	29339	1428	Bacillus_thuringiensis_serovar_kurstaki	Bacteria-Terrabacteria_group-Bacillota-Bacilli-Bacillales-Bacillaceae-Bacillus-Bacillus_cereus_group-	6532393	NZ_PGEG01000028.1	class_B1	277	-	142011	142710	142009	142782	ATGAAAAAGAATACGTTGTTAAAAGTAGGATTATGTGTAGGTTTACTAGGAACAATTCAATTTGTTAGCACAATTTCTTCTGTACAAGCATCACAAAAGGTAGAGAAAACAGTAATAAAAAATGAGACGGGAACCATTTCAATATCTCAGTTAAACAAGAATGTATGGGTTCATACGGAGTTAGGTTCTTTTAATGGAGAAGCAGTTCCTTCGAACGGTCTAGTTCTTAATACTTCTAAAGGGTTAGTACTTGTTGATTCTTCTTGGGATGACAAATTAACGAAGGAACTAATAGAAATGGTAGAAAAGAAGTTTCAGAAGCGTGTAACGGATGTCATTATTACACATGCGCACGCTGATCGAATTGGCGGAATAAAAACGTTGAAAGAAAGAGGAATT…	WP_000742473.1	BcII_family_subclass_B1_metallo-beta-lactamase	MKKNTLLKVGLCVGLLGTIQFVSTISSVQASQKVEKTVIKNETGTISISQLNKNVWVHTELGSFNGEAVPSNGLVLNTSKGLVLVDSSWDDKLTKELIEMVEKKFQKRVTDVIITHAHADRIGGIKTLKERGIKAHSTALTAELAKKSGYEEPLGDLQTVTNLKFGNMKVETFYPGKGHTEDNIVVWLPQYNILVGGCLVKSTSAKDLGNVADAYVNEWSTSIENVLKRYRNINVVVPGHGEVGNKGLLLYTLDLLK	ORF_OK	TRUE_HIT	lllslaaa........eekeeeekdelkiekladnvyvhtsykevegvgkvssngLvvidekevvlvDtpwteeqtekLldwiekklklkvkavistHfHeDrlGGlealnkkgiktyasalTnellkkegkeqakhsfkkeekltlgkekievfypGegHtkDNiVvwlpkekiLfGGClvksaeakslGnlgdAnveeWpksvekvkakypeakiVipGHgevgdkellehTlklle	TIS----SvqasqkveKTVIKNETGTISISQLNKNVWVHTELGSFNGE-AVPSNGLVLNTSKGLVLVDSSWDDKLTKELIEMVEKKFQKRVTDVIITHAHADRIGGIKTLKERGIKAHSTALTAELAKKSGYEEPLGDLQTVTNLKFGNMKVETFYPGKGHTEDNIVVWLPQYNILVGGCLVKSTSAKDLGNVADAYVNEWSTSIENVLKRYRNINVVVPGHGEVGNKGLLLYTLDLLK	17	247	90.9091	8	5	0	257	Cluster_137	BcII_family_subclass_B1_metallo-beta-lactamase_NG_047224.1_cds_WP_012261328.1_1	Cluster_139	SP_Sec_SPI_	30-31	SP_Sec_SPI_	30-31	H_x_H_x_D	H_x_x_D_N	C	H	.
B1_123	GCF_002911875.1	180893	1428	Bacillus_thuringiensis_serovar_malayensis	Bacteria-Terrabacteria_group-Bacillota-Bacilli-Bacillales-Bacillaceae-Bacillus-Bacillus_cereus_group-	5892111	NZ_PGDW01000282.1	class_B1	283.7	-	18943	19642	18941	19714	ATGAAAAAGAATATATTATTAAAATTAGGAGTATGTGTTAGTTTACTAGGAACAACTCCATTTGTTAGCACAATTTCTTCTGTACAAGCATCACAAAAGGTAGAGCAAAAAGTAATGAAAAATGAGGCAGGAACTATTTCGATTTCTCAGTTAAACAAAAATGTATGGGTTCATACGGAGTTAGGTTATTTTAACGGAGAAGCAGTTCCTTCGAACGGTTTAGTTCTTACTACTTCAAAGGGGTTAGTACTTGTTGATTCTTCTTGGGATGATAAGTTAACGAAGGAATTAATAGAGATGGTAGAAAAGAAATTTAAGAAGCGCGTAACGGATGTCATTATTACACATGCACACGCTGATCGAATTGGTGGAATAAAAACGTTGAAAGAAAGAGGCATT…	WP_103626577.1	BcII_family_subclass_B1_metallo-beta-lactamase	MKKNILLKLGVCVSLLGTTPFVSTISSVQASQKVEQKVMKNEAGTISISQLNKNVWVHTELGYFNGEAVPSNGLVLTTSKGLVLVDSSWDDKLTKELIEMVEKKFKKRVTDVIITHAHADRIGGIKTLKERGIKAHSTALTAALAKKNGYEEPLGDLQTVTNLKFGNMKVETFYPGKGHTGDNIVVWLPQYNILAGGCLVKSADAKDLGNVADAYVNEWSTSIENVLKRYRNINLVVPGHGEVGDRGLLLHTLDLLK	ORF_OK	TRUE_HIT	laaa........eekeeeekdelkiekladnvyvhtsykevegvgkvssngLvvidekevvlvDtpwteeqtekLldwiekklklkvkavistHfHeDrlGGlealnkkgiktyasalTnellkkegkeqakhsfkkeekltlgkekievfypGegHtkDNiVvwlpkekiLfGGClvksaeakslGnlgdAnveeWpksvekvkakypeakiVipGHgevgdkellehTlklle	TISSvqasqkveQKVMKNEAGTISISQLNKNVWVHTELGYFNGE-AVPSNGLVLTTSKGLVLVDSSWDDKLTKELIEMVEKKFKKRVTDVIITHAHADRIGGIKTLKERGIKAHSTALTAALAKKNGYEEPLGDLQTVTNLKFGNMKVETFYPGKGHTGDNIVVWLPQYNILAGGCLVKSADAKDLGNVADAYVNEWSTSIENVLKRYRNINLVVPGHGEVGDRGLLLHTLDLLK	21	247	89.3281	8	1	0	257	Cluster_137	BcII_family_subclass_B1_metallo-beta-lactamase_NG_047224.1_cds_WP_012261328.1_1	Cluster_139	SP_Sec_SPI_	30-31	SP_Sec_SPI_	30-31	H_x_H_x_D	H_x_x_D_N	C	H	.
B1_124	GCF_002911905.1	132267	1428	Bacillus_thuringiensis_serovar_kumamtoensis	Bacteria-Terrabacteria_group-Bacillota-Bacilli-Bacillales-Bacillaceae-Bacillus-Bacillus_cereus_group-	6527750	NZ_PGDY01000079.1	class_B1	279.8	-	327618	328317	327616	328389	ATGAAAAAGAATACGTTGTTAAAAGTAGGATTATGTGTAGGTTTACTAGGAACAATTCAATTTGTTAGCACAATTTCTTCTGTACAAGCATCACAAAAGGTAGAGAAAACAGTAATAAAAAATGAGACGGGAACCATTTCAATATCTCAGTTAAACAAGAATGTATGGGTTCATACGGAGTTAGGTTCTTTTAATGGAGAAGCAGTTCCTTCGAACGGTCTAGTTCTTAATACTTCTAAAGGGTTAGTACTTGTGGATTCTTCTTGGGATGACAAATTAACGAAGGAACTAATAGAAATGGTAGAAAAGAAATTTCAGAAGCGCGTAACGGATGTCATTATTACACATGCGCACGCTGATCGAATTGGCGGAATAAAAACGTTGAAAGAAAGAGGCATT…	WP_000742468.1	BcII_family_subclass_B1_metallo-beta-lactamase	MKKNTLLKVGLCVGLLGTIQFVSTISSVQASQKVEKTVIKNETGTISISQLNKNVWVHTELGSFNGEAVPSNGLVLNTSKGLVLVDSSWDDKLTKELIEMVEKKFQKRVTDVIITHAHADRIGGIKTLKERGIKAHSTALTAELAKKNGYEEPLGDLQTVTNLKFGNMKVETFYPGKGHTEDNIVVWLPQYNILVGGCLVKSTSAKDLGNVADAYVNEWSTSIENVLKRYRNINAVVPGHGEVGDKGLLLHTLDLLK	ORF_OK	TRUE_HIT	lllslaaa........eekeeeekdelkiekladnvyvhtsykevegvgkvssngLvvidekevvlvDtpwteeqtekLldwiekklklkvkavistHfHeDrlGGlealnkkgiktyasalTnellkkegkeqakhsfkkeekltlgkekievfypGegHtkDNiVvwlpkekiLfGGClvksaeakslGnlgdAnveeWpksvekvkakypeakiVipGHgevgdkellehTlklle	TIS----SvqasqkveKTVIKNETGTISISQLNKNVWVHTELGSFNGE-AVPSNGLVLNTSKGLVLVDSSWDDKLTKELIEMVEKKFQKRVTDVIITHAHADRIGGIKTLKERGIKAHSTALTAELAKKNGYEEPLGDLQTVTNLKFGNMKVETFYPGKGHTEDNIVVWLPQYNILVGGCLVKSTSAKDLGNVADAYVNEWSTSIENVLKRYRNINAVVPGHGEVGDKGLLLHTLDLLK	17	247	90.9091	8	5	0	257	Cluster_137	BcII_family_subclass_B1_metallo-beta-lactamase_NG_047224.1_cds_WP_012261328.1_1	Cluster_139	SP_Sec_SPI_	30-31	SP_Sec_SPI_	30-31	H_x_H_x_D	H_x_x_D_N	C	H	.
B1_125	GCF_002911925.1	29338	1428	Bacillus_thuringiensis_serovar_galleriae	Bacteria-Terrabacteria_group-Bacillota-Bacilli-Bacillales-Bacillaceae-Bacillus-Bacillus_cereus_group-	5869577	NZ_PGDZ01000019.1	class_B1	279.4	+	23238	23937	23167	23940	ATGAAAAAGAATACGTTGTTAAAAGTAGGATTATGTGTAGGTTTACTAGGAACAATTCAATTTGTTAGCACAATTTCTTCTGTACAAGCATCACAAAAGGTAGAGAAAACAGTAATAAAAAATGAGACGGGAACCATTTCAATATCTCAGTTAAACAAGAATGTATGGGTTCATACGGAGTTAGGTTCTTTTAATGGAGAAGCAGTTCCTTCGAACGGTCTAGTTCTTAATACTTCTAAAGGGTTAGTACTTGTTGATTCTTCTTGGGATGACAAATTAACGAAGGAACTAATAGAAATGGTAGAAAAGAAGTTTCAGAAGCGTGTAACGGATGTCATTATTACACATGCGCACGCTGATCGAATTGGCGGAATAAAAACGTTGAAAGAAAGAGGAATT…	WP_000742473.1	BcII_family_subclass_B1_metallo-beta-lactamase	MKKNTLLKVGLCVGLLGTIQFVSTISSVQASQKVEKTVIKNETGTISISQLNKNVWVHTELGSFNGEAVPSNGLVLNTSKGLVLVDSSWDDKLTKELIEMVEKKFQKRVTDVIITHAHADRIGGIKTLKERGIKAHSTALTAELAKKSGYEEPLGDLQTVTNLKFGNMKVETFYPGKGHTEDNIVVWLPQYNILVGGCLVKSTSAKDLGNVADAYVNEWSTSIENVLKRYRNINVVVPGHGEVGNKGLLLYTLDLLK	ORF_OK	TRUE_HIT	lllslaaa........eekeeeekdelkiekladnvyvhtsykevegvgkvssngLvvidekevvlvDtpwteeqtekLldwiekklklkvkavistHfHeDrlGGlealnkkgiktyasalTnellkkegkeqakhsfkkeekltlgkekievfypGegHtkDNiVvwlpkekiLfGGClvksaeakslGnlgdAnveeWpksvekvkakypeakiVipGHgevgdkellehTlklle	TIS----SvqasqkveKTVIKNETGTISISQLNKNVWVHTELGSFNGE-AVPSNGLVLNTSKGLVLVDSSWDDKLTKELIEMVEKKFQKRVTDVIITHAHADRIGGIKTLKERGIKAHSTALTAELAKKSGYEEPLGDLQTVTNLKFGNMKVETFYPGKGHTEDNIVVWLPQYNILVGGCLVKSTSAKDLGNVADAYVNEWSTSIENVLKRYRNINVVVPGHGEVGNKGLLLYTLDLLK	17	247	90.9091	8	5	0	257	Cluster_137	BcII_family_subclass_B1_metallo-beta-lactamase_NG_047224.1_cds_WP_012261328.1_1	Cluster_139	SP_Sec_SPI_	30-31	SP_Sec_SPI_	30-31	H_x_H_x_D	H_x_x_D_N	C	H	.
B1_126	GCF_002911945.1	180882	1428	Bacillus_thuringiensis_serovar_monterrey	Bacteria-Terrabacteria_group-Bacillota-Bacilli-Bacillales-Bacillaceae-Bacillus-Bacillus_cereus_group-	6594082	NZ_PHSL01000093.1	class_B1	281.5	-	41028	41742	41026	41796	ATGAAAAATACATTATTAAAATTAGGGGTATGTGTTAGTTTACTAGGAATAACTCCATTTGTTAGTACAATTTCTTCTGTACAAGCAGAACGAACGGTAGAGCATAAAGTAATAAAAAATGAGACAGGAACTATTTCAATTTCTCAGTTAAACAAAAATGTTTGGGTTCATACGGAGTTAGGTTATTTTAACGGAGAAGCAGTTCCTTCAAACGGTTTAATCCTTAATACTTCTAAAGGATTAGTACTTGTCGATTCTTCTTGGGATGATAAGTTAACGAAGGAATTAATAGAGATGGCAGAAAAGAAATTTAAGAAGAGTGTAACGGATGTTATTATTACACATGCACACGCTGATCGGATTGGTGGAATAAAAACGTTGAAAGAAAGAGGCATTAAA…	WP_000799230.1	BcII_family_subclass_B1_metallo-beta-lactamase	MKNTLLKLGVCVSLLGITPFVSTISSVQAERTVEHKVIKNETGTISISQLNKNVWVHTELGYFNGEAVPSNGLILNTSKGLVLVDSSWDDKLTKELIEMAEKKFKKSVTDVIITHAHADRIGGIKTLKERGIKTHSTTLTAELAKKNGYEEPLGDLQAITKLKFGNMKVETFYPGKGHTEDNIVVWLPQYNMLVGGCLVKSASAKDLGNITDAYVNEWSTSIENVLKRYENINFVVPGHGEVGDKGLLLHTLDLLK	ORF_OK	TRUE_HIT	llllslaaa........eekeeeekdelkiekladnvyvhtsykevegvgkvssngLvvidekevvlvDtpwteeqtekLldwiekklklkvkavistHfHeDrlGGlealnkkgiktyasalTnellkkegkeqakhsfkkeekltlgkekievfypGegHtkDNiVvwlpkekiLfGGClvksaeakslGnlgdAnveeWpksvekvkakypeakiVipGHgevgdkellehTlklle	TPFVSTISSvqaertveHKVIKNETGTISISQLNKNVWVHTELGYFNGE-AVPSNGLILNTSKGLVLVDSSWDDKLTKELIEMAEKKFKKSVTDVIITHAHADRIGGIKTLKERGIKTHSTTLTAELAKKNGYEEPLGDLQAITKLKFGNMKVETFYPGKGHTEDNIVVWLPQYNMLVGGCLVKSASAKDLGNITDAYVNEWSTSIENVLKRYENINFVVPGHGEVGDKGLLLHTLDLLK	16	247	91.3043	8	1	0	256	Cluster_137	BcII_family_subclass_B1_metallo-beta-lactamase_NG_047224.1_cds_WP_012261328.1_1	Cluster_139	SP_Sec_SPI_	29-30	SP_Sec_SPI_	29-30	H_x_H_x_D	H_x_x_D_N	C	H	.
B1_127	GCF_002911955.1	1436	1428	Bacillus_thuringiensis_serovar_entomocidus	Bacteria-Terrabacteria_group-Bacillota-Bacilli-Bacillales-Bacillaceae-Bacillus-Bacillus_cereus_group-	6137567	NZ_PGEB01000235.1	class_B1	279.4	+	84951	85659	84889	85662	ATGAAAAAGAATACGTTGTTAAAAGTAGGATTATGTGTAAGTTTACTAGGAACAACTCAATTTGTTAGCACGATTTCTTCTGCACAAGCATCACAAAAGGTAGAGCAAACAGTAATCAAAAATGAGACGGGAACCATTTCAATATCTCAGTTAAACAAGAATGTATGGGTTCATACGGAGTTAGGTTATTTTAATGGAGAAGCAGTTCCTTCGAACGGTCTAGTTCTTAATACTGCTAAAGGACTAGTGCTTGTTGATTCTTCTTGGGATGACAAATTAACGAAGGAACTAATAGAAATGGTAGAAAAGAAATTTCAGAAGCGCGTAACGGATGTCATTATTACACATGCGCACGCCGATCGAATTGGCGGAATAAAAACGTTGAAAGAAAGAGGAATT…	WP_086412733.1	BcII_family_subclass_B1_metallo-beta-lactamase	MKKNTLLKVGLCVSLLGTTQFVSTISSAQASQKVEQTVIKNETGTISISQLNKNVWVHTELGYFNGEAVPSNGLVLNTAKGLVLVDSSWDDKLTKELIEMVEKKFQKRVTDVIITHAHADRIGGIKTLKERGIKAHSTALTAELAKKSGYEEPLGDLQTVTNLKFGNTKVETFYPGKGHTEDNIVVWLPQYKILAGGCLVKSAEAKNLGNVADAYVNEWSTSIENMLKRYGNINSVVPGHGEVGDKGLLLHTLDLLK	ORF_OK	TRUE_HIT	llslaaa........eekeeeekdelkiekladnvyvhtsykevegvgkvssngLvvidekevvlvDtpwteeqtekLldwiekklklkvkavistHfHeDrlGGlealnkkgiktyasalTnellkkegkeqakhsfkkeekltlgkekievfypGegHtkDNiVvwlpkekiLfGGClvksaeakslGnlgdAnveeWpksvekvkakypeakiVipGHgevgdkellehTlklle	FVSTISSaqasqkveQTVIKNETGTISISQLNKNVWVHTELGYFNGE-AVPSNGLVLNTAKGLVLVDSSWDDKLTKELIEMVEKKFQKRVTDVIITHAHADRIGGIKTLKERGIKAHSTALTAELAKKSGYEEPLGDLQTVTNLKFGNTKVETFYPGKGHTEDNIVVWLPQYKILAGGCLVKSAEAKNLGNVADAYVNEWSTSIENMLKRYGNINSVVPGHGEVGDKGLLLHTLDLLK	18	247	90.5138	8	1	0	257	Cluster_137	BcII_family_subclass_B1_metallo-beta-lactamase_NG_047224.1_cds_WP_012261328.1_1	Cluster_139	SP_Sec_SPI_	30-31	SP_Sec_SPI_	30-31	H_x_H_x_D	H_x_x_D_N	C	H	.
B1_130	GCF_002912045.1	132266	1428	Bacillus_thuringiensis_serovar_higo	Bacteria-Terrabacteria_group-Bacillota-Bacilli-Bacillales-Bacillaceae-Bacillus-Bacillus_cereus_group-	6173834	NZ_PGSA01000096.1	class_B1	276.4	-	17361	18069	17359	18132	ATGAAAAAGAATACGTTGTTAAAAGTAGGATTATGTGTAAGTTTACTAGGAACAACTCAATTTGTTAGCACGATTTCTTCTGTACAAGCATCACAAAAGGTAGAGCAAAAAGTAATAAAAAATGAGACGGGAACCATTTCAATATCTCAGTTAAACAAGAATGTATGGGTTCATACGGAGTTAGGTTATTTTAATGGAGAAGCAGTTCCTTCGAACGGTCTAGTTCTTAATACTTCTAAAGGTTTAGTACTTGTTGATTCTTCTTGGGATGATAAATTAACGAAGGAACTAATAGAAATGGTAGAAAAGAAATTTCAGAAGTGCGTAACGGATGTCATTATTACACATGCGCACGCTGATCGAATTGGCGGAATAACAGCGTTGAAAGAAAGAGGCATT…	WP_088114172.1	BcII_family_subclass_B1_metallo-beta-lactamase	MKKNTLLKVGLCVSLLGTTQFVSTISSVQASQKVEQKVIKNETGTISISQLNKNVWVHTELGYFNGEAVPSNGLVLNTSKGLVLVDSSWDDKLTKELIEMVEKKFQKCVTDVIITHAHADRIGGITALKERGIKAHSTALTAELAKKSGYEEPLGDLQTITSLKFGNTKVETFYPGKGHTEDNIVVWLPQYQILAGGCLVKSAEAKDLGNVADSYVNEWSTSIENVLKRYGNINSVVPGHGEVGDKGLLLHTLDLLK	ORF_OK	TRUE_HIT	llslaaa........eekeeeekdelkiekladnvyvhtsykevegvgkvssngLvvidekevvlvDtpwteeqtekLldwiekklklkvkavistHfHeDrlGGlealnkkgiktyasalTnellkkegkeqakhsfkkeekltlgkekievfypGegHtkDNiVvwlpkekiLfGGClvksaeakslGnlgdAnveeWpksvekvkakypeakiVipGHgevgdkellehTlklle	FVSTISSvqasqkveQKVIKNETGTISISQLNKNVWVHTELGYFNGE-AVPSNGLVLNTSKGLVLVDSSWDDKLTKELIEMVEKKFQKCVTDVIITHAHADRIGGITALKERGIKAHSTALTAELAKKSGYEEPLGDLQTITSLKFGNTKVETFYPGKGHTEDNIVVWLPQYQILAGGCLVKSAEAKDLGNVADSYVNEWSTSIENVLKRYGNINSVVPGHGEVGDKGLLLHTLDLLK	18	247	90.5138	8	1	0	257	Cluster_137	BcII_family_subclass_B1_metallo-beta-lactamase_NG_047224.1_cds_WP_012261328.1_1	Cluster_139	SP_Sec_SPI_	30-31	SP_Sec_SPI_	30-31	H_x_H_x_D	H_x_x_D_N	C	H	.
B1_133	GCF_002912105.1	29339	1428	Bacillus_thuringiensis_serovar_kurstaki	Bacteria-Terrabacteria_group-Bacillota-Bacilli-Bacillales-Bacillaceae-Bacillus-Bacillus_cereus_group-	6842717	NZ_PGEH01000164.1	class_B1	277.6	-	66030	66729	66028	66801	ATGAAAAAGAATACGTTGTTAAAAGTAGGATTATGTGTAGGTTTACTAGGAACAATTCAATTTGTTAGCACAATTTCTTCTGTACAAGCATCACAAAAGGTAGAGAAAACAGTAATAAAAAATGAGACGGGAACCATTTCAATATCTCAGTTAAACAAGAATGTATGGGTTCATACGGAGTTAGGTTCTTTTAATGGAGAAGCAGTTCCTTCGAACGGTCTAGTTCTTAATACTTCTAAAGGGTTAGTACTTGTTGATTCTTCTTGGGATGACAAATTAACGAAGGAACTAATAGAAATGGTAGAAAAGAAGTTTCAGAAGCGTGTAACGGATGTCATTATTACACATGCGCACGCTGATCGAATTGGCGGAATAAAAACGTTGAAAGAAAGAGGAATT…	WP_000742473.1	BcII_family_subclass_B1_metallo-beta-lactamase	MKKNTLLKVGLCVGLLGTIQFVSTISSVQASQKVEKTVIKNETGTISISQLNKNVWVHTELGSFNGEAVPSNGLVLNTSKGLVLVDSSWDDKLTKELIEMVEKKFQKRVTDVIITHAHADRIGGIKTLKERGIKAHSTALTAELAKKSGYEEPLGDLQTVTNLKFGNMKVETFYPGKGHTEDNIVVWLPQYNILVGGCLVKSTSAKDLGNVADAYVNEWSTSIENVLKRYRNINVVVPGHGEVGNKGLLLYTLDLLK	ORF_OK	TRUE_HIT	lllslaaa........eekeeeekdelkiekladnvyvhtsykevegvgkvssngLvvidekevvlvDtpwteeqtekLldwiekklklkvkavistHfHeDrlGGlealnkkgiktyasalTnellkkegkeqakhsfkkeekltlgkekievfypGegHtkDNiVvwlpkekiLfGGClvksaeakslGnlgdAnveeWpksvekvkakypeakiVipGHgevgdkellehTlklle	TIS----SvqasqkveKTVIKNETGTISISQLNKNVWVHTELGSFNGE-AVPSNGLVLNTSKGLVLVDSSWDDKLTKELIEMVEKKFQKRVTDVIITHAHADRIGGIKTLKERGIKAHSTALTAELAKKSGYEEPLGDLQTVTNLKFGNMKVETFYPGKGHTEDNIVVWLPQYNILVGGCLVKSTSAKDLGNVADAYVNEWSTSIENVLKRYRNINVVVPGHGEVGNKGLLLYTLDLLK	17	247	90.9091	8	5	0	257	Cluster_137	BcII_family_subclass_B1_metallo-beta-lactamase_NG_047224.1_cds_WP_012261328.1_1	Cluster_139	SP_Sec_SPI_	30-31	SP_Sec_SPI_	30-31	H_x_H_x_D	H_x_x_D_N	C	H	.
B1_134	GCF_002912115.1	1434	1428	Bacillus_thuringiensis_serovar_berliner	Bacteria-Terrabacteria_group-Bacillota-Bacilli-Bacillales-Bacillaceae-Bacillus-Bacillus_cereus_group-	6271497	NZ_PHSK01000001.1	class_B1	271.7	-	3401137	3401842	3401135	3401908	ATGAAAAAGAATACGTTGTTAAAAGTAGGATTATGTGTAAGTTTACTAGGAACAACTCAATTTGTTAGCACGATTTCTTCTGCACAAGCATCACAAAAGGTAGAGCAAATAGTAATCAAAAATGAGACGGGAACCATTTCAATATCTCAGTTAAACAAGAATGTATGGGTTCATACGGAGTTAGGTTATTTTAATGGAGAAGCAGTTCCTTCGAACGGTCTAGTTCTTAATACTTCTAAAGGGTTAGTACTTGTTGATTCTTCTTGGGATAACAAATTAACGAAGGAACTAATAGAAATGGTAGAAAAGAAATTTCAGAAGCGCGTAACAGATGTCATTATTACACATGCGCACGCTGATCGAATTGGCGGAATAACAGCGTTGAAAGAAAGAGGCATT…	WP_000742481.1	BcII_family_subclass_B1_metallo-beta-lactamase	MKKNTLLKVGLCVSLLGTTQFVSTISSAQASQKVEQIVIKNETGTISISQLNKNVWVHTELGYFNGEAVPSNGLVLNTSKGLVLVDSSWDNKLTKELIEMVEKKFQKRVTDVIITHAHADRIGGITALKERGIKAHSTALTAELAKNSGYEEPLGDLQTITSLKFGNTKVETFYPGKGHTEDNIVVWLPQYQILAGGCLVKSAEAKDLGNVADAYVNEWSTSIENVLKRYGNINSVVPGHGEVGDKGLLLHTLDLLK	ORF_OK	TRUE_HIT	lslaaa........eekeeeekdelkiekladnvyvhtsykevegvgkvssngLvvidekevvlvDtpwteeqtekLldwiekklklkvkavistHfHeDrlGGlealnkkgiktyasalTnellkkegkeqakhsfkkeekltlgkekievfypGegHtkDNiVvwlpkekiLfGGClvksaeakslGnlgdAnveeWpksvekvkakypeakiVipGHgevgdkellehTlklle	VSTISSaqasqkveQIVIKNETGTISISQLNKNVWVHTELGYFNGE-AVPSNGLVLNTSKGLVLVDSSWDNKLTKELIEMVEKKFQKRVTDVIITHAHADRIGGITALKERGIKAHSTALTAELAKNSGYEEPLGDLQTITSLKFGNTKVETFYPGKGHTEDNIVVWLPQYQILAGGCLVKSAEAKDLGNVADAYVNEWSTSIENVLKRYGNINSVVPGHGEVGDKGLLLHTLDLLK	19	247	90.1186	8	1	0	257	Cluster_137	BcII_family_subclass_B1_metallo-beta-lactamase_NG_047224.1_cds_WP_012261328.1_1	Cluster_139	SP_Sec_SPI_	30-31	SP_Sec_SPI_	30-31	H_x_H_x_D	H_x_x_D_N	C	H	.
B1_136	GCF_002912215.1	29339	1428	Bacillus_thuringiensis_serovar_kurstaki	Bacteria-Terrabacteria_group-Bacillota-Bacilli-Bacillales-Bacillaceae-Bacillus-Bacillus_cereus_group-	5985854	NZ_PHSM01000001.1	class_B1	272.3	-	3537174	3537873	3537172	3537945	ATGAAAAAGAATACGTTGTTAAAAGTAGGATTATGTGTAGGTTTACTAGGAACAATTCAATTTGTTAGCACAATTTCTTCTGTACAAGCATCACAAAAGGTAGAGAAAACAGTAATAAAAAATGAGACGGGAACCATTTCAATATCTCAGTTAAACAAGAATGTATGGGTTCATACGGAGTTAGGTTCTTTTAATGGAGAAGCAGTTCCTTCGAACGGTCTAGTTCTTAATACTTCTAAAGGGTTAGTACTTGTTGATTCTTCTTGGGATGACAAATTAACGAAGGAACTAATAGAAATGGTAGAAAAGAAGTTTCAGAAGCGTGTAACGGATGTCATTATTACACATGCGCACGCTGATCGAATTGGCGGAATAAAAACGTTGAAAGAAAGAGGAATT…	WP_000742473.1	BcII_family_subclass_B1_metallo-beta-lactamase	MKKNTLLKVGLCVGLLGTIQFVSTISSVQASQKVEKTVIKNETGTISISQLNKNVWVHTELGSFNGEAVPSNGLVLNTSKGLVLVDSSWDDKLTKELIEMVEKKFQKRVTDVIITHAHADRIGGIKTLKERGIKAHSTALTAELAKKSGYEEPLGDLQTVTNLKFGNMKVETFYPGKGHTEDNIVVWLPQYNILVGGCLVKSTSAKDLGNVADAYVNEWSTSIENVLKRYRNINVVVPGHGEVGNKGLLLYTLDLLK	ORF_OK	TRUE_HIT	lllslaaa........eekeeeekdelkiekladnvyvhtsykevegvgkvssngLvvidekevvlvDtpwteeqtekLldwiekklklkvkavistHfHeDrlGGlealnkkgiktyasalTnellkkegkeqakhsfkkeekltlgkekievfypGegHtkDNiVvwlpkekiLfGGClvksaeakslGnlgdAnveeWpksvekvkakypeakiVipGHgevgdkellehTlklle	TIS----SvqasqkveKTVIKNETGTISISQLNKNVWVHTELGSFNGE-AVPSNGLVLNTSKGLVLVDSSWDDKLTKELIEMVEKKFQKRVTDVIITHAHADRIGGIKTLKERGIKAHSTALTAELAKKSGYEEPLGDLQTVTNLKFGNMKVETFYPGKGHTEDNIVVWLPQYNILVGGCLVKSTSAKDLGNVADAYVNEWSTSIENVLKRYRNINVVVPGHGEVGNKGLLLYTLDLLK	17	247	90.9091	8	5	0	257	Cluster_137	BcII_family_subclass_B1_metallo-beta-lactamase_NG_047224.1_cds_WP_012261328.1_1	Cluster_139	SP_Sec_SPI_	30-31	SP_Sec_SPI_	30-31	H_x_H_x_D	H_x_x_D_N	C	H	.
B1_137	GCF_002916875.1	492670	492670	Bacillus_velezensis	Bacteria-Terrabacteria_group-Bacillota-Bacilli-Bacillales-Bacillaceae-Bacillus-Bacillus_subtilis_group-Bacillus_amyloliquefaciens_group-	3879012	NZ_NEOS01000001.1	class_B1	230.9	+	117195	117888	117205	117894	ATGAAACCGGCAGACGCGGCGGAGAGCTCCGCAGCAAAAGATGTCACTCTCACACAGCTAGCGCCGCATGTCTGGATGCATACAAGCACCGGTACGGCAGACGGAAGTCCCGTCCCTGCGAACGGATTGCTTCTTGAGACTTCCAAAGGAATCGTACTGATTGACACTCCGTGGAATGACAGTCTCACAGAGCAGTTAATGACACAAATAAAACAGCGGTTTCCCGGCAAAAGGATGACCGATGCCATTGTGACACACGCTCATGACGATCGTATCGGCGGGCTGAACACCCTGTATACATACGGTGTAAAGGTGCACAGCACGAAGCTGACCGCCGACTTGGCCCGGCAGCAGGGATATGACCGGCCGCTCGGAGATTTGAAAAACGTGACAAAGCTG…	WP_039062911.1	subclass_B1_metallo-beta-lactamase	MKPADAAESSAAKDVTLTQLAPHVWMHTSTGTADGSPVPANGLLLETSKGIVLIDTPWNDSLTEQLMTQIKQRFPGKRMTDAIVTHAHDDRIGGLNTLYTYGVKVHSTKLTADLARQQGYDRPLGDLKNVTKLQFGDMKIETFYPGKGHTEDNMTVWLPEEKLLFGGCLIKALETKEIVPTPGFYPDQWPRAVRKVMKRYQDISIVVPGHGSPGDDRLLPHTISLLKET	ORF_OK	TRUE_HIT	lllslaaaeekeeeekdelkiekladnvyvhtsykevegvgkvssngLvvidekevvlvDtpwteeqtekLldwiekkl.klkvkavistHfHeDrlGGlealnkkgiktyasalTnellkkegkeqakhsfkkeekltlgkekievfypGegHtkDNiVvwlpkekiLfGGClvksaeakslGnlgdAnveeWpksvekvkakypeakiVipGHgevgdkellehTlkllek	FTAGMKPADAAESSAAKDVTLTQLAPHVWMHTSTGTADGS-PVPANGLLLETSKGIVLIDTPWNDSLTEQLMTQIKQRFpGKRMTDAIVTHAHDDRIGGLNTLYTYGVKVHSTKLTADLARQQGYDRPLGDLKNVTKLQFGDMKIETFYPGKGHTEDNMTVWLPEEKLLFGGCLIKALETKEIVPTPGFYPDQWPRAVRKVMKRYQDISIVVPGHGSPGDDRLLPHTISLLKE	17	248	91.3043	1	1	0	229	Cluster_1171	CLUSTER_NOT_IN_NCBI_AMR_REF_DB	Cluster_1151	OTHER	0	OTHER	0	H_x_H_x_D	H_x_x_D_N	C	H	.
B1_138	GCF_002918965.1	1985874	1985874	Acinetobacter_sp_ACNIH3	Bacteria-Pseudomonadota-Gammaproteobacteria-Moraxellales-Moraxellaceae-Acinetobacter-unclassified_Acinetobacter-	3463366	NZ_PQLP01000031.1	class_B1	269.9	+	351	1119	316	1128	ATGGAATTGCCCAATATTATGCACCCGGTCGCGAAGCTGAGCACCGCATTAGCCGCTGCATTGATGCTGAGCGGGTGCATGCCCGGTGAAATCCGCCCGACGATTGGCCAGCAAATGGAAACTGGCGACCAACGGTTTGGCGATCTGGTTTTCCGCCAGCTCGCACCGAATGTCTGGCAGCACACTTCCTATCTCGACATGCCGGGTTTCGGGGCAGTCGCTTCCAACGGTTTGATCGTCAGGGATGGCGGCCGCGTGCTGGTGGTCGATACCGCCTGGACCGATGACCAGACCGCCCAGATCCTCAACTGGATCAAGCAGGAGATCAACCTGCCGGTCGCGCTGGCGGTGGTGACTCACGCGCATCAGGACAAGATGGGCGGTATGGACGCGCTGCAT…	WP_004201164.1	subclass_B1_metallo-beta-lactamase_NDM-1	MELPNIMHPVAKLSTALAAALMLSGCMPGEIRPTIGQQMETGDQRFGDLVFRQLAPNVWQHTSYLDMPGFGAVASNGLIVRDGGRVLVVDTAWTDDQTAQILNWIKQEINLPVALAVVTHAHQDKMGGMDALHAAGIATYANALSNQLAPQEGMVAAQHSLTFAANGWVEPATAPNFGPLKVFYPGPGHTSDNITVGIDGTDIAFGGCLIKDSKAKSLGNLGDADTEHYAASARAFGAAFPKASMIVMSHSAPDSRAAITHTARMADKLR	ORF_OK	TRUE_HIT	kllllllllllllslaaa.........eekeeeekdelkiekladnvyvhtsykevegvgkvssngLvvidekevvlvDtpwteeqtekLldwiekklklkvkavistHfHeDrlGGlealnkkgiktyasalTnellkkegkeqakhsfkkeek......ltlgkekievfypGegHtkDNiVvwlpkekiLfGGClvksaeakslGnlgdAnveeWpksvekvkakypeakiVipGHgevgdkellehTlkllek	KLSTALAAALMLSGCMPGeirptigqqMETGDQRFGDLVFRQLAPNVWQHTSYLDMPGFGAVASNGLIVRDGGRVLVVDTAWTDDQTAQILNWIKQEINLPVALAVVTHAHQDKMGGMDALHAAGIATYANALSNQLAPQEGMVAAQHSLTFAANgwvepaTAPNFGPLKVFYPGPGHTSDNITVGIDGTDIAFGGCLIKDSKAKSLGNLGDADTEHYAASARAFGAAFPKASMIVMSHSAPDSRAAITHTARMADK	7	248	95.2569	15	0	0	270	Cluster_118	subclass_B1_metallo-beta-lactamase_NDM-18_NG_052866.1_cds_WP_077064890.1_1	Cluster_120	LIPO_Sec_SPII_	25-26	LIPO_Sec_SPII_	25-26	H_x_H_x_D	H_x_x_D_N	C	H	.
B1_139	GCF_002919885.1	1985875	1985875	Acinetobacter_sp_ACNIH4	Bacteria-Pseudomonadota-Gammaproteobacteria-Moraxellales-Moraxellaceae-Acinetobacter-unclassified_Acinetobacter-	3446532	NZ_PQLO01000046.1	class_B1	270.5	+	351	1119	316	1128	ATGGAATTGCCCAATATTATGCACCCGGTCGCGAAGCTGAGCACCGCATTAGCCGCTGCATTGATGCTGAGCGGGTGCATGCCCGGTGAAATCCGCCCGACGATTGGCCAGCAAATGGAAACTGGCGACCAACGGTTTGGCGATCTGGTTTTCCGCCAGCTCGCACCGAATGTCTGGCAGCACACTTCCTATCTCGACATGCCGGGTTTCGGGGCAGTCGCTTCCAACGGTTTGATCGTCAGGGATGGCGGCCGCGTGCTGGTGGTCGATACCGCCTGGACCGATGACCAGACCGCCCAGATCCTCAACTGGATCAAGCAGGAGATCAACCTGCCGGTCGCGCTGGCGGTGGTGACTCACGCGCATCAGGACAAGATGGGCGGTATGGACGCGCTGCAT…	WP_004201164.1	subclass_B1_metallo-beta-lactamase_NDM-1	MELPNIMHPVAKLSTALAAALMLSGCMPGEIRPTIGQQMETGDQRFGDLVFRQLAPNVWQHTSYLDMPGFGAVASNGLIVRDGGRVLVVDTAWTDDQTAQILNWIKQEINLPVALAVVTHAHQDKMGGMDALHAAGIATYANALSNQLAPQEGMVAAQHSLTFAANGWVEPATAPNFGPLKVFYPGPGHTSDNITVGIDGTDIAFGGCLIKDSKAKSLGNLGDADTEHYAASARAFGAAFPKASMIVMSHSAPDSRAAITHTARMADKLR	ORF_OK	TRUE_HIT	kllllllllllllslaaa.........eekeeeekdelkiekladnvyvhtsykevegvgkvssngLvvidekevvlvDtpwteeqtekLldwiekklklkvkavistHfHeDrlGGlealnkkgiktyasalTnellkkegkeqakhsfkkeek......ltlgkekievfypGegHtkDNiVvwlpkekiLfGGClvksaeakslGnlgdAnveeWpksvekvkakypeakiVipGHgevgdkellehTlkllek	KLSTALAAALMLSGCMPGeirptigqqMETGDQRFGDLVFRQLAPNVWQHTSYLDMPGFGAVASNGLIVRDGGRVLVVDTAWTDDQTAQILNWIKQEINLPVALAVVTHAHQDKMGGMDALHAAGIATYANALSNQLAPQEGMVAAQHSLTFAANgwvepaTAPNFGPLKVFYPGPGHTSDNITVGIDGTDIAFGGCLIKDSKAKSLGNLGDADTEHYAASARAFGAAFPKASMIVMSHSAPDSRAAITHTARMADK	7	248	95.2569	15	0	0	270	Cluster_118	subclass_B1_metallo-beta-lactamase_NDM-18_NG_052866.1_cds_WP_077064890.1_1	Cluster_120	LIPO_Sec_SPII_	25-26	LIPO_Sec_SPII_	25-26	H_x_H_x_D	H_x_x_D_N	C	H	.
B1_14	GCF_002845365.1	492670	492670	Bacillus_velezensis	Bacteria-Terrabacteria_group-Bacillota-Bacilli-Bacillales-Bacillaceae-Bacillus-Bacillus_subtilis_group-Bacillus_amyloliquefaciens_group-	3928489	NZ_CP025341.1	class_B1	227.7	+	1144873	1145578	1144835	1145584	TTGAGAAAGCTTTCATTATTAATTGCGGGGTTATTTCTATTCGGCCTCTTTACTGCCGGAATGAAACCGGCACACGCGGCGGAGAGCTCCGCAGCAAAAGATGTCACTCTTACACAGCTGGCGCCGCATGTCTGGATGCATACAAGCATCGGTACGGCAGACGGAAGTCCCGTCGCTGCGAACGGATTGCTTCTTGAAACTTCCAAAGGAATCGTACTGATTGATACTCCGTGGAATGACAGTCTCGCAGAGCAATTAATGACACAAATAAAACAGCGGTTTCCCGGCAAAAGGATGACCGATGCCATTGTGACACACGCCCATGACGATCGCATCGGCGGGCTGAACGCACTGTACAAATACGGTGTAAAGGTGCACAGCACGAAGCTGACCGCCGAC…	WP_063174615.1	subclass_B1_metallo-beta-lactamase	MRKLSLLIAGLFLFGLFTAGMKPAHAAESSAAKDVTLTQLAPHVWMHTSIGTADGSPVAANGLLLETSKGIVLIDTPWNDSLAEQLMTQIKQRFPGKRMTDAIVTHAHDDRIGGLNALYKYGVKVHSTKLTADFARQQGYDRPLGDLKNVTKLQFGDMKIETFYPGKGHTEDNITVWLPEDKLLFGGCLIKALETKEIIPTPGFYPDQWPRAVRKVMKRYQDISIVVPGHGSPGDDRLLPHTISLLKET	ORF_OK	TRUE_HIT	lllllllslaaaeekeeeekdelkiekladnvyvhtsykevegvgkvssngLvvidekevvlvDtpwteeqtekLldwiekkl.klkvkavistHfHeDrlGGlealnkkgiktyasalTnellkkegkeqakhsfkkeekltlgkekievfypGegHtkDNiVvwlpkekiLfGGClvksaeakslGnlgdAnveeWpksvekvkakypeakiVipGHgevgdkellehTlkllek	LFGLFTAGMKPAHAAESSAAKDVTLTQLAPHVWMHTSIGTADGS-PVAANGLLLETSKGIVLIDTPWNDSLAEQLMTQIKQRFpGKRMTDAIVTHAHDDRIGGLNALYKYGVKVHSTKLTADFARQQGYDRPLGDLKNVTKLQFGDMKIETFYPGKGHTEDNITVWLPEDKLLFGGCLIKALETKEIIPTPGFYPDQWPRAVRKVMKRYQDISIVVPGHGSPGDDRLLPHTISLLKE	13	248	92.8854	1	1	0	249	Cluster_210	CLUSTER_NOT_IN_NCBI_AMR_REF_DB	Cluster_216	SP_Sec_SPI_	26-27	SP_Sec_SPI_	26-27	H_x_H_x_D	H_x_x_D_N	C	H	.
B1_140	GCF_002919905.1	2080673	2080673	Acinetobacter_sp_ABNIH27	Bacteria-Pseudomonadota-Gammaproteobacteria-Moraxellales-Moraxellaceae-Acinetobacter-Acinetobacter_calcoaceticus_baumannii_complex-unclassified_Acinetobacter_calcoaceticus_baumannii_complex-	4060087	NZ_PQLQ01000047.1	class_B1	270.3	+	351	1119	316	1128	ATGGAATTGCCCAATATTATGCACCCGGTCGCGAAGCTGAGCACCGCATTAGCCGCTGCATTGATGCTGAGCGGGTGCATGCCCGGTGAAATCCGCCCGACGATTGGCCAGCAAATGGAAACTGGCGACCAACGGTTTGGCGATCTGGTTTTCCGCCAGCTCGCACCGAATGTCTGGCAGCACACTTCCTATCTCGACATGCCGGGTTTCGGGGCAGTCGCTTCCAACGGTTTGATCGTCAGGGATGGCGGCCGCGTGCTGGTGGTCGATACCGCCTGGACCGATGACCAGACCGCCCAGATCCTCAACTGGATCAAGCAGGAGATCAACCTGCCGGTCGCGCTGGCGGTGGTGACTCACGCGCATCAGGACAAGATGGGCGGTATGGACGCGCTGCAT…	WP_004201164.1	subclass_B1_metallo-beta-lactamase_NDM-1	MELPNIMHPVAKLSTALAAALMLSGCMPGEIRPTIGQQMETGDQRFGDLVFRQLAPNVWQHTSYLDMPGFGAVASNGLIVRDGGRVLVVDTAWTDDQTAQILNWIKQEINLPVALAVVTHAHQDKMGGMDALHAAGIATYANALSNQLAPQEGMVAAQHSLTFAANGWVEPATAPNFGPLKVFYPGPGHTSDNITVGIDGTDIAFGGCLIKDSKAKSLGNLGDADTEHYAASARAFGAAFPKASMIVMSHSAPDSRAAITHTARMADKLR	ORF_OK	TRUE_HIT	kllllllllllllslaaa.........eekeeeekdelkiekladnvyvhtsykevegvgkvssngLvvidekevvlvDtpwteeqtekLldwiekklklkvkavistHfHeDrlGGlealnkkgiktyasalTnellkkegkeqakhsfkkeek......ltlgkekievfypGegHtkDNiVvwlpkekiLfGGClvksaeakslGnlgdAnveeWpksvekvkakypeakiVipGHgevgdkellehTlkllek	KLSTALAAALMLSGCMPGeirptigqqMETGDQRFGDLVFRQLAPNVWQHTSYLDMPGFGAVASNGLIVRDGGRVLVVDTAWTDDQTAQILNWIKQEINLPVALAVVTHAHQDKMGGMDALHAAGIATYANALSNQLAPQEGMVAAQHSLTFAANgwvepaTAPNFGPLKVFYPGPGHTSDNITVGIDGTDIAFGGCLIKDSKAKSLGNLGDADTEHYAASARAFGAAFPKASMIVMSHSAPDSRAAITHTARMADK	7	248	95.2569	15	0	0	270	Cluster_118	subclass_B1_metallo-beta-lactamase_NDM-18_NG_052866.1_cds_WP_077064890.1_1	Cluster_120	LIPO_Sec_SPII_	25-26	LIPO_Sec_SPII_	25-26	H_x_H_x_D	H_x_x_D_N	C	H	.
B1_141	GCF_002920915.1	2079460	2079460	Solitalea_longa	Bacteria-FCB_group-Bacteroidota_Chlorobiota_group-Bacteroidota-Sphingobacteriia-Sphingobacteriales-Sphingobacteriaceae-Solitalea-	4517600	NZ_PQVF01000001.1	class_B1	268.1	+	526067	526781	526065	526799	ATGAAAACCATAATTACGCTGGCATTTACCTCCATTCTACTAGCTTGCTTTAATCAGCAAAAACCGGCCGAAGGTTTAAAGATTACTCACCTTACCGGTGATTTTTATGTGTATACCACTTACAAAAACTTTGGTGGTACTATTATCCCATCAAACAGTATGTACTTGCTGACCAAAGCCGGCGTGGTAATGTTTGATACACCCTGGGATACTACCCAATTTCAACCTTTACTCGATAGCATTGAAAAACGACATCATCAGAAAGTGGTGTTGGCCATTTCTACCCATTATCACGCTGATCGTACTGCAGGACTGGAGTTTTTAAAATACCGAGGAGTTAAAACCTATACCTCAAAACAAACCTACGACTTGTGCAAAACGCATAACGAAAAGCAGCCT…	WP_103787474.1	BlaB_IND_MUS_family_subclass_B1_metallo-beta-lactamase	MKTIITLAFTSILLACFNQQKPAEGLKITHLTGDFYVYTTYKNFGGTIIPSNSMYLLTKAGVVMFDTPWDTTQFQPLLDSIEKRHHQKVVLAISTHYHADRTAGLEFLKYRGVKTYTSKQTYDLCKTHNEKQPQYYFINDTTFTVGEHRFTTFYPGAGHTKDNIVIWYPKEKILYGGCFVKSTESPDLGNVADADVKAWPTSVKNVMKKCPAPRFIIPGHFSWENPKSLDYTLQLLKDYKPGDK	ORF_OK	TRUE_HIT	lrkllllllllllllslaaaeekeeeekdelkiekladnvyvhtsykevegvgkvssngLvvidekevvlvDtpwteeqtekLldwiekklklkvkavistHfHeDrlGGlealnkkgiktyasalTnellkkegkeqakhsfkkeekltlgkekievfypGegHtkDNiVvwlpkekiLfGGClvksaeakslGnlgdAnveeWpksvekvkakypeakiVipGHgevgdkellehTlklleka	MKT-IITLAFTSILLACF----NQQKPAEGLKITHLTGDFYVYTTYKNFGGT-IIPSNSMYLLTKAGVVMFDTPWDTTQFQPLLDSIEKRHHQKVVLAISTHYHADRTAGLEFLKYRGVKTYTSKQTYDLCKTHNEKQPQYYFINDTTFTVGEHRFTTFYPGAGHTKDNIVIWYPKEKILYGGCFVKSTESPDLGNVADADVKAWPTSVKNVMKKCPAPRFIIPGHFSWENPKSLDYTLQLLKDY	5	249	96.4427	0	6	0	244	Cluster_878	CLUSTER_NOT_IN_NCBI_AMR_REF_DB	Cluster_876	LIPO_Sec_SPII_	15-16	LIPO_Sec_SPII_	15-16	H_x_H_x_D	H_x_x_D_N	C	H	.
B1_142	GCF_002921215.1	1428	1428	Bacillus_thuringiensis	Bacteria-Terrabacteria_group-Bacillota-Bacilli-Bacillales-Bacillaceae-Bacillus-Bacillus_cereus_group-	6350733	NZ_PDVK01000018.1	class_B1	278	+	76987	77686	76916	77689	ATGAAAAAGAATACGTTGTTAAAAGTAGGATTATGTGTAGGTTTACTAGGAACAATTCAATTTGTTAGCACAATTTCTTCTGTACAAGCATCACAAAAGGTAGAGAAAACAGTAATAAAAAATGAGACGGGAACCATTTCAATATCTCAGTTAAACAAGAATGTATGGGTTCATACGGAGTTAGGTTCTTTTAATGGAGAAGCAGTTCCTTCGAACGGTCTAGTTCTTAATACTTCTAAAGGGTTAGTACTTGTTGATTCTTCTTGGGATGACAAATTAACGAAGGAACTAATAGAAATGGTAGAAAAGAAGTTTCAGAAGCGTGTAACGGATGTCATTATTACACATGCGCACGCTGATCGAATTGGCGGAATAAAAACGTTGAAAGAAAGAGGAATT…	WP_000742473.1	BcII_family_subclass_B1_metallo-beta-lactamase	MKKNTLLKVGLCVGLLGTIQFVSTISSVQASQKVEKTVIKNETGTISISQLNKNVWVHTELGSFNGEAVPSNGLVLNTSKGLVLVDSSWDDKLTKELIEMVEKKFQKRVTDVIITHAHADRIGGIKTLKERGIKAHSTALTAELAKKSGYEEPLGDLQTVTNLKFGNMKVETFYPGKGHTEDNIVVWLPQYNILVGGCLVKSTSAKDLGNVADAYVNEWSTSIENVLKRYRNINVVVPGHGEVGNKGLLLYTLDLLK	ORF_OK	TRUE_HIT	lllslaaa........eekeeeekdelkiekladnvyvhtsykevegvgkvssngLvvidekevvlvDtpwteeqtekLldwiekklklkvkavistHfHeDrlGGlealnkkgiktyasalTnellkkegkeqakhsfkkeekltlgkekievfypGegHtkDNiVvwlpkekiLfGGClvksaeakslGnlgdAnveeWpksvekvkakypeakiVipGHgevgdkellehTlklle	TIS----SvqasqkveKTVIKNETGTISISQLNKNVWVHTELGSFNGE-AVPSNGLVLNTSKGLVLVDSSWDDKLTKELIEMVEKKFQKRVTDVIITHAHADRIGGIKTLKERGIKAHSTALTAELAKKSGYEEPLGDLQTVTNLKFGNMKVETFYPGKGHTEDNIVVWLPQYNILVGGCLVKSTSAKDLGNVADAYVNEWSTSIENVLKRYRNINVVVPGHGEVGNKGLLLYTLDLLK	17	247	90.9091	8	5	0	257	Cluster_137	BcII_family_subclass_B1_metallo-beta-lactamase_NG_047224.1_cds_WP_012261328.1_1	Cluster_139	SP_Sec_SPI_	30-31	SP_Sec_SPI_	30-31	H_x_H_x_D	H_x_x_D_N	C	H	.
B1_143	GCF_002923255.1	158836	158836	Enterobacter_hormaechei	Bacteria-Pseudomonadota-Gammaproteobacteria-Enterobacterales-Enterobacteriaceae-Enterobacter-Enterobacter_cloacae_complex-	5127388	NZ_BEFL01000048.1	class_B1	310.9	+	30	738	34	774	ATGAGCAAGTTATCTGTATTCTTTATATTTTTGTTTTGCAGCATTGCTACCGCAGCAGAGTCTTTGCCAGATTTAAAAATTGAAAAGCTTGATGAAGGCGTTTATGTTCATACTTCGTTTGAAGAAGTTAACGGGTGGGGCGTTGTTCCTAAACATGGTTTGGTGGTTCTTGTAAATGCTGAGGCTTACCTAATTGACACTCCATTTACGGCTAAAGATACTGAAAAGTTAGTCACTTGGTTTGTGGAGCGTGGCTATAAAATAAAAGGCAGCATTTCCTCTCATTTTCATAGCGACAGCACGGGCGGAATAGAGTGGCTTAATTCTCGATCTATCCCCACGTATGCATCTGAATTAACAAATGAACTGCTTAAAAAAGACGGTAAGGTTCAAGCCACA…	WP_003159548.1	subclass_B1_metallo-beta-lactamase_IMP-1	MSKLSVFFIFLFCSIATAAESLPDLKIEKLDEGVYVHTSFEEVNGWGVVPKHGLVVLVNAEAYLIDTPFTAKDTEKLVTWFVERGYKIKGSISSHFHSDSTGGIEWLNSRSIPTYASELTNELLKKDGKVQATNSFSGVNYWLVKNKIEVFYPGPGHTPDNVVVWLPERKILFGGCFIKPYGLGNLGDANIEAWPKSAKLLKSKYGKAKLVVPSHSEVGDASLLKLTLEQAVKGLNESKKPSKPSN	ORF_OK	TRUE_HIT	kklrkllllllllllllslaaaeekeeeekdelkiekladnvyvhtsykevegvgkvssngLvvidekevvlvDtpwteeqtekLldwiekklklkvkavistHfHeDrlGGlealnkkgiktyasalTnellkkegkeqakhsfkkeekltlgkekievfypGegHtkDNiVvwlpkekiLfGGClvksaeakslGnlgdAnveeWpksvekvkakypeakiVipGHgevgdkellehTlkllekak	KSMSKLSVFFIFLFCSIATA------AESLPDLKIEKLDEGVYVHTSFEEVNGWGVVPKHGLVVLVNAEAYLIDTPFTAKDTEKLVTWFVE-RGYKIKGSISSHFHSDSTGGIEWLNSRSIPTYASELTNELLKKDGKVQATNSFSGVNY-WLVKNKIEVFYPGPGHTPDNVVVWLPERKILFGGCFIKP---YGLGNLGDANIEAWPKSAKLLKSKYGKAKLVVPSHSEVGDASLLKLTLEQAVKGL	3	250	97.6285	0	11	0	246	Cluster_663	subclass_B1_metallo-beta-lactamase_IMP-37_NG_049201.1_cds_WP_063860593.1_1	Cluster_672	SP_Sec_SPI_	18-19	SP_Sec_SPI_	18-19	H_x_H_x_D	H_x_x_D_N	C	H	.
B1_144	GCF_002923275.1	299766	158836	Enterobacter_hormaechei_subsp_steigerwaltii	Bacteria-Pseudomonadota-Gammaproteobacteria-Enterobacterales-Enterobacteriaceae-Enterobacter-Enterobacter_cloacae_complex-	5307263	NZ_BEFZ01000156.1	class_B1	310.1	+	264	972	268	1008	ATGAGCAAGTTATCTGTATTCTTTATATTTTTGTTTTGCAGCATTGCTACCGCAGCAGAGTCTTTGCCAGATTTAAAAATTGAAAAGCTTGATGAAGGCGTTTATGTTCATACTTCGTTTGAAGAAGTTAACGGGTGGGGCGTTGTTCCTAAACATGGTTTGGTGGTTCTTGTAAATGCTGAGGCTTACCTAATTGACACTCCATTTACGGCTAAAGATACTGAAAAGTTAGTCACTTGGTTTGTGGAGCGTGGCTATAAAATAAAAGGCAGCATTTCCTCTCATTTTCATAGCGACAGCACGGGCGGAATAGAGTGGCTTAATTCTCGATCTATCCCCACGTATGCATCTGAATTAACAAATGAACTGCTTAAAAAAGACGGTAAGGTTCAAGCCACA…	WP_003159548.1	subclass_B1_metallo-beta-lactamase_IMP-1	MSKLSVFFIFLFCSIATAAESLPDLKIEKLDEGVYVHTSFEEVNGWGVVPKHGLVVLVNAEAYLIDTPFTAKDTEKLVTWFVERGYKIKGSISSHFHSDSTGGIEWLNSRSIPTYASELTNELLKKDGKVQATNSFSGVNYWLVKNKIEVFYPGPGHTPDNVVVWLPERKILFGGCFIKPYGLGNLGDANIEAWPKSAKLLKSKYGKAKLVVPSHSEVGDASLLKLTLEQAVKGLNESKKPSKPSN	ORF_OK	TRUE_HIT	kklrkllllllllllllslaaaeekeeeekdelkiekladnvyvhtsykevegvgkvssngLvvidekevvlvDtpwteeqtekLldwiekklklkvkavistHfHeDrlGGlealnkkgiktyasalTnellkkegkeqakhsfkkeekltlgkekievfypGegHtkDNiVvwlpkekiLfGGClvksaeakslGnlgdAnveeWpksvekvkakypeakiVipGHgevgdkellehTlkllekak	KSMSKLSVFFIFLFCSIATA------AESLPDLKIEKLDEGVYVHTSFEEVNGWGVVPKHGLVVLVNAEAYLIDTPFTAKDTEKLVTWFVE-RGYKIKGSISSHFHSDSTGGIEWLNSRSIPTYASELTNELLKKDGKVQATNSFSGVNY-WLVKNKIEVFYPGPGHTPDNVVVWLPERKILFGGCFIKP---YGLGNLGDANIEAWPKSAKLLKSKYGKAKLVVPSHSEVGDASLLKLTLEQAVKGL	3	250	97.6285	0	11	0	246	Cluster_663	subclass_B1_metallo-beta-lactamase_IMP-37_NG_049201.1_cds_WP_063860593.1_1	Cluster_672	SP_Sec_SPI_	18-19	SP_Sec_SPI_	18-19	H_x_H_x_D	H_x_x_D_N	C	H	.
B1_146	GCF_002927775.1	470	470	Acinetobacter_baumannii	Bacteria-Pseudomonadota-Gammaproteobacteria-Moraxellales-Moraxellaceae-Acinetobacter-Acinetobacter_calcoaceticus_baumannii_complex-	4033476	NZ_NRSN01000040.1	class_B1	272.6	+	208	976	173	985	ATGGAATTGCCCAATATTATGCACCCGGTCGCGAAGCTGAGCACCGCATTAGCCGCTGCATTGATGCTGAGCGGGTGCATGCCCGGTGAAATCCGCCCGACGATTGGCCAGCAAATGGAAACTGGCGACCAACGGTTTGGCGATCTGGTTTTCCGCCAGCTCGCACCGAATGTCTGGCAGCACACTTCCTATCTCGACATGCCGGGTTTCGGGGCAGTCGCTTCCAACGGTTTGATCGTCAGGGATGGCGGCCGCGTGCTGGTGGTCGATACCGCCTGGACCGATGACCAGACCGCCCAGATCCTCAACTGGATCAAGCAGGAGATCAACCTGCCGGTCGCGCTGGCGGTGGTGACTCACGCGCATCAGGACAAGATGGGCGGTATGGACGCGCTGCAT…	WP_004201164.1	subclass_B1_metallo-beta-lactamase_NDM-1	MELPNIMHPVAKLSTALAAALMLSGCMPGEIRPTIGQQMETGDQRFGDLVFRQLAPNVWQHTSYLDMPGFGAVASNGLIVRDGGRVLVVDTAWTDDQTAQILNWIKQEINLPVALAVVTHAHQDKMGGMDALHAAGIATYANALSNQLAPQEGMVAAQHSLTFAANGWVEPATAPNFGPLKVFYPGPGHTSDNITVGIDGTDIAFGGCLIKDSKAKSLGNLGDADTEHYAASARAFGAAFPKASMIVMSHSAPDSRAAITHTARMADKLR	ORF_OK	TRUE_HIT	kllllllllllllslaaa.........eekeeeekdelkiekladnvyvhtsykevegvgkvssngLvvidekevvlvDtpwteeqtekLldwiekklklkvkavistHfHeDrlGGlealnkkgiktyasalTnellkkegkeqakhsfkkeek......ltlgkekievfypGegHtkDNiVvwlpkekiLfGGClvksaeakslGnlgdAnveeWpksvekvkakypeakiVipGHgevgdkellehTlkllek	KLSTALAAALMLSGCMPGeirptigqqMETGDQRFGDLVFRQLAPNVWQHTSYLDMPGFGAVASNGLIVRDGGRVLVVDTAWTDDQTAQILNWIKQEINLPVALAVVTHAHQDKMGGMDALHAAGIATYANALSNQLAPQEGMVAAQHSLTFAANgwvepaTAPNFGPLKVFYPGPGHTSDNITVGIDGTDIAFGGCLIKDSKAKSLGNLGDADTEHYAASARAFGAAFPKASMIVMSHSAPDSRAAITHTARMADK	7	248	95.2569	15	0	0	270	Cluster_118	subclass_B1_metallo-beta-lactamase_NDM-18_NG_052866.1_cds_WP_077064890.1_1	Cluster_120	LIPO_Sec_SPII_	25-26	LIPO_Sec_SPII_	25-26	H_x_H_x_D	H_x_x_D_N	C	H	.
B1_147	GCF_002927805.1	470	470	Acinetobacter_baumannii	Bacteria-Pseudomonadota-Gammaproteobacteria-Moraxellales-Moraxellaceae-Acinetobacter-Acinetobacter_calcoaceticus_baumannii_complex-	3884817	NZ_NQXH01000034.1	class_B1	272.6	-	6366	7134	6358	7170	ATGGAATTGCCCAATATTATGCACCCGGTCGCGAAGCTGAGCACCGCATTAGCCGCTGCATTGATGCTGAGCGGGTGCATGCCCGGTGAAATCCGCCCGACGATTGGCCAGCAAATGGAAACTGGCGACCAACGGTTTGGCGATCTGGTTTTCCGCCAGCTCGCACCGAATGTCTGGCAGCACACTTCCTATCTCGACATGCCGGGTTTCGGGGCAGTCGCTTCCAACGGTTTGATCGTCAGGGATGGCGGCCGCGTGCTGGTGGTCGATACCGCCTGGACCGATGACCAGACCGCCCAGATCCTCAACTGGATCAAGCAGGAGATCAACCTGCCGGTCGCGCTGGCGGTGGTGACTCACGCGCATCAGGACAAGATGGGCGGTATGGACGCGCTGCAT…	WP_004201164.1	subclass_B1_metallo-beta-lactamase_NDM-1	MELPNIMHPVAKLSTALAAALMLSGCMPGEIRPTIGQQMETGDQRFGDLVFRQLAPNVWQHTSYLDMPGFGAVASNGLIVRDGGRVLVVDTAWTDDQTAQILNWIKQEINLPVALAVVTHAHQDKMGGMDALHAAGIATYANALSNQLAPQEGMVAAQHSLTFAANGWVEPATAPNFGPLKVFYPGPGHTSDNITVGIDGTDIAFGGCLIKDSKAKSLGNLGDADTEHYAASARAFGAAFPKASMIVMSHSAPDSRAAITHTARMADKLR	ORF_OK	TRUE_HIT	kllllllllllllslaaa.........eekeeeekdelkiekladnvyvhtsykevegvgkvssngLvvidekevvlvDtpwteeqtekLldwiekklklkvkavistHfHeDrlGGlealnkkgiktyasalTnellkkegkeqakhsfkkeek......ltlgkekievfypGegHtkDNiVvwlpkekiLfGGClvksaeakslGnlgdAnveeWpksvekvkakypeakiVipGHgevgdkellehTlkllek	KLSTALAAALMLSGCMPGeirptigqqMETGDQRFGDLVFRQLAPNVWQHTSYLDMPGFGAVASNGLIVRDGGRVLVVDTAWTDDQTAQILNWIKQEINLPVALAVVTHAHQDKMGGMDALHAAGIATYANALSNQLAPQEGMVAAQHSLTFAANgwvepaTAPNFGPLKVFYPGPGHTSDNITVGIDGTDIAFGGCLIKDSKAKSLGNLGDADTEHYAASARAFGAAFPKASMIVMSHSAPDSRAAITHTARMADK	7	248	95.2569	15	0	0	270	Cluster_118	subclass_B1_metallo-beta-lactamase_NDM-18_NG_052866.1_cds_WP_077064890.1_1	Cluster_120	LIPO_Sec_SPII_	25-26	LIPO_Sec_SPII_	25-26	H_x_H_x_D	H_x_x_D_N	C	H	.
B1_148	GCF_002933815.1	2050894	2050894	Sphingobacterium_sp_HMA12	Bacteria-FCB_group-Bacteroidota_Chlorobiota_group-Bacteroidota-Sphingobacteriia-Sphingobacteriales-Sphingobacteriaceae-Sphingobacterium-unclassified_Sphingobacterium-	6473343	NZ_BEYR01000001.1	class_B1	267.7	-	123115	123811	123110	123859	ATGTTTAAAAATACATTCCCTTTCTTCTCCGCAAAAGTAGTTACACTACTTTTTGGTCTTTCTTTCTGTGTATTCTCATCTTTACGGGCGCAGGAAAGGCCTTTATCCATTGAGAAGATCAACTCACACCTTTATCTTTATACGACTTACAATACTTTTGAAGGTACCAAATATGCTGCAAATGCGGTCTACTTAATCACCAAGAAAGGTGTTATTCTATTTGATACGCCTTGGGATTCCACGCAATATCAGCCGCTTTTGGACAGTATTAAACAAAAGCATCAGCTTCCTGTCATTGCGGTATATGCAACACATTGGCACGAGGACCGTGCGGGAGGATTTGCATATTATAATCGGATCGGAATTCCAACTTATGCAACAAAAATGACCAACGACCTG…	WP_104380879.1	BlaB_IND_MUS_family_subclass_B1_metallo-beta-lactamase	MFKNTFPFFSAKVVTLLFGLSFCVFSSLRAQERPLSIEKINSHLYLYTTYNTFEGTKYAANAVYLITKKGVILFDTPWDSTQYQPLLDSIKQKHQLPVIAVYATHWHEDRAGGFAYYNRIGIPTYATKMTNDLLKENNKAQATHLVKINNTYKIGGQSFVLNFFGAGHSLDNVVVWFPDYQILDGGCFIKSSEAKNLGFIGDGDVKAWKPALARLSAKYPQIKMVIPGHDEWRDNQQIKRTEELLTDKQ	ORF_OK	TRUE_HIT	llllllslaaaeekeeeekdelkiekladnvyvhtsykevegvgkvssngLvvidekevvlvDtpwteeqtekLldwiekklklkvkavistHfHeDrlGGlealnkkgiktyasalTnellkkegkeqakhsfkkeekltlgkekievfypGegHtkDNiVvwlpkekiLfGGClvksaeakslGnlgdAnveeWpksvekvkakypeakiVipGHgevgdkellehTlklleka	LLFGLSFCVF--SSLRAQERPLSIEKINSHLYLYTTYNTFEGT-KYAANAVYLITKKGVILFDTPWDSTQYQPLLDSIKQKHQLPVIAVYATHWHEDRAGGFAYYNRIGIPTYATKMTNDLLKENNKAQATHLVKINNTYKIGGQSFVLNFFGAGHSLDNVVVWFPDYQILDGGCFIKSSEAKNLGFIGDGDVKAWKPALARLSAKYPQIKMVIPGHDEWRDNQQIKRTEELLTDK	14	249	92.8854	0	3	0	249	Cluster_592	CLUSTER_NOT_IN_NCBI_AMR_REF_DB	Cluster_595	SP_Sec_SPI_	30-31	SP_Sec_SPI_	30-31	H_x_H_x_D	H_x_x_D_N	C	H	.
B1_149	GCF_002934605.1	1514080	1514080	Neolewinella_xylanilytica	Bacteria-FCB_group-Bacteroidota_Chlorobiota_group-Bacteroidota-Saprospiria-Saprospirales-Lewinellaceae-Neolewinella-	5375778	NZ_PTJC01000005.1	class_B1	228.2	+	405916	406621	405905	406633	ATGAAATGGCTCCTCCCCGTTCTCCTCTGCTTCGCCTGCCGGAGCAGCCCGCAAGCTGGCACCGATTACACCTCCGAAACGCTCACCGTCAACCGGCTTACCGACCACACCTACCGCCACCTCACCTACCTGGACGTACCCGGATATGGCCGCGTCCCCTGCAACGGCCTCATCGTGGTTAACGACGGTGAAGCGCTCGTCTTCGATTCCCCGAGTACCGACGCTACGGCCGGTGAACTGGTCGATTTCATCGGGGAAGAGCTCGGGGCCACCATCAAGGCCGTCGTAGCCACCCACTTCCACGACGACTGCGTAGGTGGCCTGGCCGCTTTTCACGGGCGCGGCATCCCTTCCTATGGACTAGCCGCAACAGTGCGCCGAGCGCAGGAGGAAGGCAAT…	WP_104417991.1	subclass_B1_metallo-beta-lactamase	MKWLLPVLLCFACRSSPQAGTDYTSETLTVNRLTDHTYRHLTYLDVPGYGRVPCNGLIVVNDGEALVFDSPSTDATAGELVDFIGEELGATIKAVVATHFHDDCVGGLAAFHGRGIPSYGLAATVRRAQEEGNPVPENAFDKRISLSVGDIETLTLHPGPGHTPDNVVAYVPADRVLFGGCLVKETGATKGNLADADTARWSATIGTVRDSFPRLRVVVPGHGEPGGPELLTYTAELFDPER	ORF_OK	TRUE_HIT	llllllllslaaa.eekeeeekdelkiekladnvyvhtsykevegvgkvssngLvvidekevvlvDtpwteeqtekLldwiekklklkvkavistHfHeDrlGGlealnkkgiktyasalTnellkkegkeqakhsfkkeekltlgkekievfypGegHtkDNiVvwlpkekiLfGGClvksaeakslGnlgdAnveeWpksvekvkakypeakiVipGHgevgdkellehTlklle	LLPVLLCFACRSSpQAGTDYTSETLTVNRLTDHTYRHLTYLDVPGYGRVPCNGLIVVNDGEALVFDSPSTDATAGELVDFIGEELGATIKAVVATHFHDDCVGGLAAFHGRGIPSYGLAATVRRAQEEGNPVPENAFDKRISLSVGDIETLTLHPGPGHTPDNVVAYVPADRVLFGGCLVKETGA-TKGNLADADTARWSATIGTVRDSFPRLRVVVPGHGEPGGPELLTYTAELFD	12	247	92.8854	1	1	0	242	Cluster_971	CLUSTER_NOT_IN_NCBI_AMR_REF_DB	Cluster_963	LIPO_Sec_SPII_	2013-12-01	LIPO_Sec_SPII_	2013-12-01	H_x_H_x_D	H_x_x_D_N	C	H	.
B1_15	GCF_002846395.1	1179743	1179743	Pontibacter_ramchanderi	Bacteria-FCB_group-Bacteroidota_Chlorobiota_group-Bacteroidota-Cytophagia-Cytophagales-Hymenobacteraceae-Pontibacter-	4430618	NZ_PJMU01000001.1	class_B1	258.4	+	1364972	1365701	1364898	1365707	ATGAAAAAGAGCCATCAATACCTTAAAAGATCGTCAGCAAAATCTTCGTTATGGGCGGGTGTTATATTTGTGGCCAGTTGCCTCTCCTGCCAGACACCCAGCGGCAACAAAACTAAAGCTGTAAAAGAAACCCTTAACGCCCAGCAAAGCTATACCTCCAAAACACTGGAAGTCCACCCGGTCACAGATCAGGTATACCAGCACCTGTCTTTTCTCCAGACTCAAAGTTTCGGAAATGTGCCCTGCAACGGAATGGTGGTGATCGACGGGAAGGAGGCTGTCCTTTTCGATACTCCAACTACAGAACAGGCCGCTGTGGAATTGATCGATTGGGTAGAGCAAAGTTTGGGAGGTAAGGTAAAGGCGGTGATCGCCACGCATTTTCATGAAGACTGTCTG…	WP_101443373.1	subclass_B1_metallo-beta-lactamase	MKKSHQYLKRSSAKSSLWAGVIFVASCLSCQTPSGNKTKAVKETLNAQQSYTSKTLEVHPVTDQVYQHLSFLQTQSFGNVPCNGMVVIDGKEAVLFDTPTTEQAAVELIDWVEQSLGGKVKAVIATHFHEDCLGGLAAFQQRGIPAYASHETIALAKANQAAVPDHGFDEELVMEVGSEQVLVLYPGRGHTYDNVVGYFPKAEALFGGCLIKEMGAGKGNLADADIVAWPLTVTQLKAKFPGVKHVIPGHGKVGGPELLDYTVRLFEQK	ORF_OK	TRUE_HIT	llllslaaa............eekeeeekdelkiekladnvyvhtsykevegvgkvssngLvvidekevvlvDtpwteeqtekLldwiekklklkvkavistHfHeDrlGGlealnkkgiktyasalTnellkkegkeqakhsfkkeekltlgkekievfypGegHtkDNiVvwlpkekiLfGGClvksaeakslGnlgdAnveeWpksvekvkakypeakiVipGHgevgdkellehTlkllek	ASCLSCQTPsgnktkavketlNAQQSYTSKTLEVHPVTDQVYQHLSFLQTQSFGNVPCNGMVVIDGKEAVLFDTPTTEQAAVELIDWVEQSLGGKVKAVIATHFHEDCLGGLAAFQQRGIPAYASHETIALAKANQAAVPDHGFDEELVMEVGSEQVLVLYPGRGHTYDNVVGYFPKAEALFGGCLIKEMGA-GKGNLADADIVAWPLTVTQLKAKFPGVKHVIPGHGKVGGPELLDYTVRLFEQ	16	248	91.6996	12	1	0	269	Cluster_135	CLUSTER_NOT_IN_NCBI_AMR_REF_DB	Cluster_137	LIPO_Sec_SPII_	26-27	LIPO_Sec_SPII_	26-27	H_x_H_x_D	H_x_x_D_N	C	H	.
B1_150	GCF_002934695.1	1636603	1636603	Acinetobacter_sp_ACNIH1	Bacteria-Pseudomonadota-Gammaproteobacteria-Moraxellales-Moraxellaceae-Acinetobacter-unclassified_Acinetobacter-	3696158	NZ_CP026425.1	class_B1	269.8	-	23473	24241	23465	24277	ATGGAATTGCCCAATATTATGCACCCGGTCGCGAAGCTGAGCACCGCATTAGCCGCTGCATTGATGCTGAGCGGGTGCATGCCCGGTGAAATCCGCCCGACGATTGGCCAGCAAATGGAAACTGGCGACCAACGGTTTGGCGATCTGGTTTTCCGCCAGCTCGCACCGAATGTCTGGCAGCACACTTCCTATCTCGACATGCCGGGTTTCGGGGCAGTCGCTTCCAACGGTTTGATCGTCAGGGATGGCGGCCGCGTGCTGGTGGTCGATACCGCCTGGACCGATGACCAGACCGCCCAGATCCTCAACTGGATCAAGCAGGAGATCAACCTGCCGGTCGCGCTGGCGGTGGTGACTCACGCGCATCAGGACAAGATGGGCGGTATGGACGCGCTGCAT…	WP_004201164.1	subclass_B1_metallo-beta-lactamase_NDM-1	MELPNIMHPVAKLSTALAAALMLSGCMPGEIRPTIGQQMETGDQRFGDLVFRQLAPNVWQHTSYLDMPGFGAVASNGLIVRDGGRVLVVDTAWTDDQTAQILNWIKQEINLPVALAVVTHAHQDKMGGMDALHAAGIATYANALSNQLAPQEGMVAAQHSLTFAANGWVEPATAPNFGPLKVFYPGPGHTSDNITVGIDGTDIAFGGCLIKDSKAKSLGNLGDADTEHYAASARAFGAAFPKASMIVMSHSAPDSRAAITHTARMADKLR	ORF_OK	TRUE_HIT	kllllllllllllslaaa.........eekeeeekdelkiekladnvyvhtsykevegvgkvssngLvvidekevvlvDtpwteeqtekLldwiekklklkvkavistHfHeDrlGGlealnkkgiktyasalTnellkkegkeqakhsfkkeek......ltlgkekievfypGegHtkDNiVvwlpkekiLfGGClvksaeakslGnlgdAnveeWpksvekvkakypeakiVipGHgevgdkellehTlkllek	KLSTALAAALMLSGCMPGeirptigqqMETGDQRFGDLVFRQLAPNVWQHTSYLDMPGFGAVASNGLIVRDGGRVLVVDTAWTDDQTAQILNWIKQEINLPVALAVVTHAHQDKMGGMDALHAAGIATYANALSNQLAPQEGMVAAQHSLTFAANgwvepaTAPNFGPLKVFYPGPGHTSDNITVGIDGTDIAFGGCLIKDSKAKSLGNLGDADTEHYAASARAFGAAFPKASMIVMSHSAPDSRAAITHTARMADK	7	248	95.2569	15	0	0	270	Cluster_118	subclass_B1_metallo-beta-lactamase_NDM-18_NG_052866.1_cds_WP_077064890.1_1	Cluster_120	LIPO_Sec_SPII_	25-26	LIPO_Sec_SPII_	25-26	H_x_H_x_D	H_x_x_D_N	C	H	.
B1_151	GCF_002943565.1	2058213	2058213	Marinicaulis_flavus	Bacteria-Pseudomonadota-Alphaproteobacteria-Parvularculales-Parvularculaceae-Marinicaulis-	4924481	NZ_PJCH01000005.1	class_B1	239.5	-	842418	843159	842404	843174	ATGTGGAAAGTTTTTCTCGCCGCTTTTTTGGTTTTCATCGCCGCATCGGCGCGCGCTGCTGAGGAACCGGCGCAAGGCGAAACGCATCAAGCGCCTGTTCTCGAAAAGATCGCAGACGATGTCTGGATTCACAAAAGCTGGCGTCATGTGAACGGGTGGGGCCTTGTCCTGTCACAGGGGCTTGTCGTGAAAGTCGACACGGGCGTCGTTCTGATCGACACAGCATGGACCGATGCGGATACGGAAGACTTGCTGGCGCTGATCGAAGCGGAGACCGGCGCGATGCCGGCGAAAGCCATCGTCACCCACGCCCACGCCGACAAGATGGGCGGCATGAAAGCCCTTCACGCCCATGGCGTCGAAACCATCGCGCATAAATTTTCAAACGAGGATGCGCCG…	WP_104829667.1	subclass_B1_metallo-beta-lactamase	MWKVFLAAFLVFIAASARAAEEPAQGETHQAPVLEKIADDVWIHKSWRHVNGWGLVLSQGLVVKVDTGVVLIDTAWTDADTEDLLALIEAETGAMPAKAIVTHAHADKMGGMKALHAHGVETIAHKFSNEDAPARGLTPAQTSMHLLEKGKQLYFAGYSGTPLEVYYPGAGHTRDNIVVYYAPAKVLFGGCLIRPGEASDLGNTADGDVNHWAQAARNVAEAFPEAEIVIPSHGPMGGRELLDHTIDLAESAAAAP	ORF_OK	TRUE_HIT	lllllllllllslaaa.eekeeeekdelkiekladnvyvhtsykevegvgkvssngLvvidekevvlvDtpwteeqtekLldwiekklklkvkavistHfHeDrlGGlealnkkgiktyasalTnellkkegkeqakhsfkkeek......ltlgkekievfypGegHtkDNiVvwlpkekiLfGGClvksaeakslGnlgdAnveeWpksvekvkakypeakiVipGHgevgdkellehTlklleka	FLAAFLVFIAASARAAeEPAQGETHQAPVLEKIADDVWIHKSWRHVNGWGLVLSQGLVVKVDTGVVLIDTAWTDADTEDLLALIEAETGAMPAKAIVTHAHADKMGGMKALHAHGVETIAHKFSNEDAPARGLTPAQTSMHLLEKgkqlyfAGYSGTPLEVYYPGAGHTRDNIVVYYAPAKVLFGGCLIRPGEASDLGNTADGDVNHWAQAARNVAEAFPEAEIVIPSHGPMGGRELLDHTIDLAESA	9	249	94.8617	7	0	0	256	Cluster_335	CLUSTER_NOT_IN_NCBI_AMR_REF_DB	Cluster_345	SP_Sec_SPI_	19-20	SP_Sec_SPI_	19-20	H_x_H_x_D	H_x_x_D_N	C	H	.
B1_152	GCF_002943655.1	297244	297244	Chryseobacterium_shigense	Bacteria-FCB_group-Bacteroidota_Chlorobiota_group-Bacteroidota-Flavobacteriia-Flavobacteriales-Weeksellaceae-Chryseobacterium_group-Chryseobacterium-	4889274	NZ_MUGP01000003.1	class_B1	274.6	+	373374	374106	373360	374112	ATGAAATCACTATCTAAAATTTTATTTTTATCCTCAGCGCTATTGTTTTTTAGCTGTACCTCTCAGAAAAAAGCTCAGAAAGCTAAAGTAGTGTACAAGACGGATAACCTTTCCGTCATTCAGCTGTCTGACGATATCTATCAGCATGTATCTTATTTAAGTACAGATTCCTTTGGAAAAGTAGAATGCAACGGAATGATCGTAAAAGATGGAAATGAAACCGTGATTCTGGATACTCCAACCAATGACAAAAGCACAGAAGAATTGATTTCATGGATCAAAAATACCCTTCATTCAAAAGTGAATGCGGTAGTTGCGACACATTTCCACGATGATTGTCTGGGAGGATTGAAAGAATTCGACAAAAACAATATTCCTTCTTACGCCAATAATAAAACC…	WP_076508134.1	subclass_B1_metallo-beta-lactamase	MKSLSKILFLSSALLFFSCTSQKKAQKAKVVYKTDNLSVIQLSDDIYQHVSYLSTDSFGKVECNGMIVKDGNETVILDTPTNDKSTEELISWIKNTLHSKVNAVVATHFHDDCLGGLKEFDKNNIPSYANNKTIELAKKAGAHVPGHGFNDTITLNAGKHKILVKYFGEGHTKDNVVAYVPDEKAMFGGCLIKEIDATKGYLGDANVHTWSQTVEKVKAQYPDAKIVMPGHGEVGGKELLDYTIRLFKNN	ORF_OK	TRUE_HIT	rkllllllllllllslaaa....eekeeeekdelkiekladnvyvhtsykevegvgkvssngLvvidekevvlvDtpwteeqtekLldwiekklklkvkavistHfHeDrlGGlealnkkgiktyasalTnellkkegkeqakhsfkkeekltlgkekievfypGegHtkDNiVvwlpkekiLfGGClvksaeakslGnlgdAnveeWpksvekvkakypeakiVipGHgevgdkellehTlkllek	SKI-LFLSSALLFFSCTSQkkaqKAKVVYKTDNLSVIQLSDDIYQHVSYLSTDSFGKVECNGMIVKDGNETVILDTPTNDKSTEELISWIKNTLHSKVNAVVATHFHDDCLGGLKEFDKNNIPSYANNKTIELAKKAGAHVPGHGFNDTITLNAGKHKILVKYFGEGHTKDNVVAYVPDEKAMFGGCLIKEIDA-TKGYLGDANVHTWSQTVEKVKAQYPDAKIVMPGHGEVGGKELLDYTIRLFKN	6	248	95.6522	4	2	0	250	Cluster_524	CLUSTER_NOT_IN_NCBI_AMR_REF_DB	Cluster_541	LIPO_Sec_SPII_	18-19	LIPO_Sec_SPII_	18-19	H_x_H_x_D	H_x_x_D_N	C	H	.
B1_153	GCF_002944585.1	492670	492670	Bacillus_velezensis	Bacteria-Terrabacteria_group-Bacillota-Bacilli-Bacillales-Bacillaceae-Bacillus-Bacillus_subtilis_group-Bacillus_amyloliquefaciens_group-	4328187	NZ_CP026533.1	class_B1	227.8	+	3042858	3043554	3042811	3043560	TTGAGAAAGCTTTCATTATTAATTCCGGGGTTATTTCTATTCGGCCTCTTTACTGCCGGAATGAAACCGGCACACGCGGCGGAGGGCTCCGCAGCAAAAGATGTCACTCTCACACAGCTGGCGCCGCATGTCTGGATGCATACAAGCACCGGTACGGCAGACGGAAGTCCCGTCCCTGCGAACGGATTGCTTCTTGAGACTTCCAAAGGAATCGTACTGATTGATACTCCGTGGAATGACAGTCTCACAGAGCAATTAATGACACAAATAAAAAAGCGGTTTCCCGGCAAAAAGATGACCGATGCCGTTGTGACACACGCTCATGACGATCGTATCGGCGGGCTGAACACACTGTACAAATACGGTGTAAAGGTGCACAGCACGAAGCTGACCGCCGAC…	WP_063636841.1	subclass_B1_metallo-beta-lactamase	MRKLSLLIPGLFLFGLFTAGMKPAHAAEGSAAKDVTLTQLAPHVWMHTSTGTADGSPVPANGLLLETSKGIVLIDTPWNDSLTEQLMTQIKKRFPGKKMTDAVVTHAHDDRIGGLNTLYKYGVKVHSTKLTADFARQQGYDRPLGDLKNVTKLQFGDMKIETFYPGKGHTEDNMTVWLPEDKLLFGGCLIKALETKEIVPTPGFYPDQWPRAVRKVMKRYQDISIVVPGHGSPGDDRLLPHTISLLKET	ORF_OK	TRUE_HIT	llllslaaaeekeeeekdelkiekladnvyvhtsykevegvgkvssngLvvidekevvlvDtpwteeqtekLldwiekkl.klkvkavistHfHeDrlGGlealnkkgiktyasalTnellkkegkeqakhsfkkeekltlgkekievfypGegHtkDNiVvwlpkekiLfGGClvksaeakslGnlgdAnveeWpksvekvkakypeakiVipGHgevgdkellehTlkllek	LFTAGMKPAHAAEGSAAKDVTLTQLAPHVWMHTSTGTADGS-PVPANGLLLETSKGIVLIDTPWNDSLTEQLMTQIKKRFpGKKMTDAVVTHAHDDRIGGLNTLYKYGVKVHSTKLTADFARQQGYDRPLGDLKNVTKLQFGDMKIETFYPGKGHTEDNMTVWLPEDKLLFGGCLIKALETKEIVPTPGFYPDQWPRAVRKVMKRYQDISIVVPGHGSPGDDRLLPHTISLLKE	16	248	91.6996	1	1	0	249	Cluster_210	CLUSTER_NOT_IN_NCBI_AMR_REF_DB	Cluster_216	SP_Sec_SPI_	26-27	SP_Sec_SPI_	26-27	H_x_H_x_D	H_x_x_D_N	C	H	.
B1_154	GCF_002944845.1	573	573	Klebsiella_pneumoniae	Bacteria-Pseudomonadota-Gammaproteobacteria-Enterobacterales-Enterobacteriaceae-Klebsiella_Raoultella_group-Klebsiella-	5782903	NZ_CP026590.1	class_B1	269.4	+	39966	40734	39931	40743	ATGGAATTGCCCAATATTATGCACCCGGTCGCGAAGCTGAGCACCGCATTAGCCGCTGCATTGATGCTGAGCGGGTGCATGCCCGGTGAAATCCGCCCGACGATTGGCCAGCAAATGGAAACTGGCGACCAACGGTTTGGCGATCTGGTTTTCCGCCAGCTCGCACCGAATGTCTGGCAGCACACTTCCTATCTCGACATGCCGGGTTTCGGGGCAGTCGCTTCCAACGGTTTGATCGTCAGGGATGGCGGCCGCGTGCTGGTGGTCGATACCGCCTGGACCGATGACCAGACCGCCCAGATCCTCAACTGGATCAAGCAGGAGATCAACCTGCCGGTCGCGCTGGCGGTGGTGACTCACGCGCATCAGGACAAGATGGGCGGTATGGACGCGCTGCAT…	WP_004201164.1	subclass_B1_metallo-beta-lactamase_NDM-1	MELPNIMHPVAKLSTALAAALMLSGCMPGEIRPTIGQQMETGDQRFGDLVFRQLAPNVWQHTSYLDMPGFGAVASNGLIVRDGGRVLVVDTAWTDDQTAQILNWIKQEINLPVALAVVTHAHQDKMGGMDALHAAGIATYANALSNQLAPQEGMVAAQHSLTFAANGWVEPATAPNFGPLKVFYPGPGHTSDNITVGIDGTDIAFGGCLIKDSKAKSLGNLGDADTEHYAASARAFGAAFPKASMIVMSHSAPDSRAAITHTARMADKLR	ORF_OK	TRUE_HIT	kllllllllllllslaaa.........eekeeeekdelkiekladnvyvhtsykevegvgkvssngLvvidekevvlvDtpwteeqtekLldwiekklklkvkavistHfHeDrlGGlealnkkgiktyasalTnellkkegkeqakhsfkkeek......ltlgkekievfypGegHtkDNiVvwlpkekiLfGGClvksaeakslGnlgdAnveeWpksvekvkakypeakiVipGHgevgdkellehTlkllek	KLSTALAAALMLSGCMPGeirptigqqMETGDQRFGDLVFRQLAPNVWQHTSYLDMPGFGAVASNGLIVRDGGRVLVVDTAWTDDQTAQILNWIKQEINLPVALAVVTHAHQDKMGGMDALHAAGIATYANALSNQLAPQEGMVAAQHSLTFAANgwvepaTAPNFGPLKVFYPGPGHTSDNITVGIDGTDIAFGGCLIKDSKAKSLGNLGDADTEHYAASARAFGAAFPKASMIVMSHSAPDSRAAITHTARMADK	7	248	95.2569	15	0	0	270	Cluster_118	subclass_B1_metallo-beta-lactamase_NDM-18_NG_052866.1_cds_WP_077064890.1_1	Cluster_120	LIPO_Sec_SPII_	25-26	LIPO_Sec_SPII_	25-26	H_x_H_x_D	H_x_x_D_N	C	H	.
B1_155	GCF_002945135.3	562	562	Escherichia_coli	Bacteria-Pseudomonadota-Gammaproteobacteria-Enterobacterales-Enterobacteriaceae-Escherichia-	5187212	NZ_CP026577.2	class_B1	269.3	+	29250	30018	29215	30027	ATGGAATTGCCCAATATTATGCACCCGGTCGCGAAGCTGAGCACCGCATTAGCCGCTGCATTGATGCTGAGCGGGTGCATGCCCGGTGAAATCCGCCCGACGATTGGCCAGCAAATGGAAACTGGCGACCAACGGTTTGGCGATCTGGTTTTCCGCCAGCTCGCACCGAATGTCTGGCAGCACACTTCCTATCTCGACATGCCGGGTTTCGGGGCAGTCGCTTCCAACGGTTTGATCGTCAGGGATGGCGGCCGCGTGCTGTTGGTCGATACCGCCTGGACCGATGACCAGACCGCCCAGATCCTCAACTGGATCAAGCAGGAGATCAACCTGCCGGTCGCGCTGGCGGTGGTGACTCACGCGCATCAGGACAAGATGGGCGGTATGGACGCGCTGCAT…	WP_023408309.1	subclass_B1_metallo-beta-lactamase_NDM-5	MELPNIMHPVAKLSTALAAALMLSGCMPGEIRPTIGQQMETGDQRFGDLVFRQLAPNVWQHTSYLDMPGFGAVASNGLIVRDGGRVLLVDTAWTDDQTAQILNWIKQEINLPVALAVVTHAHQDKMGGMDALHAAGIATYANALSNQLAPQEGLVAAQHSLTFAANGWVEPATAPNFGPLKVFYPGPGHTSDNITVGIDGTDIAFGGCLIKDSKAKSLGNLGDADTEHYAASARAFGAAFPKASMIVMSHSAPDSRAAITHTARMADKLR	ORF_OK	TRUE_HIT	kllllllllllllslaaa.........eekeeeekdelkiekladnvyvhtsykevegvgkvssngLvvidekevvlvDtpwteeqtekLldwiekklklkvkavistHfHeDrlGGlealnkkgiktyasalTnellkkegkeqakhsfkkeek......ltlgkekievfypGegHtkDNiVvwlpkekiLfGGClvksaeakslGnlgdAnveeWpksvekvkakypeakiVipGHgevgdkellehTlkllek	KLSTALAAALMLSGCMPGeirptigqqMETGDQRFGDLVFRQLAPNVWQHTSYLDMPGFGAVASNGLIVRDGGRVLLVDTAWTDDQTAQILNWIKQEINLPVALAVVTHAHQDKMGGMDALHAAGIATYANALSNQLAPQEGLVAAQHSLTFAANgwvepaTAPNFGPLKVFYPGPGHTSDNITVGIDGTDIAFGGCLIKDSKAKSLGNLGDADTEHYAASARAFGAAFPKASMIVMSHSAPDSRAAITHTARMADK	7	248	95.2569	15	0	0	270	Cluster_118	subclass_B1_metallo-beta-lactamase_NDM-18_NG_052866.1_cds_WP_077064890.1_1	Cluster_120	LIPO_Sec_SPII_	25-26	LIPO_Sec_SPII_	25-26	H_x_H_x_D	H_x_x_D_N	C	H	.
B1_156	GCF_002946595.1	2079596	2079596	Acinetobacter_sp_SWBY1	Bacteria-Pseudomonadota-Gammaproteobacteria-Moraxellales-Moraxellaceae-Acinetobacter-unclassified_Acinetobacter-	2953039	NZ_CP026617.1	class_B1	269.8	+	9788	10556	9753	10565	ATGGAATTGCCCAATATTATGCACCCGGTCGCGAAGCTGAGCACCGCATTAGCCGCTGCATTGATGCTGAGCGGGTGCATGCCCGGTGAAATCCGCCCGACGATTGGCCAGCAAATGGAAACTGGCGACCAACGGTTTGGCGATCTGGTTTTCCGCCAGCTCGCACCGAATGTCTGGCAGCACACTTCCTATCTCGACATGCCGGGTTTCGGGGCAGTCGCTTCCAACGGTTTGATCGTCAGGGATGGCGGCCGCGTGCTGGTGGTCGATACCGCCTGGACCGATGACCAGACCGCCCAGATCCTCAACTGGATCAAGCAGGAGATCAACCTGCCGGTCGCGCTGGCGGTGGTGACTCACGCGCATCAGGACAAGATGGGCGGTATGGACGCGCTGCAT…	WP_004201164.1	subclass_B1_metallo-beta-lactamase_NDM-1	MELPNIMHPVAKLSTALAAALMLSGCMPGEIRPTIGQQMETGDQRFGDLVFRQLAPNVWQHTSYLDMPGFGAVASNGLIVRDGGRVLVVDTAWTDDQTAQILNWIKQEINLPVALAVVTHAHQDKMGGMDALHAAGIATYANALSNQLAPQEGMVAAQHSLTFAANGWVEPATAPNFGPLKVFYPGPGHTSDNITVGIDGTDIAFGGCLIKDSKAKSLGNLGDADTEHYAASARAFGAAFPKASMIVMSHSAPDSRAAITHTARMADKLR	ORF_OK	TRUE_HIT	kllllllllllllslaaa.........eekeeeekdelkiekladnvyvhtsykevegvgkvssngLvvidekevvlvDtpwteeqtekLldwiekklklkvkavistHfHeDrlGGlealnkkgiktyasalTnellkkegkeqakhsfkkeek......ltlgkekievfypGegHtkDNiVvwlpkekiLfGGClvksaeakslGnlgdAnveeWpksvekvkakypeakiVipGHgevgdkellehTlkllek	KLSTALAAALMLSGCMPGeirptigqqMETGDQRFGDLVFRQLAPNVWQHTSYLDMPGFGAVASNGLIVRDGGRVLVVDTAWTDDQTAQILNWIKQEINLPVALAVVTHAHQDKMGGMDALHAAGIATYANALSNQLAPQEGMVAAQHSLTFAANgwvepaTAPNFGPLKVFYPGPGHTSDNITVGIDGTDIAFGGCLIKDSKAKSLGNLGDADTEHYAASARAFGAAFPKASMIVMSHSAPDSRAAITHTARMADK	7	248	95.2569	15	0	0	270	Cluster_118	subclass_B1_metallo-beta-lactamase_NDM-18_NG_052866.1_cds_WP_077064890.1_1	Cluster_120	LIPO_Sec_SPII_	25-26	LIPO_Sec_SPII_	25-26	H_x_H_x_D	H_x_x_D_N	C	H	.
B1_157	GCF_002949305.1	54291	54291	Raoultella_ornithinolytica	Bacteria-Pseudomonadota-Gammaproteobacteria-Enterobacterales-Enterobacteriaceae-Klebsiella_Raoultella_group-Raoultella-	5861850	NZ_PTXP01000032.1	class_B1	271.5	-	6900	7668	6892	7704	ATGGAATTGCCCAATATTATGCACCCGGTCGCGAAGCTGAGCACCGCATTAGCCGCTGCATTGATGCTGAGCGGGTGCATGCCCGGTGAAATCCGCCCGACGATTGGCCAGCAAATGGAAACTGGCGACCAACGGTTTGGCGATCTGGTTTTCCGCCAGCTCGCACCGAATGTCTGGCAGCACACTTCCTATCTCGACATGCCGGGTTTCGGGGCAGTCGCTTCCAACGGTTTGATCGTCAGGGATGGCGGCCGCGTGCTGGTGGTCGATACCGCCTGGACCGATGACCAGACCGCCCAGATCCTCAACTGGATCAAGCAGGAGATCAACCTGCCGGTCGCGCTGGCGGTGGTGACTCACGCGCATCAGGACAAGATGGGCGGTATGGACGCGCTGCAT…	WP_004201164.1	subclass_B1_metallo-beta-lactamase_NDM-1	MELPNIMHPVAKLSTALAAALMLSGCMPGEIRPTIGQQMETGDQRFGDLVFRQLAPNVWQHTSYLDMPGFGAVASNGLIVRDGGRVLVVDTAWTDDQTAQILNWIKQEINLPVALAVVTHAHQDKMGGMDALHAAGIATYANALSNQLAPQEGMVAAQHSLTFAANGWVEPATAPNFGPLKVFYPGPGHTSDNITVGIDGTDIAFGGCLIKDSKAKSLGNLGDADTEHYAASARAFGAAFPKASMIVMSHSAPDSRAAITHTARMADKLR	ORF_OK	TRUE_HIT	kllllllllllllslaaa.........eekeeeekdelkiekladnvyvhtsykevegvgkvssngLvvidekevvlvDtpwteeqtekLldwiekklklkvkavistHfHeDrlGGlealnkkgiktyasalTnellkkegkeqakhsfkkeek......ltlgkekievfypGegHtkDNiVvwlpkekiLfGGClvksaeakslGnlgdAnveeWpksvekvkakypeakiVipGHgevgdkellehTlkllek	KLSTALAAALMLSGCMPGeirptigqqMETGDQRFGDLVFRQLAPNVWQHTSYLDMPGFGAVASNGLIVRDGGRVLVVDTAWTDDQTAQILNWIKQEINLPVALAVVTHAHQDKMGGMDALHAAGIATYANALSNQLAPQEGMVAAQHSLTFAANgwvepaTAPNFGPLKVFYPGPGHTSDNITVGIDGTDIAFGGCLIKDSKAKSLGNLGDADTEHYAASARAFGAAFPKASMIVMSHSAPDSRAAITHTARMADK	7	248	95.2569	15	0	0	270	Cluster_118	subclass_B1_metallo-beta-lactamase_NDM-18_NG_052866.1_cds_WP_077064890.1_1	Cluster_120	LIPO_Sec_SPII_	25-26	LIPO_Sec_SPII_	25-26	H_x_H_x_D	H_x_x_D_N	C	H	.
B1_158	GCF_002949335.1	54291	54291	Raoultella_ornithinolytica	Bacteria-Pseudomonadota-Gammaproteobacteria-Enterobacterales-Enterobacteriaceae-Klebsiella_Raoultella_group-Raoultella-	5872981	NZ_PTXR01000034.1	class_B1	271.5	-	6900	7668	6892	7704	ATGGAATTGCCCAATATTATGCACCCGGTCGCGAAGCTGAGCACCGCATTAGCCGCTGCATTGATGCTGAGCGGGTGCATGCCCGGTGAAATCCGCCCGACGATTGGCCAGCAAATGGAAACTGGCGACCAACGGTTTGGCGATCTGGTTTTCCGCCAGCTCGCACCGAATGTCTGGCAGCACACTTCCTATCTCGACATGCCGGGTTTCGGGGCAGTCGCTTCCAACGGTTTGATCGTCAGGGATGGCGGCCGCGTGCTGGTGGTCGATACCGCCTGGACCGATGACCAGACCGCCCAGATCCTCAACTGGATCAAGCAGGAGATCAACCTGCCGGTCGCGCTGGCGGTGGTGACTCACGCGCATCAGGACAAGATGGGCGGTATGGACGCGCTGCAT…	WP_004201164.1	subclass_B1_metallo-beta-lactamase_NDM-1	MELPNIMHPVAKLSTALAAALMLSGCMPGEIRPTIGQQMETGDQRFGDLVFRQLAPNVWQHTSYLDMPGFGAVASNGLIVRDGGRVLVVDTAWTDDQTAQILNWIKQEINLPVALAVVTHAHQDKMGGMDALHAAGIATYANALSNQLAPQEGMVAAQHSLTFAANGWVEPATAPNFGPLKVFYPGPGHTSDNITVGIDGTDIAFGGCLIKDSKAKSLGNLGDADTEHYAASARAFGAAFPKASMIVMSHSAPDSRAAITHTARMADKLR	ORF_OK	TRUE_HIT	kllllllllllllslaaa.........eekeeeekdelkiekladnvyvhtsykevegvgkvssngLvvidekevvlvDtpwteeqtekLldwiekklklkvkavistHfHeDrlGGlealnkkgiktyasalTnellkkegkeqakhsfkkeek......ltlgkekievfypGegHtkDNiVvwlpkekiLfGGClvksaeakslGnlgdAnveeWpksvekvkakypeakiVipGHgevgdkellehTlkllek	KLSTALAAALMLSGCMPGeirptigqqMETGDQRFGDLVFRQLAPNVWQHTSYLDMPGFGAVASNGLIVRDGGRVLVVDTAWTDDQTAQILNWIKQEINLPVALAVVTHAHQDKMGGMDALHAAGIATYANALSNQLAPQEGMVAAQHSLTFAANgwvepaTAPNFGPLKVFYPGPGHTSDNITVGIDGTDIAFGGCLIKDSKAKSLGNLGDADTEHYAASARAFGAAFPKASMIVMSHSAPDSRAAITHTARMADK	7	248	95.2569	15	0	0	270	Cluster_118	subclass_B1_metallo-beta-lactamase_NDM-18_NG_052866.1_cds_WP_077064890.1_1	Cluster_120	LIPO_Sec_SPII_	25-26	LIPO_Sec_SPII_	25-26	H_x_H_x_D	H_x_x_D_N	C	H	.
B1_159	GCF_002949385.1	54291	54291	Raoultella_ornithinolytica	Bacteria-Pseudomonadota-Gammaproteobacteria-Enterobacterales-Enterobacteriaceae-Klebsiella_Raoultella_group-Raoultella-	5813746	NZ_PTXQ01000049.1	class_B1	304.8	-	2162	2870	2127	2867	ATGAGCAAGTTATCTGTATTCTTTATATTTTTGTTTTGTAGCATTGCTACCGCAGCAGAGCCTTTGCCAGATTTAAAAATTGAAAAACTTGATGAAGGCGTTTATGTTCATACTTCGTTTGAAGAAGTTAACGGGTGGGGCGTTGTTCCTAAACATGGTTTGGTTGTTCTTGTAGATGCTGAAGCTTATCTAATTGACACTCCATTTACGGCTAAAGATACTGAAAAGTTAGTCACTTGGTTTGTGGAACGTGGCTATAAAATAAAAGGCAGTATTTCCTCTCATTTTCATAGTGACAGCACGGGCGGAATAGAGTGGCTTAATTCTCAATCCATCCCCACGTATGCGTCTGAATTAACTAATGAGCTGCTTAAAAAAGACGGTAAGGTTCAAGCTAAA…	WP_015060105.1	subclass_B1_metallo-beta-lactamase_IMP-4	MSKLSVFFIFLFCSIATAAEPLPDLKIEKLDEGVYVHTSFEEVNGWGVVPKHGLVVLVDAEAYLIDTPFTAKDTEKLVTWFVERGYKIKGSISSHFHSDSTGGIEWLNSQSIPTYASELTNELLKKDGKVQAKNSFGGVNYWLVKNKIEVFYPGPGHTPDNLVVWLPERKILFGGCFIKPYGLGNLGDANLEAWPKSAKLLISKYGKAKLVVPSHSEAGDASLLKLTLEQAVKGLNESKKPSKLSN	ORF_OK	TRUE_HIT	kklrkllllllllllllslaaaeekeeeekdelkiekladnvyvhtsykevegvgkvssngLvvidekevvlvDtpwteeqtekLldwiekklklkvkavistHfHeDrlGGlealnkkgiktyasalTnellkkegkeqakhsfkkeekltlgkekievfypGegHtkDNiVvwlpkekiLfGGClvksaeakslGnlgdAnveeWpksvekvkakypeakiVipGHgevgdkellehTlkllekak	ESMSKLSVFFIFLFCSIATA------AEPLPDLKIEKLDEGVYVHTSFEEVNGWGVVPKHGLVVLVDAEAYLIDTPFTAKDTEKLVTWFVE-RGYKIKGSISSHFHSDSTGGIEWLNSQSIPTYASELTNELLKKDGKVQAKNSFGGVNY-WLVKNKIEVFYPGPGHTPDNLVVWLPERKILFGGCFIKP---YGLGNLGDANLEAWPKSAKLLISKYGKAKLVVPSHSEAGDASLLKLTLEQAVKGL	3	250	97.6285	0	11	0	246	Cluster_663	subclass_B1_metallo-beta-lactamase_IMP-37_NG_049201.1_cds_WP_063860593.1_1	Cluster_672	SP_Sec_SPI_	18-19	SP_Sec_SPI_	18-19	H_x_H_x_D	H_x_x_D_N	C	H	.
B1_16	GCF_002846555.1	1250026	1250026	Aquimarina_sp_MAR_2010_214	Bacteria-FCB_group-Bacteroidota_Chlorobiota_group-Bacteroidota-Flavobacteriia-Flavobacteriales-Flavobacteriaceae-Aquimarina-unclassified_Aquimarina-	5982454	NZ_PJMS01000001.1	class_B1	272.1	+	4744474	4745203	4744466	4745209	ATGAAAAATATTAGTAAGCCTCTATTTATTTTAGTGGTATTATTATGCATGTACTCATGCAAAAAAAATCAGACACATGAAGTCATTACAGTCTCTGAAGAACTTCAAATCAAAAAACTTAATGAGCATAGCTATATTCATACATCATATCTGAATACCGAAAGTTTTGGAAAAGTACCTTGTAATGGTATGATTATTATTGATAACAATGAAGCATTGATATTTGATACACCAACCAATGACTCTGTATCTGAAGTATTAATAAATTGGGTTCAAAAAAATTTAAAATGCAAAGTCAAAGGAGTCGTTGCCACACATTTTCATGATGATTGTTTAGGTGGTTTAAAGGAGTTTCATAACAGAAACATTTCTTCATATGCCAGCAATGAAACCATACGT…	WP_101449684.1	subclass_B1_metallo-beta-lactamase	MKNISKPLFILVVLLCMYSCKKNQTHEVITVSEELQIKKLNEHSYIHTSYLNTESFGKVPCNGMIIIDNNEALIFDTPTNDSVSEVLINWVQKNLKCKVKGVVATHFHDDCLGGLKEFHNRNISSYASNETIRLAKNKNYTIPQNGFDTHLELKVGKKKVFNTFYGEGHTSDNVISYFPDEKVLFGGCLIKSKGAKKGYLGDANVKEWSTTVSKIKEKYPKVEIVIPGHGAHGGQELLEYTISLFKA	ORF_OK	TRUE_HIT	klrkllllllllllllslaaa.eekeeeekdelkiekladnvyvhtsykevegvgkvssngLvvidekevvlvDtpwteeqtekLldwiekklklkvkavistHfHeDrlGGlealnkkgiktyasalTnellkkegkeqakhsfkkeekltlgkekievfypGegHtkDNiVvwlpkekiLfGGClvksaeakslGnlgdAnveeWpksvekvkakypeakiVipGHgevgdkellehTlklle	NISKPLFILVVLLCMYSCKKNqTHEVITVSEELQIKKLNEHSYIHTSYLNTESFGKVPCNGMIIIDNNEALIFDTPTNDSVSEVLINWVQKNLKCKVKGVVATHFHDDCLGGLKEFHNRNISSYASNETIRLAKNKNYTIPQNGFDTHLELKVGKKKVFNTFYGEGHTSDNVISYFPDEKVLFGGCLIKSKGA-KKGYLGDANVKEWSTTVSKIKEKYPKVEIVIPGHGAHGGQELLEYTISLFK	4	247	96.0474	1	1	0	247	Cluster_611	CLUSTER_NOT_IN_NCBI_AMR_REF_DB	Cluster_614	LIPO_Sec_SPII_	19-20	LIPO_Sec_SPII_	19-20	H_x_H_x_D	H_x_x_D_N	C	H	.
B1_160	GCF_002951395.1	1117645	1117645	Elizabethkingia_anophelis	Bacteria-FCB_group-Bacteroidota_Chlorobiota_group-Bacteroidota-Flavobacteriia-Flavobacteriales-Weeksellaceae-Elizabethkingia-	3998386	NZ_CP014020.1	class_B1	284.9	+	2176041	2176770	2176042	2176788	ATGAAGAATATAATGCGGGCACTGATCCTTGTTTTTGGTTTTATGAGTTTTTTTATGTTTGGACAGGAGAATCCTGACGTTAAAATTGATAAGCTAAAAGATAATCTGTATGTATACACAACCTACAATACATTTAACGGGACTAAATATGCCGCTAATGCAGTATATCTGGTAACTGATAAGGGTGTTGTGGTTATAGACTGTCCGTGGGGAGAAGACAAATTTAAAAGCTTTACGGACGAGATTTATAAAAAACACGGAAAGAAAGTTATTATGAATATTGCAACACATTCTCATGATGATCGTGCCGGAGGTCTTGAATATTTTGGTAAAATAGGTGCAAAAACTTATTCTACTAAAATGACAGATTCTATTTTAGCAAAAGAGAATAAGCCAAGA…	WP_009091845.1	BlaB_family_subclass_B1_metallo-beta-lactamase	MKNIMRALILVFGFMSFFMFGQENPDVKIDKLKDNLYVYTTYNTFNGTKYAANAVYLVTDKGVVVIDCPWGEDKFKSFTDEIYKKHGKKVIMNIATHSHDDRAGGLEYFGKIGAKTYSTKMTDSILAKENKPRAQYTFDNNKSFKVGKSEFQVYYPGKGHTADNVVVWFPKEKVLVGGCIIKSADSKDLGYIGEAYVNDWTQSVHNIQQKFSGAQYVVAGHDDWKDQRSIQRTLDLINEYQQKQKASN	ORF_OK	TRUE_HIT	klrkllllllllllllslaaaeekeeeekdelkiekladnvyvhtsykevegvgkvssngLvvidekevvlvDtpwteeqtekLldwiekklklkvkavistHfHeDrlGGlealnkkgiktyasalTnellkkegkeqakhsfkkeekltlgkekievfypGegHtkDNiVvwlpkekiLfGGClvksaeakslGnlgdAnveeWpksvekvkakypeakiVipGHgevgdkellehTlkllekakkk	IMKNIMRALILVFGFMSFF----MFGQENPDVKIDKLKDNLYVYTTYNTFNGT-KYAANAVYLVTDKGVVVIDCPWGEDKFKSFTDEIYKKHGKKVIMNIATHSHDDRAGGLEYFGKIGAKTYSTKMTDSILAKENKPRAQYTFDNNKSFKVGKSEFQVYYPGKGHTADNVVVWFPKEKVLVGGCIIKSADSKDLGYIGEAYVNDWTQSVHNIQQKFSGAQYVVAGHDDWKDQRSIQRTLDLINEYQQK	4	252	98.0237	0	5	0	248	Cluster_590	BlaB_family_subclass_B1_metallo-beta-lactamase_NG_047491.1_cds_WP_063842622.1_1	Cluster_593	SP_Sec_SPI_	21-22	SP_Sec_SPI_	21-22	H_x_H_x_D	H_x_x_D_N	C	H	.
B1_161	GCF_002951455.1	1117645	1117645	Elizabethkingia_anophelis	Bacteria-FCB_group-Bacteroidota_Chlorobiota_group-Bacteroidota-Flavobacteriia-Flavobacteriales-Weeksellaceae-Elizabethkingia-	3998385	NZ_CP014021.1	class_B1	284.9	+	2701017	2701746	2701018	2701764	ATGAAGAATATAATGCGGGCACTGATCCTTGTTTTTGGTTTTATGAGTTTTTTTATGTTTGGACAGGAGAATCCTGACGTTAAAATTGATAAGCTAAAAGATAATCTGTATGTATACACAACCTACAATACATTTAACGGGACTAAATATGCCGCTAATGCAGTATATCTGGTAACTGATAAGGGTGTTGTGGTTATAGACTGTCCGTGGGGAGAAGACAAATTTAAAAGCTTTACGGACGAGATTTATAAAAAACACGGAAAGAAAGTTATTATGAATATTGCAACACATTCTCATGATGATCGTGCCGGAGGTCTTGAATATTTTGGTAAAATAGGTGCAAAAACTTATTCTACTAAAATGACAGATTCTATTTTAGCAAAAGAGAATAAGCCAAGA…	WP_009091845.1	BlaB_family_subclass_B1_metallo-beta-lactamase	MKNIMRALILVFGFMSFFMFGQENPDVKIDKLKDNLYVYTTYNTFNGTKYAANAVYLVTDKGVVVIDCPWGEDKFKSFTDEIYKKHGKKVIMNIATHSHDDRAGGLEYFGKIGAKTYSTKMTDSILAKENKPRAQYTFDNNKSFKVGKSEFQVYYPGKGHTADNVVVWFPKEKVLVGGCIIKSADSKDLGYIGEAYVNDWTQSVHNIQQKFSGAQYVVAGHDDWKDQRSIQRTLDLINEYQQKQKASN	ORF_OK	TRUE_HIT	klrkllllllllllllslaaaeekeeeekdelkiekladnvyvhtsykevegvgkvssngLvvidekevvlvDtpwteeqtekLldwiekklklkvkavistHfHeDrlGGlealnkkgiktyasalTnellkkegkeqakhsfkkeekltlgkekievfypGegHtkDNiVvwlpkekiLfGGClvksaeakslGnlgdAnveeWpksvekvkakypeakiVipGHgevgdkellehTlkllekakkk	IMKNIMRALILVFGFMSFF----MFGQENPDVKIDKLKDNLYVYTTYNTFNGT-KYAANAVYLVTDKGVVVIDCPWGEDKFKSFTDEIYKKHGKKVIMNIATHSHDDRAGGLEYFGKIGAKTYSTKMTDSILAKENKPRAQYTFDNNKSFKVGKSEFQVYYPGKGHTADNVVVWFPKEKVLVGGCIIKSADSKDLGYIGEAYVNDWTQSVHNIQQKFSGAQYVVAGHDDWKDQRSIQRTLDLINEYQQK	4	252	98.0237	0	5	0	248	Cluster_590	BlaB_family_subclass_B1_metallo-beta-lactamase_NG_047491.1_cds_WP_063842622.1_1	Cluster_593	SP_Sec_SPI_	21-22	SP_Sec_SPI_	21-22	H_x_H_x_D	H_x_x_D_N	C	H	.
B1_162	GCF_002952815.1	1396	1396	Bacillus_cereus	Bacteria-Terrabacteria_group-Bacillota-Bacilli-Bacillales-Bacillaceae-Bacillus-Bacillus_cereus_group-	4880708	NZ_CP026376.1	class_B1	273.8	+	4195053	4195758	4194988	4195761	ATGAAAAAGAATACATTATTAAAATTAGGGGTATGTGTTAGTTTGCTAGGAACAACTCAATTTGTTAGTGCTGTTTCTTCTGTACAAGCGGAACAAAAATTAAAGCAAAAAGTAATAAAAAATGAGGCAGGAACTATTTCGATTTCTCAGTTAAACAAAAATGTATGGGTTCATACGGAGTTAGGTTATTTTAACGGAGAAGCAGTTCCTTCGAACGGTTTAGTTCTTACTACTTCAAAGGGGGTAGTACTTGTTGATTCTTCTTGGGATGACAAATTAACGAAGGAACTAATAGAAATGGTAGAAAAGAAATTTCAGAAGCGCGTAACAGATGTCATTATTACACATGCACACGCTGATCGAATTGGCGGAATGAAAACATTGAAAGAAAGAGGCATT…	WP_098921787.1	BcII_family_subclass_B1_metallo-beta-lactamase	MKKNTLLKLGVCVSLLGTTQFVSAVSSVQAEQKLKQKVIKNEAGTISISQLNKNVWVHTELGYFNGEAVPSNGLVLTTSKGVVLVDSSWDDKLTKELIEMVEKKFQKRVTDVIITHAHADRIGGMKTLKERGIKAHSTALTAELAKKSGYEEPLGDLQTITNLKFGNMKIETFYPGKGHTEDNIVVWLPQYNILAGGCLVKSASAKDLGNVADAYVNEWSTSIENVLTRYRNINAVVPGHGGVGDRDLLLHTLDLLK	ORF_OK	TRUE_HIT	lslaaa...........eekeeeekdelkiekladnvyvhtsykevegvgkvssngLvvidekevvlvDtpwteeqtekLldwiekklklkvkavistHfHeDrlGGlealnkkgiktyasalTnellkkegkeqakhsfkkeekltlgkekievfypGegHtkDNiVvwlpkekiLfGGClvksaeakslGnlgdAnveeWpksvekvkakypeakiVipGHgevgdkellehTlklle	VS---AvssvqaeqklkQKVIKNEAGTISISQLNKNVWVHTELGYFNGE-AVPSNGLVLTTSKGVVLVDSSWDDKLTKELIEMVEKKFQKRVTDVIITHAHADRIGGMKTLKERGIKAHSTALTAELAKKSGYEEPLGDLQTITNLKFGNMKIETFYPGKGHTEDNIVVWLPQYNILAGGCLVKSASAKDLGNVADAYVNEWSTSIENVLTRYRNINAVVPGHGGVGDRDLLLHTLDLLK	19	247	90.1186	11	4	0	257	Cluster_137	BcII_family_subclass_B1_metallo-beta-lactamase_NG_047224.1_cds_WP_012261328.1_1	Cluster_139	SP_Sec_SPI_	30-31	SP_Sec_SPI_	30-31	H_x_H_x_D	H_x_x_D_N	C	H	.
B1_163	GCF_002953455.1	562	562	Escherichia_coli	Bacteria-Pseudomonadota-Gammaproteobacteria-Enterobacterales-Enterobacteriaceae-Escherichia-	5104264	NZ_CP026474.1	class_B1	268	-	49589	50357	49581	50393	ATGGAATTGCCCAATATTATGCACCCGGTCGCGAAGCTGAGCACCGCATTAGCCGCTGCATTGATGCTGAGCGGGTGCATGCCCGGTGAAATCCGCCCGACGATTGGCCAGCAAATGGAAACTGGCGACCAACGGTTTGGCGATCTGGTTTTCCGCCAGCTCGCACCGAATGTCTGGCAGCACACTTCCTATCTCGACATGCCGGGTTTCGGGGCAGTCGCTTCCAACGGTTTGATCGTCAGGGATGGCGGCCGCGTGCTGTTGGTCGATACCGCCTGGACCGATGACCAGACCGCCCAGATCCTCAACTGGATCAAGCAGGAGATCAACCTGCCGGTCGCGCTGGCGGTGGTGACTCACGCGCATCAGGACAAGATGGGCGGTATGGACGCGCTGCAT…	WP_023408309.1	subclass_B1_metallo-beta-lactamase_NDM-5	MELPNIMHPVAKLSTALAAALMLSGCMPGEIRPTIGQQMETGDQRFGDLVFRQLAPNVWQHTSYLDMPGFGAVASNGLIVRDGGRVLLVDTAWTDDQTAQILNWIKQEINLPVALAVVTHAHQDKMGGMDALHAAGIATYANALSNQLAPQEGLVAAQHSLTFAANGWVEPATAPNFGPLKVFYPGPGHTSDNITVGIDGTDIAFGGCLIKDSKAKSLGNLGDADTEHYAASARAFGAAFPKASMIVMSHSAPDSRAAITHTARMADKLR	ORF_OK	TRUE_HIT	kllllllllllllslaaa.........eekeeeekdelkiekladnvyvhtsykevegvgkvssngLvvidekevvlvDtpwteeqtekLldwiekklklkvkavistHfHeDrlGGlealnkkgiktyasalTnellkkegkeqakhsfkkeek......ltlgkekievfypGegHtkDNiVvwlpkekiLfGGClvksaeakslGnlgdAnveeWpksvekvkakypeakiVipGHgevgdkellehTlkllek	KLSTALAAALMLSGCMPGeirptigqqMETGDQRFGDLVFRQLAPNVWQHTSYLDMPGFGAVASNGLIVRDGGRVLLVDTAWTDDQTAQILNWIKQEINLPVALAVVTHAHQDKMGGMDALHAAGIATYANALSNQLAPQEGLVAAQHSLTFAANgwvepaTAPNFGPLKVFYPGPGHTSDNITVGIDGTDIAFGGCLIKDSKAKSLGNLGDADTEHYAASARAFGAAFPKASMIVMSHSAPDSRAAITHTARMADK	7	248	95.2569	15	0	0	270	Cluster_118	subclass_B1_metallo-beta-lactamase_NDM-18_NG_052866.1_cds_WP_077064890.1_1	Cluster_120	LIPO_Sec_SPII_	25-26	LIPO_Sec_SPII_	25-26	H_x_H_x_D	H_x_x_D_N	C	H	.
B1_164	GCF_002954325.1	754435	754435	Aureicoccus_marinus	Bacteria-FCB_group-Bacteroidota_Chlorobiota_group-Bacteroidota-Flavobacteriia-Flavobacteriales-Flavobacteriaceae-Aureicoccus-	3052917	NZ_MQVX01000001.1	class_B1	191.3	+	26303	27014	26283	27020	ATGAAGCGCTGGGGAGTTTTGTTAGTCCTTTCTTTTCTGTTGATGGGCATGACCTGCCGCAAGTTGCCCCACCCCAAGGTGTATTCCACTGATCAGCTTGAAATTATACAACTCCGGCAAGGACTTTATTTGCATATCTCACAGATCGCCCTAAGCAATGGAAGTACTTTTCCGTGCAATGGTTTAATCTACACCGACCAGGGGGAAGCCGTGATTTTTGACAGCCCGGCTTCGGATGCGGGAACGGCCGAACTGCTGTCCTGGATAGAAGCACAACAACTAAAACTTAAGGCGGTTGTACCCAATCACTTTCACGAAGACTGTGTTCAGGGCTTACCCCAGATGATTGAGAAAGGGGCCTTGGTGTATTTGAATATTCGGACTTATGTGGAACTGGAT…	WP_104999988.1	subclass_B1_metallo-beta-lactamase	MKRWGVLLVLSFLLMGMTCRKLPHPKVYSTDQLEIIQLRQGLYLHISQIALSNGSTFPCNGLIYTDQGEAVIFDSPASDAGTAELLSWIEAQQLKLKAVVPNHFHEDCVQGLPQMIEKGALVYLNIRTYVELDEPKDNSPYRVFDSIQELKIGRKTIVNRYFGPAHTSDNIVSYLPAEKVLFGGCQVKAMGAGRGNVADANTALWPMQARAIKEAYPEAELIVPGHGGIGGSGLLDFTAELFSEK	ORF_OK	TRUE_HIT	lllllllllllslaaaeekeeeekdelkiekladnvyvhtsykevegvgkvssngLvvidekevvlvDtpwteeqtekLldwiekklklkvkavistHfHeDrlGGlealnkkgiktyasalTnellkkegkeqakhsfkkeekltlgkekievfypGegHtkDNiVvwlpkekiLfGGClvksaeakslGnlgdAnveeWpksvekvkakypeakiVipGHgevgdkellehTlkllek	LLVLSFLLMGMTCRKLPHPKVYSTDQLEIIQLRQGLYLHISQIALSNGSTFPCNGLIYTDQGEAVIFDSPASDAGTAELLSWIEA-QQLKLKAVVPNHFHEDCVQGLPQMIEKGALVYLNIRTYVELDEPKDNSPYRVFDSIQELKIGRKTIVNRYFGPAHTSDNIVSYLPAEKVLFGGCQVKAMGA-GRGNVADANTALWPMQARAIKEAYPEAELIVPGHGGIGGSGLLDFTAELFSE	9	248	94.4664	0	2	0	245	Cluster_808	CLUSTER_NOT_IN_NCBI_AMR_REF_DB	Cluster_812	LIPO_Sec_SPII_	18-19	LIPO_Sec_SPII_	18-19	H_x_H_x_D	H_x_x_D_N	C	H	.
B1_165	GCF_002954705.1	566293	566293	Aliivibrio_sifiae	Bacteria-Pseudomonadota-Gammaproteobacteria-Vibrionales-Vibrionaceae-Aliivibrio-	4462628	NZ_MSCO01000001.1	class_B1	271.6	+	1078777	1079500	1078769	1079509	ATGTTTAAAATTACTCTAGCGCTATTAAGTGCCGTTATTGGTTTTAATGCTTCAGCAGCCGATGCACCGGTTAAACCTCTTCAGTTTGAAGAAATTACGAATAATGTTTTTTTGGTTAAATCGTACCGTGAATTTAAAAATTTACAGAATCCGAATAAACCTATTTTAGTCGACGCTAATTCATTAGTGTATGTTGATGGAAAAGATGTGTATTTGATAGATACGCCATGGAATGCATCGAATATGCCTCAATTAATGACATGGATTGAAAACAGAGGGTTAACACTAAAGAAAACCATATTTTCTCATTTTCATGAAGATCAGACGGGTGGTTTAGAGTACTTGCAAGAGCATAATTTTGATACTTACGCTTCAACATTAACGAATACGTTTTTGAAA…	WP_181044563.1	ALI_family_subclass_B1_metallo-beta-lactamase	MFKITLALLSAVIGFNASAADAPVKPLQFEEITNNVFLVKSYREFKNLQNPNKPILVDANSLVYVDGKDVYLIDTPWNASNMPQLMTWIENRGLTLKKTIFSHFHEDQTGGLEYLQEHNFDTYASTLTNTFLKGDNKKATNHEFSDDNFVLLENKIEVFYPGAGHTKDNAVVWLPKEQVLLGGCLMRANEVNTIGWTGDADKKEWANSAQKVLTKYPKARFVVPGHGNVGEGTSIISHTVDIAENL	ORF_OK	TRUE_HIT	kllllllllllllslaaaeekeeeekdelkiekladnvyvhtsykevegv......gkvssngLvvidekevvlvDtpwteeqtekLldwiekklklkvkavistHfHeDrlGGlealnkkgiktyasalTnellkkegkeqakhsfkkeekltlgkekievfypGegHtkDNiVvwlpkekiLfGGClvksaeakslGnlgdAnveeWpksvekvkakypeakiVipGHgevgd.kellehTlklle	KI---TLALLSAV-IGFNASAADAPVKPLQFEEITNNVFLVKSYREFKNLqnpnkpILVDANSLVYVDGKDVYLIDTPWNASNMPQLMTWIEN-RGLTLKKTIFSHFHEDQTGGLEYLQEHNFDTYASTLTNTFLKGDNKKATNHEFSDDNF-VLLENKIEVFYPGAGHTKDNAVVWLPKEQVLLGGCLMRANEVNTIGWTGDADKKEWANSAQKVLTKYPKARFVVPGHGNVGEgTSIISHTVDIAE	7	247	94.8617	7	6	0	246	Cluster_730	subclass_B1_metallo-beta-lactamase_ALI-1_NG_057427.1_cds_WP_026025287.1_1	Cluster_735	SP_Sec_SPI_	19-20	SP_Sec_SPI_	19-20	H_x_H_x_D	H_x_x_D_N	C	H	.
B1_166	GCF_002954715.1	566293	566293	Aliivibrio_sifiae	Bacteria-Pseudomonadota-Gammaproteobacteria-Vibrionales-Vibrionaceae-Aliivibrio-	4743237	NZ_MSCP01000001.1	class_B1	271.9	-	1454692	1455421	1454684	1455424	ATGTTTAAAATTACGTTAGCGCTATTAAGTGCTGTTATTGGCTTTAATGCTTCTGCCGCAGATGAGTCAGTAAAACCACTTCAATTTGAAGAAATTACGAATAATGTTTTTTTGGTTAAATCATACCGTGAATTTAAAAATTTACAGAACCCAGATAAGCCTATTTTAATGGACGCTAACTCATTGGTCTATGTTGATGGGAAGGATGTGTATTTAATTGATACACCATGGAATGCATCGAACATGCCTCAACTGATGACGTGGATTGAAAACAGAGGCTTAACGCTAAAGAAAACCGTATTTTCTCATTTTCATGAAGATCAAACGGGTGGTTTAGAATATCTACAAGAGCATAATTTTGATACCTATGCGTCTGCATTAACCAACACATTTTTGAAA…	WP_172794759.1	ALI_family_subclass_B1_metallo-beta-lactamase	MFKITLALLSAVIGFNASAADESVKPLQFEEITNNVFLVKSYREFKNLQNPDKPILMDANSLVYVDGKDVYLIDTPWNASNMPQLMTWIENRGLTLKKTVFSHFHEDQTGGLEYLQEHNFDTYASALTNTFLKGDNKKATNHQFSDDNFVLLENKIEVFYPGAGHTKDNAVVWLPKEQVLLGGCLMRANEVNTIGWTGDADKKEWANSAQKVLTKYPEARFVVPGHGNVGKGTSIISHTVDIAESL	ORF_OK	TRUE_HIT	llllllllllllslaaaeekeeeekdelkiekladnvyvhtsykevegv......gkvssngLvvidekevvlvDtpwteeqtekLldwiekklklkvkavistHfHeDrlGGlealnkkgiktyasalTnellkkegkeqakhsfkkeekltlgkekievfypGegHtkDNiVvwlpkekiLfGGClvksaeakslGnlgdAnveeWpksvekvkakypeakiVipGHgevgd.kellehTlklle	MFKITLALLSAVIG-FNASAADESVKPLQFEEITNNVFLVKSYREFKNLqnpdkpILMDANSLVYVDGKDVYLIDTPWNASNMPQLMTWIEN-RGLTLKKTVFSHFHEDQTGGLEYLQEHNFDTYASALTNTFLKGDNKKATNHQFSDDNF-VLLENKIEVFYPGAGHTKDNAVVWLPKEQVLLGGCLMRANEVNTIGWTGDADKKEWANSAQKVLTKYPEARFVVPGHGNVGKgTSIISHTVDIAE	8	247	94.4664	7	3	0	246	Cluster_730	subclass_B1_metallo-beta-lactamase_ALI-1_NG_057427.1_cds_WP_026025287.1_1	Cluster_735	SP_Sec_SPI_	19-20	SP_Sec_SPI_	19-20	H_x_H_x_D	H_x_x_D_N	C	H	.
B1_167	GCF_002964605.1	2078660	2078660	Vallitalea_okinawensis	Bacteria-Terrabacteria_group-Bacillota-Clostridia-Lachnospirales-Vallitaleaceae-Vallitalea-	5859119	NZ_PQDH01000006.1	class_B1	227.5	-	188896	189724	188162	189745	ATGAAGAAAATTATCTTACTATTTATCACACTACTTATTACAATGATTAGCTTATCAGCGTGCGACAATGTAGATCAAGAAGCTGATTCTATTACAATATCAGATTTTTCAGAACCATATAGAATAAGTGATGATCTTACTATTGAAAAAGTTCAAGAACAAGTTTATGTGGTTAATCATGAATTCCCATGGCCGGCCAACTCACTTATTGTTGAAATGGACAATGGAGAGTTAGTTTTAGTAGATACGCCTTATACACCGGAGGCCACCCAATTGCTGCTAGAATGGATGGAAGAAGAATTTGGTGAAAGAAGTACCATAGCTATCAATACTCATTTTCATTTTGATAATTTAGGTGGTAATCAAGCACTAATTAATAATGATATCCCTATTTATGGT…	WP_105617255.1	class_D_beta-lactamase	MKKIILLFITLLITMISLSACDNVDQEADSITISDFSEPYRISDDLTIEKVQEQVYVVNHEFPWPANSLIVEMDNGELVLVDTPYTPEATQLLLEWMEEEFGERSTIAINTHFHFDNLGGNQALINNDIPIYGSSMIKEMIEERGEAARQLMLSWLSDPKDEDYKKKYEELEYIVPTEVFNIQDGMTLTFDKEVVEIFYPGESHSLDAVVVYFPDKKVLFGGCMMKSLDDYTLGNTADANIKEWPKSVKKVNEEFSDVGVVIPGHGQWGNRELITHTINLFDIEENTTKVIEQDLSQYFQGYEGCFILYDSSGHEYVVYNEEKSQKQIPPCSTFKIYHSLIGLETGVLEDQNTVFQWDGTEQPIESWNQDHTLKTAVANSVVWYFQQVATEIGEDRMAS…	ORF_OK	TRUE_HIT	kllllllllllllslaaa............eekeeeekdelkiekladnvyvhtsykevegvgkvssngLvv.idekevvlvDtpwteeqtekLldwiekklklkvkavistHfHeDrlGGlealnkkgiktyasalTnellkkegkeqakh..sfkkeek...........................ltlgkekievfypGegHtkDNiVvwlpkekiLfGGClvksaeakslGnlgdAnveeWpksvekvkakypeakiVipGHgevgdkellehTlkllek	LFITLLITMISLSACD-NvdqeadsitisdFSEPYRISDDLTIEKVQEQVYVVNHE-----F-PWPANSLIVeMDNGELVLVDTPYTPEATQLLLEWMEEEFGERSTIAINTHFHFDNLGGNQALINNDIPIYGSSMIKEMIEERGEAARQLmlSWLSDPKdedykkkyeeleyivptevfniqdgmtLTFDKEVVEIFYPGESHSLDAVVVYFPDKKVLFGGCMMKSLDDYTLGNTADANIKEWPKSVKKVNEEFSDVGVVIPGHGQWGNRELITHTINLFDI	7	248	95.2569	42	7	0	527	Cluster_4	CLUSTER_NOT_IN_NCBI_AMR_REF_DB	Cluster_1	LIPO_Sec_SPII_	20-21	LIPO_Sec_SPII_	20-21	H_x_H_x_D	H_x_x_D_A	C	H	.
B1_168	GCF_002964665.1	2077097	2077097	Pseudoalteromonas_sp_T1lg23B	Bacteria-Pseudomonadota-Gammaproteobacteria-Alteromonadales-Pseudoalteromonadaceae-Pseudoalteromonas-unclassified_Pseudoalteromonas-	4584781	NZ_PQBZ01000042.1	class_B1	263.8	+	512141	512849	512136	512861	ATGAAAAAAATAATCCTTTTTGTGTTACTTCTACCGTTTATGCTGCAGGCCAATGTTGAGTCAACAACACTTGAAATGCATCCTATAACAAAAAATATCTATCAACATATTTCCTATCTCGATGTACCACCGTGGGGACGCGTTGCAGCAAATGGCCTCGTAGCTGTAATTGAACAAGACGCTTATATTATTGATACACCGTGGACTATTGCAGATACAAAACAATTAGTTGCTTGGATAAAAGCACAAGGACTAACTCCCAAAGCGGCTGTGATCAGCCATTTTCACCAAGATGCCAGCAACGGTATTGCGTATTTAAACGAAGTAGGCATCGACACCTATGCAAGTACGCTCACCAATTCTTTGTTGGCCAAACAAAACCTGCCACAGTCAAATATT…	WP_105169816.1	subclass_B1_metallo-beta-lactamase	MKKIILFVLLLPFMLQANVESTTLEMHPITKNIYQHISYLDVPPWGRVAANGLVAVIEQDAYIIDTPWTIADTKQLVAWIKAQGLTPKAAVISHFHQDASNGIAYLNEVGIDTYASTLTNSLLAKQNLPQSNISYSDQSLTIANGTIEIFAPGAGHSSDNIVVWFAQQKMLFGGCFVKSLESTSLGNIADASIDSWSISINNVLKKYPEIKQVVPGHGKIGDVSLLAHTAKLVSKQAHRTH	ORF_OK	TRUE_HIT	rkllllllllllllslaaaeekeeeekdelkiekladnvyvhtsykevegvgkvssngLvvidekevvlvDtpwteeqtekLldwiekklklkvkavistHfHeDrlGGlealnkkgiktyasalTnellkkegkeqakhsfkkeekltlgkekievfypGegHtkDNiVvwlpkekiLfGGClvksaeakslGnlgdAnveeWpksvekvkakypeakiVipGHgevgdkellehTlkllekakk	KKII---LFVLLLPFML----QANVESTTLEMHPITKNIYQHISYLDVPPWGRVAANGLVAVIEQDAYIIDTPWTIADTKQLVAWIKA-QGLTPKAAVISHFHQDASNGIAYLNEVGIDTYASTLTNSLLAKQNLPQSNISYSDQS-LTIANGTIEIFAPGAGHSSDNIVVWFAQQKMLFGGCFVKSLESTSLGNIADASIDSWSISINNVLKKYPEIKQVVPGHGKIGDVSLLAHTAKLVSKQAH	6	251	96.8379	0	9	0	241	Cluster_1022	CLUSTER_NOT_IN_NCBI_AMR_REF_DB	Cluster_1012	SP_Sec_SPI_	17-18	SP_Sec_SPI_	21-22	H_x_H_x_D	H_x_x_D_N	C	H	.
B1_169	GCF_002967795.2	573	573	Klebsiella_pneumoniae	Bacteria-Pseudomonadota-Gammaproteobacteria-Enterobacterales-Enterobacteriaceae-Klebsiella_Raoultella_group-Klebsiella-	5915658	NZ_CP053365.1	class_B1	266.6	+	74383	75151	74348	75160	ATGGAATTGCCCAATATTATGCACCCGGTCGCGAAGCTGAGCACCGCATTAGCCGCTGCATTGATGCTGAGCGGGTGCATGCCCGGTGAAATCCGCCCGACGATTGGCCAGCAAATGGAAACTGGCGACCAACGGTTTGGCGATCTGGTTTTCCGCCAGCTCGCACCGAATGTCTGGCAGCACACTTCCTATCTCGACATGCCGGGTTTCGGGGCAGTCGCTTCCAACGGTTTGATCGTCAGGGATGGCGGCCGCGTGCTGGTGGTCGATACCGCCTGGACCGATGACCAGACCGCCCAGATCCTCAACTGGATCAAGCAGGAGATCAACCTGCCGGTCGCGCTGGCGGTGGTGACTCACGCGCATCAGGACAAGATGGGCGGTATGGACGCGCTGCAT…	WP_004201164.1	subclass_B1_metallo-beta-lactamase_NDM-1	MELPNIMHPVAKLSTALAAALMLSGCMPGEIRPTIGQQMETGDQRFGDLVFRQLAPNVWQHTSYLDMPGFGAVASNGLIVRDGGRVLVVDTAWTDDQTAQILNWIKQEINLPVALAVVTHAHQDKMGGMDALHAAGIATYANALSNQLAPQEGMVAAQHSLTFAANGWVEPATAPNFGPLKVFYPGPGHTSDNITVGIDGTDIAFGGCLIKDSKAKSLGNLGDADTEHYAASARAFGAAFPKASMIVMSHSAPDSRAAITHTARMADKLR	ORF_OK	TRUE_HIT	kllllllllllllslaaa.........eekeeeekdelkiekladnvyvhtsykevegvgkvssngLvvidekevvlvDtpwteeqtekLldwiekklklkvkavistHfHeDrlGGlealnkkgiktyasalTnellkkegkeqakhsfkkeek......ltlgkekievfypGegHtkDNiVvwlpkekiLfGGClvksaeakslGnlgdAnveeWpksvekvkakypeakiVipGHgevgdkellehTlkllek	KLSTALAAALMLSGCMPGeirptigqqMETGDQRFGDLVFRQLAPNVWQHTSYLDMPGFGAVASNGLIVRDGGRVLVVDTAWTDDQTAQILNWIKQEINLPVALAVVTHAHQDKMGGMDALHAAGIATYANALSNQLAPQEGMVAAQHSLTFAANgwvepaTAPNFGPLKVFYPGPGHTSDNITVGIDGTDIAFGGCLIKDSKAKSLGNLGDADTEHYAASARAFGAAFPKASMIVMSHSAPDSRAAITHTARMADK	7	248	95.2569	15	0	0	270	Cluster_118	subclass_B1_metallo-beta-lactamase_NDM-18_NG_052866.1_cds_WP_077064890.1_1	Cluster_120	LIPO_Sec_SPII_	25-26	LIPO_Sec_SPII_	25-26	H_x_H_x_D	H_x_x_D_N	C	H	.
B1_17	GCF_002846575.1	428988	428988	Flavobacterium_lindanitolerans	Bacteria-FCB_group-Bacteroidota_Chlorobiota_group-Bacteroidota-Flavobacteriia-Flavobacteriales-Flavobacteriaceae-Flavobacterium-	3722747	NZ_PJND01000009.1	class_B1	270.9	+	288477	289218	288472	289224	ATGATTAAAAATATCTTTACTGCTATTTTATTCTATTTTATTGCCATAAGTTGTAATTCCCAGAAAAAAGACAATTTTAAAGCAAAAGAAATTTATAAATCTGATAATCTGACCATTACTCAAATATCAGAAAATTCTTTTATCCATACTTCATTTAAACAAACCAATGATTTTGGCAATGTTCCCTGTAATGGACTCATAGTAAGAGACAATAATGAAACTATTGTTTTTGATACGCCAGTCAATAACACTATTTCAGAAGAATTAATAAAATGGATAAATGAGACTCTTCATTCAAAAATTAATGCCATTATTCCAACTCACTTTCATGACGACTGTCTTGGAGGATTAGAAGCATTTCATAATCACAATATTCCTTCTTATGCCTATATTAAAACC…	WP_101472671.1	CHM_family_subclass_B1_metallo-beta-lactamase	MIKNIFTAILFYFIAISCNSQKKDNFKAKEIYKSDNLTITQISENSFIHTSFKQTNDFGNVPCNGLIVRDNNETIVFDTPVNNTISEELIKWINETLHSKINAIIPTHFHDDCLGGLEAFHNHNIPSYAYIKTVELAKENNFTIPKNSFNDSVILKVGDKETITKFFGEGHTKDNVVGYFPSENILFGGCLLKELKASKGYLGDANISAWSNTVEKVKREYPDVKIIVPGHGKYGNHELLDYTIKLFKTQ	ORF_OK	TRUE_HIT	lrkllllllllllllslaaa.....eekeeeekdelkiekladnvyvhtsykevegvgkvssngLvvidekevvlvDtpwteeqtekLldwiekklklkvkavistHfHeDrlGGlealnkkgiktyasalTnellkkegkeqakhsfkkeekltlgkekievfypGegHtkDNiVvwlpkekiLfGGClvksaeakslGnlgdAnveeWpksvekvkakypeakiVipGHgevgdkellehTlkllek	IKNIFTAILFYFIAISCNSQkkdnfKAKEIYKSDNLTITQISENSFIHTSFKQTNDFGNVPCNGLIVRDNNETIVFDTPVNNTISEELIKWINETLHSKINAIIPTHFHDDCLGGLEAFHNHNIPSYAYIKTVELAKENNFTIPKNSFNDSVILKVGDKETITKFFGEGHTKDNVVGYFPSENILFGGCLLKELKA-SKGYLGDANISAWSNTVEKVKREYPDVKIIVPGHGKYGNHELLDYTIKLFKT	5	248	96.0474	5	1	0	250	Cluster_530	CLUSTER_NOT_IN_NCBI_AMR_REF_DB	Cluster_539	LIPO_Sec_SPII_	17-18	LIPO_Sec_SPII_	17-18	H_x_H_x_D	H_x_x_D_N	C	H	.
B1_170	GCF_002967855.2	562	562	Escherichia_coli	Bacteria-Pseudomonadota-Gammaproteobacteria-Enterobacterales-Enterobacteriaceae-Escherichia-	4876258	NZ_CP086341.1	class_B1	269.3	-	39155	39923	39147	39959	ATGGAATTGCCCAATATTATGCACCCGGTCGCGAAGCTGAGCACCGCATTAGCCGCTGCATTGATGCTGAGCGGGTGCATGCCCGGTGAAATCCGCCCGACGATTGGCCAGCAAATGGAAACTGGCGACCAACGGTTTGGCGATCTGGTTTTCCGCCAGCTCGCACCGAATGTCTGGCAGCACACTTCCTATCTCGACATGCCGGGTTTCGGGGCAGTCGCTTCCAACGGTTTGATCGTCAGGGATGGCGGCCGCGTGCTGTTGGTCGATACCGCCTGGACCGATGACCAGACCGCCCAGATCCTCAACTGGATCAAGCAGGAGATCAACCTGCCGGTCGCGCTGGCGGTGGTGACTCACGCGCATCAGGACAAGATGGGCGGTATGGACGCGCTGCAT…	WP_023408309.1	subclass_B1_metallo-beta-lactamase_NDM-5	MELPNIMHPVAKLSTALAAALMLSGCMPGEIRPTIGQQMETGDQRFGDLVFRQLAPNVWQHTSYLDMPGFGAVASNGLIVRDGGRVLLVDTAWTDDQTAQILNWIKQEINLPVALAVVTHAHQDKMGGMDALHAAGIATYANALSNQLAPQEGLVAAQHSLTFAANGWVEPATAPNFGPLKVFYPGPGHTSDNITVGIDGTDIAFGGCLIKDSKAKSLGNLGDADTEHYAASARAFGAAFPKASMIVMSHSAPDSRAAITHTARMADKLR	ORF_OK	TRUE_HIT	kllllllllllllslaaa.........eekeeeekdelkiekladnvyvhtsykevegvgkvssngLvvidekevvlvDtpwteeqtekLldwiekklklkvkavistHfHeDrlGGlealnkkgiktyasalTnellkkegkeqakhsfkkeek......ltlgkekievfypGegHtkDNiVvwlpkekiLfGGClvksaeakslGnlgdAnveeWpksvekvkakypeakiVipGHgevgdkellehTlkllek	KLSTALAAALMLSGCMPGeirptigqqMETGDQRFGDLVFRQLAPNVWQHTSYLDMPGFGAVASNGLIVRDGGRVLLVDTAWTDDQTAQILNWIKQEINLPVALAVVTHAHQDKMGGMDALHAAGIATYANALSNQLAPQEGLVAAQHSLTFAANgwvepaTAPNFGPLKVFYPGPGHTSDNITVGIDGTDIAFGGCLIKDSKAKSLGNLGDADTEHYAASARAFGAAFPKASMIVMSHSAPDSRAAITHTARMADK	7	248	95.2569	15	0	0	270	Cluster_118	subclass_B1_metallo-beta-lactamase_NDM-18_NG_052866.1_cds_WP_077064890.1_1	Cluster_120	LIPO_Sec_SPII_	25-26	LIPO_Sec_SPII_	25-26	H_x_H_x_D	H_x_x_D_N	C	H	.
B1_171	GCF_002967865.3	562	562	Escherichia_coli	Bacteria-Pseudomonadota-Gammaproteobacteria-Enterobacterales-Enterobacteriaceae-Escherichia-	5259742	NZ_PUJO03000011.1	class_B1	269.3	-	43103	43871	43095	43907	ATGGAATTGCCCAATATTATGCACCCGGTCGCGAAGCTGAGCACCGCATTAGCCGCTGCATTGATGCTGAGCGGGTGCATGCCCGGTGAAATCCGCCCGACGATTGGCCAGCAAATGGAAACTGGCGACCAACGGTTTGGCGATCTGGTTTTCCGCCAGCTCGCACCGAATGTCTGGCAGCACACTTCCTATCTCGACATGCCGGGTTTCGGGGCAGTCGCTTCCAACGGTTTGATCGTCAGGGATGGCGGCCGCGTGCTGTTGGTCGATACCGCCTGGACCGATGACCAGACCGCCCAGATCCTCAACTGGATCAAGCAGGAGATCAACCTGCCGGTCGCGCTGGCGGTGGTGACTCACGCGCATCAGGACAAGATGGGCGGTATGGACGCGCTGCAT…	WP_023408309.1	subclass_B1_metallo-beta-lactamase_NDM-5	MELPNIMHPVAKLSTALAAALMLSGCMPGEIRPTIGQQMETGDQRFGDLVFRQLAPNVWQHTSYLDMPGFGAVASNGLIVRDGGRVLLVDTAWTDDQTAQILNWIKQEINLPVALAVVTHAHQDKMGGMDALHAAGIATYANALSNQLAPQEGLVAAQHSLTFAANGWVEPATAPNFGPLKVFYPGPGHTSDNITVGIDGTDIAFGGCLIKDSKAKSLGNLGDADTEHYAASARAFGAAFPKASMIVMSHSAPDSRAAITHTARMADKLR	ORF_OK	TRUE_HIT	kllllllllllllslaaa.........eekeeeekdelkiekladnvyvhtsykevegvgkvssngLvvidekevvlvDtpwteeqtekLldwiekklklkvkavistHfHeDrlGGlealnkkgiktyasalTnellkkegkeqakhsfkkeek......ltlgkekievfypGegHtkDNiVvwlpkekiLfGGClvksaeakslGnlgdAnveeWpksvekvkakypeakiVipGHgevgdkellehTlkllek	KLSTALAAALMLSGCMPGeirptigqqMETGDQRFGDLVFRQLAPNVWQHTSYLDMPGFGAVASNGLIVRDGGRVLLVDTAWTDDQTAQILNWIKQEINLPVALAVVTHAHQDKMGGMDALHAAGIATYANALSNQLAPQEGLVAAQHSLTFAANgwvepaTAPNFGPLKVFYPGPGHTSDNITVGIDGTDIAFGGCLIKDSKAKSLGNLGDADTEHYAASARAFGAAFPKASMIVMSHSAPDSRAAITHTARMADK	7	248	95.2569	15	0	0	270	Cluster_118	subclass_B1_metallo-beta-lactamase_NDM-18_NG_052866.1_cds_WP_077064890.1_1	Cluster_120	LIPO_Sec_SPII_	25-26	LIPO_Sec_SPII_	25-26	H_x_H_x_D	H_x_x_D_N	C	H	.
B1_172	GCF_002967875.2	562	562	Escherichia_coli	Bacteria-Pseudomonadota-Gammaproteobacteria-Enterobacterales-Enterobacteriaceae-Escherichia-	5325373	NZ_CP086335.1	class_B1	269.3	-	39073	39841	39065	39877	ATGGAATTGCCCAATATTATGCACCCGGTCGCGAAGCTGAGCACCGCATTAGCCGCTGCATTGATGCTGAGCGGGTGCATGCCCGGTGAAATCCGCCCGACGATTGGCCAGCAAATGGAAACTGGCGACCAACGGTTTGGCGATCTGGTTTTCCGCCAGCTCGCACCGAATGTCTGGCAGCACACTTCCTATCTCGACATGCCGGGTTTCGGGGCAGTCGCTTCCAACGGTTTGATCGTCAGGGATGGCGGCCGCGTGCTGTTGGTCGATACCGCCTGGACCGATGACCAGACCGCCCAGATCCTCAACTGGATCAAGCAGGAGATCAACCTGCCGGTCGCGCTGGCGGTGGTGACTCACGCGCATCAGGACAAGATGGGCGGTATGGACGCGCTGCAT…	WP_023408309.1	subclass_B1_metallo-beta-lactamase_NDM-5	MELPNIMHPVAKLSTALAAALMLSGCMPGEIRPTIGQQMETGDQRFGDLVFRQLAPNVWQHTSYLDMPGFGAVASNGLIVRDGGRVLLVDTAWTDDQTAQILNWIKQEINLPVALAVVTHAHQDKMGGMDALHAAGIATYANALSNQLAPQEGLVAAQHSLTFAANGWVEPATAPNFGPLKVFYPGPGHTSDNITVGIDGTDIAFGGCLIKDSKAKSLGNLGDADTEHYAASARAFGAAFPKASMIVMSHSAPDSRAAITHTARMADKLR	ORF_OK	TRUE_HIT	kllllllllllllslaaa.........eekeeeekdelkiekladnvyvhtsykevegvgkvssngLvvidekevvlvDtpwteeqtekLldwiekklklkvkavistHfHeDrlGGlealnkkgiktyasalTnellkkegkeqakhsfkkeek......ltlgkekievfypGegHtkDNiVvwlpkekiLfGGClvksaeakslGnlgdAnveeWpksvekvkakypeakiVipGHgevgdkellehTlkllek	KLSTALAAALMLSGCMPGeirptigqqMETGDQRFGDLVFRQLAPNVWQHTSYLDMPGFGAVASNGLIVRDGGRVLLVDTAWTDDQTAQILNWIKQEINLPVALAVVTHAHQDKMGGMDALHAAGIATYANALSNQLAPQEGLVAAQHSLTFAANgwvepaTAPNFGPLKVFYPGPGHTSDNITVGIDGTDIAFGGCLIKDSKAKSLGNLGDADTEHYAASARAFGAAFPKASMIVMSHSAPDSRAAITHTARMADK	7	248	95.2569	15	0	0	270	Cluster_118	subclass_B1_metallo-beta-lactamase_NDM-18_NG_052866.1_cds_WP_077064890.1_1	Cluster_120	LIPO_Sec_SPII_	25-26	LIPO_Sec_SPII_	25-26	H_x_H_x_D	H_x_x_D_N	C	H	.
B1_173	GCF_002967885.2	562	562	Escherichia_coli	Bacteria-Pseudomonadota-Gammaproteobacteria-Enterobacterales-Enterobacteriaceae-Escherichia-	4854424	NZ_CP086337.1	class_B1	269.3	-	39155	39923	39147	39959	ATGGAATTGCCCAATATTATGCACCCGGTCGCGAAGCTGAGCACCGCATTAGCCGCTGCATTGATGCTGAGCGGGTGCATGCCCGGTGAAATCCGCCCGACGATTGGCCAGCAAATGGAAACTGGCGACCAACGGTTTGGCGATCTGGTTTTCCGCCAGCTCGCACCGAATGTCTGGCAGCACACTTCCTATCTCGACATGCCGGGTTTCGGGGCAGTCGCTTCCAACGGTTTGATCGTCAGGGATGGCGGCCGCGTGCTGTTGGTCGATACCGCCTGGACCGATGACCAGACCGCCCAGATCCTCAACTGGATCAAGCAGGAGATCAACCTGCCGGTCGCGCTGGCGGTGGTGACTCACGCGCATCAGGACAAGATGGGCGGTATGGACGCGCTGCAT…	WP_023408309.1	subclass_B1_metallo-beta-lactamase_NDM-5	MELPNIMHPVAKLSTALAAALMLSGCMPGEIRPTIGQQMETGDQRFGDLVFRQLAPNVWQHTSYLDMPGFGAVASNGLIVRDGGRVLLVDTAWTDDQTAQILNWIKQEINLPVALAVVTHAHQDKMGGMDALHAAGIATYANALSNQLAPQEGLVAAQHSLTFAANGWVEPATAPNFGPLKVFYPGPGHTSDNITVGIDGTDIAFGGCLIKDSKAKSLGNLGDADTEHYAASARAFGAAFPKASMIVMSHSAPDSRAAITHTARMADKLR	ORF_OK	TRUE_HIT	kllllllllllllslaaa.........eekeeeekdelkiekladnvyvhtsykevegvgkvssngLvvidekevvlvDtpwteeqtekLldwiekklklkvkavistHfHeDrlGGlealnkkgiktyasalTnellkkegkeqakhsfkkeek......ltlgkekievfypGegHtkDNiVvwlpkekiLfGGClvksaeakslGnlgdAnveeWpksvekvkakypeakiVipGHgevgdkellehTlkllek	KLSTALAAALMLSGCMPGeirptigqqMETGDQRFGDLVFRQLAPNVWQHTSYLDMPGFGAVASNGLIVRDGGRVLLVDTAWTDDQTAQILNWIKQEINLPVALAVVTHAHQDKMGGMDALHAAGIATYANALSNQLAPQEGLVAAQHSLTFAANgwvepaTAPNFGPLKVFYPGPGHTSDNITVGIDGTDIAFGGCLIKDSKAKSLGNLGDADTEHYAASARAFGAAFPKASMIVMSHSAPDSRAAITHTARMADK	7	248	95.2569	15	0	0	270	Cluster_118	subclass_B1_metallo-beta-lactamase_NDM-18_NG_052866.1_cds_WP_077064890.1_1	Cluster_120	LIPO_Sec_SPII_	25-26	LIPO_Sec_SPII_	25-26	H_x_H_x_D	H_x_x_D_N	C	H	.
B1_174	GCF_002967935.2	562	562	Escherichia_coli	Bacteria-Pseudomonadota-Gammaproteobacteria-Enterobacterales-Enterobacteriaceae-Escherichia-	4879679	NZ_CP086343.1	class_B1	269.3	+	40446	41214	40411	41223	ATGGAATTGCCCAATATTATGCACCCGGTCGCGAAGCTGAGCACCGCATTAGCCGCTGCATTGATGCTGAGCGGGTGCATGCCCGGTGAAATCCGCCCGACGATTGGCCAGCAAATGGAAACTGGCGACCAACGGTTTGGCGATCTGGTTTTCCGCCAGCTCGCACCGAATGTCTGGCAGCACACTTCCTATCTCGACATGCCGGGTTTCGGGGCAGTCGCTTCCAACGGTTTGATCGTCAGGGATGGCGGCCGCGTGCTGTTGGTCGATACCGCCTGGACCGATGACCAGACCGCCCAGATCCTCAACTGGATCAAGCAGGAGATCAACCTGCCGGTCGCGCTGGCGGTGGTGACTCACGCGCATCAGGACAAGATGGGCGGTATGGACGCGCTGCAT…	WP_023408309.1	subclass_B1_metallo-beta-lactamase_NDM-5	MELPNIMHPVAKLSTALAAALMLSGCMPGEIRPTIGQQMETGDQRFGDLVFRQLAPNVWQHTSYLDMPGFGAVASNGLIVRDGGRVLLVDTAWTDDQTAQILNWIKQEINLPVALAVVTHAHQDKMGGMDALHAAGIATYANALSNQLAPQEGLVAAQHSLTFAANGWVEPATAPNFGPLKVFYPGPGHTSDNITVGIDGTDIAFGGCLIKDSKAKSLGNLGDADTEHYAASARAFGAAFPKASMIVMSHSAPDSRAAITHTARMADKLR	ORF_OK	TRUE_HIT	kllllllllllllslaaa.........eekeeeekdelkiekladnvyvhtsykevegvgkvssngLvvidekevvlvDtpwteeqtekLldwiekklklkvkavistHfHeDrlGGlealnkkgiktyasalTnellkkegkeqakhsfkkeek......ltlgkekievfypGegHtkDNiVvwlpkekiLfGGClvksaeakslGnlgdAnveeWpksvekvkakypeakiVipGHgevgdkellehTlkllek	KLSTALAAALMLSGCMPGeirptigqqMETGDQRFGDLVFRQLAPNVWQHTSYLDMPGFGAVASNGLIVRDGGRVLLVDTAWTDDQTAQILNWIKQEINLPVALAVVTHAHQDKMGGMDALHAAGIATYANALSNQLAPQEGLVAAQHSLTFAANgwvepaTAPNFGPLKVFYPGPGHTSDNITVGIDGTDIAFGGCLIKDSKAKSLGNLGDADTEHYAASARAFGAAFPKASMIVMSHSAPDSRAAITHTARMADK	7	248	95.2569	15	0	0	270	Cluster_118	subclass_B1_metallo-beta-lactamase_NDM-18_NG_052866.1_cds_WP_077064890.1_1	Cluster_120	LIPO_Sec_SPII_	25-26	LIPO_Sec_SPII_	25-26	H_x_H_x_D	H_x_x_D_N	C	H	.
B1_175	GCF_002967955.2	562	562	Escherichia_coli	Bacteria-Pseudomonadota-Gammaproteobacteria-Enterobacterales-Enterobacteriaceae-Escherichia-	4848130	NZ_CP086339.1	class_B1	269.3	-	39073	39841	39065	39877	ATGGAATTGCCCAATATTATGCACCCGGTCGCGAAGCTGAGCACCGCATTAGCCGCTGCATTGATGCTGAGCGGGTGCATGCCCGGTGAAATCCGCCCGACGATTGGCCAGCAAATGGAAACTGGCGACCAACGGTTTGGCGATCTGGTTTTCCGCCAGCTCGCACCGAATGTCTGGCAGCACACTTCCTATCTCGACATGCCGGGTTTCGGGGCAGTCGCTTCCAACGGTTTGATCGTCAGGGATGGCGGCCGCGTGCTGTTGGTCGATACCGCCTGGACCGATGACCAGACCGCCCAGATCCTCAACTGGATCAAGCAGGAGATCAACCTGCCGGTCGCGCTGGCGGTGGTGACTCACGCGCATCAGGACAAGATGGGCGGTATGGACGCGCTGCAT…	WP_023408309.1	subclass_B1_metallo-beta-lactamase_NDM-5	MELPNIMHPVAKLSTALAAALMLSGCMPGEIRPTIGQQMETGDQRFGDLVFRQLAPNVWQHTSYLDMPGFGAVASNGLIVRDGGRVLLVDTAWTDDQTAQILNWIKQEINLPVALAVVTHAHQDKMGGMDALHAAGIATYANALSNQLAPQEGLVAAQHSLTFAANGWVEPATAPNFGPLKVFYPGPGHTSDNITVGIDGTDIAFGGCLIKDSKAKSLGNLGDADTEHYAASARAFGAAFPKASMIVMSHSAPDSRAAITHTARMADKLR	ORF_OK	TRUE_HIT	kllllllllllllslaaa.........eekeeeekdelkiekladnvyvhtsykevegvgkvssngLvvidekevvlvDtpwteeqtekLldwiekklklkvkavistHfHeDrlGGlealnkkgiktyasalTnellkkegkeqakhsfkkeek......ltlgkekievfypGegHtkDNiVvwlpkekiLfGGClvksaeakslGnlgdAnveeWpksvekvkakypeakiVipGHgevgdkellehTlkllek	KLSTALAAALMLSGCMPGeirptigqqMETGDQRFGDLVFRQLAPNVWQHTSYLDMPGFGAVASNGLIVRDGGRVLLVDTAWTDDQTAQILNWIKQEINLPVALAVVTHAHQDKMGGMDALHAAGIATYANALSNQLAPQEGLVAAQHSLTFAANgwvepaTAPNFGPLKVFYPGPGHTSDNITVGIDGTDIAFGGCLIKDSKAKSLGNLGDADTEHYAASARAFGAAFPKASMIVMSHSAPDSRAAITHTARMADK	7	248	95.2569	15	0	0	270	Cluster_118	subclass_B1_metallo-beta-lactamase_NDM-18_NG_052866.1_cds_WP_077064890.1_1	Cluster_120	LIPO_Sec_SPII_	25-26	LIPO_Sec_SPII_	25-26	H_x_H_x_D	H_x_x_D_N	C	H	.
B1_176	GCF_002967975.2	562	562	Escherichia_coli	Bacteria-Pseudomonadota-Gammaproteobacteria-Enterobacterales-Enterobacteriaceae-Escherichia-	4878739	NZ_CP086557.1	class_B1	269.3	+	40446	41214	40411	41223	ATGGAATTGCCCAATATTATGCACCCGGTCGCGAAGCTGAGCACCGCATTAGCCGCTGCATTGATGCTGAGCGGGTGCATGCCCGGTGAAATCCGCCCGACGATTGGCCAGCAAATGGAAACTGGCGACCAACGGTTTGGCGATCTGGTTTTCCGCCAGCTCGCACCGAATGTCTGGCAGCACACTTCCTATCTCGACATGCCGGGTTTCGGGGCAGTCGCTTCCAACGGTTTGATCGTCAGGGATGGCGGCCGCGTGCTGTTGGTCGATACCGCCTGGACCGATGACCAGACCGCCCAGATCCTCAACTGGATCAAGCAGGAGATCAACCTGCCGGTCGCGCTGGCGGTGGTGACTCACGCGCATCAGGACAAGATGGGCGGTATGGACGCGCTGCAT…	WP_023408309.1	subclass_B1_metallo-beta-lactamase_NDM-5	MELPNIMHPVAKLSTALAAALMLSGCMPGEIRPTIGQQMETGDQRFGDLVFRQLAPNVWQHTSYLDMPGFGAVASNGLIVRDGGRVLLVDTAWTDDQTAQILNWIKQEINLPVALAVVTHAHQDKMGGMDALHAAGIATYANALSNQLAPQEGLVAAQHSLTFAANGWVEPATAPNFGPLKVFYPGPGHTSDNITVGIDGTDIAFGGCLIKDSKAKSLGNLGDADTEHYAASARAFGAAFPKASMIVMSHSAPDSRAAITHTARMADKLR	ORF_OK	TRUE_HIT	kllllllllllllslaaa.........eekeeeekdelkiekladnvyvhtsykevegvgkvssngLvvidekevvlvDtpwteeqtekLldwiekklklkvkavistHfHeDrlGGlealnkkgiktyasalTnellkkegkeqakhsfkkeek......ltlgkekievfypGegHtkDNiVvwlpkekiLfGGClvksaeakslGnlgdAnveeWpksvekvkakypeakiVipGHgevgdkellehTlkllek	KLSTALAAALMLSGCMPGeirptigqqMETGDQRFGDLVFRQLAPNVWQHTSYLDMPGFGAVASNGLIVRDGGRVLLVDTAWTDDQTAQILNWIKQEINLPVALAVVTHAHQDKMGGMDALHAAGIATYANALSNQLAPQEGLVAAQHSLTFAANgwvepaTAPNFGPLKVFYPGPGHTSDNITVGIDGTDIAFGGCLIKDSKAKSLGNLGDADTEHYAASARAFGAAFPKASMIVMSHSAPDSRAAITHTARMADK	7	248	95.2569	15	0	0	270	Cluster_118	subclass_B1_metallo-beta-lactamase_NDM-18_NG_052866.1_cds_WP_077064890.1_1	Cluster_120	LIPO_Sec_SPII_	25-26	LIPO_Sec_SPII_	25-26	H_x_H_x_D	H_x_x_D_N	C	H	.
B1_177	GCF_002968415.1	492670	492670	Bacillus_velezensis	Bacteria-Terrabacteria_group-Bacillota-Bacilli-Bacillales-Bacillaceae-Bacillus-Bacillus_subtilis_group-Bacillus_amyloliquefaciens_group-	4385679	NZ_CP026610.1	class_B1	224.7	+	1196129	1196819	1196136	1196825	ATGAAACCGGCAGACGCTGCGGAGGGCTCCGCAGCAAAAGGTGTCACTCTCACACAGCTGGCGCCGCATGTCTGGATGCATACAAGCACCGGTACGGCAGACGGAAATCCCGTCCCTGCGAACGGATTGCTTCTTGAGACTTCCAAAGGAATCGTACTGATTGATACTCCGTGGAATGACAGTCTCACAGAGCAATTAATGACACAAATAAAAAAGCGGTTTCCCGGCAAAAGGATGACCGATGCCATTGTGACACACGCCCATGATGATCGTATCGGCGGTCTGAACACCCTGTACAAATACGGGGTAAAGGTGCACAGCACGAAACTGACCGCCGACTTCGCCCGACAGCAGGGATATGACCGGCCGCTCGGAGATTTGAAAAACGTGACAAAGCTG…	WP_061861364.1	subclass_B1_metallo-beta-lactamase	MKPADAAEGSAAKGVTLTQLAPHVWMHTSTGTADGNPVPANGLLLETSKGIVLIDTPWNDSLTEQLMTQIKKRFPGKRMTDAIVTHAHDDRIGGLNTLYKYGVKVHSTKLTADFARQQGYDRPLGDLKNVTKLKFGDMKIETFYPGKGHTEDNMTVWLPEDKLLFGGCLIKALETKEIVPTPGFYPDKWPRAVRKVMKRYQDISIVVPGHGSPGDDRLLPHTISLLKET	ORF_OK	TRUE_HIT	llslaaaeekeeeekdelkiekladnvyvhtsykevegvgkvssngLvvidekevvlvDtpwteeqtekLldwiekkl.klkvkavistHfHeDrlGGlealnkkgiktyasalTnellkkegkeqakhsfkkeekltlgkekievfypGegHtkDNiVvwlpkekiLfGGClvksaeakslGnlgdAnveeWpksvekvkakypeakiVipGHgevgdkellehTlkllek	TAGMKPADAAEGSAAKGVTLTQLAPHVWMHTSTGTADGN-PVPANGLLLETSKGIVLIDTPWNDSLTEQLMTQIKKRFpGKRMTDAIVTHAHDDRIGGLNTLYKYGVKVHSTKLTADFARQQGYDRPLGDLKNVTKLKFGDMKIETFYPGKGHTEDNMTVWLPEDKLLFGGCLIKALETKEIVPTPGFYPDKWPRAVRKVMKRYQDISIVVPGHGSPGDDRLLPHTISLLKE	18	248	90.9091	1	1	0	229	Cluster_1171	CLUSTER_NOT_IN_NCBI_AMR_REF_DB	Cluster_1151	OTHER	0	OTHER	0	H_x_H_x_D	H_x_x_D_N	C	H	.
B1_178	GCF_002968695.1	287	287	Pseudomonas_aeruginosa	Bacteria-Pseudomonadota-Gammaproteobacteria-Pseudomonadales-Pseudomonadaceae-Pseudomonas-Pseudomonas_aeruginosa_group-	7086054	NZ_CP027174.1	class_B1	256.5	-	5933196	5933955	5933179	5933979	ATGTTCAAACTTTTGAGTAAGTTATTGGTCTATTTGACCGCGTCTATCATGGCTATTGCGAGTCCGCTCGCTTTTTCCGTAGATTCTAGCGGTGAGTATCCGACAGTCAGCGAAATTCCGGTCGGGGAGGTCCGGCTTTACCAGATTGCCGATGGTGTTTGGTCGCATATCGCAACGCAGTCGTTTGATGGCGCAGTCTACCCGTCCAATGGTCTCATTGTCCGTGATGGTGATGAGTTGCTTTTGATTGATACAGCGTGGGGTGCGAAAAACACAGCGGCACTTCTCGCGGAGATTGAGAAGCAAATTGGACTTCCTGTAACGCGTGCAGTCTCCACGCACTTTCATGACGACCGCGTCGGCGGCGTTGATGTCCTTCGGGCGGCTGGGGTGGCAACG…	WP_003108247.1	subclass_B1_metallo-beta-lactamase_VIM-2	MFKLLSKLLVYLTASIMAIASPLAFSVDSSGEYPTVSEIPVGEVRLYQIADGVWSHIATQSFDGAVYPSNGLIVRDGDELLLIDTAWGAKNTAALLAEIEKQIGLPVTRAVSTHFHDDRVGGVDVLRAAGVATYASPSTRRLAEVEGNEIPTHSLEGLSSSGDAVRFGPVELFYPGAAHSTDNLVVYVPSASVLYGGCAIYELSRTSAGNVADADLAEWPTSIERIQQHYPEAQFVIPGHGLPGGLDLLKHTTNVVKAHTNRSVVE	ORF_OK	TRUE_HIT	llllllllslaaa.............eekeeeekdelkiekladnvyvhtsykevegvgkvssngLvvidekevvlvDtpwteeqtekLldwiekklklkvkavistHfHeDrlGGlealnkkgiktyasalTnellkkegkeqakhsfkkeek..ltlgkekievfypGegHtkDNiVvwlpkekiLfGGClvksaeakslGnlgdAnveeWpksvekvkakypeakiVipGHgevgdkellehTlkllekakk	LLVYLTASIMAIAsplafsvdssgeyPTVSEIPVGEVRLYQIADGVWSHIATQSFDGA-VYPSNGLIVRDGDELLLIDTAWGAKNTAALLAEIEKQIGLPVTRAVSTHFHDDRVGGVDVLRAAGVATYASPSTRRLAEVEGNEIPTHSLEGLSSsgDAVRFGPVELFYPGAAHSTDNLVVYVPSASVLYGGCAIYELSRTSAGNVADADLAEWPTSIERIQQHYPEAQFVIPGHGLPGGLDLLKHTTNVVKAHTN	12	251	94.4664	15	1	0	266	Cluster_131	subclass_B1_metallo-beta-lactamase_VIM-1_NG_050336.1_cds_WP_013263789.1_1	Cluster_134	SP_Sec_SPI_	26-27	SP_Sec_SPI_	26-27	H_x_H_x_D	H_x_x_D_N	C	H	.
B1_179	GCF_002968775.1	582	582	Morganella_morganii	Bacteria-Pseudomonadota-Gammaproteobacteria-Enterobacterales-Morganellaceae-Morganella-	4139887	NZ_CP027177.1	class_B1	263	+	3712554	3713322	3712519	3713331	ATGGAATTGCCCAATATTATGCACCCGGTCGCGAAGCTGAGCACCGCATTAGCCGCTGCATTGATGCTGAGCGGGTGCATGCCCGGTGAAATCCGCCCGACGATTGGCCAGCAAATGGAAACTGGCGACCAACGGTTTGGCGATCTGGTTTTCCGCCAGCTCGCACCGAATGTCTGGCAGCACACTTCCTATCTCGACATGCCGGGTTTCGGGGCAGTCGCTTCCAACGGTTTGATCGTCAGGGATGGCGGCCGCGTGCTGGTGGTCGATACCGCCTGGACCGATGACCAGACCGCCCAGATCCTCAACTGGATCAAGCAGGAGATCAACCTGCCGGTCGCGCTGGCGGTGGTGACTCACGCGCATCAGGACAAGATGGGCGGTATGGACGCGCTGCAT…	WP_004201164.1	subclass_B1_metallo-beta-lactamase_NDM-1	MELPNIMHPVAKLSTALAAALMLSGCMPGEIRPTIGQQMETGDQRFGDLVFRQLAPNVWQHTSYLDMPGFGAVASNGLIVRDGGRVLVVDTAWTDDQTAQILNWIKQEINLPVALAVVTHAHQDKMGGMDALHAAGIATYANALSNQLAPQEGMVAAQHSLTFAANGWVEPATAPNFGPLKVFYPGPGHTSDNITVGIDGTDIAFGGCLIKDSKAKSLGNLGDADTEHYAASARAFGAAFPKASMIVMSHSAPDSRAAITHTARMADKLR	ORF_OK	TRUE_HIT	kllllllllllllslaaa.........eekeeeekdelkiekladnvyvhtsykevegvgkvssngLvvidekevvlvDtpwteeqtekLldwiekklklkvkavistHfHeDrlGGlealnkkgiktyasalTnellkkegkeqakhsfkkeek......ltlgkekievfypGegHtkDNiVvwlpkekiLfGGClvksaeakslGnlgdAnveeWpksvekvkakypeakiVipGHgevgdkellehTlkllek	KLSTALAAALMLSGCMPGeirptigqqMETGDQRFGDLVFRQLAPNVWQHTSYLDMPGFGAVASNGLIVRDGGRVLVVDTAWTDDQTAQILNWIKQEINLPVALAVVTHAHQDKMGGMDALHAAGIATYANALSNQLAPQEGMVAAQHSLTFAANgwvepaTAPNFGPLKVFYPGPGHTSDNITVGIDGTDIAFGGCLIKDSKAKSLGNLGDADTEHYAASARAFGAAFPKASMIVMSHSAPDSRAAITHTARMADK	7	248	95.2569	15	0	0	270	Cluster_118	subclass_B1_metallo-beta-lactamase_NDM-18_NG_052866.1_cds_WP_077064890.1_1	Cluster_120	LIPO_Sec_SPII_	25-26	LIPO_Sec_SPII_	25-26	H_x_H_x_D	H_x_x_D_N	C	H	.
B1_18	GCF_002848565.1	573	573	Klebsiella_pneumoniae	Bacteria-Pseudomonadota-Gammaproteobacteria-Enterobacterales-Enterobacteriaceae-Klebsiella_Raoultella_group-Klebsiella-	5845963	NZ_CP025467.1	class_B1	264	-	181880	182645	181866	182666	ATGTTAAAAGTTATTAGTAGTTTATTGGTCTACATGACCGCGTCTGTCATGGCTGTCGCAAGTCCGTTAGCCCATTCCGGGGAGCCGAGTGGTGAGTATCCGACAGTCAACGAAATTCCGGTCGGAGAGGTCCGACTTTACCAGATTGCCGATGGTGTTTGGTCGCATATCGCAACGCAGTCGTTTGATGGCGCGGTCTACCCGTCCAATGGTCTCATTGTCCGTGATGGTGATGAGTTGCTTTTGATTGATACAGCGTGGGGTGCGAAAAACACAGCGGCACTTCTCGCGGAGATTGAAAAGCAAATTGGACTTCCCGTAACGCGTGCAGTCTCCACGCACTTTCATGACGACCGCGTCGGCGGCGTTGATGTCCTTCGGGCGGCTGGGGTGGCAACG…	WP_013263789.1	subclass_B1_metallo-beta-lactamase_VIM-1	MLKVISSLLVYMTASVMAVASPLAHSGEPSGEYPTVNEIPVGEVRLYQIADGVWSHIATQSFDGAVYPSNGLIVRDGDELLLIDTAWGAKNTAALLAEIEKQIGLPVTRAVSTHFHDDRVGGVDVLRAAGVATYASPSTRRLAEAEGNEIPTHSLEGLSSSGDAVRFGPVELFYPGAAHSTDNLVVYVPSANVLYGGCAVHELSSTSAGNVADADLAEWPTSVERIQKHYPEAEVVIPGHGLPGGLDLLQHTANVVKAHKNRSVAE	ORF_OK	TRUE_HIT	lllllllllslaaa.............eekeeeekdelkiekladnvyvhtsykevegvgkvssngLvvidekevvlvDtpwteeqtekLldwiekklklkvkavistHfHeDrlGGlealnkkgiktyasalTnellkkegkeqakhsfkkeek..ltlgkekievfypGegHtkDNiVvwlpkekiLfGGClvksaeakslGnlgdAnveeWpksvekvkakypeakiVipGHgevgdkellehTlkllekakkk	SLLVYMTASVMAVAsplahsgepsgeyPTVNEIPVGEVRLYQIADGVWSHIATQSFDGA-VYPSNGLIVRDGDELLLIDTAWGAKNTAALLAEIEKQIGLPVTRAVSTHFHDDRVGGVDVLRAAGVATYASPSTRRLAEAEGNEIPTHSLEGLSSsgDAVRFGPVELFYPGAAHSTDNLVVYVPSANVLYGGCAVHELSSTSAGNVADADLAEWPTSVERIQKHYPEAEVVIPGHGLPGGLDLLQHTANVVKAHKNR	11	252	95.2569	15	1	0	266	Cluster_131	subclass_B1_metallo-beta-lactamase_VIM-1_NG_050336.1_cds_WP_013263789.1_1	Cluster_134	SP_Sec_SPI_	26-27	SP_Sec_SPI_	26-27	H_x_H_x_D	H_x_x_D_N	C	H	.
B1_180	GCF_002969075.2	1428	1428	Bacillus_thuringiensis	Bacteria-Terrabacteria_group-Bacillota-Bacilli-Bacillales-Bacillaceae-Bacillus-Bacillus_cereus_group-	6113005	NZ_PUWY01000031.1	class_B1	278.1	+	90937	91645	90875	91648	ATGAAAAAGAATACGTTGTTAAAAGTAGGATTATGTGTAAGTTTACTAGGAACAACTCAATTTGTTAGCACGATTTCTTCTGTACAAGCATCACAAAAGGTAGAGCAAAAAGTAATAAAAAATGAGACGGGAACCATTTCAATATCTCAGTTAAACAAGAATGTATGGGTTCATACGGAGTTAGGTTATTTTAATGGAGAAGCAGTTCCTTCGAACGGTCTAGTTCTTAATACTTCTAAAGGTTTAGTACTTGTTGATTCTTCTTGGGATGATAAATTAACGAAGGAACTAATAGAAATGGTAGAAAAGAAATTTCAGAAGTGCGTAACGGATGTCATTATTACACATGCGCACGCTGATCGAATTGGCGGAATAACAGCGTTGAAAGAAAGAGGCATT…	WP_043936313.1	BcII_family_subclass_B1_metallo-beta-lactamase	MKKNTLLKVGLCVSLLGTTQFVSTISSVQASQKVEQKVIKNETGTISISQLNKNVWVHTELGYFNGEAVPSNGLVLNTSKGLVLVDSSWDDKLTKELIEMVEKKFQKCVTDVIITHAHADRIGGITALKERGIKAHSTALTAELAKKSGYEEPLGDLQTITSLKFGNTKVETFYPGKGHTEDNIVVWLPQYQILAGGCLVKSAEAKDLGNVADAYVNEWSTSIENVLKRYGNINSVVPGHGEVGDKGLLLHTLDLLK	ORF_OK	TRUE_HIT	llslaaa........eekeeeekdelkiekladnvyvhtsykevegvgkvssngLvvidekevvlvDtpwteeqtekLldwiekklklkvkavistHfHeDrlGGlealnkkgiktyasalTnellkkegkeqakhsfkkeekltlgkekievfypGegHtkDNiVvwlpkekiLfGGClvksaeakslGnlgdAnveeWpksvekvkakypeakiVipGHgevgdkellehTlklle	FVSTISSvqasqkveQKVIKNETGTISISQLNKNVWVHTELGYFNGE-AVPSNGLVLNTSKGLVLVDSSWDDKLTKELIEMVEKKFQKCVTDVIITHAHADRIGGITALKERGIKAHSTALTAELAKKSGYEEPLGDLQTITSLKFGNTKVETFYPGKGHTEDNIVVWLPQYQILAGGCLVKSAEAKDLGNVADAYVNEWSTSIENVLKRYGNINSVVPGHGEVGDKGLLLHTLDLLK	18	247	90.5138	8	1	0	257	Cluster_137	BcII_family_subclass_B1_metallo-beta-lactamase_NG_047224.1_cds_WP_012261328.1_1	Cluster_139	SP_Sec_SPI_	30-31	SP_Sec_SPI_	30-31	H_x_H_x_D	H_x_x_D_N	C	H	.
B1_181	GCF_002975115.1	1827288	1827288	Bacillus_sp_MYb78	Bacteria-Terrabacteria_group-Bacillota-Bacilli-Bacillales-Bacillaceae-Bacillus-unclassified_Bacillus_in_firmicutes-	6007142	NZ_PCOB01000009.1	class_B1	276.4	-	35570	36275	35568	36341	ATGAAAAAGAATACGTTGTTAAAAGTAGGATTATGTGTAAGTTTACTAGGAACAACTCAATTTGTTAGCACGATTTCTTCTGCACAAGCATCACAAAAGGTAGAGCAAATAGTAATCAAAAATGAGACGGGAACCATTTCAATATCTCAGTTAAACAAGAATGTATGGGTTCATACGGAGTTAGGTTATTTTAATGGAGAAGCAGTTCCTTCGAACGGTCTAGTTCTTAATACTTCTAAAGGGTTAGTACTTGTTGATTCTTCTTGGGATAACAAATTAACGAAGGAACTAATAGAAATGGTAGAAAAGAAATTTCAGAAGCGCGTAACAGATGTCATTATTACACATGCGCACGCTGATCGAATTGGCGGAATAACAGCGTTGAAAGAAAGAGGCATT…	WP_000742481.1	BcII_family_subclass_B1_metallo-beta-lactamase	MKKNTLLKVGLCVSLLGTTQFVSTISSAQASQKVEQIVIKNETGTISISQLNKNVWVHTELGYFNGEAVPSNGLVLNTSKGLVLVDSSWDNKLTKELIEMVEKKFQKRVTDVIITHAHADRIGGITALKERGIKAHSTALTAELAKNSGYEEPLGDLQTITSLKFGNTKVETFYPGKGHTEDNIVVWLPQYQILAGGCLVKSAEAKDLGNVADAYVNEWSTSIENVLKRYGNINSVVPGHGEVGDKGLLLHTLDLLK	ORF_OK	TRUE_HIT	lslaaa........eekeeeekdelkiekladnvyvhtsykevegvgkvssngLvvidekevvlvDtpwteeqtekLldwiekklklkvkavistHfHeDrlGGlealnkkgiktyasalTnellkkegkeqakhsfkkeekltlgkekievfypGegHtkDNiVvwlpkekiLfGGClvksaeakslGnlgdAnveeWpksvekvkakypeakiVipGHgevgdkellehTlklle	VSTISSaqasqkveQIVIKNETGTISISQLNKNVWVHTELGYFNGE-AVPSNGLVLNTSKGLVLVDSSWDNKLTKELIEMVEKKFQKRVTDVIITHAHADRIGGITALKERGIKAHSTALTAELAKNSGYEEPLGDLQTITSLKFGNTKVETFYPGKGHTEDNIVVWLPQYQILAGGCLVKSAEAKDLGNVADAYVNEWSTSIENVLKRYGNINSVVPGHGEVGDKGLLLHTLDLLK	19	247	90.1186	8	1	0	257	Cluster_137	BcII_family_subclass_B1_metallo-beta-lactamase_NG_047224.1_cds_WP_012261328.1_1	Cluster_139	SP_Sec_SPI_	30-31	SP_Sec_SPI_	30-31	H_x_H_x_D	H_x_x_D_N	C	H	.
B1_182	GCF_002975175.1	1848605	1848605	Bacillus_sp_MYb209	Bacteria-Terrabacteria_group-Bacillota-Bacilli-Bacillales-Bacillaceae-Bacillus-unclassified_Bacillus_in_firmicutes-	5745836	NZ_PCNZ01000004.1	class_B1	276.8	-	6750	7467	6748	7521	ATGAAAACGAATATATTATTAAAAGTAGGGTTATGTGTAAGTTTACTAGGAGTAACTCAATTTGTTAGTGCAATATCTTCCGTGCAAGCAGAACAAAAGCTAGGGCAAAAAGTAATAAAGAATGAGACAGGAACAATTTCAGTTTCTCAGTTAAACAAGCATGTATGGGTTCATACAGAATTAGGTTATTTTAACGGAGAAGCAGTTCCTTCGAACGGTCTAGTTCTTAATACTTCTAAAGGGTTAGTACTTGTCGATTCTTCTTGGGATGATAAGTTAACGAAGGAACTAATAGAGATGGTAGAAAAGAAATTTCAGAAGAGAGTAACGGATGTCATTATTACACATGCGCACGCTGATCGAATTGGTGGAATTAAAACGTTGAAAGAAAGAGGGATT…	WP_105585150.1	BcII_family_subclass_B1_metallo-beta-lactamase	MKTNILLKVGLCVSLLGVTQFVSAISSVQAEQKLGQKVIKNETGTISVSQLNKHVWVHTELGYFNGEAVPSNGLVLNTSKGLVLVDSSWDDKLTKELIEMVEKKFQKRVTDVIITHAHADRIGGIKTLKERGIKAHSTALTAELAKKNGYEEPLGDLQTITNMKFGNIKVETFYPGKGHTEDNIVVWLPQYNILAGGCLVKSADSKDLGNVADAYVNEWSTSIENVLNRYGNMKLVVPGHGDVGGKGLLLHTMDLLK	ORF_OK	TRUE_HIT	lllllslaaa........eekeeeekdelkiekladnvyvhtsykevegvgkvssngLvvidekevvlvDtpwteeqtekLldwiekklklkvkavistHfHeDrlGGlealnkkgiktyasalTnellkkegkeqakhsfkkeekltlgkekievfypGegHtkDNiVvwlpkekiLfGGClvksaeakslGnlgdAnveeWpksvekvkakypeakiVipGHgevgdkellehTlklle	VTQFVSAISSvqaeqklgQKVIKNETGTISVSQLNKHVWVHTELGYFNGE-AVPSNGLVLNTSKGLVLVDSSWDDKLTKELIEMVEKKFQKRVTDVIITHAHADRIGGIKTLKERGIKAHSTALTAELAKKNGYEEPLGDLQTITNMKFGNIKVETFYPGKGHTEDNIVVWLPQYNILAGGCLVKSADSKDLGNVADAYVNEWSTSIENVLNRYGNMKLVVPGHGDVGGKGLLLHTMDLLK	15	247	91.6996	8	1	0	257	Cluster_137	BcII_family_subclass_B1_metallo-beta-lactamase_NG_047224.1_cds_WP_012261328.1_1	Cluster_139	SP_Sec_SPI_	30-31	SP_Sec_SPI_	30-31	H_x_H_x_D	H_x_x_D_N	C	H	.
B1_183	GCF_002976395.1	1396	1396	Bacillus_cereus	Bacteria-Terrabacteria_group-Bacillota-Bacilli-Bacillales-Bacillaceae-Bacillus-Bacillus_cereus_group-	5450504	NZ_PCNX01000004.1	class_B1	278.6	+	288298	289012	288245	289015	ATGAAAAATACATTATTAAAATTAGGGGTATGTGTTAGTTTACTAGGAATAACTCCATTTGTTAGTACAATTTCTTCTGTACAAGCAGAACGAACGGTAGAGCATAAAGTAATAAAAAATGAGACAGGAACTATTTCAATTTCTCAGTTAAACAAAAATGTTTGGGTTCATACGGAGTTAGGTTATTTTAACGGAGAAGCAGTTCCTTCGAACGGTTTAATCCTTAATACTTCTAAAGGATTAGTACTTGTCGATTCTTCTTGGGATGATAAGTTAACGAAGGAATTAATAGACATGGCAGAAAAGAAATTTAAGAACCGCGTAACGGATGTTATTATTACACATGCACACGCTGATCGGATTGGCGGAATAAAAACGTTGAAAGAAAGAGGCATTAAA…	WP_000799227.1	BcII_family_subclass_B1_metallo-beta-lactamase	MKNTLLKLGVCVSLLGITPFVSTISSVQAERTVEHKVIKNETGTISISQLNKNVWVHTELGYFNGEAVPSNGLILNTSKGLVLVDSSWDDKLTKELIDMAEKKFKNRVTDVIITHAHADRIGGIKTLKERGIKTHSTTLTAELAKKNGYEEPLGDLQAITKLKFGNMKVETFYPGKGHTEDNIVVWLPQYNMLVGGCLVKSASAKDLGNITDAYVNEWSTSIENVLKRYENINFVVPGHGEVGDKGLLLHTLDLLK	ORF_OK	TRUE_HIT	llllslaaa........eekeeeekdelkiekladnvyvhtsykevegvgkvssngLvvidekevvlvDtpwteeqtekLldwiekklklkvkavistHfHeDrlGGlealnkkgiktyasalTnellkkegkeqakhsfkkeekltlgkekievfypGegHtkDNiVvwlpkekiLfGGClvksaeakslGnlgdAnveeWpksvekvkakypeakiVipGHgevgdkellehTlklle	TPFVSTISSvqaertveHKVIKNETGTISISQLNKNVWVHTELGYFNGE-AVPSNGLILNTSKGLVLVDSSWDDKLTKELIDMAEKKFKNRVTDVIITHAHADRIGGIKTLKERGIKTHSTTLTAELAKKNGYEEPLGDLQAITKLKFGNMKVETFYPGKGHTEDNIVVWLPQYNMLVGGCLVKSASAKDLGNITDAYVNEWSTSIENVLKRYENINFVVPGHGEVGDKGLLLHTLDLLK	16	247	91.3043	8	1	0	256	Cluster_137	BcII_family_subclass_B1_metallo-beta-lactamase_NG_047224.1_cds_WP_012261328.1_1	Cluster_139	SP_Sec_SPI_	29-30	SP_Sec_SPI_	29-30	H_x_H_x_D	H_x_x_D_N	C	H	.
B1_184	GCF_002976415.1	1396	1396	Bacillus_cereus	Bacteria-Terrabacteria_group-Bacillota-Bacilli-Bacillales-Bacillaceae-Bacillus-Bacillus_cereus_group-	5461739	NZ_PCNY01000004.1	class_B1	278.6	-	332871	333585	332869	333639	ATGAAAAATACATTATTAAAATTAGGGGTATGTGTTAGTTTACTAGGAATAACTCCATTTGTTAGTACAATTTCTTCTGTACAAGCAGAACGAACGGTAGAGCATAAAGTAATAAAAAATGAGACAGGAACTATTTCAATTTCTCAGTTAAACAAAAATGTTTGGGTTCATACGGAGTTAGGTTATTTTAACGGAGAAGCAGTTCCTTCGAACGGTTTAATCCTTAATACTTCTAAAGGATTAGTACTTGTCGATTCTTCTTGGGATGATAAGTTAACGAAGGAATTAATAGACATGGCAGAAAAGAAATTTAAGAACCGCGTAACGGATGTTATTATTACACATGCACACGCTGATCGGATTGGCGGAATAAAAACGTTGAAAGAAAGAGGCATTAAA…	WP_000799227.1	BcII_family_subclass_B1_metallo-beta-lactamase	MKNTLLKLGVCVSLLGITPFVSTISSVQAERTVEHKVIKNETGTISISQLNKNVWVHTELGYFNGEAVPSNGLILNTSKGLVLVDSSWDDKLTKELIDMAEKKFKNRVTDVIITHAHADRIGGIKTLKERGIKTHSTTLTAELAKKNGYEEPLGDLQAITKLKFGNMKVETFYPGKGHTEDNIVVWLPQYNMLVGGCLVKSASAKDLGNITDAYVNEWSTSIENVLKRYENINFVVPGHGEVGDKGLLLHTLDLLK	ORF_OK	TRUE_HIT	llllslaaa........eekeeeekdelkiekladnvyvhtsykevegvgkvssngLvvidekevvlvDtpwteeqtekLldwiekklklkvkavistHfHeDrlGGlealnkkgiktyasalTnellkkegkeqakhsfkkeekltlgkekievfypGegHtkDNiVvwlpkekiLfGGClvksaeakslGnlgdAnveeWpksvekvkakypeakiVipGHgevgdkellehTlklle	TPFVSTISSvqaertveHKVIKNETGTISISQLNKNVWVHTELGYFNGE-AVPSNGLILNTSKGLVLVDSSWDDKLTKELIDMAEKKFKNRVTDVIITHAHADRIGGIKTLKERGIKTHSTTLTAELAKKNGYEEPLGDLQAITKLKFGNMKVETFYPGKGHTEDNIVVWLPQYNMLVGGCLVKSASAKDLGNITDAYVNEWSTSIENVLKRYENINFVVPGHGEVGDKGLLLHTLDLLK	16	247	91.3043	8	1	0	256	Cluster_137	BcII_family_subclass_B1_metallo-beta-lactamase_NG_047224.1_cds_WP_012261328.1_1	Cluster_139	SP_Sec_SPI_	29-30	SP_Sec_SPI_	29-30	H_x_H_x_D	H_x_x_D_N	C	H	.
B1_185	GCF_002976445.1	1827287	1827287	Bacillus_sp_MYb56	Bacteria-Terrabacteria_group-Bacillota-Bacilli-Bacillales-Bacillaceae-Bacillus-unclassified_Bacillus_in_firmicutes-	5929383	NZ_PCOH01000049.1	class_B1	278.9	-	10882	11593	10880	11653	ATGAAAAAGAATATATTATTAAAAGTAGGGGTATGTGTTAGTTTACTAGGAACAATTCAATTTGTTAGCACAATTTCTTCTGTGAAAGCGGAACAAAAGCTAGAGCAAAAAGTAATAAAGAATGAGACAGGAACTATTTCAATTTCTCAGTTAAACAAAAATGTATGGGTTCATACTGAGTTAGGTTATTTTAATGGAGTAGCAGTTCCATCGAACGGTCTAGTTCTTAACACTTCTAAAGGGTTAGTGCTTGTCGATTCTTCTTGGGATGATAAGTTAACGAAGGAACTAATAGAGATGGTAGAAAAGAAATTTCAGAAGCGCGTAACGGATGTCATTATTACACATGCGCATGCTGATCGAATTGGCGGGATAAAAATGTTGAAAGAAAGAGGCATT…	WP_002190263.1	BcII_family_subclass_B1_metallo-beta-lactamase	MKKNILLKVGVCVSLLGTIQFVSTISSVKAEQKLEQKVIKNETGTISISQLNKNVWVHTELGYFNGVAVPSNGLVLNTSKGLVLVDSSWDDKLTKELIEMVEKKFQKRVTDVIITHAHADRIGGIKMLKERGIKAHSTALTAELAKKNGYEEPLGDLQTITNLKFGNIKVETFYPGKGHTEDNIVVGLPQYNILAGGCLVKSAEAKDLGNVADAYVNEWSISIENVLNRYGNMNLVVPGHGEVGDRGLLLHTLDLLK	ORF_OK	TRUE_HIT	lllslaaa...........eekeeeekdelkiekladnvyvhtsykevegvgkvssngLvvidekevvlvDtpwteeqtekLldwiekklklkvkavistHfHeDrlGGlealnkkgiktyasalTnellkkegkeqakhsfkkeekltlgkekievfypGegHtkDNiVvwlpkekiLfGGClvksaeakslGnlgdAnveeWpksvekvkakypeakiVipGHgevgdkellehTlklle	QFVS---TissvkaeqkleQKVIKNETGTISISQLNKNVWVHTELGYFNGV-AVPSNGLVLNTSKGLVLVDSSWDDKLTKELIEMVEKKFQKRVTDVIITHAHADRIGGIKMLKERGIKAHSTALTAELAKKNGYEEPLGDLQTITNLKFGNIKVETFYPGKGHTEDNIVVGLPQYNILAGGCLVKSAEAKDLGNVADAYVNEWSISIENVLNRYGNMNLVVPGHGEVGDRGLLLHTLDLLK	17	247	90.9091	11	4	0	257	Cluster_137	BcII_family_subclass_B1_metallo-beta-lactamase_NG_047224.1_cds_WP_012261328.1_1	Cluster_139	SP_Sec_SPI_	30-31	SP_Sec_SPI_	30-31	H_x_H_x_D	H_x_x_D_N	C	H	.
B1_186	GCF_002979455.1	1827290	1827290	Chryseobacterium_sp_MYb7	Bacteria-FCB_group-Bacteroidota_Chlorobiota_group-Bacteroidota-Flavobacteriia-Flavobacteriales-Weeksellaceae-Chryseobacterium_group-Chryseobacterium-unclassified_Chryseobacterium-	5153515	NZ_PCOU01000021.1	class_B1	270.2	+	67943	68675	67926	68684	ATGAAAATCATTCTTAAAAATACATTGGTCTTTTTATTTTCTATTTTGATATTGAGCTGTAGCTCGCAGAATAAGGATCATTTTAAAGCAAAGGAAATTTATAAATCAAAAGACCTGATTATTATCCAGATTTCGGAGAATTCTTTTATTCATACTTCGTTTAAGCAAACCAATGACTTTGGAAATGTACCTTGCAACGGATTGATCGTAAAAGACAATAATGAAACGATTGTTTTTGATACCCCTACGAATGATAAAATTTCAGAAGAATTGATACAATGGATCAATAAAAAACTTCATGCAAAAATTAATGCAGTTATTTCTACCCATTTTCACGATGATAGTTTGGGCGGATTGATGGCTTTTCATCAACATAATATTCCGTCTTATTCATATGTG…	WP_105703305.1	CHM_family_subclass_B1_metallo-beta-lactamase	MKIILKNTLVFLFSILILSCSSQNKDHFKAKEIYKSKDLIIIQISENSFIHTSFKQTNDFGNVPCNGLIVKDNNETIVFDTPTNDKISEELIQWINKKLHAKINAVISTHFHDDSLGGLMAFHQHNIPSYSYVKTIELAKENNFVVPENSFNDFVVLKVGDKDVIAKFFGEGHTKDNAVGYFPSEKILFGGCLLKELEAGKGYLGDANVAAWSNTVEKVKKEYPNVKIVVPGHGDYGDGKLLDYTITLFKGQ	ORF_OK	TRUE_HIT	rkllllllllllllslaaa.....eekeeeekdelkiekladnvyvhtsykevegvgkvssngLvvidekevvlvDtpwteeqtekLldwiekklklkvkavistHfHeDrlGGlealnkkgiktyasalTnellkkegkeqakhsfkkeekltlgkekievfypGegHtkDNiVvwlpkekiLfGGClvksaeakslGnlgdAnveeWpksvekvkakypeakiVipGHgevgdkellehTlklle	KNT-LVFLFSILILSCSSQnkdhfKAKEIYKSKDLIIIQISENSFIHTSFKQTNDFGNVPCNGLIVKDNNETIVFDTPTNDKISEELIQWINKKLHAKINAVISTHFHDDSLGGLMAFHQHNIPSYSYVKTIELAKENNFVVPENSFNDFVVLKVGDKDVIAKFFGEGHTKDNAVGYFPSEKILFGGCLLKELEA-GKGYLGDANVAAWSNTVEKVKKEYPNVKIVVPGHGDYGDGKLLDYTITLFK	6	247	95.2569	5	2	0	252	Cluster_375	CLUSTER_NOT_IN_NCBI_AMR_REF_DB	Cluster_384	LIPO_Sec_SPII_	19-20	LIPO_Sec_SPII_	19-20	H_x_H_x_D	H_x_x_D_N	C	H	.
B1_187	GCF_002979455.1	1827290	1827290	Chryseobacterium_sp_MYb7	Bacteria-FCB_group-Bacteroidota_Chlorobiota_group-Bacteroidota-Flavobacteriia-Flavobacteriales-Weeksellaceae-Chryseobacterium_group-Chryseobacterium-unclassified_Chryseobacterium-	5153515	NZ_PCOU01000005.1	class_B1	281.3	-	201767	202493	201762	202493	ATGAAGAAAAGCATTCCGTTTTTTATTATTTCGATGTTATTAAGTCCATTTGCAAATGCGCAGACCACTTCTCAGGTAAGAGATTTTGTAATTGAACCACAGATTAAGCCTAATTTCTATATTTATAAAACTTTCGGAGTATTCGGTGGCAAAGAATATTCTACTAATGCAGTTTATCTGGTTACCAAAAAAGGAGTTGTTTTATTCGATGTTCCATGGCAGAAAACACAGTATCAAAGTTTATTGGATACCATTCAAAAACGCCATCATCTTCCGGTTGTAGCTGTATTTGCTACTCATTCACACGAAGACAGAGCCGGAGATTTAAGTTTTTATAATAACAAAGGAATCAAAACATATGCAACTGCCAAAACTAATGACCTGTTAAGGAAAGAAGGA…	WP_105701483.1	IND_family_subclass_B1_metallo-beta-lactamase	MKKSIPFFIISMLLSPFANAQTTSQVRDFVIEPQIKPNFYIYKTFGVFGGKEYSTNAVYLVTKKGVVLFDVPWQKTQYQSLLDTIQKRHHLPVVAVFATHSHEDRAGDLSFYNNKGIKTYATAKTNDLLRKEGKATSTEIIETGKTYRIGGEKFVVDFLGEGHTVDNVVVWFPKYNILDGGCLVKSRTAENLGYTGEANVAQWPQTMTKLKSKYSKATLVIPGHDEWKGGGHVEHTLELLNKK	ORF_OK	TRUE_HIT	klrkllllllllllllslaaaeekeeeekdelkiekladnvyvhtsykevegvgkvssngLvvidekevvlvDtpwteeqtekLldwiekklklkvkavistHfHeDrlGGlealnkkgiktyasalTnellkkegkeqakhsfkkeekltlgkekievfypGegHtkDNiVvwlpkekiLfGGClvksaeakslGnlgdAnveeWpksvekvkakypeakiVipGHgevgdkellehTlkllek	IMKKSIPFF-IISMLLSPFANAQTTSQVRDFVIEPQIKPNFYIYKTFGVFGGK-EYSTNAVYLVTKKGVVLFDVPWQKTQYQSLLDTIQKRHHLPVVAVFATHSHEDRAGDLSFYNNKGIKTYATAKTNDLLRKEGKATSTEIIETGKTYRIGGEKFVVDFLGEGHTVDNVVVWFPKYNILDGGCLVKSRTAENLGYTGEANVAQWPQTMTKLKSKYSKATLVIPGHDEWKGGGHVEHTLELLNK	4	248	96.4427	0	2	0	243	Cluster_751	IND_family_subclass_B1_metallo-beta-lactamase_CGB-1_NG_051689.1_cds_WP_002979282.1_1	Cluster_755	SP_Sec_SPI_	20-21	SP_Sec_SPI_	20-21	H_x_H_x_D	H_x_x_D_N	C	H	.
B1_188	GCF_002979665.1	680127	680127	Chryseobacterium_culicis	Bacteria-FCB_group-Bacteroidota_Chlorobiota_group-Bacteroidota-Flavobacteriia-Flavobacteriales-Weeksellaceae-Chryseobacterium_group-Chryseobacterium-	5011359	NZ_PCPH01000002.1	class_B1	279.8	-	482404	483124	482399	483127	ATGAAAAAAAGCCTTTCTTTTTTTATTATTTCGATGCTATTAAGTCCATTGGCCAATGCTCAAACCACTCAGGTAAGAGATTTTGTGATTGAGCCACAGATTAAGCCTAATTTTTATATTTATAAAACTTTCGGAGTATTCGGAGGAAAAGAATATTCGACGAATGCCGTTTATCTGGTGACCAAAAAAGGAGTTGTTTTGTTCGATGTTCCATGGCAGAAAACACAATATCAAAGCCTGCTGGATACCATCCAGAAACGCCATAACCTGCCTGTTATTGCAGTGTTTGCTACCCATTCACATGAAGACAGAGCCGGAGATTTGAGCTTTTATAATAACAAAGGAATCAAAACATATGCAACTGCCAAAACCAACGAATTATTGAAGAAAGAAGGAAAA…	WP_105682224.1	IND_family_subclass_B1_metallo-beta-lactamase	MKKSLSFFIISMLLSPLANAQTTQVRDFVIEPQIKPNFYIYKTFGVFGGKEYSTNAVYLVTKKGVVLFDVPWQKTQYQSLLDTIQKRHNLPVIAVFATHSHEDRAGDLSFYNNKGIKTYATAKTNELLKKEGKATSTELIETGKTYRFGGEKFVVDFLGEGHTVDNVVVWFPQYKILDGGCLVKSKAAVDLGYTGEANVAQWPKTMEKLKSKYAQATLIIPGHDEWKGGGHVEHTLDLLNKK	ORF_OK	TRUE_HIT	lrkllllllllllllslaaaeekeeeekdelkiekladnvyvhtsykevegvgkvssngLvvidekevvlvDtpwteeqtekLldwiekklklkvkavistHfHeDrlGGlealnkkgiktyasalTnellkkegkeqakhsfkkeekltlgkekievfypGegHtkDNiVvwlpkekiLfGGClvksaeakslGnlgdAnveeWpksvekvkakypeakiVipGHgevgdkellehTlkllek	MKKSLSFFII-SMLLSPLA-NAQTTQVRDFVIEPQIKPNFYIYKTFGVFGGK-EYSTNAVYLVTKKGVVLFDVPWQKTQYQSLLDTIQKRHNLPVIAVFATHSHEDRAGDLSFYNNKGIKTYATAKTNELLKKEGKATSTELIETGKTYRFGGEKFVVDFLGEGHTVDNVVVWFPQYKILDGGCLVKSKAAVDLGYTGEANVAQWPKTMEKLKSKYAQATLIIPGHDEWKGGGHVEHTLDLLNK	5	248	96.0474	0	3	0	242	Cluster_751	IND_family_subclass_B1_metallo-beta-lactamase_CGB-1_NG_051689.1_cds_WP_002979282.1_1	Cluster_755	SP_Sec_SPI_	20-21	SP_Sec_SPI_	20-21	H_x_H_x_D	H_x_x_D_N	C	H	.
B1_189	GCF_002979665.1	680127	680127	Chryseobacterium_culicis	Bacteria-FCB_group-Bacteroidota_Chlorobiota_group-Bacteroidota-Flavobacteriia-Flavobacteriales-Weeksellaceae-Chryseobacterium_group-Chryseobacterium-	5011359	NZ_PCPH01000001.1	class_B1	269.3	-	491460	492204	491452	492210	ATGAAAAATACTATTAAAAATCTCTTCTTCGTATTCTTCTCTTTTTTCATTCTGAGTTGTGGCTCACAGAATAAGGAAAGTTTTAAAGCAAAGAAAATGTATGAGTCCAGCAATCTGATCATCACCCAGATTTCAGAAAATTCTTTTATCCATACTTCCTTTAAGCAAACGAATGACTTTGGGAATGTACCTTGTAATGGACTGATTGTGACAGATCATCAAGAAGCTATTGTTTTTGATACTCCTACTGATGATAAAAGTTCAGAAGAATTGATACAATGGATTAAAGGGAAGTTGCATGCAAAAATCAAAGCTGTCATTCCCACTCATTTTCATGATGACAGCTTAGGAGGATTGATGGCGTTTCACAAAAATGGCATTCCCTCTTATTCCTATGTG…	WP_105680986.1	CHM_family_subclass_B1_metallo-beta-lactamase	MKNTIKNLFFVFFSFFILSCGSQNKESFKAKKMYESSNLIITQISENSFIHTSFKQTNDFGNVPCNGLIVTDHQEAIVFDTPTDDKSSEELIQWIKGKLHAKIKAVIPTHFHDDSLGGLMAFHKNGIPSYSYVKTIELARENNFVIPENGFNDSVVLKVGDKEVMAKFFGEGHTKDNVVGYFPSENILFGGCLLKELEAGKGYLGDANVSAWSDTVEKVKKEYSHVKIVVPGHGEYGDGKLLDYTITLFKGQ	ORF_OK	TRUE_HIT	kkklrkllllllllllllslaaa.....eekeeeekdelkiekladnvyvhtsykevegvgkvssngLvvidekevvlvDtpwteeqtekLldwiekklklkvkavistHfHeDrlGGlealnkkgiktyasalTnellkkegkeqakhsfkkeekltlgkekievfypGegHtkDNiVvwlpkekiLfGGClvksaeakslGnlgdAnveeWpksvekvkakypeakiVipGHgevgdkellehTlklle	KNTIKNL-FFVFFSFFILSCGSQnkesfKAKKMYESSNLIITQISENSFIHTSFKQTNDFGNVPCNGLIVTDHQEAIVFDTPTDDKSSEELIQWIKGKLHAKIKAVIPTHFHDDSLGGLMAFHKNGIPSYSYVKTIELARENNFVIPENGFNDSVVLKVGDKEVMAKFFGEGHTKDNVVGYFPSENILFGGCLLKELEA-GKGYLGDANVSAWSDTVEKVKKEYSHVKIVVPGHGEYGDGKLLDYTITLFK	2	247	96.8379	5	2	0	252	Cluster_375	CLUSTER_NOT_IN_NCBI_AMR_REF_DB	Cluster_384	LIPO_Sec_SPII_	19-20	LIPO_Sec_SPII_	19-20	H_x_H_x_D	H_x_x_D_N	C	H	.
B1_19	GCF_002848835.1	573	573	Klebsiella_pneumoniae	Bacteria-Pseudomonadota-Gammaproteobacteria-Enterobacterales-Enterobacteriaceae-Klebsiella_Raoultella_group-Klebsiella-	5322023	NZ_PKNC01000098.1	class_B1	269.3	+	15373	16141	15338	16150	ATGGAATTGCCCAATATTATGCACCCGGTCGCGAAGCTGAGCACCGCATTAGCCGCTGCATTGATGCTGAGCGGGTGCATGCCCGGTGAAATCCGCCCGACGATTGGCCAGCAAATGGAAACTGGCGACCAACGGTTTGGCGATCTGGTTTTCCGCCAGCTCGCACCGAATGTCTGGCAGCACACTTCCTATCTCGACATGCCGGGTTTCGGGGCAGTCGCTTCCAACGGTTTGATCGTCAGGGATGGCGGCCGCGTGCTGGTGGTCGATACCGCCTGGACCGATGACCAGACCGCCCAGATCCTCAACTGGATCAAGCAGGAGATCAACCTGCCGGTCGCGCTGGCGGTGGTGACTCACGCGCATCAGGACAAGATGGGCGGTATGAACGCGCTGCAT…	WP_032495622.1	subclass_B1_metallo-beta-lactamase_NDM-7	MELPNIMHPVAKLSTALAAALMLSGCMPGEIRPTIGQQMETGDQRFGDLVFRQLAPNVWQHTSYLDMPGFGAVASNGLIVRDGGRVLVVDTAWTDDQTAQILNWIKQEINLPVALAVVTHAHQDKMGGMNALHAAGIATYANALSNQLAPQEGLVAAQHSLTFAANGWVEPATAPNFGPLKVFYPGPGHTSDNITVGIDGTDIAFGGCLIKDSKAKSLGNLGDADTEHYAASARAFGAAFPKASMIVMSHSAPDSRAAITHTARMADKLR	ORF_OK	TRUE_HIT	kllllllllllllslaaa.........eekeeeekdelkiekladnvyvhtsykevegvgkvssngLvvidekevvlvDtpwteeqtekLldwiekklklkvkavistHfHeDrlGGlealnkkgiktyasalTnellkkegkeqakhsfkkeek......ltlgkekievfypGegHtkDNiVvwlpkekiLfGGClvksaeakslGnlgdAnveeWpksvekvkakypeakiVipGHgevgdkellehTlkllek	KLSTALAAALMLSGCMPGeirptigqqMETGDQRFGDLVFRQLAPNVWQHTSYLDMPGFGAVASNGLIVRDGGRVLVVDTAWTDDQTAQILNWIKQEINLPVALAVVTHAHQDKMGGMNALHAAGIATYANALSNQLAPQEGLVAAQHSLTFAANgwvepaTAPNFGPLKVFYPGPGHTSDNITVGIDGTDIAFGGCLIKDSKAKSLGNLGDADTEHYAASARAFGAAFPKASMIVMSHSAPDSRAAITHTARMADK	7	248	95.2569	15	0	0	270	Cluster_118	subclass_B1_metallo-beta-lactamase_NDM-18_NG_052866.1_cds_WP_077064890.1_1	Cluster_120	LIPO_Sec_SPII_	25-26	LIPO_Sec_SPII_	25-26	H_x_H_x_D	H_x_x_D_N	C	H	.
B1_190	GCF_002979755.1	680127	680127	Chryseobacterium_culicis	Bacteria-FCB_group-Bacteroidota_Chlorobiota_group-Bacteroidota-Flavobacteriia-Flavobacteriales-Weeksellaceae-Chryseobacterium_group-Chryseobacterium-	5011784	NZ_PCPP01000001.1	class_B1	278.4	+	878587	879307	878585	879313	ATGAAAAAAAGCCTTTCTTTTTTTATTATTTCGATGCTATTAAGTCCATTGGCCAATGCTCAAACCACTCAGGTAAGAGATTTTGTGATTGAGCCACAGATTAAGCCTAATTTTTATATTTATAAAACTTTCGGAGTATTCGGAGGAAAAGAATATTCGACGAATGCCGTTTATCTGGTGACCAAAAAAGGAGTTGTTTTGTTCGATGTTCCATGGCAGAAAACACAATATCAAAGCCTGCTGGATACCATCCAGAAACGCCATAACCTGCCTGTTATTGCAGTGTTTGCTACCCATTCACATGAAGACAGAGCCGGAGATTTGAGCTTTTATAATAACAAAGGAATCAAAACATATGCAACTGCCAAAACCAACGAATTATTGAAGAAAGAAGGAAAA…	WP_105682224.1	IND_family_subclass_B1_metallo-beta-lactamase	MKKSLSFFIISMLLSPLANAQTTQVRDFVIEPQIKPNFYIYKTFGVFGGKEYSTNAVYLVTKKGVVLFDVPWQKTQYQSLLDTIQKRHNLPVIAVFATHSHEDRAGDLSFYNNKGIKTYATAKTNELLKKEGKATSTELIETGKTYRFGGEKFVVDFLGEGHTVDNVVVWFPQYKILDGGCLVKSKAAVDLGYTGEANVAQWPKTMEKLKSKYAQATLIIPGHDEWKGGGHVEHTLDLLNKK	ORF_OK	TRUE_HIT	lrkllllllllllllslaaaeekeeeekdelkiekladnvyvhtsykevegvgkvssngLvvidekevvlvDtpwteeqtekLldwiekklklkvkavistHfHeDrlGGlealnkkgiktyasalTnellkkegkeqakhsfkkeekltlgkekievfypGegHtkDNiVvwlpkekiLfGGClvksaeakslGnlgdAnveeWpksvekvkakypeakiVipGHgevgdkellehTlkllek	MKKSLSFFII-SMLLSPLA-NAQTTQVRDFVIEPQIKPNFYIYKTFGVFGGK-EYSTNAVYLVTKKGVVLFDVPWQKTQYQSLLDTIQKRHNLPVIAVFATHSHEDRAGDLSFYNNKGIKTYATAKTNELLKKEGKATSTELIETGKTYRFGGEKFVVDFLGEGHTVDNVVVWFPQYKILDGGCLVKSKAAVDLGYTGEANVAQWPKTMEKLKSKYAQATLIIPGHDEWKGGGHVEHTLDLLNK	5	248	96.0474	0	3	0	242	Cluster_751	IND_family_subclass_B1_metallo-beta-lactamase_CGB-1_NG_051689.1_cds_WP_002979282.1_1	Cluster_755	SP_Sec_SPI_	20-21	SP_Sec_SPI_	20-21	H_x_H_x_D	H_x_x_D_N	C	H	.
B1_191	GCF_002979755.1	680127	680127	Chryseobacterium_culicis	Bacteria-FCB_group-Bacteroidota_Chlorobiota_group-Bacteroidota-Flavobacteriia-Flavobacteriales-Weeksellaceae-Chryseobacterium_group-Chryseobacterium-	5011784	NZ_PCPP01000001.1	class_B1	268.3	-	1853293	1854037	1853285	1854043	ATGAAAAATACTATTAAAAATCTCTTCTTCGTATTCTTCTCTTTTTTCATTCTGAGTTGTGGCTCACAGAATAAGGAAAGTTTTAAAGCAAAGAAAATGTATGAGTCCAGCAATCTGATCATCACCCAGATTTCAGAAAATTCTTTTATCCATACTTCCTTTAAGCAAACGAATGACTTTGGGAATGTACCTTGTAATGGACTGATTGTGACAGATCATCAAGAAGCTATTGTTTTTGATACTCCTACTGATGATAAAAGTTCAGAAGAATTGATACAATGGATTAAAGGGAAGTTGCATGCAAAAATCAAAGCTGTCATTCCCACTCATTTTCATGATGACAGCTTAGGAGGATTGATGGCGTTTCACAAAAATGGCATTCCCTCTTATTCCTATGTG…	WP_105680986.1	CHM_family_subclass_B1_metallo-beta-lactamase	MKNTIKNLFFVFFSFFILSCGSQNKESFKAKKMYESSNLIITQISENSFIHTSFKQTNDFGNVPCNGLIVTDHQEAIVFDTPTDDKSSEELIQWIKGKLHAKIKAVIPTHFHDDSLGGLMAFHKNGIPSYSYVKTIELARENNFVIPENGFNDSVVLKVGDKEVMAKFFGEGHTKDNVVGYFPSENILFGGCLLKELEAGKGYLGDANVSAWSDTVEKVKKEYSHVKIVVPGHGEYGDGKLLDYTITLFKGQ	ORF_OK	TRUE_HIT	kkklrkllllllllllllslaaa.....eekeeeekdelkiekladnvyvhtsykevegvgkvssngLvvidekevvlvDtpwteeqtekLldwiekklklkvkavistHfHeDrlGGlealnkkgiktyasalTnellkkegkeqakhsfkkeekltlgkekievfypGegHtkDNiVvwlpkekiLfGGClvksaeakslGnlgdAnveeWpksvekvkakypeakiVipGHgevgdkellehTlklle	KNTIKNL-FFVFFSFFILSCGSQnkesfKAKKMYESSNLIITQISENSFIHTSFKQTNDFGNVPCNGLIVTDHQEAIVFDTPTDDKSSEELIQWIKGKLHAKIKAVIPTHFHDDSLGGLMAFHKNGIPSYSYVKTIELARENNFVIPENGFNDSVVLKVGDKEVMAKFFGEGHTKDNVVGYFPSENILFGGCLLKELEA-GKGYLGDANVSAWSDTVEKVKKEYSHVKIVVPGHGEYGDGKLLDYTITLFK	2	247	96.8379	5	2	0	252	Cluster_375	CLUSTER_NOT_IN_NCBI_AMR_REF_DB	Cluster_384	LIPO_Sec_SPII_	19-20	LIPO_Sec_SPII_	19-20	H_x_H_x_D	H_x_x_D_N	C	H	.
B1_192	GCF_002980525.1	2100533	2100533	Sphingobacterium_haloxyli	Bacteria-FCB_group-Bacteroidota_Chlorobiota_group-Bacteroidota-Sphingobacteriia-Sphingobacteriales-Sphingobacteriaceae-Sphingobacterium-	4694399	NZ_PVBQ01000001.1	class_B1	259.5	+	100108	100777	98312	100786	ATGTTTCAACAAAGGAAGCTTAAAAGCTATTTCGCTATCATTATATTGTATTTTTTAAGTATTTCCGCTACACAGGCGCAGTCTTCCCGCACTGAATGGTTCGAAGACGCACGTTACGGCATGTTCATCCATTGGGGACTGTATAGCGCTGCCGAGGGAATGTGGAAAGGAGAACCGCTGCGGTATGCCAACAATTACGCAGAATGGATCCGATACCGTAACCGTATCTCCAAAGAAGAATACGGCGAGCTGGCCAAACGCTTTGTTTGGGATAAGATTGACCCTGAAGACTGGGTCTTGCTGGCTAAGGAATCGGGCATGAAATATATCATCATTACCGCAAAACATCACGACGGTGTCGCCTTATGGAACACGAAAGTAGGGAATTATTCCCTATCC…	WP_243403196.1	BlaB_IND_MUS_family_subclass_B1_metallo-beta-lactamase	MFQQRKLKSYFAIIILYFLSISATQAQSSRTEWFEDARYGMFIHWGLYSAAEGMWKGEPLRYANNYAEWIRYRNRISKEEYGELAKRFVWDKIDPEDWVLLAKESGMKYIIITAKHHDGVALWNTKVGNYSLSKLSGANRDVIKEIADACRKHDMKLGFYYSHWIDWEHPYAWDHNQELTGHVTDEQFNQYWQEKAIPQMRELLTNYGDIAIMWFDMWIPYEKTIFKREQLEQAVALIRELQPNCLINSRLGLPTDANYVDFETLGDNQFGTSYIDHPWETPGTIAHSWGYNGQEKNWKSTGQLFESLISNVALNGGFTLNIGPRADGSVPYESISRLRDVGKWLNKYGEALYNNTGLDLQVNQHDWGKITKSRKSNTVYLHVFNWPLDGKLRLSGINS…	ORF_OK	TRUE_HIT	eekeeeekdelkiekladnvyvhtsykevegvgkvssngLvvidekevvlvDtpwteeqtekLldwiekklklkvkavistHfHeDrlGGlealnkkgiktyasalTnellkkegkeqakhsfkkeekltlgkekievfypGegHtkDNiVvwlpkekiLfGGClvksaeakslGnlgdAnveeWpksvekvkakypeakiVipGHgevgd.kellehTlkllek	QTNAVAQAKPLVIEKINDKLYLYTTYQEYEGT-KVSANALYLLTQKGAILFDTPWDATQYQPLLDSIQEKHGMPVIGVYATHWHEDRAGGFGYYNKVGIPTYATTRTNALLRANGKPLATRKIEEGKTYSIGGESFVFDFFGPGHSLDNVVVWFPKYKILDGGCFIKSADAKKLGFTGDGDVKAWKPAMARLLAHYPEINLVIPGHDDWKVsQKHIDNTFKLLDE	25	248	88.1423	1	1	0	824	Cluster_1	CLUSTER_NOT_IN_NCBI_AMR_REF_DB	Cluster_0	SP_Sec_SPI_	26-27	SP_Sec_SPI_	26-27	H_x_H_x_D	H_x_x_D_N	C	H	.
B1_193	GCF_002980575.1	1382456	1382456	Sphingobacterium_gobiense	Bacteria-FCB_group-Bacteroidota_Chlorobiota_group-Bacteroidota-Sphingobacteriia-Sphingobacteriales-Sphingobacteriaceae-Sphingobacterium-	4598820	NZ_PVBS01000002.1	class_B1	257.4	-	933335	934001	933324	935795	ATGTTTCAACAAAGGAAGCTTAAAAGCTATCTCACTATCATTATATTGTTTTATTTAAGTATTTCCGCTACAGAAGCGCAGTCTTCGCGTACCGAATGGTTCGAAGATGCGCGTTACGGCATGTTTATCCATTGGGGGCTGTATAGCGCTGCCGAGGGGATGTGGAAAGGAGAACCGCTGCGGTATGCCAACAATTACGCGGAATGGATCCGATACCGCAACCGTATTTCCAAAGAAGAATACGGCGAACTGGCTCAACGGTTTGTTTGGGACAAGATTGACCCTGAAAACTGGGTCTTGCTGGCAAAGGAATCGGGGATGAAATATATCATCATCACCGCAAAACATCACGATGGTGTCGCTTTATGGGACACGAAAGTAGGTCATTATTCCCTACCC…	WP_219847978.1	BlaB_IND_MUS_family_subclass_B1_metallo-beta-lactamase	MFQQRKLKSYLTIIILFYLSISATEAQSSRTEWFEDARYGMFIHWGLYSAAEGMWKGEPLRYANNYAEWIRYRNRISKEEYGELAQRFVWDKIDPENWVLLAKESGMKYIIITAKHHDGVALWDTKVGHYSLPKLSGANRDVIKEIADACRKHDMKLGFYYSHWLDWEHPYAWDHNQELTGRVRDEQFNQYWQEKAIPQMRELLTNYGDIAIMWFDMWIPYEKTIFKREQLEQAVALIRKLQPNCLINSRLGLPTDANYVDFETLGDNQFGTSYIDHPWETPGTIAHSWGYNGQETNWKSTGQLFESLISNVALNGGFTLNIGPRADGSVPHESISRLNDIGKWLRNYGEALFNNTGLDLQVNQHDWGKITKSRKSNTVYLHIFNWPLDGKLRVSGISS…	ORF_OK	TRUE_HIT	eekeeeekdelkiekladnvyvhtsykevegvgkvssngLvvidekevvlvDtpwteeqtekLldwiekklklkvkavistHfHeDrlGGlealnkkgiktyasalTnellkkegkeqakhsfkkeekltlgkekievfypGegHtkDNiVvwlpkekiLfGGClvksaeakslGnlgdAnveeWpksvekvkakypeakiVipGHgevgd.kellehTlklle	QASVSTQDKPLVIEQINPKLYLFTTYHEYEGT-KVSANALYLLTKEGALLFDTPWDPTQYQPLLDSIQEKHDMPVIGVYATHWHEDRAGGFGYYNNIGIPTYATARTNELLRANGKPLAIRKIEEGKTYSVGGESFVFDFFGPGHSMDNVVVWFPEYKILDGGCFIKSSDAKNLGNTSDGDVKEWKPSMARLLAHYPEINLVIPGHDDWKAsEQHIENTFKLLE	25	247	87.747	1	1	0	823	Cluster_0	CLUSTER_NOT_IN_NCBI_AMR_REF_DB	Cluster_0	SP_Sec_SPI_	26-27	SP_Sec_SPI_	26-27	H_x_H_x_D	H_x_x_D_N	C	H	.
B1_194	GCF_002980615.3	1392	1392	Bacillus_anthracis	Bacteria-Terrabacteria_group-Bacillota-Bacilli-Bacillales-Bacillaceae-Bacillus-Bacillus_cereus_group-	5229731	NZ_CP066168.1	class_B1	272.6	-	3217915	3218629	3217913	3218683	ATGAAAAATACATTATTAAAATTAGGGGTATGTGTTAGTTTACTAGGAATAACTCCATTTGTTAGTACAATTTCTTCTGTACAAGCAGAACGAAAGGTAGAGCATAAAGTAATAAAAAATGAGACAGGAACTATTTCAATTTCTCAGTTAAACAAAAATGTTTGGGTTCATACGGAGTTAGGTTATTTTAACGGAGAAGCAGTTCCTTCGAACGGTTTAATCCTTAATACTTCTAAAGGATTAGTACTTGTCGATTCTTCTTGGGATGATAAGTTAACGAAGGAATTAATAGAGATGGCAGAAAAGAAATTTAAGAAGAGTGTAACGGATGTTATTATTACACATGCACACGCTGATCGGATTGGTGGAATAAAAACGTTGAAAGAAAGAGGCATTAAA…	WP_000799223.1	BcII_family_subclass_B1_metallo-beta-lactamase	MKNTLLKLGVCVSLLGITPFVSTISSVQAERKVEHKVIKNETGTISISQLNKNVWVHTELGYFNGEAVPSNGLILNTSKGLVLVDSSWDDKLTKELIEMAEKKFKKSVTDVIITHAHADRIGGIKTLKERGIKAHSTTLTAELAKKNGYEEPLGDLQAITKLKFGNMKVETFYPGKGHTEDNIVVWLPQYNMLVGGCLVKSASAKDLGNITDAYVNEWSTSIENVLKRYENINFVVPGHGEVGDKGLLLHTLDLLK	ORF_OK	TRUE_HIT	llllslaaa........eekeeeekdelkiekladnvyvhtsykevegvgkvssngLvvidekevvlvDtpwteeqtekLldwiekklklkvkavistHfHeDrlGGlealnkkgiktyasalTnellkkegkeqakhsfkkeekltlgkekievfypGegHtkDNiVvwlpkekiLfGGClvksaeakslGnlgdAnveeWpksvekvkakypeakiVipGHgevgdkellehTlklle	TPFVSTISSvqaerkveHKVIKNETGTISISQLNKNVWVHTELGYFNGE-AVPSNGLILNTSKGLVLVDSSWDDKLTKELIEMAEKKFKKSVTDVIITHAHADRIGGIKTLKERGIKAHSTTLTAELAKKNGYEEPLGDLQAITKLKFGNMKVETFYPGKGHTEDNIVVWLPQYNMLVGGCLVKSASAKDLGNITDAYVNEWSTSIENVLKRYENINFVVPGHGEVGDKGLLLHTLDLLK	16	247	91.3043	8	1	0	256	Cluster_137	BcII_family_subclass_B1_metallo-beta-lactamase_NG_047224.1_cds_WP_012261328.1_1	Cluster_139	SP_Sec_SPI_	29-30	SP_Sec_SPI_	29-30	H_x_H_x_D	H_x_x_D_N	C	H	.
B1_195	GCF_002982195.1	550	550	Enterobacter_cloacae	Bacteria-Pseudomonadota-Gammaproteobacteria-Enterobacterales-Enterobacteriaceae-Enterobacter-Enterobacter_cloacae_complex-	5419249	NZ_CP020090.1	class_B1	269.1	+	30840	31608	30805	31617	ATGGAATTGCCCAATATTATGCACCCGGTCGCGAAGCTGAGCACCGCATTAGCCGCTGCATTGATGCTGAGCGGGTGCATGCCCGGTGAAATCCGCCCGACGATTGGCCAGCAAATGGAAACTGGCGACCAACGGTTTGGCGATCTGGTTTTCCGCCAGCTCGCACCGAATGTCTGGCAGCACACTTCCTATCTCGACATGCCGGGTTTCGGGGCAGTCGCTTCCAACGGTTTGATCGTCAGGGATGGCGGCCGCGTGCTGGTGGTCGATACCGCCTGGACCGATGACCAGACCGCCCAGATCCTCAACTGGATCAAGCAGGAGATCAACCTGCCGGTCGCGCTGGCGGTGGTGACTCACGCGCATCAGGACAAGATGGGCGGTATGGACGCGCTGCAT…	WP_004201164.1	subclass_B1_metallo-beta-lactamase_NDM-1	MELPNIMHPVAKLSTALAAALMLSGCMPGEIRPTIGQQMETGDQRFGDLVFRQLAPNVWQHTSYLDMPGFGAVASNGLIVRDGGRVLVVDTAWTDDQTAQILNWIKQEINLPVALAVVTHAHQDKMGGMDALHAAGIATYANALSNQLAPQEGMVAAQHSLTFAANGWVEPATAPNFGPLKVFYPGPGHTSDNITVGIDGTDIAFGGCLIKDSKAKSLGNLGDADTEHYAASARAFGAAFPKASMIVMSHSAPDSRAAITHTARMADKLR	ORF_OK	TRUE_HIT	kllllllllllllslaaa.........eekeeeekdelkiekladnvyvhtsykevegvgkvssngLvvidekevvlvDtpwteeqtekLldwiekklklkvkavistHfHeDrlGGlealnkkgiktyasalTnellkkegkeqakhsfkkeek......ltlgkekievfypGegHtkDNiVvwlpkekiLfGGClvksaeakslGnlgdAnveeWpksvekvkakypeakiVipGHgevgdkellehTlkllek	KLSTALAAALMLSGCMPGeirptigqqMETGDQRFGDLVFRQLAPNVWQHTSYLDMPGFGAVASNGLIVRDGGRVLVVDTAWTDDQTAQILNWIKQEINLPVALAVVTHAHQDKMGGMDALHAAGIATYANALSNQLAPQEGMVAAQHSLTFAANgwvepaTAPNFGPLKVFYPGPGHTSDNITVGIDGTDIAFGGCLIKDSKAKSLGNLGDADTEHYAASARAFGAAFPKASMIVMSHSAPDSRAAITHTARMADK	7	248	95.2569	15	0	0	270	Cluster_118	subclass_B1_metallo-beta-lactamase_NDM-18_NG_052866.1_cds_WP_077064890.1_1	Cluster_120	LIPO_Sec_SPII_	25-26	LIPO_Sec_SPII_	25-26	H_x_H_x_D	H_x_x_D_N	C	H	.
B1_197	GCF_002993365.1	2079529	2079529	Alteromonas_alba	Bacteria-Pseudomonadota-Gammaproteobacteria-Alteromonadales-Alteromonadaceae-Alteromonas_Salinimonas_group-Alteromonas-	5159414	NZ_PVNP01000204.1	class_B1	236.6	-	117136	117781	117125	117853	ATGCCAAACCGTGCTTTGTGGCAGCGTATTGCCATAGTCTTATTGATGCCTATCCTTTCGTTACCGGCACGGGCTGCCAATCTAACGGTAACGCCGCTGAATGACGGGGTTTACCTGATGCGCTCCGAGCGCGCTGTAGAAGGCTTTGGACTGGTGAGCGGTAACGGTTTAATTGTGCAGACAGCGCCGCATAAAGCGGTTTTAATCGACACACCCTGGGACAACAGTGATGTGGATACGCTGTTTAGCTGGCTTGAGTCGCAGGGGCTGAGTCTTGAGGCCGTGGTCGTCACTCATTCGCACGAAGATGCCGGCGGGCATCTGGCACGTTTTCACAGCAAAAATATCCCCTCATGGACGTTTGAGTTAACTAATGAGTACTTAACTCAGAAGGGCGAA…	WP_105936493.1	subclass_B1_metallo-beta-lactamase	MPNRALWQRIAIVLLMPILSLPARAANLTVTPLNDGVYLMRSERAVEGFGLVSGNGLIVQTAPHKAVLIDTPWDNSDVDTLFSWLESQGLSLEAVVVTHSHEDAGGHLARFHSKNIPSWTFELTNEYLTQKGETPAQHTFSNNAWVVPEMIEVFYPGPGHTLDNSVVWVKKHNLLFGGCFIREQATFSLGYTAEGDVRAWPESVSRVTDYFPEVQKVVPGHGKVGDAALLSHTRELALKMLP	ORF_OK	TRUE_HIT	ekdelkiekladnvyvhtsykevegvgkvssngLvv.idekevvlvDtpwteeqtekLldwiekklklkvkavistHfHeDrlGGlealnkkgiktyasalTnellkkegkeqakhsfkkeekltlgkekievfypGegHtkDNiVvwlpkekiLfGGClvksaeakslGnlgdAnveeWpksvekvkakypeakiVipGHgevgdkellehTlkllek	RAANLTVTPLNDGVYLMRSERAVEGFGLVSGNGLIVqTAPHKAVLIDTPWDNSDVDTLFSWLES-QGLSLEAVVVTHSHEDAGGHLARFHSKNIPSWTFELTNEYLTQKGETPAQHTFSNNA--WVVPEMIEVFYPGPGHTLDNSVVWVKKHNLLFGGCFIREQATFSLGYTAEGDVRAWPESVSRVTDYFPEVQKVVPGHGKVGDAALLSHTRELALK	31	248	85.7708	1	3	0	242	Cluster_972	CLUSTER_NOT_IN_NCBI_AMR_REF_DB	Cluster_964	SP_Sec_SPI_	25-26	SP_Sec_SPI_	25-26	H_x_H_x_D	H_x_x_D_N	C	H	.
B1_198	GCF_002994535.1	1155617	1155617	Bacillus_sp_M21	Bacteria-Terrabacteria_group-Bacillota-Bacilli-Bacillales-Bacillaceae-Bacillus-unclassified_Bacillus_in_firmicutes-	5177339	NZ_PVNJ01000013.1	class_B1	277.7	+	133949	134660	133893	134663	ATGAAAAATACATTATTAAAATTAGGGGTATGTGTTAGTTTACTAGGAATAACTCCATTTGTTAGTACAATTTCTTCTGTACAAGCAGAACGAACGATAGAGCATAAAGTAATAAAAAATGAGACAGGAACTATTTCAATTTCTCAGTTAAACAAAAATGTTTGGGTTCATACGGAGTTAGGTTATTTTAACGGAGAAGCAGTTCCTTCGAACGGTTTAATCCTTAATACTTCTAAAGGATTAGTACTTGTCGATTCTTCTTGGGATGATAAGTTAACGAAGGAATTAATAGAGATGGCAGAAAAGAAATTTAAGAAGAGTGTAACGGATGTTATTATTACACATGCACACGCTGATCGGATTGGCGGAATAAAAACGTTGAAAGAAAGAGGCATTAAA…	WP_073525288.1	BcII_family_subclass_B1_metallo-beta-lactamase	MKNTLLKLGVCVSLLGITPFVSTISSVQAERTIEHKVIKNETGTISISQLNKNVWVHTELGYFNGEAVPSNGLILNTSKGLVLVDSSWDDKLTKELIEMAEKKFKKSVTDVIITHAHADRIGGIKTLKERGIKTHSTTLTAELAKKNGYEEPLGDLQTIMKLKFGNMKVETFYPGKGHTEDNIVVWLPQYNMLVGGCLVKSASTKDLGNVTDAYVNEWSTSIENVLKRYENINLVVPGHGEVGDRGLLLHTLDLLK	ORF_OK	TRUE_HIT	lllslaaa........eekeeeekdelkiekladnvyvhtsykevegvgkvssngLvvidekevvlvDtpwteeqtekLldwiekklklkvkavistHfHeDrlGGlealnkkgiktyasalTnellkkegkeqakhsfkkeekltlgkekievfypGegHtkDNiVvwlpkekiLfGGClvksaeakslGnlgdAnveeWpksvekvkakypeakiVipGHgevgdkellehTlklle	PFVSTISSvqaertieHKVIKNETGTISISQLNKNVWVHTELGYFNGE-AVPSNGLILNTSKGLVLVDSSWDDKLTKELIEMAEKKFKKSVTDVIITHAHADRIGGIKTLKERGIKTHSTTLTAELAKKNGYEEPLGDLQTIMKLKFGNMKVETFYPGKGHTEDNIVVWLPQYNMLVGGCLVKSASTKDLGNVTDAYVNEWSTSIENVLKRYENINLVVPGHGEVGDRGLLLHTLDLLK	17	247	90.9091	8	1	0	256	Cluster_137	BcII_family_subclass_B1_metallo-beta-lactamase_NG_047224.1_cds_WP_012261328.1_1	Cluster_139	SP_Sec_SPI_	29-30	SP_Sec_SPI_	29-30	H_x_H_x_D	H_x_x_D_N	C	H	.
B1_199	GCF_002994815.1	1428	1428	Bacillus_thuringiensis	Bacteria-Terrabacteria_group-Bacillota-Bacilli-Bacillales-Bacillaceae-Bacillus-Bacillus_cereus_group-	6383402	NZ_PVMD01000262.1	class_B1	280.7	+	11854	12553	11783	12556	ATGAAAAAGAATACGTTGTTAAAAGTAGGATTATGTGTAGGTTTACTAGGAACAATTCAATTTGTTAGCACAATTTCTTCTGTACAAGCATCACAAAAGGTAGAGAAAACAGTAATAAAAAATGAGACGGGAACCATTTCAATATCTCAGTTAAACAAGAATGTATGGGTTCATACGGAGTTAGGTTCTTTTAATGGAGAAGCAGTTCCTTCGAACGGTCTAGTTCTTAATACTTCTAAAGGGTTAGTACTTGTTGATTCTTCTTGGGATGACAAATTAACGAAGGAACTAATAGAAATGGTAGAAAAGAAGTTTCAGAAGCGTGTAACGGATGTCATTATTACACATGCGCACGCTGATCGAATTGGCGGAATAAAAACGTTGAAAGAAAGAGGAATT…	WP_000742473.1	BcII_family_subclass_B1_metallo-beta-lactamase	MKKNTLLKVGLCVGLLGTIQFVSTISSVQASQKVEKTVIKNETGTISISQLNKNVWVHTELGSFNGEAVPSNGLVLNTSKGLVLVDSSWDDKLTKELIEMVEKKFQKRVTDVIITHAHADRIGGIKTLKERGIKAHSTALTAELAKKSGYEEPLGDLQTVTNLKFGNMKVETFYPGKGHTEDNIVVWLPQYNILVGGCLVKSTSAKDLGNVADAYVNEWSTSIENVLKRYRNINVVVPGHGEVGNKGLLLYTLDLLK	ORF_OK	TRUE_HIT	lllslaaa........eekeeeekdelkiekladnvyvhtsykevegvgkvssngLvvidekevvlvDtpwteeqtekLldwiekklklkvkavistHfHeDrlGGlealnkkgiktyasalTnellkkegkeqakhsfkkeekltlgkekievfypGegHtkDNiVvwlpkekiLfGGClvksaeakslGnlgdAnveeWpksvekvkakypeakiVipGHgevgdkellehTlklle	TIS----SvqasqkveKTVIKNETGTISISQLNKNVWVHTELGSFNGE-AVPSNGLVLNTSKGLVLVDSSWDDKLTKELIEMVEKKFQKRVTDVIITHAHADRIGGIKTLKERGIKAHSTALTAELAKKSGYEEPLGDLQTVTNLKFGNMKVETFYPGKGHTEDNIVVWLPQYNILVGGCLVKSTSAKDLGNVADAYVNEWSTSIENVLKRYRNINVVVPGHGEVGNKGLLLYTLDLLK	17	247	90.9091	8	5	0	257	Cluster_137	BcII_family_subclass_B1_metallo-beta-lactamase_NG_047224.1_cds_WP_012261328.1_1	Cluster_139	SP_Sec_SPI_	30-31	SP_Sec_SPI_	30-31	H_x_H_x_D	H_x_x_D_N	C	H	.
B1_2	GCF_002836895.1	40216	40216	Acinetobacter_radioresistens	Bacteria-Pseudomonadota-Gammaproteobacteria-Moraxellales-Moraxellaceae-Acinetobacter-	3080299	NZ_MLJU01000063.1	class_B1	272.4	-	7083	7851	7075	7887	ATGGAATTGCCCAATATTATGCACCCGGTCGCGAAGCTGAGCACCGCATTAGCCGCTGCATTGATGCTGAGCGGGTGCATGCCCGGTGAAATCCGCCCGACGATTGGCCAGCAAATGGAAACTGGCGACCAACGGTTTGGCGATCTGGTTTTCCGCCAGCTCGCACCGAATGTCTGGCAGCACACTTCCTATCTCGACATGCCGGGTTTCGGGGCAGTCGCTTCCAACGGTTTGATCGTCAGGGATGGCGGCCGCGTGCTGGTGGTCGATACCGCCTGGACCGATGACCAGACCGCCCAGATCCTCAACTGGATCAAGCAGGAGATCAACCTGCCGGTCGCGCTGGCGGTGGTGACTCACGCGCATCAGGACAAGATGGGCGGTATGGACGCGCTGCAT…	WP_004201164.1	subclass_B1_metallo-beta-lactamase_NDM-1	MELPNIMHPVAKLSTALAAALMLSGCMPGEIRPTIGQQMETGDQRFGDLVFRQLAPNVWQHTSYLDMPGFGAVASNGLIVRDGGRVLVVDTAWTDDQTAQILNWIKQEINLPVALAVVTHAHQDKMGGMDALHAAGIATYANALSNQLAPQEGMVAAQHSLTFAANGWVEPATAPNFGPLKVFYPGPGHTSDNITVGIDGTDIAFGGCLIKDSKAKSLGNLGDADTEHYAASARAFGAAFPKASMIVMSHSAPDSRAAITHTARMADKLR	ORF_OK	TRUE_HIT	kllllllllllllslaaa.........eekeeeekdelkiekladnvyvhtsykevegvgkvssngLvvidekevvlvDtpwteeqtekLldwiekklklkvkavistHfHeDrlGGlealnkkgiktyasalTnellkkegkeqakhsfkkeek......ltlgkekievfypGegHtkDNiVvwlpkekiLfGGClvksaeakslGnlgdAnveeWpksvekvkakypeakiVipGHgevgdkellehTlkllek	KLSTALAAALMLSGCMPGeirptigqqMETGDQRFGDLVFRQLAPNVWQHTSYLDMPGFGAVASNGLIVRDGGRVLVVDTAWTDDQTAQILNWIKQEINLPVALAVVTHAHQDKMGGMDALHAAGIATYANALSNQLAPQEGMVAAQHSLTFAANgwvepaTAPNFGPLKVFYPGPGHTSDNITVGIDGTDIAFGGCLIKDSKAKSLGNLGDADTEHYAASARAFGAAFPKASMIVMSHSAPDSRAAITHTARMADK	7	248	95.2569	15	0	0	270	Cluster_118	subclass_B1_metallo-beta-lactamase_NDM-18_NG_052866.1_cds_WP_077064890.1_1	Cluster_120	LIPO_Sec_SPII_	25-26	LIPO_Sec_SPII_	25-26	H_x_H_x_D	H_x_x_D_N	C	H	.
B1_20	GCF_002849695.1	817	817	Bacteroides_fragilis	Bacteria-FCB_group-Bacteroidota_Chlorobiota_group-Bacteroidota-Bacteroidia-Bacteroidales-Bacteroidaceae-Bacteroides-	5315431	NZ_CP018937.1	class_B1	284.1	+	3283108	3283843	3283115	3283864	ATGAAAACAGTATTTATCCTTATCTCCATGCTTTTCCCTGTCGCAGTTATGGCACAGAAAAGCGTAAAAATATCCGATGACATCAGTATCACCCAACTCTCGGACAAAGTGTACACTTATGTATCCCTCGCCGAAATTGAAGGATGGGGCATGGTACCTTCCAACGGGATGATTGTTATCAACAACCACCAGGCAGCGTTGCTGGACACACCTATCAATGACGCACAAACGGAAACGCTGGTCAACTGGGTGACAGACTCTTTGCATGCCAAAGTCACCACGTTTATCCCGAACCACTGGCACGGCGATTGTATTGGCGGACTGGGTTACCTGCAAAAGAAAGGTGTCCAATCATACGCGAACCAGATGACGATAGACCTCGCCAAGGAAAAAGGGTTG…	WP_005780969.1	subclass_B1_metallo-beta-lactamase_CfiA14	MKTVFILISMLFPVAVMAQKSVKISDDISITQLSDKVYTYVSLAEIEGWGMVPSNGMIVINNHQAALLDTPINDAQTETLVNWVTDSLHAKVTTFIPNHWHGDCIGGLGYLQKKGVQSYANQMTIDLAKEKGLPVPEHGFTDSLTVSLDGMPLQCYYLGGGHATDNIVVWLPTENILFGGCMLKDNQATSIGNISDADVTAWPKTLDKVKAKFPSARYVVPGHGDYGGTELIEHTKQIVNQYIESTSKP	ORF_OK	TRUE_HIT	kkklrkllllllllllllslaaaeekeeeekdelkiekladnvyvhtsykevegvgkvssngLvvidekevvlvDtpwteeqtekLldwiekklklkvkavistHfHeDrlGGlealnkkgiktyasalTnellkkegkeqakhsfkkeekltlgkekievfypGegHtkDNiVvwlpkekiLfGGClvksaeakslGnlgdAnveeWpksvekvkakypeakiVipGHgevgdkellehTlkllekak	KNKMKTVFILISMLFPVAVMA---QKSVKISDDISITQLSDKVYTYVSLAEIEGWGMVPSNGMIVINNHQAALLDTPINDAQTETLVNWVTDSLHAKVTTFIPNHWHGDCIGGLGYLQKKGVQSYANQMTIDLAKEKGLPVPEHGFTDSLTVSLDGMPLQCYYLGGGHATDNIVVWLPTENILFGGCMLKDNQATSIGNISDADVTAWPKTLDKVKAKFPSARYVVPGHGDYGGTELIEHTKQIVNQYI	2	250	98.0237	0	3	0	249	Cluster_591	subclass_B1_metallo-beta-lactamase_CfiA11_NG_047630.1_cds_WP_063843236.1_1	Cluster_594	SP_Sec_SPI_	18-19	SP_Sec_SPI_	18-19	H_x_H_x_D	H_x_x_D_N	C	H	.
B1_200	GCF_002994915.1	562	562	Escherichia_coli	Bacteria-Pseudomonadota-Gammaproteobacteria-Enterobacterales-Enterobacteriaceae-Escherichia-	5670137	NZ_PVQI01000096.1	class_B1	269.3	+	42397	43165	42362	43174	ATGGAATTGCCCAATATTATGCACCCGGTCGCGAAGCTGAGCACCGCATTAGCCGCTGCATTGATGCTGAGCGGGTGCATGCCCGGTGAAATCCGCCCGACGATTGGCCAGCAAATGGAAACTGGCGACCAACGGTTTGGCGATCTGGTTTTCCGCCAGCTCGCACCGAATGTCTGGCAGCACACTTCCTATCTCGACATGCCGGGTTTCGGGGCAGTCGCTTCCAACGGTTTGATCGTCAGGGATGGCGGCCGCGTGCTGTTGGTCGATACCGCCTGGACCGATGACCAGACCGCCCAGATCCTCAACTGGATCAAGCAGGAGATCAACCTGCCGGTCGCGCTGGCGGTGGTGACTCACGCGCATCAGGACAAGATGGGCGGTATGGACGCGCTGCAT…	WP_023408309.1	subclass_B1_metallo-beta-lactamase_NDM-5	MELPNIMHPVAKLSTALAAALMLSGCMPGEIRPTIGQQMETGDQRFGDLVFRQLAPNVWQHTSYLDMPGFGAVASNGLIVRDGGRVLLVDTAWTDDQTAQILNWIKQEINLPVALAVVTHAHQDKMGGMDALHAAGIATYANALSNQLAPQEGLVAAQHSLTFAANGWVEPATAPNFGPLKVFYPGPGHTSDNITVGIDGTDIAFGGCLIKDSKAKSLGNLGDADTEHYAASARAFGAAFPKASMIVMSHSAPDSRAAITHTARMADKLR	ORF_OK	TRUE_HIT	kllllllllllllslaaa.........eekeeeekdelkiekladnvyvhtsykevegvgkvssngLvvidekevvlvDtpwteeqtekLldwiekklklkvkavistHfHeDrlGGlealnkkgiktyasalTnellkkegkeqakhsfkkeek......ltlgkekievfypGegHtkDNiVvwlpkekiLfGGClvksaeakslGnlgdAnveeWpksvekvkakypeakiVipGHgevgdkellehTlkllek	KLSTALAAALMLSGCMPGeirptigqqMETGDQRFGDLVFRQLAPNVWQHTSYLDMPGFGAVASNGLIVRDGGRVLLVDTAWTDDQTAQILNWIKQEINLPVALAVVTHAHQDKMGGMDALHAAGIATYANALSNQLAPQEGLVAAQHSLTFAANgwvepaTAPNFGPLKVFYPGPGHTSDNITVGIDGTDIAFGGCLIKDSKAKSLGNLGDADTEHYAASARAFGAAFPKASMIVMSHSAPDSRAAITHTARMADK	7	248	95.2569	15	0	0	270	Cluster_118	subclass_B1_metallo-beta-lactamase_NDM-18_NG_052866.1_cds_WP_077064890.1_1	Cluster_120	LIPO_Sec_SPII_	25-26	LIPO_Sec_SPII_	25-26	H_x_H_x_D	H_x_x_D_N	C	H	.
B1_201	GCF_002994925.1	562	562	Escherichia_coli	Bacteria-Pseudomonadota-Gammaproteobacteria-Enterobacterales-Enterobacteriaceae-Escherichia-	5674901	NZ_PVQG01000033.1	class_B1	269.3	-	2218	2986	2210	3022	ATGGAATTGCCCAATATTATGCACCCGGTCGCGAAGCTGAGCACCGCATTAGCCGCTGCATTGATGCTGAGCGGGTGCATGCCCGGTGAAATCCGCCCGACGATTGGCCAGCAAATGGAAACTGGCGACCAACGGTTTGGCGATCTGGTTTTCCGCCAGCTCGCACCGAATGTCTGGCAGCACACTTCCTATCTCGACATGCCGGGTTTCGGGGCAGTCGCTTCCAACGGTTTGATCGTCAGGGATGGCGGCCGCGTGCTGTTGGTCGATACCGCCTGGACCGATGACCAGACCGCCCAGATCCTCAACTGGATCAAGCAGGAGATCAACCTGCCGGTCGCGCTGGCGGTGGTGACTCACGCGCATCAGGACAAGATGGGCGGTATGGACGCGCTGCAT…	WP_023408309.1	subclass_B1_metallo-beta-lactamase_NDM-5	MELPNIMHPVAKLSTALAAALMLSGCMPGEIRPTIGQQMETGDQRFGDLVFRQLAPNVWQHTSYLDMPGFGAVASNGLIVRDGGRVLLVDTAWTDDQTAQILNWIKQEINLPVALAVVTHAHQDKMGGMDALHAAGIATYANALSNQLAPQEGLVAAQHSLTFAANGWVEPATAPNFGPLKVFYPGPGHTSDNITVGIDGTDIAFGGCLIKDSKAKSLGNLGDADTEHYAASARAFGAAFPKASMIVMSHSAPDSRAAITHTARMADKLR	ORF_OK	TRUE_HIT	kllllllllllllslaaa.........eekeeeekdelkiekladnvyvhtsykevegvgkvssngLvvidekevvlvDtpwteeqtekLldwiekklklkvkavistHfHeDrlGGlealnkkgiktyasalTnellkkegkeqakhsfkkeek......ltlgkekievfypGegHtkDNiVvwlpkekiLfGGClvksaeakslGnlgdAnveeWpksvekvkakypeakiVipGHgevgdkellehTlkllek	KLSTALAAALMLSGCMPGeirptigqqMETGDQRFGDLVFRQLAPNVWQHTSYLDMPGFGAVASNGLIVRDGGRVLLVDTAWTDDQTAQILNWIKQEINLPVALAVVTHAHQDKMGGMDALHAAGIATYANALSNQLAPQEGLVAAQHSLTFAANgwvepaTAPNFGPLKVFYPGPGHTSDNITVGIDGTDIAFGGCLIKDSKAKSLGNLGDADTEHYAASARAFGAAFPKASMIVMSHSAPDSRAAITHTARMADK	7	248	95.2569	15	0	0	270	Cluster_118	subclass_B1_metallo-beta-lactamase_NDM-18_NG_052866.1_cds_WP_077064890.1_1	Cluster_120	LIPO_Sec_SPII_	25-26	LIPO_Sec_SPII_	25-26	H_x_H_x_D	H_x_x_D_N	C	H	.
B1_202	GCF_002994975.1	562	562	Escherichia_coli	Bacteria-Pseudomonadota-Gammaproteobacteria-Enterobacterales-Enterobacteriaceae-Escherichia-	5670451	NZ_PVQH01000101.1	class_B1	269.3	+	42396	43164	42361	43173	ATGGAATTGCCCAATATTATGCACCCGGTCGCGAAGCTGAGCACCGCATTAGCCGCTGCATTGATGCTGAGCGGGTGCATGCCCGGTGAAATCCGCCCGACGATTGGCCAGCAAATGGAAACTGGCGACCAACGGTTTGGCGATCTGGTTTTCCGCCAGCTCGCACCGAATGTCTGGCAGCACACTTCCTATCTCGACATGCCGGGTTTCGGGGCAGTCGCTTCCAACGGTTTGATCGTCAGGGATGGCGGCCGCGTGCTGTTGGTCGATACCGCCTGGACCGATGACCAGACCGCCCAGATCCTCAACTGGATCAAGCAGGAGATCAACCTGCCGGTCGCGCTGGCGGTGGTGACTCACGCGCATCAGGACAAGATGGGCGGTATGGACGCGCTGCAT…	WP_023408309.1	subclass_B1_metallo-beta-lactamase_NDM-5	MELPNIMHPVAKLSTALAAALMLSGCMPGEIRPTIGQQMETGDQRFGDLVFRQLAPNVWQHTSYLDMPGFGAVASNGLIVRDGGRVLLVDTAWTDDQTAQILNWIKQEINLPVALAVVTHAHQDKMGGMDALHAAGIATYANALSNQLAPQEGLVAAQHSLTFAANGWVEPATAPNFGPLKVFYPGPGHTSDNITVGIDGTDIAFGGCLIKDSKAKSLGNLGDADTEHYAASARAFGAAFPKASMIVMSHSAPDSRAAITHTARMADKLR	ORF_OK	TRUE_HIT	kllllllllllllslaaa.........eekeeeekdelkiekladnvyvhtsykevegvgkvssngLvvidekevvlvDtpwteeqtekLldwiekklklkvkavistHfHeDrlGGlealnkkgiktyasalTnellkkegkeqakhsfkkeek......ltlgkekievfypGegHtkDNiVvwlpkekiLfGGClvksaeakslGnlgdAnveeWpksvekvkakypeakiVipGHgevgdkellehTlkllek	KLSTALAAALMLSGCMPGeirptigqqMETGDQRFGDLVFRQLAPNVWQHTSYLDMPGFGAVASNGLIVRDGGRVLLVDTAWTDDQTAQILNWIKQEINLPVALAVVTHAHQDKMGGMDALHAAGIATYANALSNQLAPQEGLVAAQHSLTFAANgwvepaTAPNFGPLKVFYPGPGHTSDNITVGIDGTDIAFGGCLIKDSKAKSLGNLGDADTEHYAASARAFGAAFPKASMIVMSHSAPDSRAAITHTARMADK	7	248	95.2569	15	0	0	270	Cluster_118	subclass_B1_metallo-beta-lactamase_NDM-18_NG_052866.1_cds_WP_077064890.1_1	Cluster_120	LIPO_Sec_SPII_	25-26	LIPO_Sec_SPII_	25-26	H_x_H_x_D	H_x_x_D_N	C	H	.
B1_203	GCF_002995685.1	1117645	1117645	Elizabethkingia_anophelis	Bacteria-FCB_group-Bacteroidota_Chlorobiota_group-Bacteroidota-Flavobacteriia-Flavobacteriales-Weeksellaceae-Elizabethkingia-	4184272	NZ_NWMI01000005.1	class_B1	288.4	-	426925	427654	426908	427654	ATGAAGAATATAATGCGGGCACTGATCCTTGTTTTTGGTTTTATGAGTTTTTTTATGTTTGGACAGGAGAATCCTGACGTCAAAATTGAAAAGCTAAGAGATAATCTGTATGTATACACAACCTACAATACATTTAACGGGACTAGATATGCCGCTAATGCAGTATATCTGGTAACTGATAAGGGTGTTGTGGTTATAGACTGTCCGTGGGGAGAAGACAAATTTAAAAGCTTTACGGACGAGATTTATAAAAAACACGGAAAGAAAGTTATTATGAATATTGCAACACATTCTCATGATGATCGTGCCGGAGGTCTTGAATATTTTGGTAAAATAGGTGCAAAAACTTATTCTACTAAAATGACAGATTCTATTTTAGCAAAAGAGAATAAGCCAAGA…	WP_375600736.1	BlaB_family_subclass_B1_metallo-beta-lactamase	MKNIMRALILVFGFMSFFMFGQENPDVKIEKLRDNLYVYTTYNTFNGTRYAANAVYLVTDKGVVVIDCPWGEDKFKSFTDEIYKKHGKKVIMNIATHSHDDRAGGLEYFGKIGAKTYSTKMTDSILAKENKPRAQYTFDNNKSFKVGKSEFQVYYPGKGHTADNVVVWFPKEKVLVGGCIIKSADSKDLGYIGEAYVNDWTQSVHNIQQKFSGAQYVVAGHDDWKDQRSIQRTLDLINEYQQKQKASN	ORF_OK	TRUE_HIT	klrkllllllllllllslaaaeekeeeekdelkiekladnvyvhtsykevegvgkvssngLvvidekevvlvDtpwteeqtekLldwiekklklkvkavistHfHeDrlGGlealnkkgiktyasalTnellkkegkeqakhsfkkeekltlgkekievfypGegHtkDNiVvwlpkekiLfGGClvksaeakslGnlgdAnveeWpksvekvkakypeakiVipGHgevgdkellehTlkllekakkk	IMKNIMRALILVFGFMSFF----MFGQENPDVKIEKLRDNLYVYTTYNTFNGT-RYAANAVYLVTDKGVVVIDCPWGEDKFKSFTDEIYKKHGKKVIMNIATHSHDDRAGGLEYFGKIGAKTYSTKMTDSILAKENKPRAQYTFDNNKSFKVGKSEFQVYYPGKGHTADNVVVWFPKEKVLVGGCIIKSADSKDLGYIGEAYVNDWTQSVHNIQQKFSGAQYVVAGHDDWKDQRSIQRTLDLINEYQQK	4	252	98.0237	0	5	0	248	Cluster_590	BlaB_family_subclass_B1_metallo-beta-lactamase_NG_047491.1_cds_WP_063842622.1_1	Cluster_593	SP_Sec_SPI_	21-22	SP_Sec_SPI_	21-22	H_x_H_x_D	H_x_x_D_N	C	H	.
B1_204	GCF_002995695.1	1117645	1117645	Elizabethkingia_anophelis	Bacteria-FCB_group-Bacteroidota_Chlorobiota_group-Bacteroidota-Flavobacteriia-Flavobacteriales-Weeksellaceae-Elizabethkingia-	4184369	NZ_NWMM01000002.1	class_B1	288.3	+	45517	46246	45515	46264	ATTATGAAGAATATAATGCGGGCACTGATCCTTGTTTTTGGTTTTATGAGTTTTTTTATGTTTGGACAGGAGAATCCTGACGTCAAAATTGAAAAGCTAAGAGATAATCTGTATGTATACACAACCTACAATACATTTAACGGGACTAGATATGCCGCTAATGCAGTATATCTGGTAACTGATAAGGGTGTTGTGGTTATAGACTGTCCGTGGGGAGAAGACAAATTTAAAAGCTTTACGGACGAGATTTATAAAAAACACGGAAAGAAAGTTATTATGAATATTGCAACACATTCTCATGATGATCGTGCCGGAGGTCTTGAATATTTTGGTAAAATAGGTGCAAAAACTTATTCTACTAAAATGACAGATTCTATTTTAGCAAAAGAGAATAAGCCA…	WP_101360538.1	subclass_B1_metallo-beta-lactamase_BlaB-20	MMKNIMRALILVFGFMSFFMFGQENPDVKIEKLRDNLYVYTTYNTFNGTRYAANAVYLVTDKGVVVIDCPWGEDKFKSFTDEIYKKHGKKVIMNIATHSHDDRAGGLEYFGKIGAKTYSTKMTDSILAKENKPRAQYTFDNNKSFKVGKSEFQVYYPGKGHTADNVVVWFPKEKVLVGGCIIKSADSKDLGYIGEAYVNDWTQSVHNIQQKFSGAQYVVAGHDDWKDQRSIQRTLDLINEYQQKQKASN	ORF_OK	TRUE_HIT	klrkllllllllllllslaaaeekeeeekdelkiekladnvyvhtsykevegvgkvssngLvvidekevvlvDtpwteeqtekLldwiekklklkvkavistHfHeDrlGGlealnkkgiktyasalTnellkkegkeqakhsfkkeekltlgkekievfypGegHtkDNiVvwlpkekiLfGGClvksaeakslGnlgdAnveeWpksvekvkakypeakiVipGHgevgdkellehTlkllekakkk	IMKNIMRALILVFGFMSFF----MFGQENPDVKIEKLRDNLYVYTTYNTFNGT-RYAANAVYLVTDKGVVVIDCPWGEDKFKSFTDEIYKKHGKKVIMNIATHSHDDRAGGLEYFGKIGAKTYSTKMTDSILAKENKPRAQYTFDNNKSFKVGKSEFQVYYPGKGHTADNVVVWFPKEKVLVGGCIIKSADSKDLGYIGEAYVNDWTQSVHNIQQKFSGAQYVVAGHDDWKDQRSIQRTLDLINEYQQK	4	252	98.0237	0	5	0	249	Cluster_590	BlaB_family_subclass_B1_metallo-beta-lactamase_NG_047491.1_cds_WP_063842622.1_1	Cluster_593	SP_Sec_SPI_	22-23	SP_Sec_SPI_	22-23	H_x_H_x_D	H_x_x_D_N	C	H	.
B1_205	GCF_002995725.1	1117645	1117645	Elizabethkingia_anophelis	Bacteria-FCB_group-Bacteroidota_Chlorobiota_group-Bacteroidota-Flavobacteriia-Flavobacteriales-Weeksellaceae-Elizabethkingia-	4181176	NZ_NWMH01000007.1	class_B1	288.4	-	426872	427601	426855	427601	ATGAAGAATATAATGCGGGCACTGATCCTTGTTTTTGGTTTTATGAGTTTTTTTATGTTTGGACAGGAGAATCCTGACGTCAAAATTGAAAAGCTAAGAGATAATCTGTATGTATACACAACCTACAATACATTTAACGGGACTAGATATGCCGCTAATGCAGTATATCTGGTAACTGATAAGGGTGTTGTGGTTATAGACTGTCCGTGGGGAGAAGACAAATTTAAAAGCTTTACGGACGAGATTTATAAAAAACACGGAAAGAAAGTTATTATGAATATTGCAACACATTCTCATGATGATCGTGCCGGAGGTCTTGAATATTTTGGTAAAATAGGTGCAAAAACTTATTCTACTAAAATGACAGATTCTATTTTAGCAAAAGAGAATAAGCCAAGA…	WP_375600736.1	BlaB_family_subclass_B1_metallo-beta-lactamase	MKNIMRALILVFGFMSFFMFGQENPDVKIEKLRDNLYVYTTYNTFNGTRYAANAVYLVTDKGVVVIDCPWGEDKFKSFTDEIYKKHGKKVIMNIATHSHDDRAGGLEYFGKIGAKTYSTKMTDSILAKENKPRAQYTFDNNKSFKVGKSEFQVYYPGKGHTADNVVVWFPKEKVLVGGCIIKSADSKDLGYIGEAYVNDWTQSVHNIQQKFSGAQYVVAGHDDWKDQRSIQRTLDLINEYQQKQKASN	ORF_OK	TRUE_HIT	klrkllllllllllllslaaaeekeeeekdelkiekladnvyvhtsykevegvgkvssngLvvidekevvlvDtpwteeqtekLldwiekklklkvkavistHfHeDrlGGlealnkkgiktyasalTnellkkegkeqakhsfkkeekltlgkekievfypGegHtkDNiVvwlpkekiLfGGClvksaeakslGnlgdAnveeWpksvekvkakypeakiVipGHgevgdkellehTlkllekakkk	IMKNIMRALILVFGFMSFF----MFGQENPDVKIEKLRDNLYVYTTYNTFNGT-RYAANAVYLVTDKGVVVIDCPWGEDKFKSFTDEIYKKHGKKVIMNIATHSHDDRAGGLEYFGKIGAKTYSTKMTDSILAKENKPRAQYTFDNNKSFKVGKSEFQVYYPGKGHTADNVVVWFPKEKVLVGGCIIKSADSKDLGYIGEAYVNDWTQSVHNIQQKFSGAQYVVAGHDDWKDQRSIQRTLDLINEYQQK	4	252	98.0237	0	5	0	248	Cluster_590	BlaB_family_subclass_B1_metallo-beta-lactamase_NG_047491.1_cds_WP_063842622.1_1	Cluster_593	SP_Sec_SPI_	21-22	SP_Sec_SPI_	21-22	H_x_H_x_D	H_x_x_D_N	C	H	.
B1_206	GCF_002996805.1	470	470	Acinetobacter_baumannii	Bacteria-Pseudomonadota-Gammaproteobacteria-Moraxellales-Moraxellaceae-Acinetobacter-Acinetobacter_calcoaceticus_baumannii_complex-	4158175	NZ_CP027528.1	class_B1	263	-	2884443	2885211	2884435	2885247	ATGGAATTGCCCAATATTATGCACCCGGTCGCGAAGCTGAGCACCGCATTAGCCGCTGCATTGATGCTGAGCGGGTGCATGCCCGGTGAAATCCGCCCGACGATTGGCCAGCAAATGGAAACTGGCGACCAACGGTTTGGCGATCTGGTTTTCCGCCAGCTCGCACCGAATGTCTGGCAGCACACTTCCTATCTCGACATGCCGGGTTTCGGGGCAGTCGCTTCCAACGGTTTGATCGTCAGGGATGGCGGCCGCGTGCTGGTGGTCGATACCGCCTGGACCGATGACCAGACCGCCCAGATCCTCAACTGGATCAAGCAGGAGATCAACCTGCCGGTCGCGCTGGCGGTGGTGACTCACGCGCATCAGGACAAGATGGGCGGTATGGACGCGCTGCAT…	WP_004201164.1	subclass_B1_metallo-beta-lactamase_NDM-1	MELPNIMHPVAKLSTALAAALMLSGCMPGEIRPTIGQQMETGDQRFGDLVFRQLAPNVWQHTSYLDMPGFGAVASNGLIVRDGGRVLVVDTAWTDDQTAQILNWIKQEINLPVALAVVTHAHQDKMGGMDALHAAGIATYANALSNQLAPQEGMVAAQHSLTFAANGWVEPATAPNFGPLKVFYPGPGHTSDNITVGIDGTDIAFGGCLIKDSKAKSLGNLGDADTEHYAASARAFGAAFPKASMIVMSHSAPDSRAAITHTARMADKLR	ORF_OK	TRUE_HIT	kllllllllllllslaaa.........eekeeeekdelkiekladnvyvhtsykevegvgkvssngLvvidekevvlvDtpwteeqtekLldwiekklklkvkavistHfHeDrlGGlealnkkgiktyasalTnellkkegkeqakhsfkkeek......ltlgkekievfypGegHtkDNiVvwlpkekiLfGGClvksaeakslGnlgdAnveeWpksvekvkakypeakiVipGHgevgdkellehTlkllek	KLSTALAAALMLSGCMPGeirptigqqMETGDQRFGDLVFRQLAPNVWQHTSYLDMPGFGAVASNGLIVRDGGRVLVVDTAWTDDQTAQILNWIKQEINLPVALAVVTHAHQDKMGGMDALHAAGIATYANALSNQLAPQEGMVAAQHSLTFAANgwvepaTAPNFGPLKVFYPGPGHTSDNITVGIDGTDIAFGGCLIKDSKAKSLGNLGDADTEHYAASARAFGAAFPKASMIVMSHSAPDSRAAITHTARMADK	7	248	95.2569	15	0	0	270	Cluster_118	subclass_B1_metallo-beta-lactamase_NDM-18_NG_052866.1_cds_WP_077064890.1_1	Cluster_120	LIPO_Sec_SPII_	25-26	LIPO_Sec_SPII_	25-26	H_x_H_x_D	H_x_x_D_N	C	H	.
B1_207	GCF_002998055.1	1452	1452	Bacillus_atrophaeus	Bacteria-Terrabacteria_group-Bacillota-Bacilli-Bacillales-Bacillaceae-Bacillus-Bacillus_subtilis_group-	4153751	NZ_PVQM01000001.1	class_B1	261.5	-	549196	549931	549188	549994	TTGAAAATCAGTAAGGGATGGATAGGAAAAGTTGTGTTTAGTTTGTTACTAACATTATCCGTTTTTATGACATCGTTTAATGATCAAATGATTGCTCAATCTAAAAAATCACCTCCCACTCAGATTACCAATCCAGATAAGACGATTGTTTTAACGAAATTGGATGACAAAGTATGGGCACATACGTCATATAATGATTGGAATGGTACTACCTATGACCATAATGGGTTAATCGTTGCTACTTCCAAAGGAATAGTCCTGATTGATACGGCTTGGGGGAACGACCAAAAAACTGAAGAGTTATTAAAGATGATCAAAAAACATTTTAAGAAAAAAGTTGTTCTCGCGTTGATTACTCATGCGCATGATGACAGCATTTCAGGTATTCGGGCGTTACTG…	WP_106046573.1	subclass_B1_metallo-beta-lactamase	MKISKGWIGKVVFSLLLTLSVFMTSFNDQMIAQSKKSPPTQITNPDKTIVLTKLDDKVWAHTSYNDWNGTTYDHNGLIVATSKGIVLIDTAWGNDQKTEELLKMIKKHFKKKVVLALITHAHDDSISGIRALLNQGIDVRSTLLTAKLAKEYGYPSPNPTLDVKPVMKVGNTVIEAFYPGEGHSSDNITVWLPQYNLLFGGCFIKSLDAKDLGNLSDANVEQWDESVKKVIGKYPDVKTVVPGHGNWGDESLLFHTIDLIKQHTHNKS	ORF_OK	TRUE_HIT	lllllllslaaa.............eekeeeekdelkiekladnvyvhtsykevegvgkvssngLvvidekevvlvDtpwteeq.tekLldwiekklklkvkavistHfHeDrlGGlealnkkgiktyasalTnellkkegkeqakhsfkkeekltlgkekievfypGegHtkDNiVvwlpkekiLfGGClvksaeakslGnlgdAnveeWpksvekvkakypeakiVipGHgevgdkellehTlkllekakkk	VFMT-------SfndqmiaqskkspPTQITNPDKTIVLTKLDDKVWAHTSYNDWNGT-TYDHNGLIVATSKGIVLIDTAWGNDQkTEELLKMIKKHFKKKVVLALITHAHDDSISGIRALLNQGIDVRSTLLTAKLAKEYGYPSPNPTLDVKPVMKVGNTVIEAFYPGEGHSSDNITVWLPQYNLLFGGCFIKSLDAKDLGNLSDANVEQWDESVKKVIGKYPDVKTVVPGHGNWGDESLLFHTIDLIKQHTHN	13	252	94.4664	14	8	0	268	Cluster_78	CLUSTER_NOT_IN_NCBI_AMR_REF_DB	Cluster_113	SP_Sec_SPI_	32-33	SP_Sec_SPI_	34-35	H_x_H_x_D	H_x_x_D_N	C	H	.
B1_208	GCF_002998075.1	1452	1452	Bacillus_atrophaeus	Bacteria-Terrabacteria_group-Bacillota-Bacilli-Bacillales-Bacillaceae-Bacillus-Bacillus_subtilis_group-	4216459	NZ_PVQN01000003.1	class_B1	264.4	+	41710	42445	41648	42454	TTGAAAATCAGTAAGGGATGGATAGGAAAAGTTGTGTTTAGTTTGTTACTAACATTATCCGTTTTTATGACATCGTTTAATGATCAAATGATTGCTCAATCTAAAAAATCACCTCCCACTCAGATTACCAATCCAGATAAGACGATTGTTTTAACCAAATTGGATGACAAAGTATGGGCACATACGTCATATAATGATTGGAATGGTACTACCTATGACCATAATGGGTTAATCGTTGCTACTTCCAAAGGAATAGTCCTGATTGATACGGCTTGGGGGAACGACCAAAAAACTGAAGAGTTATTAAAGATGATCAAAAAACATTTTAAGAAAAAAGTTGTTCTCGCGTTGATTACTCATGCGCATGATGACAGCATTTCAGGTATTCGGGCGTTACTG…	WP_106034043.1	subclass_B1_metallo-beta-lactamase	MKISKGWIGKVVFSLLLTLSVFMTSFNDQMIAQSKKSPPTQITNPDKTIVLTKLDDKVWAHTSYNDWNGTTYDHNGLIVATSKGIVLIDTAWGNDQKTEELLKMIKKHFKKKVVLALITHAHDDSISGIRALLNQGIDVRSTLLTAKLAKEYGYPSPNPTLDVKPVMKVGNTVIEAFYPGEGHSSDNITVWLPQYNLLFGGCFIKSLDAKDLGNLSDANVEQWDESVKKVIEKYPDVKTVVPGHGNWGDESLLFHTIDLIKQHTHNKS	ORF_OK	TRUE_HIT	lllllllslaaa.............eekeeeekdelkiekladnvyvhtsykevegvgkvssngLvvidekevvlvDtpwteeq.tekLldwiekklklkvkavistHfHeDrlGGlealnkkgiktyasalTnellkkegkeqakhsfkkeekltlgkekievfypGegHtkDNiVvwlpkekiLfGGClvksaeakslGnlgdAnveeWpksvekvkakypeakiVipGHgevgdkellehTlkllekakkk	VFMT-------SfndqmiaqskkspPTQITNPDKTIVLTKLDDKVWAHTSYNDWNGT-TYDHNGLIVATSKGIVLIDTAWGNDQkTEELLKMIKKHFKKKVVLALITHAHDDSISGIRALLNQGIDVRSTLLTAKLAKEYGYPSPNPTLDVKPVMKVGNTVIEAFYPGEGHSSDNITVWLPQYNLLFGGCFIKSLDAKDLGNLSDANVEQWDESVKKVIEKYPDVKTVVPGHGNWGDESLLFHTIDLIKQHTHN	13	252	94.4664	14	8	0	268	Cluster_78	CLUSTER_NOT_IN_NCBI_AMR_REF_DB	Cluster_113	SP_Sec_SPI_	32-33	SP_Sec_SPI_	34-35	H_x_H_x_D	H_x_x_D_N	C	H	.
B1_209	GCF_002998135.1	1452	1452	Bacillus_atrophaeus	Bacteria-Terrabacteria_group-Bacillota-Bacilli-Bacillales-Bacillaceae-Bacillus-Bacillus_subtilis_group-	4123307	NZ_PVQO01000003.1	class_B1	262.2	-	492331	493063	492323	493129	TTGAAAATTAGCAAGGGACGGATAGGAAAAGTTGTGTTTAGTTTGTTACTAACATTATCCGTTTTTATGACATCGTTTAACGATCAAATGATTGCTCAATCTAAAAAATCATCTCCTACTCAGATTACCAATCCAGATAAGACGATTGTTTTAACGAAATTGGATGACAAAGTATGGGCACATACGTCATATAATGATTGGAATGGCACAACCTATGGCCATAATGGGTTAATCGTTGCTACTTCCAAAGGAATAGTCCTGATTGATACGGCTTGGGGGAACGACCAAAAAACTGAAGAGTTATTAAAGATGATCAAAAAACATTTTAAGAAAAAAGTTGTTCTCGCGTTGATTACTCATGCACATGATGATAGCATTTCAGGTATTCGGGCGTTACTG…	WP_106045059.1	subclass_B1_metallo-beta-lactamase	MKISKGRIGKVVFSLLLTLSVFMTSFNDQMIAQSKKSSPTQITNPDKTIVLTKLDDKVWAHTSYNDWNGTTYGHNGLIVATSKGIVLIDTAWGNDQKTEELLKMIKKHFKKKVVLALITHAHDDSISGIRALLNQGIDVRSTLLTAKLAKEYGYPSPNPTLDVKPVMKVGNTVVEAFYPGEGHSSDNITVWLPQYNLLFGGCFIKSLDAKDLGNLSDANIEQWNDSVKKVIEKYPDVKTVVPGHGNWGDEGLLFHTIDLIKQHTHNKS	ORF_OK	TRUE_HIT	llllllslaaa.............eekeeeekdelkiekladnvyvhtsykevegvgkvssngLvvidekevvlvDtpwteeq.tekLldwiekklklkvkavistHfHeDrlGGlealnkkgiktyasalTnellkkegkeqakhsfkkeekltlgkekievfypGegHtkDNiVvwlpkekiLfGGClvksaeakslGnlgdAnveeWpksvekvkakypeakiVipGHgevgdkellehTlkllekakkk	FMT-------SfndqmiaqskkssPTQITNPDKTIVLTKLDDKVWAHTSYNDWNGT-TYGHNGLIVATSKGIVLIDTAWGNDQkTEELLKMIKKHFKKKVVLALITHAHDDSISGIRALLNQGIDVRSTLLTAKLAKEYGYPSPNPTLDVKPVMKVGNTVVEAFYPGEGHSSDNITVWLPQYNLLFGGCFIKSLDAKDLGNLSDANIEQWNDSVKKVIEKYPDVKTVVPGHGNWGDEGLLFHTIDLIKQHTHN	14	252	94.0711	14	8	0	268	Cluster_78	CLUSTER_NOT_IN_NCBI_AMR_REF_DB	Cluster_113	SP_Sec_SPI_	32-33	SP_Sec_SPI_	34-35	H_x_H_x_D	H_x_x_D_N	C	H	.
B1_21	GCF_002850255.1	1514074	1514074	Pseudoalteromonas_sp_NC201	Bacteria-Pseudomonadota-Gammaproteobacteria-Alteromonadales-Pseudoalteromonadaceae-Pseudoalteromonas-unclassified_Pseudoalteromonas-	5378320	NZ_CP022522.1	class_B1	265.6	-	2985288	2985966	2985271	2985993	ATGAAGTTTTTAGCTCCTTTCTTATTTTTGTTACCCTGTGTGACAGTTGCAACGGAAACATCGACTTTAGTGGTAACACCGATAGCAGAGCATGTTTATAAACATGAATCTTCGCTACACGTTGAACCTTGGGGGTTAGTGGCAGGCTCTGGGCTGATTGTGGTCGACGGTCAAGATGCTTACATTGTTGATACACCTTGGACCGAGCAAGACACAGAAGCACTGCTATTGTGGGCCGAGGACCGCAAGCTCAATATTAAAGGGGCGGTGGTCACGCATTATCATCAAGATGCAAGCGGTGGCCTAGCGGTATTAAATAAACATCAGATCCCAACCTATGCATCAGCCCAAACTAACCATCTATTAGCCCAAAAACACAGCGCTATCGCGTCACATAAT…	WP_102057295.1	subclass_B1_metallo-beta-lactamase	MKFLAPFLFLLPCVTVATETSTLVVTPIAEHVYKHESSLHVEPWGLVAGSGLIVVDGQDAYIVDTPWTEQDTEALLLWAEDRKLNIKGAVVTHYHQDASGGLAVLNKHQIPTYASAQTNHLLAQKHSAIASHNLPQASAAIKSGVVETYYPGAGHSKDNIVVWLPQSKILFAGCFVKSVVSKNLGNLEDASVDEWQASIHKVLSRYPEANMVIPGHGKEGDLSLLHHTVKLIKIEQSKGK	ORF_OK	TRUE_HIT	lllslaaaeekeeeekdelkiekladnvyvhtsykevegvgkvssngLvvidekevvlvDtpwteeqtekLldwiekklklkvkavistHfHeDrlGGlealnkkgiktyasalTnellkkegkeqakhsfkkeekltlgkekievfypGegHtkDNiVvwlpkekiLfGGClvksaeakslGnlgdAnveeWpksvekvkakypeakiVipGHgevgdkellehTlklleka	FLLPCV----TVATETSTLVVTPIAEHVYKHESSLHVEPWGLVAGSGLIVVDGQDAYIVDTPWTEQDTEALLLWAED-RKLNIKGAVVTHYHQDASGGLAVLNKHQIPTYASAQTNHLLAQKHSAIASHNLPQASA-AIKSGVVETYYPGAGHSKDNIVVWLPQSKILFAGCFVKSVVSKNLGNLEDASVDEWQASIHKVLSRYPEANMVIPGHGKEGDLSLLHHTVKLIKIE	17	249	91.6996	0	6	0	240	Cluster_1059	CLUSTER_NOT_IN_NCBI_AMR_REF_DB	Cluster_1050	SP_Sec_SPI_	17-18	SP_Sec_SPI_	22-23	H_x_H_x_D	H_x_x_D_N	C	H	.
B1_212	GCF_002998875.1	155322	155322	Bacillus_toyonensis	Bacteria-Terrabacteria_group-Bacillota-Bacilli-Bacillales-Bacillaceae-Bacillus-Bacillus_cereus_group-	6185057	NZ_PVRN01000005.1	class_B1	274.6	+	278235	278952	278182	278955	ATGAAAAAGACTACATTATTAAAAGTAGGGGTATGTGTAAGTTTACTAGGGTTAACTCAATTTGTTAGCACAATTTCTTCTGTGAAAGCGGAACAAAAGCTAGAGCAAAAAGTAATAAAAAATGAGACAGAAACCATTTCAATTTCTCAGTTAAATAAAAATGTATGGGTTCATACGGAGTTAGGTTATTTTAACGAAGAAGCAGTTCCTTCAAACGGTCTAGTTCTTACTACTTCTAAAGGATTAGTACTTGTCGATTCTTCTTGGGATGATAAGTTAACGAAGGAACTAATAGAGATGGTAGAAAAGAAATTTCAGAAGCGAGTAACGGATGTCATTATTACACATGCGCACGCTGATCGAATTGGCGGAATAAGAACGTTGAAAGAAAGAGGGATT…	WP_097959793.1	BcII_family_subclass_B1_metallo-beta-lactamase	MKKTTLLKVGVCVSLLGLTQFVSTISSVKAEQKLEQKVIKNETETISISQLNKNVWVHTELGYFNEEAVPSNGLVLTTSKGLVLVDSSWDDKLTKELIEMVEKKFQKRVTDVIITHAHADRIGGIRTLKERGIKAHSTALTAELAKKNGYDEPLGDLQTITNMKFGNMKVETFYPGKGHTEDNIVVWLPQYKILAGGCLVKSAEAKDLGNVAEAYVNEWSTSIGNVLKRYGNMNVVLPGHGEVGDKGLLLHTLDLLK	ORF_OK	TRUE_HIT	lllllslaaa........eekeeeekdelkiekladnvyvhtsykevegvgkvssngLvvidekevvlvDtpwteeqtekLldwiekklklkvkavistHfHeDrlGGlealnkkgiktyasalTnellkkegkeqakhsfkkeekltlgkekievfypGegHtkDNiVvwlpkekiLfGGClvksaeakslGnlgdAnveeWpksvekvkakypeakiVipGHgevgdkellehTlklle	LTQFVSTISSvkaeqkleQKVIKNETETISISQLNKNVWVHTELGYFNEE-AVPSNGLVLTTSKGLVLVDSSWDDKLTKELIEMVEKKFQKRVTDVIITHAHADRIGGIRTLKERGIKAHSTALTAELAKKNGYDEPLGDLQTITNMKFGNMKVETFYPGKGHTEDNIVVWLPQYKILAGGCLVKSAEAKDLGNVAEAYVNEWSTSIGNVLKRYGNMNVVLPGHGEVGDKGLLLHTLDLLK	15	247	91.6996	8	1	0	257	Cluster_137	BcII_family_subclass_B1_metallo-beta-lactamase_NG_047224.1_cds_WP_012261328.1_1	Cluster_139	SP_Sec_SPI_	30-31	SP_Sec_SPI_	30-31	H_x_H_x_D	H_x_x_D_N	C	H	.
B1_213	GCF_002998885.1	492670	492670	Bacillus_velezensis	Bacteria-Terrabacteria_group-Bacillota-Bacilli-Bacillales-Bacillaceae-Bacillus-Bacillus_subtilis_group-Bacillus_amyloliquefaciens_group-	3645222	NZ_PVRO01000002.1	class_B1	230.5	-	447692	448397	447687	448436	TTGAGAAAGCTTTCATTATTAATTGCGGGGTTATTTCTATTCGGCCTCTTTACTGCCGGAATGAAACCGGCACACGCGGCGGATGGCTCCGCAGCAAAAGATGTCACTCTCACACAGCTGGCGCCGCATGTTTGGATGCATACAAGCACCGGTACGGCAGACGGAAGTCCCGTCCCTGCGAACGGATTGCTTCTTGAGACTTCCAAAGGAATCGTACTGATTGATACTCCGTGGAATGACAGTCTCACAGAGCAATTAATGACACAAATAAAAAAGCGGTTTCCAGGAAAAAGGATGACCGATGCCATTGTGACACACGCCCATGACGATCGTATCGGCGGGCTGAACACCCTGTACAAATACGGTGTAAAGGTGCACAGCACGAAGCTGACCGCCGAC…	WP_017417467.1	subclass_B1_metallo-beta-lactamase	MRKLSLLIAGLFLFGLFTAGMKPAHAADGSAAKDVTLTQLAPHVWMHTSTGTADGSPVPANGLLLETSKGIVLIDTPWNDSLTEQLMTQIKKRFPGKRMTDAIVTHAHDDRIGGLNTLYKYGVKVHSTKLTADFARQQGYDRPLGDLKNVTKLQFGDMKIETFYPGKGHTEDNMTVWLPEDKLLFGGCLIKALETKEIVPTPGFYPDQWPRAVRKVMKRYQDISIVVPGHGSPGDDRLLPHTISLLKET	ORF_OK	TRUE_HIT	lllllllslaaaeekeeeekdelkiekladnvyvhtsykevegvgkvssngLvvidekevvlvDtpwteeqtekLldwiekkl.klkvkavistHfHeDrlGGlealnkkgiktyasalTnellkkegkeqakhsfkkeekltlgkekievfypGegHtkDNiVvwlpkekiLfGGClvksaeakslGnlgdAnveeWpksvekvkakypeakiVipGHgevgdkellehTlkllek	LFGLFTAGMKPAHAADGSAAKDVTLTQLAPHVWMHTSTGTADGS-PVPANGLLLETSKGIVLIDTPWNDSLTEQLMTQIKKRFpGKRMTDAIVTHAHDDRIGGLNTLYKYGVKVHSTKLTADFARQQGYDRPLGDLKNVTKLQFGDMKIETFYPGKGHTEDNMTVWLPEDKLLFGGCLIKALETKEIVPTPGFYPDQWPRAVRKVMKRYQDISIVVPGHGSPGDDRLLPHTISLLKE	13	248	92.8854	1	1	0	249	Cluster_210	CLUSTER_NOT_IN_NCBI_AMR_REF_DB	Cluster_216	SP_Sec_SPI_	26-27	SP_Sec_SPI_	26-27	H_x_H_x_D	H_x_x_D_N	C	H	.
B1_214	GCF_002998915.1	492670	492670	Bacillus_velezensis	Bacteria-Terrabacteria_group-Bacillota-Bacilli-Bacillales-Bacillaceae-Bacillus-Bacillus_subtilis_group-Bacillus_amyloliquefaciens_group-	3851762	NZ_PVRP01000007.1	class_B1	231.4	-	244003	244684	243998	244687	ATGAAACCGGCAGACGCGGCGGAGGGCTCCGCAGCAAAAGATGTCACTCTCACACAGCTGGCGCCGCATGTTTGGATGCATACAAGCACCGGTACGGCAGACGGAAGTCCCGTCCCTGCGAACGGATTGCTTCTTGAGACTTCCAAAGGAATCGTACTGATTGATACTCCGTGGAATGACAGTCTCACAGAGCAATTAATGACACAAATAAAAAAGCGGTTTCCCGGCAAAAGGATGACCGATGCCATTGTGACACACGCCCATGACGATCGCATCGGCGGGCTGAACACACTGTACAAATACAGCGTAAAGGTGCACAGCACGAAGCTGACCGCCGACTTCGCCCGACAGCAGGGATATGACCGGCCGCTCGGAGATTTGAAAAACGTGACAAAGCTG…	WP_106080336.1	subclass_B1_metallo-beta-lactamase	MKPADAAEGSAAKDVTLTQLAPHVWMHTSTGTADGSPVPANGLLLETSKGIVLIDTPWNDSLTEQLMTQIKKRFPGKRMTDAIVTHAHDDRIGGLNTLYKYSVKVHSTKLTADFARQQGYDRPLGDLKNVTKLQFGDMKIETFYPGKGHTEDNITVWLPEDKLLFGGCLIKALETKEIVPTPGFYPDQWPRAVRKVMKRYQDISIVVPGHGSPGDDRLLPHTISLLKET	ORF_OK	TRUE_HIT	laaaeekeeeekdelkiekladnvyvhtsykevegvgkvssngLvvidekevvlvDtpwteeqtekLldwiekkl.klkvkavistHfHeDrlGGlealnkkgiktyasalTnellkkegkeqakhsfkkeekltlgkekievfypGegHtkDNiVvwlpkekiLfGGClvksaeakslGnlgdAnveeWpksvekvkakypeakiVipGHgevgdkellehTlkllek	MKPADAAEGSAAKDVTLTQLAPHVWMHTSTGTADGS-PVPANGLLLETSKGIVLIDTPWNDSLTEQLMTQIKKRFpGKRMTDAIVTHAHDDRIGGLNTLYKYSVKVHSTKLTADFARQQGYDRPLGDLKNVTKLQFGDMKIETFYPGKGHTEDNITVWLPEDKLLFGGCLIKALETKEIVPTPGFYPDQWPRAVRKVMKRYQDISIVVPGHGSPGDDRLLPHTISLLKE	21	248	89.7233	1	1	0	229	Cluster_1171	CLUSTER_NOT_IN_NCBI_AMR_REF_DB	Cluster_1151	OTHER	0	OTHER	0	H_x_H_x_D	H_x_x_D_N	C	H	.
B1_215	GCF_002998955.1	1890302	1890302	Bacillus_wiedmannii	Bacteria-Terrabacteria_group-Bacillota-Bacilli-Bacillales-Bacillaceae-Bacillus-Bacillus_cereus_group-	5578264	NZ_PVRQ01000005.1	class_B1	280.9	-	65760	66468	65758	66531	ATGAAAAAGGATACATTATTAAAATTAGGGGTATGTGTTAGTTTGCTAGGAACAACTCAATTTGTTAGTACAGTTTTTTCTGTGAAAGCGGAACAAAAGCTAGAGCAAAAAGTAATAAAAAATGAGACAGGAACTATTTCAATTTCTCAGTTAAACAAAAATGTATGGGTTCATACGGAGTTAGGTTATTTTAACGGAGAAGCAGTTCCTTCGAACGGTCTAGTTCTTACTACTTCAAAAGGCTTAGTACTTGTCGATTCTTCTTGGGATGATAAGTTAACGAAGGAATTAATAGAGATGGTAGAAAAGAAATTTAAGCAGCGTGTAACGGATGTCATTATTACACATGCGCATGCTGATCGAATTGGCGGAATAAAAACGTTGAAAGAAAGAGGCATT…	WP_106405566.1	BcII_family_subclass_B1_metallo-beta-lactamase	MKKDTLLKLGVCVSLLGTTQFVSTVFSVKAEQKLEQKVIKNETGTISISQLNKNVWVHTELGYFNGEAVPSNGLVLTTSKGLVLVDSSWDDKLTKELIEMVEKKFKQRVTDVIITHAHADRIGGIKTLKERGIKAHSTALTAELAKKNGYEEPLGDLQTITKLKFENMKVETFYPGKGHTEDNIVVWLPQYNILAGGCLVKSAEAKNLGNVADAYVNEWSTSIENVLKRYGNINAVVPGHGEVGDRGLLLHTLDLLK	ORF_OK	TRUE_HIT	llllllslaaa....eekeeeekdelkiekladnvyvhtsykevegvgkvssngLvvidekevvlvDtpwteeqtekLldwiekklklkvkavistHfHeDrlGGlealnkkgiktyasalTnellkkegkeqakhsfkkeekltlgkekievfypGegHtkDNiVvwlpkekiLfGGClvksaeakslGnlgdAnveeWpksvekvkakypeakiVipGHgevgdkellehTlklle	FVSTVFSVKAEqkleQKVIKNETGTISISQLNKNVWVHTELGYFNGE-AVPSNGLVLTTSKGLVLVDSSWDDKLTKELIEMVEKKFKQRVTDVIITHAHADRIGGIKTLKERGIKAHSTALTAELAKKNGYEEPLGDLQTITKLKFENMKVETFYPGKGHTEDNIVVWLPQYNILAGGCLVKSAEAKNLGNVADAYVNEWSTSIENVLKRYGNINAVVPGHGEVGDRGLLLHTLDLLK	14	247	92.0949	4	1	0	257	Cluster_137	BcII_family_subclass_B1_metallo-beta-lactamase_NG_047224.1_cds_WP_012261328.1_1	Cluster_139	SP_Sec_SPI_	30-31	SP_Sec_SPI_	30-31	H_x_H_x_D	H_x_x_D_N	C	H	.
B1_216	GCF_002998975.1	1890302	1890302	Bacillus_wiedmannii	Bacteria-Terrabacteria_group-Bacillota-Bacilli-Bacillales-Bacillaceae-Bacillus-Bacillus_cereus_group-	5829775	NZ_PVRR01000009.1	class_B1	281.2	+	85167	85872	85102	85875	ATGAAAAAGGATACATTATTAAAATTAGGGGTATGTGTTAGTTTGCTAGGAACAACTCAATTTGTTAGTACAGTTTCTTCTGTGAAAGCGGAACAAAAGCTAGAGCAAAAAGTAATAAAAAATGAGGCAGGAACTATTTCAATTTCTCAGTTAAATAAAAATGTATGGGTTCATACGGAGTTAGGTTATTTTAACGGAGAAGCAGTTCCTTCGAACGGGCTAGTTCTTACTACTTCAAAAGGATTAGTACTTGTCGATTCTTCTTGGGATGATCAGTTAACGAAGGAATTAATAGAGATGGTAGAAAAGAAATTTAAGAAGCGCGTAACGGATGTCATTATTACACATGCGCATGCTGATCGAATTGGCGGAATAAAAACGTTGAAAGAAAGAGGCATT…	WP_106102544.1	BcII_family_subclass_B1_metallo-beta-lactamase	MKKDTLLKLGVCVSLLGTTQFVSTVSSVKAEQKLEQKVIKNEAGTISISQLNKNVWVHTELGYFNGEAVPSNGLVLTTSKGLVLVDSSWDDQLTKELIEMVEKKFKKRVTDVIITHAHADRIGGIKTLKERGIKAHSTALTAELAKKNGYEEPLGDLQTITKLKFENMKVETFYPGKGHTEDNIVVWLPQYNILAGGCLVKSAEAKNLGNVADAYVNEWSTSIENVLKRYGNINAVVPGHGEVGDRGLLLHTLDLLK	ORF_OK	TRUE_HIT	lslaaa........eekeeeekdelkiekladnvyvhtsykevegvgkvssngLvvidekevvlvDtpwteeqtekLldwiekklklkvkavistHfHeDrlGGlealnkkgiktyasalTnellkkegkeqakhsfkkeekltlgkekievfypGegHtkDNiVvwlpkekiLfGGClvksaeakslGnlgdAnveeWpksvekvkakypeakiVipGHgevgdkellehTlklle	VSTVSSvkaeqkleQKVIKNEAGTISISQLNKNVWVHTELGYFNGE-AVPSNGLVLTTSKGLVLVDSSWDDQLTKELIEMVEKKFKKRVTDVIITHAHADRIGGIKTLKERGIKAHSTALTAELAKKNGYEEPLGDLQTITKLKFENMKVETFYPGKGHTEDNIVVWLPQYNILAGGCLVKSAEAKNLGNVADAYVNEWSTSIENVLKRYGNINAVVPGHGEVGDRGLLLHTLDLLK	19	247	90.1186	8	1	0	257	Cluster_137	BcII_family_subclass_B1_metallo-beta-lactamase_NG_047224.1_cds_WP_012261328.1_1	Cluster_139	SP_Sec_SPI_	30-31	SP_Sec_SPI_	30-31	H_x_H_x_D	H_x_x_D_N	C	H	.
B1_217	GCF_002998985.1	1890302	1890302	Bacillus_wiedmannii	Bacteria-Terrabacteria_group-Bacillota-Bacilli-Bacillales-Bacillaceae-Bacillus-Bacillus_cereus_group-	5484064	NZ_PVRU01000003.1	class_B1	279.3	+	52744	53452	52685	53455	ATGAAAAATACATTATTAAAAGTAGGGGTATGTGTTAGTTTATTAGGAACAATGCAATTTGTTAGTACAATTTTTTCTGTGAAAGCGGAACAAAAGCTAGAGCAAAAAGTAATAAAAAATGAGACAGGAACTATTTCAATTTCTCAGTTAAATAAAAATGTATGGGTTCATACGGAGTTAGGTTACTTTAACGGAGAAGCAGTTCCTTCGAACGGGCTAGTTCTTACTACTTCTAAAGGGCTAGTACTTGTCGATTCTTCTTGGGATGATAAGTTAACGAAGGAATTAATAGAGATGGTAGAAAAGAAATTTAAGAAGCGAGTAACGGATGTCATCATTACACATGCGCACGCTGATCGAATTGGCGGAATAAAAACGTTGAAAGAAAGAGGCATTAAG…	WP_088064091.1	BcII_family_subclass_B1_metallo-beta-lactamase	MKNTLLKVGVCVSLLGTMQFVSTIFSVKAEQKLEQKVIKNETGTISISQLNKNVWVHTELGYFNGEAVPSNGLVLTTSKGLVLVDSSWDDKLTKELIEMVEKKFKKRVTDVIITHAHADRIGGIKTLKERGIKAHSTALTAELAKKSGYEEPLGDLQSITNLSFGNMKVETFYPGKGHTEDNIVVWLPQYNILAGGCLVKSAEAKDLGNVADAYVNEWSASIENVLKRYGNINSVVPGHGEVGDKGLLLHTLDLLK	ORF_OK	TRUE_HIT	llllllslaaa........eekeeeekdelkiekladnvyvhtsykevegvgkvssngLvvidekevvlvDtpwteeqtekLldwiekklklkvkavistHfHeDrlGGlealnkkgiktyasalTnellkkegkeqakhsfkkeekltlgkekievfypGegHtkDNiVvwlpkekiLfGGClvksaeakslGnlgdAnveeWpksvekvkakypeakiVipGHgevgdkellehTlklle	FVSTIF----SvkaeqkleQKVIKNETGTISISQLNKNVWVHTELGYFNGE-AVPSNGLVLTTSKGLVLVDSSWDDKLTKELIEMVEKKFKKRVTDVIITHAHADRIGGIKTLKERGIKAHSTALTAELAKKSGYEEPLGDLQSITNLSFGNMKVETFYPGKGHTEDNIVVWLPQYNILAGGCLVKSAEAKDLGNVADAYVNEWSASIENVLKRYGNINSVVPGHGEVGDKGLLLHTLDLLK	14	247	92.0949	8	5	0	256	Cluster_137	BcII_family_subclass_B1_metallo-beta-lactamase_NG_047224.1_cds_WP_012261328.1_1	Cluster_139	SP_Sec_SPI_	29-30	SP_Sec_SPI_	29-30	H_x_H_x_D	H_x_x_D_N	C	H	.
B1_218	GCF_002999015.1	1890302	1890302	Bacillus_wiedmannii	Bacteria-Terrabacteria_group-Bacillota-Bacilli-Bacillales-Bacillaceae-Bacillus-Bacillus_cereus_group-	5695488	NZ_PVRT01000006.1	class_B1	280.3	+	279054	279759	278989	279762	ATGAAAAAGGATACATTATTAAAATTAGGGGTATGTGTTAGTTTGGTAGGAACAACTCAATTTGTTAGTACATTTTCTTCTGTGAAAGCGGAACAAAAGCTAGAGCAAAAAGTAATAAAAAATGAGACAGGAACTATTTCAATTTCTCAGTTAAACAAAAATGTATGGGTTCATACGGAGTTAGGTTATTTTAACGGAGAAGCAGTTCCTTCGAACGGTCTAGTTCTTACTACTTCAAAAGGCTTAGTACTTGTCGATTCTTCTTGGGATGATAAGTTAACGAAGGAATTAATAGAGATGGTAGAAAAGAAATTTAAGAAGCGCGTAACGGATGTCATTATTACACATGCGCATGCTGATCGAATTGGCGGAATAAAAACGTTGAAAGAAAGAGGCATT…	WP_106075033.1	BcII_family_subclass_B1_metallo-beta-lactamase	MKKDTLLKLGVCVSLVGTTQFVSTFSSVKAEQKLEQKVIKNETGTISISQLNKNVWVHTELGYFNGEAVPSNGLVLTTSKGLVLVDSSWDDKLTKELIEMVEKKFKKRVTDVIITHAHADRIGGIKTLKERGIKAHSTALTAELAKKNGYEEPLGDLQTITKLKFENMKVETFYPGKGHTEDNIVVWLPQYNILAGGCLVKSAEAKNLGNVADAYVNEWSTSIENVLKRYGNINAVVPGHGEVGDRGLLLHTLDLLK	ORF_OK	TRUE_HIT	lllllslaaa........eekeeeekdelkiekladnvyvhtsykevegvgkvssngLvvidekevvlvDtpwteeqtekLldwiekklklkvkavistHfHeDrlGGlealnkkgiktyasalTnellkkegkeqakhsfkkeekltlgkekievfypGegHtkDNiVvwlpkekiLfGGClvksaeakslGnlgdAnveeWpksvekvkakypeakiVipGHgevgdkellehTlklle	VSTFS----SvkaeqkleQKVIKNETGTISISQLNKNVWVHTELGYFNGE-AVPSNGLVLTTSKGLVLVDSSWDDKLTKELIEMVEKKFKKRVTDVIITHAHADRIGGIKTLKERGIKAHSTALTAELAKKNGYEEPLGDLQTITKLKFENMKVETFYPGKGHTEDNIVVWLPQYNILAGGCLVKSAEAKNLGNVADAYVNEWSTSIENVLKRYGNINAVVPGHGEVGDRGLLLHTLDLLK	15	247	91.6996	8	5	0	257	Cluster_137	BcII_family_subclass_B1_metallo-beta-lactamase_NG_047224.1_cds_WP_012261328.1_1	Cluster_139	SP_Sec_SPI_	30-31	SP_Sec_SPI_	30-31	H_x_H_x_D	H_x_x_D_N	C	H	.
B1_219	GCF_002999025.1	1890302	1890302	Bacillus_wiedmannii	Bacteria-Terrabacteria_group-Bacillota-Bacilli-Bacillales-Bacillaceae-Bacillus-Bacillus_cereus_group-	5698500	NZ_PVRS01000006.1	class_B1	280.3	-	267662	268367	267660	268433	ATGAAAAAGGATACATTATTAAAATTAGGGGTATGTGTTAGTTTGGTAGGAACAACTCAATTTGTTAGTACATTTTCTTCTGTGAAAGCGGAACAAAAGCTAGAGCAAAAAGTAATAAAAAATGAGACAGGAACTATTTCAATTTCTCAGTTAAACAAAAATGTATGGGTTCATACGGAGTTAGGTTATTTTAACGGAGAAGCAGTTCCTTCGAACGGTCTAGTTCTTACTACTTCAAAAGGCTTAGTACTTGTCGATTCTTCTTGGGATGATAAGTTAACGAAGGAATTAATAGAGATGGTAGAAAAGAAATTTAAGAAGCGCGTAACGGATGTCATTATTACACATGCGCATGCTGATCGAATTGGCGGAATAAAAACGTTGAAAGAAAGAGGCATT…	WP_106075033.1	BcII_family_subclass_B1_metallo-beta-lactamase	MKKDTLLKLGVCVSLVGTTQFVSTFSSVKAEQKLEQKVIKNETGTISISQLNKNVWVHTELGYFNGEAVPSNGLVLTTSKGLVLVDSSWDDKLTKELIEMVEKKFKKRVTDVIITHAHADRIGGIKTLKERGIKAHSTALTAELAKKNGYEEPLGDLQTITKLKFENMKVETFYPGKGHTEDNIVVWLPQYNILAGGCLVKSAEAKNLGNVADAYVNEWSTSIENVLKRYGNINAVVPGHGEVGDRGLLLHTLDLLK	ORF_OK	TRUE_HIT	lllllslaaa........eekeeeekdelkiekladnvyvhtsykevegvgkvssngLvvidekevvlvDtpwteeqtekLldwiekklklkvkavistHfHeDrlGGlealnkkgiktyasalTnellkkegkeqakhsfkkeekltlgkekievfypGegHtkDNiVvwlpkekiLfGGClvksaeakslGnlgdAnveeWpksvekvkakypeakiVipGHgevgdkellehTlklle	VSTFS----SvkaeqkleQKVIKNETGTISISQLNKNVWVHTELGYFNGE-AVPSNGLVLTTSKGLVLVDSSWDDKLTKELIEMVEKKFKKRVTDVIITHAHADRIGGIKTLKERGIKAHSTALTAELAKKNGYEEPLGDLQTITKLKFENMKVETFYPGKGHTEDNIVVWLPQYNILAGGCLVKSAEAKNLGNVADAYVNEWSTSIENVLKRYGNINAVVPGHGEVGDRGLLLHTLDLLK	15	247	91.6996	8	5	0	257	Cluster_137	BcII_family_subclass_B1_metallo-beta-lactamase_NG_047224.1_cds_WP_012261328.1_1	Cluster_139	SP_Sec_SPI_	30-31	SP_Sec_SPI_	30-31	H_x_H_x_D	H_x_x_D_N	C	H	.
B1_22	GCF_002850475.1	492670	492670	Bacillus_velezensis	Bacteria-Terrabacteria_group-Bacillota-Bacilli-Bacillales-Bacillaceae-Bacillus-Bacillus_subtilis_group-Bacillus_amyloliquefaciens_group-	3975220	NZ_CP021011.1	class_B1	230.5	+	3089192	3089897	3089154	3089903	TTGAGAAAGCTTTCATTATTAATTGCGGGGTTATTTCTATTCGGCCTCTTTACTGCCGGAATGAAACCGGCACACGCGGCGGAGAGCTCCGCAGCAAAAGATGTCACTCTCACACAGCTGGCACCGCATGTCTGGATGCATACAAGCATCGGTACGGCAGACGGAAGTCCCGTCCCTGCGAACGGATTGCTTCTTGAAACTTCCAAAGGAATCGTACTGATTGATACTCCGTGGAATGACAGTCTCACAGAGCAATTAATGACAGAAATAAAACAGCGGTTTCCCGGCAAAAGGATGACCGATGCCATTGTGACACACGCCCATGACGATCGCATCGGCGGGCTGAACACACTGTACAAATACGGTGTAAAGGTGCACAGCACGAAGCTGACCGCCGAC…	WP_101562905.1	subclass_B1_metallo-beta-lactamase	MRKLSLLIAGLFLFGLFTAGMKPAHAAESSAAKDVTLTQLAPHVWMHTSIGTADGSPVPANGLLLETSKGIVLIDTPWNDSLTEQLMTEIKQRFPGKRMTDAIVTHAHDDRIGGLNTLYKYGVKVHSTKLTADFARQQGYHRPLGDLKNVTKLQFGDMKIETFYPGKGHTEDNITVWLPEDKLLFGGCLIKALETKEIVPTPGFYPDQWPRAVRKVMKRYQDISIVVPGHGSPGDDRLLPHTISLLKER	ORF_OK	TRUE_HIT	lllllllslaaaeekeeeekdelkiekladnvyvhtsykevegvgkvssngLvvidekevvlvDtpwteeqtekLldwiekkl.klkvkavistHfHeDrlGGlealnkkgiktyasalTnellkkegkeqakhsfkkeekltlgkekievfypGegHtkDNiVvwlpkekiLfGGClvksaeakslGnlgdAnveeWpksvekvkakypeakiVipGHgevgdkellehTlkllek	LFGLFTAGMKPAHAAESSAAKDVTLTQLAPHVWMHTSIGTADGS-PVPANGLLLETSKGIVLIDTPWNDSLTEQLMTEIKQRFpGKRMTDAIVTHAHDDRIGGLNTLYKYGVKVHSTKLTADFARQQGYHRPLGDLKNVTKLQFGDMKIETFYPGKGHTEDNITVWLPEDKLLFGGCLIKALETKEIVPTPGFYPDQWPRAVRKVMKRYQDISIVVPGHGSPGDDRLLPHTISLLKE	13	248	92.8854	1	1	0	249	Cluster_210	CLUSTER_NOT_IN_NCBI_AMR_REF_DB	Cluster_216	SP_Sec_SPI_	26-27	SP_Sec_SPI_	26-27	H_x_H_x_D	H_x_x_D_N	C	H	.
B1_220	GCF_002999175.1	59201	28901	Salmonella_enterica_subsp_enterica	Bacteria-Pseudomonadota-Gammaproteobacteria-Enterobacterales-Enterobacteriaceae-Salmonella-	5009620	NZ_CP026661.1	class_B1	263.7	-	271524	272289	271510	272310	ATGTTAAAAGTTATTAGTAGTTTATTGGTCTACATGACCGCGTCTGTCATGGCTGTCGCAAGTCCGTTAGCCCATTCCGGGGAGCCGAGTGGTGAGTATCCGACAGTCAACGAAATTCCGGTCGGAGAGGTCCGACTTTACCAGATTGCCGATGGTGTTTGGTCGCATATCGCAACGCAGTCGTTTGATGGCGCGGTCTACCCGTCCAATGGTCTCATTGTCCGTGATGGTGATGAGTTGCTTTTGATTGATACAGCGTGGGGTGCGAAAAACACAGCGGCACTTCTCGCGGAGATTGAAAAGCAAATTGGACTTCCCGTAACGCGTGCAGTCTCCACGCACTTTCATGACGACCGCGTCGGCGGCGTTGATGTCCTTCGGGCGGCTGGGGTGGCAACG…	WP_013263789.1	subclass_B1_metallo-beta-lactamase_VIM-1	MLKVISSLLVYMTASVMAVASPLAHSGEPSGEYPTVNEIPVGEVRLYQIADGVWSHIATQSFDGAVYPSNGLIVRDGDELLLIDTAWGAKNTAALLAEIEKQIGLPVTRAVSTHFHDDRVGGVDVLRAAGVATYASPSTRRLAEAEGNEIPTHSLEGLSSSGDAVRFGPVELFYPGAAHSTDNLVVYVPSANVLYGGCAVHELSSTSAGNVADADLAEWPTSVERIQKHYPEAEVVIPGHGLPGGLDLLQHTANVVKAHKNRSVAE	ORF_OK	TRUE_HIT	lllllllllslaaa.............eekeeeekdelkiekladnvyvhtsykevegvgkvssngLvvidekevvlvDtpwteeqtekLldwiekklklkvkavistHfHeDrlGGlealnkkgiktyasalTnellkkegkeqakhsfkkeek..ltlgkekievfypGegHtkDNiVvwlpkekiLfGGClvksaeakslGnlgdAnveeWpksvekvkakypeakiVipGHgevgdkellehTlkllekakkk	SLLVYMTASVMAVAsplahsgepsgeyPTVNEIPVGEVRLYQIADGVWSHIATQSFDGA-VYPSNGLIVRDGDELLLIDTAWGAKNTAALLAEIEKQIGLPVTRAVSTHFHDDRVGGVDVLRAAGVATYASPSTRRLAEAEGNEIPTHSLEGLSSsgDAVRFGPVELFYPGAAHSTDNLVVYVPSANVLYGGCAVHELSSTSAGNVADADLAEWPTSVERIQKHYPEAEVVIPGHGLPGGLDLLQHTANVVKAHKNR	11	252	95.2569	15	1	0	266	Cluster_131	subclass_B1_metallo-beta-lactamase_VIM-1_NG_050336.1_cds_WP_013263789.1_1	Cluster_134	SP_Sec_SPI_	26-27	SP_Sec_SPI_	26-27	H_x_H_x_D	H_x_x_D_N	C	H	.
B1_221	GCF_003001025.1	2082629	2082629	Escherichia_sp_R15	Bacteria-Pseudomonadota-Gammaproteobacteria-Enterobacterales-Enterobacteriaceae-Escherichia-unclassified_Escherichia-	5121407	NZ_PSSH01000073.1	class_B1	271.9	-	2324	3092	2316	3128	ATGGAATTGCCCAATATTATGCACCCGGTCGCGAAGCTGAGCACCGCATTAGCCGCTGCATTGATGCTGAGCGGGTGCATGCCCGGTGAAATCCGCCCGACGATTGGCCAGCAAATGGAAACTGGCGACCAACGGTTTGGCGATCTGGTTTTCCGCCAGCTCGCACCGAATGTCTGGCAGCACACTTCCTATCTCGACATGCCGGGTTTCGGGGCAGTCGCTTCCAACGGTTTGATCGTCAGGGATGGCGGCCGCGTGCTGTTGGTCGATACCGCCTGGACCGATGACCAGACCGCCCAGATCCTCAACTGGATCAAGCAGGAGATCAACCTGCCGGTCGCGCTGGCGGTGGTGACTCACGCGCATCAGGACAAGATGGGCGGTATGGACGCGCTGCAT…	WP_023408309.1	subclass_B1_metallo-beta-lactamase_NDM-5	MELPNIMHPVAKLSTALAAALMLSGCMPGEIRPTIGQQMETGDQRFGDLVFRQLAPNVWQHTSYLDMPGFGAVASNGLIVRDGGRVLLVDTAWTDDQTAQILNWIKQEINLPVALAVVTHAHQDKMGGMDALHAAGIATYANALSNQLAPQEGLVAAQHSLTFAANGWVEPATAPNFGPLKVFYPGPGHTSDNITVGIDGTDIAFGGCLIKDSKAKSLGNLGDADTEHYAASARAFGAAFPKASMIVMSHSAPDSRAAITHTARMADKLR	ORF_OK	TRUE_HIT	kllllllllllllslaaa.........eekeeeekdelkiekladnvyvhtsykevegvgkvssngLvvidekevvlvDtpwteeqtekLldwiekklklkvkavistHfHeDrlGGlealnkkgiktyasalTnellkkegkeqakhsfkkeek......ltlgkekievfypGegHtkDNiVvwlpkekiLfGGClvksaeakslGnlgdAnveeWpksvekvkakypeakiVipGHgevgdkellehTlkllek	KLSTALAAALMLSGCMPGeirptigqqMETGDQRFGDLVFRQLAPNVWQHTSYLDMPGFGAVASNGLIVRDGGRVLLVDTAWTDDQTAQILNWIKQEINLPVALAVVTHAHQDKMGGMDALHAAGIATYANALSNQLAPQEGLVAAQHSLTFAANgwvepaTAPNFGPLKVFYPGPGHTSDNITVGIDGTDIAFGGCLIKDSKAKSLGNLGDADTEHYAASARAFGAAFPKASMIVMSHSAPDSRAAITHTARMADK	7	248	95.2569	15	0	0	270	Cluster_118	subclass_B1_metallo-beta-lactamase_NDM-18_NG_052866.1_cds_WP_077064890.1_1	Cluster_120	LIPO_Sec_SPII_	25-26	LIPO_Sec_SPII_	25-26	H_x_H_x_D	H_x_x_D_N	C	H	.
B1_222	GCF_003002825.1	1469603	1469603	Spirosoma_oryzae	Bacteria-FCB_group-Bacteroidota_Chlorobiota_group-Bacteroidota-Cytophagia-Cytophagales-Cytophagaceae-Spirosoma-	6569981	NZ_PVTE01000028.1	class_B1	275.7	-	8703	9435	8683	9438	ATGCGAAAATTAATCTGTATCTGTCTGGGTTTACTGATTGCCCATGCATCAACGGCGCAATCTGCATCGAAGCCGAAACTGCGGGTTACGCCACTGACAGATGGCGTGTATGTACATACCACCTACGGTATGTATCAGGGCGAACCCGTGCCGTCGAACGGGCTGATTGTCAATACCAGCGACGGCGTCGTGCTGATCGACACGGGCTGGGATACCAAAGACAGTACCGACAACACCTGGCAACTACTTCGCTGGGTGGCCGACAGCTTACGACAACCCGTCCGGCTATGCATCGTCACCCATTCGCACGACGACAAAGTGGGTGGCATTGGCGAGTTGCGGAAAGCAGGCATACGGGTCGTCAGTACGGCCTTGACGGCGCAGAAAACCGTGGCGTCC…	WP_106140236.1	subclass_B1_metallo-beta-lactamase	MRKLICICLGLLIAHASTAQSASKPKLRVTPLTDGVYVHTTYGMYQGEPVPSNGLIVNTSDGVVLIDTGWDTKDSTDNTWQLLRWVADSLRQPVRLCIVTHSHDDKVGGIGELRKAGIRVVSTALTAQKTVASGYESPEDILPADTTFTIGNVPIRTYFPGAGHTSDNIVVWLPRQQILHGGCFVKSVAAFGLGYIGEANLSEWSKSVRRVMDRFGKAKWVIPGHDEWTDTKALEHTLQLLSKHAAAQPHR	ORF_OK	TRUE_HIT	lrkllllllllllllslaaaeekeeeekdelkiekladnvyvhtsykevegvgkvssngLvvidekevvlvDtpwteeq....tekLldwiekklklkvkavistHfHeDrlGGlealnkkgiktyasalTnellkkegkeqakhsfkkeekltlgkekievfypGegHtkDNiVvwlpkekiLfGGClvksaeakslGnlgdAnveeWpksvekvkakypeakiVipGHgevgdkellehTlkllekak	MRKLICICLG--LLIAH--ASTAQSASKPKLRVTPLTDGVYVHTTYGMYQGE-PVPSNGLIVNTSDGVVLIDTGWDTKDstdnTWQLLRWVADSLRQPVRLCIVTHSHDDKVGGIGELRKAGIRVVSTALTAQKTVASGYESPEDILPADTTFTIGNVPIRTYFPGAGHTSDNIVVWLPRQQILHGGCFVKSVAAFGLGYIGEANLSEWSKSVRRVMDRFGKAKWVIPGHDEWTDTKALEHTLQLLSKHA	5	250	96.8379	4	5	0	251	Cluster_467	CLUSTER_NOT_IN_NCBI_AMR_REF_DB	Cluster_477	SP_Sec_SPI_	21-22	SP_Sec_SPI_	21-22	H_x_H_x_D	H_x_x_D_N	C	H	.
B1_223	GCF_003003625.1	1452	1452	Bacillus_atrophaeus	Bacteria-Terrabacteria_group-Bacillota-Bacilli-Bacillales-Bacillaceae-Bacillus-Bacillus_subtilis_group-	4102978	NZ_PVWB01000002.1	class_B1	261.7	+	68364	69099	68302	69108	TTGAAAATTAGCAAAGGATGGATAGGAAAAGTTGTGTTTAGTTTGTTACTAACATTATCCGTTTTTATGACATCGTTTAATGATCAAATGATTGCTCAATCTAAAAAATCACCTCCCACTCAGATTACCAATCCAGATAAGACGATTGTTTTAACGAAATTGGATGACAAAGTATGGGCACATACGTCATATAATGATTGGAATGGTACTACCTATGACCATAATGGGTTAATCGTTGCTACTTCCAAAGGAATAGTCCTGATTGATACGGCTTGGGGGAACGACCAAAAATCTGAAGAGTTATTAAAGATGATCAAAAAACATTTTAAGAAAAAAGTTGTTCTCGCGTTGATTACTCATGCGCATGATGACAGCATTTCAGGTATTCGGGCGTTACTG…	WP_088117264.1	subclass_B1_metallo-beta-lactamase	MKISKGWIGKVVFSLLLTLSVFMTSFNDQMIAQSKKSPPTQITNPDKTIVLTKLDDKVWAHTSYNDWNGTTYDHNGLIVATSKGIVLIDTAWGNDQKSEELLKMIKKHFKKKVVLALITHAHDDSISGIRALLDQGIDVRSTLLTAKLAKEYGYPSPNPTLDVKPVMKVGNTVIEAFYPGEGHSSDNITVWLPQYNLLFGGCFIKSLDAKDLGNLSDANVEQWDESVKKVIEKYPDVKTVVPGHGNWGDESLLFHTIDLIKQHTHNKS	ORF_OK	TRUE_HIT	lllllllslaaa.............eekeeeekdelkiekladnvyvhtsykevegvgkvssngLvvidekevvlvDtpwteeq.tekLldwiekklklkvkavistHfHeDrlGGlealnkkgiktyasalTnellkkegkeqakhsfkkeekltlgkekievfypGegHtkDNiVvwlpkekiLfGGClvksaeakslGnlgdAnveeWpksvekvkakypeakiVipGHgevgdkellehTlkllekakkk	VFMT-------SfndqmiaqskkspPTQITNPDKTIVLTKLDDKVWAHTSYNDWNGT-TYDHNGLIVATSKGIVLIDTAWGNDQkSEELLKMIKKHFKKKVVLALITHAHDDSISGIRALLDQGIDVRSTLLTAKLAKEYGYPSPNPTLDVKPVMKVGNTVIEAFYPGEGHSSDNITVWLPQYNLLFGGCFIKSLDAKDLGNLSDANVEQWDESVKKVIEKYPDVKTVVPGHGNWGDESLLFHTIDLIKQHTHN	13	252	94.4664	14	8	0	268	Cluster_78	CLUSTER_NOT_IN_NCBI_AMR_REF_DB	Cluster_113	SP_Sec_SPI_	32-33	SP_Sec_SPI_	34-35	H_x_H_x_D	H_x_x_D_N	C	H	.
B1_224	GCF_003003645.1	1452	1452	Bacillus_atrophaeus	Bacteria-Terrabacteria_group-Bacillota-Bacilli-Bacillales-Bacillaceae-Bacillus-Bacillus_subtilis_group-	4281282	NZ_PVWA01000001.1	class_B1	261.3	+	190525	191260	190463	191269	TTGAAAATCAGGAAGGGATGGATAGGAAAAGTTGTGTTTAGTTTGTTACTAACATTATCCGTTTTTATGACATCGTTTAATGATCAAATGATTGCTCAATCTAAAAAATCACCTCCCACTCAGATTACCAATCCAGATAAGACGATTGTTTTAACGAAATTGGATGACAAAGTATGGGCACATACGTCATATAATGATTGGAATGGTACTACCTATGACCATAATGGGTTAATCGTTGCTACTTCCAAAGGAATAGTCCTGATTGATACGGCTTGGGGGAACGACCAAAAAACTGAAGAGTTATTAAAGATGATCAAAAAACATTTTAAGAAAAAAGTTGTTCTCGCGTTGATTACTCATGCGCATGATGACAGCATTTCAGGTATTCGGGCGTTACTG…	WP_106359524.1	subclass_B1_metallo-beta-lactamase	MKIRKGWIGKVVFSLLLTLSVFMTSFNDQMIAQSKKSPPTQITNPDKTIVLTKLDDKVWAHTSYNDWNGTTYDHNGLIVATSKGIVLIDTAWGNDQKTEELLKMIKKHFKKKVVLALITHAHDDSISGIRALLDQGIDVRSTLVTAKLAKEYGYPSPNPTLDVKPVMKVGNTVIEAFYPGEGHSSDNITVWLPQYNLLFGGCFIKSLDAKDLGNLSDANVEQWDESVKKVIEKYPDVKTVVPGHGNWGDESLLFHTIDLIKQHTHNKS	ORF_OK	TRUE_HIT	lllllllslaaa.............eekeeeekdelkiekladnvyvhtsykevegvgkvssngLvvidekevvlvDtpwteeq.tekLldwiekklklkvkavistHfHeDrlGGlealnkkgiktyasalTnellkkegkeqakhsfkkeekltlgkekievfypGegHtkDNiVvwlpkekiLfGGClvksaeakslGnlgdAnveeWpksvekvkakypeakiVipGHgevgdkellehTlkllekakkk	VFMT-------SfndqmiaqskkspPTQITNPDKTIVLTKLDDKVWAHTSYNDWNGT-TYDHNGLIVATSKGIVLIDTAWGNDQkTEELLKMIKKHFKKKVVLALITHAHDDSISGIRALLDQGIDVRSTLVTAKLAKEYGYPSPNPTLDVKPVMKVGNTVIEAFYPGEGHSSDNITVWLPQYNLLFGGCFIKSLDAKDLGNLSDANVEQWDESVKKVIEKYPDVKTVVPGHGNWGDESLLFHTIDLIKQHTHN	13	252	94.4664	14	8	0	268	Cluster_78	CLUSTER_NOT_IN_NCBI_AMR_REF_DB	Cluster_113	SP_Sec_SPI_	32-33	SP_Sec_SPI_	34-35	H_x_H_x_D	H_x_x_D_N	C	H	.
B1_225	GCF_003006035.1	470	470	Acinetobacter_baumannii	Bacteria-Pseudomonadota-Gammaproteobacteria-Moraxellales-Moraxellaceae-Acinetobacter-Acinetobacter_calcoaceticus_baumannii_complex-	4228300	NZ_CP027532.1	class_B1	269.7	-	27418	28186	27410	28222	ATGGAATTGCCCAATATTATGCACCCGGTCGCGAAGCTGAGCACCGCATTAGCCGCTGCATTGATGCTGAGCGGGTGCATGCCCGGTGAAATCCGCCCGACGATTGGCCAGCAAATGGAAACTGGCGACCAACGGTTTGGCGATCTGGTTTTCCGCCAGCTCGCACCGAATGTCTGGCAGCACACTTCCTATCTCGACATGCCGGGTTTCGGGGCAGTCGCTTCCAACGGTTTGATCGTCAGGGATGGCGGCCGCGTGCTGGTGGTCGATACCGCCTGGACCGATGACCAGACCGCCCAGATCCTCAACTGGATCAAGCAGGAGATCAACCTGCCGGTCGCGCTGGCGGTGGTGACTCACGCGCATCAGGACAAGATGGGCGGTATGGACGCGCTGCAT…	WP_004201164.1	subclass_B1_metallo-beta-lactamase_NDM-1	MELPNIMHPVAKLSTALAAALMLSGCMPGEIRPTIGQQMETGDQRFGDLVFRQLAPNVWQHTSYLDMPGFGAVASNGLIVRDGGRVLVVDTAWTDDQTAQILNWIKQEINLPVALAVVTHAHQDKMGGMDALHAAGIATYANALSNQLAPQEGMVAAQHSLTFAANGWVEPATAPNFGPLKVFYPGPGHTSDNITVGIDGTDIAFGGCLIKDSKAKSLGNLGDADTEHYAASARAFGAAFPKASMIVMSHSAPDSRAAITHTARMADKLR	ORF_OK	TRUE_HIT	kllllllllllllslaaa.........eekeeeekdelkiekladnvyvhtsykevegvgkvssngLvvidekevvlvDtpwteeqtekLldwiekklklkvkavistHfHeDrlGGlealnkkgiktyasalTnellkkegkeqakhsfkkeek......ltlgkekievfypGegHtkDNiVvwlpkekiLfGGClvksaeakslGnlgdAnveeWpksvekvkakypeakiVipGHgevgdkellehTlkllek	KLSTALAAALMLSGCMPGeirptigqqMETGDQRFGDLVFRQLAPNVWQHTSYLDMPGFGAVASNGLIVRDGGRVLVVDTAWTDDQTAQILNWIKQEINLPVALAVVTHAHQDKMGGMDALHAAGIATYANALSNQLAPQEGMVAAQHSLTFAANgwvepaTAPNFGPLKVFYPGPGHTSDNITVGIDGTDIAFGGCLIKDSKAKSLGNLGDADTEHYAASARAFGAAFPKASMIVMSHSAPDSRAAITHTARMADK	7	248	95.2569	15	0	0	270	Cluster_118	subclass_B1_metallo-beta-lactamase_NDM-18_NG_052866.1_cds_WP_077064890.1_1	Cluster_120	LIPO_Sec_SPII_	25-26	LIPO_Sec_SPII_	25-26	H_x_H_x_D	H_x_x_D_N	C	H	.
B1_226	GCF_003007755.1	562	562	Escherichia_coli	Bacteria-Pseudomonadota-Gammaproteobacteria-Enterobacterales-Enterobacteriaceae-Escherichia-	5350268	NZ_PVOV01000091.1	class_B1	272	+	630	1398	595	1407	ATGGAATTGCCCAATATTATGCACCCGGTCGCGAAGCTGAGCACCGCATTAGCCGCTGCATTGATGCTGAGCGGGTGCATGCCCGGTGAAATCCGCCCGACGATTGGCCAGCAAATGGAAACTGGCGACCAACGGTTTGGCGATCTGGTTTTCCGCCAGCTCGCACCGAATGTCTGGCAGCACACTTCCTATCTCGACATGCCGGGTTTCGGGGCAGTCGCTTCCAACGGTTTGATCGTCAGGGATGGCGGCCGCGTGCTGTTGGTCGATACCGCCTGGACCGATGACCAGACCGCCCAGATCCTCAACTGGATCAAGCAGGAGATCAACCTGCCGGTCGCGCTGGCGGTGGTGACTCACGCGCATCAGGACAAGATGGGCGGTATGGACGCGCTGCAT…	WP_023408309.1	subclass_B1_metallo-beta-lactamase_NDM-5	MELPNIMHPVAKLSTALAAALMLSGCMPGEIRPTIGQQMETGDQRFGDLVFRQLAPNVWQHTSYLDMPGFGAVASNGLIVRDGGRVLLVDTAWTDDQTAQILNWIKQEINLPVALAVVTHAHQDKMGGMDALHAAGIATYANALSNQLAPQEGLVAAQHSLTFAANGWVEPATAPNFGPLKVFYPGPGHTSDNITVGIDGTDIAFGGCLIKDSKAKSLGNLGDADTEHYAASARAFGAAFPKASMIVMSHSAPDSRAAITHTARMADKLR	ORF_OK	TRUE_HIT	kllllllllllllslaaa.........eekeeeekdelkiekladnvyvhtsykevegvgkvssngLvvidekevvlvDtpwteeqtekLldwiekklklkvkavistHfHeDrlGGlealnkkgiktyasalTnellkkegkeqakhsfkkeek......ltlgkekievfypGegHtkDNiVvwlpkekiLfGGClvksaeakslGnlgdAnveeWpksvekvkakypeakiVipGHgevgdkellehTlkllek	KLSTALAAALMLSGCMPGeirptigqqMETGDQRFGDLVFRQLAPNVWQHTSYLDMPGFGAVASNGLIVRDGGRVLLVDTAWTDDQTAQILNWIKQEINLPVALAVVTHAHQDKMGGMDALHAAGIATYANALSNQLAPQEGLVAAQHSLTFAANgwvepaTAPNFGPLKVFYPGPGHTSDNITVGIDGTDIAFGGCLIKDSKAKSLGNLGDADTEHYAASARAFGAAFPKASMIVMSHSAPDSRAAITHTARMADK	7	248	95.2569	15	0	0	270	Cluster_118	subclass_B1_metallo-beta-lactamase_NDM-18_NG_052866.1_cds_WP_077064890.1_1	Cluster_120	LIPO_Sec_SPII_	25-26	LIPO_Sec_SPII_	25-26	H_x_H_x_D	H_x_x_D_N	C	H	.
B1_227	GCF_003007825.1	562	562	Escherichia_coli	Bacteria-Pseudomonadota-Gammaproteobacteria-Enterobacterales-Enterobacteriaceae-Escherichia-	4996853	NZ_PVOX01000078.1	class_B1	272.6	+	297	1065	262	1074	ATGGAATTGCCCAATATTATGCACCCGGTCGCGAAGCTGAGCACCGCATTAGCCGCTGCATTGATGCTGAGCGGGTGCATGCCCGGTGAAATCCGCCCGACGATTGGCCAGCAAATGGAAACTGGCGACCAACGGTTTGGCGATCTGGTTTTCCGCCAGCTCGCACCGAATGTCTGGCAGCACACTTCCTATCTCGACATGCCGGGTTTCGGGGCAGTCGCTTCCAACGGTTTGATCGTCAGGGATGGCGGCCGCGTGCTGGTGGTCGATACCGCCTGGACCGATGACCAGACCGCCCAGATCCTCAACTGGATCAAGCAGGAGATCAACCTGCCGGTCGCGCTGGCGGTGGTGACTCACGCGCATCAGGACAAGATGGGCGGTATGAACGCGCTGCAT…	WP_032495622.1	subclass_B1_metallo-beta-lactamase_NDM-7	MELPNIMHPVAKLSTALAAALMLSGCMPGEIRPTIGQQMETGDQRFGDLVFRQLAPNVWQHTSYLDMPGFGAVASNGLIVRDGGRVLVVDTAWTDDQTAQILNWIKQEINLPVALAVVTHAHQDKMGGMNALHAAGIATYANALSNQLAPQEGLVAAQHSLTFAANGWVEPATAPNFGPLKVFYPGPGHTSDNITVGIDGTDIAFGGCLIKDSKAKSLGNLGDADTEHYAASARAFGAAFPKASMIVMSHSAPDSRAAITHTARMADKLR	ORF_OK	TRUE_HIT	kllllllllllllslaaa.........eekeeeekdelkiekladnvyvhtsykevegvgkvssngLvvidekevvlvDtpwteeqtekLldwiekklklkvkavistHfHeDrlGGlealnkkgiktyasalTnellkkegkeqakhsfkkeek......ltlgkekievfypGegHtkDNiVvwlpkekiLfGGClvksaeakslGnlgdAnveeWpksvekvkakypeakiVipGHgevgdkellehTlkllek	KLSTALAAALMLSGCMPGeirptigqqMETGDQRFGDLVFRQLAPNVWQHTSYLDMPGFGAVASNGLIVRDGGRVLVVDTAWTDDQTAQILNWIKQEINLPVALAVVTHAHQDKMGGMNALHAAGIATYANALSNQLAPQEGLVAAQHSLTFAANgwvepaTAPNFGPLKVFYPGPGHTSDNITVGIDGTDIAFGGCLIKDSKAKSLGNLGDADTEHYAASARAFGAAFPKASMIVMSHSAPDSRAAITHTARMADK	7	248	95.2569	15	0	0	270	Cluster_118	subclass_B1_metallo-beta-lactamase_NDM-18_NG_052866.1_cds_WP_077064890.1_1	Cluster_120	LIPO_Sec_SPII_	25-26	LIPO_Sec_SPII_	25-26	H_x_H_x_D	H_x_x_D_N	C	H	.
B1_228	GCF_003007875.1	562	562	Escherichia_coli	Bacteria-Pseudomonadota-Gammaproteobacteria-Enterobacterales-Enterobacteriaceae-Escherichia-	5385057	NZ_PVOY01000090.1	class_B1	271.5	-	9193	9961	9185	9997	ATGGAATTGCCCAATATTATGCACCCGGTCGCGAAGCTGAGCACCGCATTAGCCGCTGCATTGATGCTGAGCGGGTGCATGCCCGGTGAAATCCGCCCGACGATTGGCCAGCAAATGGAAACTGGCGACCAACGGTTTGGCGATCTGGTTTTCCGCCAGCTCGCACCGAATGTCTGGCAGCACACTTCCTATCTCGACATGCCGGGTTTCGGGGCAGTCGCTTCCAACGGTTTGATCGTCAGGGATGGCGGCCGCGTGCTGTTGGTCGATACCGCCTGGACCGATGACCAGACCGCCCAGATCCTCAACTGGATCAAGCAGGAGATCAACCTGCCGGTCGCGCTGGCGGTGGTGACTCACGCGCATCAGGACAAGATGGGCGGTATGGACGCGCTGCAT…	WP_023408309.1	subclass_B1_metallo-beta-lactamase_NDM-5	MELPNIMHPVAKLSTALAAALMLSGCMPGEIRPTIGQQMETGDQRFGDLVFRQLAPNVWQHTSYLDMPGFGAVASNGLIVRDGGRVLLVDTAWTDDQTAQILNWIKQEINLPVALAVVTHAHQDKMGGMDALHAAGIATYANALSNQLAPQEGLVAAQHSLTFAANGWVEPATAPNFGPLKVFYPGPGHTSDNITVGIDGTDIAFGGCLIKDSKAKSLGNLGDADTEHYAASARAFGAAFPKASMIVMSHSAPDSRAAITHTARMADKLR	ORF_OK	TRUE_HIT	kllllllllllllslaaa.........eekeeeekdelkiekladnvyvhtsykevegvgkvssngLvvidekevvlvDtpwteeqtekLldwiekklklkvkavistHfHeDrlGGlealnkkgiktyasalTnellkkegkeqakhsfkkeek......ltlgkekievfypGegHtkDNiVvwlpkekiLfGGClvksaeakslGnlgdAnveeWpksvekvkakypeakiVipGHgevgdkellehTlkllek	KLSTALAAALMLSGCMPGeirptigqqMETGDQRFGDLVFRQLAPNVWQHTSYLDMPGFGAVASNGLIVRDGGRVLLVDTAWTDDQTAQILNWIKQEINLPVALAVVTHAHQDKMGGMDALHAAGIATYANALSNQLAPQEGLVAAQHSLTFAANgwvepaTAPNFGPLKVFYPGPGHTSDNITVGIDGTDIAFGGCLIKDSKAKSLGNLGDADTEHYAASARAFGAAFPKASMIVMSHSAPDSRAAITHTARMADK	7	248	95.2569	15	0	0	270	Cluster_118	subclass_B1_metallo-beta-lactamase_NDM-18_NG_052866.1_cds_WP_077064890.1_1	Cluster_120	LIPO_Sec_SPII_	25-26	LIPO_Sec_SPII_	25-26	H_x_H_x_D	H_x_x_D_N	C	H	.
B1_229	GCF_003007895.1	562	562	Escherichia_coli	Bacteria-Pseudomonadota-Gammaproteobacteria-Enterobacterales-Enterobacteriaceae-Escherichia-	5260976	NZ_PVOZ01000102.1	class_B1	272.8	+	630	1398	595	1407	ATGGAATTGCCCAATATTATGCACCCGGTCGCGAAGCTGAGCACCGCATTAGCCGCTGCATTGATGCTGAGCGGGTGCATGCCCGGTGAAATCCGCCCGACGATTGGCCAGCAAATGGAAACTGGCGACCAACGGTTTGGCGATCTGGTTTTCCGCCAGCTCGCACCGAATGTCTGGCAGCACACTTCCTATCTCGACATGCCGGGTTTCGGGGCAGTCGCTTCCAACGGTTTGATCGTCAGGGATGGCGGCCGCGTGCTGTTGGTCGATACCGCCTGGACCGATGACCAGACCGCCCAGATCCTCAACTGGATCAAGCAGGAGATCAACCTGCCGGTCGCGCTGGCGGTGGTGACTCACGCGCATCAGGACAAGATGGGCGGTATGGACGCGCTGCAT…	WP_023408309.1	subclass_B1_metallo-beta-lactamase_NDM-5	MELPNIMHPVAKLSTALAAALMLSGCMPGEIRPTIGQQMETGDQRFGDLVFRQLAPNVWQHTSYLDMPGFGAVASNGLIVRDGGRVLLVDTAWTDDQTAQILNWIKQEINLPVALAVVTHAHQDKMGGMDALHAAGIATYANALSNQLAPQEGLVAAQHSLTFAANGWVEPATAPNFGPLKVFYPGPGHTSDNITVGIDGTDIAFGGCLIKDSKAKSLGNLGDADTEHYAASARAFGAAFPKASMIVMSHSAPDSRAAITHTARMADKLR	ORF_OK	TRUE_HIT	kllllllllllllslaaa.........eekeeeekdelkiekladnvyvhtsykevegvgkvssngLvvidekevvlvDtpwteeqtekLldwiekklklkvkavistHfHeDrlGGlealnkkgiktyasalTnellkkegkeqakhsfkkeek......ltlgkekievfypGegHtkDNiVvwlpkekiLfGGClvksaeakslGnlgdAnveeWpksvekvkakypeakiVipGHgevgdkellehTlkllek	KLSTALAAALMLSGCMPGeirptigqqMETGDQRFGDLVFRQLAPNVWQHTSYLDMPGFGAVASNGLIVRDGGRVLLVDTAWTDDQTAQILNWIKQEINLPVALAVVTHAHQDKMGGMDALHAAGIATYANALSNQLAPQEGLVAAQHSLTFAANgwvepaTAPNFGPLKVFYPGPGHTSDNITVGIDGTDIAFGGCLIKDSKAKSLGNLGDADTEHYAASARAFGAAFPKASMIVMSHSAPDSRAAITHTARMADK	7	248	95.2569	15	0	0	270	Cluster_118	subclass_B1_metallo-beta-lactamase_NDM-18_NG_052866.1_cds_WP_077064890.1_1	Cluster_120	LIPO_Sec_SPII_	25-26	LIPO_Sec_SPII_	25-26	H_x_H_x_D	H_x_x_D_N	C	H	.
B1_23	GCF_002850595.1	72407	573	Klebsiella_pneumoniae_subsp_pneumoniae	Bacteria-Pseudomonadota-Gammaproteobacteria-Enterobacterales-Enterobacteriaceae-Klebsiella_Raoultella_group-Klebsiella-	5491836	NZ_NWMY01000030.1	class_B1	271.3	+	4050	4818	4015	4827	ATGGAATTGCCCAATATTATGCACCCGGTCGCGAAGCTGAGCACCGCATTAGCCGCTGCATTGATGCTGAGCGGGTGCATGCCCGGTGAAATCCGCCCGACGATTGGCCAGCAAATGGAAACTGGCGACCAACGGTTTGGCGATCTGGTTTTCCGCCAGCTCGCACCGAATGTCTGGCAGCACACTTCCTATCTCGACATGCCGGGTTTCGGGGCAGTCGCTTCCAACGGTTTGATCGTCAGGGATGGCGGCCGCGTGCTGGTGGTCGATACCGCCTGGACCGATGACCAGACCGCCCAGATCCTCAACTGGATCAAGCAGGAGATCAACCTGCCGGTCGCGCTGGCGGTGGTGACTCACGCGCATCAGGACAAGATGGGCGGTATGGACGCGCTGCAT…	WP_004201164.1	subclass_B1_metallo-beta-lactamase_NDM-1	MELPNIMHPVAKLSTALAAALMLSGCMPGEIRPTIGQQMETGDQRFGDLVFRQLAPNVWQHTSYLDMPGFGAVASNGLIVRDGGRVLVVDTAWTDDQTAQILNWIKQEINLPVALAVVTHAHQDKMGGMDALHAAGIATYANALSNQLAPQEGMVAAQHSLTFAANGWVEPATAPNFGPLKVFYPGPGHTSDNITVGIDGTDIAFGGCLIKDSKAKSLGNLGDADTEHYAASARAFGAAFPKASMIVMSHSAPDSRAAITHTARMADKLR	ORF_OK	TRUE_HIT	kllllllllllllslaaa.........eekeeeekdelkiekladnvyvhtsykevegvgkvssngLvvidekevvlvDtpwteeqtekLldwiekklklkvkavistHfHeDrlGGlealnkkgiktyasalTnellkkegkeqakhsfkkeek......ltlgkekievfypGegHtkDNiVvwlpkekiLfGGClvksaeakslGnlgdAnveeWpksvekvkakypeakiVipGHgevgdkellehTlkllek	KLSTALAAALMLSGCMPGeirptigqqMETGDQRFGDLVFRQLAPNVWQHTSYLDMPGFGAVASNGLIVRDGGRVLVVDTAWTDDQTAQILNWIKQEINLPVALAVVTHAHQDKMGGMDALHAAGIATYANALSNQLAPQEGMVAAQHSLTFAANgwvepaTAPNFGPLKVFYPGPGHTSDNITVGIDGTDIAFGGCLIKDSKAKSLGNLGDADTEHYAASARAFGAAFPKASMIVMSHSAPDSRAAITHTARMADK	7	248	95.2569	15	0	0	270	Cluster_118	subclass_B1_metallo-beta-lactamase_NDM-18_NG_052866.1_cds_WP_077064890.1_1	Cluster_120	LIPO_Sec_SPII_	25-26	LIPO_Sec_SPII_	25-26	H_x_H_x_D	H_x_x_D_N	C	H	.
B1_230	GCF_003007935.1	562	562	Escherichia_coli	Bacteria-Pseudomonadota-Gammaproteobacteria-Enterobacterales-Enterobacteriaceae-Escherichia-	5263577	NZ_PVPB01000103.1	class_B1	271.8	-	8101	8869	8093	8905	ATGGAATTGCCCAATATTATGCACCCGGTCGCGAAGCTGAGCACCGCATTAGCCGCTGCATTGATGCTGAGCGGGTGCATGCCCGGTGAAATCCGCCCGACGATTGGCCAGCAAATGGAAACTGGCGACCAACGGTTTGGCGATCTGGTTTTCCGCCAGCTCGCACCGAATGTCTGGCAGCACACTTCCTATCTCGACATGCCGGGTTTCGGGGCAGTCGCTTCCAACGGTTTGATCGTCAGGGATGGCGGCCGCGTGCTGTTGGTCGATACCGCCTGGACCGATGACCAGACCGCCCAGATCCTCAACTGGATCAAGCAGGAGATCAACCTGCCGGTCGCGCTGGCGGTGGTGACTCACGCGCATCAGGACAAGATGGGCGGTATGGACGCGCTGCAT…	WP_023408309.1	subclass_B1_metallo-beta-lactamase_NDM-5	MELPNIMHPVAKLSTALAAALMLSGCMPGEIRPTIGQQMETGDQRFGDLVFRQLAPNVWQHTSYLDMPGFGAVASNGLIVRDGGRVLLVDTAWTDDQTAQILNWIKQEINLPVALAVVTHAHQDKMGGMDALHAAGIATYANALSNQLAPQEGLVAAQHSLTFAANGWVEPATAPNFGPLKVFYPGPGHTSDNITVGIDGTDIAFGGCLIKDSKAKSLGNLGDADTEHYAASARAFGAAFPKASMIVMSHSAPDSRAAITHTARMADKLR	ORF_OK	TRUE_HIT	kllllllllllllslaaa.........eekeeeekdelkiekladnvyvhtsykevegvgkvssngLvvidekevvlvDtpwteeqtekLldwiekklklkvkavistHfHeDrlGGlealnkkgiktyasalTnellkkegkeqakhsfkkeek......ltlgkekievfypGegHtkDNiVvwlpkekiLfGGClvksaeakslGnlgdAnveeWpksvekvkakypeakiVipGHgevgdkellehTlkllek	KLSTALAAALMLSGCMPGeirptigqqMETGDQRFGDLVFRQLAPNVWQHTSYLDMPGFGAVASNGLIVRDGGRVLLVDTAWTDDQTAQILNWIKQEINLPVALAVVTHAHQDKMGGMDALHAAGIATYANALSNQLAPQEGLVAAQHSLTFAANgwvepaTAPNFGPLKVFYPGPGHTSDNITVGIDGTDIAFGGCLIKDSKAKSLGNLGDADTEHYAASARAFGAAFPKASMIVMSHSAPDSRAAITHTARMADK	7	248	95.2569	15	0	0	270	Cluster_118	subclass_B1_metallo-beta-lactamase_NDM-18_NG_052866.1_cds_WP_077064890.1_1	Cluster_120	LIPO_Sec_SPII_	25-26	LIPO_Sec_SPII_	25-26	H_x_H_x_D	H_x_x_D_N	C	H	.
B1_231	GCF_003007965.1	562	562	Escherichia_coli	Bacteria-Pseudomonadota-Gammaproteobacteria-Enterobacterales-Enterobacteriaceae-Escherichia-	5355665	NZ_PVPC01000110.1	class_B1	271.6	+	673	1441	638	1450	ATGGAATTGCCCAATATTATGCACCCGGTCGCGAAGCTGAGCACCGCATTAGCCGCTGCATTGATGCTGAGCGGGTGCATGCCCGGTGAAATCCGCCCGACGATTGGCCAGCAAATGGAAACTGGCGACCAACGGTTTGGCGATCTGGTTTTCCGCCAGCTCGCACCGAATGTCTGGCAGCACACTTCCTATCTCGACATGCCGGGTTTCGGGGCAGTCGCTTCCAACGGTTTGATCGTCAGGGATGGCGGCCGCGTGCTGTTGGTCGATACCGCCTGGACCGATGACCAGACCGCCCAGATCCTCAACTGGATCAAGCAGGAGATCAACCTGCCGGTCGCGCTGGCGGTGGTGACTCACGCGCATCAGGACAAGATGGGCGGTATGGACGCGCTGCAT…	WP_023408309.1	subclass_B1_metallo-beta-lactamase_NDM-5	MELPNIMHPVAKLSTALAAALMLSGCMPGEIRPTIGQQMETGDQRFGDLVFRQLAPNVWQHTSYLDMPGFGAVASNGLIVRDGGRVLLVDTAWTDDQTAQILNWIKQEINLPVALAVVTHAHQDKMGGMDALHAAGIATYANALSNQLAPQEGLVAAQHSLTFAANGWVEPATAPNFGPLKVFYPGPGHTSDNITVGIDGTDIAFGGCLIKDSKAKSLGNLGDADTEHYAASARAFGAAFPKASMIVMSHSAPDSRAAITHTARMADKLR	ORF_OK	TRUE_HIT	kllllllllllllslaaa.........eekeeeekdelkiekladnvyvhtsykevegvgkvssngLvvidekevvlvDtpwteeqtekLldwiekklklkvkavistHfHeDrlGGlealnkkgiktyasalTnellkkegkeqakhsfkkeek......ltlgkekievfypGegHtkDNiVvwlpkekiLfGGClvksaeakslGnlgdAnveeWpksvekvkakypeakiVipGHgevgdkellehTlkllek	KLSTALAAALMLSGCMPGeirptigqqMETGDQRFGDLVFRQLAPNVWQHTSYLDMPGFGAVASNGLIVRDGGRVLLVDTAWTDDQTAQILNWIKQEINLPVALAVVTHAHQDKMGGMDALHAAGIATYANALSNQLAPQEGLVAAQHSLTFAANgwvepaTAPNFGPLKVFYPGPGHTSDNITVGIDGTDIAFGGCLIKDSKAKSLGNLGDADTEHYAASARAFGAAFPKASMIVMSHSAPDSRAAITHTARMADK	7	248	95.2569	15	0	0	270	Cluster_118	subclass_B1_metallo-beta-lactamase_NDM-18_NG_052866.1_cds_WP_077064890.1_1	Cluster_120	LIPO_Sec_SPII_	25-26	LIPO_Sec_SPII_	25-26	H_x_H_x_D	H_x_x_D_N	C	H	.
B1_232	GCF_003007995.1	562	562	Escherichia_coli	Bacteria-Pseudomonadota-Gammaproteobacteria-Enterobacterales-Enterobacteriaceae-Escherichia-	5349208	NZ_PVPF01000077.1	class_B1	273	+	630	1398	595	1407	ATGGAATTGCCCAATATTATGCACCCGGTCGCGAAGCTGAGCACCGCATTAGCCGCTGCATTGATGCTGAGCGGGTGCATGCCCGGTGAAATCCGCCCGACGATTGGCCAGCAAATGGAAACTGGCGACCAACGGTTTGGCGATCTGGTTTTCCGCCAGCTCGCACCGAATGTCTGGCAGCACACTTCCTATCTCGACATGCCGGGTTTCGGGGCAGTCGCTTCCAACGGTTTGATCGTCAGGGATGGCGGCCGCGTGCTGGTGGTCGATACCGCCTGGACCGATGACCAGACCGCCCAGATCCTCAACTGGATCAAGCAGGAGATCAACCTGCCGGTCGCGCTGGCGGTGGTGACTCACGCGCATCAGGACAAGATGGGCGGTATGGACGCGCTGCAT…	WP_004201164.1	subclass_B1_metallo-beta-lactamase_NDM-1	MELPNIMHPVAKLSTALAAALMLSGCMPGEIRPTIGQQMETGDQRFGDLVFRQLAPNVWQHTSYLDMPGFGAVASNGLIVRDGGRVLVVDTAWTDDQTAQILNWIKQEINLPVALAVVTHAHQDKMGGMDALHAAGIATYANALSNQLAPQEGMVAAQHSLTFAANGWVEPATAPNFGPLKVFYPGPGHTSDNITVGIDGTDIAFGGCLIKDSKAKSLGNLGDADTEHYAASARAFGAAFPKASMIVMSHSAPDSRAAITHTARMADKLR	ORF_OK	TRUE_HIT	kllllllllllllslaaa.........eekeeeekdelkiekladnvyvhtsykevegvgkvssngLvvidekevvlvDtpwteeqtekLldwiekklklkvkavistHfHeDrlGGlealnkkgiktyasalTnellkkegkeqakhsfkkeek......ltlgkekievfypGegHtkDNiVvwlpkekiLfGGClvksaeakslGnlgdAnveeWpksvekvkakypeakiVipGHgevgdkellehTlkllek	KLSTALAAALMLSGCMPGeirptigqqMETGDQRFGDLVFRQLAPNVWQHTSYLDMPGFGAVASNGLIVRDGGRVLVVDTAWTDDQTAQILNWIKQEINLPVALAVVTHAHQDKMGGMDALHAAGIATYANALSNQLAPQEGMVAAQHSLTFAANgwvepaTAPNFGPLKVFYPGPGHTSDNITVGIDGTDIAFGGCLIKDSKAKSLGNLGDADTEHYAASARAFGAAFPKASMIVMSHSAPDSRAAITHTARMADK	7	248	95.2569	15	0	0	270	Cluster_118	subclass_B1_metallo-beta-lactamase_NDM-18_NG_052866.1_cds_WP_077064890.1_1	Cluster_120	LIPO_Sec_SPII_	25-26	LIPO_Sec_SPII_	25-26	H_x_H_x_D	H_x_x_D_N	C	H	.
B1_233	GCF_003008235.1	562	562	Escherichia_coli	Bacteria-Pseudomonadota-Gammaproteobacteria-Enterobacterales-Enterobacteriaceae-Escherichia-	5360105	NZ_PVPD01000104.1	class_B1	272.8	+	630	1398	595	1407	ATGGAATTGCCCAATATTATGCACCCGGTCGCGAAGCTGAGCACCGCATTAGCCGCTGCATTGATGCTGAGCGGGTGCATGCCCGGTGAAATCCGCCCGACGATTGGCCAGCAAATGGAAACTGGCGACCAACGGTTTGGCGATCTGGTTTTCCGCCAGCTCGCACCGAATGTCTGGCAGCACACTTCCTATCTCGACATGCCGGGTTTCGGGGCAGTCGCTTCCAACGGTTTGATCGTCAGGGATGGCGGCCGCGTGCTGTTGGTCGATACCGCCTGGACCGATGACCAGACCGCCCAGATCCTCAACTGGATCAAGCAGGAGATCAACCTGCCGGTCGCGCTGGCGGTGGTGACTCACGCGCATCAGGACAAGATGGGCGGTATGGACGCGCTGCAT…	WP_023408309.1	subclass_B1_metallo-beta-lactamase_NDM-5	MELPNIMHPVAKLSTALAAALMLSGCMPGEIRPTIGQQMETGDQRFGDLVFRQLAPNVWQHTSYLDMPGFGAVASNGLIVRDGGRVLLVDTAWTDDQTAQILNWIKQEINLPVALAVVTHAHQDKMGGMDALHAAGIATYANALSNQLAPQEGLVAAQHSLTFAANGWVEPATAPNFGPLKVFYPGPGHTSDNITVGIDGTDIAFGGCLIKDSKAKSLGNLGDADTEHYAASARAFGAAFPKASMIVMSHSAPDSRAAITHTARMADKLR	ORF_OK	TRUE_HIT	kllllllllllllslaaa.........eekeeeekdelkiekladnvyvhtsykevegvgkvssngLvvidekevvlvDtpwteeqtekLldwiekklklkvkavistHfHeDrlGGlealnkkgiktyasalTnellkkegkeqakhsfkkeek......ltlgkekievfypGegHtkDNiVvwlpkekiLfGGClvksaeakslGnlgdAnveeWpksvekvkakypeakiVipGHgevgdkellehTlkllek	KLSTALAAALMLSGCMPGeirptigqqMETGDQRFGDLVFRQLAPNVWQHTSYLDMPGFGAVASNGLIVRDGGRVLLVDTAWTDDQTAQILNWIKQEINLPVALAVVTHAHQDKMGGMDALHAAGIATYANALSNQLAPQEGLVAAQHSLTFAANgwvepaTAPNFGPLKVFYPGPGHTSDNITVGIDGTDIAFGGCLIKDSKAKSLGNLGDADTEHYAASARAFGAAFPKASMIVMSHSAPDSRAAITHTARMADK	7	248	95.2569	15	0	0	270	Cluster_118	subclass_B1_metallo-beta-lactamase_NDM-18_NG_052866.1_cds_WP_077064890.1_1	Cluster_120	LIPO_Sec_SPII_	25-26	LIPO_Sec_SPII_	25-26	H_x_H_x_D	H_x_x_D_N	C	H	.
B1_234	GCF_003009615.1	562	562	Escherichia_coli	Bacteria-Pseudomonadota-Gammaproteobacteria-Enterobacterales-Enterobacteriaceae-Escherichia-	5441572	NZ_PGKL01000069.1	class_B1	272.6	+	658	1426	623	1435	ATGGAATTGCCCAATATTATGCACCCGGTCGCGAAGCTGAGCACCGCATTAGCCGCTGCATTGATGCTGAGCGGGTGCATGCCCGGTGAAATCCGCCCGACGATTGGCCAGCAAATGGAAACTGGCGACCAACGGTTTGGCGATCTGGTTTTCCGCCAGCTCGCACCGAATGTCTGGCAGCACACTTCCTATCTCGACATGCCGGGTTTCGGGGCAGTCGCTTCCAACGGTTTGATCGTCAGGGATGGCGGCCGCGTGCTGGTGGTCGATACCGCCTGGACCGATGACCAGACCGCCCAGATCCTCAACTGGATCAAGCAGGAGATCAACCTGCCGGTCGCGCTGGCGGTGGTGACTCACGCGCATCAGGACAAGATGGGCGGTATGGACGCGCTGCAT…	WP_004201164.1	subclass_B1_metallo-beta-lactamase_NDM-1	MELPNIMHPVAKLSTALAAALMLSGCMPGEIRPTIGQQMETGDQRFGDLVFRQLAPNVWQHTSYLDMPGFGAVASNGLIVRDGGRVLVVDTAWTDDQTAQILNWIKQEINLPVALAVVTHAHQDKMGGMDALHAAGIATYANALSNQLAPQEGMVAAQHSLTFAANGWVEPATAPNFGPLKVFYPGPGHTSDNITVGIDGTDIAFGGCLIKDSKAKSLGNLGDADTEHYAASARAFGAAFPKASMIVMSHSAPDSRAAITHTARMADKLR	ORF_OK	TRUE_HIT	kllllllllllllslaaa.........eekeeeekdelkiekladnvyvhtsykevegvgkvssngLvvidekevvlvDtpwteeqtekLldwiekklklkvkavistHfHeDrlGGlealnkkgiktyasalTnellkkegkeqakhsfkkeek......ltlgkekievfypGegHtkDNiVvwlpkekiLfGGClvksaeakslGnlgdAnveeWpksvekvkakypeakiVipGHgevgdkellehTlkllek	KLSTALAAALMLSGCMPGeirptigqqMETGDQRFGDLVFRQLAPNVWQHTSYLDMPGFGAVASNGLIVRDGGRVLVVDTAWTDDQTAQILNWIKQEINLPVALAVVTHAHQDKMGGMDALHAAGIATYANALSNQLAPQEGMVAAQHSLTFAANgwvepaTAPNFGPLKVFYPGPGHTSDNITVGIDGTDIAFGGCLIKDSKAKSLGNLGDADTEHYAASARAFGAAFPKASMIVMSHSAPDSRAAITHTARMADK	7	248	95.2569	15	0	0	270	Cluster_118	subclass_B1_metallo-beta-lactamase_NDM-18_NG_052866.1_cds_WP_077064890.1_1	Cluster_120	LIPO_Sec_SPII_	25-26	LIPO_Sec_SPII_	25-26	H_x_H_x_D	H_x_x_D_N	C	H	.
B1_235	GCF_003012025.1	492670	492670	Bacillus_velezensis	Bacteria-Terrabacteria_group-Bacillota-Bacilli-Bacillales-Bacillaceae-Bacillus-Bacillus_subtilis_group-Bacillus_amyloliquefaciens_group-	4248631	NZ_PVHM01000012.1	class_B1	230.8	-	322550	323255	322545	323294	TTGAGAAAGCTTTCATTATTAATTGCGGGGTTATTTCTATTCGGCCTCTTTACTGCCGGAATGAAACCGGCACATGCGGCGGATGGCTCCGCAGCAAAAGATGTCACTCTCACACAGCTGGCGCCGCATGTCTGGATGCATACAAGCATCGGTACGGCAGACGGAAGTCCCGTCCCTGCGAACGGATTGCTTCTTGAGACTTCCAAAGGAATCGTACTGATTGATACTCCGTGGAATGACAGTCTCACAGAGCAATTAATGACACAAATAAAAAAGCGGTTTCCCGGAAAAAGGATGACCGATGCCATTGTGACACACGCCCATGATGATCGTATCGGCGGTCTGAACACCCTGTACAAATACGGTGTAAAGGTGCACAGCACGAAACTGACCGCCGAC…	WP_014417441.1	subclass_B1_metallo-beta-lactamase	MRKLSLLIAGLFLFGLFTAGMKPAHAADGSAAKDVTLTQLAPHVWMHTSIGTADGSPVPANGLLLETSKGIVLIDTPWNDSLTEQLMTQIKKRFPGKRMTDAIVTHAHDDRIGGLNTLYKYGVKVHSTKLTADFARQQGYDRPLGDLKNVTKLQFGDMKIETFYPGKGHTEDNMTVWLPEDKLLFGGCLIKALETKEIVPTPGFYPDQWPRAVRKVMKRYQDISIVVPGHGSPGDDRLLPHTISLLKET	ORF_OK	TRUE_HIT	lllllllslaaaeekeeeekdelkiekladnvyvhtsykevegvgkvssngLvvidekevvlvDtpwteeqtekLldwiekkl.klkvkavistHfHeDrlGGlealnkkgiktyasalTnellkkegkeqakhsfkkeekltlgkekievfypGegHtkDNiVvwlpkekiLfGGClvksaeakslGnlgdAnveeWpksvekvkakypeakiVipGHgevgdkellehTlkllek	LFGLFTAGMKPAHAADGSAAKDVTLTQLAPHVWMHTSIGTADGS-PVPANGLLLETSKGIVLIDTPWNDSLTEQLMTQIKKRFpGKRMTDAIVTHAHDDRIGGLNTLYKYGVKVHSTKLTADFARQQGYDRPLGDLKNVTKLQFGDMKIETFYPGKGHTEDNMTVWLPEDKLLFGGCLIKALETKEIVPTPGFYPDQWPRAVRKVMKRYQDISIVVPGHGSPGDDRLLPHTISLLKE	13	248	92.8854	1	1	0	249	Cluster_210	CLUSTER_NOT_IN_NCBI_AMR_REF_DB	Cluster_216	SP_Sec_SPI_	26-27	SP_Sec_SPI_	26-27	H_x_H_x_D	H_x_x_D_N	C	H	.
B1_236	GCF_003012835.1	1393	1393	Brevibacillus_brevis	Bacteria-Terrabacteria_group-Bacillota-Bacilli-Bacillales-Paenibacillaceae-Brevibacillus-	6613222	NZ_PXXZ01000022.1	class_B1	262.3	-	107511	108222	107491	108309	TTGAAGACTCATAAGGGTTGGATAGGGAAAGCTGTATGTAGTTTGTTCCTGACAGTCGCTGTTGCTCTGACATCTTTTTCTGATCAAACGGTTGCCCAAGCTACAACATCAAGTCCCACTCAGATTACCAATCCAGGGAAAAGCATTGTGTTAACAAAATTAAATGACAAAGTATGGTTACATACATCCTATCATGAGTGGAATGGCACAACCTATGACCACAATGGCGTAATCGTTTCTACTTCCAAAGGAGTCGTCCTGATTGATACAGCCTGGGGGGACAACCAAAAAACGGAAGAGCTATTACAGATGATCAAGAAGCATTGGAAGAAAGACGTTGTACTGGCTCTGATTACGCATGCACATGATGACAGCATTTCAGGTATCCGGGCTTTACTC…	WP_106655719.1	subclass_B1_metallo-beta-lactamase	MKTHKGWIGKAVCSLFLTVAVALTSFSDQTVAQATTSSPTQITNPGKSIVLTKLNDKVWLHTSYHEWNGTTYDHNGVIVSTSKGVVLIDTAWGDNQKTEELLQMIKKHWKKDVVLALITHAHDDSISGIRALLDQKIDVRSTRLTAKLAKEYGYPSPNPTLDEKPVIKVGDTILEAYYPGEGHSKDNITVWLPQSKILFGGCFVKALGANDLGNLSDANVEQWDDSVQKVIEKYPQVETVVPGHGKTGGKNLLDHTMELIKQHSQEQETALK	ORF_OK	TRUE_HIT	a.........eekeeeekdelkiekladnvyvhtsykevegvgkvssngLvvidekevvlvDtpwteeq.tekLldwiekklklkvkavistHfHeDrlGGlealnkkgiktyasalTnellkkegkeqakhsfkkeekltlgkekievfypGegHtkDNiVvwlpkekiLfGGClvksaeakslGnlgdAnveeWpksvekvkakypeakiVipGHgevgdkellehTlkllekakkk	QtvaqattssPTQITNPGKSIVLTKLNDKVWLHTSYHEWNGT-TYDHNGVIVSTSKGVVLIDTAWGDNQkTEELLQMIKKHWKKDVVLALITHAHDDSISGIRALLDQKIDVRSTRLTAKLAKEYGYPSPNPTLDEKPVIKVGDTILEAYYPGEGHSKDNITVWLPQSKILFGGCFVKALGANDLGNLSDANVEQWDDSVQKVIEKYPQVETVVPGHGKTGGKNLLDHTMELIKQHSQE	24	252	90.1186	10	1	0	272	Cluster_78	CLUSTER_NOT_IN_NCBI_AMR_REF_DB	Cluster_78	SP_Sec_SPI_	34-35	SP_Sec_SPI_	34-35	H_x_H_x_D	H_x_x_D_N	C	H	.
B1_237	GCF_003013315.1	1396	1396	Bacillus_cereus	Bacteria-Terrabacteria_group-Bacillota-Bacilli-Bacillales-Bacillaceae-Bacillus-Bacillus_cereus_group-	5431893	NZ_CP026678.1	class_B1	266	+	4261432	4262143	4261367	4262146	ATGAAAAAGAATACGTTGTTAAAAGTAGGATTATGTGTAAGTTTACTAGGAACAACTCAATTTGTTAGCACGATTTCTTCTGTACAAGCATTACAAAAGGTAGAGCAAATAGTAATCAAAAATGAGACGGGAACCATTTCAATATCTCAGTTAAATAAGAATGTATGGGTTCATACGGAGTTAGGTTATTTTAATGGAGAAGCAGTTCCTTCGAACGGTCTAGTTCTTAATACTTCTAAAGGGTTAGTACTTGTTGATTCTTCTTGGGATAACAAATTAACGAAGGAACTAATAGAAATGGTAGAAAAGAAATTTCAGAAGCGCGTAACGGATGTCATTATTACACATGCGCACGCTGATCGAATTGGCGGAATAACAGCGTTGAAAGAAAGAGGCATT…	WP_106824552.1	BcII_family_subclass_B1_metallo-beta-lactamase	MKKNTLLKVGLCVSLLGTTQFVSTISSVQALQKVEQIVIKNETGTISISQLNKNVWVHTELGYFNGEAVPSNGLVLNTSKGLVLVDSSWDNKLTKELIEMVEKKFQKRVTDVIITHAHADRIGGITALKERGIKVHSTALTAELAKNSGYEEPLGDLQTITSLKFGNTKVETFYPGKGHTEDNIVVWLPQYQILAGGCLVKSAEAKDLGNVADAYVNEWSTSIENVLKRYGNININSVVPGHGEVGDKGLLLHTLDLLK	ORF_OK	TRUE_HIT	lslaaa........eekeeeekdelkiekladnvyvhtsykevegvgkvssngLvvidekevvlvDtpwteeqtekLldwiekklklkvkavistHfHeDrlGGlealnkkgiktyasalTnellkkegkeqakhsfkkeekltlgkekievfypGegHtkDNiVvwlpkekiLfGGClvksaeakslGnlgdAnveeWpksvekvkakypeaki..VipGHgevgdkellehTlklle	VSTISSvqalqkveQIVIKNETGTISISQLNKNVWVHTELGYFNGE-AVPSNGLVLNTSKGLVLVDSSWDNKLTKELIEMVEKKFQKRVTDVIITHAHADRIGGITALKERGIKVHSTALTAELAKNSGYEEPLGDLQTITSLKFGNTKVETFYPGKGHTEDNIVVWLPQYQILAGGCLVKSAEAKDLGNVADAYVNEWSTSIENVLKRYGNINInsVVPGHGEVGDKGLLLHTLDLLK	19	247	90.1186	10	1	0	259	Cluster_137	BcII_family_subclass_B1_metallo-beta-lactamase_NG_047224.1_cds_WP_012261328.1_1	Cluster_139	SP_Sec_SPI_	30-31	SP_Sec_SPI_	30-31	H_x_H_x_D	H_x_x_D_N	C	H	.
B1_238	GCF_003013405.1	54913	54913	Brevibacillus_formosus	Bacteria-Terrabacteria_group-Bacillota-Bacilli-Bacillales-Paenibacillaceae-Brevibacillus-	6184213	NZ_PXZL01000012.1	class_B1	262.4	+	98563	99292	98495	99313	TTGAAGATTCATAAGGGATGGATAGGGAAAACAATATGCAGTTTGTTCCTGACAGTGGCCGTTGCTCTGACATCTTTTTCTAATCAAACGATTGCCCAGGCTACAACATCAACTCCCACCCAGATTACCAATCCAGGGAAAAGCATTGTGTTAACAAAATTAAATGACAAAGTATGGTTACATACATCCTATCAAGAATGGAATGGCGCAATCTTTGACCACAATGGCTTAATTGTTTCTACTTCCAAAGGAGTTGTCCTGATTGATACAGCCTGGGGGGACACCCAAAAAACGGAAGAGCTCTTACAGATGATCAAGAAGCATTGGAAGAAAGACGTTGTGCTAGCGCTGATTACACATGCACATGATGACAGCATTTCAGGTATCCGGGCATTACTC…	WP_047071243.1	subclass_B1_metallo-beta-lactamase	MKIHKGWIGKTICSLFLTVAVALTSFSNQTIAQATTSTPTQITNPGKSIVLTKLNDKVWLHTSYQEWNGAIFDHNGLIVSTSKGVVLIDTAWGDTQKTEELLQMIKKHWKKDVVLALITHAHDDSISGIRALLNQKIDVRSTRLTAKLAKEYGYPSPNPTLDEKPVIKLGDTILEAYYPGEGHSKDNITVWLPQSKILFGGCFVKALGAKDLGNLSDANVEQWDDSVQKVIEKYPHIETVVPGHGKTGGKNLLDHTMELIKQHSQNQEAALK	ORF_OK	TRUE_HIT	llslaaa.........eekeeeekdelkiekladnvyvhtsykevegvgkvssngLvvidekevvlvDtpwteeq.tekLldwiekklklkvkavistHfHeDrlGGlealnkkgiktyasalTnellkkegkeqakhsfkkeekltlgkekievfypGegHtkDNiVvwlpkekiLfGGClvksaeakslGnlgdAnveeWpksvekvkakypeakiVipGHgevgdkellehTlkllekakkk	LTSFSNQtiaqattstPTQITNPGKSIVLTKLNDKVWLHTSYQEWNGA-IFDHNGLIVSTSKGVVLIDTAWGDTQkTEELLQMIKKHWKKDVVLALITHAHDDSISGIRALLNQKIDVRSTRLTAKLAKEYGYPSPNPTLDEKPVIKLGDTILEAYYPGEGHSKDNITVWLPQSKILFGGCFVKALGAKDLGNLSDANVEQWDDSVQKVIEKYPHIETVVPGHGKTGGKNLLDHTMELIKQHSQN	18	252	92.4901	10	1	0	272	Cluster_78	CLUSTER_NOT_IN_NCBI_AMR_REF_DB	Cluster_78	SP_Sec_SPI_	34-35	SP_Sec_SPI_	34-35	H_x_H_x_D	H_x_x_D_N	C	H	.
B1_239	GCF_003013445.1	2126351	2126351	Brevibacillus_sp_NRRL_NRS-603	Bacteria-Terrabacteria_group-Bacillota-Bacilli-Bacillales-Paenibacillaceae-Brevibacillus-unclassified_Brevibacillus-	6220277	NZ_PXZN01000008.1	class_B1	264.4	+	98543	99263	98466	99284	TTGAAGATTCGTAAGGGATGGATAGGGAAAATGATATGCAGTTTGTTCCTGACAGTGGCCGTTGCTCTAACAACTTTTTCTAATCAAACGATTGCCCAGACTACAACATCAACTCCCACCCAGATTACCAATCCAGGGAAAAGCATTGTGTTAACAAAATTAAATGACAAAGTATGGTTACATACATCTTATCAGGAATGGAATGGCGCAACCTATGACCACAATGGCTTAATCGTTTCTACTTCCAAAGGAGTTGTCCTGATTGATACAGCCTGGGGCGACACCCAAAAAACGGAAGAGCTCTTACAGATGATCAAGAAGCATTGGAAGAAAGACGTTGTGCTAGCGCTGATTACACATGCACATGATGACAGCATTTCAGGTATCCGGGCATTACTC…	WP_106778688.1	subclass_B1_metallo-beta-lactamase	MKIRKGWIGKMICSLFLTVAVALTTFSNQTIAQTTTSTPTQITNPGKSIVLTKLNDKVWLHTSYQEWNGATYDHNGLIVSTSKGVVLIDTAWGDTQKTEELLQMIKKHWKKDVVLALITHAHDDSISGIRALLDQKIDVRSTRLTAKLAKEYGYPSPNPTLDEKPVIKLGDTILEAYYPGEGHTKDNITVWLPQSKILFGGCFVKALGAKDLGNLSDANVEQWDDSVQKVIEKYPHIETVVPGHGKTGGKNLLDHTMELIKQHSQKQEAALK	ORF_OK	TRUE_HIT	laaa.........eekeeeekdelkiekladnvyvhtsykevegvgkvssngLvvidekevvlvDtpwteeq.tekLldwiekklklkvkavistHfHeDrlGGlealnkkgiktyasalTnellkkegkeqakhsfkkeekltlgkekievfypGegHtkDNiVvwlpkekiLfGGClvksaeakslGnlgdAnveeWpksvekvkakypeakiVipGHgevgdkellehTlkllekakkk	FSNQtiaqtttstPTQITNPGKSIVLTKLNDKVWLHTSYQEWNGA-TYDHNGLIVSTSKGVVLIDTAWGDTQkTEELLQMIKKHWKKDVVLALITHAHDDSISGIRALLDQKIDVRSTRLTAKLAKEYGYPSPNPTLDEKPVIKLGDTILEAYYPGEGHTKDNITVWLPQSKILFGGCFVKALGAKDLGNLSDANVEQWDDSVQKVIEKYPHIETVVPGHGKTGGKNLLDHTMELIKQHSQK	21	252	91.3043	10	1	0	272	Cluster_78	CLUSTER_NOT_IN_NCBI_AMR_REF_DB	Cluster_78	SP_Sec_SPI_	32-33	SP_Sec_SPI_	32-33	H_x_H_x_D	H_x_x_D_N	C	H	.
B1_24	GCF_002850625.1	299766	158836	Enterobacter_hormaechei_subsp_steigerwaltii	Bacteria-Pseudomonadota-Gammaproteobacteria-Enterobacterales-Enterobacteriaceae-Enterobacter-Enterobacter_cloacae_complex-	5363131	NZ_PDVT01000036.1	class_B1	306.6	+	108	816	112	852	ATGAGCAAGTTATCTGTATTCTTTATATTTTTGTTTTGCAGCATTGCTACCGCAGCAGAGTCTTTGCCAGATTTAAAAATTGAAAAGCTTGATGAAGGCGTTTATGTTCATACTTCGTTTGAAGAAGTTAACGGGTGGGGCGTTGTTCCTAAACATGGTTTGGTGGTTCTTGTAAATGCTGAGGCTTATCTAATTGACACTCCATTTACGGCTAAAGATACTGAAAAGTTAGTCACTTGGTTTGTGGAGCGTGGCTATAAAATAAAAGGCAGTATTTCCTCTCATTTTCATAGCGACAGCACGGGCGGAATAGAGTGGCTTAATTCTCGATCTATCCCCACGTATGCATCTGAATTAACAAATGAACTGCTTAAAAAAGACGGCAAGGTTCAAGCCACA…	WP_003159548.1	subclass_B1_metallo-beta-lactamase_IMP-1	MSKLSVFFIFLFCSIATAAESLPDLKIEKLDEGVYVHTSFEEVNGWGVVPKHGLVVLVNAEAYLIDTPFTAKDTEKLVTWFVERGYKIKGSISSHFHSDSTGGIEWLNSRSIPTYASELTNELLKKDGKVQATNSFSGVNYWLVKNKIEVFYPGPGHTPDNVVVWLPERKILFGGCFIKPYGLGNLGDANIEAWPKSAKLLKSKYGKAKLVVPSHSEVGDASLLKLTLEQAVKGLNESKKPSKPSN	ORF_OK	TRUE_HIT	kklrkllllllllllllslaaaeekeeeekdelkiekladnvyvhtsykevegvgkvssngLvvidekevvlvDtpwteeqtekLldwiekklklkvkavistHfHeDrlGGlealnkkgiktyasalTnellkkegkeqakhsfkkeekltlgkekievfypGegHtkDNiVvwlpkekiLfGGClvksaeakslGnlgdAnveeWpksvekvkakypeakiVipGHgevgdkellehTlkllekak	KSMSKLSVFFIFLFCSIATA------AESLPDLKIEKLDEGVYVHTSFEEVNGWGVVPKHGLVVLVNAEAYLIDTPFTAKDTEKLVTWFVE-RGYKIKGSISSHFHSDSTGGIEWLNSRSIPTYASELTNELLKKDGKVQATNSFSGVNY-WLVKNKIEVFYPGPGHTPDNVVVWLPERKILFGGCFIKP---YGLGNLGDANIEAWPKSAKLLKSKYGKAKLVVPSHSEVGDASLLKLTLEQAVKGL	3	250	97.6285	0	11	0	246	Cluster_663	subclass_B1_metallo-beta-lactamase_IMP-37_NG_049201.1_cds_WP_063860593.1_1	Cluster_672	SP_Sec_SPI_	18-19	SP_Sec_SPI_	18-19	H_x_H_x_D	H_x_x_D_N	C	H	.
B1_240	GCF_003013475.1	2126350	2126350	Brevibacillus_porteri	Bacteria-Terrabacteria_group-Bacillota-Bacilli-Bacillales-Paenibacillaceae-Brevibacillus-	6462020	NZ_PXZO01000064.1	class_B1	260.2	+	70682	71393	70596	71432	TTGAAGATTCATAAAGGATGGATAGGGAAAGCTGTATGTAGTTTGTTCCTGACAGTCGCCGTTGCTCTGACACCGTTTTCTCATCAAACGATTGCCCAATCTGAAACAGCATCTCCCACTCAGATTACCAATCCAGGGAAAAGCATTGTGTTATCAAAATTAAATGACAAATTATGGTTACATACAACCTATAATGAATGGAATGGCACAACCTATGACCACAATGGCTTAATCGTTTCTACGTCCAATGGGATCGTCCTGATTGATACAGCATGGGGGGACACCCAAAAAACGGAAGAGCTATTACAGCTGATTAAGAAGCATTGGAAGAAAGACGTTGTGTTGGCGCTGATTACACATGCACATGATGACAGCATTTCAGGTATCCGTGCGTTACTC…	WP_106836412.1	subclass_B1_metallo-beta-lactamase	MKIHKGWIGKAVCSLFLTVAVALTPFSHQTIAQSETASPTQITNPGKSIVLSKLNDKLWLHTTYNEWNGTTYDHNGLIVSTSNGIVLIDTAWGDTQKTEELLQLIKKHWKKDVVLALITHAHDDSISGIRALLHQKIDVRSTRLTAKLAKEYGYPSPNPTLDEKPVIKVGDTILEAYYPGEGHSSDNITVWLPQSKILFGGCFVKALDAKDLGNLSDANVEQWDDSVQKVIEKYPQVETVVPGHGNTGGKNLLDHTIELIKQHSQKQAAKTNSFSRST	ORF_OK	TRUE_HIT	a.........eekeeeekdelkiekladnvyvhtsykevegvgkvssngLvvidekevvlvDtpwteeq.tekLldwiekklklkvkavistHfHeDrlGGlealnkkgiktyasalTnellkkegkeqakhsfkkeekltlgkekievfypGegHtkDNiVvwlpkekiLfGGClvksaeakslGnlgdAnveeWpksvekvkakypeakiVipGHgevgdkellehTlkllekakkk	QtiaqsetasPTQITNPGKSIVLSKLNDKLWLHTTYNEWNGT-TYDHNGLIVSTSNGIVLIDTAWGDTQkTEELLQLIKKHWKKDVVLALITHAHDDSISGIRALLHQKIDVRSTRLTAKLAKEYGYPSPNPTLDEKPVIKVGDTILEAYYPGEGHSSDNITVWLPQSKILFGGCFVKALDAKDLGNLSDANVEQWDDSVQKVIEKYPQVETVVPGHGNTGGKNLLDHTIELIKQHSQK	24	252	90.1186	10	1	0	278	Cluster_78	CLUSTER_NOT_IN_NCBI_AMR_REF_DB	Cluster_78	SP_Sec_SPI_	32-33	SP_Sec_SPI_	32-33	H_x_H_x_D	H_x_x_D_N	C	H	.
B1_241	GCF_003014495.1	1541063	1541063	Prolixibacter_denitrificans	Bacteria-FCB_group-Bacteroidota_Chlorobiota_group-Bacteroidota-Bacteroidia-Marinilabiliales-Prolixibacteraceae-Prolixibacter-	4727966	NZ_PYGC01000003.1	class_B1	247.9	-	98741	99476	98736	99479	ATGAAAAAGTGGTTGGTGATTTCCCTGATGGTCTTTTTACAGGGACAAGTATGGGCGCAGCAAATTGCGCAGCGGCTAAAAGTGTCCGATGACATTGTGTTGGTCAAACTGTCCGAGCGGGCATATGTACATATTTCACAGGCAGAGATTCCACCGTTTGGACGAGTTTCTTCCAACGGATTGATATTTGTTAACGGAAAGGAGGCATTTCTGTTTGACACACCGGTAACCGAAGAAGAGACCCGGACGTTGGTCGATTGGCTCAAAAGTTCGATGGAGGTCGAAGTCGTCGGTTTTGTTCCCAACCACTGGCATATTGACTGCATGGGGGGACTAGCTTATTTGCAACAGCAGCATATTCCGTCGTGGGCGAACCAGATAACCGTCGACAGCGCGAAA…	WP_170108888.1	subclass_B1_metallo-beta-lactamase	MKKWLVISLMVFLQGQVWAQQIAQRLKVSDDIVLVKLSERAYVHISQAEIPPFGRVSSNGLIFVNGKEAFLFDTPVTEEETRTLVDWLKSSMEVEVVGFVPNHWHIDCMGGLAYLQQQHIPSWANQITVDSAKVKGLPVPDHRFTDSLQLKLGDKTIECYYLGPAHATDNIVVWIPSEKILFPGCLVKSMNSRTLGNTGDGDLKAYPATIIKVIDKFTDARIVIPGHGPFGGPELLRHTYRLAESNQ	ORF_OK	TRUE_HIT	lrkllllllllllllslaaa.eekeeeekdelkiekladnvyvhtsykevegvgkvssngLvvidekevvlvDtpwteeqtekLldwiekklklkvkavistHfHeDrlGGlealnkkgiktyasalTnellkkegkeqakhsfkkeekltlgkekievfypGegHtkDNiVvwlpkekiLfGGClvksaeakslGnlgdAnveeWpksvekvkakypeakiVipGHgevgdkellehTlklleka	MKKWLVISLMVFLQGQVWAQqIAQRLKVSDDIVLVKLSERAYVHISQAEIPPFGRVSSNGLIFVNGKEAFLFDTPVTEEETRTLVDWLKSSMEVEVVGFVPNHWHIDCMGGLAYLQQQHIPSWANQITVDSAKVKGLPVPDHRFTDSLQLKLGDKTIECYYLGPAHATDNIVVWIPSEKILFPGCLVKSMNSRTLGNTGDGDLKAYPATIIKVIDKFTDARIVIPGHGPFGGPELLRHTYRLAESN	5	249	96.4427	1	0	0	247	Cluster_681	CLUSTER_NOT_IN_NCBI_AMR_REF_DB	Cluster_691	SP_Sec_SPI_	19-20	SP_Sec_SPI_	19-20	H_x_H_x_D	H_x_x_D_N	C	H	.
B1_242	GCF_003014535.1	1434707	1434707	Taibaiella_chishuiensis	Bacteria-FCB_group-Bacteroidota_Chlorobiota_group-Bacteroidota-Chitinophagia-Chitinophagales-Chitinophagaceae-Taibaiella-	5841105	NZ_PYGD01000001.1	class_B1	257.5	+	593365	594070	593339	594100	ATGCCCACGAGGATGATAAAAACAATGGCCTTATTGCTCGGTATAAGCGCCACTACCCTGGCTTCGGCTACAGAAAACAAGCCGGCCCTGGAGATCAAACAGCTTACCGGCGATTTCTACATCTTTACCACCTACCAGGTTTATAACAACCAACCCGTGCCTGCCAATGGTATGTATGTGGTTACGGATAAAGGTGTGGTGATGCTCGACGGCGCCTGGGATCCTACGCAGAACCAACCCCTGCTTGATAGTATCGAAGCCCGCCACCATAAAAAAGTGGTGCTGGAAATAGGTACGCACTACCACAGCGATCGCAGCGGCGCTTTCGACTTTTTGCGGAAAAAAGGGGTGAAAACTTATTCCTCGCTGAAGACACTCGAATTGTGCAAAGAATTTAAA…	WP_219905898.1	BlaB_IND_MUS_family_subclass_B1_metallo-beta-lactamase	MPTRMIKTMALLLGISATTLASATENKPALEIKQLTGDFYIFTTYQVYNNQPVPANGMYVVTDKGVVMLDGAWDPTQNQPLLDSIEARHHKKVVLEIGTHYHSDRSGAFDFLRKKGVKTYSSLKTLELCKEFKEHEAEFYFTKDTTFHVGKLEFETYYAGPGHTKDNIVIWFPKAKVLYGGCLIKSADATDLGNVQDANLKQWPETLKKLQQRFPEPAYIIPGHGDWSSRRALIHTLELLQRDKRNRNETGKK	ORF_OK	TRUE_HIT	lllllllllllslaaaeekeeeekdelkiekladnvyvhtsykevegvgkvssngLvvidekevvlvDtpwteeqtekLldwiekklklkvkavistHfHeDrlGGlealnkkgiktyasalTnellkkegkeqakhsfkkeekltlgkekievfypGegHtkDNiVvwlpkekiLfGGClvksaeakslGnlgdAnveeWpksvekvkakypeakiVipGHgevgdkellehTlkllekak	MAL-LLGISATTL----ASATENKPALEIKQLTGDFYIFTTYQVYNNQ-PVPANGMYVVTDKGVVMLDGAWDPTQNQPLLDSIEARHHKKVVLEIGTHYHSDRSGAFDFLRKKGVKTYSSLKTLELCKEFKEHEAEFYFTKDTTFHVGKLEFETYYAGPGHTKDNIVIWFPKAKVLYGGCLIKSADATDLGNVQDANLKQWPETLKKLQQRFPEPAYIIPGHGDWSSRRALIHTLELLQRDK	9	250	95.2569	0	6	0	253	Cluster_374	CLUSTER_NOT_IN_NCBI_AMR_REF_DB	Cluster_383	SP_Sec_SPI_	23-24	SP_Sec_SPI_	23-24	H_x_H_x_D	H_x_x_D_N	C	H	.
B1_243	GCF_003014535.1	1434707	1434707	Taibaiella_chishuiensis	Bacteria-FCB_group-Bacteroidota_Chlorobiota_group-Bacteroidota-Chitinophagia-Chitinophagales-Chitinophagaceae-Taibaiella-	5841105	NZ_PYGD01000008.1	class_B1	260	-	135774	136509	135769	136527	ATGAATATCATCCTGAAAACCCTGCTGGTCCTGTTATGCGCTTCGACCGTCGTGGATTGCAGCGCCCGGAAAAAAGATAAATTCAAAGCCGAAGTAGTGTACAAGTCCCGTTACCTGGTCATATCGAAGGTTTCGGCGCATGCTTTCGAACATACCTCTTACCTGCAAACGCAGGACTATGGCAAGGTGCCTTGCAATGGTCTGGTGGTGATCCATAACCAGGAGGCCATTGTTTTCGACACGCCTACCGATGATACCGGCTCCCTGGAGTTGATCAACTGGATCACGAAAAAGCAGCATGCTAAGGTGAATGCGGTGATCCCGACCCATTTCCATAACGATTGCCTGGGTGGGCTCAAAGCGTTCGACGATCACCATATTCCTTCGTATGCCTATATC…	WP_106524265.1	subclass_B1_metallo-beta-lactamase	MNIILKTLLVLLCASTVVDCSARKKDKFKAEVVYKSRYLVISKVSAHAFEHTSYLQTQDYGKVPCNGLVVIHNQEAIVFDTPTDDTGSLELINWITKKQHAKVNAVIPTHFHNDCLGGLKAFDDHHIPSYAYIKTIELAKANHYVVPQNGFSDSLALTVGGERITAKFFGEGHTRDNVVGYFPAEHVMFGGCLVKELDATKGYLGDANVADWSGTVERVKKAYPDVKIIIPGHGDYGNQALLDYTINLFRKP	ORF_OK	TRUE_HIT	kllllllllllllslaaa.....eekeeeekdelkiekladnvyvhtsykevegvgkvssngLvvidekevvlvDtpwteeqtekLldwiekklklkvkavistHfHeDrlGGlealnkkgiktyasalTnellkkegkeqakhsfkkeekltlgkekievfypGegHtkDNiVvwlpkekiLfGGClvksaeakslGnlgdAnveeWpksvekvkakypeakiVipGHgevgdkellehTlkllek	KTLLVLLCASTVVDCSARkkdkfKAEVVYKSRYLVISKVSAHAFEHTSYLQTQDYGKVPCNGLVVIHNQEAIVFDTPTDDTGSLELINWITKKQHAKVNAVIPTHFHNDCLGGLKAFDDHHIPSYAYIKTIELAKANHYVVPQNGFSDSLALTVGGERITAKFFGEGHTRDNVVGYFPAEHVMFGGCLVKELDA-TKGYLGDANVADWSGTVERVKKAYPDVKIIIPGHGDYGNQALLDYTINLFRK	7	248	95.2569	5	1	0	252	Cluster_402	CLUSTER_NOT_IN_NCBI_AMR_REF_DB	Cluster_411	LIPO_Sec_SPII_	19-20	LIPO_Sec_SPII_	19-20	H_x_H_x_D	H_x_x_D_N	C	H	.
B1_244	GCF_003014695.1	1591085	1591085	Dyadobacter_jiangsuensis	Bacteria-FCB_group-Bacteroidota_Chlorobiota_group-Bacteroidota-Cytophagia-Cytophagales-Spirosomataceae-Dyadobacter-	8265804	NZ_PYAS01000017.1	class_B1	277.6	+	55797	56529	55801	56535	ATGAAAAAACACATTCTCGCCTGCCTGCTCCCACTCCTATTTACCCTCACACGCGCGCAAACGCCCGACAAGAGTTTTAAAAGCGACGACCTTGAAATTCAGAAAATTAGCGACCACACCTATTCACACCTCACCTATCTCCAGACAGAAACTTTCGGAAAAGTACCGTGCAACGGCCTGATCGTTTTCGACGGAAATGAAGCGGTGATTTTCGATACGCCTGTGGATGACGCCACGTCAGAAAAAGTCATCCGATGGATCGAAGACAGCTTAAAATGCAAGGTAAAGGCCGTTATAGCCACGCATTTCCACGAGGATTGCGTTGGCGGTTTGAAGGCGTTCCATGAGCACGGCATTCCCTCATATGCGACCAACAAGACAATTGCTTTCGATAAAGAA…	WP_106598813.1	subclass_B1_metallo-beta-lactamase	MKKHILACLLPLLFTLTRAQTPDKSFKSDDLEIQKISDHTYSHLTYLQTETFGKVPCNGLIVFDGNEAVIFDTPVDDATSEKVIRWIEDSLKCKVKAVIATHFHEDCVGGLKAFHEHGIPSYATNKTIAFDKEHKFPVPQKGFDDKLDLKVGKKTVMAAFYGEGHTRDNIIGYFPSEKVMFGGCLIKEVDASKGNLADANVEAWPATVSKIKAKYPDVKVVIPGHGKIGDTALLDYTIKLFSQK	ORF_OK	TRUE_HIT	kklrkllllllllllllslaaaeekeeeekdelkiekladnvyvhtsykevegvgkvssngLvvidekevvlvDtpwteeqtekLldwiekklklkvkavistHfHeDrlGGlealnkkgiktyasalTnellkkegkeqakhsfkkeekltlgkekievfypGegHtkDNiVvwlpkekiLfGGClvksaeakslGnlgdAnveeWpksvekvkakypeakiVipGHgevgdkellehTlkllek	QPMKKHILACLLPLLFTLTRAQTPDKSFKSDDLEIQKISDHTYSHLTYLQTETFGKVPCNGLIVFDGNEAVIFDTPVDDATSEKVIRWIEDSLKCKVKAVIATHFHEDCVGGLKAFHEHGIPSYATNKTIAFDKEHKFPVPQKGFDDKLDLKVGKKTVMAAFYGEGHTRDNIIGYFPSEKVMFGGCLIKEVDA-SKGNLADANVEAWPATVSKIKAKYPDVKVVIPGHGKIGDTALLDYTIKLFSQ	3	248	96.8379	0	1	0	244	Cluster_844	CLUSTER_NOT_IN_NCBI_AMR_REF_DB	Cluster_847	SP_Sec_SPI_	19-20	SP_Sec_SPI_	19-20	H_x_H_x_D	H_x_x_D_N	C	H	.
B1_245	GCF_003014755.1	536980	536980	Chitinophaga_niastensis	Bacteria-FCB_group-Bacteroidota_Chlorobiota_group-Bacteroidota-Chitinophagia-Chitinophagales-Chitinophagaceae-Chitinophaga-	7326416	NZ_PYAW01000002.1	class_B1	260.2	-	1551382	1552081	1551380	1552096	ATGAAGTTAATAATATCACTTTTTTTCTCGTTGATCCTGTCATCAACACTGTTCGCACAAGACAGCACCTTCAGGATTTCAACCACCCATCTGACTGGTAATTTTTATGTGTATACTTCCTATGGGAAGTACGCCAACACTATATTTCCGGCCAACGGGCTTTACGTTGTTACCGACAGCGGCATTGTAATTATTGATACTCCCTGGAGCGAAGCACAAACGCAACAATTAATAGATACACTCACACAACAATATCATCAAAAAATTGTGCTCGCCATTGCAACACACTTTCATGATGACAGAACTATCGGATTGGACGTGTTTAAAAAAAATGGCATAAAAACCTATACCAGCAAGCTAACCGCGGATTTGTGCAAAGCCGGAGGTTACAAACAACCC…	WP_106528754.1	BlaB_IND_MUS_family_subclass_B1_metallo-beta-lactamase	MKLIISLFFSLILSSTLFAQDSTFRISTTHLTGNFYVYTSYGKYANTIFPANGLYVVTDSGIVIIDTPWSEAQTQQLIDTLTQQYHQKIVLAIATHFHDDRTIGLDVFKKNGIKTYTSKLTADLCKAGGYKQPEFTFDKDTTFTVGKLRIQTYYPGEGHTKDNLLIWFPKDQILYGGCFIKSLEAKTIGFTGDSNLAQWPASLHNVATRFKHTRYIIPGHQGWQGNAEMITHTLELLK	ORF_OK	TRUE_HIT	llllllllllslaaaeekeeeekdelkiekladnvyvhtsykevegvgkvssngLvvidekevvlvDtpwteeqtekLldwiekklklkvkavistHfHeDrlGGlealnkkgiktyasalTnellkkegkeqakhsfkkeekltlgkekievfypGegHtkDNiVvwlpkekiLfGGClvksaeakslGnlgdAnveeWpksvekvkakypeakiVipGHgevgd.kellehTlklle	ISLFFSLILSST----LFAQDSTFRISTTHLTGNFYVYTSYGKYANT-IFPANGLYVVTDSGIVIIDTPWSEAQTQQLIDTLTQQYHQKIVLAIATHFHDDRTIGLDVFKKNGIKTYTSKLTADLCKAGGYKQPEFTFDKDTTFTVGKLRIQTYYPGEGHTKDNLLIWFPKDQILYGGCFIKSLEAKTIGFTGDSNLAQWPASLHNVATRFKHTRYIIPGHQGWQGnAEMITHTLELLK	10	247	93.6759	1	5	0	238	Cluster_1111	CLUSTER_NOT_IN_NCBI_AMR_REF_DB	Cluster_1095	SP_Sec_SPI_	19-20	SP_Sec_SPI_	19-20	H_x_H_x_D	H_x_x_D_N	C	H	.
B1_246	GCF_003014895.1	172045	172045	Elizabethkingia_miricola	Bacteria-FCB_group-Bacteroidota_Chlorobiota_group-Bacteroidota-Flavobacteriia-Flavobacteriales-Weeksellaceae-Elizabethkingia-	4212088	NZ_PYAO01000012.1	class_B1	284.9	+	48558	49269	48538	49287	ATGATGAAAAGATTAAAAGGATTATTGGTTCTGGCTTTAGGTTTTACAGGACTACAGGTTTTTGGACAGGAGAATCCTGATGTTAAAATTGAGAAACTAAAAGATAATCTGTATGTTTATACAACCTATAATTCCTATAAAGGAGTAAAGTATGCAGCTAATGCTGTATATATAGTAACGGATAAAGGAGTTGTAGTTATAGATTGCCCATGGGGAGAGGAGAAATTTAAAAGCTTTACGGACGAGATTTATAAAAAGCACGGAAAGAAAGTCATTATGAATATTGCTACTCATTCTCATGATGACCGTGCCGGAGGCTTGGGATATTTCAAAAAAATAGGTGCAAAAACTTATTCTACTAAAATGACAGATTCTATCTTAGCGAAAGAGAATAAGCCA…	WP_086980232.1	subclass_B1_metallo-beta-lactamase_BlaB-16	MMKRLKGLLVLALGFTGLQVFGQENPDVKIEKLKDNLYVYTTYNSYKGVKYAANAVYIVTDKGVVVIDCPWGEEKFKSFTDEIYKKHGKKVIMNIATHSHDDRAGGLGYFKKIGAKTYSTKMTDSILAKENKPRAEYTFDNNKSFKVGKSEFQVYYPGKGHTADNVVVWFPKEKVLVGGCIIKSADSKDLGFIGEAYVNDWTQSVYNIQQKFSGAQYIVAGHDDWKDQRSIKHTLDLISEYQQKQKASN	ORF_OK	TRUE_HIT	llllllllllslaaaeekeeeekdelkiekladnvyvhtsykevegvgkvssngLvvidekevvlvDtpwteeqtekLldwiekklklkvkavistHfHeDrlGGlealnkkgiktyasalTnellkkegkeqakhsfkkeekltlgkekievfypGegHtkDNiVvwlpkekiLfGGClvksaeakslGnlgdAnveeWpksvekvkakypeakiVipGHgevgdkellehTlkllekakkk	GLLVLALGFTGL----QVFGQENPDVKIEKLKDNLYVYTTYNSYKGV-KYAANAVYIVTDKGVVVIDCPWGEEKFKSFTDEIYKKHGKKVIMNIATHSHDDRAGGLGYFKKIGAKTYSTKMTDSILAKENKPRAEYTFDNNKSFKVGKSEFQVYYPGKGHTADNVVVWFPKEKVLVGGCIIKSADSKDLGFIGEAYVNDWTQSVYNIQQKFSGAQYIVAGHDDWKDQRSIKHTLDLISEYQQK	10	252	95.6522	0	5	0	249	Cluster_590	BlaB_family_subclass_B1_metallo-beta-lactamase_NG_047491.1_cds_WP_063842622.1_1	Cluster_593	SP_Sec_SPI_	22-23	SP_Sec_SPI_	22-23	H_x_H_x_D	H_x_x_D_N	C	H	.
B1_247	GCF_003020585.1	2116499	2116499	Chryseobacterium_aurantiacum	Bacteria-FCB_group-Bacteroidota_Chlorobiota_group-Bacteroidota-Flavobacteriia-Flavobacteriales-Weeksellaceae-Chryseobacterium_group-Chryseobacterium-	4615988	NZ_PXUE01000005.1	class_B1	276.6	+	27014	27725	27012	27731	ATGAAAAAAAGCATTCCATTTTTAATTGCTTCTATGTTGCTGAGCCCGCTTGCAAATGCTCAGGTAAGAGATTTTGTGATTGAACCTCCCATTCAGCCCAACTTTTATATTTACAAAACTTTCGGAGTATTCGGAGGTAAGGAATATTCTACCAATGCTGTTTATCTGGTAACTAAAAAAGGAGTTGTTTTATTTGATGTTCCATGGCAGAAAACACAATACCAAAGCCTTCTTGATACAATTCAACAACGACATAACCTTCCTGTAATTGCGGTATTTGCTACTCATTCACACGAAGACAGAGCCGGAGATTTAAGCTTTTATAACAATAAAGGAATTAAAACCTATGCAACGGCAAAAACCAATGAATTACTAAAGAAAGACGGAAAAGCTACCTCT…	WP_106917476.1	IND_family_subclass_B1_metallo-beta-lactamase	MKKSIPFLIASMLLSPLANAQVRDFVIEPPIQPNFYIYKTFGVFGGKEYSTNAVYLVTKKGVVLFDVPWQKTQYQSLLDTIQQRHNLPVIAVFATHSHEDRAGDLSFYNNKGIKTYATAKTNELLKKDGKATSTEIIKTGKPYHIGGEEFTVDFLGEGHTADNVVVWFPKYKILDGGCLVKSKAAVDLGYTGEANVAQWPQTMAKLKSKYAQATLVIPGHDEWKGGGHVEHTLDLLNKK	ORF_OK	TRUE_HIT	lrkllllllllllllslaaaeekeeeekdelkiekladnvyvhtsykevegvgkvssngLvvidekevvlvDtpwteeqtekLldwiekklklkvkavistHfHeDrlGGlealnkkgiktyasalTnellkkegkeqakhsfkkeekltlgkekievfypGegHtkDNiVvwlpkekiLfGGClvksaeakslGnlgdAnveeWpksvekvkakypeakiVipGHgevgdkellehTlkllek	MKKSIPFL-IASMLLSPL----ANAQVRDFVIEPPIQPNFYIYKTFGVFGGK-EYSTNAVYLVTKKGVVLFDVPWQKTQYQSLLDTIQQRHNLPVIAVFATHSHEDRAGDLSFYNNKGIKTYATAKTNELLKKDGKATSTEIIKTGKPYHIGGEEFTVDFLGEGHTADNVVVWFPKYKILDGGCLVKSKAAVDLGYTGEANVAQWPQTMAKLKSKYAQATLVIPGHDEWKGGGHVEHTLDLLNK	5	248	96.0474	0	6	0	239	Cluster_751	IND_family_subclass_B1_metallo-beta-lactamase_CGB-1_NG_051689.1_cds_WP_002979282.1_1	Cluster_755	SP_Sec_SPI_	20-21	SP_Sec_SPI_	20-21	H_x_H_x_D	H_x_x_D_N	C	H	.
B1_248	GCF_003020585.1	2116499	2116499	Chryseobacterium_aurantiacum	Bacteria-FCB_group-Bacteroidota_Chlorobiota_group-Bacteroidota-Flavobacteriia-Flavobacteriales-Weeksellaceae-Chryseobacterium_group-Chryseobacterium-	4615988	NZ_PXUE01000001.1	class_B1	275.1	-	254375	255104	254367	255152	ATGATATCTATAAAAAATCACAAGCCAGCACTATTCACCATTAAGCATATATTTATCATTTTATTTTCGTTCATTATTTTCAGTTGCAGCTCTCAGCATTCTGATAAATTTAAGGCTAAGGAAATTTACAAATCTGACAATTTAATTATTACTCAAATTTCTGAAAACTCGTTTGTCCATACCTCTTTTAAACAGACCAATGACTTCGGAAATGTCCCCTGCAATGGTCTCATCGTCACAAGCAAGCAGGAAGCAATCGTTTTTGACACTCCAACAAATGACAAAGATTCAGAAGAACTGATCCAATGGATCACCGGAACGCTCCATTCTAAGATCAACGCTGTTATTCCAACTCATTTTCATGACGACAGCATGGGCGGGTTGCAGGTATTTCATAAT…	WP_106914583.1	CHM_family_subclass_B1_metallo-beta-lactamase	MISIKNHKPALFTIKHIFIILFSFIIFSCSSQHSDKFKAKEIYKSDNLIITQISENSFVHTSFKQTNDFGNVPCNGLIVTSKQEAIVFDTPTNDKDSEELIQWITGTLHSKINAVIPTHFHDDSMGGLQVFHNHNIPSYSYSKTIELGKKNNFVVSKNSFNDFITLKVGNEEVVAKFFGEGHTRDNTVGYFPSENILFGGCLLKELEASKGYLGDANVSTWSNTVEKVKKEYPNVKIVIPGHGEYGDKKLLDYTIKLFKVQ	ORF_OK	TRUE_HIT	llllllllllllslaaa.....eekeeeekdelkiekladnvyvhtsykevegvgkvssngLvvidekevvlvDtpwteeqtekLldwiekklklkvkavistHfHeDrlGGlealnkkgiktyasalTnellkkegkeqakhsfkkeekltlgkekievfypGegHtkDNiVvwlpkekiLfGGClvksaeakslGnlgdAnveeWpksvekvkakypeakiVipGHgevgdkellehTlklle	HIFIILFSFIIFSCSSQhsdkfKAKEIYKSDNLIITQISENSFVHTSFKQTNDFGNVPCNGLIVTSKQEAIVFDTPTNDKDSEELIQWITGTLHSKINAVIPTHFHDDSMGGLQVFHNHNIPSYSYSKTIELGKKNNFVVSKNSFNDFITLKVGNEEVVAKFFGEGHTRDNTVGYFPSENILFGGCLLKELEA-SKGYLGDANVSTWSNTVEKVKKEYPNVKIVIPGHGEYGDKKLLDYTIKLFK	8	247	94.4664	5	1	0	261	Cluster_257	CLUSTER_NOT_IN_NCBI_AMR_REF_DB	Cluster_261	LIPO_Sec_SPII_	28-29	LIPO_Sec_SPII_	28-29	H_x_H_x_D	H_x_x_D_N	C	H	.
B1_249	GCF_003020845.1	1396	1396	Bacillus_cereus	Bacteria-Terrabacteria_group-Bacillota-Bacilli-Bacillales-Bacillaceae-Bacillus-Bacillus_cereus_group-	5361178	NZ_CP020383.1	class_B1	273.3	-	3273361	3274060	3273359	3274132	ATGAAAAAGAATACGTTGTTAAAAGTAGGATTATGTGTAGGTTTACTAGGAACAATTCAATTTGTTAGCACAATTTCTTCTGTACAAGCATCACAAAAGGTAGAGAAAACAGTAATAAAAAATGAGACGGGAGCCATTTCAATATCTCAGTTAAACAAGAATGTATGGGTTCATACGGAGTTAGGTTATTTTAATGGAGAAGCAGTTCCTTCGAACGGTCTAGTTCTTAATACTGCTAAAGGACTAGTGCTTGTTGATTCTTCTTGGGATGACAAATTAACGAAGGAACTAATAGAAATGGTAGAAAAGAAATTTCAGAAGCGCGTAACGGATGTCATTATTACACATGCGCACGCCGATCGAATTGGCGGAATAAAAACGTTGAAAGAAAGAGGAATT…	WP_046392920.1	BcII_family_subclass_B1_metallo-beta-lactamase	MKKNTLLKVGLCVGLLGTIQFVSTISSVQASQKVEKTVIKNETGAISISQLNKNVWVHTELGYFNGEAVPSNGLVLNTAKGLVLVDSSWDDKLTKELIEMVEKKFQKRVTDVIITHAHADRIGGIKTLKERGIKAHSTALTAELAKKSGYEEPLGDLQTVTNLKFGNTKVETFYPGKGHTEDNIVVWLPQYQILAGGCLVKSAEAKDLGNVADAYVNEWSTSIENVLKRYGNINSVVPGHGEVGGKGLLLHTLDLLK	ORF_OK	TRUE_HIT	lllslaaa........eekeeeekdelkiekladnvyvhtsykevegvgkvssngLvvidekevvlvDtpwteeqtekLldwiekklklkvkavistHfHeDrlGGlealnkkgiktyasalTnellkkegkeqakhsfkkeekltlgkekievfypGegHtkDNiVvwlpkekiLfGGClvksaeakslGnlgdAnveeWpksvekvkakypeakiVipGHgevgdkellehTlklle	TIS----SvqasqkveKTVIKNETGAISISQLNKNVWVHTELGYFNGE-AVPSNGLVLNTAKGLVLVDSSWDDKLTKELIEMVEKKFQKRVTDVIITHAHADRIGGIKTLKERGIKAHSTALTAELAKKSGYEEPLGDLQTVTNLKFGNTKVETFYPGKGHTEDNIVVWLPQYQILAGGCLVKSAEAKDLGNVADAYVNEWSTSIENVLKRYGNINSVVPGHGEVGGKGLLLHTLDLLK	17	247	90.9091	8	5	0	257	Cluster_137	BcII_family_subclass_B1_metallo-beta-lactamase_NG_047224.1_cds_WP_012261328.1_1	Cluster_139	SP_Sec_SPI_	30-31	SP_Sec_SPI_	30-31	H_x_H_x_D	H_x_x_D_N	C	H	.
B1_25	GCF_002850625.1	299766	158836	Enterobacter_hormaechei_subsp_steigerwaltii	Bacteria-Pseudomonadota-Gammaproteobacteria-Enterobacterales-Enterobacteriaceae-Enterobacter-Enterobacter_cloacae_complex-	5363131	NZ_PDVT01000062.1	class_B1	273.2	-	4295	5063	4287	5099	ATGGAATTGCCCAATATTATGCACCCGGTCGCGAAGCTGAGCACCGCATTAGCCGCTGCATTGATGCTGAGCGGGTGCATGCCCGGTGAAATCCGCCCGACGATTGGCCAGCAAATGGAAACTGGCGACCAACGGTTTGGCGATCTGGTTTTCCGCCAGCTCGCACCGAATGTCTGGCAGCACACTTCCTATCTCGACATGCCGGGTTTCGGGGCAGTCGCTTCCAACGGTTTGATCGTCAGGGATGGCGGCCGCGTGCTGGTGGTCGATACCGCCTGGACCGATGACCAGACCGCCCAGATCCTCAACTGGATCAAGCAGGAGATCAACCTGCCGGTCGCGCTGGCGGTGGTGACTCACGCGCATCAGGACAAGATGGGCGGTATGGACGCGCTGCAT…	WP_004201164.1	subclass_B1_metallo-beta-lactamase_NDM-1	MELPNIMHPVAKLSTALAAALMLSGCMPGEIRPTIGQQMETGDQRFGDLVFRQLAPNVWQHTSYLDMPGFGAVASNGLIVRDGGRVLVVDTAWTDDQTAQILNWIKQEINLPVALAVVTHAHQDKMGGMDALHAAGIATYANALSNQLAPQEGMVAAQHSLTFAANGWVEPATAPNFGPLKVFYPGPGHTSDNITVGIDGTDIAFGGCLIKDSKAKSLGNLGDADTEHYAASARAFGAAFPKASMIVMSHSAPDSRAAITHTARMADKLR	ORF_OK	TRUE_HIT	kllllllllllllslaaa.........eekeeeekdelkiekladnvyvhtsykevegvgkvssngLvvidekevvlvDtpwteeqtekLldwiekklklkvkavistHfHeDrlGGlealnkkgiktyasalTnellkkegkeqakhsfkkeek......ltlgkekievfypGegHtkDNiVvwlpkekiLfGGClvksaeakslGnlgdAnveeWpksvekvkakypeakiVipGHgevgdkellehTlkllek	KLSTALAAALMLSGCMPGeirptigqqMETGDQRFGDLVFRQLAPNVWQHTSYLDMPGFGAVASNGLIVRDGGRVLVVDTAWTDDQTAQILNWIKQEINLPVALAVVTHAHQDKMGGMDALHAAGIATYANALSNQLAPQEGMVAAQHSLTFAANgwvepaTAPNFGPLKVFYPGPGHTSDNITVGIDGTDIAFGGCLIKDSKAKSLGNLGDADTEHYAASARAFGAAFPKASMIVMSHSAPDSRAAITHTARMADK	7	248	95.2569	15	0	0	270	Cluster_118	subclass_B1_metallo-beta-lactamase_NDM-18_NG_052866.1_cds_WP_077064890.1_1	Cluster_120	LIPO_Sec_SPII_	25-26	LIPO_Sec_SPII_	25-26	H_x_H_x_D	H_x_x_D_N	C	H	.
B1_250	GCF_003023845.1	2072846	2072846	Adhaeribacter_arboris	Bacteria-FCB_group-Bacteroidota_Chlorobiota_group-Bacteroidota-Cytophagia-Cytophagales-Hymenobacteraceae-Adhaeribacter-	7248201	NZ_PYFT01000001.1	class_B1	259	+	4232588	4233314	4232580	4233323	ATGAAAAAATACCAACTGCTTTTCCTTTTTAGTTTTTTAATCTTTGGATTCATCTCCGCCCAAACAAGCCAAAACAACCCAAACAGCAAAACGGAATCGCTTACCATTCAAAAAATTAGCAATCACGTTTACCAGCACACTTCGTTTCTGCAAACCGAAAGCTTTGGTAAAGTTCCGTGCAATGGCATGATTGTTTTTGATAAAACCGAAGCCATTATTTTTGACACTCCCCCCGATAATAAAACCTCTTTAGAATTAATTACTTGGGTAAAAAATAAACTGCATTGTAAAATTAAAGCCATTATTCCCACTCATTTCCATTCCGATTGTTTAGGTGGCTTAGAGGAGTTTCACAAACATAGCATTCCTTCTTACGCGAATAATGAAACCATTGCTATT…	WP_106931321.1	subclass_B1_metallo-beta-lactamase	MKKYQLLFLFSFLIFGFISAQTSQNNPNSKTESLTIQKISNHVYQHTSFLQTESFGKVPCNGMIVFDKTEAIIFDTPPDNKTSLELITWVKNKLHCKIKAIIPTHFHSDCLGGLEEFHKHSIPSYANNETIAIAKSKNIIVPQNGFNDLLELKVGDKKVLVEYFGPGHTQDNVVGYFPDEKIMFGGCLIKELGAGKGNLEDANTMAWPITVTKLKEKYPNTAFIIPGHGKSGGTELLDYTIKLFAPK	ORF_OK	TRUE_HIT	klrkllllllllllllslaaaeekeeeekdelkiekladnvyvhtsykevegvgkvssngLvvidekevvlvDtpwteeqtekLldwiekklklkvkavistHfHeDrlGGlealnkkgiktyasalTnellkkegkeqakhsfkkeekltlgkekievfypGegHtkDNiVvwlpkekiLfGGClvksaeakslGnlgdAnveeWpksvekvkakypeakiVipGHgevgdkellehTlklle	KYQLLFLFSFLIFGFISAQTSQNNPNSKTESLTIQKISNHVYQHTSFLQTESFGKVPCNGMIVFDKTEAIIFDTPPDNKTSLELITWVKNKLHCKIKAIIPTHFHSDCLGGLEEFHKHSIPSYANNETIAIAKSKNIIVPQNGFNDLLELKVGDKKVLVEYFGPGHTQDNVVGYFPDEKIMFGGCLIKELGA-GKGNLEDANTMAWPITVTKLKEKYPNTAFIIPGHGKSGGTELLDYTIKLFA	4	247	96.0474	0	1	0	247	Cluster_682	CLUSTER_NOT_IN_NCBI_AMR_REF_DB	Cluster_692	LIPO_Sec_SPII_	20-21	LIPO_Sec_SPII_	20-21	H_x_H_x_D	H_x_x_D_N	C	H	.
B1_251	GCF_003024515.2	2136183	2136183	Acinetobacter_sichuanensis	Bacteria-Pseudomonadota-Gammaproteobacteria-Moraxellales-Moraxellaceae-Acinetobacter-	4666610	NZ_PYIX02000133.1	class_B1	275.5	+	19	784	1	793	GCACCCGGTCGCGAAGCTGAGCACCGCATTAGCCGCTGCATTGATGCTGAGCGGGTGCATGCCCGGTGAAATCCGCCCGACGATTGGCCAGCAAATGGAAACTGGCGACCAACGGTTTGGCGATCTGGTTTTCCGCCAGCTCGCACCGAATGTCTGGCAGCACACTTCCTATCTCGACATGCCGGGTTTCGGGGCAGTCGCTTCCAACGGTTTGATCGTCAGGGATGGCGGCCGCGTGCTGGTGGTCGATACCGCCTGGACCGATGACCAGACCGCCCAGATCCTCAACTGGATCAAGCAGGAGATCAACCTGCCGGTCGCGCTGGCGGTGGTGACTCACGCGCATCAGGACAAGATGGGCGGTATGGACGCGCTGCATGCGGCGGGGATTGCGACTTA…	WP_206450020.1	NDM_family_subclass_B1_metallo-beta-lactamase_partial	HPVAKLSTALAAALMLSGCMPGEIRPTIGQQMETGDQRFGDLVFRQLAPNVWQHTSYLDMPGFGAVASNGLIVRDGGRVLVVDTAWTDDQTAQILNWIKQEINLPVALAVVTHAHQDKMGGMDALHAAGIATYANALSNQLAPQEGMVAAQHSLTFAANGWVEPATAPNFGPLKVFYPGPGHTSDNITVGIDGTDIAFGGCLIKDSKAKSLGNLGDADTEHYAASARAFGAAFPKASMIVMSHSAPDSRAAITHTARMADKLR	ORF_OK	TRUE_HIT	llllllllllllslaaa.........eekeeeekdelkiekladnvyvhtsykevegvgkvssngLvvidekevvlvDtpwteeqtekLldwiekklklkvkavistHfHeDrlGGlealnkkgiktyasalTnellkkegkeqakhsfkkeek......ltlgkekievfypGegHtkDNiVvwlpkekiLfGGClvksaeakslGnlgdAnveeWpksvekvkakypeakiVipGHgevgdkellehTlkllek	LSTALAAALMLSGCMPGeirptigqqMETGDQRFGDLVFRQLAPNVWQHTSYLDMPGFGAVASNGLIVRDGGRVLVVDTAWTDDQTAQILNWIKQEINLPVALAVVTHAHQDKMGGMDALHAAGIATYANALSNQLAPQEGMVAAQHSLTFAANgwvepaTAPNFGPLKVFYPGPGHTSDNITVGIDGTDIAFGGCLIKDSKAKSLGNLGDADTEHYAASARAFGAAFPKASMIVMSHSAPDSRAAITHTARMADK	8	248	94.8617	15	0	0	263	Cluster_118	subclass_B1_metallo-beta-lactamase_NDM-18_NG_052866.1_cds_WP_077064890.1_1	Cluster_120	LIPO_Sec_SPII_	18-19	LIPO_Sec_SPII_	18-19	H_x_H_x_D	H_x_x_D_N	C	H	.
B1_252	GCF_003024525.3	2136182	2136182	Acinetobacter_cumulans	Bacteria-Pseudomonadota-Gammaproteobacteria-Moraxellales-Moraxellaceae-Acinetobacter-	3710871	NZ_CP035935.1	class_B1	269.4	+	33786	34554	33751	34563	ATGGAATTGCCCAATATTATGCACCCGGTCGCGAAGCTGAGCACCGCATTAGCCGCTGCATTGATGCTGAGCGGGTGCATGCCCGGTGAAATCCGCCCGACGATTGGCCAGCAAATGGAAACTGGCGACCAACGGTTTGGCGATCTGGTTTTCCGCCAGCTCGCACCGAATGTCTGGCAGCACACTTCCTATCTCGACATGCCGGGTTTCGGGGCAGTCGCTTCCAACGGTTTGATCGTCAGGGATGGCGGCCGCGTGCTGGTGGTCGATACCGCCTGGACCGATGACCAGACCGCCCAGATCCTCAACTGGATCAAGCAGGAGATCAACCTGCCGGTCGCGCTGGCGGTGGTGACTCACGCGCATCAGGACAAGATGGGCGGTATGGACGCGCTGCAT…	WP_004201164.1	subclass_B1_metallo-beta-lactamase_NDM-1	MELPNIMHPVAKLSTALAAALMLSGCMPGEIRPTIGQQMETGDQRFGDLVFRQLAPNVWQHTSYLDMPGFGAVASNGLIVRDGGRVLVVDTAWTDDQTAQILNWIKQEINLPVALAVVTHAHQDKMGGMDALHAAGIATYANALSNQLAPQEGMVAAQHSLTFAANGWVEPATAPNFGPLKVFYPGPGHTSDNITVGIDGTDIAFGGCLIKDSKAKSLGNLGDADTEHYAASARAFGAAFPKASMIVMSHSAPDSRAAITHTARMADKLR	ORF_OK	TRUE_HIT	kllllllllllllslaaa.........eekeeeekdelkiekladnvyvhtsykevegvgkvssngLvvidekevvlvDtpwteeqtekLldwiekklklkvkavistHfHeDrlGGlealnkkgiktyasalTnellkkegkeqakhsfkkeek......ltlgkekievfypGegHtkDNiVvwlpkekiLfGGClvksaeakslGnlgdAnveeWpksvekvkakypeakiVipGHgevgdkellehTlkllek	KLSTALAAALMLSGCMPGeirptigqqMETGDQRFGDLVFRQLAPNVWQHTSYLDMPGFGAVASNGLIVRDGGRVLVVDTAWTDDQTAQILNWIKQEINLPVALAVVTHAHQDKMGGMDALHAAGIATYANALSNQLAPQEGMVAAQHSLTFAANgwvepaTAPNFGPLKVFYPGPGHTSDNITVGIDGTDIAFGGCLIKDSKAKSLGNLGDADTEHYAASARAFGAAFPKASMIVMSHSAPDSRAAITHTARMADK	7	248	95.2569	15	0	0	270	Cluster_118	subclass_B1_metallo-beta-lactamase_NDM-18_NG_052866.1_cds_WP_077064890.1_1	Cluster_120	LIPO_Sec_SPII_	25-26	LIPO_Sec_SPII_	25-26	H_x_H_x_D	H_x_x_D_N	C	H	.
B1_253	GCF_003026285.1	74109	74109	Photobacterium_profundum	Bacteria-Pseudomonadota-Gammaproteobacteria-Vibrionales-Vibrionaceae-Photobacterium-	6116719	NZ_PYOD01000003.1	class_B1	257.5	-	461409	462150	461398	462153	ATGAACAAATTAATATTATCTCTTCTCTTCGTTTTTAGCCTTACTTCTTTACCTTCATTTGCTGAAAATAACAACAGTAAACTTGATATAACATTAGTGACAGACAACGTATATCTCGTAAAGTCGTATAGAATATTAAAGCCTCTTGATCCGCTAGAACAATCAATAACTATGGACGCTAATTCGATTATCTATGTTGATGGTAAAGACGCCTATTATATTGATACGCCATGGAATGCTACTGATATGCCTGAACTTATGGCTTGGTTAGATGATCATGAATTGATTCTTAAAAAAACGGTATTCACCCACTTTCATGAAGATCAAACGGGCGGTCTTAACTATTTACTCGATCATAAATTTGAAACGTATGCATCCCAAAAAACGAATCAGTTACTA…	WP_006229611.1	subclass_B1_metallo-beta-lactamase	MNKLILSLLFVFSLTSLPSFAENNNSKLDITLVTDNVYLVKSYRILKPLDPLEQSITMDANSIIYVDGKDAYYIDTPWNATDMPELMAWLDDHELILKKTVFTHFHEDQTGGLNYLLDHKFETYASQKTNQLLIKEGKSAANNEFTVGSFEFLKDKIEVYYPGAGHTSDNLVVWLPKENVLIGGCLLRASEIKNIGWIGDADTEQWTQSVQKVQGKFPNVKFVIPGHGAVGGNHSIITHTIKVVNEFNTKK	ORF_OK	TRUE_HIT	lrkllllllllllllslaaaeekeeeekdelkiekladnvyvhtsykevegv......gkvssngLvvidekevvlvDtpwteeqtekLldwiekklklkvkavistHfHeDrlGGlealnkkgiktyasalTnellkkegkeqakhsfkkeekltlgkekievfypGegHtkDNiVvwlpkekiLfGGClvksaeakslGnlgdAnveeWpksvekvkakypeakiVipGHgevgd.kellehTlkllekak	MNKLILSLLFVFSLTSLP---SFAENNNSKLDITLVTDNVYLVKSYRILKPLdpleqsITMDANSIIYVDGKDAYYIDTPWNATDMPELMAWLDD-HELILKKTVFTHFHEDQTGGLNYLLDHKFETYASQKTNQLLIKEGKSAANNEFTVGSF-EFLKDKIEVYYPGAGHTSDNLVVWLPKENVLIGGCLLRASEIKNIGWIGDADTEQWTQSVQKVQGKFPNVKFVIPGHGAVGGnHSIITHTIKVVNEFN	5	250	96.8379	7	5	0	251	Cluster_468	CLUSTER_NOT_IN_NCBI_AMR_REF_DB	Cluster_478	SP_Sec_SPI_	21-22	SP_Sec_SPI_	21-22	H_x_H_x_D	H_x_x_D_N	C	H	.
B1_254	GCF_003030105.1	28901	28901	Salmonella_enterica	Bacteria-Pseudomonadota-Gammaproteobacteria-Enterobacterales-Enterobacteriaceae-Salmonella-	5123279	NZ_CP028171.1	class_B1	273.7	-	3141	3909	3133	3945	ATGGAATTGCCCAATATTATGCACCCGGTCGCGAAGCTGAGCACCGCATTAGCCGCTGCATTGATGCTGAGCGGGTGCATGCCCGGTGAAATCCGCCCGACGATTGGCCAGCAAATGGAAACTGGCGACCAACGGTTTGGCGATCTGGTTTTCCGCCAGCTCGCACCGAATGTCTGGCAGCACACTTCCTATCTCGACATGCCGGGTTTCGGGGCAGTCGCTTCCAACGGTTTGATCGTCAGGGATGGCGGCCGCGTGCTGGTGGTCGATACCGCCTGGACCGATGACCAGACCGCCCAGATCCTCAACTGGATCAAGCAGGAGATCAACCTGCCGGTCGCGCTGGCGGTGGTGACTCACGCGCATCAGGACAAGATGGGCGGTATGGACGCGCTGCAT…	WP_004201164.1	subclass_B1_metallo-beta-lactamase_NDM-1	MELPNIMHPVAKLSTALAAALMLSGCMPGEIRPTIGQQMETGDQRFGDLVFRQLAPNVWQHTSYLDMPGFGAVASNGLIVRDGGRVLVVDTAWTDDQTAQILNWIKQEINLPVALAVVTHAHQDKMGGMDALHAAGIATYANALSNQLAPQEGMVAAQHSLTFAANGWVEPATAPNFGPLKVFYPGPGHTSDNITVGIDGTDIAFGGCLIKDSKAKSLGNLGDADTEHYAASARAFGAAFPKASMIVMSHSAPDSRAAITHTARMADKLR	ORF_OK	TRUE_HIT	kllllllllllllslaaa.........eekeeeekdelkiekladnvyvhtsykevegvgkvssngLvvidekevvlvDtpwteeqtekLldwiekklklkvkavistHfHeDrlGGlealnkkgiktyasalTnellkkegkeqakhsfkkeek......ltlgkekievfypGegHtkDNiVvwlpkekiLfGGClvksaeakslGnlgdAnveeWpksvekvkakypeakiVipGHgevgdkellehTlkllek	KLSTALAAALMLSGCMPGeirptigqqMETGDQRFGDLVFRQLAPNVWQHTSYLDMPGFGAVASNGLIVRDGGRVLVVDTAWTDDQTAQILNWIKQEINLPVALAVVTHAHQDKMGGMDALHAAGIATYANALSNQLAPQEGMVAAQHSLTFAANgwvepaTAPNFGPLKVFYPGPGHTSDNITVGIDGTDIAFGGCLIKDSKAKSLGNLGDADTEHYAASARAFGAAFPKASMIVMSHSAPDSRAAITHTARMADK	7	248	95.2569	15	0	0	270	Cluster_118	subclass_B1_metallo-beta-lactamase_NDM-18_NG_052866.1_cds_WP_077064890.1_1	Cluster_120	LIPO_Sec_SPII_	25-26	LIPO_Sec_SPII_	25-26	H_x_H_x_D	H_x_x_D_N	C	H	.
B1_255	GCF_003030145.1	573	573	Klebsiella_pneumoniae	Bacteria-Pseudomonadota-Gammaproteobacteria-Enterobacterales-Enterobacteriaceae-Klebsiella_Raoultella_group-Klebsiella-	5535332	NZ_CP028178.1	class_B1	268.4	+	33453	34221	33418	34230	ATGGAATTGCCCAATATTATGCACCCGGTCGCGAAGCTGAGCACCGCATTAGCCGCTGCATTGATGCTGAGCGGGTGCATGCCCGGTGAAATCCGCCCGACGATTGGCCAGCAAATGGAAACTGGCGACCAACGGTTTGGCGATCTGGTTTTCCGCCAGCTCGCACCGAATGTCTGGCAGCACACTTCCTATCTCGACATGCCGGGTTTCGGGGCAGTCGCTTCCAACGGTTTGATCGTCAGGGATGGCGGCCGCGTGCTGGTGGTCGATACCGCCTGGACCGATGACCAGACCGCCCAGATCCTCAACTGGATCAAGCAGGAGATCAACCTGCCGGTCGCGCTGGCGGTGGTGACTCACGCGCATCAGGACAAGATGGGCGGTATGGACGCGCTGCAT…	WP_004201164.1	subclass_B1_metallo-beta-lactamase_NDM-1	MELPNIMHPVAKLSTALAAALMLSGCMPGEIRPTIGQQMETGDQRFGDLVFRQLAPNVWQHTSYLDMPGFGAVASNGLIVRDGGRVLVVDTAWTDDQTAQILNWIKQEINLPVALAVVTHAHQDKMGGMDALHAAGIATYANALSNQLAPQEGMVAAQHSLTFAANGWVEPATAPNFGPLKVFYPGPGHTSDNITVGIDGTDIAFGGCLIKDSKAKSLGNLGDADTEHYAASARAFGAAFPKASMIVMSHSAPDSRAAITHTARMADKLR	ORF_OK	TRUE_HIT	kllllllllllllslaaa.........eekeeeekdelkiekladnvyvhtsykevegvgkvssngLvvidekevvlvDtpwteeqtekLldwiekklklkvkavistHfHeDrlGGlealnkkgiktyasalTnellkkegkeqakhsfkkeek......ltlgkekievfypGegHtkDNiVvwlpkekiLfGGClvksaeakslGnlgdAnveeWpksvekvkakypeakiVipGHgevgdkellehTlkllek	KLSTALAAALMLSGCMPGeirptigqqMETGDQRFGDLVFRQLAPNVWQHTSYLDMPGFGAVASNGLIVRDGGRVLVVDTAWTDDQTAQILNWIKQEINLPVALAVVTHAHQDKMGGMDALHAAGIATYANALSNQLAPQEGMVAAQHSLTFAANgwvepaTAPNFGPLKVFYPGPGHTSDNITVGIDGTDIAFGGCLIKDSKAKSLGNLGDADTEHYAASARAFGAAFPKASMIVMSHSAPDSRAAITHTARMADK	7	248	95.2569	15	0	0	270	Cluster_118	subclass_B1_metallo-beta-lactamase_NDM-18_NG_052866.1_cds_WP_077064890.1_1	Cluster_120	LIPO_Sec_SPII_	25-26	LIPO_Sec_SPII_	25-26	H_x_H_x_D	H_x_x_D_N	C	H	.
B1_256	GCF_003030365.1	562	562	Escherichia_coli	Bacteria-Pseudomonadota-Gammaproteobacteria-Enterobacterales-Enterobacteriaceae-Escherichia-	5063082	NZ_CP027703.1	class_B1	267.3	+	67980	68748	67945	68757	ATGGAATTGCCCAATATTATGCACCCGGTCGCGAAGCTGAGCACCGCATTAGCCGCTGCATTGATGCTGAGCGGGTGCATGCCCGGTGAAATCCGCCCGACGATTGGCCAGCAAATGGAAACTGGCGACCAACGGTTTGGCGATCTGGTTTTCCGCCAGCTCGCACCGAATGTCTGGCAGCACACTTCCTATCTCGACATGCCGGGTTTCGGGGCAGTCGCTTCCAACGGTTTGATCGTCAGGGATGGCGGCCGCGTGCTGTTGGTCGATACCGCCTGGACCGATGACCAGACCGCCCAGATCCTCAACTGGATCAAGCAGGAGATCAACCTGCCGGTCGCGCTGGCGGTGGTGACTCACGCGCATCAGGACAAGATGGGCGGTATGGACGCGCTGCAT…	WP_023408309.1	subclass_B1_metallo-beta-lactamase_NDM-5	MELPNIMHPVAKLSTALAAALMLSGCMPGEIRPTIGQQMETGDQRFGDLVFRQLAPNVWQHTSYLDMPGFGAVASNGLIVRDGGRVLLVDTAWTDDQTAQILNWIKQEINLPVALAVVTHAHQDKMGGMDALHAAGIATYANALSNQLAPQEGLVAAQHSLTFAANGWVEPATAPNFGPLKVFYPGPGHTSDNITVGIDGTDIAFGGCLIKDSKAKSLGNLGDADTEHYAASARAFGAAFPKASMIVMSHSAPDSRAAITHTARMADKLR	ORF_OK	TRUE_HIT	kllllllllllllslaaa.........eekeeeekdelkiekladnvyvhtsykevegvgkvssngLvvidekevvlvDtpwteeqtekLldwiekklklkvkavistHfHeDrlGGlealnkkgiktyasalTnellkkegkeqakhsfkkeek......ltlgkekievfypGegHtkDNiVvwlpkekiLfGGClvksaeakslGnlgdAnveeWpksvekvkakypeakiVipGHgevgdkellehTlkllek	KLSTALAAALMLSGCMPGeirptigqqMETGDQRFGDLVFRQLAPNVWQHTSYLDMPGFGAVASNGLIVRDGGRVLLVDTAWTDDQTAQILNWIKQEINLPVALAVVTHAHQDKMGGMDALHAAGIATYANALSNQLAPQEGLVAAQHSLTFAANgwvepaTAPNFGPLKVFYPGPGHTSDNITVGIDGTDIAFGGCLIKDSKAKSLGNLGDADTEHYAASARAFGAAFPKASMIVMSHSAPDSRAAITHTARMADK	7	248	95.2569	15	0	0	270	Cluster_118	subclass_B1_metallo-beta-lactamase_NDM-18_NG_052866.1_cds_WP_077064890.1_1	Cluster_120	LIPO_Sec_SPII_	25-26	LIPO_Sec_SPII_	25-26	H_x_H_x_D	H_x_x_D_N	C	H	.
B1_257	GCF_003030885.1	1890302	1890302	Bacillus_wiedmannii	Bacteria-Terrabacteria_group-Bacillota-Bacilli-Bacillales-Bacillaceae-Bacillus-Bacillus_cereus_group-	5544000	NZ_PYWP01000006.1	class_B1	280.2	+	331167	331881	331111	331884	ATGAAAAAGAATACATTATTAAAATTAGGGGTATGTGTTAGTTTACTAGGAATAACTCAATTTGTTAGTACAGTTTCTTCTGTACAAGCGGAACAAAAGCTAGAGCAAAAAGTAATAAAAAATGAGGCAGGAACTATTTCAATTTCTCAGTTAAACAAAAATGTATGGGTTCATACGGAGTTAGGTTATTTTAACGGAGAAGCAGTTCCTTCGAACGGGCTAGTTCTTACTACTTCTAAAGGATTAGTACTTGTCGATTCTTCTTGGGATGATAAGTTAACGAAGGAATTAATAGAGATGGTAGAAAAGAAATTTAAGAAGCGCGTAACAGATGTCATTATTACACATGCACACGCTGATCGTATTGGCGGAATTAAAACATTGAAAGAAAGAGGCATT…	WP_048543790.1	BcII_family_subclass_B1_metallo-beta-lactamase	MKKNTLLKLGVCVSLLGITQFVSTVSSVQAEQKLEQKVIKNEAGTISISQLNKNVWVHTELGYFNGEAVPSNGLVLTTSKGLVLVDSSWDDKLTKELIEMVEKKFKKRVTDVIITHAHADRIGGIKTLKERGIKAHSTALTAELAKKSGYEEPLGDLQTITNLKFGNMKVETFYPGKGHTEDNIVVWLPQYNILAGGCLVKSAEAKDLGNVADAYVNEWSASIENVLKRYGNINSVVPGHGEVGDKGLLLHTLDLLK	ORF_OK	TRUE_HIT	llllslaaa........eekeeeekdelkiekladnvyvhtsykevegvgkvssngLvvidekevvlvDtpwteeqtekLldwiekklklkvkavistHfHeDrlGGlealnkkgiktyasalTnellkkegkeqakhsfkkeekltlgkekievfypGegHtkDNiVvwlpkekiLfGGClvksaeakslGnlgdAnveeWpksvekvkakypeakiVipGHgevgdkellehTlklle	TQFVSTVSSvqaeqkleQKVIKNEAGTISISQLNKNVWVHTELGYFNGE-AVPSNGLVLTTSKGLVLVDSSWDDKLTKELIEMVEKKFKKRVTDVIITHAHADRIGGIKTLKERGIKAHSTALTAELAKKSGYEEPLGDLQTITNLKFGNMKVETFYPGKGHTEDNIVVWLPQYNILAGGCLVKSAEAKDLGNVADAYVNEWSASIENVLKRYGNINSVVPGHGEVGDKGLLLHTLDLLK	16	247	91.3043	8	1	0	257	Cluster_137	BcII_family_subclass_B1_metallo-beta-lactamase_NG_047224.1_cds_WP_012261328.1_1	Cluster_139	SP_Sec_SPI_	30-31	SP_Sec_SPI_	30-31	H_x_H_x_D	H_x_x_D_N	C	H	.
B1_258	GCF_003031325.1	573	573	Klebsiella_pneumoniae	Bacteria-Pseudomonadota-Gammaproteobacteria-Enterobacterales-Enterobacteriaceae-Klebsiella_Raoultella_group-Klebsiella-	5947820	NZ_CP024879.1	class_B1	269.8	+	21936	22704	21901	22713	ATGGAATTGCCCAATATTATGCACCCGGTCGCGAAGCTGAGCACCGCATTAGCCGCTGCATTGATGCTGAGCGGGTGCATGCCCGGTGAAATCCGCCCGACGATTGGCCAGCAAATGGAAACTGGCGACCAACGGTTTGGCGATCTGGTTTTCCGCCAGCTCGCACCGAATGTCTGGCAGCACACTTCCTATCTCGACATGCCGGGTTTCGGGGCAGTCGCTTCCAACGGTTTGATCGTCAGGGATGGCGGCCGCGTGCTGGTGGTCGATACCGCCTGGACCGATGACCAGACCGCCCAGATCCTCAACTGGATCAAGCAGGAGATCAACCTGCCGGTCGCGCTGGCGGTGGTGACTCACGCGCATCAGGACAAGATGGGCGGTATGGACGCGCTGCAT…	WP_004201164.1	subclass_B1_metallo-beta-lactamase_NDM-1	MELPNIMHPVAKLSTALAAALMLSGCMPGEIRPTIGQQMETGDQRFGDLVFRQLAPNVWQHTSYLDMPGFGAVASNGLIVRDGGRVLVVDTAWTDDQTAQILNWIKQEINLPVALAVVTHAHQDKMGGMDALHAAGIATYANALSNQLAPQEGMVAAQHSLTFAANGWVEPATAPNFGPLKVFYPGPGHTSDNITVGIDGTDIAFGGCLIKDSKAKSLGNLGDADTEHYAASARAFGAAFPKASMIVMSHSAPDSRAAITHTARMADKLR	ORF_OK	TRUE_HIT	kllllllllllllslaaa.........eekeeeekdelkiekladnvyvhtsykevegvgkvssngLvvidekevvlvDtpwteeqtekLldwiekklklkvkavistHfHeDrlGGlealnkkgiktyasalTnellkkegkeqakhsfkkeek......ltlgkekievfypGegHtkDNiVvwlpkekiLfGGClvksaeakslGnlgdAnveeWpksvekvkakypeakiVipGHgevgdkellehTlkllek	KLSTALAAALMLSGCMPGeirptigqqMETGDQRFGDLVFRQLAPNVWQHTSYLDMPGFGAVASNGLIVRDGGRVLVVDTAWTDDQTAQILNWIKQEINLPVALAVVTHAHQDKMGGMDALHAAGIATYANALSNQLAPQEGMVAAQHSLTFAANgwvepaTAPNFGPLKVFYPGPGHTSDNITVGIDGTDIAFGGCLIKDSKAKSLGNLGDADTEHYAASARAFGAAFPKASMIVMSHSAPDSRAAITHTARMADK	7	248	95.2569	15	0	0	270	Cluster_118	subclass_B1_metallo-beta-lactamase_NDM-18_NG_052866.1_cds_WP_077064890.1_1	Cluster_120	LIPO_Sec_SPII_	25-26	LIPO_Sec_SPII_	25-26	H_x_H_x_D	H_x_x_D_N	C	H	.
B1_259	GCF_003031735.1	562	562	Escherichia_coli	Bacteria-Pseudomonadota-Gammaproteobacteria-Enterobacterales-Enterobacteriaceae-Escherichia-	5382571	NZ_CP020512.1	class_B1	269.3	+	958	1726	923	1735	ATGGAATTGCCCAATATTATGCACCCGGTCGCGAAGCTGAGCACCGCATTAGCCGCTGCATTGATGCTGAGCGGGTGCATGCCCGGTGAAATCCGCCCGACGATTGGCCAGCAAATGGAAACTGGCGACCAACGGTTTGGCGATCTGGTTTTCCGCCAGCTCGCACCGAATGTCTGGCAGCACACTTCCTATCTCGACATGCCGGGTTTCGGGGCAGTCGCTTCCAACGGTTTGATCGTCAGGGATGGCGGCCGCGTGCTGTTGGTCGATACCGCCTGGACCGATGACCAGACCGCCCAGATCCTCAACTGGATCAAGCAGGAGATCAACCTGCCGGTCGCGCTGGCGGTGGTGACTCACGCGCATCAGGACAAGATGGGCGGTATGGACGCGCTGCAT…	WP_023408309.1	subclass_B1_metallo-beta-lactamase_NDM-5	MELPNIMHPVAKLSTALAAALMLSGCMPGEIRPTIGQQMETGDQRFGDLVFRQLAPNVWQHTSYLDMPGFGAVASNGLIVRDGGRVLLVDTAWTDDQTAQILNWIKQEINLPVALAVVTHAHQDKMGGMDALHAAGIATYANALSNQLAPQEGLVAAQHSLTFAANGWVEPATAPNFGPLKVFYPGPGHTSDNITVGIDGTDIAFGGCLIKDSKAKSLGNLGDADTEHYAASARAFGAAFPKASMIVMSHSAPDSRAAITHTARMADKLR	ORF_OK	TRUE_HIT	kllllllllllllslaaa.........eekeeeekdelkiekladnvyvhtsykevegvgkvssngLvvidekevvlvDtpwteeqtekLldwiekklklkvkavistHfHeDrlGGlealnkkgiktyasalTnellkkegkeqakhsfkkeek......ltlgkekievfypGegHtkDNiVvwlpkekiLfGGClvksaeakslGnlgdAnveeWpksvekvkakypeakiVipGHgevgdkellehTlkllek	KLSTALAAALMLSGCMPGeirptigqqMETGDQRFGDLVFRQLAPNVWQHTSYLDMPGFGAVASNGLIVRDGGRVLLVDTAWTDDQTAQILNWIKQEINLPVALAVVTHAHQDKMGGMDALHAAGIATYANALSNQLAPQEGLVAAQHSLTFAANgwvepaTAPNFGPLKVFYPGPGHTSDNITVGIDGTDIAFGGCLIKDSKAKSLGNLGDADTEHYAASARAFGAAFPKASMIVMSHSAPDSRAAITHTARMADK	7	248	95.2569	15	0	0	270	Cluster_118	subclass_B1_metallo-beta-lactamase_NDM-18_NG_052866.1_cds_WP_077064890.1_1	Cluster_120	LIPO_Sec_SPII_	25-26	LIPO_Sec_SPII_	25-26	H_x_H_x_D	H_x_x_D_N	C	H	.
B1_26	GCF_002850675.4	562	562	Escherichia_coli	Bacteria-Pseudomonadota-Gammaproteobacteria-Enterobacterales-Enterobacteriaceae-Escherichia-	5120933	NZ_CP025948.1	class_B1	267.6	+	15729	16497	15694	16506	ATGGAATTGCCCAATATTATGCACCCGGTCGCGAAGCTGAGCACCGCATTAGCCGCTGCATTGATGCTGAGCGGGTGCATGCCCGGTGAAATCCGCCCGACGATTGGCCAGCAAATGGAAACTGGCGACCAACGGTTTGGCGATCTGGTTTTCCGCCAGCTCGCACCGAATGTCTGGCAGCACACTTCCTATCTCGACATGCCGAGTTTCGGGGCAGTCGCTTCCAACGGTTTGATCGTCAGGGATGGCGGCCGCGTGCTGTTGGTCGATACCGCCTGGACCGATGACCAGACCGCCCAGATCCTCAACTGGATCAAGCAGGAGATCAACCTGCCGGTCGCGCTGGCGGTGGTGACTCACGCGCATCAGGACAAGATGGGCGGTATGGACGCGCTGCAT…	WP_099156050.1	subclass_B1_metallo-beta-lactamase_NDM-21	MELPNIMHPVAKLSTALAAALMLSGCMPGEIRPTIGQQMETGDQRFGDLVFRQLAPNVWQHTSYLDMPSFGAVASNGLIVRDGGRVLLVDTAWTDDQTAQILNWIKQEINLPVALAVVTHAHQDKMGGMDALHAAGIATYANALSNQLAPQEGLVAAQHSLTFAANGWVEPATAPNFGPLKVFYPGPGHTSDNITVGIDGTDIAFGGCLIKDSKAKSLGNLGDADTEHYAASARAFGAAFPKASMIVMSHSAPDSRAAITHTARMADKLR	ORF_OK	TRUE_HIT	kllllllllllllslaaa.........eekeeeekdelkiekladnvyvhtsykevegvgkvssngLvvidekevvlvDtpwteeqtekLldwiekklklkvkavistHfHeDrlGGlealnkkgiktyasalTnellkkegkeqakhsfkkeek......ltlgkekievfypGegHtkDNiVvwlpkekiLfGGClvksaeakslGnlgdAnveeWpksvekvkakypeakiVipGHgevgdkellehTlkllek	KLSTALAAALMLSGCMPGeirptigqqMETGDQRFGDLVFRQLAPNVWQHTSYLDMPSFGAVASNGLIVRDGGRVLLVDTAWTDDQTAQILNWIKQEINLPVALAVVTHAHQDKMGGMDALHAAGIATYANALSNQLAPQEGLVAAQHSLTFAANgwvepaTAPNFGPLKVFYPGPGHTSDNITVGIDGTDIAFGGCLIKDSKAKSLGNLGDADTEHYAASARAFGAAFPKASMIVMSHSAPDSRAAITHTARMADK	7	248	95.2569	15	0	0	270	Cluster_118	subclass_B1_metallo-beta-lactamase_NDM-18_NG_052866.1_cds_WP_077064890.1_1	Cluster_120	LIPO_Sec_SPII_	25-26	LIPO_Sec_SPII_	25-26	H_x_H_x_D	H_x_x_D_N	C	H	.
B1_260	GCF_003031775.1	562	562	Escherichia_coli	Bacteria-Pseudomonadota-Gammaproteobacteria-Enterobacterales-Enterobacteriaceae-Escherichia-	5162167	NZ_CP020515.1	class_B1	267.4	-	137378	138146	137370	138182	ATGGAATTGCCCAATATTATGCACCCGGTCGCGAAGCTGAGCACCGCATTAGCCGCTGCATTGATGCTGAGCGGGTGCATGCCCGGTGAAATCCGCCCGACGATTGGCCAGCAAATGGAAACTGGCGACCAACGGTTTGGCGATCTGGTTTTCCGCCAGCTCGCACCGAATGTCTGGCAGCACACTTCCTATCTCGACATGCCGGGTTTCGGGGCAGTCGCTTCCAACGGTTTGATCGTCAGGGATGGCGGCCGCGTGCTGTTGGTCGATACCGCCTGGACCGATGACCAGACCGCCCAGATCCTCAACTGGATCAAGCAGGAGATCAACCTGCCGGTCGCGCTGGCGGTGGTGACTCACGCGCATCAGGACAAGATGGGCGGTATGGACGCGCTGCAT…	WP_023408309.1	subclass_B1_metallo-beta-lactamase_NDM-5	MELPNIMHPVAKLSTALAAALMLSGCMPGEIRPTIGQQMETGDQRFGDLVFRQLAPNVWQHTSYLDMPGFGAVASNGLIVRDGGRVLLVDTAWTDDQTAQILNWIKQEINLPVALAVVTHAHQDKMGGMDALHAAGIATYANALSNQLAPQEGLVAAQHSLTFAANGWVEPATAPNFGPLKVFYPGPGHTSDNITVGIDGTDIAFGGCLIKDSKAKSLGNLGDADTEHYAASARAFGAAFPKASMIVMSHSAPDSRAAITHTARMADKLR	ORF_OK	TRUE_HIT	kllllllllllllslaaa.........eekeeeekdelkiekladnvyvhtsykevegvgkvssngLvvidekevvlvDtpwteeqtekLldwiekklklkvkavistHfHeDrlGGlealnkkgiktyasalTnellkkegkeqakhsfkkeek......ltlgkekievfypGegHtkDNiVvwlpkekiLfGGClvksaeakslGnlgdAnveeWpksvekvkakypeakiVipGHgevgdkellehTlkllek	KLSTALAAALMLSGCMPGeirptigqqMETGDQRFGDLVFRQLAPNVWQHTSYLDMPGFGAVASNGLIVRDGGRVLLVDTAWTDDQTAQILNWIKQEINLPVALAVVTHAHQDKMGGMDALHAAGIATYANALSNQLAPQEGLVAAQHSLTFAANgwvepaTAPNFGPLKVFYPGPGHTSDNITVGIDGTDIAFGGCLIKDSKAKSLGNLGDADTEHYAASARAFGAAFPKASMIVMSHSAPDSRAAITHTARMADK	7	248	95.2569	15	0	0	270	Cluster_118	subclass_B1_metallo-beta-lactamase_NDM-18_NG_052866.1_cds_WP_077064890.1_1	Cluster_120	LIPO_Sec_SPII_	25-26	LIPO_Sec_SPII_	25-26	H_x_H_x_D	H_x_x_D_N	C	H	.
B1_261	GCF_003031795.1	562	562	Escherichia_coli	Bacteria-Pseudomonadota-Gammaproteobacteria-Enterobacterales-Enterobacteriaceae-Escherichia-	5440829	NZ_CP020517.1	class_B1	268	-	26281	27049	26273	27085	ATGGAATTGCCCAATATTATGCACCCGGTCGCGAAGCTGAGCACCGCATTAGCCGCTGCATTGATGCTGAGCGGGTGCATGCCCGGTGAAATCCGCCCGACGATTGGCCAGCAAATGGAAACTGGCGACCAACGGTTTGGCGATCTGGTTTTCCGCCAGCTCGCACCGAATGTCTGGCAGCACACTTCCTATCTCGACATGCCGGGTTTCGGGGCAGTCGCTTCCAACGGTTTGATCGTCAGGGATGGCGGCCGCGTGCTGTTGGTCGATACCGCCTGGACCGATGACCAGACCGCCCAGATCCTCAACTGGATCAAGCAGGAGATCAACCTGCCGGTCGCGCTGGCGGTGGTGACTCACGCGCATCAGGACAAGATGGGCGGTATGGACGCGCTGCAT…	WP_023408309.1	subclass_B1_metallo-beta-lactamase_NDM-5	MELPNIMHPVAKLSTALAAALMLSGCMPGEIRPTIGQQMETGDQRFGDLVFRQLAPNVWQHTSYLDMPGFGAVASNGLIVRDGGRVLLVDTAWTDDQTAQILNWIKQEINLPVALAVVTHAHQDKMGGMDALHAAGIATYANALSNQLAPQEGLVAAQHSLTFAANGWVEPATAPNFGPLKVFYPGPGHTSDNITVGIDGTDIAFGGCLIKDSKAKSLGNLGDADTEHYAASARAFGAAFPKASMIVMSHSAPDSRAAITHTARMADKLR	ORF_OK	TRUE_HIT	kllllllllllllslaaa.........eekeeeekdelkiekladnvyvhtsykevegvgkvssngLvvidekevvlvDtpwteeqtekLldwiekklklkvkavistHfHeDrlGGlealnkkgiktyasalTnellkkegkeqakhsfkkeek......ltlgkekievfypGegHtkDNiVvwlpkekiLfGGClvksaeakslGnlgdAnveeWpksvekvkakypeakiVipGHgevgdkellehTlkllek	KLSTALAAALMLSGCMPGeirptigqqMETGDQRFGDLVFRQLAPNVWQHTSYLDMPGFGAVASNGLIVRDGGRVLLVDTAWTDDQTAQILNWIKQEINLPVALAVVTHAHQDKMGGMDALHAAGIATYANALSNQLAPQEGLVAAQHSLTFAANgwvepaTAPNFGPLKVFYPGPGHTSDNITVGIDGTDIAFGGCLIKDSKAKSLGNLGDADTEHYAASARAFGAAFPKASMIVMSHSAPDSRAAITHTARMADK	7	248	95.2569	15	0	0	270	Cluster_118	subclass_B1_metallo-beta-lactamase_NDM-18_NG_052866.1_cds_WP_077064890.1_1	Cluster_120	LIPO_Sec_SPII_	25-26	LIPO_Sec_SPII_	25-26	H_x_H_x_D	H_x_x_D_N	C	H	.
B1_262	GCF_003031815.1	562	562	Escherichia_coli	Bacteria-Pseudomonadota-Gammaproteobacteria-Enterobacterales-Enterobacteriaceae-Escherichia-	5305742	NZ_CP020524.1	class_B1	267.5	+	52391	53159	52356	53168	ATGGAATTGCCCAATATTATGCACCCGGTCGCGAAGCTGAGCACCGCATTAGCCGCTGCATTGATGCTGAGCGGGTGCATGCCCGGTGAAATCCGCCCGACGATTGGCCAGCAAATGGAAACTGGCGACCAACGGTTTGGCGATCTGGTTTTCCGCCAGCTCGCACCGAATGTCTGGCAGCACACTTCCTATCTCGACATGCCGGGTTTCGGGGCAGTCGCTTCCAACGGTTTGATCGTCAGGGATGGCGGCCGCGTGCTGGTGGTCGATACCGCCTGGACCGATGACCAGACCGCCCAGATCCTCAACTGGATCAAGCAGGAGATCAACCTGCCGGTCGCGCTGGCGGTGGTGACTCACGCGCATCAGGACAAGATGGGCGGTATGGACGCGCTGCAT…	WP_004201164.1	subclass_B1_metallo-beta-lactamase_NDM-1	MELPNIMHPVAKLSTALAAALMLSGCMPGEIRPTIGQQMETGDQRFGDLVFRQLAPNVWQHTSYLDMPGFGAVASNGLIVRDGGRVLVVDTAWTDDQTAQILNWIKQEINLPVALAVVTHAHQDKMGGMDALHAAGIATYANALSNQLAPQEGMVAAQHSLTFAANGWVEPATAPNFGPLKVFYPGPGHTSDNITVGIDGTDIAFGGCLIKDSKAKSLGNLGDADTEHYAASARAFGAAFPKASMIVMSHSAPDSRAAITHTARMADKLR	ORF_OK	TRUE_HIT	kllllllllllllslaaa.........eekeeeekdelkiekladnvyvhtsykevegvgkvssngLvvidekevvlvDtpwteeqtekLldwiekklklkvkavistHfHeDrlGGlealnkkgiktyasalTnellkkegkeqakhsfkkeek......ltlgkekievfypGegHtkDNiVvwlpkekiLfGGClvksaeakslGnlgdAnveeWpksvekvkakypeakiVipGHgevgdkellehTlkllek	KLSTALAAALMLSGCMPGeirptigqqMETGDQRFGDLVFRQLAPNVWQHTSYLDMPGFGAVASNGLIVRDGGRVLVVDTAWTDDQTAQILNWIKQEINLPVALAVVTHAHQDKMGGMDALHAAGIATYANALSNQLAPQEGMVAAQHSLTFAANgwvepaTAPNFGPLKVFYPGPGHTSDNITVGIDGTDIAFGGCLIKDSKAKSLGNLGDADTEHYAASARAFGAAFPKASMIVMSHSAPDSRAAITHTARMADK	7	248	95.2569	15	0	0	270	Cluster_118	subclass_B1_metallo-beta-lactamase_NDM-18_NG_052866.1_cds_WP_077064890.1_1	Cluster_120	LIPO_Sec_SPII_	25-26	LIPO_Sec_SPII_	25-26	H_x_H_x_D	H_x_x_D_N	C	H	.
B1_263	GCF_003036445.1	573	573	Klebsiella_pneumoniae	Bacteria-Pseudomonadota-Gammaproteobacteria-Enterobacterales-Enterobacteriaceae-Klebsiella_Raoultella_group-Klebsiella-	5379737	NZ_PWAN01000024.1	class_B1	271.3	+	9491	10259	9456	10268	ATGGAATTGCCCAATATTATGCACCCGGTCGCGAAGCTGAGCACCGCATTAGCCGCTGCATTGATGCTGAGCGGGTGCATGCCCGGTGAAATCCGCCCGACGATTGGCCAGCAAATGGAAACTGGCGACCAACGGTTTGGCGATCTGGTTTTCCGCCAGCTCGCACCGAATGTCTGGCAGCACACTTCCTATCTCGACATGCCGGGTTTCGGGGCAGTCGCTTCCAACGGTTTGATCGTCAGGGATGGCGGCCGCGTGCTGTTGGTCGATACCGCCTGGACCGATGACCAGACCGCCCAGATCCTCAACTGGATCAAGCAGGAGATCAACCTGCCGGTCGCGCTGGCGGTGGTGACTCACGCGCATCAGGACAAGATGGGCGGTATGGACGCGCTGCAT…	WP_023408309.1	subclass_B1_metallo-beta-lactamase_NDM-5	MELPNIMHPVAKLSTALAAALMLSGCMPGEIRPTIGQQMETGDQRFGDLVFRQLAPNVWQHTSYLDMPGFGAVASNGLIVRDGGRVLLVDTAWTDDQTAQILNWIKQEINLPVALAVVTHAHQDKMGGMDALHAAGIATYANALSNQLAPQEGLVAAQHSLTFAANGWVEPATAPNFGPLKVFYPGPGHTSDNITVGIDGTDIAFGGCLIKDSKAKSLGNLGDADTEHYAASARAFGAAFPKASMIVMSHSAPDSRAAITHTARMADKLR	ORF_OK	TRUE_HIT	kllllllllllllslaaa.........eekeeeekdelkiekladnvyvhtsykevegvgkvssngLvvidekevvlvDtpwteeqtekLldwiekklklkvkavistHfHeDrlGGlealnkkgiktyasalTnellkkegkeqakhsfkkeek......ltlgkekievfypGegHtkDNiVvwlpkekiLfGGClvksaeakslGnlgdAnveeWpksvekvkakypeakiVipGHgevgdkellehTlkllek	KLSTALAAALMLSGCMPGeirptigqqMETGDQRFGDLVFRQLAPNVWQHTSYLDMPGFGAVASNGLIVRDGGRVLLVDTAWTDDQTAQILNWIKQEINLPVALAVVTHAHQDKMGGMDALHAAGIATYANALSNQLAPQEGLVAAQHSLTFAANgwvepaTAPNFGPLKVFYPGPGHTSDNITVGIDGTDIAFGGCLIKDSKAKSLGNLGDADTEHYAASARAFGAAFPKASMIVMSHSAPDSRAAITHTARMADK	7	248	95.2569	15	0	0	270	Cluster_118	subclass_B1_metallo-beta-lactamase_NDM-18_NG_052866.1_cds_WP_077064890.1_1	Cluster_120	LIPO_Sec_SPII_	25-26	LIPO_Sec_SPII_	25-26	H_x_H_x_D	H_x_x_D_N	C	H	.
B1_264	GCF_003036485.1	573	573	Klebsiella_pneumoniae	Bacteria-Pseudomonadota-Gammaproteobacteria-Enterobacterales-Enterobacteriaceae-Klebsiella_Raoultella_group-Klebsiella-	5855691	NZ_PWAQ01000079.1	class_B1	305.3	+	947	1655	951	1691	ATGAGCAAGTTATCTGTATTCTTTATATTTTTGTTTTGTAGCATTGCTACCGCAGCAGAGCCTTTGCCAGATTTAAAAATTGAAAAACTTGATGAAGGCGTTTATGTTCATACTTCGTTTGAAGAAGTTAACGGGTGGGGCGTTGTTCCTAAACATGGTTTGGTTGTTCTTGTAGATGCTGAAGCTTATCTAATTGACACTCCATTTACGGCTAAAGATACTGAAAAGTTAGTCACTTGGTTTGTGGAACGTGGCTATAAAATAAAAGGCAGTATTTCCTCTCATTTTCATAGTGACAGCACGGGCGGAATAGAGTGGCTTAATTCTCAATCCATCCCCACGTATGCGTCTGAATTAACTAATGAGCTGCTTAAAAAAGACGGTAAGGTTCAAGCTAAA…	WP_015060105.1	subclass_B1_metallo-beta-lactamase_IMP-4	MSKLSVFFIFLFCSIATAAEPLPDLKIEKLDEGVYVHTSFEEVNGWGVVPKHGLVVLVDAEAYLIDTPFTAKDTEKLVTWFVERGYKIKGSISSHFHSDSTGGIEWLNSQSIPTYASELTNELLKKDGKVQAKNSFGGVNYWLVKNKIEVFYPGPGHTPDNLVVWLPERKILFGGCFIKPYGLGNLGDANLEAWPKSAKLLISKYGKAKLVVPSHSEAGDASLLKLTLEQAVKGLNESKKPSKLSN	ORF_OK	TRUE_HIT	kklrkllllllllllllslaaaeekeeeekdelkiekladnvyvhtsykevegvgkvssngLvvidekevvlvDtpwteeqtekLldwiekklklkvkavistHfHeDrlGGlealnkkgiktyasalTnellkkegkeqakhsfkkeekltlgkekievfypGegHtkDNiVvwlpkekiLfGGClvksaeakslGnlgdAnveeWpksvekvkakypeakiVipGHgevgdkellehTlkllekak	ESMSKLSVFFIFLFCSIATA------AEPLPDLKIEKLDEGVYVHTSFEEVNGWGVVPKHGLVVLVDAEAYLIDTPFTAKDTEKLVTWFVE-RGYKIKGSISSHFHSDSTGGIEWLNSQSIPTYASELTNELLKKDGKVQAKNSFGGVNY-WLVKNKIEVFYPGPGHTPDNLVVWLPERKILFGGCFIKP---YGLGNLGDANLEAWPKSAKLLISKYGKAKLVVPSHSEAGDASLLKLTLEQAVKGL	3	250	97.6285	0	11	0	246	Cluster_663	subclass_B1_metallo-beta-lactamase_IMP-37_NG_049201.1_cds_WP_063860593.1_1	Cluster_672	SP_Sec_SPI_	18-19	SP_Sec_SPI_	18-19	H_x_H_x_D	H_x_x_D_N	C	H	.
B1_265	GCF_003036505.1	573	573	Klebsiella_pneumoniae	Bacteria-Pseudomonadota-Gammaproteobacteria-Enterobacterales-Enterobacteriaceae-Klebsiella_Raoultella_group-Klebsiella-	5598570	NZ_PWAS01000080.1	class_B1	304.7	+	9	717	13	753	ATGAGCAAGTTATCTGTATTCTTTATATTTTTGTTTTGTAGCATTGCTACCGCAGCAGAGCCTTTGCCAGATTTAAAAATTGAAAAACTTGATGAAGGCGTTTATGTTCATACTTCGTTTGAAGAAGTTAACGGGTGGGGCGTTGTTCCTAAACATGGTTTGGTTGTTCTTGTAGATGCTGAAGCTTATCTAATTGACACTCCATTTACGGCTAAAGATACTGAAAAGTTAGTCACTTGGTTTGTGGAACGTGGCTATAAAATAAAAGGCAGTATTTCCTCTCATTTTCATAGTGACAGCACGGGCGGAATAGAGTGGCTTAATTCTCAATCCATCCCCACGTATGCGTCTGAATTAACTAATGAGCTGCTTAAAAAAGACGGTAAGGTTCAAGCTAAA…	WP_015060105.1	subclass_B1_metallo-beta-lactamase_IMP-4	MSKLSVFFIFLFCSIATAAEPLPDLKIEKLDEGVYVHTSFEEVNGWGVVPKHGLVVLVDAEAYLIDTPFTAKDTEKLVTWFVERGYKIKGSISSHFHSDSTGGIEWLNSQSIPTYASELTNELLKKDGKVQAKNSFGGVNYWLVKNKIEVFYPGPGHTPDNLVVWLPERKILFGGCFIKPYGLGNLGDANLEAWPKSAKLLISKYGKAKLVVPSHSEAGDASLLKLTLEQAVKGLNESKKPSKLSN	ORF_OK	TRUE_HIT	kklrkllllllllllllslaaaeekeeeekdelkiekladnvyvhtsykevegvgkvssngLvvidekevvlvDtpwteeqtekLldwiekklklkvkavistHfHeDrlGGlealnkkgiktyasalTnellkkegkeqakhsfkkeekltlgkekievfypGegHtkDNiVvwlpkekiLfGGClvksaeakslGnlgdAnveeWpksvekvkakypeakiVipGHgevgdkellehTlkllekak	ESMSKLSVFFIFLFCSIATA------AEPLPDLKIEKLDEGVYVHTSFEEVNGWGVVPKHGLVVLVDAEAYLIDTPFTAKDTEKLVTWFVE-RGYKIKGSISSHFHSDSTGGIEWLNSQSIPTYASELTNELLKKDGKVQAKNSFGGVNY-WLVKNKIEVFYPGPGHTPDNLVVWLPERKILFGGCFIKP---YGLGNLGDANLEAWPKSAKLLISKYGKAKLVVPSHSEAGDASLLKLTLEQAVKGL	3	250	97.6285	0	11	0	246	Cluster_663	subclass_B1_metallo-beta-lactamase_IMP-37_NG_049201.1_cds_WP_063860593.1_1	Cluster_672	SP_Sec_SPI_	18-19	SP_Sec_SPI_	18-19	H_x_H_x_D	H_x_x_D_N	C	H	.
B1_266	GCF_003036645.2	573	573	Klebsiella_pneumoniae	Bacteria-Pseudomonadota-Gammaproteobacteria-Enterobacterales-Enterobacteriaceae-Klebsiella_Raoultella_group-Klebsiella-	5558930	NZ_CP043591.1	class_B1	269.2	+	11490	12258	11455	12267	ATGGAATTGCCCAATATTATGCACCCGGTCGCGAAGCTGAGCACCGCATTAGCCGCTGCATTGATGCTGAGCGGGTGCATGCCCGGTGAAATCCGCCCGACGATTGGCCAGCAAATGGAAACTGGCGACCAACGGTTTGGCGATCTGGTTTTCCGCCAGCTCGCACCGAATGTCTGGCAGCACACTTCCTATCTCGACATGCCGGGTTTCGGGGCAGTCGCTTCCAACGGTTTGATCGTCAGGGATGGCGGCCGCGTGCTGTTGGTCGATACCGCCTGGACCGATGACCAGACCGCCCAGATCCTCAACTGGATCAAGCAGGAGATCAACCTGCCGGTCGCGCTGGCGGTGGTGACTCACGCGCATCAGGACAAGATGGGCGGTATGGACGCGCTGCAT…	WP_023408309.1	subclass_B1_metallo-beta-lactamase_NDM-5	MELPNIMHPVAKLSTALAAALMLSGCMPGEIRPTIGQQMETGDQRFGDLVFRQLAPNVWQHTSYLDMPGFGAVASNGLIVRDGGRVLLVDTAWTDDQTAQILNWIKQEINLPVALAVVTHAHQDKMGGMDALHAAGIATYANALSNQLAPQEGLVAAQHSLTFAANGWVEPATAPNFGPLKVFYPGPGHTSDNITVGIDGTDIAFGGCLIKDSKAKSLGNLGDADTEHYAASARAFGAAFPKASMIVMSHSAPDSRAAITHTARMADKLR	ORF_OK	TRUE_HIT	kllllllllllllslaaa.........eekeeeekdelkiekladnvyvhtsykevegvgkvssngLvvidekevvlvDtpwteeqtekLldwiekklklkvkavistHfHeDrlGGlealnkkgiktyasalTnellkkegkeqakhsfkkeek......ltlgkekievfypGegHtkDNiVvwlpkekiLfGGClvksaeakslGnlgdAnveeWpksvekvkakypeakiVipGHgevgdkellehTlkllek	KLSTALAAALMLSGCMPGeirptigqqMETGDQRFGDLVFRQLAPNVWQHTSYLDMPGFGAVASNGLIVRDGGRVLLVDTAWTDDQTAQILNWIKQEINLPVALAVVTHAHQDKMGGMDALHAAGIATYANALSNQLAPQEGLVAAQHSLTFAANgwvepaTAPNFGPLKVFYPGPGHTSDNITVGIDGTDIAFGGCLIKDSKAKSLGNLGDADTEHYAASARAFGAAFPKASMIVMSHSAPDSRAAITHTARMADK	7	248	95.2569	15	0	0	270	Cluster_118	subclass_B1_metallo-beta-lactamase_NDM-18_NG_052866.1_cds_WP_077064890.1_1	Cluster_120	LIPO_Sec_SPII_	25-26	LIPO_Sec_SPII_	25-26	H_x_H_x_D	H_x_x_D_N	C	H	.
B1_267	GCF_003037165.1	72407	573	Klebsiella_pneumoniae_subsp_pneumoniae	Bacteria-Pseudomonadota-Gammaproteobacteria-Enterobacterales-Enterobacteriaceae-Klebsiella_Raoultella_group-Klebsiella-	5678800	NZ_PWAI01000003.1	class_B1	269.4	+	41718	42486	41683	42495	ATGGAATTGCCCAATATTATGCACCCGGTCGCGAAGCTGAGCACCGCATTAGCCGCTGCATTGATGCTGAGCGGGTGCATGCCCGGTGAAATCCGCCCGACGATTGGCCAGCAAATGGAAACTGGCGACCAACGGTTTGGCGATCTGGTTTTCCGCCAGCTCGCACCGAATGTCTGGCAGCACACTTCCTATCTCGACATGCCGGGTTTCGGGGCAGTCGCTTCCAACGGTTTGATCGTCAGGGATGGCGGCCGCGTGCTGGTGGTCGATACCGCCTGGACCGATGACCAGACCGCCCAGATCCTCAACTGGATCAAGCAGGAGATCAACCTGCCGGTCGCGCTGGCGGTGGTGACTCACGCGCATCAGGACAAGATGGGCGGTATGGACGCGCTGCAT…	WP_004201164.1	subclass_B1_metallo-beta-lactamase_NDM-1	MELPNIMHPVAKLSTALAAALMLSGCMPGEIRPTIGQQMETGDQRFGDLVFRQLAPNVWQHTSYLDMPGFGAVASNGLIVRDGGRVLVVDTAWTDDQTAQILNWIKQEINLPVALAVVTHAHQDKMGGMDALHAAGIATYANALSNQLAPQEGMVAAQHSLTFAANGWVEPATAPNFGPLKVFYPGPGHTSDNITVGIDGTDIAFGGCLIKDSKAKSLGNLGDADTEHYAASARAFGAAFPKASMIVMSHSAPDSRAAITHTARMADKLR	ORF_OK	TRUE_HIT	kllllllllllllslaaa.........eekeeeekdelkiekladnvyvhtsykevegvgkvssngLvvidekevvlvDtpwteeqtekLldwiekklklkvkavistHfHeDrlGGlealnkkgiktyasalTnellkkegkeqakhsfkkeek......ltlgkekievfypGegHtkDNiVvwlpkekiLfGGClvksaeakslGnlgdAnveeWpksvekvkakypeakiVipGHgevgdkellehTlkllek	KLSTALAAALMLSGCMPGeirptigqqMETGDQRFGDLVFRQLAPNVWQHTSYLDMPGFGAVASNGLIVRDGGRVLVVDTAWTDDQTAQILNWIKQEINLPVALAVVTHAHQDKMGGMDALHAAGIATYANALSNQLAPQEGMVAAQHSLTFAANgwvepaTAPNFGPLKVFYPGPGHTSDNITVGIDGTDIAFGGCLIKDSKAKSLGNLGDADTEHYAASARAFGAAFPKASMIVMSHSAPDSRAAITHTARMADK	7	248	95.2569	15	0	0	270	Cluster_118	subclass_B1_metallo-beta-lactamase_NDM-18_NG_052866.1_cds_WP_077064890.1_1	Cluster_120	LIPO_Sec_SPII_	25-26	LIPO_Sec_SPII_	25-26	H_x_H_x_D	H_x_x_D_N	C	H	.
B1_268	GCF_003037185.2	573	573	Klebsiella_pneumoniae	Bacteria-Pseudomonadota-Gammaproteobacteria-Enterobacterales-Enterobacteriaceae-Klebsiella_Raoultella_group-Klebsiella-	5859435	NZ_CP043582.1	class_B1	269.3	-	31732	32500	31724	32536	ATGGAATTGCCCAATATTATGCACCCGGTCGCGAAGCTGAGCACCGCATTAGCCGCTGCATTGATGCTGAGCGGGTGCATGCCCGGTGAAATCCGCCCGACGATTGGCCAGCAAATGGAAACTGGCGACCAACGGTTTGGCGATCTGGTTTTCCGCCAGCTCGCACCGAATGTCTGGCAGCACACTTCCTATCTCGACATGCCGGGTTTCGGGGCAGTCGCTTCCAACGGTTTGATCGTCAGGGATGGCGGCCGCGTGCTGGTGGTCGATACCGCCTGGACCGATGACCAGACCGCCCAGATCCTCAACTGGATCAAGCAGGAGATCAACCTGCCGGTCGCGCTGGCGGTGGTGACTCACGCGCATCAGGACAAGATGGGCGGTATGGACGCGCTGCAT…	WP_004201164.1	subclass_B1_metallo-beta-lactamase_NDM-1	MELPNIMHPVAKLSTALAAALMLSGCMPGEIRPTIGQQMETGDQRFGDLVFRQLAPNVWQHTSYLDMPGFGAVASNGLIVRDGGRVLVVDTAWTDDQTAQILNWIKQEINLPVALAVVTHAHQDKMGGMDALHAAGIATYANALSNQLAPQEGMVAAQHSLTFAANGWVEPATAPNFGPLKVFYPGPGHTSDNITVGIDGTDIAFGGCLIKDSKAKSLGNLGDADTEHYAASARAFGAAFPKASMIVMSHSAPDSRAAITHTARMADKLR	ORF_OK	TRUE_HIT	kllllllllllllslaaa.........eekeeeekdelkiekladnvyvhtsykevegvgkvssngLvvidekevvlvDtpwteeqtekLldwiekklklkvkavistHfHeDrlGGlealnkkgiktyasalTnellkkegkeqakhsfkkeek......ltlgkekievfypGegHtkDNiVvwlpkekiLfGGClvksaeakslGnlgdAnveeWpksvekvkakypeakiVipGHgevgdkellehTlkllek	KLSTALAAALMLSGCMPGeirptigqqMETGDQRFGDLVFRQLAPNVWQHTSYLDMPGFGAVASNGLIVRDGGRVLVVDTAWTDDQTAQILNWIKQEINLPVALAVVTHAHQDKMGGMDALHAAGIATYANALSNQLAPQEGMVAAQHSLTFAANgwvepaTAPNFGPLKVFYPGPGHTSDNITVGIDGTDIAFGGCLIKDSKAKSLGNLGDADTEHYAASARAFGAAFPKASMIVMSHSAPDSRAAITHTARMADK	7	248	95.2569	15	0	0	270	Cluster_118	subclass_B1_metallo-beta-lactamase_NDM-18_NG_052866.1_cds_WP_077064890.1_1	Cluster_120	LIPO_Sec_SPII_	25-26	LIPO_Sec_SPII_	25-26	H_x_H_x_D	H_x_x_D_N	C	H	.
B1_269	GCF_003037615.2	72407	573	Klebsiella_pneumoniae_subsp_pneumoniae	Bacteria-Pseudomonadota-Gammaproteobacteria-Enterobacterales-Enterobacteriaceae-Klebsiella_Raoultella_group-Klebsiella-	5570198	NZ_CP029386.1	class_B1	270.2	-	28783	29551	28775	29587	ATGGAATTGCCCAATATTATGCACCCGGTCGCGAAGCTGAGCACCGCATTAGCCGCTGCATTGATGCTGAGCGGGTGCATGCCCGGTGAAATCCGCCCGACGATTGGCCAGCAAATGGAAACTGGCGACCAACGGTTTGGCGATCTGGTTTTCCGCCAGCTCGCACCGAATGTCTGGCAGCACACTTCCTATCTCGACATGCCGGGTTTCGGGGCAGTCGCTTCCAACGGTTTGATCGTCAGGGATGGCGGCCGCGTGCTGGTGGTCGATACCGCCTGGACCGATGACCAGACCGCCCAGATCCTCAACTGGATCAAGCAGGAGATCAACCTGCCGGTCGCGCTGGCGGTGGTGACTCACGCGCATCAGGACAAGATGGGCGGTATGGACGCGCTGCAT…	WP_032495384.1	subclass_B1_metallo-beta-lactamase_NDM-6	MELPNIMHPVAKLSTALAAALMLSGCMPGEIRPTIGQQMETGDQRFGDLVFRQLAPNVWQHTSYLDMPGFGAVASNGLIVRDGGRVLVVDTAWTDDQTAQILNWIKQEINLPVALAVVTHAHQDKMGGMDALHAAGIATYANALSNQLAPQEGMVAAQHSLTFAANGWVEPATAPNFGPLKVFYPGPGHTSDNITVGIDGTDIAFGGCLIKDSKAKSLGNLGDADTEHYAASVRAFGAAFPKASMIVMSHSAPDSRAAITHTARMADKLR	ORF_OK	TRUE_HIT	kllllllllllllslaaa.........eekeeeekdelkiekladnvyvhtsykevegvgkvssngLvvidekevvlvDtpwteeqtekLldwiekklklkvkavistHfHeDrlGGlealnkkgiktyasalTnellkkegkeqakhsfkkeek......ltlgkekievfypGegHtkDNiVvwlpkekiLfGGClvksaeakslGnlgdAnveeWpksvekvkakypeakiVipGHgevgdkellehTlkllek	KLSTALAAALMLSGCMPGeirptigqqMETGDQRFGDLVFRQLAPNVWQHTSYLDMPGFGAVASNGLIVRDGGRVLVVDTAWTDDQTAQILNWIKQEINLPVALAVVTHAHQDKMGGMDALHAAGIATYANALSNQLAPQEGMVAAQHSLTFAANgwvepaTAPNFGPLKVFYPGPGHTSDNITVGIDGTDIAFGGCLIKDSKAKSLGNLGDADTEHYAASVRAFGAAFPKASMIVMSHSAPDSRAAITHTARMADK	7	248	95.2569	15	0	0	270	Cluster_118	subclass_B1_metallo-beta-lactamase_NDM-18_NG_052866.1_cds_WP_077064890.1_1	Cluster_120	LIPO_Sec_SPII_	25-26	LIPO_Sec_SPII_	25-26	H_x_H_x_D	H_x_x_D_N	C	H	.
B1_27	GCF_002852325.2	72407	573	Klebsiella_pneumoniae_subsp_pneumoniae	Bacteria-Pseudomonadota-Gammaproteobacteria-Enterobacterales-Enterobacteriaceae-Klebsiella_Raoultella_group-Klebsiella-	5296578	NZ_CP043589.1	class_B1	268.4	+	89696	90464	89661	90473	ATGGAATTGCCCAATATTATGCACCCGGTCGCGAAGCTGAGCACCGCATTAGCCGCTGCATTGATGCTGAGCGGGTGCATGCCCGGTGAAATCCGCCCGACGATTGGCCAGCAAATGGAAACTGGCGACCAACGGTTTGGCGATCTGGTTTTCCGCCAGCTCGCACCGAATGTCTGGCAGCACACTTCCTATCTCGACATGCCGGGTTTCGGGGCAGTCGCTTCCAACGGTTTGATCGTCAGGGATGGCGGCCGCGTGCTGGTGGTCGATACCGCCTGGACCGATGACCAGACCGCCCAGATCCTCAACTGGATCAAGCAGGAGATCAACCTGCCGGTCGCGCTGGCGGTGGTGACTCACGCGCATCAGGACAAGATGGGCGGTATGGACGCGCTGCAT…	WP_004201164.1	subclass_B1_metallo-beta-lactamase_NDM-1	MELPNIMHPVAKLSTALAAALMLSGCMPGEIRPTIGQQMETGDQRFGDLVFRQLAPNVWQHTSYLDMPGFGAVASNGLIVRDGGRVLVVDTAWTDDQTAQILNWIKQEINLPVALAVVTHAHQDKMGGMDALHAAGIATYANALSNQLAPQEGMVAAQHSLTFAANGWVEPATAPNFGPLKVFYPGPGHTSDNITVGIDGTDIAFGGCLIKDSKAKSLGNLGDADTEHYAASARAFGAAFPKASMIVMSHSAPDSRAAITHTARMADKLR	ORF_OK	TRUE_HIT	kllllllllllllslaaa.........eekeeeekdelkiekladnvyvhtsykevegvgkvssngLvvidekevvlvDtpwteeqtekLldwiekklklkvkavistHfHeDrlGGlealnkkgiktyasalTnellkkegkeqakhsfkkeek......ltlgkekievfypGegHtkDNiVvwlpkekiLfGGClvksaeakslGnlgdAnveeWpksvekvkakypeakiVipGHgevgdkellehTlkllek	KLSTALAAALMLSGCMPGeirptigqqMETGDQRFGDLVFRQLAPNVWQHTSYLDMPGFGAVASNGLIVRDGGRVLVVDTAWTDDQTAQILNWIKQEINLPVALAVVTHAHQDKMGGMDALHAAGIATYANALSNQLAPQEGMVAAQHSLTFAANgwvepaTAPNFGPLKVFYPGPGHTSDNITVGIDGTDIAFGGCLIKDSKAKSLGNLGDADTEHYAASARAFGAAFPKASMIVMSHSAPDSRAAITHTARMADK	7	248	95.2569	15	0	0	270	Cluster_118	subclass_B1_metallo-beta-lactamase_NDM-18_NG_052866.1_cds_WP_077064890.1_1	Cluster_120	LIPO_Sec_SPII_	25-26	LIPO_Sec_SPII_	25-26	H_x_H_x_D	H_x_x_D_N	C	H	.
B1_270	GCF_003037655.1	573	573	Klebsiella_pneumoniae	Bacteria-Pseudomonadota-Gammaproteobacteria-Enterobacterales-Enterobacteriaceae-Klebsiella_Raoultella_group-Klebsiella-	5549318	NZ_PWAK01000021.1	class_B1	270	-	6856	7624	6848	7660	ATGGAATTGCCCAATATTATGCACCCGGTCGCGAAGCTGAGCACCGCATTAGCCGCTGCATTGATGCTGAGCGGGTGCATGCCCGGTGAAATCCGCCCGACGATTGGCCAGCAAATGGAAACTGGCGACCAACGGTTTGGCGATCTGGTTTTCCGCCAGCTCGCACCGAATGTCTGGCAGCACACTTCCTATCTCGACATGCCGGGTTTCGGGGCAGTCGCTTCCAACGGTTTGATCGTCAGGGATGGCGGCCGCGTGCTGGTGGTCGATACCGCCTGGACCGATGACCAGACCGCCCAGATCCTCAACTGGATCAAGCAGGAGATCAACCTGCCGGTCGCGCTGGCGGTGGTGACTCACGCGCATCAGGACAAGATGGGCGGTATGGACGCGCTGCAT…	WP_004201164.1	subclass_B1_metallo-beta-lactamase_NDM-1	MELPNIMHPVAKLSTALAAALMLSGCMPGEIRPTIGQQMETGDQRFGDLVFRQLAPNVWQHTSYLDMPGFGAVASNGLIVRDGGRVLVVDTAWTDDQTAQILNWIKQEINLPVALAVVTHAHQDKMGGMDALHAAGIATYANALSNQLAPQEGMVAAQHSLTFAANGWVEPATAPNFGPLKVFYPGPGHTSDNITVGIDGTDIAFGGCLIKDSKAKSLGNLGDADTEHYAASARAFGAAFPKASMIVMSHSAPDSRAAITHTARMADKLR	ORF_OK	TRUE_HIT	kllllllllllllslaaa.........eekeeeekdelkiekladnvyvhtsykevegvgkvssngLvvidekevvlvDtpwteeqtekLldwiekklklkvkavistHfHeDrlGGlealnkkgiktyasalTnellkkegkeqakhsfkkeek......ltlgkekievfypGegHtkDNiVvwlpkekiLfGGClvksaeakslGnlgdAnveeWpksvekvkakypeakiVipGHgevgdkellehTlkllek	KLSTALAAALMLSGCMPGeirptigqqMETGDQRFGDLVFRQLAPNVWQHTSYLDMPGFGAVASNGLIVRDGGRVLVVDTAWTDDQTAQILNWIKQEINLPVALAVVTHAHQDKMGGMDALHAAGIATYANALSNQLAPQEGMVAAQHSLTFAANgwvepaTAPNFGPLKVFYPGPGHTSDNITVGIDGTDIAFGGCLIKDSKAKSLGNLGDADTEHYAASARAFGAAFPKASMIVMSHSAPDSRAAITHTARMADK	7	248	95.2569	15	0	0	270	Cluster_118	subclass_B1_metallo-beta-lactamase_NDM-18_NG_052866.1_cds_WP_077064890.1_1	Cluster_120	LIPO_Sec_SPII_	25-26	LIPO_Sec_SPII_	25-26	H_x_H_x_D	H_x_x_D_N	C	H	.
B1_271	GCF_003037665.1	573	573	Klebsiella_pneumoniae	Bacteria-Pseudomonadota-Gammaproteobacteria-Enterobacterales-Enterobacteriaceae-Klebsiella_Raoultella_group-Klebsiella-	5512974	NZ_PWAL01000021.1	class_B1	270	-	6856	7624	6848	7660	ATGGAATTGCCCAATATTATGCACCCGGTCGCGAAGCTGAGCACCGCATTAGCCGCTGCATTGATGCTGAGCGGGTGCATGCCCGGTGAAATCCGCCCGACGATTGGCCAGCAAATGGAAACTGGCGACCAACGGTTTGGCGATCTGGTTTTCCGCCAGCTCGCACCGAATGTCTGGCAGCACACTTCCTATCTCGACATGCCGGGTTTCGGGGCAGTCGCTTCCAACGGTTTGATCGTCAGGGATGGCGGCCGCGTGCTGGTGGTCGATACCGCCTGGACCGATGACCAGACCGCCCAGATCCTCAACTGGATCAAGCAGGAGATCAACCTGCCGGTCGCGCTGGCGGTGGTGACTCACGCGCATCAGGACAAGATGGGCGGTATGGACGCGCTGCAT…	WP_004201164.1	subclass_B1_metallo-beta-lactamase_NDM-1	MELPNIMHPVAKLSTALAAALMLSGCMPGEIRPTIGQQMETGDQRFGDLVFRQLAPNVWQHTSYLDMPGFGAVASNGLIVRDGGRVLVVDTAWTDDQTAQILNWIKQEINLPVALAVVTHAHQDKMGGMDALHAAGIATYANALSNQLAPQEGMVAAQHSLTFAANGWVEPATAPNFGPLKVFYPGPGHTSDNITVGIDGTDIAFGGCLIKDSKAKSLGNLGDADTEHYAASARAFGAAFPKASMIVMSHSAPDSRAAITHTARMADKLR	ORF_OK	TRUE_HIT	kllllllllllllslaaa.........eekeeeekdelkiekladnvyvhtsykevegvgkvssngLvvidekevvlvDtpwteeqtekLldwiekklklkvkavistHfHeDrlGGlealnkkgiktyasalTnellkkegkeqakhsfkkeek......ltlgkekievfypGegHtkDNiVvwlpkekiLfGGClvksaeakslGnlgdAnveeWpksvekvkakypeakiVipGHgevgdkellehTlkllek	KLSTALAAALMLSGCMPGeirptigqqMETGDQRFGDLVFRQLAPNVWQHTSYLDMPGFGAVASNGLIVRDGGRVLVVDTAWTDDQTAQILNWIKQEINLPVALAVVTHAHQDKMGGMDALHAAGIATYANALSNQLAPQEGMVAAQHSLTFAANgwvepaTAPNFGPLKVFYPGPGHTSDNITVGIDGTDIAFGGCLIKDSKAKSLGNLGDADTEHYAASARAFGAAFPKASMIVMSHSAPDSRAAITHTARMADK	7	248	95.2569	15	0	0	270	Cluster_118	subclass_B1_metallo-beta-lactamase_NDM-18_NG_052866.1_cds_WP_077064890.1_1	Cluster_120	LIPO_Sec_SPII_	25-26	LIPO_Sec_SPII_	25-26	H_x_H_x_D	H_x_x_D_N	C	H	.
B1_272	GCF_003037695.1	573	573	Klebsiella_pneumoniae	Bacteria-Pseudomonadota-Gammaproteobacteria-Enterobacterales-Enterobacteriaceae-Klebsiella_Raoultella_group-Klebsiella-	5737324	NZ_PWAR01000086.1	class_B1	304.8	+	11	716	12	752	ATGAGCAAGTTATCTGTATTCTTTATATTTTTGTTTTGTAGCATTGCTACCGCAGCAGAGCCTTTGCCAGATTTAAAAATTGAAAAACTTGATGAAGGCGTTTATGTTCATACTTCGTTTGAAGAAGTTAACGGGTGGGGCGTTGTTCCTAAACATGGTTTGGTTGTTCTTGTAGATGCTGAAGCTTATCTAATTGACACTCCATTTACGGCTAAAGATACTGAAAAGTTAGTCACTTGGTTTGTGGAACGTGGCTATAAAATAAAAGGCAGTATTTCCTCTCATTTTCATAGTGACAGCACGGGCGGAATAGAGTGGCTTAATTCTCAATCCATCCCCACGTATGCGTCTGAATTAACTAATGAGCTGCTTAAAAAAGACGGTAAGGTTCAAGCTAAA…	WP_015060105.1	subclass_B1_metallo-beta-lactamase_IMP-4	MSKLSVFFIFLFCSIATAAEPLPDLKIEKLDEGVYVHTSFEEVNGWGVVPKHGLVVLVDAEAYLIDTPFTAKDTEKLVTWFVERGYKIKGSISSHFHSDSTGGIEWLNSQSIPTYASELTNELLKKDGKVQAKNSFGGVNYWLVKNKIEVFYPGPGHTPDNLVVWLPERKILFGGCFIKPYGLGNLGDANLEAWPKSAKLLISKYGKAKLVVPSHSEAGDASLLKLTLEQAVKGLNESKKPSKLSN	ORF_OK	TRUE_HIT	klrkllllllllllllslaaaeekeeeekdelkiekladnvyvhtsykevegvgkvssngLvvidekevvlvDtpwteeqtekLldwiekklklkvkavistHfHeDrlGGlealnkkgiktyasalTnellkkegkeqakhsfkkeekltlgkekievfypGegHtkDNiVvwlpkekiLfGGClvksaeakslGnlgdAnveeWpksvekvkakypeakiVipGHgevgdkellehTlkllekak	SMSKLSVFFIFLFCSIATA------AEPLPDLKIEKLDEGVYVHTSFEEVNGWGVVPKHGLVVLVDAEAYLIDTPFTAKDTEKLVTWFVE-RGYKIKGSISSHFHSDSTGGIEWLNSQSIPTYASELTNELLKKDGKVQAKNSFGGVNY-WLVKNKIEVFYPGPGHTPDNLVVWLPERKILFGGCFIKP---YGLGNLGDANLEAWPKSAKLLISKYGKAKLVVPSHSEAGDASLLKLTLEQAVKGL	4	250	97.2332	0	11	0	246	Cluster_663	subclass_B1_metallo-beta-lactamase_IMP-37_NG_049201.1_cds_WP_063860593.1_1	Cluster_672	SP_Sec_SPI_	18-19	SP_Sec_SPI_	18-19	H_x_H_x_D	H_x_x_D_N	C	H	.
B1_273	GCF_003037715.1	573	573	Klebsiella_pneumoniae	Bacteria-Pseudomonadota-Gammaproteobacteria-Enterobacterales-Enterobacteriaceae-Klebsiella_Raoultella_group-Klebsiella-	5783480	NZ_PWAP01000086.1	class_B1	274.1	-	2195	2963	2187	2999	ATGGAATTGCCCAATATTATGCACCCGGTCGCGAAGCTGAGCACCGCATTAGCCGCTGCATTGATGCTGAGCGGGTGCATGCCCGGTGAAATCCGCCCGACGATTGGCCAGCAAATGGAAACTGGCGACCAACGGTTTGGCGATCTGGTTTTCCGCCAGCTCGCACCGAATGTCTGGCAGCACACTTCCTATCTCGACATGCCGGGTTTCGGGGCAGTCGCTTCCAACGGTTTGATCGTCAGGGATGGCGGCCGCGTGCTGTTGGTCGATACCGCCTGGACCGATGACCAGACCGCCCAGATCCTCAACTGGATCAAGCAGGAGATCAACCTGCCGGTCGCGCTGGCGGTGGTGACTCACGCGCATCAGGACAAGATGGGCGGTATGGACGCGCTGCAT…	WP_023408309.1	subclass_B1_metallo-beta-lactamase_NDM-5	MELPNIMHPVAKLSTALAAALMLSGCMPGEIRPTIGQQMETGDQRFGDLVFRQLAPNVWQHTSYLDMPGFGAVASNGLIVRDGGRVLLVDTAWTDDQTAQILNWIKQEINLPVALAVVTHAHQDKMGGMDALHAAGIATYANALSNQLAPQEGLVAAQHSLTFAANGWVEPATAPNFGPLKVFYPGPGHTSDNITVGIDGTDIAFGGCLIKDSKAKSLGNLGDADTEHYAASARAFGAAFPKASMIVMSHSAPDSRAAITHTARMADKLR	ORF_OK	TRUE_HIT	kllllllllllllslaaa.........eekeeeekdelkiekladnvyvhtsykevegvgkvssngLvvidekevvlvDtpwteeqtekLldwiekklklkvkavistHfHeDrlGGlealnkkgiktyasalTnellkkegkeqakhsfkkeek......ltlgkekievfypGegHtkDNiVvwlpkekiLfGGClvksaeakslGnlgdAnveeWpksvekvkakypeakiVipGHgevgdkellehTlkllek	KLSTALAAALMLSGCMPGeirptigqqMETGDQRFGDLVFRQLAPNVWQHTSYLDMPGFGAVASNGLIVRDGGRVLLVDTAWTDDQTAQILNWIKQEINLPVALAVVTHAHQDKMGGMDALHAAGIATYANALSNQLAPQEGLVAAQHSLTFAANgwvepaTAPNFGPLKVFYPGPGHTSDNITVGIDGTDIAFGGCLIKDSKAKSLGNLGDADTEHYAASARAFGAAFPKASMIVMSHSAPDSRAAITHTARMADK	7	248	95.2569	15	0	0	270	Cluster_118	subclass_B1_metallo-beta-lactamase_NDM-18_NG_052866.1_cds_WP_077064890.1_1	Cluster_120	LIPO_Sec_SPII_	25-26	LIPO_Sec_SPII_	25-26	H_x_H_x_D	H_x_x_D_N	C	H	.
B1_274	GCF_003038115.1	573	573	Klebsiella_pneumoniae	Bacteria-Pseudomonadota-Gammaproteobacteria-Enterobacterales-Enterobacteriaceae-Klebsiella_Raoultella_group-Klebsiella-	5569141	NZ_PWCX01000028.1	class_B1	272.4	-	6678	7446	6670	7482	ATGGAATTGCCCAATATTATGCACCCGGTCGCGAAGCTGAGCACCGCATTAGCCGCTGCATTGATGCTGAGCGGGTGCATGCCCGGTGAAATCCGCCCGACGATTGGCCAGCAAATGGAAACTGGCGACCAACGGTTTGGCGATCTGGTTTTCCGCCAGCTCGCACCGAATGTCTGGCAGCACACTTCCTATCTCGACATGCCGGGTTTCGGGGCAGTCGCTTCCAACGGTTTGATCGTCAGGGATGGCGGCCGCGTGCTGGTGGTCGATACCGCCTGGACCGATGACCAGACCGCCCAGATCCTCAACTGGATCAAGCAGGAGATCAACCTGCCGGTCGCGCTGGCGGTGGTGACTCACGCGCATCAGGACAAGATGGGCGGTATGGACGCGCTGCAT…	WP_004201164.1	subclass_B1_metallo-beta-lactamase_NDM-1	MELPNIMHPVAKLSTALAAALMLSGCMPGEIRPTIGQQMETGDQRFGDLVFRQLAPNVWQHTSYLDMPGFGAVASNGLIVRDGGRVLVVDTAWTDDQTAQILNWIKQEINLPVALAVVTHAHQDKMGGMDALHAAGIATYANALSNQLAPQEGMVAAQHSLTFAANGWVEPATAPNFGPLKVFYPGPGHTSDNITVGIDGTDIAFGGCLIKDSKAKSLGNLGDADTEHYAASARAFGAAFPKASMIVMSHSAPDSRAAITHTARMADKLR	ORF_OK	TRUE_HIT	kllllllllllllslaaa.........eekeeeekdelkiekladnvyvhtsykevegvgkvssngLvvidekevvlvDtpwteeqtekLldwiekklklkvkavistHfHeDrlGGlealnkkgiktyasalTnellkkegkeqakhsfkkeek......ltlgkekievfypGegHtkDNiVvwlpkekiLfGGClvksaeakslGnlgdAnveeWpksvekvkakypeakiVipGHgevgdkellehTlkllek	KLSTALAAALMLSGCMPGeirptigqqMETGDQRFGDLVFRQLAPNVWQHTSYLDMPGFGAVASNGLIVRDGGRVLVVDTAWTDDQTAQILNWIKQEINLPVALAVVTHAHQDKMGGMDALHAAGIATYANALSNQLAPQEGMVAAQHSLTFAANgwvepaTAPNFGPLKVFYPGPGHTSDNITVGIDGTDIAFGGCLIKDSKAKSLGNLGDADTEHYAASARAFGAAFPKASMIVMSHSAPDSRAAITHTARMADK	7	248	95.2569	15	0	0	270	Cluster_118	subclass_B1_metallo-beta-lactamase_NDM-18_NG_052866.1_cds_WP_077064890.1_1	Cluster_120	LIPO_Sec_SPII_	25-26	LIPO_Sec_SPII_	25-26	H_x_H_x_D	H_x_x_D_N	C	H	.
B1_275	GCF_003044305.1	2138576	2138576	Vitiosangium_sp_GDMCC_1.1324	Bacteria-Myxococcota-Myxococcia-Myxococcales-Cystobacterineae-Archangiaceae-Vitiosangium-unclassified_Vitiosangium-	14076305	NZ_PZOX01000023.1	class_B1	246	-	26562	27303	26536	27315	ATGCCCACCTTCCGCTCCTGTATCCTGCTCGTCCTGCTGACTGCCTGCGCCTCCTCGCGCCCCACCCCTTCCACCGAGACTCGGCCCGCCGCGCCCTCGGAGGAAACCGTGCTGGCCGACGACGTGCGCGTGCAACGCCTCGCCCCCGGCATCTGGCTGCATGTGACGCTCGCGGGGGAGGACTGGGGCCGGACCCCCGCGAATGGATTGCTCATCGAGGACGGCGAGTCCTCACTGCTCGTCGACACCGGCTGGAATGCGAAGCAGGCGGAGCACCTGCTCGCCTGGGCTCGGGACACGCTGCACCGGCCCGTGCGCGCCGCCGTGGTGACACATTTCCACATCGACCGGACCGGAGGCGTGCCCGCGCTCGAGGCCCGGGGCGTGCCCGTGTACGCG…	WP_108075503.1	subclass_B1_metallo-beta-lactamase	MPTFRSCILLVLLTACASSRPTPSTETRPAAPSEETVLADDVRVQRLAPGIWLHVTLAGEDWGRTPANGLLIEDGESSLLVDTGWNAKQAEHLLAWARDTLHRPVRAAVVTHFHIDRTGGVPALEARGVPVYARAETAKLASEHGQPVPAQRIADTKDLGPLSFFFPGAGHARDNLVVWHRASGLLFGGCFVKDADAHNLGNVADADVPAWPQSLERVRQRYPDVRTVVPGHGLPGGLELLTRTQELLREAGTGGPAPH	ORF_OK	TRUE_HIT	lllllllllllslaaa............eekeeeekdelkiekladnvyvhtsykevegvgkvssngLvvidekevvlvDtpwteeqtekLldwiekklklkvkavistHfHeDrlGGlealnkkgiktyasalTnellkkegkeqakhsfkkeekltlgkekievfypGegHtkDNiVvwlpkekiLfGGClvksaeakslGnlgdAnveeWpksvekvkakypeakiVipGHgevgdkellehTlklleka	FRSCILLVLLTACASSrptpstetrpaaPSEETVLADDVRVQRLAPGIWLHVTLA-GEDWGRTPANGLLIEDGESSLLVDTGWNAKQAEHLLAWARDTLHRPVRAAVVTHFHIDRTGGVPALEARGVPVYARAETAKLASEHGQPVPAQRIADTKD----LGPLSFFFPGAGHARDNLVVWHRASGLLFGGCFVKDADAHNLGNVADADVPAWPQSLERVRQRYPDVRTVVPGHGLPGGLELLTRTQELLREA	9	249	94.8617	12	5	0	259	Cluster_287	CLUSTER_NOT_IN_NCBI_AMR_REF_DB	Cluster_295	LIPO_Sec_SPII_	15-16	LIPO_Sec_SPII_	15-16	H_x_H_x_D	H_x_x_D_N	C	H	.
B1_276	GCF_003045165.1	492670	492670	Bacillus_velezensis	Bacteria-Terrabacteria_group-Bacillota-Bacilli-Bacillales-Bacillaceae-Bacillus-Bacillus_subtilis_group-Bacillus_amyloliquefaciens_group-	3929794	NZ_CP028437.1	class_B1	226.3	+	1159997	1160702	1159959	1160708	TTGAGAAAGCTTTCATTATTAATTGCGGGGTTATTTCTATTCGGCCTCTTTACTGCCGGAATGAAACCGGCACACGCGGCGGAGGGCTCCGCAGCAAAAGATGTCACTCTCACACAGCTGGCGCCGCATGTCTGGATGCATACAAGCACCGGTACGGCAGACGGAAGTCCCGTCCCTGCGAACGGATTGCTTCTTGAGACTTCAAAAGGAATCGTACTGATTGATACTCCGTGGAATGACAGTCTCACAGAGCAATTAATGACACAAATAAAACAGCGGTTTCCCGGCAAAAGGATGACCGATGCCATTGTGACACACGCCCATGACGATCGTATCGGCGGTCTGAACACCCTGTACAAATACGGGGTAAAGGTGCACAGCACGAAGCTGACCGCCGAC…	WP_032874487.1	subclass_B1_metallo-beta-lactamase	MRKLSLLIAGLFLFGLFTAGMKPAHAAEGSAAKDVTLTQLAPHVWMHTSTGTADGSPVPANGLLLETSKGIVLIDTPWNDSLTEQLMTQIKQRFPGKRMTDAIVTHAHDDRIGGLNTLYKYGVKVHSTKLTADFARQQGYDRPLGDLKNVTKLQFGDMKIETFYPGKGHTEDNIPVWLPEDKLLFGGCLIKALETKEIVPTPGFYPDQWPRAVSKVMKRYQDISIVVPGHGSPGDDRLLPHTINLLKET	ORF_OK	TRUE_HIT	lllllllslaaaeekeeeekdelkiekladnvyvhtsykevegvgkvssngLvvidekevvlvDtpwteeqtekLldwiekkl.klkvkavistHfHeDrlGGlealnkkgiktyasalTnellkkegkeqakhsfkkeekltlgkekievfypGegHtkDNiVvwlpkekiLfGGClvksaeakslGnlgdAnveeWpksvekvkakypeakiVipGHgevgdkellehTlkllek	LFGLFTAGMKPAHAAEGSAAKDVTLTQLAPHVWMHTSTGTADGS-PVPANGLLLETSKGIVLIDTPWNDSLTEQLMTQIKQRFpGKRMTDAIVTHAHDDRIGGLNTLYKYGVKVHSTKLTADFARQQGYDRPLGDLKNVTKLQFGDMKIETFYPGKGHTEDNIPVWLPEDKLLFGGCLIKALETKEIVPTPGFYPDQWPRAVSKVMKRYQDISIVVPGHGSPGDDRLLPHTINLLKE	13	248	92.8854	1	1	0	249	Cluster_210	CLUSTER_NOT_IN_NCBI_AMR_REF_DB	Cluster_216	SP_Sec_SPI_	26-27	SP_Sec_SPI_	26-27	H_x_H_x_D	H_x_x_D_N	C	H	.
B1_277	GCF_003045745.2	1392	1392	Bacillus_anthracis	Bacteria-Terrabacteria_group-Bacillota-Bacilli-Bacillales-Bacillaceae-Bacillus-Bacillus_cereus_group-	5461108	NZ_QANP01000009.1	class_B1	274.8	-	333988	334702	333986	334756	ATGAAAAATACATTATTAAAATTAGGGGTATGTGTTAGTTTACTAGGAATAACTCCATTTGTTAGTACAATTTCTTCTGTACAAGCAGAACGAAAGGTAGAGCATAAAGTAATAAAAAATGAGACAGGAACTATTTCAATTTCTCAGTTAAACAAAAATGTTTGGGTTCATACGGAGTTAGGTTATTTTAACGGAGAAGCAGTTCCTTCGAACGGTTTAATCCTTAATACTTCTAAAGGATTAGTACTTGTCGATTCTTCTTGGGATGATAAGTTAACGAAGGAATTAATAGAGATGGCAGAAAAGAAATTTAAGAAGAGTGTAACGGATGTTATTATTACACATGCACACGCTGATCGGATTGGTGGAATAAAAACGTTGAAAGAAAGAGGCATTAAA…	WP_000799223.1	BcII_family_subclass_B1_metallo-beta-lactamase	MKNTLLKLGVCVSLLGITPFVSTISSVQAERKVEHKVIKNETGTISISQLNKNVWVHTELGYFNGEAVPSNGLILNTSKGLVLVDSSWDDKLTKELIEMAEKKFKKSVTDVIITHAHADRIGGIKTLKERGIKAHSTTLTAELAKKNGYEEPLGDLQAITKLKFGNMKVETFYPGKGHTEDNIVVWLPQYNMLVGGCLVKSASAKDLGNITDAYVNEWSTSIENVLKRYENINFVVPGHGEVGDKGLLLHTLDLLK	ORF_OK	TRUE_HIT	llllslaaa........eekeeeekdelkiekladnvyvhtsykevegvgkvssngLvvidekevvlvDtpwteeqtekLldwiekklklkvkavistHfHeDrlGGlealnkkgiktyasalTnellkkegkeqakhsfkkeekltlgkekievfypGegHtkDNiVvwlpkekiLfGGClvksaeakslGnlgdAnveeWpksvekvkakypeakiVipGHgevgdkellehTlklle	TPFVSTISSvqaerkveHKVIKNETGTISISQLNKNVWVHTELGYFNGE-AVPSNGLILNTSKGLVLVDSSWDDKLTKELIEMAEKKFKKSVTDVIITHAHADRIGGIKTLKERGIKAHSTTLTAELAKKNGYEEPLGDLQAITKLKFGNMKVETFYPGKGHTEDNIVVWLPQYNMLVGGCLVKSASAKDLGNITDAYVNEWSTSIENVLKRYENINFVVPGHGEVGDKGLLLHTLDLLK	16	247	91.3043	8	1	0	256	Cluster_137	BcII_family_subclass_B1_metallo-beta-lactamase_NG_047224.1_cds_WP_012261328.1_1	Cluster_139	SP_Sec_SPI_	29-30	SP_Sec_SPI_	29-30	H_x_H_x_D	H_x_x_D_N	C	H	.
B1_278	GCF_003046465.1	1428	1428	Bacillus_thuringiensis	Bacteria-Terrabacteria_group-Bacillota-Bacilli-Bacillales-Bacillaceae-Bacillus-Bacillus_cereus_group-	5519270	NZ_PZQR01000116.1	class_B1	282.2	+	4593	5292	4522	5295	ATGAAAAAGAATACGTTGTTAAAAGTAGGATTATGTGTAGGTTTACTAGGAACAATTCAATTTGTTAGCACAATTTCTTCTGTACAAGCATCACAAAAGGTAGAGAAAACAGTAATAAAAAATGAGACGGGAACCATTTCAATATCTCAGTTAAACAAGAATGTATGGGTTCATACGGAGTTAGGTTCTTTTAATGGAGAAGCAGTTCCTTCGAACGGTCTAGTTCTTAATACTTCTAAAGGGTTAGTACTTGTTGATTCTTCTTGGGATGACAAATTAACGAAGGAACTAATAGAAATGGTAGAAAAGAAGTTTCAGAAGCGTGTAACGGATGTCATTATTACACATGCGCACGCTGATCGAATTGGCGGAATAAAAACGTTGAAAGAAAGAGGAATT…	WP_000742473.1	BcII_family_subclass_B1_metallo-beta-lactamase	MKKNTLLKVGLCVGLLGTIQFVSTISSVQASQKVEKTVIKNETGTISISQLNKNVWVHTELGSFNGEAVPSNGLVLNTSKGLVLVDSSWDDKLTKELIEMVEKKFQKRVTDVIITHAHADRIGGIKTLKERGIKAHSTALTAELAKKSGYEEPLGDLQTVTNLKFGNMKVETFYPGKGHTEDNIVVWLPQYNILVGGCLVKSTSAKDLGNVADAYVNEWSTSIENVLKRYRNINVVVPGHGEVGNKGLLLYTLDLLK	ORF_OK	TRUE_HIT	lllslaaa........eekeeeekdelkiekladnvyvhtsykevegvgkvssngLvvidekevvlvDtpwteeqtekLldwiekklklkvkavistHfHeDrlGGlealnkkgiktyasalTnellkkegkeqakhsfkkeekltlgkekievfypGegHtkDNiVvwlpkekiLfGGClvksaeakslGnlgdAnveeWpksvekvkakypeakiVipGHgevgdkellehTlklle	TIS----SvqasqkveKTVIKNETGTISISQLNKNVWVHTELGSFNGE-AVPSNGLVLNTSKGLVLVDSSWDDKLTKELIEMVEKKFQKRVTDVIITHAHADRIGGIKTLKERGIKAHSTALTAELAKKSGYEEPLGDLQTVTNLKFGNMKVETFYPGKGHTEDNIVVWLPQYNILVGGCLVKSTSAKDLGNVADAYVNEWSTSIENVLKRYRNINVVVPGHGEVGNKGLLLYTLDLLK	17	247	90.9091	8	5	0	257	Cluster_137	BcII_family_subclass_B1_metallo-beta-lactamase_NG_047224.1_cds_WP_012261328.1_1	Cluster_139	SP_Sec_SPI_	30-31	SP_Sec_SPI_	30-31	H_x_H_x_D	H_x_x_D_N	C	H	.
B1_279	GCF_003047005.1	492670	492670	Bacillus_velezensis	Bacteria-Terrabacteria_group-Bacillota-Bacilli-Bacillales-Bacillaceae-Bacillus-Bacillus_subtilis_group-Bacillus_amyloliquefaciens_group-	3893072	NZ_CP028440.1	class_B1	229.7	-	1228935	1229640	1228930	1229679	TTGAGAAAGCTTTCATTATTAATTGCGGGGTTATTTCTATTCGGCCTCTTTACTGCCGGAATGAAACCGGCACACGCGGCGGAGAGCTCCGCAGCAAAAGATGTCACTCTCACACAGCTGGCGCCGCATGTCTGGATGCATACAAGCATCGGTACGGCAGACGGAAGTCCCGTCCCTGCGAACGGATTGCTTCTTGAAACTTCCAAAGGAATCGTACTGATTGATACTCCGTGGAATGACAGTCTCACAGAGCAATTAATGACACAAATAAAACAGCGGTTTCCCGGTAAAAGGATGACCGATGCCATTGTGACACACGCCCATGACGATCGCATCGGCGGGCTGAACACACTGTACAAATACGGTGTAAAGGTGCACAGCACGAAGCTGACCGCCGAC…	WP_003154979.1	subclass_B1_metallo-beta-lactamase	MRKLSLLIAGLFLFGLFTAGMKPAHAAESSAAKDVTLTQLAPHVWMHTSIGTADGSPVPANGLLLETSKGIVLIDTPWNDSLTEQLMTQIKQRFPGKRMTDAIVTHAHDDRIGGLNTLYKYGVKVHSTKLTADFARQQGYDRPLGDMKNVTKLQFGDMKIETFYPGKGHTEDNITVWLPEDKLLFGGCLIKALETKEIIPTPGFYPDQWPRAVRKVMKRYQDISIVVPGHGSPGDDRLLPHTISLLKET	ORF_OK	TRUE_HIT	lllllllslaaaeekeeeekdelkiekladnvyvhtsykevegvgkvssngLvvidekevvlvDtpwteeqtekLldwiekkl.klkvkavistHfHeDrlGGlealnkkgiktyasalTnellkkegkeqakhsfkkeekltlgkekievfypGegHtkDNiVvwlpkekiLfGGClvksaeakslGnlgdAnveeWpksvekvkakypeakiVipGHgevgdkellehTlkllek	LFGLFTAGMKPAHAAESSAAKDVTLTQLAPHVWMHTSIGTADGS-PVPANGLLLETSKGIVLIDTPWNDSLTEQLMTQIKQRFpGKRMTDAIVTHAHDDRIGGLNTLYKYGVKVHSTKLTADFARQQGYDRPLGDMKNVTKLQFGDMKIETFYPGKGHTEDNITVWLPEDKLLFGGCLIKALETKEIIPTPGFYPDQWPRAVRKVMKRYQDISIVVPGHGSPGDDRLLPHTISLLKE	13	248	92.8854	1	1	0	249	Cluster_210	CLUSTER_NOT_IN_NCBI_AMR_REF_DB	Cluster_216	SP_Sec_SPI_	26-27	SP_Sec_SPI_	26-27	H_x_H_x_D	H_x_x_D_N	C	H	.
B1_28	GCF_002852865.1	548	548	Klebsiella_aerogenes	Bacteria-Pseudomonadota-Gammaproteobacteria-Enterobacterales-Enterobacteriaceae-Klebsiella_Raoultella_group-Klebsiella-	5190574	NZ_NWEB01000030.1	class_B1	272.4	-	6835	7603	6827	7639	ATGGAATTGCCCAATATTATGCACCCGGTCGCGAAGCTGAGCACCGCATTAGCCGCTGCATTGATGCTGAGCGGGTGCATGCCCGGTGAAATCCGCCCGACGATTGGCCAGCAAATGGAAACTGGCGACCAACGGTTTGGCGATCTGGTTTTCCGCCAGCTCGCACCGAATGTCTGGCAGCACACTTCCTATCTCGACATGCCGGGTTTCGGGGCAGTCGCTTCCAACGGTTTGATCGTCAGGGATGGCGGCCGCGTGCTGGTGGTCGATACCGCCTGGACCGATGACCAGACCGCCCAGATCCTCAACTGGATCAAGCAGGAGATCAACCTGCCGGTCGCGCTGGCGGTGGTGACTCACGCGCATCAGGACAAGATGGGCGGTATGGACGCGCTGCAT…	WP_004201164.1	subclass_B1_metallo-beta-lactamase_NDM-1	MELPNIMHPVAKLSTALAAALMLSGCMPGEIRPTIGQQMETGDQRFGDLVFRQLAPNVWQHTSYLDMPGFGAVASNGLIVRDGGRVLVVDTAWTDDQTAQILNWIKQEINLPVALAVVTHAHQDKMGGMDALHAAGIATYANALSNQLAPQEGMVAAQHSLTFAANGWVEPATAPNFGPLKVFYPGPGHTSDNITVGIDGTDIAFGGCLIKDSKAKSLGNLGDADTEHYAASARAFGAAFPKASMIVMSHSAPDSRAAITHTARMADKLR	ORF_OK	TRUE_HIT	kllllllllllllslaaa.........eekeeeekdelkiekladnvyvhtsykevegvgkvssngLvvidekevvlvDtpwteeqtekLldwiekklklkvkavistHfHeDrlGGlealnkkgiktyasalTnellkkegkeqakhsfkkeek......ltlgkekievfypGegHtkDNiVvwlpkekiLfGGClvksaeakslGnlgdAnveeWpksvekvkakypeakiVipGHgevgdkellehTlkllek	KLSTALAAALMLSGCMPGeirptigqqMETGDQRFGDLVFRQLAPNVWQHTSYLDMPGFGAVASNGLIVRDGGRVLVVDTAWTDDQTAQILNWIKQEINLPVALAVVTHAHQDKMGGMDALHAAGIATYANALSNQLAPQEGMVAAQHSLTFAANgwvepaTAPNFGPLKVFYPGPGHTSDNITVGIDGTDIAFGGCLIKDSKAKSLGNLGDADTEHYAASARAFGAAFPKASMIVMSHSAPDSRAAITHTARMADK	7	248	95.2569	15	0	0	270	Cluster_118	subclass_B1_metallo-beta-lactamase_NDM-18_NG_052866.1_cds_WP_077064890.1_1	Cluster_120	LIPO_Sec_SPII_	25-26	LIPO_Sec_SPII_	25-26	H_x_H_x_D	H_x_x_D_N	C	H	.
B1_280	GCF_003047025.1	492670	492670	Bacillus_velezensis	Bacteria-Terrabacteria_group-Bacillota-Bacilli-Bacillales-Bacillaceae-Bacillus-Bacillus_subtilis_group-Bacillus_amyloliquefaciens_group-	3893071	NZ_CP028439.1	class_B1	229.7	-	2917656	2918361	2917651	2918400	TTGAGAAAGCTTTCATTATTAATTGCGGGGTTATTTCTATTCGGCCTCTTTACTGCCGGAATGAAACCGGCACACGCGGCGGAGAGCTCCGCAGCAAAAGATGTCACTCTCACACAGCTGGCGCCGCATGTCTGGATGCATACAAGCATCGGTACGGCAGACGGAAGTCCCGTCCCTGCGAACGGATTGCTTCTTGAAACTTCCAAAGGAATCGTACTGATTGATACTCCGTGGAATGACAGTCTCACAGAGCAATTAATGACACAAATAAAACAGCGGTTTCCCGGTAAAAGGATGACCGATGCCATTGTGACACACGCCCATGACGATCGCATCGGCGGGCTGAACACACTGTACAAATACGGTGTAAAGGTGCACAGCACGAAGCTGACCGCCGAC…	WP_003154979.1	subclass_B1_metallo-beta-lactamase	MRKLSLLIAGLFLFGLFTAGMKPAHAAESSAAKDVTLTQLAPHVWMHTSIGTADGSPVPANGLLLETSKGIVLIDTPWNDSLTEQLMTQIKQRFPGKRMTDAIVTHAHDDRIGGLNTLYKYGVKVHSTKLTADFARQQGYDRPLGDMKNVTKLQFGDMKIETFYPGKGHTEDNITVWLPEDKLLFGGCLIKALETKEIIPTPGFYPDQWPRAVRKVMKRYQDISIVVPGHGSPGDDRLLPHTISLLKET	ORF_OK	TRUE_HIT	lllllllslaaaeekeeeekdelkiekladnvyvhtsykevegvgkvssngLvvidekevvlvDtpwteeqtekLldwiekkl.klkvkavistHfHeDrlGGlealnkkgiktyasalTnellkkegkeqakhsfkkeekltlgkekievfypGegHtkDNiVvwlpkekiLfGGClvksaeakslGnlgdAnveeWpksvekvkakypeakiVipGHgevgdkellehTlkllek	LFGLFTAGMKPAHAAESSAAKDVTLTQLAPHVWMHTSIGTADGS-PVPANGLLLETSKGIVLIDTPWNDSLTEQLMTQIKQRFpGKRMTDAIVTHAHDDRIGGLNTLYKYGVKVHSTKLTADFARQQGYDRPLGDMKNVTKLQFGDMKIETFYPGKGHTEDNITVWLPEDKLLFGGCLIKALETKEIIPTPGFYPDQWPRAVRKVMKRYQDISIVVPGHGSPGDDRLLPHTISLLKE	13	248	92.8854	1	1	0	249	Cluster_210	CLUSTER_NOT_IN_NCBI_AMR_REF_DB	Cluster_216	SP_Sec_SPI_	26-27	SP_Sec_SPI_	26-27	H_x_H_x_D	H_x_x_D_N	C	H	.
B1_281	GCF_003047045.1	492670	492670	Bacillus_velezensis	Bacteria-Terrabacteria_group-Bacillota-Bacilli-Bacillales-Bacillaceae-Bacillus-Bacillus_subtilis_group-Bacillus_amyloliquefaciens_group-	3893029	NZ_CP028441.1	class_B1	229.7	+	722822	723527	722784	723533	TTGAGAAAGCTTTCATTATTAATTGCGGGGTTATTTCTATTCGGCCTCTTTACTGCCGGAATGAAACCGGCACACGCGGCGGAGAGCTCCGCAGCAAAAGATGTCACTCTCACACAGCTGGCGCCGCATGTCTGGATGCATACAAGCATCGGTACGGCAGACGGAAGTCCCGTCCCTGCGAACGGATTGCTTCTTGAAACTTCCAAAGGAATCGTACTGATTGATACTCCGTGGAATGACAGTCTCACAGAGCAATTAATGACACAAATAAAACAGCGGTTTCCCGGTAAAAGGATGACCGATGCCATTGTGACACACGCCCATGACGATCGCATCGGCGGGCTGAACACACTGTACAAATACGGTGTAAAGGTGCACAGCACGAAGCTGACCGCCGAC…	WP_003154979.1	subclass_B1_metallo-beta-lactamase	MRKLSLLIAGLFLFGLFTAGMKPAHAAESSAAKDVTLTQLAPHVWMHTSIGTADGSPVPANGLLLETSKGIVLIDTPWNDSLTEQLMTQIKQRFPGKRMTDAIVTHAHDDRIGGLNTLYKYGVKVHSTKLTADFARQQGYDRPLGDMKNVTKLQFGDMKIETFYPGKGHTEDNITVWLPEDKLLFGGCLIKALETKEIIPTPGFYPDQWPRAVRKVMKRYQDISIVVPGHGSPGDDRLLPHTISLLKET	ORF_OK	TRUE_HIT	lllllllslaaaeekeeeekdelkiekladnvyvhtsykevegvgkvssngLvvidekevvlvDtpwteeqtekLldwiekkl.klkvkavistHfHeDrlGGlealnkkgiktyasalTnellkkegkeqakhsfkkeekltlgkekievfypGegHtkDNiVvwlpkekiLfGGClvksaeakslGnlgdAnveeWpksvekvkakypeakiVipGHgevgdkellehTlkllek	LFGLFTAGMKPAHAAESSAAKDVTLTQLAPHVWMHTSIGTADGS-PVPANGLLLETSKGIVLIDTPWNDSLTEQLMTQIKQRFpGKRMTDAIVTHAHDDRIGGLNTLYKYGVKVHSTKLTADFARQQGYDRPLGDMKNVTKLQFGDMKIETFYPGKGHTEDNITVWLPEDKLLFGGCLIKALETKEIIPTPGFYPDQWPRAVRKVMKRYQDISIVVPGHGSPGDDRLLPHTISLLKE	13	248	92.8854	1	1	0	249	Cluster_210	CLUSTER_NOT_IN_NCBI_AMR_REF_DB	Cluster_216	SP_Sec_SPI_	26-27	SP_Sec_SPI_	26-27	H_x_H_x_D	H_x_x_D_N	C	H	.
B1_282	GCF_003047165.1	2093834	2093834	Bacillus_sp_ZY-1-1	Bacteria-Terrabacteria_group-Bacillota-Bacilli-Bacillales-Bacillaceae-Bacillus-unclassified_Bacillus_in_firmicutes-	3899251	NZ_CP027061.1	class_B1	230.3	-	2765677	2766382	2765672	2766421	TTGAGAAAGCTTTCATTATTAATTGCGGGGTTATTTCTATTCGGCCTCTTTACTGCCGGAATGAAACCGGCACACGCGGCGGAGAGCTCCGCAGCAAAAGATGTCACTCTCACACAGCTGGAGCCGCATGTCTGGATGCATACAAGCATCGGTACGGCAGACGGAAGTCCCGTCCCTGCGAACGGATTGCTTCTTGAAACTTCCAAAGGAATCGTACTGATTGATACTCCGTGGAATGACAGTCTCACAGAGCAATTAATGACACAAATAAAACAGCGGTTTCCCGGTAAAAGGATGACCGATGCCATTGTGACACACGCCCATGACGATCGCATCGGCGGGCTGAACGCACTGTACAAATACGGTGTAAAGGTGCACAGCACGAAGCTGACCGCCGAC…	WP_107994446.1	subclass_B1_metallo-beta-lactamase	MRKLSLLIAGLFLFGLFTAGMKPAHAAESSAAKDVTLTQLEPHVWMHTSIGTADGSPVPANGLLLETSKGIVLIDTPWNDSLTEQLMTQIKQRFPGKRMTDAIVTHAHDDRIGGLNALYKYGVKVHSTKLTADFARQQGYDRPLGDLKNVTKLQFGDMKIETFYPGKGHTEDNITVWLPEDKLLFGGCLIKALETKEIIPTPGFYPDQWPRAVRKVMKRYQDISIVVPGHGSPGDDRLLPHTISLLKET	ORF_OK	TRUE_HIT	lllllllslaaaeekeeeekdelkiekladnvyvhtsykevegvgkvssngLvvidekevvlvDtpwteeqtekLldwiekkl.klkvkavistHfHeDrlGGlealnkkgiktyasalTnellkkegkeqakhsfkkeekltlgkekievfypGegHtkDNiVvwlpkekiLfGGClvksaeakslGnlgdAnveeWpksvekvkakypeakiVipGHgevgdkellehTlkllek	LFGLFTAGMKPAHAAESSAAKDVTLTQLEPHVWMHTSIGTADGS-PVPANGLLLETSKGIVLIDTPWNDSLTEQLMTQIKQRFpGKRMTDAIVTHAHDDRIGGLNALYKYGVKVHSTKLTADFARQQGYDRPLGDLKNVTKLQFGDMKIETFYPGKGHTEDNITVWLPEDKLLFGGCLIKALETKEIIPTPGFYPDQWPRAVRKVMKRYQDISIVVPGHGSPGDDRLLPHTISLLKE	13	248	92.8854	1	1	0	249	Cluster_210	CLUSTER_NOT_IN_NCBI_AMR_REF_DB	Cluster_216	SP_Sec_SPI_	26-27	SP_Sec_SPI_	26-27	H_x_H_x_D	H_x_x_D_N	C	H	.
B1_283	GCF_003049905.1	29497	29497	Vibrio_splendidus	Bacteria-Pseudomonadota-Gammaproteobacteria-Vibrionales-Vibrionaceae-Vibrio-	5341905	NZ_PIFE01000002.1	class_B1	270	+	306663	307374	306640	307380	ATGTACAAAATTACTTTGACGCTGTTAAATGCTGTCATTGCTTTTAGCAGTGTTGCCGATGAAAAGTCGATTAAGCCTCTTCAATTTGAAGAAATTAAGAACAACGTATTTTTAGTTAAATCATATCGTGAGTTTGTCAATTTGCAGACTCCGGGTAACCCTGTAGTGCTCGATGCAAATTCGTTGATATATATCGATGGGACGGATGCCTATCTAATTGATACTCCGTGGAATGCATCTAATATGCCTCAACTAATGGAGTGGATCGAAAGTAAGGGGTTTACGTTAAAGAAGACGGTTTTTTCTCATTTCCATGAAGATCAAACAGGTGGCTTAGAGTACCTTCAACAACACAATTTCGAAACTTACGCTTCTGGTTTAACTAATCGTTTATTGAAA…	WP_108117279.1	ALI_family_subclass_B1_metallo-beta-lactamase	MYKITLTLLNAVIAFSSVADEKSIKPLQFEEIKNNVFLVKSYREFVNLQTPGNPVVLDANSLIYIDGTDAYLIDTPWNASNMPQLMEWIESKGFTLKKTVFSHFHEDQTGGLEYLQQHNFETYASGLTNRLLKHDNKKPTNHEFSGDNFVLLENKIEVFYPGAGHSKDNVVVWMPKEKVLVGGCLMRANEVNTIGWVGDADINKWSGSAQKVLAKYPQAELVVPGHGNVGKGNSIIHHTIDIANQL	ORF_OK	TRUE_HIT	llllslaaaeekeeeekdelkiekladnvyvhtsykevegv......gkvssngLvvidekevvlvDtpwteeqtekLldwiekklklkvkavistHfHeDrlGGlealnkkgiktyasalTnellkkegkeqakhsfkkeekltlgkekievfypGegHtkDNiVvwlpkekiLfGGClvksaeakslGnlgdAnveeWpksvekvkakypeakiVipGHgevgd.kellehTlkllek	LLNAVIAFSSVADEKSIKPLQFEEIKNNVFLVKSYREFVNLqtpgnpVVLDANSLIYIDGTDAYLIDTPWNASNMPQLMEWIES-KGFTLKKTVFSHFHEDQTGGLEYLQQHNFETYASGLTNRLLKHDNKKPTNHEFSGDNF-VLLENKIEVFYPGAGHSKDNVVVWMPKEKVLVGGCLMRANEVNTIGWVGDADINKWSGSAQKVLAKYPQAELVVPGHGNVGKgNSIIHHTIDIANQ	16	248	91.6996	7	2	0	246	Cluster_729	CLUSTER_NOT_IN_NCBI_AMR_REF_DB	Cluster_734	SP_Sec_SPI_	19-20	SP_Sec_SPI_	19-20	H_x_H_x_D	H_x_x_D_N	C	H	.
B1_284	GCF_003049925.1	29497	29497	Vibrio_splendidus	Bacteria-Pseudomonadota-Gammaproteobacteria-Vibrionales-Vibrionaceae-Vibrio-	5456227	NZ_PIEZ01000020.1	class_B1	269.4	-	22326	23037	22321	23061	ATGTACAAAATTACTTTGACGCTGTTAAATGCTGTCATTGCTTTTAGCAGTGTTGCCGATGAAAAGTCGATTAAGCCTCTTCAATTTGAAGAAATTAAGAACAACGTATTTTTAGTTAAATCATATCGTGAGTTTGTCAATTTGCAGACTCCGGGTAACCCTGTAGTGCTCGATGCAAATTCGTTGATATATATCGATGGGACGGATGCCTATCTAATTGATACTCCGTGGAATGCATCTAATATGCCTCAACTAATGGAGTGGATCGAAAGTAAGGGGTTTACGTTAAAGAAGACGGTTTTTTCTCATTTCCATGAAGATCAAACAGGTGGCTTAGAGTACCTTCAACAACACAATTTCGAAACTTACGCTTCTGTTTTCACTAATCGTTTATTGAAA…	WP_017077840.1	ALI_family_subclass_B1_metallo-beta-lactamase	MYKITLTLLNAVIAFSSVADEKSIKPLQFEEIKNNVFLVKSYREFVNLQTPGNPVVLDANSLIYIDGTDAYLIDTPWNASNMPQLMEWIESKGFTLKKTVFSHFHEDQTGGLEYLQQHNFETYASVFTNRLLKHDNKKPTNHEFSGDNFVLLENKIEVFYPGAGHSKDNVVVWMPKEKVLVGGCLMRANEVNTIGWVGDADIKKWSGSAQKVLAKYPQAELVVPGHGNVGKGNSIIHHTVDIANQL	ORF_OK	TRUE_HIT	llllslaaaeekeeeekdelkiekladnvyvhtsykevegv......gkvssngLvvidekevvlvDtpwteeqtekLldwiekklklkvkavistHfHeDrlGGlealnkkgiktyasalTnellkkegkeqakhsfkkeekltlgkekievfypGegHtkDNiVvwlpkekiLfGGClvksaeakslGnlgdAnveeWpksvekvkakypeakiVipGHgevgd.kellehTlkllek	LLNAVIAFSSVADEKSIKPLQFEEIKNNVFLVKSYREFVNLqtpgnpVVLDANSLIYIDGTDAYLIDTPWNASNMPQLMEWIES-KGFTLKKTVFSHFHEDQTGGLEYLQQHNFETYASVFTNRLLKHDNKKPTNHEFSGDNF-VLLENKIEVFYPGAGHSKDNVVVWMPKEKVLVGGCLMRANEVNTIGWVGDADIKKWSGSAQKVLAKYPQAELVVPGHGNVGKgNSIIHHTVDIANQ	16	248	91.6996	7	2	0	246	Cluster_729	CLUSTER_NOT_IN_NCBI_AMR_REF_DB	Cluster_734	SP_Sec_SPI_	19-20	SP_Sec_SPI_	19-20	H_x_H_x_D	H_x_x_D_N	C	H	.
B1_285	GCF_003049945.1	29497	29497	Vibrio_splendidus	Bacteria-Pseudomonadota-Gammaproteobacteria-Vibrionales-Vibrionaceae-Vibrio-	5451996	NZ_PIFJ01000004.1	class_B1	270.6	+	1685	2396	1662	2402	ATGTACAAAATTACTTTGACGCTGTTAAATGCTGTCATTGCTTTTAGCAGTGTTGCCGATGAAAAGTCGATTAAGCCTCTTCAATTTGAAGAAATTAAGAACAACGTATTTTTAGTTAAATCATATCGTGAGTTTGTCAATTTGCAGACTCCGGGTAACCCTGTAGTGCTCGATGCAAATTCGTTGATATATATCGATGGGACGGATGCCTATCTAATTGATACTCCGTGGAATGCATCTAATATGCCTCAACTAATGGAGTGGATCGAAAGTAAGGGGTTTACGTTAAAGAAGACGGTTTTTTCTCATTTCCATGAAGATCAAACAGGTGGCTTAGAGTACCTTCAACAACACAATTTCGAAACTTACGCTTCTGGTTTAACTAATCGTTTATTGAAA…	WP_108117279.1	ALI_family_subclass_B1_metallo-beta-lactamase	MYKITLTLLNAVIAFSSVADEKSIKPLQFEEIKNNVFLVKSYREFVNLQTPGNPVVLDANSLIYIDGTDAYLIDTPWNASNMPQLMEWIESKGFTLKKTVFSHFHEDQTGGLEYLQQHNFETYASGLTNRLLKHDNKKPTNHEFSGDNFVLLENKIEVFYPGAGHSKDNVVVWMPKEKVLVGGCLMRANEVNTIGWVGDADINKWSGSAQKVLAKYPQAELVVPGHGNVGKGNSIIHHTIDIANQL	ORF_OK	TRUE_HIT	llllslaaaeekeeeekdelkiekladnvyvhtsykevegv......gkvssngLvvidekevvlvDtpwteeqtekLldwiekklklkvkavistHfHeDrlGGlealnkkgiktyasalTnellkkegkeqakhsfkkeekltlgkekievfypGegHtkDNiVvwlpkekiLfGGClvksaeakslGnlgdAnveeWpksvekvkakypeakiVipGHgevgd.kellehTlkllek	LLNAVIAFSSVADEKSIKPLQFEEIKNNVFLVKSYREFVNLqtpgnpVVLDANSLIYIDGTDAYLIDTPWNASNMPQLMEWIES-KGFTLKKTVFSHFHEDQTGGLEYLQQHNFETYASGLTNRLLKHDNKKPTNHEFSGDNF-VLLENKIEVFYPGAGHSKDNVVVWMPKEKVLVGGCLMRANEVNTIGWVGDADINKWSGSAQKVLAKYPQAELVVPGHGNVGKgNSIIHHTIDIANQ	16	248	91.6996	7	2	0	246	Cluster_729	CLUSTER_NOT_IN_NCBI_AMR_REF_DB	Cluster_734	SP_Sec_SPI_	19-20	SP_Sec_SPI_	19-20	H_x_H_x_D	H_x_x_D_N	C	H	.
B1_286	GCF_003050005.1	29497	29497	Vibrio_splendidus	Bacteria-Pseudomonadota-Gammaproteobacteria-Vibrionales-Vibrionaceae-Vibrio-	5340706	NZ_PIFI01000003.1	class_B1	270.4	-	333124	333835	333119	333859	ATGTACAAAATTACTTTGACGCTGTTAAATGCTGTCATTGCTTTTAGCAGTGTTGCCGATGAAAAGTCGATTAAGCCTCTTCAATTTGAAGAAATTAAGAACAACGTATTTTTAGTTAAATCATATCGTGAGTTTGTCAATTTGCAGACTCCGGGTAACCCTGTAGTGCTCGATGCAAATTCGTTGATATATATCGATGGGACGGATGCCTATCTAATTGATACTCCGTGGAATGCATCTAATATGCCTCAACTAATGGAGTGGATCGAAAGTAAGGGGTTTACGTTAAAGAAGACGGTTTTTTCTCATTTCCATGAAGATCAAACAGGTGGCTTAGAGTACCTTCAACAACACAATTTCGAAACTTACGCTTCTGGTTTAACTAATCGTTTATTGAAA…	WP_108117279.1	ALI_family_subclass_B1_metallo-beta-lactamase	MYKITLTLLNAVIAFSSVADEKSIKPLQFEEIKNNVFLVKSYREFVNLQTPGNPVVLDANSLIYIDGTDAYLIDTPWNASNMPQLMEWIESKGFTLKKTVFSHFHEDQTGGLEYLQQHNFETYASGLTNRLLKHDNKKPTNHEFSGDNFVLLENKIEVFYPGAGHSKDNVVVWMPKEKVLVGGCLMRANEVNTIGWVGDADINKWSGSAQKVLAKYPQAELVVPGHGNVGKGNSIIHHTIDIANQL	ORF_OK	TRUE_HIT	llllslaaaeekeeeekdelkiekladnvyvhtsykevegv......gkvssngLvvidekevvlvDtpwteeqtekLldwiekklklkvkavistHfHeDrlGGlealnkkgiktyasalTnellkkegkeqakhsfkkeekltlgkekievfypGegHtkDNiVvwlpkekiLfGGClvksaeakslGnlgdAnveeWpksvekvkakypeakiVipGHgevgd.kellehTlkllek	LLNAVIAFSSVADEKSIKPLQFEEIKNNVFLVKSYREFVNLqtpgnpVVLDANSLIYIDGTDAYLIDTPWNASNMPQLMEWIES-KGFTLKKTVFSHFHEDQTGGLEYLQQHNFETYASGLTNRLLKHDNKKPTNHEFSGDNF-VLLENKIEVFYPGAGHSKDNVVVWMPKEKVLVGGCLMRANEVNTIGWVGDADINKWSGSAQKVLAKYPQAELVVPGHGNVGKgNSIIHHTIDIANQ	16	248	91.6996	7	2	0	246	Cluster_729	CLUSTER_NOT_IN_NCBI_AMR_REF_DB	Cluster_734	SP_Sec_SPI_	19-20	SP_Sec_SPI_	19-20	H_x_H_x_D	H_x_x_D_N	C	H	.
B1_287	GCF_003050025.1	29497	29497	Vibrio_splendidus	Bacteria-Pseudomonadota-Gammaproteobacteria-Vibrionales-Vibrionaceae-Vibrio-	5350292	NZ_PIFY01000007.1	class_B1	271.3	+	1604	2315	1581	2321	ATGTACAAAATTACTTTGACGCTGTTAAATGCTGTCATTGCTTTTAGCAGTGTTGCCGATGAAAAGTCGATTAAGCCTCTTCAATTTGAAGAAATTAAGAACAACGTATTTTTAGTTAAATCATATCGTGAGTTTGTCAATTTGCAGACTCCGGGTAACCCTGTAGTGCTCGATGCAAATTCGTTGATATATATCGATGGGACGGATGCCTATCTAATTGATACTCCGTGGAATGCATCTAATATGCCTCAACTAATGGAGTGGATCGAAAGTAAGGGGTTTACGTTAAAGAAGACGGTTTTTTCTCATTTCCATGAAGATCAAACAGGTGGCTTAGAGTACCTTCAACAACACAATTTCGAAACTTACGCTTCTGGTTTAACTAATCGTTTATTGAAA…	WP_108117279.1	ALI_family_subclass_B1_metallo-beta-lactamase	MYKITLTLLNAVIAFSSVADEKSIKPLQFEEIKNNVFLVKSYREFVNLQTPGNPVVLDANSLIYIDGTDAYLIDTPWNASNMPQLMEWIESKGFTLKKTVFSHFHEDQTGGLEYLQQHNFETYASGLTNRLLKHDNKKPTNHEFSGDNFVLLENKIEVFYPGAGHSKDNVVVWMPKEKVLVGGCLMRANEVNTIGWVGDADINKWSGSAQKVLAKYPQAELVVPGHGNVGKGNSIIHHTIDIANQL	ORF_OK	TRUE_HIT	llllslaaaeekeeeekdelkiekladnvyvhtsykevegv......gkvssngLvvidekevvlvDtpwteeqtekLldwiekklklkvkavistHfHeDrlGGlealnkkgiktyasalTnellkkegkeqakhsfkkeekltlgkekievfypGegHtkDNiVvwlpkekiLfGGClvksaeakslGnlgdAnveeWpksvekvkakypeakiVipGHgevgd.kellehTlkllek	LLNAVIAFSSVADEKSIKPLQFEEIKNNVFLVKSYREFVNLqtpgnpVVLDANSLIYIDGTDAYLIDTPWNASNMPQLMEWIES-KGFTLKKTVFSHFHEDQTGGLEYLQQHNFETYASGLTNRLLKHDNKKPTNHEFSGDNF-VLLENKIEVFYPGAGHSKDNVVVWMPKEKVLVGGCLMRANEVNTIGWVGDADINKWSGSAQKVLAKYPQAELVVPGHGNVGKgNSIIHHTIDIANQ	16	248	91.6996	7	2	0	246	Cluster_729	CLUSTER_NOT_IN_NCBI_AMR_REF_DB	Cluster_734	SP_Sec_SPI_	19-20	SP_Sec_SPI_	19-20	H_x_H_x_D	H_x_x_D_N	C	H	.
B1_288	GCF_003050205.1	29497	29497	Vibrio_splendidus	Bacteria-Pseudomonadota-Gammaproteobacteria-Vibrionales-Vibrionaceae-Vibrio-	5380622	NZ_PIFC01000035.1	class_B1	272.9	+	34213	34924	34190	34930	ATGTACAAAATTACTTTGACGCTGTTAAATGCTGTCATTGCTTTTAGCAGTGTTGCCGATGAAAAGTCGATTAAGCCTCTTCAATTTGAAGAAATTAAGAACAACGTATTTTTAGTTAAATCATATCGTGAGTTTGTCAATTTGCAGACTCCGGGTAACCCTGTAGTGCTCGATGCAAATTCGTTGATATATATCGATGGGACGGATGCCTATCTAATTGATACTCCGTGGAATGCATCTAATATGCCTCAACTAATGGAGTGGATCGAAAGTAAGGGGTTTACGTTAAAGAAGACGGTTTTTTCTCATTTCCATGAAGATCAAACAGGTGGCTTAGAGTACCTTCAACAACACAATTTCGAAACTTACGCTTCTGGTTTAACTAATCGTTTATTGAAA…	WP_108117279.1	ALI_family_subclass_B1_metallo-beta-lactamase	MYKITLTLLNAVIAFSSVADEKSIKPLQFEEIKNNVFLVKSYREFVNLQTPGNPVVLDANSLIYIDGTDAYLIDTPWNASNMPQLMEWIESKGFTLKKTVFSHFHEDQTGGLEYLQQHNFETYASGLTNRLLKHDNKKPTNHEFSGDNFVLLENKIEVFYPGAGHSKDNVVVWMPKEKVLVGGCLMRANEVNTIGWVGDADINKWSGSAQKVLAKYPQAELVVPGHGNVGKGNSIIHHTIDIANQL	ORF_OK	TRUE_HIT	llllslaaaeekeeeekdelkiekladnvyvhtsykevegv......gkvssngLvvidekevvlvDtpwteeqtekLldwiekklklkvkavistHfHeDrlGGlealnkkgiktyasalTnellkkegkeqakhsfkkeekltlgkekievfypGegHtkDNiVvwlpkekiLfGGClvksaeakslGnlgdAnveeWpksvekvkakypeakiVipGHgevgd.kellehTlkllek	LLNAVIAFSSVADEKSIKPLQFEEIKNNVFLVKSYREFVNLqtpgnpVVLDANSLIYIDGTDAYLIDTPWNASNMPQLMEWIES-KGFTLKKTVFSHFHEDQTGGLEYLQQHNFETYASGLTNRLLKHDNKKPTNHEFSGDNF-VLLENKIEVFYPGAGHSKDNVVVWMPKEKVLVGGCLMRANEVNTIGWVGDADINKWSGSAQKVLAKYPQAELVVPGHGNVGKgNSIIHHTIDIANQ	16	248	91.6996	7	2	0	246	Cluster_729	CLUSTER_NOT_IN_NCBI_AMR_REF_DB	Cluster_734	SP_Sec_SPI_	19-20	SP_Sec_SPI_	19-20	H_x_H_x_D	H_x_x_D_N	C	H	.
B1_289	GCF_003050225.1	29497	29497	Vibrio_splendidus	Bacteria-Pseudomonadota-Gammaproteobacteria-Vibrionales-Vibrionaceae-Vibrio-	5478817	NZ_PIFG01000001.1	class_B1	267	-	161480	162191	161475	162215	ATGTACAAAATTACTTTGACGCTGTTAAATGCTGTCATTGCTTTTAGCAGTGTTGCCGATGAAAAGTCGATTAAGCCTCTTCAATTTGAAGAAATTAAGAACAACGTATTTTTAGTTAAATCATATCGTGAGTTTGTCAATTTGCAGACTCCGGGTAACCCTGTAGTGCTCGATGCAAATTCGTTGATATATATCGATGGGACGGATGCCTATCTAATTGATACTCCGTGGAATGCATCTAATATGCCTCAACTAATGGAGTGGATCGAAAGTAAGGGGTTTACGTTAAAGAAGACGGTTTTTTCTCATTTCCATGAAGATCAAACAGGTGGCTTAGAGTACCTTCAACAACACAATTTCGAAACTTACGCTTCTGTTTTCACTAATCGTTTATTGAAA…	WP_017077840.1	ALI_family_subclass_B1_metallo-beta-lactamase	MYKITLTLLNAVIAFSSVADEKSIKPLQFEEIKNNVFLVKSYREFVNLQTPGNPVVLDANSLIYIDGTDAYLIDTPWNASNMPQLMEWIESKGFTLKKTVFSHFHEDQTGGLEYLQQHNFETYASVFTNRLLKHDNKKPTNHEFSGDNFVLLENKIEVFYPGAGHSKDNVVVWMPKEKVLVGGCLMRANEVNTIGWVGDADIKKWSGSAQKVLAKYPQAELVVPGHGNVGKGNSIIHHTVDIANQL	ORF_OK	TRUE_HIT	llllslaaaeekeeeekdelkiekladnvyvhtsykevegv......gkvssngLvvidekevvlvDtpwteeqtekLldwiekklklkvkavistHfHeDrlGGlealnkkgiktyasalTnellkkegkeqakhsfkkeekltlgkekievfypGegHtkDNiVvwlpkekiLfGGClvksaeakslGnlgdAnveeWpksvekvkakypeakiVipGHgevgd.kellehTlkllek	LLNAVIAFSSVADEKSIKPLQFEEIKNNVFLVKSYREFVNLqtpgnpVVLDANSLIYIDGTDAYLIDTPWNASNMPQLMEWIES-KGFTLKKTVFSHFHEDQTGGLEYLQQHNFETYASVFTNRLLKHDNKKPTNHEFSGDNF-VLLENKIEVFYPGAGHSKDNVVVWMPKEKVLVGGCLMRANEVNTIGWVGDADIKKWSGSAQKVLAKYPQAELVVPGHGNVGKgNSIIHHTVDIANQ	16	248	91.6996	7	2	0	246	Cluster_729	CLUSTER_NOT_IN_NCBI_AMR_REF_DB	Cluster_734	SP_Sec_SPI_	19-20	SP_Sec_SPI_	19-20	H_x_H_x_D	H_x_x_D_N	C	H	.
B1_29	GCF_002852895.1	72407	573	Klebsiella_pneumoniae_subsp_pneumoniae	Bacteria-Pseudomonadota-Gammaproteobacteria-Enterobacterales-Enterobacteriaceae-Klebsiella_Raoultella_group-Klebsiella-	5440838	NZ_NWEC01000032.1	class_B1	300.9	-	22942	23650	22907	23647	ATGAGCAAGTTATCTGTATTCTTTATATTTTTGTTTTGTAGCATTGCTACCGCAGCAGAGCCTTTGCCAGATTTAAAAATTGAAAAACTTGATGAAGGCGTTTATGTTCATACTTCGTTTGAAGAAGTTAACGGGTGGGGCGTTGTTCCTAAACATGGTTTGGTTGTTCTTGTAGATGCTGAAGCTTATCTAATTGACACTCCATTTACGGCTAAAGATACTGAAAAGTTAGTCACTTGGTTTGTGGAACGTGGCTATAAAATAAAAGGCAGTATTTCCTCTCATTTTCATAGTGACAGCACGGGCGGAATAGAGTGGCTTAATTCTCAATCCATCCCCACGTATGCGTCTGAATTAACTAATGAGCTGCTTAAAAAAGACGGTAAGGTTCAAGCTAAA…	WP_015060105.1	subclass_B1_metallo-beta-lactamase_IMP-4	MSKLSVFFIFLFCSIATAAEPLPDLKIEKLDEGVYVHTSFEEVNGWGVVPKHGLVVLVDAEAYLIDTPFTAKDTEKLVTWFVERGYKIKGSISSHFHSDSTGGIEWLNSQSIPTYASELTNELLKKDGKVQAKNSFGGVNYWLVKNKIEVFYPGPGHTPDNLVVWLPERKILFGGCFIKPYGLGNLGDANLEAWPKSAKLLISKYGKAKLVVPSHSEAGDASLLKLTLEQAVKGLNESKKPSKLSN	ORF_OK	TRUE_HIT	kklrkllllllllllllslaaaeekeeeekdelkiekladnvyvhtsykevegvgkvssngLvvidekevvlvDtpwteeqtekLldwiekklklkvkavistHfHeDrlGGlealnkkgiktyasalTnellkkegkeqakhsfkkeekltlgkekievfypGegHtkDNiVvwlpkekiLfGGClvksaeakslGnlgdAnveeWpksvekvkakypeakiVipGHgevgdkellehTlkllekak	ESMSKLSVFFIFLFCSIATA------AEPLPDLKIEKLDEGVYVHTSFEEVNGWGVVPKHGLVVLVDAEAYLIDTPFTAKDTEKLVTWFVE-RGYKIKGSISSHFHSDSTGGIEWLNSQSIPTYASELTNELLKKDGKVQAKNSFGGVNY-WLVKNKIEVFYPGPGHTPDNLVVWLPERKILFGGCFIKP---YGLGNLGDANLEAWPKSAKLLISKYGKAKLVVPSHSEAGDASLLKLTLEQAVKGL	3	250	97.6285	0	11	0	246	Cluster_663	subclass_B1_metallo-beta-lactamase_IMP-37_NG_049201.1_cds_WP_063860593.1_1	Cluster_672	SP_Sec_SPI_	18-19	SP_Sec_SPI_	18-19	H_x_H_x_D	H_x_x_D_N	C	H	.
B1_290	GCF_003050315.1	29497	29497	Vibrio_splendidus	Bacteria-Pseudomonadota-Gammaproteobacteria-Vibrionales-Vibrionaceae-Vibrio-	5341876	NZ_PIFP01000040.1	class_B1	273.4	+	146	857	123	863	ATGTACAAAATTACTTTGACGCTGTTAAATGCTGTCATTGCTTTTAGCAGTGTTGCCGATGAAAAGTCGATTAAGCCTCTTCAATTTGAAGAAATTAAGAACAACGTATTTTTAGTTAAATCATATCGTGAGTTTGTCAATTTGCAGACTCCGGGTAACCCTGTAGTGCTCGATGCAAATTCGTTGATATATATCGATGGGACGGATGCCTATCTAATTGATACTCCGTGGAATGCATCTAATATGCCTCAACTAATGGAGTGGATCGAAAGTAAGGGGTTTACGTTAAAGAAGACGGTTTTTTCTCATTTCCATGAAGATCAAACAGGTGGCTTAGAGTACCTTCAACAACACAATTTCGAAACTTACGCTTCTGGTTTAACTAATCGTTTATTGAAA…	WP_108117279.1	ALI_family_subclass_B1_metallo-beta-lactamase	MYKITLTLLNAVIAFSSVADEKSIKPLQFEEIKNNVFLVKSYREFVNLQTPGNPVVLDANSLIYIDGTDAYLIDTPWNASNMPQLMEWIESKGFTLKKTVFSHFHEDQTGGLEYLQQHNFETYASGLTNRLLKHDNKKPTNHEFSGDNFVLLENKIEVFYPGAGHSKDNVVVWMPKEKVLVGGCLMRANEVNTIGWVGDADINKWSGSAQKVLAKYPQAELVVPGHGNVGKGNSIIHHTIDIANQL	ORF_OK	TRUE_HIT	llllslaaaeekeeeekdelkiekladnvyvhtsykevegv......gkvssngLvvidekevvlvDtpwteeqtekLldwiekklklkvkavistHfHeDrlGGlealnkkgiktyasalTnellkkegkeqakhsfkkeekltlgkekievfypGegHtkDNiVvwlpkekiLfGGClvksaeakslGnlgdAnveeWpksvekvkakypeakiVipGHgevgd.kellehTlkllek	LLNAVIAFSSVADEKSIKPLQFEEIKNNVFLVKSYREFVNLqtpgnpVVLDANSLIYIDGTDAYLIDTPWNASNMPQLMEWIES-KGFTLKKTVFSHFHEDQTGGLEYLQQHNFETYASGLTNRLLKHDNKKPTNHEFSGDNF-VLLENKIEVFYPGAGHSKDNVVVWMPKEKVLVGGCLMRANEVNTIGWVGDADINKWSGSAQKVLAKYPQAELVVPGHGNVGKgNSIIHHTIDIANQ	16	248	91.6996	7	2	0	246	Cluster_729	CLUSTER_NOT_IN_NCBI_AMR_REF_DB	Cluster_734	SP_Sec_SPI_	19-20	SP_Sec_SPI_	19-20	H_x_H_x_D	H_x_x_D_N	C	H	.
B1_291	GCF_003050445.1	29497	29497	Vibrio_splendidus	Bacteria-Pseudomonadota-Gammaproteobacteria-Vibrionales-Vibrionaceae-Vibrio-	5279504	NZ_PIFT01000001.1	class_B1	269.7	-	139765	140476	139760	140500	ATGTACAAAATTACTTTGACGCTGTTAAATGCTGTCATTGCTTTTAGCAGTGTTGCCGATGAAAAGTCGATTAAGCCTCTTCAATTTGAAGAAATTAAGAACAACGTATTTTTAGTTAAATCATATCGTGAGTTTGTCAATTTGCAGACTCCGGGTAACCCTGTAGTGCTCGATGCAAATTCGTTGATATATATCGATGGGACGGATGCCTATCTAATTGATACTCCGTGGAATGCATCTAATATGCCTCAACTAATGGAGTGGATCGAAAGTAAGGGGTTTACGTTAAAGAAGACGGTTTTTTCTCATTTCCATGAAGATCAAACAGGTGGCTTAGAGTACCTTCAACAACACAATTTCGAAACTTACGCTTCTGGTTTAACTAATCGTTTATTGAAA…	WP_108117279.1	ALI_family_subclass_B1_metallo-beta-lactamase	MYKITLTLLNAVIAFSSVADEKSIKPLQFEEIKNNVFLVKSYREFVNLQTPGNPVVLDANSLIYIDGTDAYLIDTPWNASNMPQLMEWIESKGFTLKKTVFSHFHEDQTGGLEYLQQHNFETYASGLTNRLLKHDNKKPTNHEFSGDNFVLLENKIEVFYPGAGHSKDNVVVWMPKEKVLVGGCLMRANEVNTIGWVGDADINKWSGSAQKVLAKYPQAELVVPGHGNVGKGNSIIHHTIDIANQL	ORF_OK	TRUE_HIT	llllslaaaeekeeeekdelkiekladnvyvhtsykevegv......gkvssngLvvidekevvlvDtpwteeqtekLldwiekklklkvkavistHfHeDrlGGlealnkkgiktyasalTnellkkegkeqakhsfkkeekltlgkekievfypGegHtkDNiVvwlpkekiLfGGClvksaeakslGnlgdAnveeWpksvekvkakypeakiVipGHgevgd.kellehTlkllek	LLNAVIAFSSVADEKSIKPLQFEEIKNNVFLVKSYREFVNLqtpgnpVVLDANSLIYIDGTDAYLIDTPWNASNMPQLMEWIES-KGFTLKKTVFSHFHEDQTGGLEYLQQHNFETYASGLTNRLLKHDNKKPTNHEFSGDNF-VLLENKIEVFYPGAGHSKDNVVVWMPKEKVLVGGCLMRANEVNTIGWVGDADINKWSGSAQKVLAKYPQAELVVPGHGNVGKgNSIIHHTIDIANQ	16	248	91.6996	7	2	0	246	Cluster_729	CLUSTER_NOT_IN_NCBI_AMR_REF_DB	Cluster_734	SP_Sec_SPI_	19-20	SP_Sec_SPI_	19-20	H_x_H_x_D	H_x_x_D_N	C	H	.
B1_292	GCF_003051945.2	158836	158836	Enterobacter_hormaechei	Bacteria-Pseudomonadota-Gammaproteobacteria-Enterobacterales-Enterobacteriaceae-Enterobacter-Enterobacter_cloacae_complex-	5149962	NZ_CP028536.2	class_B1	269.3	+	35801	36569	35766	36578	ATGGAATTGCCCAATATTATGCACCCGGTCGCGAAGCTGAGCACCGCATTAGCCGCTGCATTGATGCTGAGCGGGTGCATGCCCGGTGAAATCCGCCCGACGATTGGCCAGCAAATGGAAACTGGCGACCAACGGTTTGGCGATCTGGTTTTCCGCCAGCTCGCACCGAATGTCTGGCAGCACACTTCCTATCTCGACATGCCGGGTTTCGGGGCAGTCGCTTCCAACGGTTTGATCGTCAGGGATGGCGGCCGCGTGCTGTTGGTCGATACCGCCTGGACCGATGACCAGACCGCCCAGATCCTCAACTGGATCAAGCAGGAGATCAACCTGCCGGTCGCGCTGGCGGTGGTGACTCACGCGCATCAGGACAAGATGGGCGGTATGGACGCGCTGCAT…	WP_023408309.1	subclass_B1_metallo-beta-lactamase_NDM-5	MELPNIMHPVAKLSTALAAALMLSGCMPGEIRPTIGQQMETGDQRFGDLVFRQLAPNVWQHTSYLDMPGFGAVASNGLIVRDGGRVLLVDTAWTDDQTAQILNWIKQEINLPVALAVVTHAHQDKMGGMDALHAAGIATYANALSNQLAPQEGLVAAQHSLTFAANGWVEPATAPNFGPLKVFYPGPGHTSDNITVGIDGTDIAFGGCLIKDSKAKSLGNLGDADTEHYAASARAFGAAFPKASMIVMSHSAPDSRAAITHTARMADKLR	ORF_OK	TRUE_HIT	kllllllllllllslaaa.........eekeeeekdelkiekladnvyvhtsykevegvgkvssngLvvidekevvlvDtpwteeqtekLldwiekklklkvkavistHfHeDrlGGlealnkkgiktyasalTnellkkegkeqakhsfkkeek......ltlgkekievfypGegHtkDNiVvwlpkekiLfGGClvksaeakslGnlgdAnveeWpksvekvkakypeakiVipGHgevgdkellehTlkllek	KLSTALAAALMLSGCMPGeirptigqqMETGDQRFGDLVFRQLAPNVWQHTSYLDMPGFGAVASNGLIVRDGGRVLLVDTAWTDDQTAQILNWIKQEINLPVALAVVTHAHQDKMGGMDALHAAGIATYANALSNQLAPQEGLVAAQHSLTFAANgwvepaTAPNFGPLKVFYPGPGHTSDNITVGIDGTDIAFGGCLIKDSKAKSLGNLGDADTEHYAASARAFGAAFPKASMIVMSHSAPDSRAAITHTARMADK	7	248	95.2569	15	0	0	270	Cluster_118	subclass_B1_metallo-beta-lactamase_NDM-18_NG_052866.1_cds_WP_077064890.1_1	Cluster_120	LIPO_Sec_SPII_	25-26	LIPO_Sec_SPII_	25-26	H_x_H_x_D	H_x_x_D_N	C	H	.
B1_293	GCF_003051985.2	562	562	Escherichia_coli	Bacteria-Pseudomonadota-Gammaproteobacteria-Enterobacterales-Enterobacteriaceae-Escherichia-	4972505	NZ_CP028577.1	class_B1	269.3	+	15729	16497	15694	16506	ATGGAATTGCCCAATATTATGCACCCGGTCGCGAAGCTGAGCACCGCATTAGCCGCTGCATTGATGCTGAGCGGGTGCATGCCCGGTGAAATCCGCCCGACGATTGGCCAGCAAATGGAAACTGGCGACCAACGGTTTGGCGATCTGGTTTTCCGCCAGCTCGCACCGAATGTCTGGCAGCACACTTCCTATCTCGACATGCCGGGTTTCGGGGCAGTCGCTTCCAACGGTTTGATCGTCAGGGATGGCGGCCGCGTGCTGTTGGTCGATACCGCCTGGACCGATGACCAGACCGCCCAGATCCTCAACTGGATCAAGCAGGAGATCAACCTGCCGGTCGCGCTGGCGGTGGTGACTCACGCGCATCAGGACAAGATGGGCGGTATGGACGCGCTGCAT…	WP_023408309.1	subclass_B1_metallo-beta-lactamase_NDM-5	MELPNIMHPVAKLSTALAAALMLSGCMPGEIRPTIGQQMETGDQRFGDLVFRQLAPNVWQHTSYLDMPGFGAVASNGLIVRDGGRVLLVDTAWTDDQTAQILNWIKQEINLPVALAVVTHAHQDKMGGMDALHAAGIATYANALSNQLAPQEGLVAAQHSLTFAANGWVEPATAPNFGPLKVFYPGPGHTSDNITVGIDGTDIAFGGCLIKDSKAKSLGNLGDADTEHYAASARAFGAAFPKASMIVMSHSAPDSRAAITHTARMADKLR	ORF_OK	TRUE_HIT	kllllllllllllslaaa.........eekeeeekdelkiekladnvyvhtsykevegvgkvssngLvvidekevvlvDtpwteeqtekLldwiekklklkvkavistHfHeDrlGGlealnkkgiktyasalTnellkkegkeqakhsfkkeek......ltlgkekievfypGegHtkDNiVvwlpkekiLfGGClvksaeakslGnlgdAnveeWpksvekvkakypeakiVipGHgevgdkellehTlkllek	KLSTALAAALMLSGCMPGeirptigqqMETGDQRFGDLVFRQLAPNVWQHTSYLDMPGFGAVASNGLIVRDGGRVLLVDTAWTDDQTAQILNWIKQEINLPVALAVVTHAHQDKMGGMDALHAAGIATYANALSNQLAPQEGLVAAQHSLTFAANgwvepaTAPNFGPLKVFYPGPGHTSDNITVGIDGTDIAFGGCLIKDSKAKSLGNLGDADTEHYAASARAFGAAFPKASMIVMSHSAPDSRAAITHTARMADK	7	248	95.2569	15	0	0	270	Cluster_118	subclass_B1_metallo-beta-lactamase_NDM-18_NG_052866.1_cds_WP_077064890.1_1	Cluster_120	LIPO_Sec_SPII_	25-26	LIPO_Sec_SPII_	25-26	H_x_H_x_D	H_x_x_D_N	C	H	.
B1_294	GCF_003054055.1	1649266	1649266	Pontibacter_mucosus	Bacteria-FCB_group-Bacteroidota_Chlorobiota_group-Bacteroidota-Cytophagia-Cytophagales-Hymenobacteraceae-Pontibacter-	5231950	NZ_QBKI01000001.1	class_B1	286.6	+	236654	237362	236646	237368	ATGAAGCGATTACTGTATTTTATACTTTGCCTGCTCCTGCTGATGCCCGCTTATACGTTGCAGGCGCAACAGCAGGAGATAAAGGTAACCAAGCTAGCGCCTAACGTATGGGTGCATACCTCCTATAGCACGTATCAGGGCGTTTCAGTCCCCTCGCATGGATTGGTGGTTGCTACCAAAGAGGGCGCGGTGCTGGTGGATACCGGCTGGGGCAACGAACCCACCGAGCAGCTGCTGGCCTGGGTAAAAACCAACCTGAAGCAGCCGGTAAAAGTATGCCTGCCCACCCACTGGCACGACGATAAGATAGGCGGCATGAAAGTGGTGCAGCAGCAGGGCATTCCGGTGGTTACTTCTGCGCTGACGGCCATACTTGCCGCTGAAAATGGCAAAGGCACC…	WP_108209966.1	subclass_B1_metallo-beta-lactamase	MKRLLYFILCLLLLMPAYTLQAQQQEIKVTKLAPNVWVHTSYSTYQGVSVPSHGLVVATKEGAVLVDTGWGNEPTEQLLAWVKTNLKQPVKVCLPTHWHDDKIGGMKVVQQQGIPVVTSALTAILAAENGKGTPDVTFATDTTFTIGVQQFEVYFPGGGHTLDNVVVYLPQQKILFGGCLVKDLQATTLGNTADADLKSWPFAIQNLQQRYPKAKTVVPSHGPWGDKALLSHTLELLQKR	ORF_OK	TRUE_HIT	kllllllllllllslaaaeekeeeekdelkiekladnvyvhtsykevegvgkvssngLvvidekevvlvDtpwteeqtekLldwiekklklkvkavistHfHeDrlGGlealnkkgiktyasalTnellkkegkeqakhsfkkeekltlgkekievfypGegHtkDNiVvwlpkekiLfGGClvksaeakslGnlgdAnveeWpksvekvkakypeakiVipGHgevgdkellehTlkllek	R---LLYFILCLLLLMPA-YTLQAQQQEIKVTKLAPNVWVHTSYSTYQGV-SVPSHGLVVATKEGAVLVDTGWGNEPTEQLLAWVKTNLKQPVKVCLPTHWHDDKIGGMKVVQQQGIPVVTSALTAILAAENGKGTPDVTFATDTTFTIGVQQFEVYFPGGGHTLDNVVVYLPQQKILFGGCLVKDLQATTLGNTADADLKSWPFAIQNLQQRYPKAKTVVPSHGPWGDKALLSHTLELLQK	7	248	95.2569	0	5	0	240	Cluster_999	CLUSTER_NOT_IN_NCBI_AMR_REF_DB	Cluster_990	SP_Sec_SPI_	22-23	SP_Sec_SPI_	22-23	H_x_H_x_D	H_x_x_D_N	C	H	.
B1_295	GCF_003054385.1	573	573	Klebsiella_pneumoniae	Bacteria-Pseudomonadota-Gammaproteobacteria-Enterobacterales-Enterobacteriaceae-Klebsiella_Raoultella_group-Klebsiella-	5579775	NZ_CP028718.1	class_B1	268.8	-	41435	42203	41427	42239	ATGGAATTGCCCAATATTATGCACCCGGTCGCGAAGCTGAGCACCGCATTAGCCGCTGCATTGATGCTGAGCGGGTGCATGCCCGGTGAAATCCGCCCGACGATTGGCCAGCAAATGGAAACTGGCGACCAACGGTTTGGCGATCTGGTTTTCCGCCAGCTCGCACCGAATGTCTGGCAGCACACTTCCTATCTCGACATGCCGGGTTTCGGGGCAGTCGCTTCCAACGGTTTGATCGTCAGGGATGGCGGCCGCGTGCTGGTGGTCGATACCGCCTGGACCGATGACCAGACCGCCCAGATCCTCAACTGGATCAAGCAGGAGATCAACCTGCCGGTCGCGCTGGCGGTGGTGACTCACGCGCATCAGGACAAGATGGGCGGTATGAACGCGCTGCAT…	WP_094009810.1	subclass_B1_metallo-beta-lactamase_NDM-19	MELPNIMHPVAKLSTALAAALMLSGCMPGEIRPTIGQQMETGDQRFGDLVFRQLAPNVWQHTSYLDMPGFGAVASNGLIVRDGGRVLVVDTAWTDDQTAQILNWIKQEINLPVALAVVTHAHQDKMGGMNALHAAGIATYANALSNQLAPQEGLVAAQHSLTFAANGWVEPATAPNFGPLKVFYPGPGHTSDNITVGIDGTDIAFGGCLIKDSKAKSLGNLGDADTEHYAASVRAFGAAFPKASMIVMSHSAPDSRAAITHTARMADKLR	ORF_OK	TRUE_HIT	kllllllllllllslaaa.........eekeeeekdelkiekladnvyvhtsykevegvgkvssngLvvidekevvlvDtpwteeqtekLldwiekklklkvkavistHfHeDrlGGlealnkkgiktyasalTnellkkegkeqakhsfkkeek......ltlgkekievfypGegHtkDNiVvwlpkekiLfGGClvksaeakslGnlgdAnveeWpksvekvkakypeakiVipGHgevgdkellehTlkllek	KLSTALAAALMLSGCMPGeirptigqqMETGDQRFGDLVFRQLAPNVWQHTSYLDMPGFGAVASNGLIVRDGGRVLVVDTAWTDDQTAQILNWIKQEINLPVALAVVTHAHQDKMGGMNALHAAGIATYANALSNQLAPQEGLVAAQHSLTFAANgwvepaTAPNFGPLKVFYPGPGHTSDNITVGIDGTDIAFGGCLIKDSKAKSLGNLGDADTEHYAASVRAFGAAFPKASMIVMSHSAPDSRAAITHTARMADK	7	248	95.2569	15	0	0	270	Cluster_118	subclass_B1_metallo-beta-lactamase_NDM-18_NG_052866.1_cds_WP_077064890.1_1	Cluster_120	LIPO_Sec_SPII_	25-26	LIPO_Sec_SPII_	25-26	H_x_H_x_D	H_x_x_D_N	C	H	.
B1_296	GCF_003054785.2	1428	1428	Bacillus_thuringiensis	Bacteria-Terrabacteria_group-Bacillota-Bacilli-Bacillales-Bacillaceae-Bacillus-Bacillus_cereus_group-	6133281	NZ_CP044978.1	class_B1	272.7	-	4155875	4156580	4155873	4156646	ATGAAAAAGAATACGTTGTTAAAAGTAGGATTATGTGTAAGTTTACTAGGAACAACTCAATTTGTTAGCACGATTTCTTCTGTACAAGCATCACAAAAGGTAGAGCAAACAGTAATTAAAAATGAGACGGGAACCATTTCAATATCTCAGTTAAACAAGAATGTATGGGTTCATACGGAGTTAGGTTATTTTAATGGAGAAGCAGTTCCTTCGAACGGTCTAGTTCTTAATACTTCTAAAGGGTTAGTACTTGTTGATTCTTCTTGGGATGATAAATTAACGAAGGAACTAATAGAAATGGTAGAAAAGAAATTTCAGAAGCGCGTAACAGATGTCGTTATTACACATGCGCACGCTGATCGAATTGGCGGAATAAAAACGTTGAAAGAAAGAGGCATT…	WP_095690445.1	BcII_family_subclass_B1_metallo-beta-lactamase	MKKNTLLKVGLCVSLLGTTQFVSTISSVQASQKVEQTVIKNETGTISISQLNKNVWVHTELGYFNGEAVPSNGLVLNTSKGLVLVDSSWDDKLTKELIEMVEKKFQKRVTDVVITHAHADRIGGIKTLKERGIKAHSTALTAELAKNSGYEEPLGDLQTITSLKFGNTKVETFYPGKGHTEDNIVVWLPQYQILAGGCLVKSAEAKDLGNVADAYVNEWSTSIENVLKRYGNINSVVPGHGEVGDKGLLLHTLDLLK	ORF_OK	TRUE_HIT	lslaaa........eekeeeekdelkiekladnvyvhtsykevegvgkvssngLvvidekevvlvDtpwteeqtekLldwiekklklkvkavistHfHeDrlGGlealnkkgiktyasalTnellkkegkeqakhsfkkeekltlgkekievfypGegHtkDNiVvwlpkekiLfGGClvksaeakslGnlgdAnveeWpksvekvkakypeakiVipGHgevgdkellehTlklle	VSTISSvqasqkveQTVIKNETGTISISQLNKNVWVHTELGYFNGE-AVPSNGLVLNTSKGLVLVDSSWDDKLTKELIEMVEKKFQKRVTDVVITHAHADRIGGIKTLKERGIKAHSTALTAELAKNSGYEEPLGDLQTITSLKFGNTKVETFYPGKGHTEDNIVVWLPQYQILAGGCLVKSAEAKDLGNVADAYVNEWSTSIENVLKRYGNINSVVPGHGEVGDKGLLLHTLDLLK	19	247	90.1186	8	1	0	257	Cluster_137	BcII_family_subclass_B1_metallo-beta-lactamase_NG_047224.1_cds_WP_012261328.1_1	Cluster_139	SP_Sec_SPI_	30-31	SP_Sec_SPI_	30-31	H_x_H_x_D	H_x_x_D_N	C	H	.
B1_297	GCF_003058025.1	492670	492670	Bacillus_velezensis	Bacteria-Terrabacteria_group-Bacillota-Bacilli-Bacillales-Bacillaceae-Bacillus-Bacillus_subtilis_group-Bacillus_amyloliquefaciens_group-	4178597	NZ_KZ790934.1	class_B1	223.7	-	3363978	3364647	3363973	3364662	ATGAAACCGGCAGACGCTGCGGAGGGCTTCGCAGCAAAAGGTGTCACTCTCACACAGCTGGCGCCGCATGTTTGGATGCATACAAGCACCGGTACGGCAGACGGAAGTCCCGTCCCTGCGAACGGATTGCTTCTTGAGACTTCCAAAGGAATCGTACTGATTGATACTCCGTGGAATGACAGTCTCACAGAGCAATTAATGACACAAATAAAAAAGCGGTTTCCCGGCAAAAGGATGACCGTTGCCATTGTGACACACGCCCATGATGATCGTATCGGCGGGCTGAACACCCTGTACAAATACGGCGTAAAGGTGCACAGCACGAAGCTGACCGCCGACTTCGCTCGAGAGCAGGGATATGACCGGCCGCTCGGAGATTTGAAAAACGTGACAAAGCTG…	WP_031304452.1	subclass_B1_metallo-beta-lactamase	MKPADAAEGFAAKGVTLTQLAPHVWMHTSTGTADGSPVPANGLLLETSKGIVLIDTPWNDSLTEQLMTQIKKRFPGKRMTVAIVTHAHDDRIGGLNTLYKYGVKVHSTKLTADFAREQGYDRPLGDLKNVTKLQFGDMKIETFYPGKGHTEDNMTVWLPEEKLLFGGCLIKALETKEIVPTPGFYPDKWPRAVRKVMKRYQDISIVVPGHGSPGDDRLLPHTISLLKET	ORF_OK	TRUE_HIT	eekeeeekdelkiekladnvyvhtsykevegvgkvssngLvvidekevvlvDtpwteeqtekLldwiekkl.klkvkavistHfHeDrlGGlealnkkgiktyasalTnellkkegkeqakhsfkkeekltlgkekievfypGegHtkDNiVvwlpkekiLfGGClvksaeakslGnlgdAnveeWpksvekvkakypeakiVipGHgevgdkellehTlkllek	DAAEGFAAKGVTLTQLAPHVWMHTSTGTADGS-PVPANGLLLETSKGIVLIDTPWNDSLTEQLMTQIKKRFpGKRMTVAIVTHAHDDRIGGLNTLYKYGVKVHSTKLTADFAREQGYDRPLGDLKNVTKLQFGDMKIETFYPGKGHTEDNMTVWLPEEKLLFGGCLIKALETKEIVPTPGFYPDKWPRAVRKVMKRYQDISIVVPGHGSPGDDRLLPHTISLLKE	25	248	88.1423	1	1	0	229	Cluster_1171	CLUSTER_NOT_IN_NCBI_AMR_REF_DB	Cluster_1151	OTHER	0	OTHER	0	H_x_H_x_D	H_x_x_D_N	C	H	.
B1_298	GCF_003058195.1	2135667	2135667	Elizabethkingia_sp_YR214	Bacteria-FCB_group-Bacteroidota_Chlorobiota_group-Bacteroidota-Flavobacteriia-Flavobacteriales-Weeksellaceae-Elizabethkingia-unclassified_Elizabethkingia-	4048577	NZ_QBUH01000004.1	class_B1	282.1	+	37782	38499	37768	38517	ATGATGAAAAGATTAAAAGGGGTATTGGTTCTGGCTTTAGGATTTACAGGACTACAGGTTTTTGGACAACAAAATCCTGATATTAAAATTGAAAAATTAAAAGAAAATTTATACGTTTATACAACCTATAATACATTCAAAGGAACTAAATATGCAGCTAATGCGGTATATATGGTAACTGATAAAGGAGTAGTGGTTATAGATTCTCCATGGGGAGAAGATAAATTTAAAAGTTTTACAGACGAGATTTATAAAAAACACGGAAAGAAAGTCATCATGAACATTGCTACTCATTCTCATGATGATAGAGCCGGAGGTTTTGAATATTTTGGTAAACTAGGTGCAAAAACTTATTCTACTAAAATGACAGACTCTATTTTAGCAAAAGAGAATAAGCCA…	WP_107808007.1	subclass_B1_metallo-beta-lactamase_BlaB-28	MMKRLKGVLVLALGFTGLQVFGQQNPDIKIEKLKENLYVYTTYNTFKGTKYAANAVYMVTDKGVVVIDSPWGEDKFKSFTDEIYKKHGKKVIMNIATHSHDDRAGGFEYFGKLGAKTYSTKMTDSILAKENKPRAQYTFDNNKSFKVGKTEFQVYYPGKGHTADNVVVWFPKDKVLVGGCIVKSGDSKDLGFIGEAYVNDWTQSIHNIQQKFPDVQYVVAGHDDWKDQTSIQHTLDLISEYQQKQKASN	ORF_OK	TRUE_HIT	llllllllllllslaaaeekeeeekdelkiekladnvyvhtsykevegvgkvssngLvvidekevvlvDtpwteeqtekLldwiekklklkvkavistHfHeDrlGGlealnkkgiktyasalTnellkkegkeqakhsfkkeekltlgkekievfypGegHtkDNiVvwlpkekiLfGGClvksaeakslGnlgdAnveeWpksvekvkakypeakiVipGHgevgdkellehTlkllekakkk	LKGVLVLALGFTGL----QVFGQQNPDIKIEKLKENLYVYTTYNTFKGT-KYAANAVYMVTDKGVVVIDSPWGEDKFKSFTDEIYKKHGKKVIMNIATHSHDDRAGGFEYFGKLGAKTYSTKMTDSILAKENKPRAQYTFDNNKSFKVGKTEFQVYYPGKGHTADNVVVWFPKDKVLVGGCIVKSGDSKDLGFIGEAYVNDWTQSIHNIQQKFPDVQYVVAGHDDWKDQTSIQHTLDLISEYQQK	8	252	96.4427	0	5	0	249	Cluster_590	BlaB_family_subclass_B1_metallo-beta-lactamase_NG_047491.1_cds_WP_063842622.1_1	Cluster_593	SP_Sec_SPI_	22-23	SP_Sec_SPI_	22-23	H_x_H_x_D	H_x_x_D_N	C	H	.
B1_299	GCF_003058195.1	2135667	2135667	Elizabethkingia_sp_YR214	Bacteria-FCB_group-Bacteroidota_Chlorobiota_group-Bacteroidota-Flavobacteriia-Flavobacteriales-Weeksellaceae-Elizabethkingia-unclassified_Elizabethkingia-	4048577	NZ_QBUH01000005.1	class_B1	272.5	-	107423	108134	107418	108137	ATGAAAAAAAGCATTCAGTTTTTTATTGTTTCGATTCTCCTAAGTTCTTTTGCACATGCTCAGATAAGGGATTTTGTTATTGAACCTCCAATTAAACCTAATCTATATATCTACAAAACTTTTGGAGTATTTGGAGGTAAAGAGTATTCTACAAATGCAGTGTATCTCATTACAAAAAAGGGTGTCGTTTTATTTGATGTGCCTTGGCAGAAAACACAATATCAAAGCCTTATGGATACTATAAAAAAACGTCATAATCTACCTGTTATTGCTGTGTTTGCTACTCATTCACATGCTGACCGTGCAGGTGATTTGAGTTTTTACAATAAAAAAGGAATTAAAACCTATGCTACTCTGAAAACGAATGAACTGCTGAAGAAAGAAGGGAAGGCAACGTCA…	WP_107808422.1	IND_family_subclass_B1_metallo-beta-lactamase	MKKSIQFFIVSILLSSFAHAQIRDFVIEPPIKPNLYIYKTFGVFGGKEYSTNAVYLITKKGVVLFDVPWQKTQYQSLMDTIKKRHNLPVIAVFATHSHADRAGDLSFYNKKGIKTYATLKTNELLKKEGKATSSEIIKIGKPYRIGGEEFIVDFLGEGHTVDNVVVWFPKYNILDGGCLVKSNAAVDLGYTGEANVKQWPQTMAKLKTRYSQATLIIPGHDEWKGGGHVEHTLELLNKK	ORF_OK	TRUE_HIT	lrkllllllllllllslaaaeekeeeekdelkiekladnvyvhtsykevegvgkvssngLvvidekevvlvDtpwteeqtekLldwiekklklkvkavistHfHeDrlGGlealnkkgiktyasalTnellkkegkeqakhsfkkeekltlgkekievfypGegHtkDNiVvwlpkekiLfGGClvksaeakslGnlgdAnveeWpksvekvkakypeakiVipGHgevgdkellehTlkllek	MKKSIQFFIVSILLSSF-----AHAQIRDFVIEPPIKPNLYIYKTFGVFGGK-EYSTNAVYLITKKGVVLFDVPWQKTQYQSLMDTIKKRHNLPVIAVFATHSHADRAGDLSFYNKKGIKTYATLKTNELLKKEGKATSSEIIKIGKPYRIGGEEFIVDFLGEGHTVDNVVVWFPKYNILDGGCLVKSNAAVDLGYTGEANVKQWPQTMAKLKTRYSQATLIIPGHDEWKGGGHVEHTLELLNK	5	248	96.0474	0	6	0	239	Cluster_751	IND_family_subclass_B1_metallo-beta-lactamase_CGB-1_NG_051689.1_cds_WP_002979282.1_1	Cluster_755	SP_Sec_SPI_	20-21	SP_Sec_SPI_	20-21	H_x_H_x_D	H_x_x_D_N	C	H	.
B1_3	GCF_002837395.1	2056493	2056493	Bacillus_sp_SN10	Bacteria-Terrabacteria_group-Bacillota-Bacilli-Bacillales-Bacillaceae-Bacillus-unclassified_Bacillus_in_firmicutes-	5542115	NZ_PJCU01000003.1	class_B1	275	+	296161	296869	296099	296872	ATGAAAAAGAATACATTATTAAAATTAGGGGTATTTGTTAGTTTACTAGGAACAACTCAATTTGTTAGTGCAACTTCTTCTGTAAAAGCGGAACAAAAGCTAGAGAAAAAAGTAATAAAAAATGAGACAGGAACTATTTCAATTTCTCAGTTAAACAAAAATGTATGGGTTCATACGGAGTTAGGTTATTTTAACGGAGAAGCAGTTCCTTCGAACGGTTTAGTTCTTACTACTTCAAAGGGGTTAGTACTTGTCGATTCTTCTTGGGATGATAAGTTAACGAAGGAATTAATAGAGATGGTAGAAAAGAAATTTAAGAAGCGTGTAACAGATGTCATTATTACACATGCGCACGCCGATCGAATTGGCGGAATAAAAACGTTGAAAGAAAGAGGCATT…	WP_101166562.1	BcII_family_subclass_B1_metallo-beta-lactamase	MKKNTLLKLGVFVSLLGTTQFVSATSSVKAEQKLEKKVIKNETGTISISQLNKNVWVHTELGYFNGEAVPSNGLVLTTSKGLVLVDSSWDDKLTKELIEMVEKKFKKRVTDVIITHAHADRIGGIKTLKERGIKAHSTALTAGLAKENGYEEPLGDLQTITNLKFGNMKVETFYPGKGHTEDNIVVWLPQYNMLAGGCLVKSAEAKDLGNVSDAYINEWSTSIENVLTRYRNINAVVPGHGEVGDRGLLLHTLDLLK	ORF_OK	TRUE_HIT	llslaaa...........eekeeeekdelkiekladnvyvhtsykevegvgkvssngLvvidekevvlvDtpwteeqtekLldwiekklklkvkavistHfHeDrlGGlealnkkgiktyasalTnellkkegkeqakhsfkkeekltlgkekievfypGegHtkDNiVvwlpkekiLfGGClvksaeakslGnlgdAnveeWpksvekvkakypeakiVipGHgevgdkellehTlklle	FVS---AtssvkaeqkleKKVIKNETGTISISQLNKNVWVHTELGYFNGE-AVPSNGLVLTTSKGLVLVDSSWDDKLTKELIEMVEKKFKKRVTDVIITHAHADRIGGIKTLKERGIKAHSTALTAGLAKENGYEEPLGDLQTITNLKFGNMKVETFYPGKGHTEDNIVVWLPQYNMLAGGCLVKSAEAKDLGNVSDAYINEWSTSIENVLTRYRNINAVVPGHGEVGDRGLLLHTLDLLK	18	247	90.5138	11	4	0	257	Cluster_137	BcII_family_subclass_B1_metallo-beta-lactamase_NG_047224.1_cds_WP_012261328.1_1	Cluster_139	SP_Sec_SPI_	30-31	SP_Sec_SPI_	30-31	H_x_H_x_D	H_x_x_D_N	C	H	.
B1_30	GCF_002852945.3	72407	573	Klebsiella_pneumoniae_subsp_pneumoniae	Bacteria-Pseudomonadota-Gammaproteobacteria-Enterobacterales-Enterobacteriaceae-Klebsiella_Raoultella_group-Klebsiella-	5653527	NZ_CP028781.2	class_B1	267.4	+	127037	127805	127002	127814	ATGGAATTGCCCAATATTATGCACCCGGTCGCGAAGCTGAGCACCGCATTAGCCGCTGCATTGATGCTGAGCGGGTGCATGCCCGGTGAAATCCGCCCGACGATTGGCCAGCAAATGGAAACTGGCGACCAACGGTTTGGCGATCTGGTTTTCCGCCAGCTCGCACCGAATGTCTGGCAGCACACTTCCTATCTCGACATGCCGGGTTTCGGGGCAGTCGCTTCCAACGGTTTGATCGTCAGGGATGGCGGCCGCGTGCTGTTGGTCGATACCGCCTGGACCGATGACCAGACCGCCCAGATCCTCAACTGGATCAAGCAGGAGATCAACCTGCCGGTCGCGCTGGCGGTGGTGACTCACGCGCATCAGGACAAGATGGGCGGTATGGACGCGCTGCAT…	WP_023408309.1	subclass_B1_metallo-beta-lactamase_NDM-5	MELPNIMHPVAKLSTALAAALMLSGCMPGEIRPTIGQQMETGDQRFGDLVFRQLAPNVWQHTSYLDMPGFGAVASNGLIVRDGGRVLLVDTAWTDDQTAQILNWIKQEINLPVALAVVTHAHQDKMGGMDALHAAGIATYANALSNQLAPQEGLVAAQHSLTFAANGWVEPATAPNFGPLKVFYPGPGHTSDNITVGIDGTDIAFGGCLIKDSKAKSLGNLGDADTEHYAASARAFGAAFPKASMIVMSHSAPDSRAAITHTARMADKLR	ORF_OK	TRUE_HIT	kllllllllllllslaaa.........eekeeeekdelkiekladnvyvhtsykevegvgkvssngLvvidekevvlvDtpwteeqtekLldwiekklklkvkavistHfHeDrlGGlealnkkgiktyasalTnellkkegkeqakhsfkkeek......ltlgkekievfypGegHtkDNiVvwlpkekiLfGGClvksaeakslGnlgdAnveeWpksvekvkakypeakiVipGHgevgdkellehTlkllek	KLSTALAAALMLSGCMPGeirptigqqMETGDQRFGDLVFRQLAPNVWQHTSYLDMPGFGAVASNGLIVRDGGRVLLVDTAWTDDQTAQILNWIKQEINLPVALAVVTHAHQDKMGGMDALHAAGIATYANALSNQLAPQEGLVAAQHSLTFAANgwvepaTAPNFGPLKVFYPGPGHTSDNITVGIDGTDIAFGGCLIKDSKAKSLGNLGDADTEHYAASARAFGAAFPKASMIVMSHSAPDSRAAITHTARMADK	7	248	95.2569	15	0	0	270	Cluster_118	subclass_B1_metallo-beta-lactamase_NDM-18_NG_052866.1_cds_WP_077064890.1_1	Cluster_120	LIPO_Sec_SPII_	25-26	LIPO_Sec_SPII_	25-26	H_x_H_x_D	H_x_x_D_N	C	H	.
B1_300	GCF_003058265.1	2169401	2169401	Flagellimonas_amoyensis	Bacteria-FCB_group-Bacteroidota_Chlorobiota_group-Bacteroidota-Flavobacteriia-Flavobacteriales-Flavobacteriaceae-Flagellimonas-	4095960	NZ_QBUK01000001.1	class_B1	251.9	-	439348	440071	439343	440071	ATGAAAAAATGGGCGCTTCCCTTGCTAGTTGCCCTTATCCTATTTTCGTGCGGTAAGAAGGAAAGGCAGATAACCCTTAAAACGGATACACTGGAGATTGTACAGCTCTCGGAACACACTTATGTCCATATCTCTTACTTGGAGACCGAAAGTTTCGGAAAAGTGTCCTGTAATGGGATGATTGTACTGGATGATGGAGAGGCCGTGGTACTGGATACCCCAGTGGACGATGCGGTTTCCAAAGAACTCTTGGGTTGGTTGGAGATACAGCATGTTTCGGTAAAAGCGGTTGTGGCCACCCATTTTCACGATGATTGCCTTGGTGGGTTGCGCACCTTTCATGAAAAGGGGATTGCTTCGTATGCCCACCAAAAGACGATTGGATTGCTTCCCGAAAAA…	WP_108422683.1	subclass_B1_metallo-beta-lactamase	MKKWALPLLVALILFSCGKKERQITLKTDTLEIVQLSEHTYVHISYLETESFGKVSCNGMIVLDDGEAVVLDTPVDDAVSKELLGWLEIQHVSVKAVVATHFHDDCLGGLRTFHEKGIASYAHQKTIGLLPEKEGERPQNGFTGLTEIGVGDKKVLLDFVGEGHTPDNIIAYFPYEDVMFGGCLIKSIGASKGFLGDANVAEWSQTVSDIKSKYPNAAIVVPGHGESGNSELLDYTIGLFKD	ORF_OK	TRUE_HIT	klrkllllllllllllslaaaeekeeeekdelkiekladnvyvhtsykevegvgkvssngLvvidekevvlvDtpwteeqtekLldwiekklklkvkavistHfHeDrlGGlealnkkgiktyasalTnellkkegkeqakhsfkkeekltlgkekievfypGegHtkDNiVvwlpkekiLfGGClvksaeakslGnlgdAnveeWpksvekvkakypeakiVipGHgevgdkellehTlklle	SMKKWALPLLVALILFSCGKKERQITLKTDTLEIVQLSEHTYVHISYLETESFGKVSCNGMIVLDDGEAVVLDTPVDDAVSKELLGWLEI-QHVSVKAVVATHFHDDCLGGLRTFHEKGIASYAHQKTIGLLPEKEGERPQNGFTGLTEIGVGDKKVLLDFVGEGHTPDNIIAYFPYEDVMFGGCLIKSIGA-SKGFLGDANVAEWSQTVSDIKSKYPNAAIVVPGHGESGNSELLDYTIGLFK	4	247	96.0474	0	2	0	242	Cluster_973	CLUSTER_NOT_IN_NCBI_AMR_REF_DB	Cluster_965	LIPO_Sec_SPII_	16-17	LIPO_Sec_SPII_	16-17	H_x_H_x_D	H_x_x_D_N	C	H	.
B1_301	GCF_003063925.1	1392	1392	Bacillus_anthracis	Bacteria-Terrabacteria_group-Bacillota-Bacilli-Bacillales-Bacillaceae-Bacillus-Bacillus_cereus_group-	5446408	NZ_QAEH01000002.1	class_B1	275	+	658074	658788	658021	658791	ATGAAAAATACATTATTAAAATTAGGGGTATGTGTTAGTTTACTAGGAATAACTCCATTTGTTAGTACAATTTCTTCTGTACAAGCAGAACGAAAGGTAGAGCATAAAGTAATAAAAAATGAGACAGGAACTATTTCAATTTCTCAGTTAAACAAAAATGTTTGGGTTCATACGGAGTTAGGTTATTTTAACGGAGAAGCAGTTCCTTCGAACGGTTTAATCCTTAATACTTCTAAAGGATTAGTACTTGTCGATTCTTCTTGGGATGATAAGTTAACGAAGGAATTAATAGAGATGGCAGAAAAGAAATTTAAGAAGAGTGTAACGGATGTTATTATTACACATGCACACGCTGATCGGATTGGTGGAATAAAAACGTTGAAAGAAAGAGGCATTAAA…	WP_000799223.1	BcII_family_subclass_B1_metallo-beta-lactamase	MKNTLLKLGVCVSLLGITPFVSTISSVQAERKVEHKVIKNETGTISISQLNKNVWVHTELGYFNGEAVPSNGLILNTSKGLVLVDSSWDDKLTKELIEMAEKKFKKSVTDVIITHAHADRIGGIKTLKERGIKAHSTTLTAELAKKNGYEEPLGDLQAITKLKFGNMKVETFYPGKGHTEDNIVVWLPQYNMLVGGCLVKSASAKDLGNITDAYVNEWSTSIENVLKRYENINFVVPGHGEVGDKGLLLHTLDLLK	ORF_OK	TRUE_HIT	llllslaaa........eekeeeekdelkiekladnvyvhtsykevegvgkvssngLvvidekevvlvDtpwteeqtekLldwiekklklkvkavistHfHeDrlGGlealnkkgiktyasalTnellkkegkeqakhsfkkeekltlgkekievfypGegHtkDNiVvwlpkekiLfGGClvksaeakslGnlgdAnveeWpksvekvkakypeakiVipGHgevgdkellehTlklle	TPFVSTISSvqaerkveHKVIKNETGTISISQLNKNVWVHTELGYFNGE-AVPSNGLILNTSKGLVLVDSSWDDKLTKELIEMAEKKFKKSVTDVIITHAHADRIGGIKTLKERGIKAHSTTLTAELAKKNGYEEPLGDLQAITKLKFGNMKVETFYPGKGHTEDNIVVWLPQYNMLVGGCLVKSASAKDLGNITDAYVNEWSTSIENVLKRYENINFVVPGHGEVGDKGLLLHTLDLLK	16	247	91.3043	8	1	0	256	Cluster_137	BcII_family_subclass_B1_metallo-beta-lactamase_NG_047224.1_cds_WP_012261328.1_1	Cluster_139	SP_Sec_SPI_	29-30	SP_Sec_SPI_	29-30	H_x_H_x_D	H_x_x_D_N	C	H	.
B1_302	GCF_003063945.1	1392	1392	Bacillus_anthracis	Bacteria-Terrabacteria_group-Bacillota-Bacilli-Bacillales-Bacillaceae-Bacillus-Bacillus_cereus_group-	5457469	NZ_QAEG01000001.1	class_B1	274.2	-	333796	334510	333794	334564	ATGAAAAATACATTATTAAAATTAGGGGTATGTGTTAGTTTACTAGGAATAACTCCATTTGTTAGTACAATTTCTTCTGTACAAGCAGAACGAAAGGTAGAGCATAAAGTAATAAAAAATGAGACAGGAACTATTTCAATTTCTCAGTTAAACAAAAATGTTTGGGTTCATACGGAGTTAGGTTATTTTAACGGAGAAGCAGTTCCTTCGAACGGTTTAATCCTTAATACTTCTAAAGGATTAGTACTTGTCGATTCTTCTTGGGATGATAAGTTAACGAAGGAATTAATAGAGATGGCAGAAAAGAAATTTAAGAAGAGTGTAACGGATGTTATTATTACACATGCACACGCTGATCGGATTGGTGGAATAAAAACGTTGAAAGAAAGAGGCATTAAA…	WP_000799223.1	BcII_family_subclass_B1_metallo-beta-lactamase	MKNTLLKLGVCVSLLGITPFVSTISSVQAERKVEHKVIKNETGTISISQLNKNVWVHTELGYFNGEAVPSNGLILNTSKGLVLVDSSWDDKLTKELIEMAEKKFKKSVTDVIITHAHADRIGGIKTLKERGIKAHSTTLTAELAKKNGYEEPLGDLQAITKLKFGNMKVETFYPGKGHTEDNIVVWLPQYNMLVGGCLVKSASAKDLGNITDAYVNEWSTSIENVLKRYENINFVVPGHGEVGDKGLLLHTLDLLK	ORF_OK	TRUE_HIT	llllslaaa........eekeeeekdelkiekladnvyvhtsykevegvgkvssngLvvidekevvlvDtpwteeqtekLldwiekklklkvkavistHfHeDrlGGlealnkkgiktyasalTnellkkegkeqakhsfkkeekltlgkekievfypGegHtkDNiVvwlpkekiLfGGClvksaeakslGnlgdAnveeWpksvekvkakypeakiVipGHgevgdkellehTlklle	TPFVSTISSvqaerkveHKVIKNETGTISISQLNKNVWVHTELGYFNGE-AVPSNGLILNTSKGLVLVDSSWDDKLTKELIEMAEKKFKKSVTDVIITHAHADRIGGIKTLKERGIKAHSTTLTAELAKKNGYEEPLGDLQAITKLKFGNMKVETFYPGKGHTEDNIVVWLPQYNMLVGGCLVKSASAKDLGNITDAYVNEWSTSIENVLKRYENINFVVPGHGEVGDKGLLLHTLDLLK	16	247	91.3043	8	1	0	256	Cluster_137	BcII_family_subclass_B1_metallo-beta-lactamase_NG_047224.1_cds_WP_012261328.1_1	Cluster_139	SP_Sec_SPI_	29-30	SP_Sec_SPI_	29-30	H_x_H_x_D	H_x_x_D_N	C	H	.
B1_303	GCF_003063965.1	1392	1392	Bacillus_anthracis	Bacteria-Terrabacteria_group-Bacillota-Bacilli-Bacillales-Bacillaceae-Bacillus-Bacillus_cereus_group-	5458450	NZ_QAEI01000001.1	class_B1	274.2	-	333864	334578	333862	334632	ATGAAAAATACATTATTAAAATTAGGGGTATGTGTTAGTTTACTAGGAATAACTCCATTTGTTAGTACAATTTCTTCTGTACAAGCAGAACGAAAGGTAGAGCATAAAGTAATAAAAAATGAGACAGGAACTATTTCAATTTCTCAGTTAAACAAAAATGTTTGGGTTCATACGGAGTTAGGTTATTTTAACGGAGAAGCAGTTCCTTCGAACGGTTTAATCCTTAATACTTCTAAAGGATTAGTACTTGTCGATTCTTCTTGGGATGATAAGTTAACGAAGGAATTAATAGAGATGGCAGAAAAGAAATTTAAGAAGAGTGTAACGGATGTTATTATTACACATGCACACGCTGATCGGATTGGTGGAATAAAAACGTTGAAAGAAAGAGGCATTAAA…	WP_000799223.1	BcII_family_subclass_B1_metallo-beta-lactamase	MKNTLLKLGVCVSLLGITPFVSTISSVQAERKVEHKVIKNETGTISISQLNKNVWVHTELGYFNGEAVPSNGLILNTSKGLVLVDSSWDDKLTKELIEMAEKKFKKSVTDVIITHAHADRIGGIKTLKERGIKAHSTTLTAELAKKNGYEEPLGDLQAITKLKFGNMKVETFYPGKGHTEDNIVVWLPQYNMLVGGCLVKSASAKDLGNITDAYVNEWSTSIENVLKRYENINFVVPGHGEVGDKGLLLHTLDLLK	ORF_OK	TRUE_HIT	llllslaaa........eekeeeekdelkiekladnvyvhtsykevegvgkvssngLvvidekevvlvDtpwteeqtekLldwiekklklkvkavistHfHeDrlGGlealnkkgiktyasalTnellkkegkeqakhsfkkeekltlgkekievfypGegHtkDNiVvwlpkekiLfGGClvksaeakslGnlgdAnveeWpksvekvkakypeakiVipGHgevgdkellehTlklle	TPFVSTISSvqaerkveHKVIKNETGTISISQLNKNVWVHTELGYFNGE-AVPSNGLILNTSKGLVLVDSSWDDKLTKELIEMAEKKFKKSVTDVIITHAHADRIGGIKTLKERGIKAHSTTLTAELAKKNGYEEPLGDLQAITKLKFGNMKVETFYPGKGHTEDNIVVWLPQYNMLVGGCLVKSASAKDLGNITDAYVNEWSTSIENVLKRYENINFVVPGHGEVGDKGLLLHTLDLLK	16	247	91.3043	8	1	0	256	Cluster_137	BcII_family_subclass_B1_metallo-beta-lactamase_NG_047224.1_cds_WP_012261328.1_1	Cluster_139	SP_Sec_SPI_	29-30	SP_Sec_SPI_	29-30	H_x_H_x_D	H_x_x_D_N	C	H	.
B1_304	GCF_003063985.1	1392	1392	Bacillus_anthracis	Bacteria-Terrabacteria_group-Bacillota-Bacilli-Bacillales-Bacillaceae-Bacillus-Bacillus_cereus_group-	5673784	NZ_QAEJ01000001.1	class_B1	274.2	+	1435065	1435779	1435012	1435782	ATGAAAAATACATTATTAAAATTAGGGGTATGTGTTAGTTTACTAGGAATAACTCCATTTGTTAGTACAATTTCTTCTGTACAAGCAGAACGAAAGGTAGAGCATAAAGTAATAAAAAATGAGACAGGAACTATTTCAATTTCTCAGTTAAACAAAAATGTTTGGGTTCATACGGAGTTAGGTTATTTTAACGGAGAAGCAGTTCCTTCGAACGGTTTAATCCTTAATACTTCTAAAGGATTAGTACTTGTCGATTCTTCTTGGGATGATAAGTTAACGAAGGAATTAATAGAGATGGCAGAAAAGAAATTTAAGAAGAGTGTAACGGATGTTATTATTACACATGCACACGCTGATCGGATTGGTGGAATAAAAACGTTGAAAGAAAGAGGCATTAAA…	WP_000799223.1	BcII_family_subclass_B1_metallo-beta-lactamase	MKNTLLKLGVCVSLLGITPFVSTISSVQAERKVEHKVIKNETGTISISQLNKNVWVHTELGYFNGEAVPSNGLILNTSKGLVLVDSSWDDKLTKELIEMAEKKFKKSVTDVIITHAHADRIGGIKTLKERGIKAHSTTLTAELAKKNGYEEPLGDLQAITKLKFGNMKVETFYPGKGHTEDNIVVWLPQYNMLVGGCLVKSASAKDLGNITDAYVNEWSTSIENVLKRYENINFVVPGHGEVGDKGLLLHTLDLLK	ORF_OK	TRUE_HIT	llllslaaa........eekeeeekdelkiekladnvyvhtsykevegvgkvssngLvvidekevvlvDtpwteeqtekLldwiekklklkvkavistHfHeDrlGGlealnkkgiktyasalTnellkkegkeqakhsfkkeekltlgkekievfypGegHtkDNiVvwlpkekiLfGGClvksaeakslGnlgdAnveeWpksvekvkakypeakiVipGHgevgdkellehTlklle	TPFVSTISSvqaerkveHKVIKNETGTISISQLNKNVWVHTELGYFNGE-AVPSNGLILNTSKGLVLVDSSWDDKLTKELIEMAEKKFKKSVTDVIITHAHADRIGGIKTLKERGIKAHSTTLTAELAKKNGYEEPLGDLQAITKLKFGNMKVETFYPGKGHTEDNIVVWLPQYNMLVGGCLVKSASAKDLGNITDAYVNEWSTSIENVLKRYENINFVVPGHGEVGDKGLLLHTLDLLK	16	247	91.3043	8	1	0	256	Cluster_137	BcII_family_subclass_B1_metallo-beta-lactamase_NG_047224.1_cds_WP_012261328.1_1	Cluster_139	SP_Sec_SPI_	29-30	SP_Sec_SPI_	29-30	H_x_H_x_D	H_x_x_D_N	C	H	.
B1_305	GCF_003064005.1	1392	1392	Bacillus_anthracis	Bacteria-Terrabacteria_group-Bacillota-Bacilli-Bacillales-Bacillaceae-Bacillus-Bacillus_cereus_group-	5457902	NZ_QAEK01000001.1	class_B1	275.5	-	333834	334548	333832	334602	ATGAAAAATACATTATTAAAATTAGGGGTATGTGTTAGTTTACTAGGAATAACTCCATTTGTTAGTACAATTTCTTCTGTACAAGCAGAACGAAAGGTAGAGCATAAAGTAATAAAAAATGAGACAGGAACTATTTCAATTTCTCAGTTAAACAAAAATGTTTGGGTTCATACGGAGTTAGGTTATTTTAACGGAGAAGCAGTTCCTTCGAACGGTTTAATCCTTAATACTTCTAAAGGATTAGTACTTGTCGATTCTTCTTGGGATGATAAGTTAACGAAGGAATTAATAGAGATGGCAGAAAAGAAATTTAAGAAGAGTGTAACGGATGTTATTATTACACATGCACACGCTGATCGGATTGGTGGAATAAAAACGTTGAAAGAAAGAGGCATTAAA…	WP_000799223.1	BcII_family_subclass_B1_metallo-beta-lactamase	MKNTLLKLGVCVSLLGITPFVSTISSVQAERKVEHKVIKNETGTISISQLNKNVWVHTELGYFNGEAVPSNGLILNTSKGLVLVDSSWDDKLTKELIEMAEKKFKKSVTDVIITHAHADRIGGIKTLKERGIKAHSTTLTAELAKKNGYEEPLGDLQAITKLKFGNMKVETFYPGKGHTEDNIVVWLPQYNMLVGGCLVKSASAKDLGNITDAYVNEWSTSIENVLKRYENINFVVPGHGEVGDKGLLLHTLDLLK	ORF_OK	TRUE_HIT	llllslaaa........eekeeeekdelkiekladnvyvhtsykevegvgkvssngLvvidekevvlvDtpwteeqtekLldwiekklklkvkavistHfHeDrlGGlealnkkgiktyasalTnellkkegkeqakhsfkkeekltlgkekievfypGegHtkDNiVvwlpkekiLfGGClvksaeakslGnlgdAnveeWpksvekvkakypeakiVipGHgevgdkellehTlklle	TPFVSTISSvqaerkveHKVIKNETGTISISQLNKNVWVHTELGYFNGE-AVPSNGLILNTSKGLVLVDSSWDDKLTKELIEMAEKKFKKSVTDVIITHAHADRIGGIKTLKERGIKAHSTTLTAELAKKNGYEEPLGDLQAITKLKFGNMKVETFYPGKGHTEDNIVVWLPQYNMLVGGCLVKSASAKDLGNITDAYVNEWSTSIENVLKRYENINFVVPGHGEVGDKGLLLHTLDLLK	16	247	91.3043	8	1	0	256	Cluster_137	BcII_family_subclass_B1_metallo-beta-lactamase_NG_047224.1_cds_WP_012261328.1_1	Cluster_139	SP_Sec_SPI_	29-30	SP_Sec_SPI_	29-30	H_x_H_x_D	H_x_x_D_N	C	H	.
B1_306	GCF_003064015.1	1392	1392	Bacillus_anthracis	Bacteria-Terrabacteria_group-Bacillota-Bacilli-Bacillales-Bacillaceae-Bacillus-Bacillus_cereus_group-	5456851	NZ_QAEM01000001.1	class_B1	274.3	-	333860	334574	333858	334628	ATGAAAAATACATTATTAAAATTAGGGGTATGTGTTAGTTTACTAGGAATAACTCCATTTGTTAGTACAATTTCTTCTGTACAAGCAGAACGAAAGGTAGAGCATAAAGTAATAAAAAATGAGACAGGAACTATTTCAATTTCTCAGTTAAACAAAAATGTTTGGGTTCATACGGAGTTAGGTTATTTTAACGGAGAAGCAGTTCCTTCGAACGGTTTAATCCTTAATACTTCTAAAGGATTAGTACTTGTCGATTCTTCTTGGGATGATAAGTTAACGAAGGAATTAATAGAGATGGCAGAAAAGAAATTTAAGAAGAGTGTAACGGATGTTATTATTACACATGCACACGCTGATCGGATTGGTGGAATAAAAACGTTGAAAGAAAGAGGCATTAAA…	WP_000799223.1	BcII_family_subclass_B1_metallo-beta-lactamase	MKNTLLKLGVCVSLLGITPFVSTISSVQAERKVEHKVIKNETGTISISQLNKNVWVHTELGYFNGEAVPSNGLILNTSKGLVLVDSSWDDKLTKELIEMAEKKFKKSVTDVIITHAHADRIGGIKTLKERGIKAHSTTLTAELAKKNGYEEPLGDLQAITKLKFGNMKVETFYPGKGHTEDNIVVWLPQYNMLVGGCLVKSASAKDLGNITDAYVNEWSTSIENVLKRYENINFVVPGHGEVGDKGLLLHTLDLLK	ORF_OK	TRUE_HIT	llllslaaa........eekeeeekdelkiekladnvyvhtsykevegvgkvssngLvvidekevvlvDtpwteeqtekLldwiekklklkvkavistHfHeDrlGGlealnkkgiktyasalTnellkkegkeqakhsfkkeekltlgkekievfypGegHtkDNiVvwlpkekiLfGGClvksaeakslGnlgdAnveeWpksvekvkakypeakiVipGHgevgdkellehTlklle	TPFVSTISSvqaerkveHKVIKNETGTISISQLNKNVWVHTELGYFNGE-AVPSNGLILNTSKGLVLVDSSWDDKLTKELIEMAEKKFKKSVTDVIITHAHADRIGGIKTLKERGIKAHSTTLTAELAKKNGYEEPLGDLQAITKLKFGNMKVETFYPGKGHTEDNIVVWLPQYNMLVGGCLVKSASAKDLGNITDAYVNEWSTSIENVLKRYENINFVVPGHGEVGDKGLLLHTLDLLK	16	247	91.3043	8	1	0	256	Cluster_137	BcII_family_subclass_B1_metallo-beta-lactamase_NG_047224.1_cds_WP_012261328.1_1	Cluster_139	SP_Sec_SPI_	29-30	SP_Sec_SPI_	29-30	H_x_H_x_D	H_x_x_D_N	C	H	.
B1_307	GCF_003064045.1	1392	1392	Bacillus_anthracis	Bacteria-Terrabacteria_group-Bacillota-Bacilli-Bacillales-Bacillaceae-Bacillus-Bacillus_cereus_group-	5447432	NZ_QAEL01000016.1	class_B1	279.2	-	39530	40244	39528	40298	ATGAAAAATACATTATTAAAATTAGGGGTATGTGTTAGTTTACTAGGAATAACTCCATTTGTTAGTACAATTTCTTCTGTACAAGCAGAACGAAAGGTAGAGCATAAAGTAATAAAAAATGAGACAGGAACTATTTCAATTTCTCAGTTAAACAAAAATGTTTGGGTTCATACGGAGTTAGGTTATTTTAACGGAGAAGCAGTTCCTTCGAACGGTTTAATCCTTAATACTTCTAAAGGATTAGTACTTGTCGATTCTTCTTGGGATGATAAGTTAACGAAGGAATTAATAGAGATGGCAGAAAAGAAATTTAAGAAGAGTGTAACGGATGTTATTATTACACATGCACACGCTGATCGGATTGGTGGAATAAAAACGTTGAAAGAAAGAGGCATTAAA…	WP_000799223.1	BcII_family_subclass_B1_metallo-beta-lactamase	MKNTLLKLGVCVSLLGITPFVSTISSVQAERKVEHKVIKNETGTISISQLNKNVWVHTELGYFNGEAVPSNGLILNTSKGLVLVDSSWDDKLTKELIEMAEKKFKKSVTDVIITHAHADRIGGIKTLKERGIKAHSTTLTAELAKKNGYEEPLGDLQAITKLKFGNMKVETFYPGKGHTEDNIVVWLPQYNMLVGGCLVKSASAKDLGNITDAYVNEWSTSIENVLKRYENINFVVPGHGEVGDKGLLLHTLDLLK	ORF_OK	TRUE_HIT	llllslaaa........eekeeeekdelkiekladnvyvhtsykevegvgkvssngLvvidekevvlvDtpwteeqtekLldwiekklklkvkavistHfHeDrlGGlealnkkgiktyasalTnellkkegkeqakhsfkkeekltlgkekievfypGegHtkDNiVvwlpkekiLfGGClvksaeakslGnlgdAnveeWpksvekvkakypeakiVipGHgevgdkellehTlklle	TPFVSTISSvqaerkveHKVIKNETGTISISQLNKNVWVHTELGYFNGE-AVPSNGLILNTSKGLVLVDSSWDDKLTKELIEMAEKKFKKSVTDVIITHAHADRIGGIKTLKERGIKAHSTTLTAELAKKNGYEEPLGDLQAITKLKFGNMKVETFYPGKGHTEDNIVVWLPQYNMLVGGCLVKSASAKDLGNITDAYVNEWSTSIENVLKRYENINFVVPGHGEVGDKGLLLHTLDLLK	16	247	91.3043	8	1	0	256	Cluster_137	BcII_family_subclass_B1_metallo-beta-lactamase_NG_047224.1_cds_WP_012261328.1_1	Cluster_139	SP_Sec_SPI_	29-30	SP_Sec_SPI_	29-30	H_x_H_x_D	H_x_x_D_N	C	H	.
B1_308	GCF_003064085.1	1392	1392	Bacillus_anthracis	Bacteria-Terrabacteria_group-Bacillota-Bacilli-Bacillales-Bacillaceae-Bacillus-Bacillus_cereus_group-	5284532	NZ_QAEN01000002.1	class_B1	275.5	+	393519	394233	393466	394236	ATGAAAAATACATTATTAAAATTAGGGGTATGTGTTAGTTTACTAGGAATAACTCCATTTGTTAGTACAATTTCTTCTGTACAAGCAGAACGAAAGGTAGAGCATAAAGTAATAAAAAATGAGACAGGAACTATTTCAATTTCTCAGTTAAACAAAAATGTTTGGGTTCATACGGAGTTAGGTTATTTTAACGGAGAAGCAGTTCCTTCGAACGGTTTAATCCTTAATACTTCTAAAGGATTAGTACTTGTCGATTCTTCTTGGGATGATAAGTTAACGAAGGAATTAATAGAGATGGCAGAAAAGAAATTTAAGAAGAGTGTAACGGATGTTATTATTACACATGCACACGCTGATCGGATTGGTGGAATAAAAACGTTGAAAGAAAGAGGCATTAAA…	WP_000799223.1	BcII_family_subclass_B1_metallo-beta-lactamase	MKNTLLKLGVCVSLLGITPFVSTISSVQAERKVEHKVIKNETGTISISQLNKNVWVHTELGYFNGEAVPSNGLILNTSKGLVLVDSSWDDKLTKELIEMAEKKFKKSVTDVIITHAHADRIGGIKTLKERGIKAHSTTLTAELAKKNGYEEPLGDLQAITKLKFGNMKVETFYPGKGHTEDNIVVWLPQYNMLVGGCLVKSASAKDLGNITDAYVNEWSTSIENVLKRYENINFVVPGHGEVGDKGLLLHTLDLLK	ORF_OK	TRUE_HIT	llllslaaa........eekeeeekdelkiekladnvyvhtsykevegvgkvssngLvvidekevvlvDtpwteeqtekLldwiekklklkvkavistHfHeDrlGGlealnkkgiktyasalTnellkkegkeqakhsfkkeekltlgkekievfypGegHtkDNiVvwlpkekiLfGGClvksaeakslGnlgdAnveeWpksvekvkakypeakiVipGHgevgdkellehTlklle	TPFVSTISSvqaerkveHKVIKNETGTISISQLNKNVWVHTELGYFNGE-AVPSNGLILNTSKGLVLVDSSWDDKLTKELIEMAEKKFKKSVTDVIITHAHADRIGGIKTLKERGIKAHSTTLTAELAKKNGYEEPLGDLQAITKLKFGNMKVETFYPGKGHTEDNIVVWLPQYNMLVGGCLVKSASAKDLGNITDAYVNEWSTSIENVLKRYENINFVVPGHGEVGDKGLLLHTLDLLK	16	247	91.3043	8	1	0	256	Cluster_137	BcII_family_subclass_B1_metallo-beta-lactamase_NG_047224.1_cds_WP_012261328.1_1	Cluster_139	SP_Sec_SPI_	29-30	SP_Sec_SPI_	29-30	H_x_H_x_D	H_x_x_D_N	C	H	.
B1_309	GCF_003069525.1	573	573	Klebsiella_pneumoniae	Bacteria-Pseudomonadota-Gammaproteobacteria-Enterobacterales-Enterobacteriaceae-Klebsiella_Raoultella_group-Klebsiella-	5799475	NZ_CP028929.1	class_B1	266.8	-	168559	169327	168551	169363	ATGGAATTGCCCAATATTATGCACCCGGTCGCGAAGCTGAGCACCGCATTAGCCGCTGCATTGATGCTGAGCGGGTGCATGCCCGGTGAAATCCGCCCGACGATTGGCCAGCAAATGGAAACTGGCGACCAACGGTTTGGCGATCTGGTTTTCCGCCAGCTCGCACCGAATGTCTGGCAGCACACTTCCTATCTCGACATGCCGGGTTTCGGGGCAGTCGCTTCCAACGGTTTGATCGTCAGGGATGGCGGCCGCGTGCTGGTGGTCGATACCGCCTGGACCGATGACCAGACCGCCCAGATCCTCAACTGGATCAAGCAGGAGATCAACCTGCCGGTCGCGCTGGCGGTGGTGACTCACGCGCATCAGGACAAGATGGGCGGTATGGACGCGCTGCAT…	WP_004201164.1	subclass_B1_metallo-beta-lactamase_NDM-1	MELPNIMHPVAKLSTALAAALMLSGCMPGEIRPTIGQQMETGDQRFGDLVFRQLAPNVWQHTSYLDMPGFGAVASNGLIVRDGGRVLVVDTAWTDDQTAQILNWIKQEINLPVALAVVTHAHQDKMGGMDALHAAGIATYANALSNQLAPQEGMVAAQHSLTFAANGWVEPATAPNFGPLKVFYPGPGHTSDNITVGIDGTDIAFGGCLIKDSKAKSLGNLGDADTEHYAASARAFGAAFPKASMIVMSHSAPDSRAAITHTARMADKLR	ORF_OK	TRUE_HIT	kllllllllllllslaaa.........eekeeeekdelkiekladnvyvhtsykevegvgkvssngLvvidekevvlvDtpwteeqtekLldwiekklklkvkavistHfHeDrlGGlealnkkgiktyasalTnellkkegkeqakhsfkkeek......ltlgkekievfypGegHtkDNiVvwlpkekiLfGGClvksaeakslGnlgdAnveeWpksvekvkakypeakiVipGHgevgdkellehTlkllek	KLSTALAAALMLSGCMPGeirptigqqMETGDQRFGDLVFRQLAPNVWQHTSYLDMPGFGAVASNGLIVRDGGRVLVVDTAWTDDQTAQILNWIKQEINLPVALAVVTHAHQDKMGGMDALHAAGIATYANALSNQLAPQEGMVAAQHSLTFAANgwvepaTAPNFGPLKVFYPGPGHTSDNITVGIDGTDIAFGGCLIKDSKAKSLGNLGDADTEHYAASARAFGAAFPKASMIVMSHSAPDSRAAITHTARMADK	7	248	95.2569	15	0	0	270	Cluster_118	subclass_B1_metallo-beta-lactamase_NDM-18_NG_052866.1_cds_WP_077064890.1_1	Cluster_120	LIPO_Sec_SPII_	25-26	LIPO_Sec_SPII_	25-26	H_x_H_x_D	H_x_x_D_N	C	H	.
B1_31	GCF_002852995.3	573	573	Klebsiella_pneumoniae	Bacteria-Pseudomonadota-Gammaproteobacteria-Enterobacterales-Enterobacteriaceae-Klebsiella_Raoultella_group-Klebsiella-	5498451	NZ_CP028786.2	class_B1	269.3	+	11509	12277	11474	12286	ATGGAATTGCCCAATATTATGCACCCGGTCGCGAAGCTGAGCACCGCATTAGCCGCTGCATTGATGCTGAGCGGGTGCATGCCCGGTGAAATCCGCCCGACGATTGGCCAGCAAATGGAAACTGGCGACCAACGGTTTGGCGATCTGGTTTTCCGCCAGCTCGCACCGAATGTCTGGCAGCACACTTCCTATCTCGACATGCCGGGTTTCGGGGCAGTCGCTTCCAACGGTTTGATCGTCAGGGATGGCGGCCGCGTGCTGGTGGTCGATACCGCCTGGACCGATGACCAGACCGCCCAGATCCTCAACTGGATCAAGCAGGAGATCAACCTGCCGGTCGCGCTGGCGGTGGTGACTCACGCGCATCAGGACAAGATGGGCGGTATGGACGCGCTGCAT…	WP_004201164.1	subclass_B1_metallo-beta-lactamase_NDM-1	MELPNIMHPVAKLSTALAAALMLSGCMPGEIRPTIGQQMETGDQRFGDLVFRQLAPNVWQHTSYLDMPGFGAVASNGLIVRDGGRVLVVDTAWTDDQTAQILNWIKQEINLPVALAVVTHAHQDKMGGMDALHAAGIATYANALSNQLAPQEGMVAAQHSLTFAANGWVEPATAPNFGPLKVFYPGPGHTSDNITVGIDGTDIAFGGCLIKDSKAKSLGNLGDADTEHYAASARAFGAAFPKASMIVMSHSAPDSRAAITHTARMADKLR	ORF_OK	TRUE_HIT	kllllllllllllslaaa.........eekeeeekdelkiekladnvyvhtsykevegvgkvssngLvvidekevvlvDtpwteeqtekLldwiekklklkvkavistHfHeDrlGGlealnkkgiktyasalTnellkkegkeqakhsfkkeek......ltlgkekievfypGegHtkDNiVvwlpkekiLfGGClvksaeakslGnlgdAnveeWpksvekvkakypeakiVipGHgevgdkellehTlkllek	KLSTALAAALMLSGCMPGeirptigqqMETGDQRFGDLVFRQLAPNVWQHTSYLDMPGFGAVASNGLIVRDGGRVLVVDTAWTDDQTAQILNWIKQEINLPVALAVVTHAHQDKMGGMDALHAAGIATYANALSNQLAPQEGMVAAQHSLTFAANgwvepaTAPNFGPLKVFYPGPGHTSDNITVGIDGTDIAFGGCLIKDSKAKSLGNLGDADTEHYAASARAFGAAFPKASMIVMSHSAPDSRAAITHTARMADK	7	248	95.2569	15	0	0	270	Cluster_118	subclass_B1_metallo-beta-lactamase_NDM-18_NG_052866.1_cds_WP_077064890.1_1	Cluster_120	LIPO_Sec_SPII_	25-26	LIPO_Sec_SPII_	25-26	H_x_H_x_D	H_x_x_D_N	C	H	.
B1_310	GCF_003070725.1	2161662	2161662	Flavobacterium_sp_WLB	Bacteria-FCB_group-Bacteroidota_Chlorobiota_group-Bacteroidota-Flavobacteriia-Flavobacteriales-Flavobacteriaceae-Flavobacterium-unclassified_Flavobacterium-	5490360	NZ_QCWV01000064.1	class_B1	272.6	-	9645	10359	9622	10368	ATGCGAAAATTAGCTTCAATAGTTTTATTCTTAGTCATAACCTTAAATAGTTTTGGACAAAAGAAGAATTCTCCATTACCAATAAGTCATCTTACAGGTGACTTTTATGTTTATAAAACATTTCATGATTATAATGGAACGTTGATTTCTGCCAATGCCATGTATCTTGTTACAGATAAAGGTGTTGTGATGTTTGATGCACCTTGGGACGAAACTCAGTTTCAGCCTTTATTAGATAGTATAAAAGCAAAACATAATAAAGATGTGATAATGCTTTTTGCGACCCATTCTCACGATGATCGTGCAGGAGGATTTGATTTTTACAGAAAAAAAGGAATCAAAACATATTCGATTAAGTTAACAGATGATATTCTTAAAAAAGAAAACAAACCGAGAGCA…	WP_053473463.1	subclass_B1_metallo-beta-lactamase	MRKLASIVLFLVITLNSFGQKKNSPLPISHLTGDFYVYKTFHDYNGTLISANAMYLVTDKGVVMFDAPWDETQFQPLLDSIKAKHNKDVIMLFATHSHDDRAGGFDFYRKKGIKTYSIKLTDDILKKENKPRAEFIIPNDKFFTVGQHTFEVYYPGKGHASDNIVAWFDKEKVLYGACFIKSADAIDLGYLADSDVKEWKKSIGKVKAKFKNPKYIIPGHEDWTNTESLNHTLKLVDEYLAQKSSGKK	ORF_OK	TRUE_HIT	kllllllllllllslaaaeekeeeekdelkiekladnvyvhtsykevegvgkvssngLvvidekevvlvDtpwteeqtekLldwiekklklkvkavistHfHeDrlGGlealnkkgiktyasalTnellkkegkeqakhsfkkeekltlgkekievfypGegHtkDNiVvwlpkekiLfGGClvksaeakslGnlgdAnveeWpksvekvkakypeakiVipGHgevgdkellehTlkllekakk	KLASIVLFLVITL-----NSFGQKKNSPLPISHLTGDFYVYKTFHDYNGT-LISANAMYLVTDKGVVMFDAPWDETQFQPLLDSIKAKHNKDVIMLFATHSHDDRAGGFDFYRKKGIKTYSIKLTDDILKKENKPRAEFIIPNDKFFTVGQHTFEVYYPGKGHASDNIVAWFDKEKVLYGACFIKSADAIDLGYLADSDVKEWKKSIGKVKAKFKNPKYIIPGHEDWTNTESLNHTLKLVDEYLA	7	251	96.4427	0	6	0	248	Cluster_471	CLUSTER_NOT_IN_NCBI_AMR_REF_DB	Cluster_479	SP_Sec_SPI_	19-20	SP_Sec_SPI_	19-20	H_x_H_x_D	H_x_x_D_N	C	H	.
B1_311	GCF_003071065.1	2152717	2152717	Sphingobacterium_athyrii	Bacteria-FCB_group-Bacteroidota_Chlorobiota_group-Bacteroidota-Sphingobacteriia-Sphingobacteriales-Sphingobacteriaceae-Sphingobacterium-	6853865	NZ_QCXX01000002.1	class_B1	268.7	-	130309	131014	130304	131053	ATGTTCAAAAATACTATTTCGCTCTTCTCCGCAAAAGTAGCTACGCTACTTCTCGGTCTTTCTTGCTGTGTATTGCCATCTTTGCGCGCACAGGAAAAACCATTATCCATTGAAAAGATCAATTCACAGCTATATCTTTATACGACTTACAATACCTTTGAAGGCACCAAATATGCCGCTAATGCGGTCTATCTAATCACCAAGAAGGGTGTTATTCTATTTGATACGCCTTGGGACTCGACACAATATCAACCGCTTTTGGACAGTATTAAACAAAAGCATCAACTACCTGTCATTGCGGTATATGCCACACATTGGCATGAGGATCGCGCGGGAGGGTTTGCATATTATAATCGTATCGGCATTCCAACTTATGCGACAAAAATGACCAACGACCTG…	WP_108633062.1	BlaB_IND_MUS_family_subclass_B1_metallo-beta-lactamase	MFKNTISLFSAKVATLLLGLSCCVLPSLRAQEKPLSIEKINSQLYLYTTYNTFEGTKYAANAVYLITKKGVILFDTPWDSTQYQPLLDSIKQKHQLPVIAVYATHWHEDRAGGFAYYNRIGIPTYATKMTNDLLKANHKAQATHLVKINKTYKVGGQSFVLNFFGAGHSLDNVVVWFPDYQILDGGCFIKSSEAKNLGNIVDGDVKAWKPALARLLAKYPQIKMVIPGHDEWKDNQQIQRTEELLNEKQ	ORF_OK	TRUE_HIT	llllllllslaaaeekeeeekdelkiekladnvyvhtsykevegvgkvssngLvvidekevvlvDtpwteeqtekLldwiekklklkvkavistHfHeDrlGGlealnkkgiktyasalTnellkkegkeqakhsfkkeekltlgkekievfypGegHtkDNiVvwlpkekiLfGGClvksaeakslGnlgdAnveeWpksvekvkakypeakiVipGHgevgdkellehTlklleka	VATLLLGLSCCVL-PSLRAQEKPLSIEKINSQLYLYTTYNTFEGT-KYAANAVYLITKKGVILFDTPWDSTQYQPLLDSIKQKHQLPVIAVYATHWHEDRAGGFAYYNRIGIPTYATKMTNDLLKANHKAQATHLVKINKTYKVGGQSFVLNFFGAGHSLDNVVVWFPDYQILDGGCFIKSSEAKNLGNIVDGDVKAWKPALARLLAKYPQIKMVIPGHDEWKDNQQIQRTEELLNEK	12	249	93.6759	0	2	0	249	Cluster_592	CLUSTER_NOT_IN_NCBI_AMR_REF_DB	Cluster_455	LIPO_Sec_SPII_	21-22	LIPO_Sec_SPII_	21-22	H_x_H_x_D	H_x_x_D_N	C	H	.
B1_312	GCF_003071345.1	2169414	2169414	Chitinophaga_parva	Bacteria-FCB_group-Bacteroidota_Chlorobiota_group-Bacteroidota-Chitinophagia-Chitinophagales-Chitinophagaceae-Chitinophaga-	6146060	NZ_QCYK01000002.1	class_B1	244	-	1572908	1573622	1572879	1573625	ATGAAAAAACTGCTCCTCCTCCCCATGTTACTGCTGGCCGGCCACGCCCTGGCCCAGCGGGATTCCGCCACGCTGGTGGAGATATCCCCGTTAAAAGGTCATTCCTATTTATATGTCACCTACGGGAAACCAGACGATAAGACCTGGTACCCGGCCAACAGCCTGTTTGTGCGCACCCCGGCGGGCATTGTATTATTAGACACTCCCTGGGACGATGAGCAGGCAGACACGCTGGTAAACCAGCTGGAGGCCCGCTTTCATGAAAAAGTAGTGGCCTGCATCAGCACCCACTGGCATGCGGACCGCGTAGGGGGCATAAAAGCCCTGGCAGCGCGCGGCATTCCTACTTACGCCAGCGCACAAACCGTGGCACTGTGCGCAGCTAACGGCAAGGCTGCC…	WP_108687737.1	subclass_B1_metallo-beta-lactamase	MKKLLLLPMLLLAGHALAQRDSATLVEISPLKGHSYLYVTYGKPDDKTWYPANSLFVRTPAGIVLLDTPWDDEQADTLVNQLEARFHEKVVACISTHWHADRVGGIKALAARGIPTYASAQTVALCAANGKAAPAHAFSKDTTFRFGGTRIQTFYPGPGHTTDNIVVWLPEDQVLFAGCFLKSGLATSIGYTGDADLQAWPASIRKTEAKFPSARIIVPGHESLEGNPYERTLELIGKAGKENEKKKE	ORF_OK	TRUE_HIT	lrkllllllllllllslaaaeekeeeekdelkiekladnvyvhtsykevegvgkvssngLvvidekevvlvDtpwteeqtekLldwiekklklkvkavistHfHeDrlGGlealnkkgiktyasalTnellkkegkeqakhsfkkeekltlgkekievfypGegHtkDNiVvwlpkekiLfGGClvksaeakslGnlgdAnveeWpksvekvkakypeakiVipGHgevgdkellehTlklleka	MKKLLLLPMLLLAGHA-----LAQRDSATLVEISPLKGHSYLYVTYGKPDDKTWYPANSLFVRTPAGIVLLDTPWDDEQADTLVNQLEARFHEKVVACISTHWHADRVGGIKALAARGIPTYASAQTVALCAANGKAAPAHAFSKDTTFRFGGTRIQTFYPGPGHTTDNIVVWLPEDQVLFAGCFLKSGLATSIGYTGDADLQAWPASIRKTEAKFPSARIIVPGHESLEGNP-YERTLELIGKA	5	249	96.4427	0	6	0	248	Cluster_637	CLUSTER_NOT_IN_NCBI_AMR_REF_DB	Cluster_641	SP_Sec_SPI_	18-19	SP_Sec_SPI_	18-19	H_x_H_x_D	H_x_x_D_N	C	H	.
B1_313	GCF_003071465.1	492670	492670	Bacillus_velezensis	Bacteria-Terrabacteria_group-Bacillota-Bacilli-Bacillales-Bacillaceae-Bacillus-Bacillus_subtilis_group-Bacillus_amyloliquefaciens_group-	3975084	NZ_CP020874.1	class_B1	229.2	-	939631	940336	939626	940375	TTGAGAAGGCTTTCATTATTGATTGCGGGGTTATTTCTATTCGGCCTCTTTACTGCCGGAATGAAACCGGCACACGCGACGGAGAGCTCCGCAGCAAAAGATGTCACTCTCACACAGCTGGCGCCGCATGTCTGGATGCATACAAGCACCGGTACGGCAGACGGAAGTCCCGTCCCTGCGAACGGATTGCTTCTTGAGACTTCCAAAGGAATCGTACTGATTGATACTCCGTGGAATGACAGTCTCACAGAGCAATTAATGACACAAATAAAACAGCGGTTTCCCGGCAAAAGGATGACCGATGCCATTGTGACACACGCCCATGACGATCGTATCGGCGGTCTGAACACCCTGTACAAATACGGTGTAAAGGTGCACAGCACGAAGCTGACCGCCGAC…	WP_038457658.1	subclass_B1_metallo-beta-lactamase	MRRLSLLIAGLFLFGLFTAGMKPAHATESSAAKDVTLTQLAPHVWMHTSTGTADGSPVPANGLLLETSKGIVLIDTPWNDSLTEQLMTQIKQRFPGKRMTDAIVTHAHDDRIGGLNTLYKYGVKVHSTKLTADFARQQGYDRPLGDLKNVTKLQFGDMKIETFYPGKGHTEDNITVWLPEDKLLFGGCLIKALETKEIVPTPGFYPDQWPRAVRKVMKRYQDISIIVPGHGSPGDDRLLPHTINLLKET	ORF_OK	TRUE_HIT	lllllllslaaaeekeeeekdelkiekladnvyvhtsykevegvgkvssngLvvidekevvlvDtpwteeqtekLldwiekkl.klkvkavistHfHeDrlGGlealnkkgiktyasalTnellkkegkeqakhsfkkeekltlgkekievfypGegHtkDNiVvwlpkekiLfGGClvksaeakslGnlgdAnveeWpksvekvkakypeakiVipGHgevgdkellehTlkllek	LFGLFTAGMKPAHATESSAAKDVTLTQLAPHVWMHTSTGTADGS-PVPANGLLLETSKGIVLIDTPWNDSLTEQLMTQIKQRFpGKRMTDAIVTHAHDDRIGGLNTLYKYGVKVHSTKLTADFARQQGYDRPLGDLKNVTKLQFGDMKIETFYPGKGHTEDNITVWLPEDKLLFGGCLIKALETKEIVPTPGFYPDQWPRAVRKVMKRYQDISIIVPGHGSPGDDRLLPHTINLLKE	13	248	92.8854	1	1	0	249	Cluster_210	CLUSTER_NOT_IN_NCBI_AMR_REF_DB	Cluster_216	SP_Sec_SPI_	26-27	SP_Sec_SPI_	26-27	H_x_H_x_D	H_x_x_D_N	C	H	.
B1_314	GCF_003071545.1	593905	28901	Salmonella_enterica_subsp_enterica_serovar_Corvallis	Bacteria-Pseudomonadota-Gammaproteobacteria-Enterobacterales-Enterobacteriaceae-Salmonella-	5359100	NZ_CP027679.1	class_B1	267.5	-	57238	58006	57230	58042	ATGGAATTGCCCAATATTATGCACCCGGTCGCGAAGCTGAGCACCGCATTAGCCGCTGCATTGATGCTGAGCGGGTGCATGCCCGGTGAAATCCGCCCGACGATTGGCCAGCAAATGGAAACTGGCGACCAACGGTTTGGCGATCTGGTTTTCCGCCAGCTCGCACCGAATGTCTGGCAGCACACTTCCTATCTCGACATGCCGGGTTTCGGGGCAGTCGCTTCCAACGGTTTGATCGTCAGGGATGGCGGCCGCGTGCTGGTGGTCGATACCGCCTGGACCGATGACCAGACCGCCCAGATCCTCAACTGGATCAAGCAGGAGATCAACCTGCCGGTCGCGCTGGCGGTGGTGACTCACGCGCATCAGGACAAGATGGGCGGTATGGACGCGCTGCAT…	WP_004201164.1	subclass_B1_metallo-beta-lactamase_NDM-1	MELPNIMHPVAKLSTALAAALMLSGCMPGEIRPTIGQQMETGDQRFGDLVFRQLAPNVWQHTSYLDMPGFGAVASNGLIVRDGGRVLVVDTAWTDDQTAQILNWIKQEINLPVALAVVTHAHQDKMGGMDALHAAGIATYANALSNQLAPQEGMVAAQHSLTFAANGWVEPATAPNFGPLKVFYPGPGHTSDNITVGIDGTDIAFGGCLIKDSKAKSLGNLGDADTEHYAASARAFGAAFPKASMIVMSHSAPDSRAAITHTARMADKLR	ORF_OK	TRUE_HIT	kllllllllllllslaaa.........eekeeeekdelkiekladnvyvhtsykevegvgkvssngLvvidekevvlvDtpwteeqtekLldwiekklklkvkavistHfHeDrlGGlealnkkgiktyasalTnellkkegkeqakhsfkkeek......ltlgkekievfypGegHtkDNiVvwlpkekiLfGGClvksaeakslGnlgdAnveeWpksvekvkakypeakiVipGHgevgdkellehTlkllek	KLSTALAAALMLSGCMPGeirptigqqMETGDQRFGDLVFRQLAPNVWQHTSYLDMPGFGAVASNGLIVRDGGRVLVVDTAWTDDQTAQILNWIKQEINLPVALAVVTHAHQDKMGGMDALHAAGIATYANALSNQLAPQEGMVAAQHSLTFAANgwvepaTAPNFGPLKVFYPGPGHTSDNITVGIDGTDIAFGGCLIKDSKAKSLGNLGDADTEHYAASARAFGAAFPKASMIVMSHSAPDSRAAITHTARMADK	7	248	95.2569	15	0	0	270	Cluster_118	subclass_B1_metallo-beta-lactamase_NDM-18_NG_052866.1_cds_WP_077064890.1_1	Cluster_120	LIPO_Sec_SPII_	25-26	LIPO_Sec_SPII_	25-26	H_x_H_x_D	H_x_x_D_N	C	H	.
B1_315	GCF_003073235.1	573	573	Klebsiella_pneumoniae	Bacteria-Pseudomonadota-Gammaproteobacteria-Enterobacterales-Enterobacteriaceae-Klebsiella_Raoultella_group-Klebsiella-	5617050	NZ_CP024039.1	class_B1	268	-	53487	54255	53479	54291	ATGGAATTGCCCAATATTATGCACCCGGTCGCGAAGCTGAGCACCGCATTAGCCGCTGCATTGATGCTGAGCGGGTGCATGCCCGGTGAAATCCGCCCGACGATTGGCCAGCAAATGGAAACTGGCGACCAACGGTTTGGCGATCTGGTTTTCCGCCAGCTCGCACCGAATGTCTGGCAGCACACTTCCTATCTCGACATGCCGGGTTTCGGGGCAGTCGCTTCCAACGGTTTGATCGTCAGGGATGGCGGCCGCGTGCTGGTGGTCGATACCGCCTGGACCGATGACCAGACCGCCCAGATCCTCAACTGGATCAAGCAGGAGATCAACCTGCCGGTCGCGCTGGCGGTGGTGACTCACGCGCATCAGGACAAGATGGGCGGTATGGACGCGCTGCAT…	WP_004201164.1	subclass_B1_metallo-beta-lactamase_NDM-1	MELPNIMHPVAKLSTALAAALMLSGCMPGEIRPTIGQQMETGDQRFGDLVFRQLAPNVWQHTSYLDMPGFGAVASNGLIVRDGGRVLVVDTAWTDDQTAQILNWIKQEINLPVALAVVTHAHQDKMGGMDALHAAGIATYANALSNQLAPQEGMVAAQHSLTFAANGWVEPATAPNFGPLKVFYPGPGHTSDNITVGIDGTDIAFGGCLIKDSKAKSLGNLGDADTEHYAASARAFGAAFPKASMIVMSHSAPDSRAAITHTARMADKLR	ORF_OK	TRUE_HIT	kllllllllllllslaaa.........eekeeeekdelkiekladnvyvhtsykevegvgkvssngLvvidekevvlvDtpwteeqtekLldwiekklklkvkavistHfHeDrlGGlealnkkgiktyasalTnellkkegkeqakhsfkkeek......ltlgkekievfypGegHtkDNiVvwlpkekiLfGGClvksaeakslGnlgdAnveeWpksvekvkakypeakiVipGHgevgdkellehTlkllek	KLSTALAAALMLSGCMPGeirptigqqMETGDQRFGDLVFRQLAPNVWQHTSYLDMPGFGAVASNGLIVRDGGRVLVVDTAWTDDQTAQILNWIKQEINLPVALAVVTHAHQDKMGGMDALHAAGIATYANALSNQLAPQEGMVAAQHSLTFAANgwvepaTAPNFGPLKVFYPGPGHTSDNITVGIDGTDIAFGGCLIKDSKAKSLGNLGDADTEHYAASARAFGAAFPKASMIVMSHSAPDSRAAITHTARMADK	7	248	95.2569	15	0	0	270	Cluster_118	subclass_B1_metallo-beta-lactamase_NDM-18_NG_052866.1_cds_WP_077064890.1_1	Cluster_120	LIPO_Sec_SPII_	25-26	LIPO_Sec_SPII_	25-26	H_x_H_x_D	H_x_x_D_N	C	H	.
B1_316	GCF_003073255.1	492670	492670	Bacillus_velezensis	Bacteria-Terrabacteria_group-Bacillota-Bacilli-Bacillales-Bacillaceae-Bacillus-Bacillus_subtilis_group-Bacillus_amyloliquefaciens_group-	4233757	NZ_CP025079.1	class_B1	223.7	+	1204978	1205668	1204985	1205674	ATGAAACCGGCAGACGCTGCGGAGGGCCCCGCAGCAAAAGATGTCACTCTCATACAGCTGGCGCCGCATGTTTGGATGCATACAAGCACCGGTACGGCAGACGGAAGTCCCGTCCCTGCGAACGGATTGCTTCTTGAGACTTCCAAAGGAATCGTACTGATTGATACTCCGTGGAATGACAGTCTCACAGAGCAATTAATGACACAAATAAAAAAGCGGTTTCCCGGCAAAAGGATGACCGATGCCATTGTGACACACGCCCATGATGATCGTATCGGCGGGCTGAACACCCTGTACAAATACGGCGTAAAGGTGCACAGCACGAAGCTGACCGCCGACTTGGCCCGAGAGCAGGGATATGACCGGCCGCTCGGAGATTTGAAAAACGTGACAAAGCTG…	WP_053573568.1	subclass_B1_metallo-beta-lactamase	MKPADAAEGPAAKDVTLIQLAPHVWMHTSTGTADGSPVPANGLLLETSKGIVLIDTPWNDSLTEQLMTQIKKRFPGKRMTDAIVTHAHDDRIGGLNTLYKYGVKVHSTKLTADLAREQGYDRPLGDLKNVTKLQFGDMKIETFYPGKGHTEDNMSVWLPEDKLLFGGCLIKALETKEIVPTPGFYPDKWPRAVRKVMKRYQDISIVVPGHGSPGDDRLLPHTINLLKET	ORF_OK	TRUE_HIT	llslaaaeekeeeekdelkiekladnvyvhtsykevegvgkvssngLvvidekevvlvDtpwteeqtekLldwiekkl.klkvkavistHfHeDrlGGlealnkkgiktyasalTnellkkegkeqakhsfkkeekltlgkekievfypGegHtkDNiVvwlpkekiLfGGClvksaeakslGnlgdAnveeWpksvekvkakypeakiVipGHgevgdkellehTlkllek	TAGMKPADAAEGPAAKDVTLIQLAPHVWMHTSTGTADGS-PVPANGLLLETSKGIVLIDTPWNDSLTEQLMTQIKKRFpGKRMTDAIVTHAHDDRIGGLNTLYKYGVKVHSTKLTADLAREQGYDRPLGDLKNVTKLQFGDMKIETFYPGKGHTEDNMSVWLPEDKLLFGGCLIKALETKEIVPTPGFYPDKWPRAVRKVMKRYQDISIVVPGHGSPGDDRLLPHTINLLKE	18	248	90.9091	1	1	0	229	Cluster_1171	CLUSTER_NOT_IN_NCBI_AMR_REF_DB	Cluster_1151	OTHER	0	OTHER	0	H_x_H_x_D	H_x_x_D_N	C	H	.
B1_317	GCF_003073455.1	492670	492670	Bacillus_velezensis	Bacteria-Terrabacteria_group-Bacillota-Bacilli-Bacillales-Bacillaceae-Bacillus-Bacillus_subtilis_group-Bacillus_amyloliquefaciens_group-	3947271	NZ_CP029034.1	class_B1	226.3	-	2227195	2227900	2227190	2227939	TTGAGAAAGCTTTCATTATTAATTGCGGGGTTATTTCTATTCGGCCTCTTTACTGCCGGAATGAAACCGGCACACGCGGCGGAGGGCTCCGCAGCAAAAGATGTCACTCTCACACAGCTGGCGCCGCATGTCTGGATGCATACAAGCACCGGTACGGCAGACGGAAGTCCCGTCCCTGCGAACGGATTGCTTCTTGAGACTTCAAAAGGAATCGTACTGATTGATACTCCGTGGAATGACAGTCTCACAGAGCAATTAATGACACAAATAAAACAGCGGTTTCCCGGCAAAAGGATGACCGATGCCATTGTGACACACGCCCATGACGATCGTATCGGCGGTCTGAACACCCTGTACAAATACGGGGTAAAGGTGCACAGCACGAAGCTGACCGCCGAC…	WP_032874487.1	subclass_B1_metallo-beta-lactamase	MRKLSLLIAGLFLFGLFTAGMKPAHAAEGSAAKDVTLTQLAPHVWMHTSTGTADGSPVPANGLLLETSKGIVLIDTPWNDSLTEQLMTQIKQRFPGKRMTDAIVTHAHDDRIGGLNTLYKYGVKVHSTKLTADFARQQGYDRPLGDLKNVTKLQFGDMKIETFYPGKGHTEDNIPVWLPEDKLLFGGCLIKALETKEIVPTPGFYPDQWPRAVSKVMKRYQDISIVVPGHGSPGDDRLLPHTINLLKET	ORF_OK	TRUE_HIT	lllllllslaaaeekeeeekdelkiekladnvyvhtsykevegvgkvssngLvvidekevvlvDtpwteeqtekLldwiekkl.klkvkavistHfHeDrlGGlealnkkgiktyasalTnellkkegkeqakhsfkkeekltlgkekievfypGegHtkDNiVvwlpkekiLfGGClvksaeakslGnlgdAnveeWpksvekvkakypeakiVipGHgevgdkellehTlkllek	LFGLFTAGMKPAHAAEGSAAKDVTLTQLAPHVWMHTSTGTADGS-PVPANGLLLETSKGIVLIDTPWNDSLTEQLMTQIKQRFpGKRMTDAIVTHAHDDRIGGLNTLYKYGVKVHSTKLTADFARQQGYDRPLGDLKNVTKLQFGDMKIETFYPGKGHTEDNIPVWLPEDKLLFGGCLIKALETKEIVPTPGFYPDQWPRAVSKVMKRYQDISIVVPGHGSPGDDRLLPHTINLLKE	13	248	92.8854	1	1	0	249	Cluster_210	CLUSTER_NOT_IN_NCBI_AMR_REF_DB	Cluster_216	SP_Sec_SPI_	26-27	SP_Sec_SPI_	26-27	H_x_H_x_D	H_x_x_D_N	C	H	.
B1_318	GCF_003073615.1	287	287	Pseudomonas_aeruginosa	Bacteria-Pseudomonadota-Gammaproteobacteria-Pseudomonadales-Pseudomonadaceae-Pseudomonas-Pseudomonas_aeruginosa_group-	6853499	NZ_CP029089.1	class_B1	256.6	+	5093368	5094127	5093345	5094145	ATGTTCAAACTTTTGAGTAAGTTATTGGTCTATTTGACCGCGTCTATCATGGCTATTGCGAGTCCGCTCGCTTTTTCCGTAGATTCTAGCGGTGAGTATCCGACAGTCAGCGAAATTCCGGTCGGGGAGGTCCGGCTTTACCAGATTGCCGATGGTGTTTGGTCGCATATCGCAACGCAGTCGTTTGATGGCGCAGTCTACCCGTCCAATGGTCTCATTGTCCGTGATGGTGATGAGTTGCTTTTGATTGATACAGCGTGGGGTGCGAAAAACACAGCGGCACTTCTCGCGGAGATTGAGAAGCAAATTGGACTTCCTGTAACGCGTGCAGTCTCCACGCACTTTCATGACGACCGCGTCGGCGGCGTTGATGTCCTTCGGGCGGCTGGGGTGGCAACG…	WP_003108247.1	subclass_B1_metallo-beta-lactamase_VIM-2	MFKLLSKLLVYLTASIMAIASPLAFSVDSSGEYPTVSEIPVGEVRLYQIADGVWSHIATQSFDGAVYPSNGLIVRDGDELLLIDTAWGAKNTAALLAEIEKQIGLPVTRAVSTHFHDDRVGGVDVLRAAGVATYASPSTRRLAEVEGNEIPTHSLEGLSSSGDAVRFGPVELFYPGAAHSTDNLVVYVPSASVLYGGCAIYELSRTSAGNVADADLAEWPTSIERIQQHYPEAQFVIPGHGLPGGLDLLKHTTNVVKAHTNRSVVE	ORF_OK	TRUE_HIT	llllllllslaaa.............eekeeeekdelkiekladnvyvhtsykevegvgkvssngLvvidekevvlvDtpwteeqtekLldwiekklklkvkavistHfHeDrlGGlealnkkgiktyasalTnellkkegkeqakhsfkkeek..ltlgkekievfypGegHtkDNiVvwlpkekiLfGGClvksaeakslGnlgdAnveeWpksvekvkakypeakiVipGHgevgdkellehTlkllekakk	LLVYLTASIMAIAsplafsvdssgeyPTVSEIPVGEVRLYQIADGVWSHIATQSFDGA-VYPSNGLIVRDGDELLLIDTAWGAKNTAALLAEIEKQIGLPVTRAVSTHFHDDRVGGVDVLRAAGVATYASPSTRRLAEVEGNEIPTHSLEGLSSsgDAVRFGPVELFYPGAAHSTDNLVVYVPSASVLYGGCAIYELSRTSAGNVADADLAEWPTSIERIQQHYPEAQFVIPGHGLPGGLDLLKHTTNVVKAHTN	12	251	94.4664	15	1	0	266	Cluster_131	subclass_B1_metallo-beta-lactamase_VIM-1_NG_050336.1_cds_WP_013263789.1_1	Cluster_134	SP_Sec_SPI_	26-27	SP_Sec_SPI_	26-27	H_x_H_x_D	H_x_x_D_N	C	H	.
B1_319	GCF_003073835.1	562	562	Escherichia_coli	Bacteria-Pseudomonadota-Gammaproteobacteria-Enterobacterales-Enterobacteriaceae-Escherichia-	5328723	NZ_CP029118.1	class_B1	267.4	-	109655	110423	109647	110459	ATGGAATTGCCCAATATTATGCACCCGGTCGCGAAGCTGAGCACCGCATTAGCCGCTGCATTGATGCTGAGCGGGTGCATGCCCGGTGAAATCCGCCCGACGATTGGCCAGCAAATGGAAACTGGCGACCAACGGTTTGGCGATCTGGTTTTCCGCCAGCTCGCACCGAATGTCTGGCAGCACACTTCCTATCTCGACATGCCGGGTTTCGGGGCAGTCGCTTCCAACGGTTTGATCGTCAGGGATGGCGGCCGCGTGCTGGTGGTCGATACCGCCTGGACCGATGACCAGACCGCCCAGATCCTCAACTGGATCAAGCAGGAGATCAACCTGCCGGTCGCGCTGGCGGTGGTGACTCACGCGCATCAGGACAAGATGGGCGGTATGGACGCGCTGCAT…	WP_004201164.1	subclass_B1_metallo-beta-lactamase_NDM-1	MELPNIMHPVAKLSTALAAALMLSGCMPGEIRPTIGQQMETGDQRFGDLVFRQLAPNVWQHTSYLDMPGFGAVASNGLIVRDGGRVLVVDTAWTDDQTAQILNWIKQEINLPVALAVVTHAHQDKMGGMDALHAAGIATYANALSNQLAPQEGMVAAQHSLTFAANGWVEPATAPNFGPLKVFYPGPGHTSDNITVGIDGTDIAFGGCLIKDSKAKSLGNLGDADTEHYAASARAFGAAFPKASMIVMSHSAPDSRAAITHTARMADKLR	ORF_OK	TRUE_HIT	kllllllllllllslaaa.........eekeeeekdelkiekladnvyvhtsykevegvgkvssngLvvidekevvlvDtpwteeqtekLldwiekklklkvkavistHfHeDrlGGlealnkkgiktyasalTnellkkegkeqakhsfkkeek......ltlgkekievfypGegHtkDNiVvwlpkekiLfGGClvksaeakslGnlgdAnveeWpksvekvkakypeakiVipGHgevgdkellehTlkllek	KLSTALAAALMLSGCMPGeirptigqqMETGDQRFGDLVFRQLAPNVWQHTSYLDMPGFGAVASNGLIVRDGGRVLVVDTAWTDDQTAQILNWIKQEINLPVALAVVTHAHQDKMGGMDALHAAGIATYANALSNQLAPQEGMVAAQHSLTFAANgwvepaTAPNFGPLKVFYPGPGHTSDNITVGIDGTDIAFGGCLIKDSKAKSLGNLGDADTEHYAASARAFGAAFPKASMIVMSHSAPDSRAAITHTARMADK	7	248	95.2569	15	0	0	270	Cluster_118	subclass_B1_metallo-beta-lactamase_NDM-18_NG_052866.1_cds_WP_077064890.1_1	Cluster_120	LIPO_Sec_SPII_	25-26	LIPO_Sec_SPII_	25-26	H_x_H_x_D	H_x_x_D_N	C	H	.
B1_32	GCF_002853015.1	1463164	1463165	Klebsiella_quasipneumoniae_subsp_similipneumoniae	Bacteria-Pseudomonadota-Gammaproteobacteria-Enterobacterales-Enterobacteriaceae-Klebsiella_Raoultella_group-Klebsiella-	5732541	NZ_NWEI01000047.1	class_B1	272.4	-	6835	7603	6827	7639	ATGGAATTGCCCAATATTATGCACCCGGTCGCGAAGCTGAGCACCGCATTAGCCGCTGCATTGATGCTGAGCGGGTGCATGCCCGGTGAAATCCGCCCGACGATTGGCCAGCAAATGGAAACTGGCGACCAACGGTTTGGCGATCTGGTTTTCCGCCAGCTCGCACCGAATGTCTGGCAGCACACTTCCTATCTCGACATGCCGGGTTTCGGGGCAGTCGCTTCCAACGGTTTGATCGTCAGGGATGGCGGCCGCGTGCTGGTGGTCGATACCGCCTGGACCGATGACCAGACCGCCCAGATCCTCAACTGGATCAAGCAGGAGATCAACCTGCCGGTCGCGCTGGCGGTGGTGACTCACGCGCATCAGGACAAGATGGGCGGTATGGACGCGCTGCAT…	WP_004201164.1	subclass_B1_metallo-beta-lactamase_NDM-1	MELPNIMHPVAKLSTALAAALMLSGCMPGEIRPTIGQQMETGDQRFGDLVFRQLAPNVWQHTSYLDMPGFGAVASNGLIVRDGGRVLVVDTAWTDDQTAQILNWIKQEINLPVALAVVTHAHQDKMGGMDALHAAGIATYANALSNQLAPQEGMVAAQHSLTFAANGWVEPATAPNFGPLKVFYPGPGHTSDNITVGIDGTDIAFGGCLIKDSKAKSLGNLGDADTEHYAASARAFGAAFPKASMIVMSHSAPDSRAAITHTARMADKLR	ORF_OK	TRUE_HIT	kllllllllllllslaaa.........eekeeeekdelkiekladnvyvhtsykevegvgkvssngLvvidekevvlvDtpwteeqtekLldwiekklklkvkavistHfHeDrlGGlealnkkgiktyasalTnellkkegkeqakhsfkkeek......ltlgkekievfypGegHtkDNiVvwlpkekiLfGGClvksaeakslGnlgdAnveeWpksvekvkakypeakiVipGHgevgdkellehTlkllek	KLSTALAAALMLSGCMPGeirptigqqMETGDQRFGDLVFRQLAPNVWQHTSYLDMPGFGAVASNGLIVRDGGRVLVVDTAWTDDQTAQILNWIKQEINLPVALAVVTHAHQDKMGGMDALHAAGIATYANALSNQLAPQEGMVAAQHSLTFAANgwvepaTAPNFGPLKVFYPGPGHTSDNITVGIDGTDIAFGGCLIKDSKAKSLGNLGDADTEHYAASARAFGAAFPKASMIVMSHSAPDSRAAITHTARMADK	7	248	95.2569	15	0	0	270	Cluster_118	subclass_B1_metallo-beta-lactamase_NDM-18_NG_052866.1_cds_WP_077064890.1_1	Cluster_120	LIPO_Sec_SPII_	25-26	LIPO_Sec_SPII_	25-26	H_x_H_x_D	H_x_x_D_N	C	H	.
B1_320	GCF_003073895.1	287	287	Pseudomonas_aeruginosa	Bacteria-Pseudomonadota-Gammaproteobacteria-Pseudomonadales-Pseudomonadaceae-Pseudomonas-Pseudomonas_aeruginosa_group-	7578039	NZ_CP029096.1	class_B1	294.3	-	372518	373223	372483	373223	ATGAAAAAATTATTTGTTTTATGTGTATTCTTCCTTTGCAACATTGCTGCTGCAGATGATTCTTTGCCTGATTTAAAAATTGAGAAGCTTGAAAAAGGCGTTTATGTTCATACTTCGTTTGAAGAAGTTAAAGGTTGGGGTGTAGTCACAAAACACGGTTTAGTGGTTCTTGTAAAGAATGATGCTTATCTGATAGATACTCCAATTACCGCTAAAGATACTGAAAAATTAGTTAATTGGTTTATTGAGCACGGCTATAGAATCAAAGGCAGTATTTCCACACATTTCCATGGCGACAGTACGGCTGGAATAGAGTGGCTTAATTCTCAATCTATCTCCACGTATGCCTCTGAATTAACAAATGAACTTCTAAAAAAAGACAATAAGGTGCAAGCTACA…	WP_063848609.1	subclass_B1_metallo-beta-lactamase_IMP-18	MKKLFVLCVFFLCNIAAADDSLPDLKIEKLEKGVYVHTSFEEVKGWGVVTKHGLVVLVKNDAYLIDTPITAKDTEKLVNWFIEHGYRIKGSISTHFHGDSTAGIEWLNSQSISTYASELTNELLKKDNKVQATNSFSGVSYSLIKNKIEVFYPGPGHTQDNVVVWLPEKKILFGGCFVKPDGLGNLGDANLEAWPKSAKILMSKYGKAKLVVSSHSEIGNASLLQRTWEQAVKGLNESKKPLQPSS	ORF_OK	TRUE_HIT	klrkllllllllllllslaaaeekeeeekdelkiekladnvyvhtsykevegvgkvssngLvvidekevvlvDtpwteeqtekLldwiekklklkvkavistHfHeDrlGGlealnkkgiktyasalTnellkkegkeqakhsfkkeekltlgkekievfypGegHtkDNiVvwlpkekiLfGGClvksaeakslGnlgdAnveeWpksvekvkakypeakiVipGHgevgdkellehTlkllekak	SMKKLFVLCVFFLCNIAAA------DDSLPDLKIEKLEKGVYVHTSFEEVKGWGVVTKHGLVVLVKNDAYLIDTPITAKDTEKLVNWFIE-HGYRIKGSISTHFHGDSTAGIEWLNSQSISTYASELTNELLKKDNKVQATNSFSGVSY-SLIKNKIEVFYPGPGHTQDNVVVWLPEKKILFGGCFVKP---DGLGNLGDANLEAWPKSAKILMSKYGKAKLVVSSHSEIGNASLLQRTWEQAVKGL	4	250	97.2332	0	11	0	246	Cluster_663	subclass_B1_metallo-beta-lactamase_IMP-37_NG_049201.1_cds_WP_063860593.1_1	Cluster_672	SP_Sec_SPI_	18-19	SP_Sec_SPI_	18-19	H_x_H_x_D	H_x_x_D_N	C	H	.
B1_321	GCF_003076535.1	492670	492670	Bacillus_velezensis	Bacteria-Terrabacteria_group-Bacillota-Bacilli-Bacillales-Bacillaceae-Bacillus-Bacillus_subtilis_group-Bacillus_amyloliquefaciens_group-	4013888	NZ_CP023414.1	class_B1	225.6	-	2233269	2233974	2233264	2234013	TTGAGAAAGCTTTCATTATTAATTGCGGGGTTATTTCTATTCGGCCTCTTTACTGCCGGAATGAAACCGGCAGACGCTGCGGAGGGCTCCGCAGCAAAAGGTGTCACTCTCACACAGCTGGCGCCGCATGTTTGGATGCATACAAGCACCGGTACGGCAGACGGAAGTCCCGTCCCTGCGAACGGATTGCTTCTTGAGACTTCCAAAGGAATCGTACTGATTGATACTCCGTGGAATGACAGTCTCACAGAGCAATTAATGACACAAATAAAAAAGCGGTTTCCCGGCAAAAGGATGACCGATGCCATTGTGACACACGCCCATGATGATCGTATCGGCGGGCTGAACACCCTGTACAAATACGGCGTAAAGGTGCACAGCACGAAGCTGACCGCCGAC…	WP_047935608.1	subclass_B1_metallo-beta-lactamase	MRKLSLLIAGLFLFGLFTAGMKPADAAEGSAAKGVTLTQLAPHVWMHTSTGTADGSPVPANGLLLETSKGIVLIDTPWNDSLTEQLMTQIKKRFPGKRMTDAIVTHAHDDRIGGLNTLYKYGVKVHSTKLTADFAREQGYDRPLGDLKNVTKLQFGDMKIETFYPGKGHTEDNMTVWLPEDKLLFGGCLIKALETKEIVPTPGFYPDKWPRAVRKVMKRYQDISIVVPGHGSPGDDRLLPHTINLLKET	ORF_OK	TRUE_HIT	lllllllslaaaeekeeeekdelkiekladnvyvhtsykevegvgkvssngLvvidekevvlvDtpwteeqtekLldwiekkl.klkvkavistHfHeDrlGGlealnkkgiktyasalTnellkkegkeqakhsfkkeekltlgkekievfypGegHtkDNiVvwlpkekiLfGGClvksaeakslGnlgdAnveeWpksvekvkakypeakiVipGHgevgdkellehTlkllek	LFGLFTAGMKPADAAEGSAAKGVTLTQLAPHVWMHTSTGTADGS-PVPANGLLLETSKGIVLIDTPWNDSLTEQLMTQIKKRFpGKRMTDAIVTHAHDDRIGGLNTLYKYGVKVHSTKLTADFAREQGYDRPLGDLKNVTKLQFGDMKIETFYPGKGHTEDNMTVWLPEDKLLFGGCLIKALETKEIVPTPGFYPDKWPRAVRKVMKRYQDISIVVPGHGSPGDDRLLPHTINLLKE	13	248	92.8854	1	1	0	249	Cluster_210	CLUSTER_NOT_IN_NCBI_AMR_REF_DB	Cluster_216	SP_Sec_SPI_	26-27	SP_Sec_SPI_	26-27	H_x_H_x_D	H_x_x_D_N	C	H	.
B1_322	GCF_003095655.1	2173169	2173169	Dokdonia_sp_Dokd-P16	Bacteria-FCB_group-Bacteroidota_Chlorobiota_group-Bacteroidota-Flavobacteriia-Flavobacteriales-Flavobacteriaceae-Dokdonia-unclassified_Dokdonia-	3623447	NZ_CP029151.1	class_B1	195.3	+	2799125	2799851	2799108	2799899	ATGTGTCGACTACTACAGATGTTAGGGATCTGTCTAGCCGTACTACTATTAAACTCCTGTTTTGATAATAGTAAGTATGATCCAGAACCATATGTGAGATCTTTGGAGATCATAAAATTATCAGAGCAAGATTACATACATGTATCTTACCTAAAAGATAGTTATGGTGGTTATATTCCTTGCAATGGTTACATACGATTAGAAGGAAGCGAAGCTTTTATTTTTGACACACCTCTTAACGATACACTTTCTGAGCAGCTTATCACATTTGTACAAGAAGACTTAAAGGCAACTATAAAAGGGGTGCAAGTGAGTCACTCTCATATAGATGGAGCTGGTGGTATTAACGCTTTCGCGAAAGCAAAAATACCCACCTACGCATCTACCAAAACAGCAGCA…	WP_108878578.1	subclass_B1_metallo-beta-lactamase	MCRLLQMLGICLAVLLLNSCFDNSKYDPEPYVRSLEIIKLSEQDYIHVSYLKDSYGGYIPCNGYIRLEGSEAFIFDTPLNDTLSEQLITFVQEDLKATIKGVQVSHSHIDGAGGINAFAKAKIPTYASTKTAALLVKDSLAISNPFSQKDSIQIAKKFVVMEYLGPAHSDDNSIAYIRASDILLGGCMIKPLDGTKGNLADANLDEWANTVTTLQNRYPKVLQVIPGHGRRGDKELLDYTISMFQKDSPENNTTAETVAVVKN	ORF_OK	TRUE_HIT	kllllllllllllslaaa.eekeeeekdelkiekladnvyvhtsykevegvgkvssngLvvidekevvlvDtpwteeqtekLldwiekklklkvkavistHfHeDrlGGlealnkkgiktyasalTnellkkegkeqakhsfkkeekltlgkekievfypGegHtkDNiVvwlpkekiLfGGClvksaeakslGnlgdAnveeWpksvekvkakypeakiVipGHgevgdkellehTlkllekak	QMLGICLAVLLLNSCFDNsKYDPEPYVRSLEIIKLSEQDYIHVSYLKDSYGGYIPCNGYIRLEGSEAFIFDTPLNDTLSEQLITFVQEDLKATIKGVQVSHSHIDGAGGINAFAKAKIPTYASTKTAALLVKDSLAISN-PFSQKDSIQIAKKFVVMEYLGPAHSDDNSIAYIRASDILLGGCMIKPLDG-TKGNLADANLDEWANTVTTLQNRYPKVLQVIPGHGRRGDKELLDYTISMFQKDS	7	250	96.0474	1	2	0	263	Cluster_225	CLUSTER_NOT_IN_NCBI_AMR_REF_DB	Cluster_229	LIPO_Sec_SPII_	19-20	LIPO_Sec_SPII_	19-20	H_x_H_x_D	H_x_x_D_N	C	H	.
B1_323	GCF_003096175.1	332101	332101	Clostridium_drakei	Bacteria-Terrabacteria_group-Bacillota-Clostridia-Eubacteriales-Clostridiaceae-Clostridium-	5695241	NZ_CP020953.1	class_B1	258.6	+	1762351	1763122	1762325	1763131	ATGAAAAATTTTAAACGTGTATTTACTATATTTTTAAGTTTAGTATTAATTGCAACTATGACTTCTTGTTCCAATAAGACAAAGGAAACGACTTTAGTAGAAGATAAAAAAGTGAAAGAATCCGTATTTAAAAGTGGAAGCAATGATTCTAATTTTGTGCAGTTAACTAAAATTAATGATAATGTCTGGGTGCATACCACATACTATAACATTAATGGAGTTAGAACCTTATCAAATGGTTTATTGGTTTTAACAACTAAAGGATTGGTGTTGTTAGATACACCTTGGACTAATGATCAAACAAAAGAATTAATTAAACTAACAAAAGAAAAATTTAATCAAAATATTATTGCTGCAATAGTAACACATGCACATATGGATAGGATTGGTGGAATTAAA…	WP_032078905.1	subclass_B1_metallo-beta-lactamase	MKNFKRVFTIFLSLVLIATMTSCSNKTKETTLVEDKKVKESVFKSGSNDSNFVQLTKINDNVWVHTTYYNINGVRTLSNGLLVLTTKGLVLLDTPWTNDQTKELIKLTKEKFNQNIIAAIVTHAHMDRIGGIKTLLNNKIDVKSTPLTAQMAEKSGYDRPNPSITNNDEVLSFGETNLEVYFPGEGHTADNIVVWLPKYKILYAGCIAKPLESNSIGNTSDANIKEWPNSVQNLINKFPNAEIVIPSHGKWGSKQILTHTLDLLKKLF	ORF_OK	TRUE_HIT	kllllllllllllslaaa................eekeeeekdelkiekladnvyvhtsykevegvgkvssngLvvidekevvlvDtpwteeqtekLldwiekklklkvkavistHfHeDrlGGlealnkkgiktyasalTnellkkegkeqakhsfkkeek.ltlgkekievfypGegHtkDNiVvwlpkekiLfGGClvksaeakslGnlgdAnveeWpksvekvkakypeakiVipGHgevgdkellehTlkllek	TIFLSLVLIATMTSCSNKtkettlvedkkvkesvFKSGSNDSNFVQLTKINDNVWVHTTYYNINGV-RTLSNGLLVLTTKGLVLLDTPWTNDQTKELIKLTKEKFNQNIIAAIVTHAHMDRIGGIKTLLNNKIDVKSTPLTAQMAEKSGYDRPNPSITNNDEvLSFGETNLEVYFPGEGHTADNIVVWLPKYKILYAGCIAKPLESNSIGNTSDANIKEWPNSVQNLINKFPNAEIVIPSHGKWGSKQILTHTLDLLKK	7	248	95.2569	17	1	0	268	Cluster_134	CLUSTER_NOT_IN_NCBI_AMR_REF_DB	Cluster_153	LIPO_Sec_SPII_	22-23	LIPO_Sec_SPII_	22-23	H_x_H_x_D	H_x_x_D_N	C	H	.
B1_324	GCF_003096355.1	1765052	1765052	Pontibacter_virosus	Bacteria-FCB_group-Bacteroidota_Chlorobiota_group-Bacteroidota-Cytophagia-Cytophagales-Hymenobacteraceae-Pontibacter-	4884877	NZ_QEKI01000005.1	class_B1	265.8	-	210864	211581	210862	211659	ATGTTACGCGAAAGAATTAAGATATCCTTGTTAGCCGGTCTGCTGCTCTCTTTTGGTATGCTCTCTTGCCAGCGTCCCGACAGCCCGGAGCGAAAGACAGAGGATGAAAAAGTCGCTACTTTTCCTACCAAAAAACAACAAAGCTATACCTCTCAAACACTGGAAGTACACAAAATAGCAGAGCAGGTATACCAGCACTTATCCTTTCTGGAAACCCAAAGCTTCGGCAAGGTACCCTGCAACGGGATGGTGGTGATCGATCAGCAGGAGGCCATCATTTTTGACACACCGACAACAGACCAAGCCTCACTGGAGTTGATCGACTGGGTGGAAAAAAGCTTGGGATGCAAGGTAAAGGCGGTTGTCGCCACACACTTTCATGAGGACTGCCTGGGCGGA…	WP_243409511.1	subclass_B1_metallo-beta-lactamase	MLRERIKISLLAGLLLSFGMLSCQRPDSPERKTEDEKVATFPTKKQQSYTSQTLEVHKIAEQVYQHLSFLETQSFGKVPCNGMVVIDQQEAIIFDTPTTDQASLELIDWVEKSLGCKVKAVVATHFHEDCLGGLQAFQQRGVHTYASHRTIALAKANHTAVPAYSFDTELYLEVGNEKVQVLYPGKGHTHDNVVGYFPKAEAMFGGCLIKELGAGKGNLADADTVAWSQTVAELKASYPRVKYVIPGHGKVGGPELLDYTIRLFE	ORF_OK	TRUE_HIT	a.................eekeeeekdelkiekladnvyvhtsykevegvgkvssngLvvidekevvlvDtpwteeqtekLldwiekklklkvkavistHfHeDrlGGlealnkkgiktyasalTnellkkegkeqakhsfkkeekltlgkekievfypGegHtkDNiVvwlpkekiLfGGClvksaeakslGnlgdAnveeWpksvekvkakypeakiVipGHgevgdkellehTlklle	PdsperktedekvatfptKKQQSYTSQTLEVHKIAEQVYQHLSFLETQSFGKVPCNGMVVIDQQEAIIFDTPTTDQASLELIDWVEKSLGCKVKAVVATHFHEDCLGGLQAFQQRGVHTYASHRTIALAKANHTAVPAYSFDTELYLEVGNEKVQVLYPGKGHTHDNVVGYFPKAEAMFGGCLIKELGA-GKGNLADADTVAWSQTVAELKASYPRVKYVIPGHGKVGGPELLDYTIRLFE	24	247	88.1423	17	1	0	265	Cluster_198	CLUSTER_NOT_IN_NCBI_AMR_REF_DB	Cluster_203	LIPO_Sec_SPII_	22-23	LIPO_Sec_SPII_	22-23	H_x_H_x_D	H_x_x_D_N	C	H	.
B1_325	GCF_003096795.1	2135624	2135624	Flavobacterium_sp_103	Bacteria-FCB_group-Bacteroidota_Chlorobiota_group-Bacteroidota-Flavobacteriia-Flavobacteriales-Flavobacteriaceae-Flavobacterium-unclassified_Flavobacterium-	4331524	NZ_QENX01000001.1	class_B1	277.9	+	3615360	3616080	3615358	3616110	ATGCGAAAAATAACAGCGATAATTTTATTTTTCATAGTGCTGTCAAATAGTTTTGGACAATCTAAAAATTCGCCTTTGCAAATAAGTCATCTTATAGGTGACTTTTATGTTTATAAAACTTTTCATGATTATAAAGGAACTCTCATTTCTGCAAACGCAATGTATCTGGTTACAGATAAAGGAGTTGTTTTATTTGACGCTCCGTGGGATAAATCTCAATTTCAGCCTTTGTTAGACAGCATAAAATTCAAACATAATAAAAATATTGTGATGTGTTTTGCAACGCATTCTCATGACGATCGAGCAGGAGGCTTGGAGTTTTTTAGACAAAAAGGAATTAAAACCTATACTATAAAATTAACTGACGAGATTCTAAAAAATAAAAATGAAAAAAGAGCT…	WP_116797844.1	subclass_B1_metallo-beta-lactamase	MRKITAIILFFIVLSNSFGQSKNSPLQISHLIGDFYVYKTFHDYKGTLISANAMYLVTDKGVVLFDAPWDKSQFQPLLDSIKFKHNKNIVMCFATHSHDDRAGGLEFFRQKGIKTYTIKLTDEILKNKNEKRAEFVIPNDTIFKVGEYKFEVYYPGKGHAPDNIVVWFDKEKVLYGGCFIKSADAKDLGYLGDANVNEWENSIKKVQTKFKNPKFIIPGHEDWTDIGSLDHTLKLVQEYKKNASVELNKK	ORF_OK	TRUE_HIT	lrkllllllllllllslaaaeekeeeekdelkiekladnvyvhtsykevegvgkvssngLvvidekevvlvDtpwteeqtekLldwiekklklkvkavistHfHeDrlGGlealnkkgiktyasalTnellkkegkeqakhsfkkeekltlgkekievfypGegHtkDNiVvwlpkekiLfGGClvksaeakslGnlgdAnveeWpksvekvkakypeakiVipGHgevgdkellehTlkllekakk	MRKITAIILF----FIVLS-NSFGQSKNSPLQISHLIGDFYVYKTFHDYKGT-LISANAMYLVTDKGVVLFDAPWDKSQFQPLLDSIKFKHNKNIVMCFATHSHDDRAGGLEFFRQKGIKTYTIKLTDEILKNKNEKRAEFVIPNDTIFKVGEYKFEVYYPGKGHAPDNIVVWFDKEKVLYGGCFIKSADAKDLGYLGDANVNEWENSIKKVQTKFKNPKFIIPGHEDWTDIGSLDHTLKLVQEYKK	5	251	97.2332	0	6	0	250	Cluster_407	CLUSTER_NOT_IN_NCBI_AMR_REF_DB	Cluster_459	SP_Sec_SPI_	19-20	SP_Sec_SPI_	21-22	H_x_H_x_D	H_x_x_D_N	C	H	.
[truncated: 23,363 more rows]
