# Supplementary material for: Predatory myxobacteria lay at the cross-roads of metallo-β-lactamase evolution
Source: Research Square preprint supplement (doi:10.21203/rs.3.rs-7386923/v1), 2025-09-15
Supplement: Supplementary file 2 [file d1058b26c133a42e1d718fce.xlsx]

## Sheet: B2_whole_proteins_positives_met
1.Hit_code	2.Assembly	3.Strain_taxid	4.Species_taxid	5.Species_name	6.Taxonomic_lineage	7.Genome_size	8.Contig_containing_hit	9.Beta-lactamase_class	10.HMMER_score	11.Strand	12.Hit_start_nt	13.Hit_end_nt	14.CDS_start	15.CDS_end	16.CDS_sequence	17.Protein_ID	18.Annotation	19.Protein_sequence	20.ORF_check	21.Hit_check	22.Aligned_profile	23.Aligned_query	24.HMM_from	25.HMM_to	26.HMM_coverage	27.Insertions	28.Deletions	29.Stops	30.Protein_size	31.CDS_cluster	32.Known_family?	33.Protein_cluster	34.Gram_negative_SP	35.Gram_negative_cleavage	36.Gram_positive_SP	37.Gram_positive_cleavage	38.x116xxxD	39.C221	40.H263	41.Motif4	42.comment
B2_1	GCF_002843345.1	646	646	Aeromonas_sobria	Bacteria-Pseudomonadota-Gammaproteobacteria-Aeromonadales-Aeromonadaceae-Aeromonas-	4796048	NZ_LJZX01000064.1	class_B2	550.4	-	13147	13906	13145	13909	ATGATGAAAGGTTGGATGAAGTGTGGATTGGCCGGGGCCGTGGTGCTGATGGCGAGTTTCTGGGGCGGCAGCGTGCGGGCGGCGGGGATCTCCCTTAAGCAGGTAAGCGGCCCGGTCTATGTGGTAGAGGACAACTACTACGTAAAGGAAAACTCCATGGTCTATTTCGGGGCCAAGGGGGTGACGGTGGTGGGGGCGACCTGGACGCCGGATACCGCCCGCGAGCTGCACAAGCTGATCAAACGGGTCAGCAGCAAGCCGGTGCTGGAGGTGATCAACACCAACTACCACACCGATCGGGCGGGCGGTAACGCCTACTGGAAGTCCATCGGCGCCAAGGTGGTGGCGACGCGCCAGACCCGGGATCTGATGAAGAGCGACTGGGCCGAGATTGTCGCC…	WP_101320234.1	CphA_family_subclass_B2_metallo-beta-lactamase	MMKGWMKCGLAGAVVLMASFWGGSVRAAGISLKQVSGPVYVVEDNYYVKENSMVYFGAKGVTVVGATWTPDTARELHKLIKRVSSKPVLEVINTNYHTDRAGGNAYWKSIGAKVVATRQTRDLMKSDWAEIVAFTRKGLPEYPDLPLVLPNVVHEGDFTLQEGKVRAFYAGPAHTPDGIFVYFPDEQVLYGNCILKEKLGNLSFANVKAYPQTIERLKAMKLPIKTVIGGHDSPLHGPELIDHYEALIKAAPQS	ORF_OK	TRUE_HIT	mmkgwikcglagavvllasfwggsvraagislkqvsgpvyvvednyyvkensmvyfgakgvtvvgatwtpdtarelhklikrvsskpvlevintnyhtdraggnaywksigakvvatrqtrdlmksdwaeivaftrkglpeypdlplvlpnvvhdgdftlqegkvralyagpahtpdgifvyfpdeqvlygncilkeklgnlsfadvkaypktlerlkalklpiktvigghdsplhgpelidhyealikaaaks	MMKGWMKCGLAGAVVLMASFWGGSVRAAGISLKQVSGPVYVVEDNYYVKENSMVYFGAKGVTVVGATWTPDTARELHKLIKRVSSKPVLEVINTNYHTDRAGGNAYWKSIGAKVVATRQTRDLMKSDWAEIVAFTRKGLPEYPDLPLVLPNVVHEGDFTLQEGKVRAFYAGPAHTPDGIFVYFPDEQVLYGNCILKEKLGNLSFANVKAYPQTIERLKAMKLPIKTVIGGHDSPLHGPELIDHYEALIKAAPQS	1	254	99.6063	0	0	0	254	Cluster_4	ChpA_family_subclass_B2_metallo-beta-lactamase_ImiS_NG_050415.1_cds_WP_063865298.1_1	Cluster_4	SP_Sec_SPI_	27-28	SP_Sec_SPI_	27-28	N_Y_H_T_D	C	H	.	.
B2_10	GCF_002882055.1	2751331	2751331	Pseudomonas_sp_FW305-3-2-15-C-LB1	Bacteria-Pseudomonadota-Gammaproteobacteria-Pseudomonadales-Pseudomonadaceae-Pseudomonas-unclassified_Pseudomonas-	6616411	NZ_POEH01000010.1	class_B2	373.3	-	7051	7780	7040	7801	ATGAAGCTTAGCAGTATTCTCTCAGCCCTTAGCATGGCCTGCGTCACCTGTCAGGTAATCGCTAACGACACGAACCTGACTCTCACCCACTTCAAAGGCCCGCTCTACATCGTTGAAGACAAAGAGTATGTGCAAGAAAATTCAATGGTCTACATCGGTGCGCAAAACATCACGATTATCGGCGCAACCTGGACCCCAGCAACCGCCGAGAAGCTGGAGCAGGAAATCAGGAGAGTCAGCCCCCTGCCCATCAAGGACGTAATCAACACCAACTACCACACCGACCGCGCGGGCGGTAACGCGTACTGGAAAAAGCGCGGCGCGAGTATCGTCTCCACGCAGATGACCTATGACCTGGAAAAAAGCCAGTGGCGCAGTATTGTCGACTTCACCCGCCAA…	WP_102591908.1	SFH-related_subclass_B2_metallo-beta-lactamase	MKLSSILSALSMACVTCQVIANDTNLTLTHFKGPLYIVEDKEYVQENSMVYIGAQNITIIGATWTPATAEKLEQEIRRVSPLPIKDVINTNYHTDRAGGNAYWKKRGASIVSTQMTYDLEKSQWRSIVDFTRQGMEHFPVLEQSLPDKVHPGDFTLQNGNVRAMYLGAAHTEDGIFVYFPEERVLYGNCILKEKLGNMTFANRTEYPKTLKKLQGLIDSGELPVDAIIAGHNSPIQGVELIDQYLNLLEHDKH	ORF_OK	TRUE_HIT	gavvllasfwggsvraagi.slkqvsgpvyvvednyyvkensmvyfgakgvtvvgatwtpdtarelhklikrvsskpvlevintnyhtdraggnaywksigakvvatrqtrdlmksdwaeivaftrkglpeypdlplvlpnvvhdgdftlqegkvralyagpahtpdgifvyfpdeqvlygncilkeklgnlsfadvkaypktlerlkal....klpiktvigghdsplhgpelidhyealika	LSALSMACVTCQVIANDTNlTLTHFKGPLYIVEDKEYVQENSMVYIGAQNITIIGATWTPATAEKLEQEIRRVSPLPIKDVINTNYHTDRAGGNAYWKKRGASIVSTQMTYDLEKSQWRSIVDFTRQGMEHFPVLEQSLPDKVHPGDFTLQNGNVRAMYLGAAHTEDGIFVYFPEERVLYGNCILKEKLGNMTFANRTEYPKTLKKLQGLidsgELPVDAIIAGHNSPIQGVELIDQYLNLLEH	12	250	93.7008	5	0	0	253	Cluster_1	CLUSTER_NOT_IN_NCBI_AMR_REF_DB	Cluster_1	SP_Sec_SPI_	21-22	LIPO_Sec_SPII_	13-14	N_Y_H_T_D	C	Q	.	.
B2_100	GCF_006246325.1	654	654	Aeromonas_veronii	Bacteria-Pseudomonadota-Gammaproteobacteria-Aeromonadales-Aeromonadaceae-Aeromonas-	4642121	NZ_NKWN01000009.1	class_B2	547.2	+	133304	134063	133302	134066	ATGATGAAAAGTTGGATGAAGTGTGGATTGGCCGGGGCCGTGGTGCTGATGGCGAGTTTCTGGGGTGGCAGCGTGCGGGCGGCGGGGATCTCCCTCAAGCAGGTGAGCGGCCCTGTCTATGTGGTTGAAGATAACTACTACGTAAAGGAAAACTCCATGGTCTATTTCGGGGCCAAGGGGGTGACAGTGGTGGGGGCGACCTGGACGCCGGATACCGCGCGCGAGCTGCACAAGCTGATCAAACGGGTCAGCAGCAAGCCGGTGCTGGAGGTGATCAACACCAACTACCACACCGATCGGGCGGGCGGTAACGCCTACTGGAAGTCCATCGGGGCCAAGGTGGTGGCGACGCGCCAGACCCGGGATCTGATGAAGAGCGACTGGGCCGAGATTGTCGCC…	WP_139443368.1	CphA_family_subclass_B2_metallo-beta-lactamase	MMKSWMKCGLAGAVVLMASFWGGSVRAAGISLKQVSGPVYVVEDNYYVKENSMVYFGAKGVTVVGATWTPDTARELHKLIKRVSSKPVLEVINTNYHTDRAGGNAYWKSIGAKVVATRQTRDLMKSDWAEIVAFTRKGLPEYPDLPLVLPNVVHDGDFTLQEGKVRAFYAGPAHTPDGIFVYFPDEQVLYGNCILKEKLGNLSFANVKAYPQTIERLKAMKLPIKTVIGGHDSPLHGPELIDHYEELIKAAPQS	ORF_OK	TRUE_HIT	mmkgwikcglagavvllasfwggsvraagislkqvsgpvyvvednyyvkensmvyfgakgvtvvgatwtpdtarelhklikrvsskpvlevintnyhtdraggnaywksigakvvatrqtrdlmksdwaeivaftrkglpeypdlplvlpnvvhdgdftlqegkvralyagpahtpdgifvyfpdeqvlygncilkeklgnlsfadvkaypktlerlkalklpiktvigghdsplhgpelidhyealikaaaks	MMKSWMKCGLAGAVVLMASFWGGSVRAAGISLKQVSGPVYVVEDNYYVKENSMVYFGAKGVTVVGATWTPDTARELHKLIKRVSSKPVLEVINTNYHTDRAGGNAYWKSIGAKVVATRQTRDLMKSDWAEIVAFTRKGLPEYPDLPLVLPNVVHDGDFTLQEGKVRAFYAGPAHTPDGIFVYFPDEQVLYGNCILKEKLGNLSFANVKAYPQTIERLKAMKLPIKTVIGGHDSPLHGPELIDHYEELIKAAPQS	1	254	99.6063	0	0	0	254	Cluster_4	ChpA_family_subclass_B2_metallo-beta-lactamase_ImiS_NG_050415.1_cds_WP_063865298.1_1	Cluster_4	SP_Sec_SPI_	27-28	SP_Sec_SPI_	27-28	N_Y_H_T_D	C	H	.	.
B2_1000	GCF_000819685.1	656	656	Aeromonas_allosaccharophila	Bacteria-Pseudomonadota-Gammaproteobacteria-Aeromonadales-Aeromonadaceae-Aeromonas-	4663841	NZ_CDBR01000027.1	class_B2	547.9	+	38459	39218	38472	39221	ATGAAGTGCACATTAGCCGGGGCCGTGGTGCTGATGGCGAGTTTCTGGGGTGGCAGCGTGCGGGCGGCGGGGATCTCCCTCAAGCAGGTGAGTGGCCCTGTGTATGTGGTTGAAGATAACTACTACGTAAAGGAAAACTCCATGGTCTATTTCGGGGCCAAGGGGGTGACGGTGGTGGGGGCGACCTGGACGCCGGATACCGCCCGCGAGCTGCACAAGCTGATCAAACGGGTCAGCAGCAAGCCGGTGCTGGAGGTGATCAACACCAACTACCACACCGATCGGGTGGGCGGTAATGCCTACTGGAAGTCCATCGGGGCCAAGGTGGTGGCGACGCGCCAGACCCGGGATCTGATGAAGAGCGACTGGGCCGAGATTGTCGCCTTTACCCGCAAGGGG…	WP_244152232.1	CphA_family_subclass_B2_metallo-beta-lactamase	MKCTLAGAVVLMASFWGGSVRAAGISLKQVSGPVYVVEDNYYVKENSMVYFGAKGVTVVGATWTPDTARELHKLIKRVSSKPVLEVINTNYHTDRVGGNAYWKSIGAKVVATRQTRDLMKSDWAEIVAFTRKGLPEYPDLPLVLPNVVHDGDFTLQEGKVRAFYAGPAHTPDGIFVYFPDEQVLYGNCILKEKLGNLSFANVKAYPQTIERLKAMKLPIKTVIGGHDSPLHGPELIDHYEELIKAAPQS	ORF_OK	TRUE_HIT	mmkgwikcglagavvllasfwggsvraagislkqvsgpvyvvednyyvkensmvyfgakgvtvvgatwtpdtarelhklikrvsskpvlevintnyhtdraggnaywksigakvvatrqtrdlmksdwaeivaftrkglpeypdlplvlpnvvhdgdftlqegkvralyagpahtpdgifvyfpdeqvlygncilkeklgnlsfadvkaypktlerlkalklpiktvigghdsplhgpelidhyealikaaaks	MMKGWMKCTLAGAVVLMASFWGGSVRAAGISLKQVSGPVYVVEDNYYVKENSMVYFGAKGVTVVGATWTPDTARELHKLIKRVSSKPVLEVINTNYHTDRVGGNAYWKSIGAKVVATRQTRDLMKSDWAEIVAFTRKGLPEYPDLPLVLPNVVHDGDFTLQEGKVRAFYAGPAHTPDGIFVYFPDEQVLYGNCILKEKLGNLSFANVKAYPQTIERLKAMKLPIKTVIGGHDSPLHGPELIDHYEELIKAAPQS	1	254	99.6063	0	0	0	249	Cluster_4	ChpA_family_subclass_B2_metallo-beta-lactamase_ImiS_NG_050415.1_cds_WP_063865298.1_1	Cluster_4	SP_Sec_SPI_	22-23	SP_Sec_SPI_	22-23	N_Y_H_T_D	C	H	.	.
B2_1001	GCF_000819705.1	196024	196024	Aeromonas_dhakensis	Bacteria-Pseudomonadota-Gammaproteobacteria-Aeromonadales-Aeromonadaceae-Aeromonas-	4692336	NZ_CDBP01000069.1	class_B2	540.4	+	116653	117412	116654	117415	ATGAAAGGTTGGATAAAGTGCGGGTTGGCCGGGGCCCTGGTGCTGATGGCGAGCTTCTGGGGGGGCAGCGTGCGGGCGGCGGGGATGTCGCTGACGCAGGTGAGCGGCCCTGTCTATGTGGTGGAGGACAACTACTACGTCAAAGAGAACTCCATGGTCTATTTCGGGACCAAGGGGGTGACGGTGGTGGGGGCGACCTGGACGCCGGATACCGCCCGCGAGTTGCACAAGCTGATCAAACGGGTCAGCCGCCAGCCGGTGCTGGAGGTGATCAACACCAACTACCACACCGACCGGGCTGGCGGTAACGCCTACTGGAAGTCCATCGGTGCCAAGGTGGTATCGACCCGCCAGACCCGGGATCTGATGAAGAGCGACTGGGCCGAGATTGTCGCCTTT…	WP_042008783.1	CphA_family_subclass_B2_metallo-beta-lactamase	MKGWIKCGLAGALVLMASFWGGSVRAAGMSLTQVSGPVYVVEDNYYVKENSMVYFGTKGVTVVGATWTPDTARELHKLIKRVSRQPVLEVINTNYHTDRAGGNAYWKSIGAKVVSTRQTRDLMKSDWAEIVAFTRKGLPEYPDLPLVLPNVVHEGDFTLQEGKLRAFYAGPAHTPDGIFVYFPDEQVLYGNCILKEKLGNLSFADVKAYPQTLERLKAMKLPIKTVVGGHDSPLHGPELIDHYEELIKAVPQS	ORF_OK	TRUE_HIT	mmkgwikcglagavvllasfwggsvraagislkqvsgpvyvvednyyvkensmvyfgakgvtvvgatwtpdtarelhklikrvsskpvlevintnyhtdraggnaywksigakvvatrqtrdlmksdwaeivaftrkglpeypdlplvlpnvvhdgdftlqegkvralyagpahtpdgifvyfpdeqvlygncilkeklgnlsfadvkaypktlerlkalklpiktvigghdsplhgpelidhyealikaaaks	MMKGWIKCGLAGALVLMASFWGGSVRAAGMSLTQVSGPVYVVEDNYYVKENSMVYFGTKGVTVVGATWTPDTARELHKLIKRVSRQPVLEVINTNYHTDRAGGNAYWKSIGAKVVSTRQTRDLMKSDWAEIVAFTRKGLPEYPDLPLVLPNVVHEGDFTLQEGKLRAFYAGPAHTPDGIFVYFPDEQVLYGNCILKEKLGNLSFADVKAYPQTLERLKAMKLPIKTVVGGHDSPLHGPELIDHYEELIKAVPQS	1	254	99.6063	0	0	0	253	Cluster_4	ChpA_family_subclass_B2_metallo-beta-lactamase_ImiS_NG_050415.1_cds_WP_063865298.1_1	Cluster_4	SP_Sec_SPI_	26-27	SP_Sec_SPI_	26-27	N_Y_H_T_D	C	H	.	.
B2_1002	GCF_000819725.1	1114880	1114880	Aeromonas_australiensis	Bacteria-Pseudomonadota-Gammaproteobacteria-Aeromonadales-Aeromonadaceae-Aeromonas-	4110035	NZ_CDDH01000063.1	class_B2	545.3	+	10751	11510	10752	11513	ATGAAAGGTTGGATAAAGTTCACATTGGCCGGGGCCGTGGTGCTGATGGCGAGTTTCTGGGGCGGCAGCGTGCGGGCGGCGGGGATCTCCCTTAAGCAGGTGAGCGGCCCGGTGTATGTGGTGGAGGACAACTACTACGTCAAAGAGAACTCCATGGTCTATTTCGGGGCTAAGGGAGTGACGGTGGTGGGGGCGACCTGGACGCCGGATACTGCCCGCGAGCTGCACAAGCTGATCAAACGGGTCAGCAGCAAGCCGGTGCTGGAGGTGATCAACACCAACTACCACACCGACCGGGCGGGTGGTAATGCCTACTGGAAGTCCATCGGGGCCAAGGTGGTGGCGACGCGCCAGACCCGGGATCTGATGAAGAGCGACTGGGCCGAGATTGTCGCCTTT…	WP_040097284.1	CphA_family_subclass_B2_metallo-beta-lactamase	MKGWIKFTLAGAVVLMASFWGGSVRAAGISLKQVSGPVYVVEDNYYVKENSMVYFGAKGVTVVGATWTPDTARELHKLIKRVSSKPVLEVINTNYHTDRAGGNAYWKSIGAKVVATRQTRDLMKSDWAEIVAFTRKGLPEYPDLPLVLPNVVHDGDFTLQEGKVRAFYAGPAHTPDGIFVYFPDEQVLYGNCILKEKLGNLSFANVKAYPQTIERLKAMKLPIKTVIGGHDSPLHGPELIDHYEALIKAVPQS	ORF_OK	TRUE_HIT	mmkgwikcglagavvllasfwggsvraagislkqvsgpvyvvednyyvkensmvyfgakgvtvvgatwtpdtarelhklikrvsskpvlevintnyhtdraggnaywksigakvvatrqtrdlmksdwaeivaftrkglpeypdlplvlpnvvhdgdftlqegkvralyagpahtpdgifvyfpdeqvlygncilkeklgnlsfadvkaypktlerlkalklpiktvigghdsplhgpelidhyealikaaaks	MMKGWIKFTLAGAVVLMASFWGGSVRAAGISLKQVSGPVYVVEDNYYVKENSMVYFGAKGVTVVGATWTPDTARELHKLIKRVSSKPVLEVINTNYHTDRAGGNAYWKSIGAKVVATRQTRDLMKSDWAEIVAFTRKGLPEYPDLPLVLPNVVHDGDFTLQEGKVRAFYAGPAHTPDGIFVYFPDEQVLYGNCILKEKLGNLSFANVKAYPQTIERLKAMKLPIKTVIGGHDSPLHGPELIDHYEALIKAVPQS	1	254	99.6063	0	0	0	253	Cluster_4	ChpA_family_subclass_B2_metallo-beta-lactamase_ImiS_NG_050415.1_cds_WP_063865298.1_1	Cluster_4	SP_Sec_SPI_	26-27	SP_Sec_SPI_	26-27	N_Y_H_T_D	C	H	.	.
B2_1003	GCF_000819745.1	105751	105751	Aeromonas_bestiarum	Bacteria-Pseudomonadota-Gammaproteobacteria-Aeromonadales-Aeromonadaceae-Aeromonas-	4690820	NZ_CDDA01000037.1	class_B2	528.9	+	215738	216494	215739	216500	ATGAAAGGTTGGATAAAGTGCGGGCTGGCCGGGGCCCTGGTGCTGGTGGCGAGCTTCTGGGGTGGCAGCGTGCATGCGGCGGCGATCTCCCTCACTCAGGTGAGCGGCCCCGTGTATGTGGTTGAAGATAACTACTATGTACAGGAAAACTCCATGGTCTATTTCGGGGCCAAGGGGGTGACGGTAGTGGGGGCGACCTGGACGCCGGATACCGCCCGCGAGCTGCACAAGCTGATCAAGCGGGTCAGCAGCAAGCCCGTGCTGGAGGTGATCAACACCAACTATCACACCGACAGGGCGGGGGGTAACGCCTACTGGAAGTCCATCGGCGCCAGGGTGGTATCGACGCGCCAGACCCGGGATCTGATGAAGAGCGACTGGGCCGAAATTGTCGCCTTT…	WP_043557559.1	CphA_family_subclass_B2_metallo-beta-lactamase	MKGWIKCGLAGALVLVASFWGGSVHAAAISLTQVSGPVYVVEDNYYVQENSMVYFGAKGVTVVGATWTPDTARELHKLIKRVSSKPVLEVINTNYHTDRAGGNAYWKSIGARVVSTRQTRDLMKSDWAEIVAFTRKGLPEYPDLPLVLPNEVHDGDFTLQEGKLRAFYAGPAHTPDGIFVYFPEEQVLYGNCILKEKLGNLSFADVKAYPQTLARLKAMKLPIKIVVGGHDSPLHGPELIDHYETLIKAAPQV	ORF_OK	TRUE_HIT	mmkgwikcglagavvllasfwggsvraagislkqvsgpvyvvednyyvkensmvyfgakgvtvvgatwtpdtarelhklikrvsskpvlevintnyhtdraggnaywksigakvvatrqtrdlmksdwaeivaftrkglpeypdlplvlpnvvhdgdftlqegkvralyagpahtpdgifvyfpdeqvlygncilkeklgnlsfadvkaypktlerlkalklpiktvigghdsplhgpelidhyealikaaak	MMKGWIKCGLAGALVLVASFWGGSVHAAAISLTQVSGPVYVVEDNYYVQENSMVYFGAKGVTVVGATWTPDTARELHKLIKRVSSKPVLEVINTNYHTDRAGGNAYWKSIGARVVSTRQTRDLMKSDWAEIVAFTRKGLPEYPDLPLVLPNEVHDGDFTLQEGKLRAFYAGPAHTPDGIFVYFPEEQVLYGNCILKEKLGNLSFADVKAYPQTLARLKAMKLPIKIVVGGHDSPLHGPELIDHYETLIKAAPQ	1	253	99.2126	0	0	0	253	Cluster_4	ChpA_family_subclass_B2_metallo-beta-lactamase_ImiS_NG_050415.1_cds_WP_063865298.1_1	Cluster_4	SP_Sec_SPI_	26-27	SP_Sec_SPI_	26-27	N_Y_H_T_D	C	H	.	.
B2_1004	GCF_000819825.1	73010	73010	Aeromonas_encheleia	Bacteria-Pseudomonadota-Gammaproteobacteria-Aeromonadales-Aeromonadaceae-Aeromonas-	4472527	NZ_CDDI01000013.1	class_B2	452.1	-	11997	12660	11995	12678	GATCTATGGGGTCAAATCCAGGTGAGCGGCCCCGTCTATGTGGTGGAGGATGACTACTACCTCAGGGAGAACTCCATGGTGTACTTCGGCGTCGAGGGGGTGACGGTGGTGGGGGCGACCTGGACGCCGGATACCGCCCGCGAGTTGCACAAGCTTATCAAGAAGGTCAGTCGCAAGCCGGTGCTGGAGGTGATCAACACCAACTACCACACCGATAGGGCCGGCGGTAACGCCTACTGGAAGTCCATCGGCGCGAAAGTGGTCTCGACCCGCCAGACCCGGGATCTGATGCAGAGCGACTGGCAGACCATAGTCGACTTCACCCGCAAGGGGCTGCCGGACTACCCGGACCTGCCGCTGGTGCTGCCGAACGAGGTGCACGACGGCGACTTCAGCCTG…	WP_042652865.1	subclass_B2_metallo-beta-lactamase_partial	DLWGQIQVSGPVYVVEDDYYLRENSMVYFGVEGVTVVGATWTPDTARELHKLIKKVSRKPVLEVINTNYHTDRAGGNAYWKSIGAKVVSTRQTRDLMQSDWQTIVDFTRKGLPDYPDLPLVLPNEVHDGDFSLQDGKVRAFYLGPAHTPDGIFVYFPDEQVLYGNCILKEKLGNLAFADLKAYPQTLARLKAMKLPLKTIVGGHDSPLHGPELIDHYQALLAEAPRS	ORF_OK	TRUE_HIT	kqvsgpvyvvednyyvkensmvyfgakgvtvvgatwtpdtarelhklikrvsskpvlevintnyhtdraggnaywksigakvvatrqtrdlmksdwaeivaftrkglpeypdlplvlpnvvhdgdftlqegkvralyagpahtpdgifvyfpdeqvlygncilkeklgnlsfadvkaypktlerlkalklpiktvigghdsplhgpelidhyealikaaaks	IQVSGPVYVVEDDYYLRENSMVYFGVEGVTVVGATWTPDTARELHKLIKKVSRKPVLEVINTNYHTDRAGGNAYWKSIGAKVVSTRQTRDLMQSDWQTIVDFTRKGLPDYPDLPLVLPNEVHDGDFSLQDGKVRAFYLGPAHTPDGIFVYFPDEQVLYGNCILKEKLGNLAFADLKAYPQTLARLKAMKLPLKTIVGGHDSPLHGPELIDHYQALLAEAPRS	33	254	87.0079	0	0	0	227	Cluster_13	CLUSTER_NOT_IN_NCBI_AMR_REF_DB	Cluster_12	OTHER	0	OTHER	0	N_Y_H_T_D	C	H	.	.
B2_1005	GCF_000819955.1	650	650	Aeromonas_jandaei	Bacteria-Pseudomonadota-Gammaproteobacteria-Aeromonadales-Aeromonadaceae-Aeromonas-	4500350	NZ_CDBV01000017.1	class_B2	544.1	+	122979	123738	122992	123741	ATGAAATGCGGATTGGCCGGAGCCGTGGTGCTGATGGCGAGTTTTTGGGGCGGCAGCGTGCGGGCGGCGGGGATCTCCCTCAAGCAGGTGAGCGGCCCTGTCTATGTGGTGGAGGATAACTACTACGTCAAAGAGAACTCCATGGTCTATTTCGGGGCCAAGGGGGTGACTGCGGTGGGGGCGACCTGGACGCCGGATACCGCCCGCGAGTTGCACAAGCTGATCAAACGGGTCAGCAGCAAGCCGGTGCTGGAGGTGATCAACACCAACTACCACACCGATCGGGCGGGCGGTAACGCCTACTGGAAGTCCATCGGGGCCAAGGTGGTGGCGACGCGCCAGACCCGGGATCTGATGAAGAGCGACTGGGCCGAGATTGTTGCCTTTACCCGCAAGGGG…	WP_225628326.1	CphA_family_subclass_B2_metallo-beta-lactamase	MKCGLAGAVVLMASFWGGSVRAAGISLKQVSGPVYVVEDNYYVKENSMVYFGAKGVTAVGATWTPDTARELHKLIKRVSSKPVLEVINTNYHTDRAGGNAYWKSIGAKVVATRQTRDLMKSDWAEIVAFTRKGLPEYPDLPLVLPNVVHDGDFKLQDGKVRAFYAGPAHTPDGIFVYFPDEQVLYGNCILKEKLGNLSFANVKEYPQTIERLKAMKLPIKTVIGGHDSPLHGPELIDHYEELIKAAPQS	ORF_OK	TRUE_HIT	mmkgwikcglagavvllasfwggsvraagislkqvsgpvyvvednyyvkensmvyfgakgvtvvgatwtpdtarelhklikrvsskpvlevintnyhtdraggnaywksigakvvatrqtrdlmksdwaeivaftrkglpeypdlplvlpnvvhdgdftlqegkvralyagpahtpdgifvyfpdeqvlygncilkeklgnlsfadvkaypktlerlkalklpiktvigghdsplhgpelidhyealikaaaks	MMKGWMKCGLAGAVVLMASFWGGSVRAAGISLKQVSGPVYVVEDNYYVKENSMVYFGAKGVTAVGATWTPDTARELHKLIKRVSSKPVLEVINTNYHTDRAGGNAYWKSIGAKVVATRQTRDLMKSDWAEIVAFTRKGLPEYPDLPLVLPNVVHDGDFKLQDGKVRAFYAGPAHTPDGIFVYFPDEQVLYGNCILKEKLGNLSFANVKEYPQTIERLKAMKLPIKTVIGGHDSPLHGPELIDHYEELIKAAPQS	1	254	99.6063	0	0	0	249	Cluster_4	ChpA_family_subclass_B2_metallo-beta-lactamase_ImiS_NG_050415.1_cds_WP_063865298.1_1	Cluster_4	SP_Sec_SPI_	22-23	SP_Sec_SPI_	22-23	N_Y_H_T_D	C	H	.	.
B2_1006	GCF_000820005.1	600645	600645	Aeromonas_piscicola	Bacteria-Pseudomonadota-Gammaproteobacteria-Aeromonadales-Aeromonadaceae-Aeromonas-	5177970	NZ_CDBL01000052.1	class_B2	536.1	+	446133	446889	446131	446895	ATGATGAAAGGTTGGATGAAATGCGGGCTGGCCGGTGCCCTGGTGCTGATGGCGAGTTTCTGGGGCGGCAGCGTGCATGCGGCAGCGATCTCCCTCACTCAGGTGAGCGGCCCGGTCTATGTGGTGGAGGACAACTACTACGTCAAAGAGAACTCCATGGTCTATTTCGGGGCCAAGGGGGTGACGGTAGTGGGGGCGACCTGGACGCCGGATACCGCCCGCGAGCTGCACAAGTTGATCAAGCGGGTCAGCAGCAAGCCCGTGCTGGAGGTGATCAACACCAACTACCACACCGACCGGGCGGGCGGTAACGCCTACTGGAAGTCCATCGGGGCCAAGGTGGTGGCGACTCGCCATACCCGGGATCTGATGAAGAGCGACTGGGCCGAGATTGTCGCC…	WP_082030409.1	CphA_family_subclass_B2_metallo-beta-lactamase	MMKGWMKCGLAGALVLMASFWGGSVHAAAISLTQVSGPVYVVEDNYYVKENSMVYFGAKGVTVVGATWTPDTARELHKLIKRVSSKPVLEVINTNYHTDRAGGNAYWKSIGAKVVATRHTRDLMKSDWAEIVAFTRKGLPEYPDLPLVLPNVVHDGDFTLQEGKVRAFYLGPAHTPDGIFVYFPDQQVLYGNCILKEKLGNLSFADVKAYPQTLERLKAMKLPIKIVVGGHDSPLHGPELIDHYQSLIKAAPQA	ORF_OK	TRUE_HIT	mmkgwikcglagavvllasfwggsvraagislkqvsgpvyvvednyyvkensmvyfgakgvtvvgatwtpdtarelhklikrvsskpvlevintnyhtdraggnaywksigakvvatrqtrdlmksdwaeivaftrkglpeypdlplvlpnvvhdgdftlqegkvralyagpahtpdgifvyfpdeqvlygncilkeklgnlsfadvkaypktlerlkalklpiktvigghdsplhgpelidhyealikaaak	MMKGWMKCGLAGALVLMASFWGGSVHAAAISLTQVSGPVYVVEDNYYVKENSMVYFGAKGVTVVGATWTPDTARELHKLIKRVSSKPVLEVINTNYHTDRAGGNAYWKSIGAKVVATRHTRDLMKSDWAEIVAFTRKGLPEYPDLPLVLPNVVHDGDFTLQEGKVRAFYLGPAHTPDGIFVYFPDQQVLYGNCILKEKLGNLSFADVKAYPQTLERLKAMKLPIKIVVGGHDSPLHGPELIDHYQSLIKAAPQ	1	253	99.2126	0	0	0	254	Cluster_4	ChpA_family_subclass_B2_metallo-beta-lactamase_ImiS_NG_050415.1_cds_WP_063865298.1_1	Cluster_4	SP_Sec_SPI_	27-28	SP_Sec_SPI_	27-28	N_Y_H_T_D	C	H	.	.
B2_1007	GCF_000820065.1	29491	645	Aeromonas_salmonicida_subsp_salmonicida	Bacteria-Pseudomonadota-Gammaproteobacteria-Aeromonadales-Aeromonadaceae-Aeromonas-	4740147	NZ_CDDW01000064.1	class_B2	541.4	-	11274	12030	11269	12030	ATGAAAGGTTGGATAAAGTGCGGGCTGGCCGGAGCTGTGGTGCTGGTGGCGAGTTTCTGGGGCGGCAGCGTGCATGCGGCGGCGATCTCCCTCACTCAGGTAAGCGGCCCTGTCTATGTGGTGGAGGATAACTACTACGTCAAAGAGAACTCCATGGTTTATTTCGGAGCCAAGGGAGTGACGATAGTGGGGGCGACCTGGACGCCGGATACCGCCCGCGAGCTGCACAAGCTGATCAAACGGGTCAGCAACAAGCCTGTGCTGGAGGTGATCAACACCAACTACCACACGGACAGGGCAGGGGGTAACGCCTACTGGAAGTCCATCGGTGCCAAGGTGGTCTCGACCCGCCAGACCCGGGATCTGATGAAGAGCGACTGGGCCGAGATCGTCGCCTTT…	WP_005320513.1	CphA_family_subclass_B2_metallo-beta-lactamase	MKGWIKCGLAGAVVLVASFWGGSVHAAAISLTQVSGPVYVVEDNYYVKENSMVYFGAKGVTIVGATWTPDTARELHKLIKRVSNKPVLEVINTNYHTDRAGGNAYWKSIGAKVVSTRQTRDLMKSDWAEIVAFTRKGLPEYPDLPLVLPNVVHDGDFNLQEGKVRAFYAGPAHTPDGIFVYFPDQQVLYGNCILKEKLGNLSFADVKAYPQTLERLKAMKLPIKIVVGGHDSPLHGPELIDHYQALIKAAPQA	ORF_OK	TRUE_HIT	mmkgwikcglagavvllasfwggsvraagislkqvsgpvyvvednyyvkensmvyfgakgvtvvgatwtpdtarelhklikrvsskpvlevintnyhtdraggnaywksigakvvatrqtrdlmksdwaeivaftrkglpeypdlplvlpnvvhdgdftlqegkvralyagpahtpdgifvyfpdeqvlygncilkeklgnlsfadvkaypktlerlkalklpiktvigghdsplhgpelidhyealikaaak	MMKGWIKCGLAGAVVLVASFWGGSVHAAAISLTQVSGPVYVVEDNYYVKENSMVYFGAKGVTIVGATWTPDTARELHKLIKRVSNKPVLEVINTNYHTDRAGGNAYWKSIGAKVVSTRQTRDLMKSDWAEIVAFTRKGLPEYPDLPLVLPNVVHDGDFNLQEGKVRAFYAGPAHTPDGIFVYFPDQQVLYGNCILKEKLGNLSFADVKAYPQTLERLKAMKLPIKIVVGGHDSPLHGPELIDHYQALIKAAPQ	1	253	99.2126	0	0	0	253	Cluster_4	ChpA_family_subclass_B2_metallo-beta-lactamase_ImiS_NG_050415.1_cds_WP_063865298.1_1	Cluster_4	SP_Sec_SPI_	26-27	SP_Sec_SPI_	26-27	N_Y_H_T_D	C	H	.	.
B2_1008	GCF_000820145.1	646	646	Aeromonas_sobria	Bacteria-Pseudomonadota-Gammaproteobacteria-Aeromonadales-Aeromonadaceae-Aeromonas-	4683669	NZ_CDBW01000025.1	class_B2	548.4	+	38356	39115	38357	39118	ATGAAAGGTTGGATAAAGTGCACATTGGCCGGGGCCGTGGTGCTGATGGCGAGTTTCTGGGGTGGCAGCGTGCGGGCGGCGGGGATGTCGCTGATGCAGGTGAGCGGCCCTGTCTATGTTGTTGAAGATAACTACTACGTCAAAGAGAACTCCATGGTCTATTTCGGGGCCAAGGGGGTGACGGTGGTGGGGGCGACCTGGACGCCGGATACCGCCCGCGAGCTGCACAAGCTGATCAAACGGGTCAGCAGCAAACCGGTGCTGGAGGTGATCAACACCAACTACCACACCGACCGAGCGGGCGGTAACGCCTACTGGAAGTCCATCGGGGCCAAGGTGGTATCGACTCGCCAGACCCGGGATCTGATGAAGAGCGACTGGGCCGAGATTGTCGCCTTT…	WP_042021466.1	CphA_family_subclass_B2_metallo-beta-lactamase	MKGWIKCTLAGAVVLMASFWGGSVRAAGMSLMQVSGPVYVVEDNYYVKENSMVYFGAKGVTVVGATWTPDTARELHKLIKRVSSKPVLEVINTNYHTDRAGGNAYWKSIGAKVVSTRQTRDLMKSDWAEIVAFTRKGLPEYPDLPLVLPNVVHDGDFKLQEGKVRAFYAGPAHTPDGIFVYFPDQQVLYGNCILKEKLGNLSFANVKEYPQTIERLKAMKLPIKTVIGGHDSPLHGPELIDHYEELIKAAPQS	ORF_OK	TRUE_HIT	mmkgwikcglagavvllasfwggsvraagislkqvsgpvyvvednyyvkensmvyfgakgvtvvgatwtpdtarelhklikrvsskpvlevintnyhtdraggnaywksigakvvatrqtrdlmksdwaeivaftrkglpeypdlplvlpnvvhdgdftlqegkvralyagpahtpdgifvyfpdeqvlygncilkeklgnlsfadvkaypktlerlkalklpiktvigghdsplhgpelidhyealikaaaks	MMKGWIKCTLAGAVVLMASFWGGSVRAAGMSLMQVSGPVYVVEDNYYVKENSMVYFGAKGVTVVGATWTPDTARELHKLIKRVSSKPVLEVINTNYHTDRAGGNAYWKSIGAKVVSTRQTRDLMKSDWAEIVAFTRKGLPEYPDLPLVLPNVVHDGDFKLQEGKVRAFYAGPAHTPDGIFVYFPDQQVLYGNCILKEKLGNLSFANVKEYPQTIERLKAMKLPIKTVIGGHDSPLHGPELIDHYEELIKAAPQS	1	254	99.6063	0	0	0	253	Cluster_4	ChpA_family_subclass_B2_metallo-beta-lactamase_ImiS_NG_050415.1_cds_WP_063865298.1_1	Cluster_4	SP_Sec_SPI_	26-27	SP_Sec_SPI_	26-27	N_Y_H_T_D	C	H	.	.
B2_1009	GCF_000820225.1	197701	654	Aeromonas_veronii_bv_veronii	Bacteria-Pseudomonadota-Gammaproteobacteria-Aeromonadales-Aeromonadaceae-Aeromonas-	4516420	NZ_CDDK01000012.1	class_B2	549.4	+	24291	25050	24289	25053	ATGATGAAAAGTTGGATGAAGTGCACATTGGCCGGGGCCGTGGTGCTGATGGCGAGTTTCTGGGGCGGCAGCGTGCGGGCGGCGGGGATCTCCCTCAAGCAGGTAAGCGGCCCGGTGTATGTGGTGGAGGATAACTACTACGTAAAGGAAAACTCCATGGTCTATTTCGGGGCCAAGGGGGTGACTGTGGTGGGGGCGACCTGGACGCCGGATACCGCCCGCGAGCTGCACAAGCTGATCAAGCGGGTCAGCAGCAAGCCGGTGCTGGAGGTGATCAACACCAACTACCACACCGATCGGGCGGGTGGTAACGCCTACTGGAAGTCCATTGGCGCCAAGGTGGTCTCGACCCGCCAGACCCGGGATCTGATGAAGAGCGACTGGGCCGAGATTGTCGCC…	WP_013723489.1	CphA_family_subclass_B2_metallo-beta-lactamase	MMKSWMKCTLAGAVVLMASFWGGSVRAAGISLKQVSGPVYVVEDNYYVKENSMVYFGAKGVTVVGATWTPDTARELHKLIKRVSSKPVLEVINTNYHTDRAGGNAYWKSIGAKVVSTRQTRDLMKSDWAEIVAFTRKGLPEYPDLPLVLPNVVHDGDFTLQEGKVRAFYAGPAHTPDGIFVYFPDEQVLYGNCILKEKLGNLSFANVKAYPQTIERLKAMKLPIKTVIGGHDSPLHGPELIDHYEELIKAAPQS	ORF_OK	TRUE_HIT	mmkgwikcglagavvllasfwggsvraagislkqvsgpvyvvednyyvkensmvyfgakgvtvvgatwtpdtarelhklikrvsskpvlevintnyhtdraggnaywksigakvvatrqtrdlmksdwaeivaftrkglpeypdlplvlpnvvhdgdftlqegkvralyagpahtpdgifvyfpdeqvlygncilkeklgnlsfadvkaypktlerlkalklpiktvigghdsplhgpelidhyealikaaaks	MMKSWMKCTLAGAVVLMASFWGGSVRAAGISLKQVSGPVYVVEDNYYVKENSMVYFGAKGVTVVGATWTPDTARELHKLIKRVSSKPVLEVINTNYHTDRAGGNAYWKSIGAKVVSTRQTRDLMKSDWAEIVAFTRKGLPEYPDLPLVLPNVVHDGDFTLQEGKVRAFYAGPAHTPDGIFVYFPDEQVLYGNCILKEKLGNLSFANVKAYPQTIERLKAMKLPIKTVIGGHDSPLHGPELIDHYEELIKAAPQS	1	254	99.6063	0	0	0	254	Cluster_4	ChpA_family_subclass_B2_metallo-beta-lactamase_ImiS_NG_050415.1_cds_WP_063865298.1_1	Cluster_4	SP_Sec_SPI_	27-28	SP_Sec_SPI_	27-28	N_Y_H_T_D	C	H	.	.
B2_101	GCF_006246345.1	196024	196024	Aeromonas_dhakensis	Bacteria-Pseudomonadota-Gammaproteobacteria-Aeromonadales-Aeromonadaceae-Aeromonas-	4804366	NZ_NKWP01000003.1	class_B2	536.5	-	12089	12848	12087	12848	ATGAAAGGTTGGATAAAGTGCGGATTGGCCGGAGCCGTGGTGCTGATGGCGAGTTTCTGGGGTGGCAGCGTGCGTGCGGCGGGGATGTCGCTGACGCAGGTGAGCGGCCCTGTCTATGTGGTGGAGGACAACTACTACGTCAAAGAGAACTCCATGGTCTATTTCGGGGCCAGGGGGGTGACTGTGGTGGGGGCAACCTGGACGCCGGATACCGCCCGCGAGCTGCACAAGCTGATCAAACGGGTCAGCCGCAAGCCGGTGCTGGAGGTGATCAACACCAACTACCACACCGACCGTGCCGGCGGTAACGCCTACTGGAAGTCCATCGGGGCCAAGGTGGTGGCGACGCGCCAGACCCGGGATCTGATGAAGAGCGACTGGGCCGAGATTGTCGCCTTT…	WP_240035829.1	CphA_family_subclass_B2_metallo-beta-lactamase	MKGWIKCGLAGAVVLMASFWGGSVRAAGMSLTQVSGPVYVVEDNYYVKENSMVYFGARGVTVVGATWTPDTARELHKLIKRVSRKPVLEVINTNYHTDRAGGNAYWKSIGAKVVATRQTRDLMKSDWAEIVAFTRKGLPEYPDLPLVLPNVVHEGYFTLQEGKLRAFYAGPAHTPDGIFVYFPDEQVLYGNCILKEKLGNLSFADVKAYPQTLERLKAMKLPIKTVVGGHDSPLHGPELIDHYEALIKAVPQS	ORF_OK	TRUE_HIT	mmkgwikcglagavvllasfwggsvraagislkqvsgpvyvvednyyvkensmvyfgakgvtvvgatwtpdtarelhklikrvsskpvlevintnyhtdraggnaywksigakvvatrqtrdlmksdwaeivaftrkglpeypdlplvlpnvvhdgdftlqegkvralyagpahtpdgifvyfpdeqvlygncilkeklgnlsfadvkaypktlerlkalklpiktvigghdsplhgpelidhyealikaaaks	MMKGWIKCGLAGAVVLMASFWGGSVRAAGMSLTQVSGPVYVVEDNYYVKENSMVYFGARGVTVVGATWTPDTARELHKLIKRVSRKPVLEVINTNYHTDRAGGNAYWKSIGAKVVATRQTRDLMKSDWAEIVAFTRKGLPEYPDLPLVLPNVVHEGYFTLQEGKLRAFYAGPAHTPDGIFVYFPDEQVLYGNCILKEKLGNLSFADVKAYPQTLERLKAMKLPIKTVVGGHDSPLHGPELIDHYEALIKAVPQS	1	254	99.6063	0	0	0	253	Cluster_4	ChpA_family_subclass_B2_metallo-beta-lactamase_ImiS_NG_050415.1_cds_WP_063865298.1_1	Cluster_4	SP_Sec_SPI_	26-27	SP_Sec_SPI_	26-27	N_Y_H_T_D	C	H	.	.
B2_1010	GCF_000820245.1	656	656	Aeromonas_allosaccharophila	Bacteria-Pseudomonadota-Gammaproteobacteria-Aeromonadales-Aeromonadaceae-Aeromonas-	4708594	NZ_CDCB01000120.1	class_B2	548.3	-	9392	10151	9390	10151	ATGAAAGGTTGGATAAAGTGCGGATTGGCCGGGGCTGTGGTGCTGATGGCGAGTTTCTGGGGCGGCAGCGTGCGGGCGGCGGGGATGTCGCTGACGCAGGTGAGCGGCCCCGTGTATGTTGTTGAAGATAACTACTACGTCAAAGAGAACTCCATGGTCTATTTCGGGGCCAAGGGGGTGACGGTGGTGGGGGCGACCTGGACGCCGGATACCGCCCGCGAGCTGCACAAGCTGATCAAACGGGTCAGCAGCAAGCCGGTGCTGGAGGTGATCAACACCAACTACCACACCGACCGGGCAGGCGGTAACGCCTACTGGAAGTCCATCGGCGCCAAGGTGGTGGCGACGCGCCAGACCCGGGATCTGATGAAGAGCGACTGGGCCGAGATTGTCGCCTTT…	WP_042063527.1	CphA_family_subclass_B2_metallo-beta-lactamase	MKGWIKCGLAGAVVLMASFWGGSVRAAGMSLTQVSGPVYVVEDNYYVKENSMVYFGAKGVTVVGATWTPDTARELHKLIKRVSSKPVLEVINTNYHTDRAGGNAYWKSIGAKVVATRQTRDLMKSDWAEIVAFTRKGLPEYPDLPLVLPNVVHDGDFTLQEGKVRAFFAGPAHTPDGIFVYFPDQQVLYGNCILKETLGNLSFANVKAYPQTIERLKAMKLPIKTVIGGHDSPLHGPELIDHYEALIKAAPQS	ORF_OK	TRUE_HIT	mmkgwikcglagavvllasfwggsvraagislkqvsgpvyvvednyyvkensmvyfgakgvtvvgatwtpdtarelhklikrvsskpvlevintnyhtdraggnaywksigakvvatrqtrdlmksdwaeivaftrkglpeypdlplvlpnvvhdgdftlqegkvralyagpahtpdgifvyfpdeqvlygncilkeklgnlsfadvkaypktlerlkalklpiktvigghdsplhgpelidhyealikaaaks	MMKGWIKCGLAGAVVLMASFWGGSVRAAGMSLTQVSGPVYVVEDNYYVKENSMVYFGAKGVTVVGATWTPDTARELHKLIKRVSSKPVLEVINTNYHTDRAGGNAYWKSIGAKVVATRQTRDLMKSDWAEIVAFTRKGLPEYPDLPLVLPNVVHDGDFTLQEGKVRAFFAGPAHTPDGIFVYFPDQQVLYGNCILKETLGNLSFANVKAYPQTIERLKAMKLPIKTVIGGHDSPLHGPELIDHYEALIKAAPQS	1	254	99.6063	0	0	0	253	Cluster_4	ChpA_family_subclass_B2_metallo-beta-lactamase_ImiS_NG_050415.1_cds_WP_063865298.1_1	Cluster_4	SP_Sec_SPI_	26-27	SP_Sec_SPI_	26-27	N_Y_H_T_D	C	H	.	.
B2_1011	GCF_000820285.1	654	654	Aeromonas_veronii	Bacteria-Pseudomonadota-Gammaproteobacteria-Aeromonadales-Aeromonadaceae-Aeromonas-	4430813	NZ_CDDU01000032.1	class_B2	546.4	+	129736	130495	129734	130498	ATGATGAAAGGTTGGATGAAGTGCGGGTTGGCCGGGGCCGTGGTGCTGATGGCGAGTTTCTGGGGTGGCAGCGTGCGGGCGGCAGGGATCTCCCTCAAGCAGGTGAGCGGCCCGGTCTATGTGGTGGAGGACAACTACTACGTCAAAGAGAACTCCATGGTCTATTTCGGGGCCAAGGGGGTGACTGTGGTGGGGGCGACCTGGACGCCGGATACCGCTCGCGAGCTGCACAAGCTGATCAAACGGGTCAGCAGCAAGCCGGTGCTGGAGGTGATCAACACCAACTACCACACCGATCGGGCGGGTGGTAATGCCTACTGGAAGTCCATCGGGGCCAAGGTGGTGGCGACGCGCCAGACCCGGGATCTGATGAAGAGCGACTGGGCCGAGATTGTCGCC…	WP_080764948.1	CphA_family_subclass_B2_metallo-beta-lactamase	MMKGWMKCGLAGAVVLMASFWGGSVRAAGISLKQVSGPVYVVEDNYYVKENSMVYFGAKGVTVVGATWTPDTARELHKLIKRVSSKPVLEVINTNYHTDRAGGNAYWKSIGAKVVATRQTRDLMKSDWAEIVAFTRKGLPEYPDLPLVLPNVVHDGDFKLQDGKVRAFYAGPAHTPDGIFVYFPDEQVLYGNCILKEKLGNLSFANVKEYPQTIERLKAMKLPIKTVIGGHDSPLHGPELIDHYEELIKAAPQS	ORF_OK	TRUE_HIT	mmkgwikcglagavvllasfwggsvraagislkqvsgpvyvvednyyvkensmvyfgakgvtvvgatwtpdtarelhklikrvsskpvlevintnyhtdraggnaywksigakvvatrqtrdlmksdwaeivaftrkglpeypdlplvlpnvvhdgdftlqegkvralyagpahtpdgifvyfpdeqvlygncilkeklgnlsfadvkaypktlerlkalklpiktvigghdsplhgpelidhyealikaaaks	MMKGWMKCGLAGAVVLMASFWGGSVRAAGISLKQVSGPVYVVEDNYYVKENSMVYFGAKGVTVVGATWTPDTARELHKLIKRVSSKPVLEVINTNYHTDRAGGNAYWKSIGAKVVATRQTRDLMKSDWAEIVAFTRKGLPEYPDLPLVLPNVVHDGDFKLQDGKVRAFYAGPAHTPDGIFVYFPDEQVLYGNCILKEKLGNLSFANVKEYPQTIERLKAMKLPIKTVIGGHDSPLHGPELIDHYEELIKAAPQS	1	254	99.6063	0	0	0	254	Cluster_4	ChpA_family_subclass_B2_metallo-beta-lactamase_ImiS_NG_050415.1_cds_WP_063865298.1_1	Cluster_4	SP_Sec_SPI_	27-28	SP_Sec_SPI_	27-28	N_Y_H_T_D	C	H	.	.
B2_1012	GCF_000820305.1	196024	196024	Aeromonas_dhakensis	Bacteria-Pseudomonadota-Gammaproteobacteria-Aeromonadales-Aeromonadaceae-Aeromonas-	4711881	NZ_CDBH01000055.1	class_B2	544	+	269	1028	270	1031	ATGAAAGGTTGGATAAAGTGCGGATTGGCCGGGGCCCTGGTGCTGATGGCGAGTTTCTGGGGTGGCAGCGTGCGGGCGGCGGGGATGTCGCTGACGCAGGTGAGCGGCCCTGTCTACGTTGTCGAGGACAACTACTACATACAGGAAAACTCCATGGTCTATTTCGGGGCCAGGGGGGTGACTGTGGTGGGGGCAACCTGGACGCCGGATACCGCCCGCGAGCTGCACAAGCTGATCAAACGGGTCAGCCGCAAGCCGGTGCTGGAGGTGATCAACACCAACTACCACACCGACCGTGCCGGCGGTAACGCCTACTGGAAGTCCATCGGAGCCAAGGTGGTATCGACCCGTCAGACCCGGGATCTGATGAAGAGCGACTGGGCCGAGATTGTCGCCTTT…	WP_042051295.1	CphA_family_subclass_B2_metallo-beta-lactamase	MKGWIKCGLAGALVLMASFWGGSVRAAGMSLTQVSGPVYVVEDNYYIQENSMVYFGARGVTVVGATWTPDTARELHKLIKRVSRKPVLEVINTNYHTDRAGGNAYWKSIGAKVVSTRQTRDLMKSDWAEIVAFTRKGLPEYPDLPLVLPNVVHEGDFTLQEGKLRAFYAGPAHTPDGIFVYFPDEQVLYGNCILKEKLGNLSFADVKAYPQTLERLKAMKLPIKTVVGGHDSPLHGPELIDHYEALIKAAPQS	ORF_OK	TRUE_HIT	mmkgwikcglagavvllasfwggsvraagislkqvsgpvyvvednyyvkensmvyfgakgvtvvgatwtpdtarelhklikrvsskpvlevintnyhtdraggnaywksigakvvatrqtrdlmksdwaeivaftrkglpeypdlplvlpnvvhdgdftlqegkvralyagpahtpdgifvyfpdeqvlygncilkeklgnlsfadvkaypktlerlkalklpiktvigghdsplhgpelidhyealikaaaks	MMKGWIKCGLAGALVLMASFWGGSVRAAGMSLTQVSGPVYVVEDNYYIQENSMVYFGARGVTVVGATWTPDTARELHKLIKRVSRKPVLEVINTNYHTDRAGGNAYWKSIGAKVVSTRQTRDLMKSDWAEIVAFTRKGLPEYPDLPLVLPNVVHEGDFTLQEGKLRAFYAGPAHTPDGIFVYFPDEQVLYGNCILKEKLGNLSFADVKAYPQTLERLKAMKLPIKTVVGGHDSPLHGPELIDHYEALIKAAPQS	1	254	99.6063	0	0	0	253	Cluster_4	ChpA_family_subclass_B2_metallo-beta-lactamase_ImiS_NG_050415.1_cds_WP_063865298.1_1	Cluster_4	SP_Sec_SPI_	26-27	SP_Sec_SPI_	26-27	N_Y_H_T_D	C	H	.	.
B2_1013	GCF_000820365.1	654	654	Aeromonas_veronii	Bacteria-Pseudomonadota-Gammaproteobacteria-Aeromonadales-Aeromonadaceae-Aeromonas-	4410797	NZ_CDBU01000004.1	class_B2	545.5	-	12493	13252	12491	13255	ATGATGAAAAGTTGGATGAAGTGTGGATTGGCCGGGGCCGTGGTGCTGATGGCGAGTTTCTGGGGTGGCAGCGTGCGGGCGGCGGGGATCTCCCTTAAGCAGGTGAGCGGCCCTGTTTACGTGGTTGAAGATAACTACTACGTAAAGGAAAACTCCATGATCTATTTCGGGGCCAAGGGGGTGACGGTGGTGGGGGCGACCTGGACGCCGGATACCGCCCGCGAGCTGCACAAGCTGATCAAGCGGGTCAGCAGCAAGCCGGTGCTGGAGGTGATCAACACCAACTACCACACCGATCGGGCGGGCGGTAACGCCTACTGGAAGTCCATCGGGGCCAAGGTGGTGGCGACGCGCCAGACCAGGGATCTGATGAAGAGCGACTGGGCCGAGATTGTCGCC…	WP_080771364.1	CphA_family_subclass_B2_metallo-beta-lactamase	MMKSWMKCGLAGAVVLMASFWGGSVRAAGISLKQVSGPVYVVEDNYYVKENSMIYFGAKGVTVVGATWTPDTARELHKLIKRVSSKPVLEVINTNYHTDRAGGNAYWKSIGAKVVATRQTRDLMKSDWAEIVAFTRKGLPEYPDLPLVLPNVVHDGDFTLQEGKVRAFYAGPAHTPDGIFVYFPDEQVLYGNCILKEKLGNLSFANVKAYPQTIERLKAMKLPIKTVIGGHDSPLHGPELIDHYEELIKAAPQS	ORF_OK	TRUE_HIT	mmkgwikcglagavvllasfwggsvraagislkqvsgpvyvvednyyvkensmvyfgakgvtvvgatwtpdtarelhklikrvsskpvlevintnyhtdraggnaywksigakvvatrqtrdlmksdwaeivaftrkglpeypdlplvlpnvvhdgdftlqegkvralyagpahtpdgifvyfpdeqvlygncilkeklgnlsfadvkaypktlerlkalklpiktvigghdsplhgpelidhyealikaaaks	MMKSWMKCGLAGAVVLMASFWGGSVRAAGISLKQVSGPVYVVEDNYYVKENSMIYFGAKGVTVVGATWTPDTARELHKLIKRVSSKPVLEVINTNYHTDRAGGNAYWKSIGAKVVATRQTRDLMKSDWAEIVAFTRKGLPEYPDLPLVLPNVVHDGDFTLQEGKVRAFYAGPAHTPDGIFVYFPDEQVLYGNCILKEKLGNLSFANVKAYPQTIERLKAMKLPIKTVIGGHDSPLHGPELIDHYEELIKAAPQS	1	254	99.6063	0	0	0	254	Cluster_4	ChpA_family_subclass_B2_metallo-beta-lactamase_ImiS_NG_050415.1_cds_WP_063865298.1_1	Cluster_4	SP_Sec_SPI_	27-28	SP_Sec_SPI_	27-28	N_Y_H_T_D	C	H	.	.
B2_1014	GCF_000820385.1	114517	654	Aeromonas_veronii_bv_sobria	Bacteria-Pseudomonadota-Gammaproteobacteria-Aeromonadales-Aeromonadaceae-Aeromonas-	4735607	NZ_CDBQ01000030.1	class_B2	548	-	12658	13417	12656	13420	ATGATGAAAGGTTGGATGAAGTGCGGGTTGGCCGGGGCCGTGGTGCTGATGGCGAGTTTCTGGGGCGGCAGCGTGCGGGCGGCGGGGATCGAACTCAAACAGGTGAGCGGCCCTGTTTACGTGGTTGAAGATAACTACTACGTCAAAGAGAACTCCATGGTCTATTTCGGGGCCAAGGGAGTGACGGTGGTGGGGGCGACTTGGACGCCGGATACTGCTCGCGAGCTGCACAAGCTGATTAAACGGGTCAGCAGCAAGCCGGTGCTGGAGGTGATCAACACCAACTACCACACCGATCGGGCGGGCGGTAACGCCTACTGGAAGTCCATCGGGGCCAAAGTGGTGGCGACGCGCCAGACCAGGGATCTGATGAAGAGCGACTGGGCCGAGATTGTCGCC…	WP_080768636.1	CphA_family_subclass_B2_metallo-beta-lactamase	MMKGWMKCGLAGAVVLMASFWGGSVRAAGIELKQVSGPVYVVEDNYYVKENSMVYFGAKGVTVVGATWTPDTARELHKLIKRVSSKPVLEVINTNYHTDRAGGNAYWKSIGAKVVATRQTRDLMKSDWAEIVAFTRKGLPEYPDLPLVLPNVVHDGDFTLQEGKLRAFYAGPAHTPDGIFVYFPDEQVLYGNCILKEKLGNLSFANVKAYPQTIERLKAMKLPIKTVIGGHDSPLHGPELIDHYEALIKAAPQS	ORF_OK	TRUE_HIT	mmkgwikcglagavvllasfwggsvraagislkqvsgpvyvvednyyvkensmvyfgakgvtvvgatwtpdtarelhklikrvsskpvlevintnyhtdraggnaywksigakvvatrqtrdlmksdwaeivaftrkglpeypdlplvlpnvvhdgdftlqegkvralyagpahtpdgifvyfpdeqvlygncilkeklgnlsfadvkaypktlerlkalklpiktvigghdsplhgpelidhyealikaaaks	MMKGWMKCGLAGAVVLMASFWGGSVRAAGIELKQVSGPVYVVEDNYYVKENSMVYFGAKGVTVVGATWTPDTARELHKLIKRVSSKPVLEVINTNYHTDRAGGNAYWKSIGAKVVATRQTRDLMKSDWAEIVAFTRKGLPEYPDLPLVLPNVVHDGDFTLQEGKLRAFYAGPAHTPDGIFVYFPDEQVLYGNCILKEKLGNLSFANVKAYPQTIERLKAMKLPIKTVIGGHDSPLHGPELIDHYEALIKAAPQS	1	254	99.6063	0	0	0	254	Cluster_4	ChpA_family_subclass_B2_metallo-beta-lactamase_ImiS_NG_050415.1_cds_WP_063865298.1_1	Cluster_4	SP_Sec_SPI_	27-28	SP_Sec_SPI_	27-28	N_Y_H_T_D	C	H	.	.
B2_1015	GCF_000836735.1	1588629	1588629	Aeromonas_sp_L_1B5_3	Bacteria-Pseudomonadota-Gammaproteobacteria-Aeromonadales-Aeromonadaceae-Aeromonas-unclassified_Aeromonas-	4840667	NZ_JXIR01000012.1	class_B2	544.1	+	126567	127326	126568	127329	ATGAAAGGTTGGATAAAGTGCGGATTGGCCGGGGCCGTGGTGCTGATGGCGAGTTTCTGGGGCGGCAGCGTGCGGGCGGCGGGGATCTCCCTCAAGCAGGTGAGCGGCCCTGTCTATGTGGTGGAGGATAACTACTACGTCAAAGAGAACTCCATGGTCTATTTCGGGGCCAAGGGGGTGACGGTGGTGGGGGCGACCTGGACGCCGGATATCGCCCGCGAGCTGCACAAGCTCATTAAACGGGTCAGCAGCAAGCCGGTGCTGGAGGTGATCAACACCAACTACCACACCGATCGGGCGGGCGGTAACGCCTACTGGAAGTCCATCGGGGCCAAGGTGGTGGCGACGCGCCAGACCCGGGATCTGATGAAGAGCGACTGGGCCGAGATTGTCGCCTTT…	WP_043849963.1	CphA_family_subclass_B2_metallo-beta-lactamase	MKGWIKCGLAGAVVLMASFWGGSVRAAGISLKQVSGPVYVVEDNYYVKENSMVYFGAKGVTVVGATWTPDIARELHKLIKRVSSKPVLEVINTNYHTDRAGGNAYWKSIGAKVVATRQTRDLMKSDWAEIVAFTRKGLPEYPDLPLVLPNVVHDGDFKLQEGKVRAFYAGPAHTPDGIFVYFPDEQVLYGNCILKEKLGNLSFANVKEYPQTIERLKAMKLPIKTVIGGHDSPLHGPELIDHYEALIKAAPQS	ORF_OK	TRUE_HIT	mmkgwikcglagavvllasfwggsvraagislkqvsgpvyvvednyyvkensmvyfgakgvtvvgatwtpdtarelhklikrvsskpvlevintnyhtdraggnaywksigakvvatrqtrdlmksdwaeivaftrkglpeypdlplvlpnvvhdgdftlqegkvralyagpahtpdgifvyfpdeqvlygncilkeklgnlsfadvkaypktlerlkalklpiktvigghdsplhgpelidhyealikaaaks	MMKGWIKCGLAGAVVLMASFWGGSVRAAGISLKQVSGPVYVVEDNYYVKENSMVYFGAKGVTVVGATWTPDIARELHKLIKRVSSKPVLEVINTNYHTDRAGGNAYWKSIGAKVVATRQTRDLMKSDWAEIVAFTRKGLPEYPDLPLVLPNVVHDGDFKLQEGKVRAFYAGPAHTPDGIFVYFPDEQVLYGNCILKEKLGNLSFANVKEYPQTIERLKAMKLPIKTVIGGHDSPLHGPELIDHYEALIKAAPQS	1	254	99.6063	0	0	0	253	Cluster_4	ChpA_family_subclass_B2_metallo-beta-lactamase_ImiS_NG_050415.1_cds_WP_063865298.1_1	Cluster_4	SP_Sec_SPI_	26-27	SP_Sec_SPI_	26-27	N_Y_H_T_D	C	H	.	.
B2_1016	GCF_000931985.2	29491	645	Aeromonas_salmonicida_subsp_salmonicida	Bacteria-Pseudomonadota-Gammaproteobacteria-Aeromonadales-Aeromonadaceae-Aeromonas-	4806166	NZ_JXTA01000023.1	class_B2	541.4	+	58048	58804	58049	58810	ATGAAAGGTTGGATAAAGTGCGGGCTGGCCGGAGCTGTGGTGCTGGTGGCGAGTTTCTGGGGCGGCAGCGTGCATGCGGCGGCGATCTCCCTCACTCAGGTAAGCGGCCCTGTCTATGTGGTGGAGGATAACTACTACGTCAAAGAGAACTCCATGGTTTATTTCGGAGCCAAGGGAGTGACGATAGTGGGGGCGACCTGGACGCCGGATACCGCCCGCGAGCTGCACAAGCTGATCAAACGGGTCAGCAACAAGCCTGTGCTGGAGGTGATCAACACCAACTACCACACGGACAGGGCAGGGGGTAACGCCTACTGGAAGTCCATCGGTGCCAAGGTGGTCTCGACCCGCCAGACCCGGGATCTGATGAAGAGCGACTGGGCCGAGATCGTCGCCTTT…	WP_005320513.1	CphA_family_subclass_B2_metallo-beta-lactamase	MKGWIKCGLAGAVVLVASFWGGSVHAAAISLTQVSGPVYVVEDNYYVKENSMVYFGAKGVTIVGATWTPDTARELHKLIKRVSNKPVLEVINTNYHTDRAGGNAYWKSIGAKVVSTRQTRDLMKSDWAEIVAFTRKGLPEYPDLPLVLPNVVHDGDFNLQEGKVRAFYAGPAHTPDGIFVYFPDQQVLYGNCILKEKLGNLSFADVKAYPQTLERLKAMKLPIKIVVGGHDSPLHGPELIDHYQALIKAAPQA	ORF_OK	TRUE_HIT	mmkgwikcglagavvllasfwggsvraagislkqvsgpvyvvednyyvkensmvyfgakgvtvvgatwtpdtarelhklikrvsskpvlevintnyhtdraggnaywksigakvvatrqtrdlmksdwaeivaftrkglpeypdlplvlpnvvhdgdftlqegkvralyagpahtpdgifvyfpdeqvlygncilkeklgnlsfadvkaypktlerlkalklpiktvigghdsplhgpelidhyealikaaak	MMKGWIKCGLAGAVVLVASFWGGSVHAAAISLTQVSGPVYVVEDNYYVKENSMVYFGAKGVTIVGATWTPDTARELHKLIKRVSNKPVLEVINTNYHTDRAGGNAYWKSIGAKVVSTRQTRDLMKSDWAEIVAFTRKGLPEYPDLPLVLPNVVHDGDFNLQEGKVRAFYAGPAHTPDGIFVYFPDQQVLYGNCILKEKLGNLSFADVKAYPQTLERLKAMKLPIKIVVGGHDSPLHGPELIDHYQALIKAAPQ	1	253	99.2126	0	0	0	253	Cluster_4	ChpA_family_subclass_B2_metallo-beta-lactamase_ImiS_NG_050415.1_cds_WP_063865298.1_1	Cluster_4	SP_Sec_SPI_	26-27	SP_Sec_SPI_	26-27	N_Y_H_T_D	C	H	.	.
B2_1017	GCF_000940915.1	644	644	Aeromonas_hydrophila	Bacteria-Pseudomonadota-Gammaproteobacteria-Aeromonadales-Aeromonadaceae-Aeromonas-	4901389	NZ_CP010947.1	class_B2	540	+	858396	859155	858394	859158	ATGATGAAAGGTTGGATGAAGTGCGGGTTGGCCGGAGCCGTGGTGCTGATGGCGAGTTTCTGGGGTGGCAGCGTGCGGGCGGCGGGGATGTCGCTGACGCAGGTGAGCGGCCCTGTCTATGTGGTAGAGGACAACTACTACATACAGGAAAACTCCATGGTCTATTTCGGGGCCAAGGGAGTGACGGTGGTGGGGGCGACCTGGACGCCGGATACCGCCCGCGAGCTGCACAAGCTGATCAAACGGGTCAGCCGCCAGCCGGTGCTGGAGGTGATCAACACCAACTACCACACCGACCGGGCTGGCGGTAACGCCTACTGGAAGTCCATCGGTGCCAAGGTGGTATCGACCCGCCAGACCCGGGATCTGATGAAGAGCGACTGGGCCGAGATTGTGGCC…	WP_080891233.1	CphA_family_subclass_B2_metallo-beta-lactamase	MMKGWMKCGLAGAVVLMASFWGGSVRAAGMSLTQVSGPVYVVEDNYYIQENSMVYFGAKGVTVVGATWTPDTARELHKLIKRVSRQPVLEVINTNYHTDRAGGNAYWKSIGAKVVSTRQTRDLMKSDWAEIVAFTRKGLPEYPDLPLVLPNVVHDGDFTLQEGKVRAFYAGPAHTPDGIFVYFPDEQVLYGNCILKEKLGNLSFADVKAYPQTLERLKAMKLPIKTVVGGHDSPLHGPELIDHYEALIKAAPQS	ORF_OK	TRUE_HIT	mmkgwikcglagavvllasfwggsvraagislkqvsgpvyvvednyyvkensmvyfgakgvtvvgatwtpdtarelhklikrvsskpvlevintnyhtdraggnaywksigakvvatrqtrdlmksdwaeivaftrkglpeypdlplvlpnvvhdgdftlqegkvralyagpahtpdgifvyfpdeqvlygncilkeklgnlsfadvkaypktlerlkalklpiktvigghdsplhgpelidhyealikaaaks	MMKGWMKCGLAGAVVLMASFWGGSVRAAGMSLTQVSGPVYVVEDNYYIQENSMVYFGAKGVTVVGATWTPDTARELHKLIKRVSRQPVLEVINTNYHTDRAGGNAYWKSIGAKVVSTRQTRDLMKSDWAEIVAFTRKGLPEYPDLPLVLPNVVHDGDFTLQEGKVRAFYAGPAHTPDGIFVYFPDEQVLYGNCILKEKLGNLSFADVKAYPQTLERLKAMKLPIKTVVGGHDSPLHGPELIDHYEALIKAAPQS	1	254	99.6063	0	0	0	254	Cluster_4	ChpA_family_subclass_B2_metallo-beta-lactamase_ImiS_NG_050415.1_cds_WP_063865298.1_1	Cluster_4	SP_Sec_SPI_	27-28	SP_Sec_SPI_	27-28	N_Y_H_T_D	C	H	.	.
B2_1018	GCF_934254945.1	263763	263763	uncultured_Aeromonas_sp.	Bacteria-Pseudomonadota-Gammaproteobacteria-Aeromonadales-Aeromonadaceae-Aeromonas-environmental_samples-	4423022	NZ_CAKQMO010000016.1	class_B2	546.7	-	5830	6589	5828	6592	ATGATGAAAGGTTGGATGAAGTGCACATTGGCCGGGGCCGTGGTGCTGATGGCGAGTTTCTGGGGTGGCAGCGTGCGGGCGGCGGGGATCTCCCTCAAGCAGGTGAGCGGCCCTGTCTATGTGGTGGAGGATAACTACTACGTCAAAGAGAACTCCATGGTCTATTTCGGGGCCAAGGGGGTGACGGTGGTGGGGGCGACCTGGACGCCGGATACCGCCCGCGAGCTGCACAAGCTCATTAAACGGGTCAGCAGCAAGCCGGTGCTGGAGGTGATCAACACCAACTACCACACCGACCGGGCGGGTGGTAACGCCTACTGGAAGTCCATCGGGGCCAAGGTGGTGGCGACGCGCCAGACCCGGGATCTGATGAAGAGCGACTGGGCCGAGATTGTCGCC…	WP_288728231.1	CphA_family_subclass_B2_metallo-beta-lactamase	MMKGWMKCTLAGAVVLMASFWGGSVRAAGISLKQVSGPVYVVEDNYYVKENSMVYFGAKGVTVVGATWTPDTARELHKLIKRVSSKPVLEVINTNYHTDRAGGNAYWKSIGAKVVATRQTRDLMKSDWAEIVAFTRKGLPEYPDLPLVLPNVVHDGDFKLQEGKVRAFYAGPAHTPDGIFVYFPDEQVLYGNCILKEKLGNLSFANVKAYPQTIERLKAMKLPIKTVIGGHDSPLHGPELIDHYEALIKAVPQS	ORF_OK	TRUE_HIT	mmkgwikcglagavvllasfwggsvraagislkqvsgpvyvvednyyvkensmvyfgakgvtvvgatwtpdtarelhklikrvsskpvlevintnyhtdraggnaywksigakvvatrqtrdlmksdwaeivaftrkglpeypdlplvlpnvvhdgdftlqegkvralyagpahtpdgifvyfpdeqvlygncilkeklgnlsfadvkaypktlerlkalklpiktvigghdsplhgpelidhyealikaaaks	MMKGWMKCTLAGAVVLMASFWGGSVRAAGISLKQVSGPVYVVEDNYYVKENSMVYFGAKGVTVVGATWTPDTARELHKLIKRVSSKPVLEVINTNYHTDRAGGNAYWKSIGAKVVATRQTRDLMKSDWAEIVAFTRKGLPEYPDLPLVLPNVVHDGDFKLQEGKVRAFYAGPAHTPDGIFVYFPDEQVLYGNCILKEKLGNLSFANVKAYPQTIERLKAMKLPIKTVIGGHDSPLHGPELIDHYEALIKAVPQS	1	254	99.6063	0	0	0	254	Cluster_4	ChpA_family_subclass_B2_metallo-beta-lactamase_ImiS_NG_050415.1_cds_WP_063865298.1_1	Cluster_4	SP_Sec_SPI_	27-28	SP_Sec_SPI_	27-28	N_Y_H_T_D	C	H	.	.
B2_1019	GCF_945952205.1	650	650	Aeromonas_jandaei	Bacteria-Pseudomonadota-Gammaproteobacteria-Aeromonadales-Aeromonadaceae-Aeromonas-	4387871	NZ_CAMFHH010000027.1	class_B2	545.5	-	9423	10182	9421	10182	ATGAAAGGTTGGATGAAGTGCGGATTGGCCGGGGCCGTGGTGCTGATGGCGAGTTTCTGGGGCGGCAGCGTGCGGGCGGCGGGGATCGAGCTCAAGCAGGTGAGCGGCCCTGTCTATGTGGTGGAGGACAACTACTACGTCAAAGAGAACTCCATGGTCTATTTCGGGGCCAAGGGGGTGACGGTGGTGGGGGCGACCTGGACGCCGGATACTGCCCGCGAGCTGCACAAGCTGATCAAACGGGTCAGCAGCAAGCCGGTGCTGGAGGTGATCAACACCAACTACCACACCGATCGGGCGGGCGGTAACGCCTACTGGAAGTCCATCGGGGCCAAGGTGGTGGCGACACGCCAGACCCGGGATCTGATGAAGAGCGACTGGGCCGAGATTGTCGCCTTT…	WP_279011750.1	CphA_family_subclass_B2_metallo-beta-lactamase	MKGWMKCGLAGAVVLMASFWGGSVRAAGIELKQVSGPVYVVEDNYYVKENSMVYFGAKGVTVVGATWTPDTARELHKLIKRVSSKPVLEVINTNYHTDRAGGNAYWKSIGAKVVATRQTRDLMKSDWAEIVAFTRKGLPEYPDLPLVLPNVVHDGDFKLQDGKVRAFYAGPAHTPDGIFVYFPDEQVLYGNCILKEKLGNLSFANVKEYPQTIERLKAMKLPIKTVIGGHDSPLHGPELIDHYEELIKAVPQS	ORF_OK	TRUE_HIT	mmkgwikcglagavvllasfwggsvraagislkqvsgpvyvvednyyvkensmvyfgakgvtvvgatwtpdtarelhklikrvsskpvlevintnyhtdraggnaywksigakvvatrqtrdlmksdwaeivaftrkglpeypdlplvlpnvvhdgdftlqegkvralyagpahtpdgifvyfpdeqvlygncilkeklgnlsfadvkaypktlerlkalklpiktvigghdsplhgpelidhyealikaaaks	MMKGWMKCGLAGAVVLMASFWGGSVRAAGIELKQVSGPVYVVEDNYYVKENSMVYFGAKGVTVVGATWTPDTARELHKLIKRVSSKPVLEVINTNYHTDRAGGNAYWKSIGAKVVATRQTRDLMKSDWAEIVAFTRKGLPEYPDLPLVLPNVVHDGDFKLQDGKVRAFYAGPAHTPDGIFVYFPDEQVLYGNCILKEKLGNLSFANVKEYPQTIERLKAMKLPIKTVIGGHDSPLHGPELIDHYEELIKAVPQS	1	254	99.6063	0	0	0	253	Cluster_4	ChpA_family_subclass_B2_metallo-beta-lactamase_ImiS_NG_050415.1_cds_WP_063865298.1_1	Cluster_4	SP_Sec_SPI_	26-27	SP_Sec_SPI_	26-27	N_Y_H_T_D	C	H	.	.
B2_102	GCF_006246355.1	654	654	Aeromonas_veronii	Bacteria-Pseudomonadota-Gammaproteobacteria-Aeromonadales-Aeromonadaceae-Aeromonas-	4639561	NZ_NKWR01000003.1	class_B2	550.7	-	9422	10178	9417	10181	ATGATGAAAGGTTGGATGAAGTGCACATTGGCCGGGGCCGTGGTGCTGATGGCGAGTTTCTGGGGTGGCAGCGTGCGGGCGGCGGGGATCTCCCTTAAGCAGGTGAGCGGCCCTGTTTACGTGGTTGAAGATAACTACTACGTAAAGGAAAACTCCATGGTCTATTTCGGGGCCAAGGGGGTGACGGTGGTGGGGGCGACCTGGACGCCGGATACCGCCCGCGAGCTGCACAAGCTGATCAAACGGGTCAGCAGCAAGCCGGTGCTGGAGGTGATCAACACCAACTACCACACCGATCGGGCGGGCGGTAACGCCTACTGGAAGTCCATCGGGGCCAAGGTGGTGGCGACGCGCCAGACCCGGGATCTGATGAAGAGCGACTGGGCCGAGATTGTCGCC…	WP_139730582.1	CphA_family_subclass_B2_metallo-beta-lactamase	MMKGWMKCTLAGAVVLMASFWGGSVRAAGISLKQVSGPVYVVEDNYYVKENSMVYFGAKGVTVVGATWTPDTARELHKLIKRVSSKPVLEVINTNYHTDRAGGNAYWKSIGAKVVATRQTRDLMKSDWAEIVAFTRKGLPEYPDLPLVLPNVVHDGDFTLQEGKVRAFYAGPAHTPDGIFVYFPDEQVLYGNCILKEKLGNLSFANVKAYPQTIERLKAMKLPIKTVIGGHDSPLHGPELIDHYEELIKAAPQP	ORF_OK	TRUE_HIT	mmkgwikcglagavvllasfwggsvraagislkqvsgpvyvvednyyvkensmvyfgakgvtvvgatwtpdtarelhklikrvsskpvlevintnyhtdraggnaywksigakvvatrqtrdlmksdwaeivaftrkglpeypdlplvlpnvvhdgdftlqegkvralyagpahtpdgifvyfpdeqvlygncilkeklgnlsfadvkaypktlerlkalklpiktvigghdsplhgpelidhyealikaaak	MMKGWMKCTLAGAVVLMASFWGGSVRAAGISLKQVSGPVYVVEDNYYVKENSMVYFGAKGVTVVGATWTPDTARELHKLIKRVSSKPVLEVINTNYHTDRAGGNAYWKSIGAKVVATRQTRDLMKSDWAEIVAFTRKGLPEYPDLPLVLPNVVHDGDFTLQEGKVRAFYAGPAHTPDGIFVYFPDEQVLYGNCILKEKLGNLSFANVKAYPQTIERLKAMKLPIKTVIGGHDSPLHGPELIDHYEELIKAAPQ	1	253	99.2126	0	0	0	254	Cluster_4	ChpA_family_subclass_B2_metallo-beta-lactamase_ImiS_NG_050415.1_cds_WP_063865298.1_1	Cluster_4	SP_Sec_SPI_	27-28	SP_Sec_SPI_	27-28	N_Y_H_T_D	C	H	.	.
B2_1020	GCF_947072295.1	646	646	Aeromonas_sobria	Bacteria-Pseudomonadota-Gammaproteobacteria-Aeromonadales-Aeromonadaceae-Aeromonas-	4465192	NZ_CAMTHQ010000022.1	class_B2	546.7	+	54401	55160	54399	55163	ATGATGAAAGGTTGGATGAAGTGCGGATTGGCCGGGGCCGTGGTGCTGATGGCGAGCTTCTGGGGTGGCAGCGTGCGGGCGGCGGGGATGTCGCTGACGCAGGTGAGCGGCCCCGTTTATGTTGTTGAAGATAACTACTACGTAAAGGAAAACTCCATGGTCTATTTCGGGGCCAAGGGGGTGACGGTGGTGGGGGCGACCTGGACGCCGGATACCGCCCGCGAGCTGCACAAGCTGATCAAACGGGTCAGCAGCAAGCCGGTGCTGGAGGTGATCAACACCAACTACCACACCGACCGGGCGGGGGGTAACGCCTATTGGAAGTCCATCGGGGCCAAGGTGGTGGCGACGCGCCAGACCCGGGATCTGATGAAGAGCGATTGGGCCGAGATTGTCGCC…	WP_303844002.1	CphA_family_subclass_B2_metallo-beta-lactamase	MMKGWMKCGLAGAVVLMASFWGGSVRAAGMSLTQVSGPVYVVEDNYYVKENSMVYFGAKGVTVVGATWTPDTARELHKLIKRVSSKPVLEVINTNYHTDRAGGNAYWKSIGAKVVATRQTRDLMKSDWAEIVAFTRKGLPEYPELPLVLPNVVHDGDFTLQEGKLRAFYAGPAHTPDGIFVYFPDQQVLYGNCILKEKLGNLSFANVKAYPQTIERLKAMKLPIKTVIGGHDSPLHGPELIDHYEELIKAAPQS	ORF_OK	TRUE_HIT	mmkgwikcglagavvllasfwggsvraagislkqvsgpvyvvednyyvkensmvyfgakgvtvvgatwtpdtarelhklikrvsskpvlevintnyhtdraggnaywksigakvvatrqtrdlmksdwaeivaftrkglpeypdlplvlpnvvhdgdftlqegkvralyagpahtpdgifvyfpdeqvlygncilkeklgnlsfadvkaypktlerlkalklpiktvigghdsplhgpelidhyealikaaaks	MMKGWMKCGLAGAVVLMASFWGGSVRAAGMSLTQVSGPVYVVEDNYYVKENSMVYFGAKGVTVVGATWTPDTARELHKLIKRVSSKPVLEVINTNYHTDRAGGNAYWKSIGAKVVATRQTRDLMKSDWAEIVAFTRKGLPEYPELPLVLPNVVHDGDFTLQEGKLRAFYAGPAHTPDGIFVYFPDQQVLYGNCILKEKLGNLSFANVKAYPQTIERLKAMKLPIKTVIGGHDSPLHGPELIDHYEELIKAAPQS	1	254	99.6063	0	0	0	254	Cluster_4	ChpA_family_subclass_B2_metallo-beta-lactamase_ImiS_NG_050415.1_cds_WP_063865298.1_1	Cluster_4	SP_Sec_SPI_	27-28	SP_Sec_SPI_	27-28	N_Y_H_T_D	C	H	.	.
B2_1021	GCF_963525635.1	600645	600645	Aeromonas_piscicola	Bacteria-Pseudomonadota-Gammaproteobacteria-Aeromonadales-Aeromonadaceae-Aeromonas-	4788370	NZ_CAURMI010000072.1	class_B2	540.9	-	13701	14457	13696	14457	ATGAAAGGTTGGATGAAATGTGGGCTGGCCGGTGCCCTGGTGCTGATGGCGAGTTTCTGGGGCGGCAGCGTGCATGCGGCAGCTATCTCCCTCACTCAGGTGAGCGGCCCTGTCTATGTGGTGGAGGACAACTACTACGTCAAAGAGAACTCCATGGTCTATTTCGGGGCCAAGGGGGTGACGGTAGTGGGGGCGACCTGGACGCCGGATACTGCCCGCGAGCTGCACAAGCTGATCAAACGGGTCAGCAGCAAGCCGGTGCTGGAGGTGATCAACACCAACTACCACACCGACCGGGCGGGCGGTAACGCCTACTGGAAGTCCATCGGCGCCAAGGTGGTGGCGACTCGCCATACCCGGGATCTGATGAAGAGCGACTGGGCCGAGATTGTCGCCTTT…	WP_314927945.1	CphA_family_subclass_B2_metallo-beta-lactamase	MKGWMKCGLAGALVLMASFWGGSVHAAAISLTQVSGPVYVVEDNYYVKENSMVYFGAKGVTVVGATWTPDTARELHKLIKRVSSKPVLEVINTNYHTDRAGGNAYWKSIGAKVVATRHTRDLMKSDWAEIVAFTRKGLPEYPDLPLVLPNVVHDGDFNLQEGKLRAFYLGPAHTPDGIFVYFPDQQVLYGNCILKEKLGNLSFADVKAYPQTLERLKAMKLPIKIVVGGHDSPLHGPELIDHYETLIKAAPQA	ORF_OK	TRUE_HIT	mmkgwikcglagavvllasfwggsvraagislkqvsgpvyvvednyyvkensmvyfgakgvtvvgatwtpdtarelhklikrvsskpvlevintnyhtdraggnaywksigakvvatrqtrdlmksdwaeivaftrkglpeypdlplvlpnvvhdgdftlqegkvralyagpahtpdgifvyfpdeqvlygncilkeklgnlsfadvkaypktlerlkalklpiktvigghdsplhgpelidhyealikaaak	MMKGWMKCGLAGALVLMASFWGGSVHAAAISLTQVSGPVYVVEDNYYVKENSMVYFGAKGVTVVGATWTPDTARELHKLIKRVSSKPVLEVINTNYHTDRAGGNAYWKSIGAKVVATRHTRDLMKSDWAEIVAFTRKGLPEYPDLPLVLPNVVHDGDFNLQEGKLRAFYLGPAHTPDGIFVYFPDQQVLYGNCILKEKLGNLSFADVKAYPQTLERLKAMKLPIKIVVGGHDSPLHGPELIDHYETLIKAAPQ	1	253	99.2126	0	0	0	253	Cluster_4	ChpA_family_subclass_B2_metallo-beta-lactamase_ImiS_NG_050415.1_cds_WP_063865298.1_1	Cluster_4	SP_Sec_SPI_	26-27	SP_Sec_SPI_	26-27	N_Y_H_T_D	C	H	.	.
B2_1023	GCF_963862045.1	1216961	1216961	Aeromonas_sp_159	Bacteria-Pseudomonadota-Gammaproteobacteria-Aeromonadales-Aeromonadaceae-Aeromonas-unclassified_Aeromonas-	3360845	NZ_CAWLMI010000052.1	class_B2	548.4	+	20509	21268	20507	21271	ATGATGAAAGGTTGGATGAAGTGCACATTGGCCGGGGCCGTGGTGCTGATGGCGAGTTTCTGGGGTGGCAGCGTGCGGGCGGCGGGGATCTCCCTCAAGCAGGTGAGTGGCCCTGTCTATGTGGTGGAGGACAACTACTACGTCAAAGAGAACTCCATGGTCTATTTCGGGGCCAAGGGGGTGACGGTAGTGGGGGCGACCTGGACGCCGGATACCGCCCGCGAGCTGCACAAGCTCATTAAACGGGTCAGCAGCAAGCCGGTGCTGGAGGTGATCAACACCAACTACCACACCGATCGGGCGGGTGGTAATGCCTACTGGAAGTCCATCGGGGCCAAGGTGGTGGCGACGCGCCAGACCCGGGATCTGATGAAGAGCGACTGGGCCGAGATTGTCGCC…	WP_083851951.1	CphA_family_subclass_B2_metallo-beta-lactamase	MMKGWMKCTLAGAVVLMASFWGGSVRAAGISLKQVSGPVYVVEDNYYVKENSMVYFGAKGVTVVGATWTPDTARELHKLIKRVSSKPVLEVINTNYHTDRAGGNAYWKSIGAKVVATRQTRDLMKSDWAEIVAFTRKGLPEYPDLPLVLPNVVHDGDFTLQEGKVRAFYAGPAHTPDGIFVYFPDEQVLYGNCILKEKLGNLSFANVKAYPQTIERLKAMKLPIKTVIGGHDSPLHGPELIDHYEELIKAVPQS	ORF_OK	TRUE_HIT	mmkgwikcglagavvllasfwggsvraagislkqvsgpvyvvednyyvkensmvyfgakgvtvvgatwtpdtarelhklikrvsskpvlevintnyhtdraggnaywksigakvvatrqtrdlmksdwaeivaftrkglpeypdlplvlpnvvhdgdftlqegkvralyagpahtpdgifvyfpdeqvlygncilkeklgnlsfadvkaypktlerlkalklpiktvigghdsplhgpelidhyealikaaaks	MMKGWMKCTLAGAVVLMASFWGGSVRAAGISLKQVSGPVYVVEDNYYVKENSMVYFGAKGVTVVGATWTPDTARELHKLIKRVSSKPVLEVINTNYHTDRAGGNAYWKSIGAKVVATRQTRDLMKSDWAEIVAFTRKGLPEYPDLPLVLPNVVHDGDFTLQEGKVRAFYAGPAHTPDGIFVYFPDEQVLYGNCILKEKLGNLSFANVKAYPQTIERLKAMKLPIKTVIGGHDSPLHGPELIDHYEELIKAVPQS	1	254	99.6063	0	0	0	254	Cluster_4	ChpA_family_subclass_B2_metallo-beta-lactamase_ImiS_NG_050415.1_cds_WP_063865298.1_1	Cluster_4	SP_Sec_SPI_	27-28	SP_Sec_SPI_	27-28	N_Y_H_T_D	C	H	.	.
B2_1024	GCF_963863565.1	196024	196024	Aeromonas_dhakensis	Bacteria-Pseudomonadota-Gammaproteobacteria-Aeromonadales-Aeromonadaceae-Aeromonas-	4786349	NZ_CAWLSE010000032.1	class_B2	541.2	-	7341	8100	7339	8100	ATGAAAGGTTGGATAAAGTGCGGGCTGGCCGGGGCCCTGGTGCTGATGGCGAGTTTCTGGGGTGGCAGCGTGCGGGCGGCAGGGATGTCGCTGACGCAGGTGAGCGGCCCTGTCTATATGGTGGAGGACAACTACTACGTCAAAGAGAACTCCATGGTCTATTTCGGGGCCAAGGGGGTGACTGTGGTGGGGGCGACCTGGACGCCGGATACCGCCCGCGAGCTGCACAAGCTGATCAAACGGGTCAGCCGCCAGCCGGTGCTGGAGGTGATCAACACCAACTACCACACCGACCGGGCAGGCGGTAACGCCTACTGGAAGTCCATCGGGGCCAAGGTGGTGGCGACGCGCCAGACCCGGGATCTGATGAAGAGCGACTGGGCCGAGATTGTCGCCTTT…	WP_017780219.1	CphA_family_subclass_B2_metallo-beta-lactamase	MKGWIKCGLAGALVLMASFWGGSVRAAGMSLTQVSGPVYMVEDNYYVKENSMVYFGAKGVTVVGATWTPDTARELHKLIKRVSRQPVLEVINTNYHTDRAGGNAYWKSIGAKVVATRQTRDLMKSDWAEIVAFTRKGLPEYPDLPLVLPNVVHEGDFTLQEGKLRAFYAGPAHTPDGIFVYFPDEQVLYGNCILKEKLGNLSFADVKAYPQTLERLKAMKLPIKTVVGGHDSPLHGPELIDHYEALIKAAPQS	ORF_OK	TRUE_HIT	mmkgwikcglagavvllasfwggsvraagislkqvsgpvyvvednyyvkensmvyfgakgvtvvgatwtpdtarelhklikrvsskpvlevintnyhtdraggnaywksigakvvatrqtrdlmksdwaeivaftrkglpeypdlplvlpnvvhdgdftlqegkvralyagpahtpdgifvyfpdeqvlygncilkeklgnlsfadvkaypktlerlkalklpiktvigghdsplhgpelidhyealikaaaks	MMKGWIKCGLAGALVLMASFWGGSVRAAGMSLTQVSGPVYMVEDNYYVKENSMVYFGAKGVTVVGATWTPDTARELHKLIKRVSRQPVLEVINTNYHTDRAGGNAYWKSIGAKVVATRQTRDLMKSDWAEIVAFTRKGLPEYPDLPLVLPNVVHEGDFTLQEGKLRAFYAGPAHTPDGIFVYFPDEQVLYGNCILKEKLGNLSFADVKAYPQTLERLKAMKLPIKTVVGGHDSPLHGPELIDHYEALIKAAPQS	1	254	99.6063	0	0	0	253	Cluster_4	ChpA_family_subclass_B2_metallo-beta-lactamase_ImiS_NG_050415.1_cds_WP_063865298.1_1	Cluster_4	SP_Sec_SPI_	26-27	SP_Sec_SPI_	26-27	N_Y_H_T_D	C	H	.	.
B2_1025	GCF_963864655.1	105751	105751	Aeromonas_bestiarum	Bacteria-Pseudomonadota-Gammaproteobacteria-Aeromonadales-Aeromonadaceae-Aeromonas-	4788109	NZ_CAWLWI010000009.1	class_B2	533.2	+	59892	60648	59893	60654	ATGAAAGGTTGGATAAAGTGCGGGCTGGCCGGGGCCCTGGTGTTGATGGCGAGTTTCTGGGGCGGCAGCGTGCATGCGGCGGCTATCTCCCTCACTCAGGTGAGCGGCCCCGTCTATGTGGTGGAGGACAACTACTACGTCAAAGAGAACTCCATGGTCTATTTCGGGGCCAAGGGGGTGACGGTAGTGGGGGCGACCTGGACGCCGGATACCGCCCGCGAGCTGCACAAGCTGATCAAGCGGGTCAGCAGCAAGCCCGTGCTGGAGGTGATCAACACCAACTATCACACCGACAGGGCGGGGGGTAACGCCTACTGGAAGTCCATCGGCGCCAGGGTGGTATCGACCCGCCAGACCCGGGATCTGATGAAGAGCGACTGGGCCGAAATTGTCGCCTTT…	WP_043135519.1	CphA_family_subclass_B2_metallo-beta-lactamase	MKGWIKCGLAGALVLMASFWGGSVHAAAISLTQVSGPVYVVEDNYYVKENSMVYFGAKGVTVVGATWTPDTARELHKLIKRVSSKPVLEVINTNYHTDRAGGNAYWKSIGARVVSTRQTRDLMKSDWAEIVAFTRKGLPEYPDLPLVLPNEVHDGDFTLQEGKVRAFYAGPAHTPDGIFVYFPEEQVLYGNCILKEKLGNLSFADVKAYPQTLARLKAMKLPIKIVVGGHDSPLHGPELIDHYETLIKAAPQV	ORF_OK	TRUE_HIT	mmkgwikcglagavvllasfwggsvraagislkqvsgpvyvvednyyvkensmvyfgakgvtvvgatwtpdtarelhklikrvsskpvlevintnyhtdraggnaywksigakvvatrqtrdlmksdwaeivaftrkglpeypdlplvlpnvvhdgdftlqegkvralyagpahtpdgifvyfpdeqvlygncilkeklgnlsfadvkaypktlerlkalklpiktvigghdsplhgpelidhyealikaaak	MMKGWIKCGLAGALVLMASFWGGSVHAAAISLTQVSGPVYVVEDNYYVKENSMVYFGAKGVTVVGATWTPDTARELHKLIKRVSSKPVLEVINTNYHTDRAGGNAYWKSIGARVVSTRQTRDLMKSDWAEIVAFTRKGLPEYPDLPLVLPNEVHDGDFTLQEGKVRAFYAGPAHTPDGIFVYFPEEQVLYGNCILKEKLGNLSFADVKAYPQTLARLKAMKLPIKIVVGGHDSPLHGPELIDHYETLIKAAPQ	1	253	99.2126	0	0	0	253	Cluster_4	ChpA_family_subclass_B2_metallo-beta-lactamase_ImiS_NG_050415.1_cds_WP_063865298.1_1	Cluster_4	SP_Sec_SPI_	26-27	SP_Sec_SPI_	26-27	N_Y_H_T_D	C	H	.	.
B2_1026	GCF_963864675.1	1324960	645	Aeromonas_salmonicida_subsp_pectinolytica_34mel	Bacteria-Pseudomonadota-Gammaproteobacteria-Aeromonadales-Aeromonadaceae-Aeromonas-	4767351	NZ_CAWLXD010000102.1	class_B2	533.7	+	105	858	103	864	ATGAAAGGTTGGATAAAGTGCGGGCTGGCCGGAGCTGTGGTGCTGGTGGCGAGTTTCTGGGGCGGCAGCGTGCATGCGGCGGCGATCTCCCTCACTCAGGTGAGCGGCCCCGTGTATGTCGTAGAGGACAACTACTACGTCAAAGAGAACTCCATGGTCTATTTCGGGGCCAAGGGGGTGACGGTAGTGGGGGCGACCTGGACGCCGGATACCGCCCGTGAGCTGCACAAGCTGATCAAACGGGTCAGCAACAAGCCTGTGCTGGAGGTGATCAACACCAACTACCACACGGACAGGGCAGGGGGTAACTCCTACTGGAAGTCCATCGGTGCCAAGGTGGTATCGACCCGCCAGACCCGGGAGCTGATGAAGAGCGATTGGGCCGAGATCGTCGCCTTT…	WP_021141010.1	CphA_family_subclass_B2_metallo-beta-lactamase	MKGWIKCGLAGAVVLVASFWGGSVHAAAISLTQVSGPVYVVEDNYYVKENSMVYFGAKGVTVVGATWTPDTARELHKLIKRVSNKPVLEVINTNYHTDRAGGNSYWKSIGAKVVSTRQTRELMKSDWAEIVAFTRKGLPEYPDLPLVLPNVVYDGDFSLQEDKVRAFYAGPAHTPDGIFVYFPDEQVLYGNCILKEKLGNLSFADVKAYPQTLERLKAMKLPIKIVVGGHDSPLHGPELIDHYETLIKAAPQA	ORF_OK	TRUE_HIT	mkgwikcglagavvllasfwggsvraagislkqvsgpvyvvednyyvkensmvyfgakgvtvvgatwtpdtarelhklikrvsskpvlevintnyhtdraggnaywksigakvvatrqtrdlmksdwaeivaftrkglpeypdlplvlpnvvhdgdftlqegkvralyagpahtpdgifvyfpdeqvlygncilkeklgnlsfadvkaypktlerlkalklpiktvigghdsplhgpelidhyealikaaak	MKGWIKCGLAGAVVLVASFWGGSVHAAAISLTQVSGPVYVVEDNYYVKENSMVYFGAKGVTVVGATWTPDTARELHKLIKRVSNKPVLEVINTNYHTDRAGGNSYWKSIGAKVVSTRQTRELMKSDWAEIVAFTRKGLPEYPDLPLVLPNVVYDGDFSLQEDKVRAFYAGPAHTPDGIFVYFPDEQVLYGNCILKEKLGNLSFADVKAYPQTLERLKAMKLPIKIVVGGHDSPLHGPELIDHYETLIKAAPQ	2	253	98.8189	0	0	0	253	Cluster_4	ChpA_family_subclass_B2_metallo-beta-lactamase_ImiS_NG_050415.1_cds_WP_063865298.1_1	Cluster_4	SP_Sec_SPI_	26-27	SP_Sec_SPI_	26-27	N_Y_H_T_D	C	H	.	.
B2_1027	GCF_963865165.1	1458276	650	Aeromonas_jandaei_Riv2	Bacteria-Pseudomonadota-Gammaproteobacteria-Aeromonadales-Aeromonadaceae-Aeromonas-	4478089	NZ_CAWLYH010000015.1	class_B2	547.7	-	10853	11612	10851	11615	ATGATGAAAGGTTGGATGAAGTGCGGGTTGGCCGGGGCCGTGGTGCTGATGGCGAGTTTTTGGGGCGGCAGCGTGCGGGCGGCGGGGATCTCCCTCAAGCAGGTGAGCGGCCCGGTCTATGTGGTGGAGGATAACTACTACGTCAAAGAGAACTCCATGGTCTATTTCGGGGCCAAGGGGGTGACGGTGGTGGGGGCGACCTGGACGCCGGATACCGCTCGCGAGCTGCATAAGCTCATTAAACGGGTCAGCAGCAAGCCGGTGCTGGAGGTGATCAACACCAACTACCACACCGATCGGGCGGGCGGTAACGCCTACTGGAAGTCCATCGGGGCCAAGGTGGTGGCGACGCGCCAGACCAGGGATCTGATGAAGAGCGACTGGGCCGAGATTGTCGCC…	WP_081849377.1	CphA_family_subclass_B2_metallo-beta-lactamase	MMKGWMKCGLAGAVVLMASFWGGSVRAAGISLKQVSGPVYVVEDNYYVKENSMVYFGAKGVTVVGATWTPDTARELHKLIKRVSSKPVLEVINTNYHTDRAGGNAYWKSIGAKVVATRQTRDLMKSDWAEIVAFTRKGLPEYPDLPLVLPNVVHDGDFTLQEGKVRAFYAGPAHTPDGIFVYFPDEQVLYGNCILKEKLGNLSFANVKEYPQTIERLKAMKLPIKTVIGGHDSPLHGPELIDHYEELIKAAPQS	ORF_OK	TRUE_HIT	mmkgwikcglagavvllasfwggsvraagislkqvsgpvyvvednyyvkensmvyfgakgvtvvgatwtpdtarelhklikrvsskpvlevintnyhtdraggnaywksigakvvatrqtrdlmksdwaeivaftrkglpeypdlplvlpnvvhdgdftlqegkvralyagpahtpdgifvyfpdeqvlygncilkeklgnlsfadvkaypktlerlkalklpiktvigghdsplhgpelidhyealikaaaks	MMKGWMKCGLAGAVVLMASFWGGSVRAAGISLKQVSGPVYVVEDNYYVKENSMVYFGAKGVTVVGATWTPDTARELHKLIKRVSSKPVLEVINTNYHTDRAGGNAYWKSIGAKVVATRQTRDLMKSDWAEIVAFTRKGLPEYPDLPLVLPNVVHDGDFTLQEGKVRAFYAGPAHTPDGIFVYFPDEQVLYGNCILKEKLGNLSFANVKEYPQTIERLKAMKLPIKTVIGGHDSPLHGPELIDHYEELIKAAPQS	1	254	99.6063	0	0	0	254	Cluster_4	ChpA_family_subclass_B2_metallo-beta-lactamase_ImiS_NG_050415.1_cds_WP_063865298.1_1	Cluster_4	SP_Sec_SPI_	27-28	SP_Sec_SPI_	27-28	N_Y_H_T_D	C	H	.	.
B2_1028	GCF_963865435.1	1347420	654	Aeromonas_veronii_Hm21	Bacteria-Pseudomonadota-Gammaproteobacteria-Aeromonadales-Aeromonadaceae-Aeromonas-	4766880	NZ_CAWLYR010000001.1	class_B2	538.7	-	3834312	3835071	3834310	3835074	ATGATGAAAGGTTGGATGAAGTGCACATTGGCCGGGGCCATGGTGCTGATGGCGAGTTTCTGGGGTGGCAGCGTGCGGGCTGCGGGGATCGAACTCAAACAGGTGAGCGGCCCTGTCTATGTTGTTGAAGATAACTACTACGTCAAAGAGAACTCCATGGTCTATTTCGGGGCCAAGGGGGTGACGGTGGTGGGGGCGACCTGGACGCCGGATACCGCCCGCGAGCTGCACAAGCTGATAAAAAGAGTCAGCAGCAAGCCGGTGCTGGAGGTGATCAACACCAACTACCACACCGACCGGGCGGGCGGTAACGCCTACTGGAAGTCCATCGGGGCCAAGGTGGTGGCGACCCGTCAGACCCGGGATCTGATGAAGAGCGACTGGGCCGAGATTGTCGCC…	WP_080660162.1	CphA_family_subclass_B2_metallo-beta-lactamase	MMKGWMKCTLAGAMVLMASFWGGSVRAAGIELKQVSGPVYVVEDNYYVKENSMVYFGAKGVTVVGATWTPDTARELHKLIKRVSSKPVLEVINTNYHTDRAGGNAYWKSIGAKVVATRQTRDLMKSDWAEIVAFTRKGLPEYPDLPLVLPNVVHDGDFTLQEGKVRAFYAGPAHTPDGIFVYFPDEQVLYGNCILKEKLGNLSFANVKAYPQTIERLKAMKLPIKTVIGGHDSPLHGPELIDHYEALIKAVPQS	ORF_OK	TRUE_HIT	mmkgwikcglagavvllasfwggsvraagislkqvsgpvyvvednyyvkensmvyfgakgvtvvgatwtpdtarelhklikrvsskpvlevintnyhtdraggnaywksigakvvatrqtrdlmksdwaeivaftrkglpeypdlplvlpnvvhdgdftlqegkvralyagpahtpdgifvyfpdeqvlygncilkeklgnlsfadvkaypktlerlkalklpiktvigghdsplhgpelidhyealikaaaks	MMKGWMKCTLAGAMVLMASFWGGSVRAAGIELKQVSGPVYVVEDNYYVKENSMVYFGAKGVTVVGATWTPDTARELHKLIKRVSSKPVLEVINTNYHTDRAGGNAYWKSIGAKVVATRQTRDLMKSDWAEIVAFTRKGLPEYPDLPLVLPNVVHDGDFTLQEGKVRAFYAGPAHTPDGIFVYFPDEQVLYGNCILKEKLGNLSFANVKAYPQTIERLKAMKLPIKTVIGGHDSPLHGPELIDHYEALIKAVPQS	1	254	99.6063	0	0	0	254	Cluster_4	ChpA_family_subclass_B2_metallo-beta-lactamase_ImiS_NG_050415.1_cds_WP_063865298.1_1	Cluster_4	SP_Sec_SPI_	27-28	SP_Sec_SPI_	27-28	N_Y_H_T_D	C	H	.	.
B2_1029	GCF_963866355.1	105751	105751	Aeromonas_bestiarum	Bacteria-Pseudomonadota-Gammaproteobacteria-Aeromonadales-Aeromonadaceae-Aeromonas-	4690820	NZ_CAWMCU010000037.1	class_B2	528.9	+	215738	216494	215739	216500	ATGAAAGGTTGGATAAAGTGCGGGCTGGCCGGGGCCCTGGTGCTGGTGGCGAGCTTCTGGGGTGGCAGCGTGCATGCGGCGGCGATCTCCCTCACTCAGGTGAGCGGCCCCGTGTATGTGGTTGAAGATAACTACTATGTACAGGAAAACTCCATGGTCTATTTCGGGGCCAAGGGGGTGACGGTAGTGGGGGCGACCTGGACGCCGGATACCGCCCGCGAGCTGCACAAGCTGATCAAGCGGGTCAGCAGCAAGCCCGTGCTGGAGGTGATCAACACCAACTATCACACCGACAGGGCGGGGGGTAACGCCTACTGGAAGTCCATCGGCGCCAGGGTGGTATCGACGCGCCAGACCCGGGATCTGATGAAGAGCGACTGGGCCGAAATTGTCGCCTTT…	WP_043557559.1	CphA_family_subclass_B2_metallo-beta-lactamase	MKGWIKCGLAGALVLVASFWGGSVHAAAISLTQVSGPVYVVEDNYYVQENSMVYFGAKGVTVVGATWTPDTARELHKLIKRVSSKPVLEVINTNYHTDRAGGNAYWKSIGARVVSTRQTRDLMKSDWAEIVAFTRKGLPEYPDLPLVLPNEVHDGDFTLQEGKLRAFYAGPAHTPDGIFVYFPEEQVLYGNCILKEKLGNLSFADVKAYPQTLARLKAMKLPIKIVVGGHDSPLHGPELIDHYETLIKAAPQV	ORF_OK	TRUE_HIT	mmkgwikcglagavvllasfwggsvraagislkqvsgpvyvvednyyvkensmvyfgakgvtvvgatwtpdtarelhklikrvsskpvlevintnyhtdraggnaywksigakvvatrqtrdlmksdwaeivaftrkglpeypdlplvlpnvvhdgdftlqegkvralyagpahtpdgifvyfpdeqvlygncilkeklgnlsfadvkaypktlerlkalklpiktvigghdsplhgpelidhyealikaaak	MMKGWIKCGLAGALVLVASFWGGSVHAAAISLTQVSGPVYVVEDNYYVQENSMVYFGAKGVTVVGATWTPDTARELHKLIKRVSSKPVLEVINTNYHTDRAGGNAYWKSIGARVVSTRQTRDLMKSDWAEIVAFTRKGLPEYPDLPLVLPNEVHDGDFTLQEGKLRAFYAGPAHTPDGIFVYFPEEQVLYGNCILKEKLGNLSFADVKAYPQTLARLKAMKLPIKIVVGGHDSPLHGPELIDHYETLIKAAPQ	1	253	99.2126	0	0	0	253	Cluster_4	ChpA_family_subclass_B2_metallo-beta-lactamase_ImiS_NG_050415.1_cds_WP_063865298.1_1	Cluster_4	SP_Sec_SPI_	26-27	SP_Sec_SPI_	26-27	N_Y_H_T_D	C	H	.	.
B2_103	GCF_006246385.1	644	644	Aeromonas_hydrophila	Bacteria-Pseudomonadota-Gammaproteobacteria-Aeromonadales-Aeromonadaceae-Aeromonas-	4966425	NZ_NKWV01000005.1	class_B2	539.2	-	13615	14374	13613	14374	ATGAAAGGTTGGATAAAGTGCGGATTGGCCGGCGCCGTGGTGCTGATGGCGAGTTTCTGGGGGGGCAGCGTGCGGGCGGCGGGGATGTCGCTGACGCAGGTGAGCGGCCCGGTTTATGTGGTAGAGGACAATTACTACGTGCAGGAAAACTCCATGGTCTATTTCGGGGCCGAGGGAGTGACTGTGGTAGGGGCGACCTGGACGCCGGATACCGCCCGCGAGCTGCACAAGCTGATCAAACGGGTCAGCAGCAAGCCGGTGCTGGAGGTGATCAACACCAACTACCACACCGACCGGGCGGGCGGTAATGCCTACTGGAAGTCCATCGGGGCCAAGGTGGTATCGACCCGCCAGACCCGGGACCTGATGAAGAGTGACTGGGCCGAGATCGTCGCCTTT…	WP_043125254.1	CphA_family_subclass_B2_metallo-beta-lactamase	MKGWIKCGLAGAVVLMASFWGGSVRAAGMSLTQVSGPVYVVEDNYYVQENSMVYFGAEGVTVVGATWTPDTARELHKLIKRVSSKPVLEVINTNYHTDRAGGNAYWKSIGAKVVSTRQTRDLMKSDWAEIVAFTRKGLPDYPDLPLVLPNVVHEGDFTLQGGKLRAFYAGPAHTPDGIFVYFPDQQVLYGNCILKEKLGNLSFADVKAYPQTLERLRAMKLPIKTVVGGHDSPLHGPELIDHYEALIKAAPQS	ORF_OK	TRUE_HIT	mmkgwikcglagavvllasfwggsvraagislkqvsgpvyvvednyyvkensmvyfgakgvtvvgatwtpdtarelhklikrvsskpvlevintnyhtdraggnaywksigakvvatrqtrdlmksdwaeivaftrkglpeypdlplvlpnvvhdgdftlqegkvralyagpahtpdgifvyfpdeqvlygncilkeklgnlsfadvkaypktlerlkalklpiktvigghdsplhgpelidhyealikaaaks	MMKGWIKCGLAGAVVLMASFWGGSVRAAGMSLTQVSGPVYVVEDNYYVQENSMVYFGAEGVTVVGATWTPDTARELHKLIKRVSSKPVLEVINTNYHTDRAGGNAYWKSIGAKVVSTRQTRDLMKSDWAEIVAFTRKGLPDYPDLPLVLPNVVHEGDFTLQGGKLRAFYAGPAHTPDGIFVYFPDQQVLYGNCILKEKLGNLSFADVKAYPQTLERLRAMKLPIKTVVGGHDSPLHGPELIDHYEALIKAAPQS	1	254	99.6063	0	0	0	253	Cluster_4	ChpA_family_subclass_B2_metallo-beta-lactamase_ImiS_NG_050415.1_cds_WP_063865298.1_1	Cluster_4	SP_Sec_SPI_	26-27	SP_Sec_SPI_	26-27	N_Y_H_T_D	C	H	.	.
B2_1030	GCF_963866445.1	656	656	Aeromonas_allosaccharophila	Bacteria-Pseudomonadota-Gammaproteobacteria-Aeromonadales-Aeromonadaceae-Aeromonas-	4708594	NZ_CAWMDO010000120.1	class_B2	548.3	-	9392	10151	9390	10151	ATGAAAGGTTGGATAAAGTGCGGATTGGCCGGGGCTGTGGTGCTGATGGCGAGTTTCTGGGGCGGCAGCGTGCGGGCGGCGGGGATGTCGCTGACGCAGGTGAGCGGCCCCGTGTATGTTGTTGAAGATAACTACTACGTCAAAGAGAACTCCATGGTCTATTTCGGGGCCAAGGGGGTGACGGTGGTGGGGGCGACCTGGACGCCGGATACCGCCCGCGAGCTGCACAAGCTGATCAAACGGGTCAGCAGCAAGCCGGTGCTGGAGGTGATCAACACCAACTACCACACCGACCGGGCAGGCGGTAACGCCTACTGGAAGTCCATCGGCGCCAAGGTGGTGGCGACGCGCCAGACCCGGGATCTGATGAAGAGCGACTGGGCCGAGATTGTCGCCTTT…	WP_042063527.1	CphA_family_subclass_B2_metallo-beta-lactamase	MKGWIKCGLAGAVVLMASFWGGSVRAAGMSLTQVSGPVYVVEDNYYVKENSMVYFGAKGVTVVGATWTPDTARELHKLIKRVSSKPVLEVINTNYHTDRAGGNAYWKSIGAKVVATRQTRDLMKSDWAEIVAFTRKGLPEYPDLPLVLPNVVHDGDFTLQEGKVRAFFAGPAHTPDGIFVYFPDQQVLYGNCILKETLGNLSFANVKAYPQTIERLKAMKLPIKTVIGGHDSPLHGPELIDHYEALIKAAPQS	ORF_OK	TRUE_HIT	mmkgwikcglagavvllasfwggsvraagislkqvsgpvyvvednyyvkensmvyfgakgvtvvgatwtpdtarelhklikrvsskpvlevintnyhtdraggnaywksigakvvatrqtrdlmksdwaeivaftrkglpeypdlplvlpnvvhdgdftlqegkvralyagpahtpdgifvyfpdeqvlygncilkeklgnlsfadvkaypktlerlkalklpiktvigghdsplhgpelidhyealikaaaks	MMKGWIKCGLAGAVVLMASFWGGSVRAAGMSLTQVSGPVYVVEDNYYVKENSMVYFGAKGVTVVGATWTPDTARELHKLIKRVSSKPVLEVINTNYHTDRAGGNAYWKSIGAKVVATRQTRDLMKSDWAEIVAFTRKGLPEYPDLPLVLPNVVHDGDFTLQEGKVRAFFAGPAHTPDGIFVYFPDQQVLYGNCILKETLGNLSFANVKAYPQTIERLKAMKLPIKTVIGGHDSPLHGPELIDHYEALIKAAPQS	1	254	99.6063	0	0	0	253	Cluster_4	ChpA_family_subclass_B2_metallo-beta-lactamase_ImiS_NG_050415.1_cds_WP_063865298.1_1	Cluster_4	SP_Sec_SPI_	26-27	SP_Sec_SPI_	26-27	N_Y_H_T_D	C	H	.	.
B2_1031	GCF_963866575.1	1588629	1588629	Aeromonas_sp_L_1B5_3	Bacteria-Pseudomonadota-Gammaproteobacteria-Aeromonadales-Aeromonadaceae-Aeromonas-unclassified_Aeromonas-	4840667	NZ_CAWMDN010000024.1	class_B2	544.1	+	126567	127326	126568	127329	ATGAAAGGTTGGATAAAGTGCGGATTGGCCGGGGCCGTGGTGCTGATGGCGAGTTTCTGGGGCGGCAGCGTGCGGGCGGCGGGGATCTCCCTCAAGCAGGTGAGCGGCCCTGTCTATGTGGTGGAGGATAACTACTACGTCAAAGAGAACTCCATGGTCTATTTCGGGGCCAAGGGGGTGACGGTGGTGGGGGCGACCTGGACGCCGGATATCGCCCGCGAGCTGCACAAGCTCATTAAACGGGTCAGCAGCAAGCCGGTGCTGGAGGTGATCAACACCAACTACCACACCGATCGGGCGGGCGGTAACGCCTACTGGAAGTCCATCGGGGCCAAGGTGGTGGCGACGCGCCAGACCCGGGATCTGATGAAGAGCGACTGGGCCGAGATTGTCGCCTTT…	WP_043849963.1	CphA_family_subclass_B2_metallo-beta-lactamase	MKGWIKCGLAGAVVLMASFWGGSVRAAGISLKQVSGPVYVVEDNYYVKENSMVYFGAKGVTVVGATWTPDIARELHKLIKRVSSKPVLEVINTNYHTDRAGGNAYWKSIGAKVVATRQTRDLMKSDWAEIVAFTRKGLPEYPDLPLVLPNVVHDGDFKLQEGKVRAFYAGPAHTPDGIFVYFPDEQVLYGNCILKEKLGNLSFANVKEYPQTIERLKAMKLPIKTVIGGHDSPLHGPELIDHYEALIKAAPQS	ORF_OK	TRUE_HIT	mmkgwikcglagavvllasfwggsvraagislkqvsgpvyvvednyyvkensmvyfgakgvtvvgatwtpdtarelhklikrvsskpvlevintnyhtdraggnaywksigakvvatrqtrdlmksdwaeivaftrkglpeypdlplvlpnvvhdgdftlqegkvralyagpahtpdgifvyfpdeqvlygncilkeklgnlsfadvkaypktlerlkalklpiktvigghdsplhgpelidhyealikaaaks	MMKGWIKCGLAGAVVLMASFWGGSVRAAGISLKQVSGPVYVVEDNYYVKENSMVYFGAKGVTVVGATWTPDIARELHKLIKRVSSKPVLEVINTNYHTDRAGGNAYWKSIGAKVVATRQTRDLMKSDWAEIVAFTRKGLPEYPDLPLVLPNVVHDGDFKLQEGKVRAFYAGPAHTPDGIFVYFPDEQVLYGNCILKEKLGNLSFANVKEYPQTIERLKAMKLPIKTVIGGHDSPLHGPELIDHYEALIKAAPQS	1	254	99.6063	0	0	0	253	Cluster_4	ChpA_family_subclass_B2_metallo-beta-lactamase_ImiS_NG_050415.1_cds_WP_063865298.1_1	Cluster_4	SP_Sec_SPI_	26-27	SP_Sec_SPI_	26-27	N_Y_H_T_D	C	H	.	.
B2_1032	GCF_963866635.1	196024	196024	Aeromonas_dhakensis	Bacteria-Pseudomonadota-Gammaproteobacteria-Aeromonadales-Aeromonadaceae-Aeromonas-	4692336	NZ_CAWMEC010000069.1	class_B2	540.4	+	116653	117412	116654	117415	ATGAAAGGTTGGATAAAGTGCGGGTTGGCCGGGGCCCTGGTGCTGATGGCGAGCTTCTGGGGGGGCAGCGTGCGGGCGGCGGGGATGTCGCTGACGCAGGTGAGCGGCCCTGTCTATGTGGTGGAGGACAACTACTACGTCAAAGAGAACTCCATGGTCTATTTCGGGACCAAGGGGGTGACGGTGGTGGGGGCGACCTGGACGCCGGATACCGCCCGCGAGTTGCACAAGCTGATCAAACGGGTCAGCCGCCAGCCGGTGCTGGAGGTGATCAACACCAACTACCACACCGACCGGGCTGGCGGTAACGCCTACTGGAAGTCCATCGGTGCCAAGGTGGTATCGACCCGCCAGACCCGGGATCTGATGAAGAGCGACTGGGCCGAGATTGTCGCCTTT…	WP_042008783.1	CphA_family_subclass_B2_metallo-beta-lactamase	MKGWIKCGLAGALVLMASFWGGSVRAAGMSLTQVSGPVYVVEDNYYVKENSMVYFGTKGVTVVGATWTPDTARELHKLIKRVSRQPVLEVINTNYHTDRAGGNAYWKSIGAKVVSTRQTRDLMKSDWAEIVAFTRKGLPEYPDLPLVLPNVVHEGDFTLQEGKLRAFYAGPAHTPDGIFVYFPDEQVLYGNCILKEKLGNLSFADVKAYPQTLERLKAMKLPIKTVVGGHDSPLHGPELIDHYEELIKAVPQS	ORF_OK	TRUE_HIT	mmkgwikcglagavvllasfwggsvraagislkqvsgpvyvvednyyvkensmvyfgakgvtvvgatwtpdtarelhklikrvsskpvlevintnyhtdraggnaywksigakvvatrqtrdlmksdwaeivaftrkglpeypdlplvlpnvvhdgdftlqegkvralyagpahtpdgifvyfpdeqvlygncilkeklgnlsfadvkaypktlerlkalklpiktvigghdsplhgpelidhyealikaaaks	MMKGWIKCGLAGALVLMASFWGGSVRAAGMSLTQVSGPVYVVEDNYYVKENSMVYFGTKGVTVVGATWTPDTARELHKLIKRVSRQPVLEVINTNYHTDRAGGNAYWKSIGAKVVSTRQTRDLMKSDWAEIVAFTRKGLPEYPDLPLVLPNVVHEGDFTLQEGKLRAFYAGPAHTPDGIFVYFPDEQVLYGNCILKEKLGNLSFADVKAYPQTLERLKAMKLPIKTVVGGHDSPLHGPELIDHYEELIKAVPQS	1	254	99.6063	0	0	0	253	Cluster_4	ChpA_family_subclass_B2_metallo-beta-lactamase_ImiS_NG_050415.1_cds_WP_063865298.1_1	Cluster_4	SP_Sec_SPI_	26-27	SP_Sec_SPI_	26-27	N_Y_H_T_D	C	H	.	.
B2_1033	GCF_963866865.1	73010	73010	Aeromonas_encheleia	Bacteria-Pseudomonadota-Gammaproteobacteria-Aeromonadales-Aeromonadaceae-Aeromonas-	4472527	NZ_CAWMEL010000013.1	class_B2	452.1	-	11997	12660	11995	12678	GATCTATGGGGTCAAATCCAGGTGAGCGGCCCCGTCTATGTGGTGGAGGATGACTACTACCTCAGGGAGAACTCCATGGTGTACTTCGGCGTCGAGGGGGTGACGGTGGTGGGGGCGACCTGGACGCCGGATACCGCCCGCGAGTTGCACAAGCTTATCAAGAAGGTCAGTCGCAAGCCGGTGCTGGAGGTGATCAACACCAACTACCACACCGATAGGGCCGGCGGTAACGCCTACTGGAAGTCCATCGGCGCGAAAGTGGTCTCGACCCGCCAGACCCGGGATCTGATGCAGAGCGACTGGCAGACCATAGTCGACTTCACCCGCAAGGGGCTGCCGGACTACCCGGACCTGCCGCTGGTGCTGCCGAACGAGGTGCACGACGGCGACTTCAGCCTG…	WP_042652865.1	subclass_B2_metallo-beta-lactamase_partial	DLWGQIQVSGPVYVVEDDYYLRENSMVYFGVEGVTVVGATWTPDTARELHKLIKKVSRKPVLEVINTNYHTDRAGGNAYWKSIGAKVVSTRQTRDLMQSDWQTIVDFTRKGLPDYPDLPLVLPNEVHDGDFSLQDGKVRAFYLGPAHTPDGIFVYFPDEQVLYGNCILKEKLGNLAFADLKAYPQTLARLKAMKLPLKTIVGGHDSPLHGPELIDHYQALLAEAPRS	ORF_OK	TRUE_HIT	kqvsgpvyvvednyyvkensmvyfgakgvtvvgatwtpdtarelhklikrvsskpvlevintnyhtdraggnaywksigakvvatrqtrdlmksdwaeivaftrkglpeypdlplvlpnvvhdgdftlqegkvralyagpahtpdgifvyfpdeqvlygncilkeklgnlsfadvkaypktlerlkalklpiktvigghdsplhgpelidhyealikaaaks	IQVSGPVYVVEDDYYLRENSMVYFGVEGVTVVGATWTPDTARELHKLIKKVSRKPVLEVINTNYHTDRAGGNAYWKSIGAKVVSTRQTRDLMQSDWQTIVDFTRKGLPDYPDLPLVLPNEVHDGDFSLQDGKVRAFYLGPAHTPDGIFVYFPDEQVLYGNCILKEKLGNLAFADLKAYPQTLARLKAMKLPLKTIVGGHDSPLHGPELIDHYQALLAEAPRS	33	254	87.0079	0	0	0	227	Cluster_13	CLUSTER_NOT_IN_NCBI_AMR_REF_DB	Cluster_12	OTHER	0	OTHER	0	N_Y_H_T_D	C	H	.	.
B2_1034	GCF_963867185.1	650	650	Aeromonas_jandaei	Bacteria-Pseudomonadota-Gammaproteobacteria-Aeromonadales-Aeromonadaceae-Aeromonas-	4500350	NZ_CAWMFX010000017.1	class_B2	544.1	+	122979	123738	122992	123741	ATGAAATGCGGATTGGCCGGAGCCGTGGTGCTGATGGCGAGTTTTTGGGGCGGCAGCGTGCGGGCGGCGGGGATCTCCCTCAAGCAGGTGAGCGGCCCTGTCTATGTGGTGGAGGATAACTACTACGTCAAAGAGAACTCCATGGTCTATTTCGGGGCCAAGGGGGTGACTGCGGTGGGGGCGACCTGGACGCCGGATACCGCCCGCGAGTTGCACAAGCTGATCAAACGGGTCAGCAGCAAGCCGGTGCTGGAGGTGATCAACACCAACTACCACACCGATCGGGCGGGCGGTAACGCCTACTGGAAGTCCATCGGGGCCAAGGTGGTGGCGACGCGCCAGACCCGGGATCTGATGAAGAGCGACTGGGCCGAGATTGTTGCCTTTACCCGCAAGGGG…	WP_225628326.1	CphA_family_subclass_B2_metallo-beta-lactamase	MKCGLAGAVVLMASFWGGSVRAAGISLKQVSGPVYVVEDNYYVKENSMVYFGAKGVTAVGATWTPDTARELHKLIKRVSSKPVLEVINTNYHTDRAGGNAYWKSIGAKVVATRQTRDLMKSDWAEIVAFTRKGLPEYPDLPLVLPNVVHDGDFKLQDGKVRAFYAGPAHTPDGIFVYFPDEQVLYGNCILKEKLGNLSFANVKEYPQTIERLKAMKLPIKTVIGGHDSPLHGPELIDHYEELIKAAPQS	ORF_OK	TRUE_HIT	mmkgwikcglagavvllasfwggsvraagislkqvsgpvyvvednyyvkensmvyfgakgvtvvgatwtpdtarelhklikrvsskpvlevintnyhtdraggnaywksigakvvatrqtrdlmksdwaeivaftrkglpeypdlplvlpnvvhdgdftlqegkvralyagpahtpdgifvyfpdeqvlygncilkeklgnlsfadvkaypktlerlkalklpiktvigghdsplhgpelidhyealikaaaks	MMKGWMKCGLAGAVVLMASFWGGSVRAAGISLKQVSGPVYVVEDNYYVKENSMVYFGAKGVTAVGATWTPDTARELHKLIKRVSSKPVLEVINTNYHTDRAGGNAYWKSIGAKVVATRQTRDLMKSDWAEIVAFTRKGLPEYPDLPLVLPNVVHDGDFKLQDGKVRAFYAGPAHTPDGIFVYFPDEQVLYGNCILKEKLGNLSFANVKEYPQTIERLKAMKLPIKTVIGGHDSPLHGPELIDHYEELIKAAPQS	1	254	99.6063	0	0	0	249	Cluster_4	ChpA_family_subclass_B2_metallo-beta-lactamase_ImiS_NG_050415.1_cds_WP_063865298.1_1	Cluster_4	SP_Sec_SPI_	22-23	SP_Sec_SPI_	22-23	N_Y_H_T_D	C	H	.	.
B2_1035	GCF_963869205.1	1382803	1382803	Chromobacterium_amazonense	Bacteria-Pseudomonadota-Betaproteobacteria-Neisseriales-Chromobacteriaceae-Chromobacterium-	4010194	NZ_CAWMOE010000005.1	class_B2	369.2	+	38751	39474	38719	39480	ATGCACAAAATATTCAAGATGGGCGGCCGCCTGGCTGCATGGGCTGTGGCTTTGGTCTGGGCCGCGACGGCTGGCGCCGCGGAAGGCAAGATGGCGTTGAAGCAAGTGCGCGGCGGCGTTTATGTGGCGGAAGACAGCCACTACGCGCGAGAGAATTCGGTGGTGTACATCGGCAGCGCGCACGTGACCGTGGTGGGGGCGACCTGGACGCCGGATACCGCGCGCGAACTGGCCGGGCAAATCCGCCGCGTGACCGATAAGCCGATCACGGAGGTGATCAATACCAACTACCATACCGATCGCGCCGGCGGCAACGCCTACTGGAAGAGCATAGGCGCGCGCATCGTGTCCACTCGGCTGACGGCGGATGAGATGCGCGCCGGCTGGGATGAGGTGGTC…	WP_244886564.1	subclass_B2_metallo-beta-lactamase	MHKIFKMGGRLAAWAVALVWAATAGAAEGKMALKQVRGGVYVAEDSHYARENSVVYIGSAHVTVVGATWTPDTARELAGQIRRVTDKPITEVINTNYHTDRAGGNAYWKSIGARIVSTRLTADEMRAGWDEVVAFTRQGFPDYPSLPLVLPDQVFAGDFSLQNDRVRAFYLGPAHTKDGIFVYFPQEKVLYGNCILKPELGNMRYADLAEYPKTLEKLKALHLDVDTVIAGHQDAEHGPELIDRYLALLHAAQ	ORF_OK	TRUE_HIT	lagavvllasfwggsvraagislkqvsgpvyvvednyyvkensmvyfgakgvtvvgatwtpdtarelhklikrvsskpvlevintnyhtdraggnaywksigakvvatrqtrdlmksdwaeivaftrkglpeypdlplvlpnvvhdgdftlqegkvralyagpahtpdgifvyfpdeqvlygncilkeklgnlsfadvkaypktlerlkalklpiktvigghdsplhgpelidhyealikaa	LAAWAVALVWAATAGAAEGKMALKQVRGGVYVAEDSHYARENSVVYIGSAHVTVVGATWTPDTARELAGQIRRVTDKPITEVINTNYHTDRAGGNAYWKSIGARIVSTRLTADEMRAGWDEVVAFTRQGFPDYPSLPLVLPDQVFAGDFSLQNDRVRAFYLGPAHTKDGIFVYFPQEKVLYGNCILKPELGNMRYADLAEYPKTLEKLKALHLDVDTVIAGHQDAEHGPELIDRYLALLHAA	10	251	94.8819	0	0	0	253	Cluster_6	CLUSTER_NOT_IN_NCBI_AMR_REF_DB	Cluster_6	SP_Sec_SPI_	26-27	SP_Sec_SPI_	26-27	N_Y_H_T_D	C	R	.	.
B2_1036	GCF_963869505.1	645	645	Aeromonas_salmonicida	Bacteria-Pseudomonadota-Gammaproteobacteria-Aeromonadales-Aeromonadaceae-Aeromonas-	4554843	NZ_CAWMOS010000005.1	class_B2	541.2	-	11273	12029	11268	12029	ATGAAAGGTTGGATAAAGTGCGGGCTGGCCGGGGCAGTGGTGCTGGTGGCGAGTTTCTGGGGCGGCAGCGTGCATGCGGCGGCGATCTCCCTCACTCAGGTGAGCGGCCCCGTGTATGTCGTAGAAGATAACTACTACGTCAAAGAGAACTCCATGGTCTATTTCGGGGCCAAGGGGGTGACTGTGGTGGGGGCGACCTGGACGCCGGATACCGCCCGCGAGCTGCACAAGCTGATCAAACGGGTCAGCAACAAGCCTGTGCTGGAGGTGATCAACACCAACTACCACACGGACAGGGCAGGGGGTAACGCCTACTGGAAGTCCATCGGTGCCAAGGTGGTATCGACCCGCCAGACCCGGGATCTGATGAAGAGCGACTGGGCCGAGATCGTCGCCTTT…	WP_058395305.1	CphA_family_subclass_B2_metallo-beta-lactamase	MKGWIKCGLAGAVVLVASFWGGSVHAAAISLTQVSGPVYVVEDNYYVKENSMVYFGAKGVTVVGATWTPDTARELHKLIKRVSNKPVLEVINTNYHTDRAGGNAYWKSIGAKVVSTRQTRDLMKSDWAEIVAFTRKGLPEYPDLPLVLPNVVHDGDFTLQEGKVRAFYAGPAHTPDGIFVYFPDQQVLYGNCILKEKLGNLSFADVKAYPQTLERLKAMKLPIKIVVGGHDSPLHGPELIDHYEALIKAAPQA	ORF_OK	TRUE_HIT	mmkgwikcglagavvllasfwggsvraagislkqvsgpvyvvednyyvkensmvyfgakgvtvvgatwtpdtarelhklikrvsskpvlevintnyhtdraggnaywksigakvvatrqtrdlmksdwaeivaftrkglpeypdlplvlpnvvhdgdftlqegkvralyagpahtpdgifvyfpdeqvlygncilkeklgnlsfadvkaypktlerlkalklpiktvigghdsplhgpelidhyealikaaak	MMKGWIKCGLAGAVVLVASFWGGSVHAAAISLTQVSGPVYVVEDNYYVKENSMVYFGAKGVTVVGATWTPDTARELHKLIKRVSNKPVLEVINTNYHTDRAGGNAYWKSIGAKVVSTRQTRDLMKSDWAEIVAFTRKGLPEYPDLPLVLPNVVHDGDFTLQEGKVRAFYAGPAHTPDGIFVYFPDQQVLYGNCILKEKLGNLSFADVKAYPQTLERLKAMKLPIKIVVGGHDSPLHGPELIDHYEALIKAAPQ	1	253	99.2126	0	0	0	253	Cluster_4	ChpA_family_subclass_B2_metallo-beta-lactamase_ImiS_NG_050415.1_cds_WP_063865298.1_1	Cluster_4	SP_Sec_SPI_	26-27	SP_Sec_SPI_	26-27	N_Y_H_T_D	C	H	.	.
B2_1037	GCF_963869605.1	645	645	Aeromonas_salmonicida	Bacteria-Pseudomonadota-Gammaproteobacteria-Aeromonadales-Aeromonadaceae-Aeromonas-	4710230	NZ_CAWMQR010000041.1	class_B2	532.9	-	11227	11983	11222	11986	ATGATGAAAGGTTGGATCAAATGCGGGTTGGCCGGGGCCCTGGTGCTGGTGGCGAGTATCTGGGGCGGCAGCGTGCATGCGGCGGCGATCTCCCTCACTCAGGTGAGCGGCCCCGTGTATGTCGTAGAGGATAACTACTACGTCAAAGAGAACTCCATGGTCTATTTCGGGGCCAAGGGAGTGACGGTAGTGGGGGCGACCTGGACGCCGGATACCGCCCGAGAGCTGCACAAGCTGATCAAGCGGGTCAGCAACAAGCCAGTGCTGGAGGTGATCAACACCAACTACCACACGGACAGGGCAGGGGGTAACGCCTACTGGAAGTCCATCGGTGCCAAGGTGGTGTCGACCCGCCAGACCCGGGATCTGATGAAGAGCGACTGGGCCGAGATCGTCGCC…	WP_081100768.1	CphA_family_subclass_B2_metallo-beta-lactamase	MMKGWIKCGLAGALVLVASIWGGSVHAAAISLTQVSGPVYVVEDNYYVKENSMVYFGAKGVTVVGATWTPDTARELHKLIKRVSNKPVLEVINTNYHTDRAGGNAYWKSIGAKVVSTRQTRDLMKSDWAEIVAFTRKGLPEYPDLPLVLPNVVHDGDFTLQEGKVHAFYTGPAHTPDGIFVYFPDQQVLYGNCILKEKLGNLSFADVKAYPQTLERLKAMKLPIKIVVGGHDSPLHGPELIDHYQSLIKAAPQA	ORF_OK	TRUE_HIT	mmkgwikcglagavvllasfwggsvraagislkqvsgpvyvvednyyvkensmvyfgakgvtvvgatwtpdtarelhklikrvsskpvlevintnyhtdraggnaywksigakvvatrqtrdlmksdwaeivaftrkglpeypdlplvlpnvvhdgdftlqegkvralyagpahtpdgifvyfpdeqvlygncilkeklgnlsfadvkaypktlerlkalklpiktvigghdsplhgpelidhyealikaaak	MMKGWIKCGLAGALVLVASIWGGSVHAAAISLTQVSGPVYVVEDNYYVKENSMVYFGAKGVTVVGATWTPDTARELHKLIKRVSNKPVLEVINTNYHTDRAGGNAYWKSIGAKVVSTRQTRDLMKSDWAEIVAFTRKGLPEYPDLPLVLPNVVHDGDFTLQEGKVHAFYTGPAHTPDGIFVYFPDQQVLYGNCILKEKLGNLSFADVKAYPQTLERLKAMKLPIKIVVGGHDSPLHGPELIDHYQSLIKAAPQ	1	253	99.2126	0	0	0	254	Cluster_4	ChpA_family_subclass_B2_metallo-beta-lactamase_ImiS_NG_050415.1_cds_WP_063865298.1_1	Cluster_4	SP_Sec_SPI_	27-28	SP_Sec_SPI_	27-28	N_Y_H_T_D	C	H	.	.
B2_1038	GCF_963869795.1	196024	196024	Aeromonas_dhakensis	Bacteria-Pseudomonadota-Gammaproteobacteria-Aeromonadales-Aeromonadaceae-Aeromonas-	4783170	NZ_CAWMOB010000001.1	class_B2	535.2	+	1674618	1675377	1674619	1675380	ATGAAAGGTTGGATAAAGTGCGGGCTGGCCGGCGCCGTGGTGCTGGTGGCGAGCTTCTGGGGTGGCAGCGTGCGGGCGGCGGGGATGTCGCTGACGCAAGTGAGCGGCCCTGTCTATGTGGTCGAGGACAACTACTACATACAGGAAAACTCCATGGTCTATTTCGGGGCCAAGGGGGTGACGGTAGTGGGGGCGACCTGGACGCCAGATACCGCCCGTGAGCTGCACAAGCTGATCAAACGGGTCAGCCGCCAGCCGGTGCTGGAGGTGATCAACACCAACTACCACACCGACCGGGCGGGCGGTAACGCCTACTGGAAGTCCATCGGTGCCAAGGTGGTGGCGACTCGCCAGACCCGGGATCTGATGAAGAGCGACTGGGCCGAGATTGTCGCCTTT…	WP_054544101.1	CphA_family_subclass_B2_metallo-beta-lactamase	MKGWIKCGLAGAVVLVASFWGGSVRAAGMSLTQVSGPVYVVEDNYYIQENSMVYFGAKGVTVVGATWTPDTARELHKLIKRVSRQPVLEVINTNYHTDRAGGNAYWKSIGAKVVATRQTRDLMKSDWAEIVAFTRKGLPDYPDLPLVLPNVVHDGDFTLQEGKLRAFYAGPAHTPDGIFVYFPDQQVLYGNCILKEKLGNLSFADVKAYPQTIERLKAMKLPIKTVVGGHDSPLHGPELIDHYEALIKAVPQS	ORF_OK	TRUE_HIT	mmkgwikcglagavvllasfwggsvraagislkqvsgpvyvvednyyvkensmvyfgakgvtvvgatwtpdtarelhklikrvsskpvlevintnyhtdraggnaywksigakvvatrqtrdlmksdwaeivaftrkglpeypdlplvlpnvvhdgdftlqegkvralyagpahtpdgifvyfpdeqvlygncilkeklgnlsfadvkaypktlerlkalklpiktvigghdsplhgpelidhyealikaaaks	MMKGWIKCGLAGAVVLVASFWGGSVRAAGMSLTQVSGPVYVVEDNYYIQENSMVYFGAKGVTVVGATWTPDTARELHKLIKRVSRQPVLEVINTNYHTDRAGGNAYWKSIGAKVVATRQTRDLMKSDWAEIVAFTRKGLPDYPDLPLVLPNVVHDGDFTLQEGKLRAFYAGPAHTPDGIFVYFPDQQVLYGNCILKEKLGNLSFADVKAYPQTIERLKAMKLPIKTVVGGHDSPLHGPELIDHYEALIKAVPQS	1	254	99.6063	0	0	0	253	Cluster_4	ChpA_family_subclass_B2_metallo-beta-lactamase_ImiS_NG_050415.1_cds_WP_063865298.1_1	Cluster_4	SP_Sec_SPI_	26-27	SP_Sec_SPI_	26-27	N_Y_H_T_D	C	H	.	.
B2_1039	GCF_963869835.1	196024	196024	Aeromonas_dhakensis	Bacteria-Pseudomonadota-Gammaproteobacteria-Aeromonadales-Aeromonadaceae-Aeromonas-	4750839	NZ_CAWMPD010000020.1	class_B2	542.8	+	257	1016	258	1019	ATGAAAGGTTGGATAAAGTGCGGGCTGGCCGGGGCCCTGGTGCTGATGGCGAGTTTCTGGGGTGGCAGCGTGCGAGCGGCGGGGATATCGCTGACGCAGGTAAGCGGTCCTGTCTATGTAGTGGAGGACAACTACTACATACAGGAAAACTCCATGGTCTATTTCGGGGCCAAGGGAGTGACTGTGGTGGGGGCGACCTGGACGCCAGATACCGCCCGTGAGCTGCACAAGCTGATCAAACGGGTCAGCCGCCAGCCGGTGCTGGAGGTGATCAACACCAACTACCACACCGACCGGGCGGGTGGTAACGCCTACTGGAAGTCCATCGGTGCCAAGGTGGTATCGACCCGTCAGACCCGGGATCTGATGAAGAGCGACTGGGCCGAGATTGTCGCCTTT…	WP_065017923.1	CphA_family_subclass_B2_metallo-beta-lactamase	MKGWIKCGLAGALVLMASFWGGSVRAAGISLTQVSGPVYVVEDNYYIQENSMVYFGAKGVTVVGATWTPDTARELHKLIKRVSRQPVLEVINTNYHTDRAGGNAYWKSIGAKVVSTRQTRDLMKSDWAEIVAFTRKGLPEYPDLPLVLPNVVHEGDFMLQEGKLRAFYAGPAHTPDGIFVYFPDQQVLYGNCILKEKLGNLSFADVKAYPQTLERLKAMKLPIKTVVGGHDSPLHGPELIDHYEALIKAAPQS	ORF_OK	TRUE_HIT	mmkgwikcglagavvllasfwggsvraagislkqvsgpvyvvednyyvkensmvyfgakgvtvvgatwtpdtarelhklikrvsskpvlevintnyhtdraggnaywksigakvvatrqtrdlmksdwaeivaftrkglpeypdlplvlpnvvhdgdftlqegkvralyagpahtpdgifvyfpdeqvlygncilkeklgnlsfadvkaypktlerlkalklpiktvigghdsplhgpelidhyealikaaaks	MMKGWIKCGLAGALVLMASFWGGSVRAAGISLTQVSGPVYVVEDNYYIQENSMVYFGAKGVTVVGATWTPDTARELHKLIKRVSRQPVLEVINTNYHTDRAGGNAYWKSIGAKVVSTRQTRDLMKSDWAEIVAFTRKGLPEYPDLPLVLPNVVHEGDFMLQEGKLRAFYAGPAHTPDGIFVYFPDQQVLYGNCILKEKLGNLSFADVKAYPQTLERLKAMKLPIKTVVGGHDSPLHGPELIDHYEALIKAAPQS	1	254	99.6063	0	0	0	253	Cluster_4	ChpA_family_subclass_B2_metallo-beta-lactamase_ImiS_NG_050415.1_cds_WP_063865298.1_1	Cluster_4	SP_Sec_SPI_	26-27	SP_Sec_SPI_	26-27	N_Y_H_T_D	C	H	.	.
B2_104	GCF_006246395.1	654	654	Aeromonas_veronii	Bacteria-Pseudomonadota-Gammaproteobacteria-Aeromonadales-Aeromonadaceae-Aeromonas-	4575388	NZ_NKWX01000023.1	class_B2	543.1	+	95460	96219	95458	96222	ATGATGAAAGGTTGGATGAAGTGTGGATTGGCCGGGGCTGTGGTGCTGATGGCGAGTTTCTGGGGCGGCAGCGTGCGGGCGGCGGGGATCGAGCTCAAGCAGGTGAGTGGCCCTGTCTATGTTGTTGAAGACAACTACTACGTCAAAGAGAACTCCATGGTCTATTTCGGGGCCAAGGGGGTGACGGTGGTGGGGGCGACCTGGACGCCGGATACCGCCCGCGAGCTGCACAAGCTCATTAAACGGGTCAGCAGCAAGCCGGTACTGGAGGTGATCAACACCAACTACCACACAGATCGGGCGGGCGGTAATGCCTACTGGAAGTCTATCGGGGCCAAGTTGGTGGCGACGCGCCAGACCCGGGATCTGATGAAGAGCGACTGGGCCGAGATTGTCGCC…	WP_124928611.1	CphA_family_subclass_B2_metallo-beta-lactamase	MMKGWMKCGLAGAVVLMASFWGGSVRAAGIELKQVSGPVYVVEDNYYVKENSMVYFGAKGVTVVGATWTPDTARELHKLIKRVSSKPVLEVINTNYHTDRAGGNAYWKSIGAKLVATRQTRDLMKSDWAEIVAFTRKGLPEYPDLPLVLPNVVHDGDFKLQEGKVRAFFAGPAHTPDGIFVYFPDEQVLYGNCILKEKLGNLSFANVKAYPQTIERLKAMKLPIKTVIGGHDSPLHGPELIDHYEELIKAAPQS	ORF_OK	TRUE_HIT	mmkgwikcglagavvllasfwggsvraagislkqvsgpvyvvednyyvkensmvyfgakgvtvvgatwtpdtarelhklikrvsskpvlevintnyhtdraggnaywksigakvvatrqtrdlmksdwaeivaftrkglpeypdlplvlpnvvhdgdftlqegkvralyagpahtpdgifvyfpdeqvlygncilkeklgnlsfadvkaypktlerlkalklpiktvigghdsplhgpelidhyealikaaaks	MMKGWMKCGLAGAVVLMASFWGGSVRAAGIELKQVSGPVYVVEDNYYVKENSMVYFGAKGVTVVGATWTPDTARELHKLIKRVSSKPVLEVINTNYHTDRAGGNAYWKSIGAKLVATRQTRDLMKSDWAEIVAFTRKGLPEYPDLPLVLPNVVHDGDFKLQEGKVRAFFAGPAHTPDGIFVYFPDEQVLYGNCILKEKLGNLSFANVKAYPQTIERLKAMKLPIKTVIGGHDSPLHGPELIDHYEELIKAAPQS	1	254	99.6063	0	0	0	254	Cluster_4	ChpA_family_subclass_B2_metallo-beta-lactamase_ImiS_NG_050415.1_cds_WP_063865298.1_1	Cluster_4	SP_Sec_SPI_	27-28	SP_Sec_SPI_	27-28	N_Y_H_T_D	C	H	.	.
B2_1042	GCF_963871415.1	654	654	Aeromonas_veronii	Bacteria-Pseudomonadota-Gammaproteobacteria-Aeromonadales-Aeromonadaceae-Aeromonas-	4919147	NZ_CAWMVB010000007.1	class_B2	542.1	-	13192	13951	13190	13951	ATGAAAGGTTGGATAAAGTGCGGGTTGGCCGGGGCCGTGGTGCTGATGGCGAGTTTCTGGGGTGGCAGCGTGCGGGCGGCGGGGATCTCCCTCAAGCAGGTGAGCGGCCCTGTCTATGTGGTGGAGGACAACTACTACGTCAAAGAGAACTCCATGGTCTATTTCGGGGCCAAGGGGGTGACTGTGGTGGGGGCGACCTGGACGCCGGATACCGCCCGCGAGCTGCACAAGCTGATAAAAAGAGTCAGCAGCAAGCCGGTGCTGGAGGTGATCAACACCAACTACCACACCGACCGGGCGGGCGGTAACGCCTACTGGAAGTCCATCGGGGCCAAGGTGGTGGCGACGCGCCAGACCCGGGATCTGATGAAGAGCGACTGGGCCGAGATTGTCGCCTTT…	WP_075114581.1	CphA_family_subclass_B2_metallo-beta-lactamase	MKGWIKCGLAGAVVLMASFWGGSVRAAGISLKQVSGPVYVVEDNYYVKENSMVYFGAKGVTVVGATWTPDTARELHKLIKRVSSKPVLEVINTNYHTDRAGGNAYWKSIGAKVVATRQTRDLMKSDWAEIVAFTRKGLPEYPDLPLVLPNVVHDGDFTLQDGKVRAFYAGPAHTPDGIFVYFPDEQVLYGNCILKEKLGNLSFANVKAYPQTIERLKAMKLPIKTVIGGHDSPLHGPELIDHYEELIKAVPQS	ORF_OK	TRUE_HIT	mmkgwikcglagavvllasfwggsvraagislkqvsgpvyvvednyyvkensmvyfgakgvtvvgatwtpdtarelhklikrvsskpvlevintnyhtdraggnaywksigakvvatrqtrdlmksdwaeivaftrkglpeypdlplvlpnvvhdgdftlqegkvralyagpahtpdgifvyfpdeqvlygncilkeklgnlsfadvkaypktlerlkalklpiktvigghdsplhgpelidhyealikaaaks	MMKGWIKCGLAGAVVLMASFWGGSVRAAGISLKQVSGPVYVVEDNYYVKENSMVYFGAKGVTVVGATWTPDTARELHKLIKRVSSKPVLEVINTNYHTDRAGGNAYWKSIGAKVVATRQTRDLMKSDWAEIVAFTRKGLPEYPDLPLVLPNVVHDGDFTLQDGKVRAFYAGPAHTPDGIFVYFPDEQVLYGNCILKEKLGNLSFANVKAYPQTIERLKAMKLPIKTVIGGHDSPLHGPELIDHYEELIKAVPQS	1	254	99.6063	0	0	0	253	Cluster_4	ChpA_family_subclass_B2_metallo-beta-lactamase_ImiS_NG_050415.1_cds_WP_063865298.1_1	Cluster_4	SP_Sec_SPI_	26-27	SP_Sec_SPI_	26-27	N_Y_H_T_D	C	H	.	.
B2_1043	GCF_963873515.1	645	645	Aeromonas_salmonicida	Bacteria-Pseudomonadota-Gammaproteobacteria-Aeromonadales-Aeromonadaceae-Aeromonas-	4935342	NZ_CAWNBK010000001.1	class_B2	533.9	+	4591026	4591782	4591024	4591788	ATGATGAAAGGTTGGATGAAATGTGGGCTGGCCGGTGCCCTGGTGCTGATGGCGAGTTTCTGGGGCGGCAGCGTGCATGCGGCAGCTATCTCCCTCACTCAGGTGAGCGGCCCTGTCTATGTGGTGGAGGACAACTACTACGTCAAAGAGAACTCCATGGTCTATTTCGGGGCCAAGGGGGTGACTGTGGTAGGGGCGACCTGGACGCCGGATACCGCCCGCGAGCTGCACAAGCTGATCAAGCGGGTCAGCAACAAGCCTGTGCTGGAGGTGATCAACACCAATTACCACACGGACAGGGCAGGGGGGAACGCCTACTGGAAGTCCATCGGTGCCAAGGTGGTATCGACCCGCCAGACCCGGGATCTGATGAAGAGCGACTGGGCCGAGATCGTCGCC…	WP_087757157.1	CphA_family_subclass_B2_metallo-beta-lactamase	MMKGWMKCGLAGALVLMASFWGGSVHAAAISLTQVSGPVYVVEDNYYVKENSMVYFGAKGVTVVGATWTPDTARELHKLIKRVSNKPVLEVINTNYHTDRAGGNAYWKSIGAKVVSTRQTRDLMKSDWAEIVAFTRKGLPEYPDLPLVLPNVVHDGDFSLQEGKVRAFYAGPAHTPDGIFVYFPDQQVLYGNCILKEKLGNLSFADVKAYPQTLERLKAMKLPIKIVVGGHDSPLHGPELIDHYQSLIKAAPQA	ORF_OK	TRUE_HIT	mmkgwikcglagavvllasfwggsvraagislkqvsgpvyvvednyyvkensmvyfgakgvtvvgatwtpdtarelhklikrvsskpvlevintnyhtdraggnaywksigakvvatrqtrdlmksdwaeivaftrkglpeypdlplvlpnvvhdgdftlqegkvralyagpahtpdgifvyfpdeqvlygncilkeklgnlsfadvkaypktlerlkalklpiktvigghdsplhgpelidhyealikaaak	MMKGWMKCGLAGALVLMASFWGGSVHAAAISLTQVSGPVYVVEDNYYVKENSMVYFGAKGVTVVGATWTPDTARELHKLIKRVSNKPVLEVINTNYHTDRAGGNAYWKSIGAKVVSTRQTRDLMKSDWAEIVAFTRKGLPEYPDLPLVLPNVVHDGDFSLQEGKVRAFYAGPAHTPDGIFVYFPDQQVLYGNCILKEKLGNLSFADVKAYPQTLERLKAMKLPIKIVVGGHDSPLHGPELIDHYQSLIKAAPQ	1	253	99.2126	0	0	0	254	Cluster_4	ChpA_family_subclass_B2_metallo-beta-lactamase_ImiS_NG_050415.1_cds_WP_063865298.1_1	Cluster_4	SP_Sec_SPI_	27-28	SP_Sec_SPI_	27-28	N_Y_H_T_D	C	H	.	.
B2_1044	GCF_963875315.1	645	645	Aeromonas_salmonicida	Bacteria-Pseudomonadota-Gammaproteobacteria-Aeromonadales-Aeromonadaceae-Aeromonas-	4714983	NZ_CAWNLH010000014.1	class_B2	534.2	-	10973	11729	10968	11732	ATGATGAAAGGTTGGATGAAGTGCGGGTTGGCCGGGGCCCTGGTGCTGGTGGCGAGTATCTGGGGCGGCAGCGTGCATGCGGCGGCGATCTCCCTCACTCAAGTGAGCGGCCCCGTCTATGTGGTGGAGGACAACTACTACGTCAAGGAGAACTCCATGGTCTATTTCGGGGCCAAGGGGGTGACGGTAGTGGGGGCGACCTGGACGCCGGATACCGCCCGCGAGCTGCACAAGCTGATCAAGCGGGTCAGCAACAAGCCTGTGCTGGAGGTGATCAACACCAATTACCACACGGACAGGGCAGGGGGGAACGCCTACTGGAAGTCCATCGGTGCCAAGGTGGTATCGACCCGCCAGACCCGGGAGCTGATGAAGAGCGACTGGGCCGAGATCGTCGCC…	WP_096118844.1	CphA_family_subclass_B2_metallo-beta-lactamase	MMKGWMKCGLAGALVLVASIWGGSVHAAAISLTQVSGPVYVVEDNYYVKENSMVYFGAKGVTVVGATWTPDTARELHKLIKRVSNKPVLEVINTNYHTDRAGGNAYWKSIGAKVVSTRQTRELMKSDWAEIVAFTRKGLPEYPDLPLVLPNVVHDGDFTLQEGKVRAFYAGPAHTPDGIFVYFPDRQVLYGNCILKEKLGNLSFADVKAYPQTLERLKAMKLPIKIVVGGHDSPLHGPELIDHYQSLIKAAPQA	ORF_OK	TRUE_HIT	mmkgwikcglagavvllasfwggsvraagislkqvsgpvyvvednyyvkensmvyfgakgvtvvgatwtpdtarelhklikrvsskpvlevintnyhtdraggnaywksigakvvatrqtrdlmksdwaeivaftrkglpeypdlplvlpnvvhdgdftlqegkvralyagpahtpdgifvyfpdeqvlygncilkeklgnlsfadvkaypktlerlkalklpiktvigghdsplhgpelidhyealikaaak	MMKGWMKCGLAGALVLVASIWGGSVHAAAISLTQVSGPVYVVEDNYYVKENSMVYFGAKGVTVVGATWTPDTARELHKLIKRVSNKPVLEVINTNYHTDRAGGNAYWKSIGAKVVSTRQTRELMKSDWAEIVAFTRKGLPEYPDLPLVLPNVVHDGDFTLQEGKVRAFYAGPAHTPDGIFVYFPDRQVLYGNCILKEKLGNLSFADVKAYPQTLERLKAMKLPIKIVVGGHDSPLHGPELIDHYQSLIKAAPQ	1	253	99.2126	0	0	0	254	Cluster_4	ChpA_family_subclass_B2_metallo-beta-lactamase_ImiS_NG_050415.1_cds_WP_063865298.1_1	Cluster_4	SP_Sec_SPI_	27-28	SP_Sec_SPI_	27-28	N_Y_H_T_D	C	H	.	.
B2_1045	GCF_963877245.1	646	646	Aeromonas_sobria	Bacteria-Pseudomonadota-Gammaproteobacteria-Aeromonadales-Aeromonadaceae-Aeromonas-	4796048	NZ_CAWNSS010000064.1	class_B2	550.4	-	13147	13906	13145	13909	ATGATGAAAGGTTGGATGAAGTGTGGATTGGCCGGGGCCGTGGTGCTGATGGCGAGTTTCTGGGGCGGCAGCGTGCGGGCGGCGGGGATCTCCCTTAAGCAGGTAAGCGGCCCGGTCTATGTGGTAGAGGACAACTACTACGTAAAGGAAAACTCCATGGTCTATTTCGGGGCCAAGGGGGTGACGGTGGTGGGGGCGACCTGGACGCCGGATACCGCCCGCGAGCTGCACAAGCTGATCAAACGGGTCAGCAGCAAGCCGGTGCTGGAGGTGATCAACACCAACTACCACACCGATCGGGCGGGCGGTAACGCCTACTGGAAGTCCATCGGCGCCAAGGTGGTGGCGACGCGCCAGACCCGGGATCTGATGAAGAGCGACTGGGCCGAGATTGTCGCC…	WP_101320234.1	CphA_family_subclass_B2_metallo-beta-lactamase	MMKGWMKCGLAGAVVLMASFWGGSVRAAGISLKQVSGPVYVVEDNYYVKENSMVYFGAKGVTVVGATWTPDTARELHKLIKRVSSKPVLEVINTNYHTDRAGGNAYWKSIGAKVVATRQTRDLMKSDWAEIVAFTRKGLPEYPDLPLVLPNVVHEGDFTLQEGKVRAFYAGPAHTPDGIFVYFPDEQVLYGNCILKEKLGNLSFANVKAYPQTIERLKAMKLPIKTVIGGHDSPLHGPELIDHYEALIKAAPQS	ORF_OK	TRUE_HIT	mmkgwikcglagavvllasfwggsvraagislkqvsgpvyvvednyyvkensmvyfgakgvtvvgatwtpdtarelhklikrvsskpvlevintnyhtdraggnaywksigakvvatrqtrdlmksdwaeivaftrkglpeypdlplvlpnvvhdgdftlqegkvralyagpahtpdgifvyfpdeqvlygncilkeklgnlsfadvkaypktlerlkalklpiktvigghdsplhgpelidhyealikaaaks	MMKGWMKCGLAGAVVLMASFWGGSVRAAGISLKQVSGPVYVVEDNYYVKENSMVYFGAKGVTVVGATWTPDTARELHKLIKRVSSKPVLEVINTNYHTDRAGGNAYWKSIGAKVVATRQTRDLMKSDWAEIVAFTRKGLPEYPDLPLVLPNVVHEGDFTLQEGKVRAFYAGPAHTPDGIFVYFPDEQVLYGNCILKEKLGNLSFANVKAYPQTIERLKAMKLPIKTVIGGHDSPLHGPELIDHYEALIKAAPQS	1	254	99.6063	0	0	0	254	Cluster_4	ChpA_family_subclass_B2_metallo-beta-lactamase_ImiS_NG_050415.1_cds_WP_063865298.1_1	Cluster_4	SP_Sec_SPI_	27-28	SP_Sec_SPI_	27-28	N_Y_H_T_D	C	H	.	.
B2_1046	GCF_963878185.1	645	645	Aeromonas_salmonicida	Bacteria-Pseudomonadota-Gammaproteobacteria-Aeromonadales-Aeromonadaceae-Aeromonas-	4899812	NZ_CAWNWF010000012.1	class_B2	535.3	-	4776	5532	4771	5532	ATGAAAGGTTGGATAAAGTGCGGGCTGGCCGGAGCTGTGGTGCTGGTGGCGAGTATATGGGGCGGCAGCGTGCATGCGGCGGCGATATCGCTTACTCAGGTGAGCGGCCCTGTGTATGTGGTGGAGGACAACTACTACGTCAAAGAGAACTCCATGGTCTATTTCGGGGCCAAGGGGGTGACGGTAGTGGGGGCGACCTGGACGCCGGATACCGCCCGCGAGCTGCACAAGCTGATCAAACGGGTCAGCAACAAGCCTGTGCTGGAGGTGATCAACACTAACTACCACACGGACAGGGCAGGGGGTAACGCCTACTGGAAGTCCATCGGTGCCAAGGTGGTCTCGACCCGCCAGACCCGGGATCTGATGAAGAGCGACTGGGCCGAGATCGTCGCCTTT…	WP_258394209.1	CphA_family_subclass_B2_metallo-beta-lactamase	MKGWIKCGLAGAVVLVASIWGGSVHAAAISLTQVSGPVYVVEDNYYVKENSMVYFGAKGVTVVGATWTPDTARELHKLIKRVSNKPVLEVINTNYHTDRAGGNAYWKSIGAKVVSTRQTRDLMKSDWAEIVAFTRKGLLEYPDLPLVLPNVVHDGDFTLQEGKVRAFYAGPAHTPDGIFVYFPDQQVLYGNCILKEKLGNLSFADVKAYPQTLERLKAMKLPIKIVVGGHDSPLHGPELIDHYETLIKAAPQA	ORF_OK	TRUE_HIT	mmkgwikcglagavvllasfwggsvraagislkqvsgpvyvvednyyvkensmvyfgakgvtvvgatwtpdtarelhklikrvsskpvlevintnyhtdraggnaywksigakvvatrqtrdlmksdwaeivaftrkglpeypdlplvlpnvvhdgdftlqegkvralyagpahtpdgifvyfpdeqvlygncilkeklgnlsfadvkaypktlerlkalklpiktvigghdsplhgpelidhyealikaaak	MMKGWIKCGLAGAVVLVASIWGGSVHAAAISLTQVSGPVYVVEDNYYVKENSMVYFGAKGVTVVGATWTPDTARELHKLIKRVSNKPVLEVINTNYHTDRAGGNAYWKSIGAKVVSTRQTRDLMKSDWAEIVAFTRKGLLEYPDLPLVLPNVVHDGDFTLQEGKVRAFYAGPAHTPDGIFVYFPDQQVLYGNCILKEKLGNLSFADVKAYPQTLERLKAMKLPIKIVVGGHDSPLHGPELIDHYETLIKAAPQ	1	253	99.2126	0	0	0	253	Cluster_4	ChpA_family_subclass_B2_metallo-beta-lactamase_ImiS_NG_050415.1_cds_WP_063865298.1_1	Cluster_4	SP_Sec_SPI_	26-27	SP_Sec_SPI_	26-27	N_Y_H_T_D	C	H	.	.
B2_1047	GCF_963878195.1	2056852	2056852	Aeromonas_sp_HMWF016	Bacteria-Pseudomonadota-Gammaproteobacteria-Aeromonadales-Aeromonadaceae-Aeromonas-unclassified_Aeromonas-	4523627	NZ_CAWNWX010000069.1	class_B2	544.3	-	11003	11762	11001	11765	ATGATGAAAGGTTGGATGAAGTGCGGATTGGCCGGGGCCGTGGTGCTGATGGCGAGTTTCTGGGGCGGCAGCGTGCGGGCGGCGGGGATCGAGCTCAAGCAGGTGAGCGGCCCTGTCTATGTGGTGGAGGACAACTACTACGTCAAAGAGAACTCCATGGTCTATTTCGGGGCCAAGGGGGTGACGGTGGTGGGGGCGACCTGGACGCCGGATACCGCCCGCGAGCTGCACAAGCTCATTAAACGGGTCAGCAGCAAGCCGGTGCTGGAGGTGATCAACACCAACTACCACACCGATCGGGCGGGCGGTAACGCCTACTGGAAGTCCATCGGGGCCAAGGTGGTGGCGACGCGCCAGACCCGGGATCTGATGAAGAGCGACTGGGCCGAGATTGTCGCC…	WP_108573452.1	CphA_family_subclass_B2_metallo-beta-lactamase	MMKGWMKCGLAGAVVLMASFWGGSVRAAGIELKQVSGPVYVVEDNYYVKENSMVYFGAKGVTVVGATWTPDTARELHKLIKRVSSKPVLEVINTNYHTDRAGGNAYWKSIGAKVVATRQTRDLMKSDWAEIVAFTRKGLPEYPDLPLVLPNVVHDGDFKLQEGKVRAFYAGPAHTPDGIFVYFPDEQVLYGNCILKEKLGNLSFANVKEYPQTIERLKAMKLPIKTVIGGHDSPLHGPELIEHYEALIKAAPQS	ORF_OK	TRUE_HIT	mmkgwikcglagavvllasfwggsvraagislkqvsgpvyvvednyyvkensmvyfgakgvtvvgatwtpdtarelhklikrvsskpvlevintnyhtdraggnaywksigakvvatrqtrdlmksdwaeivaftrkglpeypdlplvlpnvvhdgdftlqegkvralyagpahtpdgifvyfpdeqvlygncilkeklgnlsfadvkaypktlerlkalklpiktvigghdsplhgpelidhyealikaaaks	MMKGWMKCGLAGAVVLMASFWGGSVRAAGIELKQVSGPVYVVEDNYYVKENSMVYFGAKGVTVVGATWTPDTARELHKLIKRVSSKPVLEVINTNYHTDRAGGNAYWKSIGAKVVATRQTRDLMKSDWAEIVAFTRKGLPEYPDLPLVLPNVVHDGDFKLQEGKVRAFYAGPAHTPDGIFVYFPDEQVLYGNCILKEKLGNLSFANVKEYPQTIERLKAMKLPIKTVIGGHDSPLHGPELIEHYEALIKAAPQS	1	254	99.6063	0	0	0	254	Cluster_4	ChpA_family_subclass_B2_metallo-beta-lactamase_ImiS_NG_050415.1_cds_WP_063865298.1_1	Cluster_4	SP_Sec_SPI_	27-28	SP_Sec_SPI_	27-28	N_Y_H_T_D	C	H	.	.
B2_1048	GCF_963878735.1	654	654	Aeromonas_veronii	Bacteria-Pseudomonadota-Gammaproteobacteria-Aeromonadales-Aeromonadaceae-Aeromonas-	4407499	NZ_CAWNYM010000044.1	class_B2	545.1	-	12532	13291	12530	13294	ATGATGAAAGGTTGGATGAAGTGCACATTGGCCGGGGCCGTGGTGCTGATGGCGAGTTTCTGGGGCGGCAGCGTGCGGGCGGCGGGGATCTCCCTCAAACAGGTGAGCGGCCCTGTCTATGTGGTGGAGGATAACTACTACGTCAAAGAGAACTCCATGGTCTATTTCGGGGCCAAGGGAGTGACGGTGGTGGGGGCGACCTGGACGCCGGATACTGCTCGCGAGCTGCACAAGCTGATTAAACGGGTCAGCAGCAAGCCGGTGCTGGAGGTGATCAACACCAACTACCACACCGACCGGGCGGGCGGTAACGCCTACTGGAAGTCCATCGGGGCCAAGGTGGTGGCGACGCGCCAGACCCGGGATCTGATGAAGAGCGACTGGGCCGAGATTGTCGCC…	WP_083851951.1	CphA_family_subclass_B2_metallo-beta-lactamase	MMKGWMKCTLAGAVVLMASFWGGSVRAAGISLKQVSGPVYVVEDNYYVKENSMVYFGAKGVTVVGATWTPDTARELHKLIKRVSSKPVLEVINTNYHTDRAGGNAYWKSIGAKVVATRQTRDLMKSDWAEIVAFTRKGLPEYPDLPLVLPNVVHDGDFTLQEGKVRAFYAGPAHTPDGIFVYFPDEQVLYGNCILKEKLGNLSFANVKAYPQTIERLKAMKLPIKTVIGGHDSPLHGPELIDHYEELIKAVPQS	ORF_OK	TRUE_HIT	mmkgwikcglagavvllasfwggsvraagislkqvsgpvyvvednyyvkensmvyfgakgvtvvgatwtpdtarelhklikrvsskpvlevintnyhtdraggnaywksigakvvatrqtrdlmksdwaeivaftrkglpeypdlplvlpnvvhdgdftlqegkvralyagpahtpdgifvyfpdeqvlygncilkeklgnlsfadvkaypktlerlkalklpiktvigghdsplhgpelidhyealikaaaks	MMKGWMKCTLAGAVVLMASFWGGSVRAAGISLKQVSGPVYVVEDNYYVKENSMVYFGAKGVTVVGATWTPDTARELHKLIKRVSSKPVLEVINTNYHTDRAGGNAYWKSIGAKVVATRQTRDLMKSDWAEIVAFTRKGLPEYPDLPLVLPNVVHDGDFTLQEGKVRAFYAGPAHTPDGIFVYFPDEQVLYGNCILKEKLGNLSFANVKAYPQTIERLKAMKLPIKTVIGGHDSPLHGPELIDHYEELIKAVPQS	1	254	99.6063	0	0	0	254	Cluster_4	ChpA_family_subclass_B2_metallo-beta-lactamase_ImiS_NG_050415.1_cds_WP_063865298.1_1	Cluster_4	SP_Sec_SPI_	27-28	SP_Sec_SPI_	27-28	N_Y_H_T_D	C	H	.	.
B2_1049	GCF_963878935.1	654	654	Aeromonas_veronii	Bacteria-Pseudomonadota-Gammaproteobacteria-Aeromonadales-Aeromonadaceae-Aeromonas-	4619673	NZ_CAWNZF010000005.1	class_B2	546.6	-	9597	10356	9595	10359	ATGATGAAAGGTTGGATGAAGTGTGGATTGGCCGGGGCCGTGGTGCTGATGGCGAGTTTCTGGGGCGGCAGCGTGCGGGCGGCGGGGATCGAGCTCAAGCAGGTGAGTGGCCCTGTCTATGTTGTTGAAGATAACTACTACGTAAAGGAAAACTCCATGGTCTATTTCGGGGCCAAGGGGGTGACTGTGGTGGGGGCGACCTGGACGCCGGATACCGCCCGCGAGCTGCACAAGCTGATAAAAAGAGTCAGCAGCAAGCCGGTGCTGGAGGTGATCAACACCAACTACCACACCGACCGGGCGGGCGGTAACGCCTACTGGAAGTCCATCGGCGCCAAGGTGGTGGCGACGCGCCAGACCCGGGATCTGATGAAGAGCGACTGGGCCGAGATTGTCGCC…	WP_081043470.1	CphA_family_subclass_B2_metallo-beta-lactamase	MMKGWMKCGLAGAVVLMASFWGGSVRAAGIELKQVSGPVYVVEDNYYVKENSMVYFGAKGVTVVGATWTPDTARELHKLIKRVSSKPVLEVINTNYHTDRAGGNAYWKSIGAKVVATRQTRDLMKSDWAEIVAFTRKGLPEYPDLPLVLPNVVHDGDFTLQEGKVRAFYAGPAHTPDGIFVYFPDEQVLYGNCILKEKLGNLSFANVKAYPQTIERLKAMKLPIKTVIGGHDSPLHGPELIDHYEELIKAAPQS	ORF_OK	TRUE_HIT	mmkgwikcglagavvllasfwggsvraagislkqvsgpvyvvednyyvkensmvyfgakgvtvvgatwtpdtarelhklikrvsskpvlevintnyhtdraggnaywksigakvvatrqtrdlmksdwaeivaftrkglpeypdlplvlpnvvhdgdftlqegkvralyagpahtpdgifvyfpdeqvlygncilkeklgnlsfadvkaypktlerlkalklpiktvigghdsplhgpelidhyealikaaaks	MMKGWMKCGLAGAVVLMASFWGGSVRAAGIELKQVSGPVYVVEDNYYVKENSMVYFGAKGVTVVGATWTPDTARELHKLIKRVSSKPVLEVINTNYHTDRAGGNAYWKSIGAKVVATRQTRDLMKSDWAEIVAFTRKGLPEYPDLPLVLPNVVHDGDFTLQEGKVRAFYAGPAHTPDGIFVYFPDEQVLYGNCILKEKLGNLSFANVKAYPQTIERLKAMKLPIKTVIGGHDSPLHGPELIDHYEELIKAAPQS	1	254	99.6063	0	0	0	254	Cluster_4	ChpA_family_subclass_B2_metallo-beta-lactamase_ImiS_NG_050415.1_cds_WP_063865298.1_1	Cluster_4	SP_Sec_SPI_	27-28	SP_Sec_SPI_	27-28	N_Y_H_T_D	C	H	.	.
B2_105	GCF_006246445.1	656	656	Aeromonas_allosaccharophila	Bacteria-Pseudomonadota-Gammaproteobacteria-Aeromonadales-Aeromonadaceae-Aeromonas-	4533731	NZ_NKWZ01000079.1	class_B2	544	-	12706	13465	12704	13465	ATGAAAAGTTGGATGAAGTGCGGATTGGCCGGGGCCGTGGTGCTGATGGCGAGTTTCTGGGGCGGCAGCGTGCGGGCGGCTGGGATCGAACTCATGCAGGTGAGCGGCCCTGTCTACGTGGTTGAAGATAACTACTACGTAAAGGAAAACTCCATGGTCTATTTCGGGGCCAAGGGGGTGACAGTGGTGGGGGCGACCTGGACGCCGGATACCGCCCGCGAGCTGCACAAGCTGATCAAACGGGTCAGCAGCAAGCCGGTGCTGGAGGTGATCAACACCAACTACCACACCGACCGGGCGGGCGGTAACGCCTACTGGAAGTCCATCGGGGCCAAGGTGGTGGCGACGCGCCAGACCCGGGATCTGATGAAGAGCGACTGGGCCGAGATTGTCGCCTTT…	WP_240038708.1	CphA_family_subclass_B2_metallo-beta-lactamase	MKSWMKCGLAGAVVLMASFWGGSVRAAGIELMQVSGPVYVVEDNYYVKENSMVYFGAKGVTVVGATWTPDTARELHKLIKRVSSKPVLEVINTNYHTDRAGGNAYWKSIGAKVVATRQTRDLMKSDWAEIVAFTRKGLPEYPDLPLVLPNVVHDGDFTLQEGKLRAFYAGPAHTPDGIFVYFPDEQVLYGNCILKEMLGNLSFANVKEYPQTIERLKAMKLPIKTVIGGHDSPLHGPELIDHYEELIKAAPQS	ORF_OK	TRUE_HIT	mmkgwikcglagavvllasfwggsvraagislkqvsgpvyvvednyyvkensmvyfgakgvtvvgatwtpdtarelhklikrvsskpvlevintnyhtdraggnaywksigakvvatrqtrdlmksdwaeivaftrkglpeypdlplvlpnvvhdgdftlqegkvralyagpahtpdgifvyfpdeqvlygncilkeklgnlsfadvkaypktlerlkalklpiktvigghdsplhgpelidhyealikaaaks	IMKSWMKCGLAGAVVLMASFWGGSVRAAGIELMQVSGPVYVVEDNYYVKENSMVYFGAKGVTVVGATWTPDTARELHKLIKRVSSKPVLEVINTNYHTDRAGGNAYWKSIGAKVVATRQTRDLMKSDWAEIVAFTRKGLPEYPDLPLVLPNVVHDGDFTLQEGKLRAFYAGPAHTPDGIFVYFPDEQVLYGNCILKEMLGNLSFANVKEYPQTIERLKAMKLPIKTVIGGHDSPLHGPELIDHYEELIKAAPQS	1	254	99.6063	0	0	0	253	Cluster_4	ChpA_family_subclass_B2_metallo-beta-lactamase_ImiS_NG_050415.1_cds_WP_063865298.1_1	Cluster_4	SP_Sec_SPI_	26-27	SP_Sec_SPI_	26-27	N_Y_H_T_D	C	H	.	.
B2_1050	GCF_963878965.1	2056851	2056851	Aeromonas_sp_HMWF015	Bacteria-Pseudomonadota-Gammaproteobacteria-Aeromonadales-Aeromonadaceae-Aeromonas-unclassified_Aeromonas-	4658495	NZ_CAWNZT010000022.1	class_B2	547.8	+	11139	11898	11137	11901	ATGATGAAAAGTTGGATGAAGTGCGGATTGGCTGGGGCTGTGGTGCTGATGGCGAGTTTCTGGGGTGGCAGCGTGCGGGCCGCGGGGATCTCCCTCAAGCAGGTAAGCGGCCCTGTTTACGTGGTTGAAGATAACTACTACGTAAAGGAAAACTCCATGGTCTATTTCGGGGCCAAGGGGGTGACAGTGGTGGGGGCGACCTGGACGCCGGATACTGCCCGCGAGCTGCACAAGCTGATCAAACGGGTCAGCAGCAAGCCGGTGCTGGAGGTGATCAACACCAACTACCACACCGACCGCGCGGGCGGTAACGCCTACTGGAAGTCCATCGGGGCCAAGGTGGTGGCGACCCGCCAGACCCGGGATCTGATGAAGAGCGACTGGGCCGAGATTGTCGCC…	WP_108611997.1	CphA_family_subclass_B2_metallo-beta-lactamase	MMKSWMKCGLAGAVVLMASFWGGSVRAAGISLKQVSGPVYVVEDNYYVKENSMVYFGAKGVTVVGATWTPDTARELHKLIKRVSSKPVLEVINTNYHTDRAGGNAYWKSIGAKVVATRQTRDLMKSDWAEIVAFTRKGLPEYPDLPLVLPNVVHDGDFKLQDGKVRAFYAGPAHTPDGIFVYFPDEQVLYGNCILKEKLGNLSFANVKAYPQTIERLKAMKLPIKTVIGGHDSPLHGPELIDHYKELIKAAPQS	ORF_OK	TRUE_HIT	mmkgwikcglagavvllasfwggsvraagislkqvsgpvyvvednyyvkensmvyfgakgvtvvgatwtpdtarelhklikrvsskpvlevintnyhtdraggnaywksigakvvatrqtrdlmksdwaeivaftrkglpeypdlplvlpnvvhdgdftlqegkvralyagpahtpdgifvyfpdeqvlygncilkeklgnlsfadvkaypktlerlkalklpiktvigghdsplhgpelidhyealikaaaks	MMKSWMKCGLAGAVVLMASFWGGSVRAAGISLKQVSGPVYVVEDNYYVKENSMVYFGAKGVTVVGATWTPDTARELHKLIKRVSSKPVLEVINTNYHTDRAGGNAYWKSIGAKVVATRQTRDLMKSDWAEIVAFTRKGLPEYPDLPLVLPNVVHDGDFKLQDGKVRAFYAGPAHTPDGIFVYFPDEQVLYGNCILKEKLGNLSFANVKAYPQTIERLKAMKLPIKTVIGGHDSPLHGPELIDHYKELIKAAPQS	1	254	99.6063	0	0	0	254	Cluster_4	ChpA_family_subclass_B2_metallo-beta-lactamase_ImiS_NG_050415.1_cds_WP_063865298.1_1	Cluster_4	SP_Sec_SPI_	27-28	SP_Sec_SPI_	27-28	N_Y_H_T_D	C	H	.	.
B2_1052	GCF_963880855.1	196024	196024	Aeromonas_dhakensis	Bacteria-Pseudomonadota-Gammaproteobacteria-Aeromonadales-Aeromonadaceae-Aeromonas-	4933541	NZ_CAWOIQ010000038.1	class_B2	545.4	+	49574	50333	49575	50336	ATGAAAGGTTGGATAAAGTGCGGATTGGCCGGTGCCCTGGTACTGATGGCGAGTTTCTGGGGTGGCAGCGTGCGGGCGGCAGGGATGTCGCTGACGCAGGTGAGCGGCCCTGTCTATGTGGTGGAGGATAACTACTACGTCAAAGAGAACTCCATGGTCTATTTCGGGGCCAAGGGGGTGACGGTAGTGGGGGCGACCTGGACGCCGGATACCGCCCGCGAGCTGCACAAGCTGATCAAACGGGTCAGCCGCAAGCCGGTGCTGGAAGTGATCAACACCAACTACCACACCGACCGTGCAGGCGGTAACGCCTACTGGAAGTCCATCGGTGCCAAGGTGGTGGCGACCCGTCAGACCCGGGATCTGATGAAGAGCGACTGGGCCGAGATCGTCGCCTTT…	WP_240034267.1	CphA_family_subclass_B2_metallo-beta-lactamase	MKGWIKCGLAGALVLMASFWGGSVRAAGMSLTQVSGPVYVVEDNYYVKENSMVYFGAKGVTVVGATWTPDTARELHKLIKRVSRKPVLEVINTNYHTDRAGGNAYWKSIGAKVVATRQTRDLMKSDWAEIVAFTRKGLPEYPDLPLVLPNVVHDGDFTLQEGKLRAFYAGPAHTPDGIFVYFPDQQVLYGNCILKEKLGNLSFADVKAYPQTLERLKAMKLPIKTVVGGHDSPLHGPELIDHYEALIKAAPQS	ORF_OK	TRUE_HIT	mmkgwikcglagavvllasfwggsvraagislkqvsgpvyvvednyyvkensmvyfgakgvtvvgatwtpdtarelhklikrvsskpvlevintnyhtdraggnaywksigakvvatrqtrdlmksdwaeivaftrkglpeypdlplvlpnvvhdgdftlqegkvralyagpahtpdgifvyfpdeqvlygncilkeklgnlsfadvkaypktlerlkalklpiktvigghdsplhgpelidhyealikaaaks	MMKGWIKCGLAGALVLMASFWGGSVRAAGMSLTQVSGPVYVVEDNYYVKENSMVYFGAKGVTVVGATWTPDTARELHKLIKRVSRKPVLEVINTNYHTDRAGGNAYWKSIGAKVVATRQTRDLMKSDWAEIVAFTRKGLPEYPDLPLVLPNVVHDGDFTLQEGKLRAFYAGPAHTPDGIFVYFPDQQVLYGNCILKEKLGNLSFADVKAYPQTLERLKAMKLPIKTVVGGHDSPLHGPELIDHYEALIKAAPQS	1	254	99.6063	0	0	0	253	Cluster_4	ChpA_family_subclass_B2_metallo-beta-lactamase_ImiS_NG_050415.1_cds_WP_063865298.1_1	Cluster_4	SP_Sec_SPI_	26-27	SP_Sec_SPI_	26-27	N_Y_H_T_D	C	H	.	.
B2_1053	GCF_963880915.1	654	654	Aeromonas_veronii	Bacteria-Pseudomonadota-Gammaproteobacteria-Aeromonadales-Aeromonadaceae-Aeromonas-	4782590	NZ_CAWOGJ010000004.1	class_B2	543.7	+	303107	303866	303105	303869	ATGATGAAAGGTTGGATGAAGTGCGGGTTGGCCGGAGCCGTGGTGCTGATGGCGAGTTTCTGGGGTGGCAGCGTGCGGGCGGCGGGGATCTCCCTCAAGCAGGTGAGCGGCCCGGTCTATGTGGTGGAGGACAACTACTACGTCAAAGAGAACTCCATGGTCTATTTCGGGGCCAAGGGGGTGACGGTGGTGGGGGCGACCTGGACGCCGGATACCGCTCGCGAGCTGCACAAGCTGATCAAACGGGTCAGCAGCAAGCCGGTGCTGGAGGTGATCAACACCAACTACCACACCGATCGGGCGGGCGGTAACGCCTACTGGAAGTCCATCGGGGCCAAGGTGGTGGCGACGCGCCAGACCCGGGATCTGATGAAGAGCGACTGGGCCGAGATTGTCGCC…	WP_127006155.1	CphA_family_subclass_B2_metallo-beta-lactamase	MMKGWMKCGLAGAVVLMASFWGGSVRAAGISLKQVSGPVYVVEDNYYVKENSMVYFGAKGVTVVGATWTPDTARELHKLIKRVSSKPVLEVINTNYHTDRAGGNAYWKSIGAKVVATRQTRDLMKSDWAEIVAFTRKGLPEYPDLPLVLPNVVHDGDFKLQDGKVRAFYAGPAHTPDGIFVYFPDEQVLYGNCILKEKLGNLSFANVKAYPQTIERLKAMKLPIKTVIGGHDSPLHGPELIDHYEELIKAVPQS	ORF_OK	TRUE_HIT	mmkgwikcglagavvllasfwggsvraagislkqvsgpvyvvednyyvkensmvyfgakgvtvvgatwtpdtarelhklikrvsskpvlevintnyhtdraggnaywksigakvvatrqtrdlmksdwaeivaftrkglpeypdlplvlpnvvhdgdftlqegkvralyagpahtpdgifvyfpdeqvlygncilkeklgnlsfadvkaypktlerlkalklpiktvigghdsplhgpelidhyealikaaaks	MMKGWMKCGLAGAVVLMASFWGGSVRAAGISLKQVSGPVYVVEDNYYVKENSMVYFGAKGVTVVGATWTPDTARELHKLIKRVSSKPVLEVINTNYHTDRAGGNAYWKSIGAKVVATRQTRDLMKSDWAEIVAFTRKGLPEYPDLPLVLPNVVHDGDFKLQDGKVRAFYAGPAHTPDGIFVYFPDEQVLYGNCILKEKLGNLSFANVKAYPQTIERLKAMKLPIKTVIGGHDSPLHGPELIDHYEELIKAVPQS	1	254	99.6063	0	0	0	254	Cluster_4	ChpA_family_subclass_B2_metallo-beta-lactamase_ImiS_NG_050415.1_cds_WP_063865298.1_1	Cluster_4	SP_Sec_SPI_	27-28	SP_Sec_SPI_	27-28	N_Y_H_T_D	C	H	.	.
B2_1054	GCF_963881055.1	196024	196024	Aeromonas_dhakensis	Bacteria-Pseudomonadota-Gammaproteobacteria-Aeromonadales-Aeromonadaceae-Aeromonas-	4737819	NZ_CAWOIO010000131.1	class_B2	546.9	+	21614	22373	21612	22376	ATGATGAAAGGTTGGATGAAGTGTGGATTGGCCGGGGCCCTGGTGCTGATGGCGAGTTTCTGGGGCGGCAGCGTGCGGGCGGCGGGGATGTCGCTGACGCAGGTGAGCGGTCCTGTGTATGTGGTGGAGGATAACTACTACGTCAAAGAGAACTCCATGGTCTATTTCGGGGCCAAGGGGGTGACGGTAGTGGGGGCGACCTGGACGCCGGATACCGCCCGCGAACTGCACAAGCTGATCAAACGGGTCAGCCGCAAGCCGGTGCTGGAGGTGATCAACACCAACTACCACACCGACCGGGCGGGCGGTAACGCCTATTGGAAGTCCATCGGGGCCAAGGTGGTATCGACCCGCCAGACCCGGGATCTGATGAAGAGCGACTGGGCCGAGATTGTCGCC…	WP_124250902.1	CphA_family_subclass_B2_metallo-beta-lactamase	MMKGWMKCGLAGALVLMASFWGGSVRAAGMSLTQVSGPVYVVEDNYYVKENSMVYFGAKGVTVVGATWTPDTARELHKLIKRVSRKPVLEVINTNYHTDRAGGNAYWKSIGAKVVSTRQTRDLMKSDWAEIVAFTRKGLPEYPDLPLVLPNVVHDGDFTLQEGKLRAFYAGPAHTPDGIFVYFPDEQVLYGNCILKEKLGNLSFADVKAYPQTIERLKAMKLPIKTVVGGHDSPLHGPELIDHYEELIKAAPQS	ORF_OK	TRUE_HIT	mmkgwikcglagavvllasfwggsvraagislkqvsgpvyvvednyyvkensmvyfgakgvtvvgatwtpdtarelhklikrvsskpvlevintnyhtdraggnaywksigakvvatrqtrdlmksdwaeivaftrkglpeypdlplvlpnvvhdgdftlqegkvralyagpahtpdgifvyfpdeqvlygncilkeklgnlsfadvkaypktlerlkalklpiktvigghdsplhgpelidhyealikaaaks	MMKGWMKCGLAGALVLMASFWGGSVRAAGMSLTQVSGPVYVVEDNYYVKENSMVYFGAKGVTVVGATWTPDTARELHKLIKRVSRKPVLEVINTNYHTDRAGGNAYWKSIGAKVVSTRQTRDLMKSDWAEIVAFTRKGLPEYPDLPLVLPNVVHDGDFTLQEGKLRAFYAGPAHTPDGIFVYFPDEQVLYGNCILKEKLGNLSFADVKAYPQTIERLKAMKLPIKTVVGGHDSPLHGPELIDHYEELIKAAPQS	1	254	99.6063	0	0	0	254	Cluster_4	ChpA_family_subclass_B2_metallo-beta-lactamase_ImiS_NG_050415.1_cds_WP_063865298.1_1	Cluster_4	SP_Sec_SPI_	27-28	SP_Sec_SPI_	27-28	N_Y_H_T_D	C	H	.	.
B2_1055	GCF_963881175.1	654	654	Aeromonas_veronii	Bacteria-Pseudomonadota-Gammaproteobacteria-Aeromonadales-Aeromonadaceae-Aeromonas-	4412039	NZ_CAWOIK010000026.1	class_B2	545.9	+	113	872	126	875	ATGAAGTGCACATTGGCCGGGGCCATGGTGCTGATGGCGAGTTTCTGGGGTGGCAGCGTGCGGGCGGCGGGGATCTCCCTCAAGCAGGTGAGCGGCCCTGTTTACGTGGTTGAAGATAACTACTACGTAAAGGAAAACTCCATGGTCTATTTCGGGGCCAAGGGGGTGACTGTGGTGGGGGCGACCTGGACGCCGGATACCGCCCGCGAGCTGCACAAGCTGATCAAACGGGTCAGCAGCAAGCCGGTGCTGGATGTGATCAACACCAACTACCACACCGATCGGGCGGGCGGTAACGCCTACTGGAAGTCCATCGGGGCCAAGGTGGTGGCGACGCGCCAGACCCGGGATCTGATGAAGAGCGACTGGGCCGAGATTGTCGCCTTTACCCGCAAGGGG…	WP_235666675.1	CphA_family_subclass_B2_metallo-beta-lactamase	MKCTLAGAMVLMASFWGGSVRAAGISLKQVSGPVYVVEDNYYVKENSMVYFGAKGVTVVGATWTPDTARELHKLIKRVSSKPVLDVINTNYHTDRAGGNAYWKSIGAKVVATRQTRDLMKSDWAEIVAFTRKGLPEYPDLPLVLPNVVHDGDFTLQDGKVRAFYAGPAHTPDGIFVYFPDQQVLYGNCILKEKLGNLSFANVKAYPQTIERLKAMKLPIKTVIGGHDSPLHGPELIDHYEELIKAVPQS	ORF_OK	TRUE_HIT	mmkgwikcglagavvllasfwggsvraagislkqvsgpvyvvednyyvkensmvyfgakgvtvvgatwtpdtarelhklikrvsskpvlevintnyhtdraggnaywksigakvvatrqtrdlmksdwaeivaftrkglpeypdlplvlpnvvhdgdftlqegkvralyagpahtpdgifvyfpdeqvlygncilkeklgnlsfadvkaypktlerlkalklpiktvigghdsplhgpelidhyealikaaaks	MMKGWMKCTLAGAMVLMASFWGGSVRAAGISLKQVSGPVYVVEDNYYVKENSMVYFGAKGVTVVGATWTPDTARELHKLIKRVSSKPVLDVINTNYHTDRAGGNAYWKSIGAKVVATRQTRDLMKSDWAEIVAFTRKGLPEYPDLPLVLPNVVHDGDFTLQDGKVRAFYAGPAHTPDGIFVYFPDQQVLYGNCILKEKLGNLSFANVKAYPQTIERLKAMKLPIKTVIGGHDSPLHGPELIDHYEELIKAVPQS	1	254	99.6063	0	0	0	249	Cluster_4	ChpA_family_subclass_B2_metallo-beta-lactamase_ImiS_NG_050415.1_cds_WP_063865298.1_1	Cluster_4	SP_Sec_SPI_	22-23	SP_Sec_SPI_	22-23	N_Y_H_T_D	C	H	.	.
B2_1056	GCF_963881235.1	645	645	Aeromonas_salmonicida	Bacteria-Pseudomonadota-Gammaproteobacteria-Aeromonadales-Aeromonadaceae-Aeromonas-	4804193	NZ_CAWOHB010000010.1	class_B2	540.1	-	11277	12033	11272	12033	ATGAAAGGTTGGATAAAGTGCGGGCTGGCCGGAGCTGTGGTGCTGGTGGCGAGTTTCTGGGGCGGCAGCGTGCATGCGGCGGCGATCTCCCTCACTCAGGTGAGCGGCCCTGTCTATGTGGTAGAGGACAACTACTACGTCAAAGAGAACTCCATGGTCTATTTCGGGGCCAAGGGGGTGACTGTGGTGGGGGCGACCTGGACGCCGGATACCGCCCGCGAGCTGCACAAGCTGATCAAGCGGGTCAGCAACAAGCCTGTGCTGGAGGTGATCAACACCAACTACCACACGGACAGGGCAGGGGGGAACGCCTACTGGAAGTCCATCGGTGCCAAGGTGGTGTCGACCCGCCAGACCTGGGATCTGATGAAGAGCGACTGGGCCGAGATCGTCGCCTTT…	WP_238156140.1	CphA_family_subclass_B2_metallo-beta-lactamase	MKGWIKCGLAGAVVLVASFWGGSVHAAAISLTQVSGPVYVVEDNYYVKENSMVYFGAKGVTVVGATWTPDTARELHKLIKRVSNKPVLEVINTNYHTDRAGGNAYWKSIGAKVVSTRQTWDLMKSDWAEIVAFTRKGLPEYPDLPLVLPNVVHDGDFTLQEGKVRAFYAGPAHTPDGIFVYFPDQQVLYGNCILKEKLGNLSFADVKAYPQTLERLKAMKLPIKIVVGGHDSPLHGPELIDHYETLIKAAPQA	ORF_OK	TRUE_HIT	mmkgwikcglagavvllasfwggsvraagislkqvsgpvyvvednyyvkensmvyfgakgvtvvgatwtpdtarelhklikrvsskpvlevintnyhtdraggnaywksigakvvatrqtrdlmksdwaeivaftrkglpeypdlplvlpnvvhdgdftlqegkvralyagpahtpdgifvyfpdeqvlygncilkeklgnlsfadvkaypktlerlkalklpiktvigghdsplhgpelidhyealikaaak	MMKGWIKCGLAGAVVLVASFWGGSVHAAAISLTQVSGPVYVVEDNYYVKENSMVYFGAKGVTVVGATWTPDTARELHKLIKRVSNKPVLEVINTNYHTDRAGGNAYWKSIGAKVVSTRQTWDLMKSDWAEIVAFTRKGLPEYPDLPLVLPNVVHDGDFTLQEGKVRAFYAGPAHTPDGIFVYFPDQQVLYGNCILKEKLGNLSFADVKAYPQTLERLKAMKLPIKIVVGGHDSPLHGPELIDHYETLIKAAPQ	1	253	99.2126	0	0	0	253	Cluster_4	ChpA_family_subclass_B2_metallo-beta-lactamase_ImiS_NG_050415.1_cds_WP_063865298.1_1	Cluster_4	SP_Sec_SPI_	26-27	SP_Sec_SPI_	26-27	N_Y_H_T_D	C	H	.	.
B2_1057	GCF_963881385.1	645	645	Aeromonas_salmonicida	Bacteria-Pseudomonadota-Gammaproteobacteria-Aeromonadales-Aeromonadaceae-Aeromonas-	4974499	NZ_CAWOII010000023.1	class_B2	532.2	-	11113	11869	11108	11869	ATGAAAGGTTGGATAAAGTACGGGCTGGCCGGGGCCCTGGTGCTGGTGGCGAGTTTCTGGGGCGGCAGCGTGCATGCGGCGGCGATCTCCCTCACTCAGGTGAGCGGCCCCGTGTATGTCGTAGAGGATAACTACTACGTCAAAGAGAACTCCATGGTCTATTTCGGGGCCAAGGGGGTGACTGTGGTGGGGGCGACCTGGACGCCTGATACCGCCCGCGAGCTGCACAAGCTGATCAAACGGGTCAGCAACAAGCCTGTGCTGGAGGTGATCAACACCAACTACCACACGGACAGGGCAGGGGGGAACGCCTACTGGAAGTCCATCGGTGCCAAGGTGGTATCGACCCGCCAGACCCGGGATCTGATGAAGAGCGATTGGGCCGAGATCGTCGCCTTT…	WP_238155191.1	CphA_family_subclass_B2_metallo-beta-lactamase	MKGWIKYGLAGALVLVASFWGGSVHAAAISLTQVSGPVYVVEDNYYVKENSMVYFGAKGVTVVGATWTPDTARELHKLIKRVSNKPVLEVINTNYHTDRAGGNAYWKSIGAKVVSTRQTRDLMKSDWAEIVAFTRKGLPEYPDLPLVLPNVVHDGDFTLQEGKVRAFYLGPAHTPDGIFVYFPDQQVLYGNCILKETLGNLSFADVKAYPQTLERLRAMKLPIKIVVGGHDSPLHGPELIDHYQSLIKAAPQA	ORF_OK	TRUE_HIT	mmkgwikcglagavvllasfwggsvraagislkqvsgpvyvvednyyvkensmvyfgakgvtvvgatwtpdtarelhklikrvsskpvlevintnyhtdraggnaywksigakvvatrqtrdlmksdwaeivaftrkglpeypdlplvlpnvvhdgdftlqegkvralyagpahtpdgifvyfpdeqvlygncilkeklgnlsfadvkaypktlerlkalklpiktvigghdsplhgpelidhyealikaaak	MMKGWIKYGLAGALVLVASFWGGSVHAAAISLTQVSGPVYVVEDNYYVKENSMVYFGAKGVTVVGATWTPDTARELHKLIKRVSNKPVLEVINTNYHTDRAGGNAYWKSIGAKVVSTRQTRDLMKSDWAEIVAFTRKGLPEYPDLPLVLPNVVHDGDFTLQEGKVRAFYLGPAHTPDGIFVYFPDQQVLYGNCILKETLGNLSFADVKAYPQTLERLRAMKLPIKIVVGGHDSPLHGPELIDHYQSLIKAAPQ	1	253	99.2126	0	0	0	253	Cluster_4	ChpA_family_subclass_B2_metallo-beta-lactamase_ImiS_NG_050415.1_cds_WP_063865298.1_1	Cluster_4	SP_Sec_SPI_	26-27	SP_Sec_SPI_	26-27	N_Y_H_T_D	C	H	.	.
B2_1058	GCF_963882465.1	645	645	Aeromonas_salmonicida	Bacteria-Pseudomonadota-Gammaproteobacteria-Aeromonadales-Aeromonadaceae-Aeromonas-	4803087	NZ_CAWOOA010000113.1	class_B2	533.7	+	125	878	123	884	ATGAAAGGTTGGATAAAGTGCGGGCTGGCCGGAGCTGTGGTGCTGGTGGCGAGTTTCTGGGGCGGCAGCGTGCATGCGGCGGCGATCTCCCTCACTCAGGTGAGCGGCCCCGTGTATGTCGTAGAGGACAACTACTACGTCAAAGAGAACTCCATGGTCTATTTCGGGGCCAAGGGGGTGACGGTAGTGGGGGCGACCTGGACGCCGGATACCGCCCGTGAGCTGCACAAGCTGATCAAACGGGTCAGCAACAAGCCTGTGCTGGAGGTGATCAACACCAACTACCACACGGACAGGGCAGGGGGTAACTCCTACTGGAAGTCCATCGGTGCCAAGGTGGTATCGACCCGCCAGACCCGGGAGCTGATGAAGAGCGATTGGGCCGAGATCGTCGCCTTT…	WP_021141010.1	CphA_family_subclass_B2_metallo-beta-lactamase	MKGWIKCGLAGAVVLVASFWGGSVHAAAISLTQVSGPVYVVEDNYYVKENSMVYFGAKGVTVVGATWTPDTARELHKLIKRVSNKPVLEVINTNYHTDRAGGNSYWKSIGAKVVSTRQTRELMKSDWAEIVAFTRKGLPEYPDLPLVLPNVVYDGDFSLQEDKVRAFYAGPAHTPDGIFVYFPDEQVLYGNCILKEKLGNLSFADVKAYPQTLERLKAMKLPIKIVVGGHDSPLHGPELIDHYETLIKAAPQA	ORF_OK	TRUE_HIT	mkgwikcglagavvllasfwggsvraagislkqvsgpvyvvednyyvkensmvyfgakgvtvvgatwtpdtarelhklikrvsskpvlevintnyhtdraggnaywksigakvvatrqtrdlmksdwaeivaftrkglpeypdlplvlpnvvhdgdftlqegkvralyagpahtpdgifvyfpdeqvlygncilkeklgnlsfadvkaypktlerlkalklpiktvigghdsplhgpelidhyealikaaak	MKGWIKCGLAGAVVLVASFWGGSVHAAAISLTQVSGPVYVVEDNYYVKENSMVYFGAKGVTVVGATWTPDTARELHKLIKRVSNKPVLEVINTNYHTDRAGGNSYWKSIGAKVVSTRQTRELMKSDWAEIVAFTRKGLPEYPDLPLVLPNVVYDGDFSLQEDKVRAFYAGPAHTPDGIFVYFPDEQVLYGNCILKEKLGNLSFADVKAYPQTLERLKAMKLPIKIVVGGHDSPLHGPELIDHYETLIKAAPQ	2	253	98.8189	0	0	0	253	Cluster_4	ChpA_family_subclass_B2_metallo-beta-lactamase_ImiS_NG_050415.1_cds_WP_063865298.1_1	Cluster_4	SP_Sec_SPI_	26-27	SP_Sec_SPI_	26-27	N_Y_H_T_D	C	H	.	.
B2_1059	GCF_963882925.1	654	654	Aeromonas_veronii	Bacteria-Pseudomonadota-Gammaproteobacteria-Aeromonadales-Aeromonadaceae-Aeromonas-	4414981	NZ_CAWONC010000010.1	class_B2	545.1	-	12280	13039	12278	13042	ATGATGAAAGGTTGGATGAAGTGCACATTGGCCGGAGCCGTGGTGCTGATGGCGAGTTTCTGGGGTGGCAGCGTGCGGGCGGCGGGGATCGAGCTCAAGCAGGTGAGCGGCCCTGTCTATGTGGTGGAGGACAACTACTACGTCAAAGAGAACTCCATGGTCTATTTCGGGGCCAAGGGGGTGACGGTGGTGGGGGCGACCTGGACGCCGGATACCGCCCGCGAGCTGCACAAGCTGATCAAACGGGTCAGCAGCAAGCCGGTGCTGGAGGTGATCAACACCAACTACCACACCGATCGGGCGGGCGGTAACGCCTACTGGAAGTCCATTGGGGCCAAGGTGGTGGCGACGCGCCAGACCCGGGATCTGATGAAGAGCGACTGGGCCGAGATTGTCGCC…	WP_082187683.1	CphA_family_subclass_B2_metallo-beta-lactamase	MMKGWMKCTLAGAVVLMASFWGGSVRAAGIELKQVSGPVYVVEDNYYVKENSMVYFGAKGVTVVGATWTPDTARELHKLIKRVSSKPVLEVINTNYHTDRAGGNAYWKSIGAKVVATRQTRDLMKSDWAEIVAFTRKGLPEYPDLPLVLPNVVHDGDFTLQEGKVRAFYAGPAHTPDGIFVYFPDEQVLYGNCILKEKLGNLSFANVKAYPQTIERLKAMKLPIKTVIGGHDSPLHGPELIDHYEELIKAVPQS	ORF_OK	TRUE_HIT	mmkgwikcglagavvllasfwggsvraagislkqvsgpvyvvednyyvkensmvyfgakgvtvvgatwtpdtarelhklikrvsskpvlevintnyhtdraggnaywksigakvvatrqtrdlmksdwaeivaftrkglpeypdlplvlpnvvhdgdftlqegkvralyagpahtpdgifvyfpdeqvlygncilkeklgnlsfadvkaypktlerlkalklpiktvigghdsplhgpelidhyealikaaaks	MMKGWMKCTLAGAVVLMASFWGGSVRAAGIELKQVSGPVYVVEDNYYVKENSMVYFGAKGVTVVGATWTPDTARELHKLIKRVSSKPVLEVINTNYHTDRAGGNAYWKSIGAKVVATRQTRDLMKSDWAEIVAFTRKGLPEYPDLPLVLPNVVHDGDFTLQEGKVRAFYAGPAHTPDGIFVYFPDEQVLYGNCILKEKLGNLSFANVKAYPQTIERLKAMKLPIKTVIGGHDSPLHGPELIDHYEELIKAVPQS	1	254	99.6063	0	0	0	254	Cluster_4	ChpA_family_subclass_B2_metallo-beta-lactamase_ImiS_NG_050415.1_cds_WP_063865298.1_1	Cluster_4	SP_Sec_SPI_	27-28	SP_Sec_SPI_	27-28	N_Y_H_T_D	C	H	.	.
B2_106	GCF_006246455.1	644	644	Aeromonas_hydrophila	Bacteria-Pseudomonadota-Gammaproteobacteria-Aeromonadales-Aeromonadaceae-Aeromonas-	4929129	NZ_NKXB01000025.1	class_B2	544.8	-	13889	14648	13887	14651	ATGATGAAAGGTTGGATGAAGTGCGGGCTGGCCGGGGCTGTGGTGCTGATGGCGAGTTTCTGGGGTGGCAGCGTGCGGGCGGCGGGGATGTCGCTGACGCAGGTGAGCGGCCCTGTCTATGTTGTTGAAGATAACTACTACGTGCAGGAAAACTCCATGGTCTATTTCGGGGCCGAGGGGGTGACGGTGGTGGGGGCGACCTGGACGCCGGATACGGCCCGCGAGCTGCACAAGCTGATCAAACGGGTCAGTCGCAAGCCGGTGCTGGAGGTGATCAACACCAACTACCATACCGACCGGGCAGGCGGTAACGCCTACTGGAAGTCCATCGGGGCCAAGGTGGTGGCGACGCGCCAGACCCGGGATCTGATGAAGAGCGACTGGGCCGAGATCGTCGCC…	WP_139393112.1	CphA_family_subclass_B2_metallo-beta-lactamase	MMKGWMKCGLAGAVVLMASFWGGSVRAAGMSLTQVSGPVYVVEDNYYVQENSMVYFGAEGVTVVGATWTPDTARELHKLIKRVSRKPVLEVINTNYHTDRAGGNAYWKSIGAKVVATRQTRDLMKSDWAEIVAFTRKGLPEYPDLPLVLPNVVHDGDFTLQEGKLRAFYAGPAHTPDGIFVYFPDQQVLYGNCILKEKLGNLSFADVKAYPQTLERLKAMKLPIKTVVGGHDSPLHGPELIDHYEALIKAAPQS	ORF_OK	TRUE_HIT	mmkgwikcglagavvllasfwggsvraagislkqvsgpvyvvednyyvkensmvyfgakgvtvvgatwtpdtarelhklikrvsskpvlevintnyhtdraggnaywksigakvvatrqtrdlmksdwaeivaftrkglpeypdlplvlpnvvhdgdftlqegkvralyagpahtpdgifvyfpdeqvlygncilkeklgnlsfadvkaypktlerlkalklpiktvigghdsplhgpelidhyealikaaaks	MMKGWMKCGLAGAVVLMASFWGGSVRAAGMSLTQVSGPVYVVEDNYYVQENSMVYFGAEGVTVVGATWTPDTARELHKLIKRVSRKPVLEVINTNYHTDRAGGNAYWKSIGAKVVATRQTRDLMKSDWAEIVAFTRKGLPEYPDLPLVLPNVVHDGDFTLQEGKLRAFYAGPAHTPDGIFVYFPDQQVLYGNCILKEKLGNLSFADVKAYPQTLERLKAMKLPIKTVVGGHDSPLHGPELIDHYEALIKAAPQS	1	254	99.6063	0	0	0	254	Cluster_4	ChpA_family_subclass_B2_metallo-beta-lactamase_ImiS_NG_050415.1_cds_WP_063865298.1_1	Cluster_4	SP_Sec_SPI_	27-28	SP_Sec_SPI_	27-28	N_Y_H_T_D	C	H	.	.
B2_1060	GCF_963882945.1	196024	196024	Aeromonas_dhakensis	Bacteria-Pseudomonadota-Gammaproteobacteria-Aeromonadales-Aeromonadaceae-Aeromonas-	4804366	NZ_CAWOOM010000023.1	class_B2	536.5	-	12089	12848	12087	12848	ATGAAAGGTTGGATAAAGTGCGGATTGGCCGGAGCCGTGGTGCTGATGGCGAGTTTCTGGGGTGGCAGCGTGCGTGCGGCGGGGATGTCGCTGACGCAGGTGAGCGGCCCTGTCTATGTGGTGGAGGACAACTACTACGTCAAAGAGAACTCCATGGTCTATTTCGGGGCCAGGGGGGTGACTGTGGTGGGGGCAACCTGGACGCCGGATACCGCCCGCGAGCTGCACAAGCTGATCAAACGGGTCAGCCGCAAGCCGGTGCTGGAGGTGATCAACACCAACTACCACACCGACCGTGCCGGCGGTAACGCCTACTGGAAGTCCATCGGGGCCAAGGTGGTGGCGACGCGCCAGACCCGGGATCTGATGAAGAGCGACTGGGCCGAGATTGTCGCCTTT…	WP_240035829.1	CphA_family_subclass_B2_metallo-beta-lactamase	MKGWIKCGLAGAVVLMASFWGGSVRAAGMSLTQVSGPVYVVEDNYYVKENSMVYFGARGVTVVGATWTPDTARELHKLIKRVSRKPVLEVINTNYHTDRAGGNAYWKSIGAKVVATRQTRDLMKSDWAEIVAFTRKGLPEYPDLPLVLPNVVHEGYFTLQEGKLRAFYAGPAHTPDGIFVYFPDEQVLYGNCILKEKLGNLSFADVKAYPQTLERLKAMKLPIKTVVGGHDSPLHGPELIDHYEALIKAVPQS	ORF_OK	TRUE_HIT	mmkgwikcglagavvllasfwggsvraagislkqvsgpvyvvednyyvkensmvyfgakgvtvvgatwtpdtarelhklikrvsskpvlevintnyhtdraggnaywksigakvvatrqtrdlmksdwaeivaftrkglpeypdlplvlpnvvhdgdftlqegkvralyagpahtpdgifvyfpdeqvlygncilkeklgnlsfadvkaypktlerlkalklpiktvigghdsplhgpelidhyealikaaaks	MMKGWIKCGLAGAVVLMASFWGGSVRAAGMSLTQVSGPVYVVEDNYYVKENSMVYFGARGVTVVGATWTPDTARELHKLIKRVSRKPVLEVINTNYHTDRAGGNAYWKSIGAKVVATRQTRDLMKSDWAEIVAFTRKGLPEYPDLPLVLPNVVHEGYFTLQEGKLRAFYAGPAHTPDGIFVYFPDEQVLYGNCILKEKLGNLSFADVKAYPQTLERLKAMKLPIKTVVGGHDSPLHGPELIDHYEALIKAVPQS	1	254	99.6063	0	0	0	253	Cluster_4	ChpA_family_subclass_B2_metallo-beta-lactamase_ImiS_NG_050415.1_cds_WP_063865298.1_1	Cluster_4	SP_Sec_SPI_	26-27	SP_Sec_SPI_	26-27	N_Y_H_T_D	C	H	.	.
B2_1061	GCF_963882965.1	654	654	Aeromonas_veronii	Bacteria-Pseudomonadota-Gammaproteobacteria-Aeromonadales-Aeromonadaceae-Aeromonas-	4926283	NZ_CAWONV010000006.1	class_B2	544.3	-	12543	13302	12541	13305	ATGATGAAAGGTTGGATGAAGTGTGGATTGGCCGGGGCCGTGGTGCTGATGGCGAGTTTCTGGGGCGGCAGCGTGCGGGCGGCGGGGATCGAGCTCAAGCAGGTGAGTGGCCCTGTCTATGTTGTTGAAGATAACTACTACGTAAAGGAAAACTCCATGGTCTATTTCGGGGCCAAGGGGGTGACTGTGGTGGGGGCGACCTGGACGCCGGATACCGCCCGCGAGCTGCACAAGCTGATAAAAAGAGTCAGCAGCAAGCCGGTGCTGGAGGTGATCAACACCAACTACCACACCGACCGGGCGGGCGGTAACGCCTACTGGAAGTCCATCGGGGCCAAGGTGGTGGCGACGCGCCAGACCCGGGATCTGATGAAGAGCGACTGGGCCGAGATTGTCGCC…	WP_139401124.1	CphA_family_subclass_B2_metallo-beta-lactamase	MMKGWMKCGLAGAVVLMASFWGGSVRAAGIELKQVSGPVYVVEDNYYVKENSMVYFGAKGVTVVGATWTPDTARELHKLIKRVSSKPVLEVINTNYHTDRAGGNAYWKSIGAKVVATRQTRDLMKSDWAEIVAFTRKGLPEYPDLPLVLPNVVHDGDFTLQDGKVRAFYAGPAHTPDGIFVYFPDEQVLYGNCILKEKLGNLSFANVKAYPQTIERLKAMKLPIKTVIGGHDSPLHGPELIDHYEELIKAVPQS	ORF_OK	TRUE_HIT	mmkgwikcglagavvllasfwggsvraagislkqvsgpvyvvednyyvkensmvyfgakgvtvvgatwtpdtarelhklikrvsskpvlevintnyhtdraggnaywksigakvvatrqtrdlmksdwaeivaftrkglpeypdlplvlpnvvhdgdftlqegkvralyagpahtpdgifvyfpdeqvlygncilkeklgnlsfadvkaypktlerlkalklpiktvigghdsplhgpelidhyealikaaaks	MMKGWMKCGLAGAVVLMASFWGGSVRAAGIELKQVSGPVYVVEDNYYVKENSMVYFGAKGVTVVGATWTPDTARELHKLIKRVSSKPVLEVINTNYHTDRAGGNAYWKSIGAKVVATRQTRDLMKSDWAEIVAFTRKGLPEYPDLPLVLPNVVHDGDFTLQDGKVRAFYAGPAHTPDGIFVYFPDEQVLYGNCILKEKLGNLSFANVKAYPQTIERLKAMKLPIKTVIGGHDSPLHGPELIDHYEELIKAVPQS	1	254	99.6063	0	0	0	254	Cluster_4	ChpA_family_subclass_B2_metallo-beta-lactamase_ImiS_NG_050415.1_cds_WP_063865298.1_1	Cluster_4	SP_Sec_SPI_	27-28	SP_Sec_SPI_	27-28	N_Y_H_T_D	C	H	.	.
B2_1062	GCF_963882995.1	646	646	Aeromonas_sobria	Bacteria-Pseudomonadota-Gammaproteobacteria-Aeromonadales-Aeromonadaceae-Aeromonas-	4637031	NZ_CAWOPE010000068.1	class_B2	357.1	+	25114	25612	25082	25615	ATGGTCTATTTCGGGGCCAAGGGAGTGACGGTGCTGGAGGTGATCAACACCAACTACCACACCGACAGGGCGGGGGGTAATGCCTACTGGAAGTCCATCGGTGCCAAGGTGGTGGCGACGCGCCAGACCCGGGATCTGATGAAGAGCGACTGGGCCGAGATTGTCGCCTTTACCCGCAAGGGGCTGCCGGAGTACCCGGAGTTGCCGCTGGTGCTGCCCAACGTGGTGCACGATGGTGACTTCACCCTGCAAGAGGGCAAGGTGCGTGCCTTCTACACAGGCCCGGCCCATACGCCGGACGGCATCTTTGTCTACTTCCCCGACCAGCAGGTGCTCTATGGCAACTGCATCCTCAAGGAGAAGCTGGGCAACCTGAGCTTTGCCAATGTGAAGGCCTAT…	WP_241658252.1	subclass_B2_metallo-beta-lactamase	MVYFGAKGVTVLEVINTNYHTDRAGGNAYWKSIGAKVVATRQTRDLMKSDWAEIVAFTRKGLPEYPELPLVLPNVVHDGDFTLQEGKVRAFYTGPAHTPDGIFVYFPDQQVLYGNCILKEKLGNLSFANVKAYPQTLERLKAMKLPIKTVIGGHDSPLHGPELIDHYEELIKAAPQS	ORF_OK	TRUE_HIT	vlevintnyhtdraggnaywksigakvvatrqtrdlmksdwaeivaftrkglpeypdlplvlpnvvhdgdftlqegkvralyagpahtpdgifvyfpdeqvlygncilkeklgnlsfadvkaypktlerlkalklpiktvigghdsplhgpelidhyealikaaaks	VLEVINTNYHTDRAGGNAYWKSIGAKVVATRQTRDLMKSDWAEIVAFTRKGLPEYPELPLVLPNVVHDGDFTLQEGKVRAFYTGPAHTPDGIFVYFPDQQVLYGNCILKEKLGNLSFANVKAYPQTLERLKAMKLPIKTVIGGHDSPLHGPELIDHYEELIKAAPQS	88	254	65.3543	0	0	0	177	Cluster_17	CLUSTER_NOT_IN_NCBI_AMR_REF_DB	Cluster_16	OTHER	0	OTHER	0	N_Y_H_T_D	C	H	.	.
B2_1063	GCF_963883005.1	654	654	Aeromonas_veronii	Bacteria-Pseudomonadota-Gammaproteobacteria-Aeromonadales-Aeromonadaceae-Aeromonas-	4639561	NZ_CAWOON010000033.1	class_B2	550.7	-	9422	10178	9417	10181	ATGATGAAAGGTTGGATGAAGTGCACATTGGCCGGGGCCGTGGTGCTGATGGCGAGTTTCTGGGGTGGCAGCGTGCGGGCGGCGGGGATCTCCCTTAAGCAGGTGAGCGGCCCTGTTTACGTGGTTGAAGATAACTACTACGTAAAGGAAAACTCCATGGTCTATTTCGGGGCCAAGGGGGTGACGGTGGTGGGGGCGACCTGGACGCCGGATACCGCCCGCGAGCTGCACAAGCTGATCAAACGGGTCAGCAGCAAGCCGGTGCTGGAGGTGATCAACACCAACTACCACACCGATCGGGCGGGCGGTAACGCCTACTGGAAGTCCATCGGGGCCAAGGTGGTGGCGACGCGCCAGACCCGGGATCTGATGAAGAGCGACTGGGCCGAGATTGTCGCC…	WP_139730582.1	CphA_family_subclass_B2_metallo-beta-lactamase	MMKGWMKCTLAGAVVLMASFWGGSVRAAGISLKQVSGPVYVVEDNYYVKENSMVYFGAKGVTVVGATWTPDTARELHKLIKRVSSKPVLEVINTNYHTDRAGGNAYWKSIGAKVVATRQTRDLMKSDWAEIVAFTRKGLPEYPDLPLVLPNVVHDGDFTLQEGKVRAFYAGPAHTPDGIFVYFPDEQVLYGNCILKEKLGNLSFANVKAYPQTIERLKAMKLPIKTVIGGHDSPLHGPELIDHYEELIKAAPQP	ORF_OK	TRUE_HIT	mmkgwikcglagavvllasfwggsvraagislkqvsgpvyvvednyyvkensmvyfgakgvtvvgatwtpdtarelhklikrvsskpvlevintnyhtdraggnaywksigakvvatrqtrdlmksdwaeivaftrkglpeypdlplvlpnvvhdgdftlqegkvralyagpahtpdgifvyfpdeqvlygncilkeklgnlsfadvkaypktlerlkalklpiktvigghdsplhgpelidhyealikaaak	MMKGWMKCTLAGAVVLMASFWGGSVRAAGISLKQVSGPVYVVEDNYYVKENSMVYFGAKGVTVVGATWTPDTARELHKLIKRVSSKPVLEVINTNYHTDRAGGNAYWKSIGAKVVATRQTRDLMKSDWAEIVAFTRKGLPEYPDLPLVLPNVVHDGDFTLQEGKVRAFYAGPAHTPDGIFVYFPDEQVLYGNCILKEKLGNLSFANVKAYPQTIERLKAMKLPIKTVIGGHDSPLHGPELIDHYEELIKAAPQ	1	253	99.2126	0	0	0	254	Cluster_4	ChpA_family_subclass_B2_metallo-beta-lactamase_ImiS_NG_050415.1_cds_WP_063865298.1_1	Cluster_4	SP_Sec_SPI_	27-28	SP_Sec_SPI_	27-28	N_Y_H_T_D	C	H	.	.
B2_1064	GCF_963883035.1	656	656	Aeromonas_allosaccharophila	Bacteria-Pseudomonadota-Gammaproteobacteria-Aeromonadales-Aeromonadaceae-Aeromonas-	4533731	NZ_CAWOOK010000082.1	class_B2	544	-	12706	13465	12704	13465	ATGAAAAGTTGGATGAAGTGCGGATTGGCCGGGGCCGTGGTGCTGATGGCGAGTTTCTGGGGCGGCAGCGTGCGGGCGGCTGGGATCGAACTCATGCAGGTGAGCGGCCCTGTCTACGTGGTTGAAGATAACTACTACGTAAAGGAAAACTCCATGGTCTATTTCGGGGCCAAGGGGGTGACAGTGGTGGGGGCGACCTGGACGCCGGATACCGCCCGCGAGCTGCACAAGCTGATCAAACGGGTCAGCAGCAAGCCGGTGCTGGAGGTGATCAACACCAACTACCACACCGACCGGGCGGGCGGTAACGCCTACTGGAAGTCCATCGGGGCCAAGGTGGTGGCGACGCGCCAGACCCGGGATCTGATGAAGAGCGACTGGGCCGAGATTGTCGCCTTT…	WP_240038708.1	CphA_family_subclass_B2_metallo-beta-lactamase	MKSWMKCGLAGAVVLMASFWGGSVRAAGIELMQVSGPVYVVEDNYYVKENSMVYFGAKGVTVVGATWTPDTARELHKLIKRVSSKPVLEVINTNYHTDRAGGNAYWKSIGAKVVATRQTRDLMKSDWAEIVAFTRKGLPEYPDLPLVLPNVVHDGDFTLQEGKLRAFYAGPAHTPDGIFVYFPDEQVLYGNCILKEMLGNLSFANVKEYPQTIERLKAMKLPIKTVIGGHDSPLHGPELIDHYEELIKAAPQS	ORF_OK	TRUE_HIT	mmkgwikcglagavvllasfwggsvraagislkqvsgpvyvvednyyvkensmvyfgakgvtvvgatwtpdtarelhklikrvsskpvlevintnyhtdraggnaywksigakvvatrqtrdlmksdwaeivaftrkglpeypdlplvlpnvvhdgdftlqegkvralyagpahtpdgifvyfpdeqvlygncilkeklgnlsfadvkaypktlerlkalklpiktvigghdsplhgpelidhyealikaaaks	IMKSWMKCGLAGAVVLMASFWGGSVRAAGIELMQVSGPVYVVEDNYYVKENSMVYFGAKGVTVVGATWTPDTARELHKLIKRVSSKPVLEVINTNYHTDRAGGNAYWKSIGAKVVATRQTRDLMKSDWAEIVAFTRKGLPEYPDLPLVLPNVVHDGDFTLQEGKLRAFYAGPAHTPDGIFVYFPDEQVLYGNCILKEMLGNLSFANVKEYPQTIERLKAMKLPIKTVIGGHDSPLHGPELIDHYEELIKAAPQS	1	254	99.6063	0	0	0	253	Cluster_4	ChpA_family_subclass_B2_metallo-beta-lactamase_ImiS_NG_050415.1_cds_WP_063865298.1_1	Cluster_4	SP_Sec_SPI_	26-27	SP_Sec_SPI_	26-27	N_Y_H_T_D	C	H	.	.
B2_1065	GCF_963883045.1	654	654	Aeromonas_veronii	Bacteria-Pseudomonadota-Gammaproteobacteria-Aeromonadales-Aeromonadaceae-Aeromonas-	4404545	NZ_CAWOOB010000048.1	class_B2	546.3	-	12814	13573	12812	13561	ATGAAGTGCACATTGGCCGGGGCCGTGGTGCTGATGGCGAGTTTCTGGGGCGGCAGCGTGCGGGCGGCGGGGATCTCCCTCAAACAGGTGAGCGGCCCTGTCTATGTGGTGGAGGACAACTACTACGTCAAAGAGAACTCCATGGTCTATTTCGGGGCCAAGGGGGTGACGGTGGTGGGGGCGACCTGGACGCCGGATACCGCCCGCGAGCTGCACAAGCTCATTAAACGGGTCAGCAGCAAGCCGGTGCTGGAGGTGATCAACACCAACTACCACACCGACCGGGCGGGTGGTAACGCCTACTGGAAGTCCATCGGGGCCAAGGTGGTGGCGACCCGCCAGACCCGGGATTTGATGAAGAGCGACTGGGCCGAGATTGTCGCCTTTACCCGCAAGGGG…	WP_236761073.1	CphA_family_subclass_B2_metallo-beta-lactamase	MKCTLAGAVVLMASFWGGSVRAAGISLKQVSGPVYVVEDNYYVKENSMVYFGAKGVTVVGATWTPDTARELHKLIKRVSSKPVLEVINTNYHTDRAGGNAYWKSIGAKVVATRQTRDLMKSDWAEIVAFTRKGLPEYPDLPLVLPNVVHDGDFTLQEGKLRAFYAGPAHTPDGIFVYFPDEQVLYGNCILKEKLGNLSFANVKEYPQTIERLKAMKLPIKTVIGGHDSPLHGPELIDHYEELIKAVPQS	ORF_OK	TRUE_HIT	mmkgwikcglagavvllasfwggsvraagislkqvsgpvyvvednyyvkensmvyfgakgvtvvgatwtpdtarelhklikrvsskpvlevintnyhtdraggnaywksigakvvatrqtrdlmksdwaeivaftrkglpeypdlplvlpnvvhdgdftlqegkvralyagpahtpdgifvyfpdeqvlygncilkeklgnlsfadvkaypktlerlkalklpiktvigghdsplhgpelidhyealikaaaks	MMKSWMKCTLAGAVVLMASFWGGSVRAAGISLKQVSGPVYVVEDNYYVKENSMVYFGAKGVTVVGATWTPDTARELHKLIKRVSSKPVLEVINTNYHTDRAGGNAYWKSIGAKVVATRQTRDLMKSDWAEIVAFTRKGLPEYPDLPLVLPNVVHDGDFTLQEGKLRAFYAGPAHTPDGIFVYFPDEQVLYGNCILKEKLGNLSFANVKEYPQTIERLKAMKLPIKTVIGGHDSPLHGPELIDHYEELIKAVPQS	1	254	99.6063	0	0	0	249	Cluster_4	ChpA_family_subclass_B2_metallo-beta-lactamase_ImiS_NG_050415.1_cds_WP_063865298.1_1	Cluster_4	SP_Sec_SPI_	22-23	SP_Sec_SPI_	22-23	N_Y_H_T_D	C	H	.	.
B2_1066	GCF_963883125.1	654	654	Aeromonas_veronii	Bacteria-Pseudomonadota-Gammaproteobacteria-Aeromonadales-Aeromonadaceae-Aeromonas-	4514386	NZ_CAWONR010000022.1	class_B2	544.9	-	12448	13207	12446	13210	ATGATGAAAGGTTGGATGAAGTGTGGATTGGCCGGGGCTGTGGTGCTGATGGCGAGTTTCTGGGGTGGCAGCGTGCGGGCGGCGGGGATCGAACTCAAGCAGGTGAGCGGCCCTGTCTATGTGGTGGAGGACAACTACTACGTCAAAGAGAACTCCATGGTCTATTTCGGGGCCAAGGGGGTGACTGTGGTGGGGGCGACCTGGACGCCGGATACCGCCCGCGAGCTGCACAAGCTGATCAAACGGGTCAGCAGCAAGCCGGTGCTGGAGGTGATCAACACCAACTATCACACCGATCGGGCGGGTGGTAACGCCTACTGGAAGTCCATCGGGGCCAAGGTGGTGGCGACGCGCCAGACCCGGGATCTGATGAAGAGCGACTGGGCCGAGATTGTCGCC…	WP_139432248.1	CphA_family_subclass_B2_metallo-beta-lactamase	MMKGWMKCGLAGAVVLMASFWGGSVRAAGIELKQVSGPVYVVEDNYYVKENSMVYFGAKGVTVVGATWTPDTARELHKLIKRVSSKPVLEVINTNYHTDRAGGNAYWKSIGAKVVATRQTRDLMKSDWAEIVAFTRKGLPEYPDLPLVLPNVVHDGDFTLQEGKVRAFYAGPAHTPDGIFVYFPDEQVLYGNCILKEKLGNLSFANVKAYPQTIERLKAMKLPIKTVIGGHDSPLHGPELIDHYEELIKAVPQS	ORF_OK	TRUE_HIT	mmkgwikcglagavvllasfwggsvraagislkqvsgpvyvvednyyvkensmvyfgakgvtvvgatwtpdtarelhklikrvsskpvlevintnyhtdraggnaywksigakvvatrqtrdlmksdwaeivaftrkglpeypdlplvlpnvvhdgdftlqegkvralyagpahtpdgifvyfpdeqvlygncilkeklgnlsfadvkaypktlerlkalklpiktvigghdsplhgpelidhyealikaaaks	MMKGWMKCGLAGAVVLMASFWGGSVRAAGIELKQVSGPVYVVEDNYYVKENSMVYFGAKGVTVVGATWTPDTARELHKLIKRVSSKPVLEVINTNYHTDRAGGNAYWKSIGAKVVATRQTRDLMKSDWAEIVAFTRKGLPEYPDLPLVLPNVVHDGDFTLQEGKVRAFYAGPAHTPDGIFVYFPDEQVLYGNCILKEKLGNLSFANVKAYPQTIERLKAMKLPIKTVIGGHDSPLHGPELIDHYEELIKAVPQS	1	254	99.6063	0	0	0	254	Cluster_4	ChpA_family_subclass_B2_metallo-beta-lactamase_ImiS_NG_050415.1_cds_WP_063865298.1_1	Cluster_4	SP_Sec_SPI_	27-28	SP_Sec_SPI_	27-28	N_Y_H_T_D	C	H	.	.
B2_1067	GCF_963883185.1	654	654	Aeromonas_veronii	Bacteria-Pseudomonadota-Gammaproteobacteria-Aeromonadales-Aeromonadaceae-Aeromonas-	4462471	NZ_CAWOOG010000018.1	class_B2	547.6	-	12461	13220	12459	13223	ATGATGAAAGGTTGGATGAAGTGCACATTGGCCGGGGCTGTGGTGCTGATGGCGAGTTTCTGGGGTGGCAGCGTGCGGGCGGCTGGGATCGAGCTCAAGCAGGTGAGCGGCCCTGTCTATGTGGTCGAGGACAACTACTACGTCAAAGAGAACTCCATGGTCTATTTCGGGGCCAAGGGGGTGACTGTGGTGGGGGCGACCTGGACGCCGGATACCGCCCGCGAGTTGCATAAGCTCATTAAACGGGTCAGCAGCAAGCCGGTGCTGGAGGTGATCAACACCAACTACCACACCGACCGGGCGGGCGGTAACGCCTACTGGAAGTCCATCGGGGCCAAGGTGGTGGCGACGCGCCAGACCCGGGATCTGATGAAGAGCGACTGGGCCGAGATTGTCGCC…	WP_128834085.1	CphA_family_subclass_B2_metallo-beta-lactamase	MMKGWMKCTLAGAVVLMASFWGGSVRAAGIELKQVSGPVYVVEDNYYVKENSMVYFGAKGVTVVGATWTPDTARELHKLIKRVSSKPVLEVINTNYHTDRAGGNAYWKSIGAKVVATRQTRDLMKSDWAEIVAFTRKGLPEYPDLPLVLPNVVHDGDFTLQEGKLRAFYAGPAHTPDGIFVYFPDEQVLYGNCILKEKLGNLSFANVKAYPQTIERLKAMKLPIKTVIGGHDSPLHGPELIDHYEELIKAVPQS	ORF_OK	TRUE_HIT	mmkgwikcglagavvllasfwggsvraagislkqvsgpvyvvednyyvkensmvyfgakgvtvvgatwtpdtarelhklikrvsskpvlevintnyhtdraggnaywksigakvvatrqtrdlmksdwaeivaftrkglpeypdlplvlpnvvhdgdftlqegkvralyagpahtpdgifvyfpdeqvlygncilkeklgnlsfadvkaypktlerlkalklpiktvigghdsplhgpelidhyealikaaaks	MMKGWMKCTLAGAVVLMASFWGGSVRAAGIELKQVSGPVYVVEDNYYVKENSMVYFGAKGVTVVGATWTPDTARELHKLIKRVSSKPVLEVINTNYHTDRAGGNAYWKSIGAKVVATRQTRDLMKSDWAEIVAFTRKGLPEYPDLPLVLPNVVHDGDFTLQEGKLRAFYAGPAHTPDGIFVYFPDEQVLYGNCILKEKLGNLSFANVKAYPQTIERLKAMKLPIKTVIGGHDSPLHGPELIDHYEELIKAVPQS	1	254	99.6063	0	0	0	254	Cluster_4	ChpA_family_subclass_B2_metallo-beta-lactamase_ImiS_NG_050415.1_cds_WP_063865298.1_1	Cluster_4	SP_Sec_SPI_	27-28	SP_Sec_SPI_	27-28	N_Y_H_T_D	C	H	.	.
B2_1068	GCF_963883195.1	654	654	Aeromonas_veronii	Bacteria-Pseudomonadota-Gammaproteobacteria-Aeromonadales-Aeromonadaceae-Aeromonas-	4599254	NZ_CAWOOF010000005.1	class_B2	547.2	-	9195	9954	9193	9957	ATGATGAAAGGTTGGATGAAGTGCACATTGGCCGGAGCTGTGGTGCTGATGGCGAGTTTCTGGGGGGGCAGCGTGCGGGCGGCGGGGATCTCCCTCAAGCAGGTGAGCGGCCCTGTTTACGTGGTTGAAGATAACTACTACGTAAAGGAAAACTCCATGGTCTATTTCGGGGCCAAGGGGGTGACTGTGGTGGGGGCGACCTGGACGCCGGATACCGCCCGCGAGCTGCACAAGCTGATCAAACGGGTCAGCAGCAAGCCGGTGCTGGAGGTGATCAACACCAACTACCACACCGATCGGGCGGGCGGTAACGCCTACTGGAAGTCCATCGGGGCCAAGGTGGTGGCGACGCGCCAGACCCGGGATCTGATGAAGAGCGACTGGGCCGAGATTGTCGCC…	WP_083851951.1	CphA_family_subclass_B2_metallo-beta-lactamase	MMKGWMKCTLAGAVVLMASFWGGSVRAAGISLKQVSGPVYVVEDNYYVKENSMVYFGAKGVTVVGATWTPDTARELHKLIKRVSSKPVLEVINTNYHTDRAGGNAYWKSIGAKVVATRQTRDLMKSDWAEIVAFTRKGLPEYPDLPLVLPNVVHDGDFTLQEGKVRAFYAGPAHTPDGIFVYFPDEQVLYGNCILKEKLGNLSFANVKAYPQTIERLKAMKLPIKTVIGGHDSPLHGPELIDHYEELIKAVPQS	ORF_OK	TRUE_HIT	mmkgwikcglagavvllasfwggsvraagislkqvsgpvyvvednyyvkensmvyfgakgvtvvgatwtpdtarelhklikrvsskpvlevintnyhtdraggnaywksigakvvatrqtrdlmksdwaeivaftrkglpeypdlplvlpnvvhdgdftlqegkvralyagpahtpdgifvyfpdeqvlygncilkeklgnlsfadvkaypktlerlkalklpiktvigghdsplhgpelidhyealikaaaks	MMKGWMKCTLAGAVVLMASFWGGSVRAAGISLKQVSGPVYVVEDNYYVKENSMVYFGAKGVTVVGATWTPDTARELHKLIKRVSSKPVLEVINTNYHTDRAGGNAYWKSIGAKVVATRQTRDLMKSDWAEIVAFTRKGLPEYPDLPLVLPNVVHDGDFTLQEGKVRAFYAGPAHTPDGIFVYFPDEQVLYGNCILKEKLGNLSFANVKAYPQTIERLKAMKLPIKTVIGGHDSPLHGPELIDHYEELIKAVPQS	1	254	99.6063	0	0	0	254	Cluster_4	ChpA_family_subclass_B2_metallo-beta-lactamase_ImiS_NG_050415.1_cds_WP_063865298.1_1	Cluster_4	SP_Sec_SPI_	27-28	SP_Sec_SPI_	27-28	N_Y_H_T_D	C	H	.	.
B2_1069	GCF_963883215.1	650	650	Aeromonas_jandaei	Bacteria-Pseudomonadota-Gammaproteobacteria-Aeromonadales-Aeromonadaceae-Aeromonas-	4631117	NZ_CAWOPP010000009.1	class_B2	550.1	-	933	1692	931	1695	ATGATGAAAGGTTGGATGAAGTGCACATTGGCCGGAGCCGTGGTGCTGATGGCGAGTTTCTGGGGCGGCAGCGTGCGGGCGGCGGGGATCTCCCTCAAGCAGGTAAGCGGCCCTGTCTATGTTGTTGAAGACAACTACTACGTCAAAGAGAACTCCATGGTCTATTTCGGGGCCAAGGGGGTGACGGTAGTGGGGGCGACCTGGACGCCGGATACCGCTCGCGAGCTGCATAAGCTCATTAAACGGGTCAGCAGCAAGCCGGTGCTGGAGGTGATCAACACCAACTACCACACCGACCGGGCGGGCGGTAACGCCTACTGGAAGTCCATCGGGGCCAAGGTGGTGGCGACCCGCCAGACCCGGGATCTGATGAAGAGTGACTGGGCCGAGATTGTCGCC…	WP_139396099.1	CphA_family_subclass_B2_metallo-beta-lactamase	MMKGWMKCTLAGAVVLMASFWGGSVRAAGISLKQVSGPVYVVEDNYYVKENSMVYFGAKGVTVVGATWTPDTARELHKLIKRVSSKPVLEVINTNYHTDRAGGNAYWKSIGAKVVATRQTRDLMKSDWAEIVAFTRKGLPEYPDLPLVLPNVVHDGDFTLQEGKVRAFYAGPAHTPDGIFVYFPDEQVLYGNCILKEKLGNLSFANVKEYPQTIERLKAMKLPIKTVIGGHDSPLHGPELIDHYEALIKAAPQS	ORF_OK	TRUE_HIT	mmkgwikcglagavvllasfwggsvraagislkqvsgpvyvvednyyvkensmvyfgakgvtvvgatwtpdtarelhklikrvsskpvlevintnyhtdraggnaywksigakvvatrqtrdlmksdwaeivaftrkglpeypdlplvlpnvvhdgdftlqegkvralyagpahtpdgifvyfpdeqvlygncilkeklgnlsfadvkaypktlerlkalklpiktvigghdsplhgpelidhyealikaaaks	MMKGWMKCTLAGAVVLMASFWGGSVRAAGISLKQVSGPVYVVEDNYYVKENSMVYFGAKGVTVVGATWTPDTARELHKLIKRVSSKPVLEVINTNYHTDRAGGNAYWKSIGAKVVATRQTRDLMKSDWAEIVAFTRKGLPEYPDLPLVLPNVVHDGDFTLQEGKVRAFYAGPAHTPDGIFVYFPDEQVLYGNCILKEKLGNLSFANVKEYPQTIERLKAMKLPIKTVIGGHDSPLHGPELIDHYEALIKAAPQS	1	254	99.6063	0	0	0	254	Cluster_4	ChpA_family_subclass_B2_metallo-beta-lactamase_ImiS_NG_050415.1_cds_WP_063865298.1_1	Cluster_4	SP_Sec_SPI_	27-28	SP_Sec_SPI_	27-28	N_Y_H_T_D	C	H	.	.
B2_107	GCF_006246485.1	654	654	Aeromonas_veronii	Bacteria-Pseudomonadota-Gammaproteobacteria-Aeromonadales-Aeromonadaceae-Aeromonas-	4600367	NZ_NKXC01000032.1	class_B2	541.1	+	136270	137029	136268	137032	ATGATGAAAGGTTGGATGAAGTGCGGATTGGCCGGGGCCGTGGTGCTGATGGCGAGTTTCTGGGGTGGCAGCGTGCGGGCAGCGGGGATCGAGCTCAAGCAGGTAAGCGGCCCTGTCTATGTTGTTGAAGACAACTACTACGTCAAAGAGAACTCCATGGTCTATTTCGGGGCCAAGGGGGTGACGGTGGTGGGGGCGACCTGGACGCCGGATACCGCCCGCGAGCTGCACAAGCTCATTAAACGGGTCAGCAGCAAGCCGGTGCTGGAGGTGATCAACACCAACTACCACACCGATCGGGCGGGCGGTAACGCCTACTGGAAGTCCATCGGGGCCAAGGTGGTGGCGACGCGCCAGACCCGGGATCTGATGAAGAGCGACTGGGCCGAGATTGTCGCC…	WP_139748266.1	CphA_family_subclass_B2_metallo-beta-lactamase	MMKGWMKCGLAGAVVLMASFWGGSVRAAGIELKQVSGPVYVVEDNYYVKENSMVYFGAKGVTVVGATWTPDTARELHKLIKRVSSKPVLEVINTNYHTDRAGGNAYWKSIGAKVVATRQTRDLMKSDWAEIVAFTRKGLPEYPDLPLVLPNVVHDGDFTQQDGKVRAFYAGPAHTPDGIFVYFPDEQVLYGNCILKEKLGNLSFANVKAYPQTIERLKAMKLPIKTVIGGHDSPLHGPELIDHYEELIKAVPQS	ORF_OK	TRUE_HIT	mmkgwikcglagavvllasfwggsvraagislkqvsgpvyvvednyyvkensmvyfgakgvtvvgatwtpdtarelhklikrvsskpvlevintnyhtdraggnaywksigakvvatrqtrdlmksdwaeivaftrkglpeypdlplvlpnvvhdgdftlqegkvralyagpahtpdgifvyfpdeqvlygncilkeklgnlsfadvkaypktlerlkalklpiktvigghdsplhgpelidhyealikaaaks	MMKGWMKCGLAGAVVLMASFWGGSVRAAGIELKQVSGPVYVVEDNYYVKENSMVYFGAKGVTVVGATWTPDTARELHKLIKRVSSKPVLEVINTNYHTDRAGGNAYWKSIGAKVVATRQTRDLMKSDWAEIVAFTRKGLPEYPDLPLVLPNVVHDGDFTQQDGKVRAFYAGPAHTPDGIFVYFPDEQVLYGNCILKEKLGNLSFANVKAYPQTIERLKAMKLPIKTVIGGHDSPLHGPELIDHYEELIKAVPQS	1	254	99.6063	0	0	0	254	Cluster_4	ChpA_family_subclass_B2_metallo-beta-lactamase_ImiS_NG_050415.1_cds_WP_063865298.1_1	Cluster_4	SP_Sec_SPI_	27-28	SP_Sec_SPI_	27-28	N_Y_H_T_D	C	H	.	.
B2_1070	GCF_963883225.1	196024	196024	Aeromonas_dhakensis	Bacteria-Pseudomonadota-Gammaproteobacteria-Aeromonadales-Aeromonadaceae-Aeromonas-	4855378	NZ_CAWOOV010000008.1	class_B2	537.8	+	119016	119775	119017	119778	ATGAAAGGTTGGATAAAGTGCGGATTGGCCGGAGCCGTGGTGCTGATGGCGAGTTTCTGGGGTGGCAGCGTGCGTGCGGCGGGGATGTCGCTGACGCAGGTGAGCGGCCCTGTCTATGTGGTGGAGGACAACTACTACGTCAAAGAGAACTCCATGGTCTATTTCGGGGCCAGGGGGGTGACTGTGGTGGGGGCAACCTGGACGCCGGATACCGCCCGCGAGCTGCACAAGCTGATCAAACGGGTCAGCCGCAAGCCGGTGCTGGAGGTGATCAACACCAACTACCACACCGACCGTGCCGGCGGTAACGCCTACTGGAAGTCCATCGGGGCCAAGGTGGTGGCGACGCGCCAGACCCGGGATCTGATGAAGAGCGACTGGGCCGAGATTGTCGCCTTT…	WP_240035829.1	CphA_family_subclass_B2_metallo-beta-lactamase	MKGWIKCGLAGAVVLMASFWGGSVRAAGMSLTQVSGPVYVVEDNYYVKENSMVYFGARGVTVVGATWTPDTARELHKLIKRVSRKPVLEVINTNYHTDRAGGNAYWKSIGAKVVATRQTRDLMKSDWAEIVAFTRKGLPEYPDLPLVLPNVVHEGYFTLQEGKLRAFYAGPAHTPDGIFVYFPDEQVLYGNCILKEKLGNLSFADVKAYPQTLERLKAMKLPIKTVVGGHDSPLHGPELIDHYEALIKAVPQS	ORF_OK	TRUE_HIT	mmkgwikcglagavvllasfwggsvraagislkqvsgpvyvvednyyvkensmvyfgakgvtvvgatwtpdtarelhklikrvsskpvlevintnyhtdraggnaywksigakvvatrqtrdlmksdwaeivaftrkglpeypdlplvlpnvvhdgdftlqegkvralyagpahtpdgifvyfpdeqvlygncilkeklgnlsfadvkaypktlerlkalklpiktvigghdsplhgpelidhyealikaaaks	MMKGWIKCGLAGAVVLMASFWGGSVRAAGMSLTQVSGPVYVVEDNYYVKENSMVYFGARGVTVVGATWTPDTARELHKLIKRVSRKPVLEVINTNYHTDRAGGNAYWKSIGAKVVATRQTRDLMKSDWAEIVAFTRKGLPEYPDLPLVLPNVVHEGYFTLQEGKLRAFYAGPAHTPDGIFVYFPDEQVLYGNCILKEKLGNLSFADVKAYPQTLERLKAMKLPIKTVVGGHDSPLHGPELIDHYEALIKAVPQS	1	254	99.6063	0	0	0	253	Cluster_4	ChpA_family_subclass_B2_metallo-beta-lactamase_ImiS_NG_050415.1_cds_WP_063865298.1_1	Cluster_4	SP_Sec_SPI_	26-27	SP_Sec_SPI_	26-27	N_Y_H_T_D	C	H	.	.
B2_1071	GCF_963883255.1	654	654	Aeromonas_veronii	Bacteria-Pseudomonadota-Gammaproteobacteria-Aeromonadales-Aeromonadaceae-Aeromonas-	4520735	NZ_CAWOPL010000048.1	class_B2	550.6	-	9405	10164	9403	10167	ATGATGAAAAGTTGGATGAAGTGTGGATTGGCCGGGGCCGTGGTGCTGATGGCGAGTTTCTGGGGGGGTAGCGTGCGGGCGGCGGGGATCTCCCTTAAGCAGGTGAGCGGCCCTGTTTACGTGGTTGAAGATAACTACTACGTAAAGGAAAACTCCATGGTCTATTTCGGGGCCAAGGGGGTGACGGTGGTGGGGGCGACCTGGACGCCGGATACCGCCCGTGAGCTGCACAAGCTGATCAAACGGGTCAGCAGCAAGCCGGTGCTGGAGGTGATCAACACCAACTACCACACCGATCGGGCGGGCGGTAACGCCTACTGGAAGTCCATCGGAGCCAAGGTGGTGGCGACGCGCCAGACCCGGGATCTGATGAAGAGCGACTGGGCCGAGATTGTCGCC…	WP_139441960.1	CphA_family_subclass_B2_metallo-beta-lactamase	MMKSWMKCGLAGAVVLMASFWGGSVRAAGISLKQVSGPVYVVEDNYYVKENSMVYFGAKGVTVVGATWTPDTARELHKLIKRVSSKPVLEVINTNYHTDRAGGNAYWKSIGAKVVATRQTRDLMKSDWAEIVAFTRKGLPEYPDLPLVLPNVVHDGDFTLQDGKVRAFYAGPAHTPDGIFVYFPDEQVLYGNCILKEKLGNLSFANVKAYPQTIERLKAMKLPIKTVIGGHDSPLHGPELIDHYEELIKAAPQS	ORF_OK	TRUE_HIT	mmkgwikcglagavvllasfwggsvraagislkqvsgpvyvvednyyvkensmvyfgakgvtvvgatwtpdtarelhklikrvsskpvlevintnyhtdraggnaywksigakvvatrqtrdlmksdwaeivaftrkglpeypdlplvlpnvvhdgdftlqegkvralyagpahtpdgifvyfpdeqvlygncilkeklgnlsfadvkaypktlerlkalklpiktvigghdsplhgpelidhyealikaaaks	MMKSWMKCGLAGAVVLMASFWGGSVRAAGISLKQVSGPVYVVEDNYYVKENSMVYFGAKGVTVVGATWTPDTARELHKLIKRVSSKPVLEVINTNYHTDRAGGNAYWKSIGAKVVATRQTRDLMKSDWAEIVAFTRKGLPEYPDLPLVLPNVVHDGDFTLQDGKVRAFYAGPAHTPDGIFVYFPDEQVLYGNCILKEKLGNLSFANVKAYPQTIERLKAMKLPIKTVIGGHDSPLHGPELIDHYEELIKAAPQS	1	254	99.6063	0	0	0	254	Cluster_4	ChpA_family_subclass_B2_metallo-beta-lactamase_ImiS_NG_050415.1_cds_WP_063865298.1_1	Cluster_4	SP_Sec_SPI_	27-28	SP_Sec_SPI_	27-28	N_Y_H_T_D	C	H	.	.
B2_1072	GCF_963883605.1	196024	196024	Aeromonas_dhakensis	Bacteria-Pseudomonadota-Gammaproteobacteria-Aeromonadales-Aeromonadaceae-Aeromonas-	4715031	NZ_CAWOQW010000057.1	class_B2	539.5	-	12174	12933	12172	12933	ATGAAAGGTTGGATAAAGTGCGGGCTGGCCGGCGCCGTGGTGCTGGTGGCGAGCTTCTGGGGTGGCAGCGTGCGGGCGGCGGGGATGTCGCTGACGCAAGTGAGCGGCCCTGTCTATGTGGTCGAGGACAACTACTACATACAGGAAAACTCCATGGTCTATTTCGGGGCCAAGGGGGTGACGGTAGTGGGGGCGACCTGGACGCCAGATACCGCCCGTGAGCTGCACAAGCTGATCAAACGGGTCAGCCGCCAGCCGGTGCTGGAGGTGATCAACACCAACTACCACACCGACCGGGCAGGCGGTAACGCCTACTGGAAGTCCATCGGGGCCAAGGTGGTATCGACCCGTCAGACCCGGGACCTGATGAAGAGCGACTGGGCCGAAATCGTGGCCTTT…	WP_241658671.1	CphA_family_subclass_B2_metallo-beta-lactamase	MKGWIKCGLAGAVVLVASFWGGSVRAAGMSLTQVSGPVYVVEDNYYIQENSMVYFGAKGVTVVGATWTPDTARELHKLIKRVSRQPVLEVINTNYHTDRAGGNAYWKSIGAKVVSTRQTRDLMKSDWAEIVAFTRKGLPEYPDLPLVLPNVVHDGDFTLQEGKLRAFYAGPAHTPDGIFVYFPDEQVLYGNCILKEKLGNLSFADVKAYPQTLERLKAMKLPIKTVVGGHDSPLHGPELIDHYEALIKAVPQS	ORF_OK	TRUE_HIT	mmkgwikcglagavvllasfwggsvraagislkqvsgpvyvvednyyvkensmvyfgakgvtvvgatwtpdtarelhklikrvsskpvlevintnyhtdraggnaywksigakvvatrqtrdlmksdwaeivaftrkglpeypdlplvlpnvvhdgdftlqegkvralyagpahtpdgifvyfpdeqvlygncilkeklgnlsfadvkaypktlerlkalklpiktvigghdsplhgpelidhyealikaaaks	MMKGWIKCGLAGAVVLVASFWGGSVRAAGMSLTQVSGPVYVVEDNYYIQENSMVYFGAKGVTVVGATWTPDTARELHKLIKRVSRQPVLEVINTNYHTDRAGGNAYWKSIGAKVVSTRQTRDLMKSDWAEIVAFTRKGLPEYPDLPLVLPNVVHDGDFTLQEGKLRAFYAGPAHTPDGIFVYFPDEQVLYGNCILKEKLGNLSFADVKAYPQTLERLKAMKLPIKTVVGGHDSPLHGPELIDHYEALIKAVPQS	1	254	99.6063	0	0	0	253	Cluster_4	ChpA_family_subclass_B2_metallo-beta-lactamase_ImiS_NG_050415.1_cds_WP_063865298.1_1	Cluster_4	SP_Sec_SPI_	26-27	SP_Sec_SPI_	26-27	N_Y_H_T_D	C	H	.	.
B2_1073	GCF_963883775.1	654	654	Aeromonas_veronii	Bacteria-Pseudomonadota-Gammaproteobacteria-Aeromonadales-Aeromonadaceae-Aeromonas-	4621851	NZ_CAWORL010000024.1	class_B2	548.2	+	19387	20146	19385	20149	ATGATGAAAGGTTGGATGAAGTGCGGATTGGCCGGGGCCGTGGTGCTGATGGCGAGTTTCTGGGGTGGCAGCGTGCGGGCGGCGGGGATCTCCCTCAAGCAGGTGAGCGGCCCTGTTTACGTGGTTGAAGATAACTACTACGTAAAGGAAAACTCCATGGTCTATTTCGGGGCCAAGGGGGTGACGGTAGTGGGGGCGACCTGGACGCCGGATACCGCCCGCGAGCTGCATAAGCTGATCAAACGGGTCAGCAGCAAGCCGGTACTGGAGGTGATCAACACCAACTACCACACCGATCGGGCGGGCGGTAATGCCTACTGGAAGTCCATCGGGGCCAAGGTGGTGGCGACGCGCCAGACCCGGGATCTGATGAAGAGCGACTGGGCCGAGATTGTCGCC…	WP_080644389.1	CphA_family_subclass_B2_metallo-beta-lactamase	MMKGWMKCGLAGAVVLMASFWGGSVRAAGISLKQVSGPVYVVEDNYYVKENSMVYFGAKGVTVVGATWTPDTARELHKLIKRVSSKPVLEVINTNYHTDRAGGNAYWKSIGAKVVATRQTRDLMKSDWAEIVAFTRKGLPEYPDLPLVLPNVVHDGDFTLQEGKVRAFYAGPAHTPDGIFVYFPDEQVLYGNCILKEKLGNLSFANVKAYPQTIERLKAMKLPIKTVIGGHDSPLHGPELIDHYEELIKAVPQS	ORF_OK	TRUE_HIT	mmkgwikcglagavvllasfwggsvraagislkqvsgpvyvvednyyvkensmvyfgakgvtvvgatwtpdtarelhklikrvsskpvlevintnyhtdraggnaywksigakvvatrqtrdlmksdwaeivaftrkglpeypdlplvlpnvvhdgdftlqegkvralyagpahtpdgifvyfpdeqvlygncilkeklgnlsfadvkaypktlerlkalklpiktvigghdsplhgpelidhyealikaaaks	MMKGWMKCGLAGAVVLMASFWGGSVRAAGISLKQVSGPVYVVEDNYYVKENSMVYFGAKGVTVVGATWTPDTARELHKLIKRVSSKPVLEVINTNYHTDRAGGNAYWKSIGAKVVATRQTRDLMKSDWAEIVAFTRKGLPEYPDLPLVLPNVVHDGDFTLQEGKVRAFYAGPAHTPDGIFVYFPDEQVLYGNCILKEKLGNLSFANVKAYPQTIERLKAMKLPIKTVIGGHDSPLHGPELIDHYEELIKAVPQS	1	254	99.6063	0	0	0	254	Cluster_4	ChpA_family_subclass_B2_metallo-beta-lactamase_ImiS_NG_050415.1_cds_WP_063865298.1_1	Cluster_4	SP_Sec_SPI_	27-28	SP_Sec_SPI_	27-28	N_Y_H_T_D	C	H	.	.
B2_1074	GCF_963885675.1	654	654	Aeromonas_veronii	Bacteria-Pseudomonadota-Gammaproteobacteria-Aeromonadales-Aeromonadaceae-Aeromonas-	4762818	NZ_CAWOZB010000001.1	class_B2	542.7	+	3829753	3830512	3829751	3830515	ATGATGAAAGGTTGGATAAAGTGCACATTGGCCGGGGCCGTGGTGCTGATGGCGAGTTTCTGGGGTGGTAGCGTGCGGGCGGCGGGGATCTCCCTCAAGCAGGTGAGTGGCCCTGTTTACGTGGTTGAAGATAACTACTACGTAAAGGAAAACTCCATGGTCTATTTCGGGGCCAAGGGGGTGACAGTGGTGGGGGCGACCTGGACGCCGGATACCGCCCGCGAGCTGCACAAGCTGATAAAAAGAGTCAGCAGCAAGCCGGTGCTGGAGGTGATCAACACCAACTACCACACCGACCGGGCGGGCGGTAACGCCTACTGGAAGTCCATCGGGGCCAAGGTGGTGGCGACGCGCCAGACCCGGGATCTGATGAAGAGCGACTGGGCCGAGATTGTCGCC…	WP_157162018.1	CphA_family_subclass_B2_metallo-beta-lactamase	MMKGWIKCTLAGAVVLMASFWGGSVRAAGISLKQVSGPVYVVEDNYYVKENSMVYFGAKGVTVVGATWTPDTARELHKLIKRVSSKPVLEVINTNYHTDRAGGNAYWKSIGAKVVATRQTRDLMKSDWAEIVAFTRKGLPEYPDLPLVLPNVVHDGDFTLQEGKVRAFYAGPAHTPDGIFVYFPDEQVLYGNCILKEKLGNLSFANVKAYPQTIERLKAMKLPIKTVIGGHDSPLHGPELIDHYEELIKAAPQS	ORF_OK	TRUE_HIT	mmkgwikcglagavvllasfwggsvraagislkqvsgpvyvvednyyvkensmvyfgakgvtvvgatwtpdtarelhklikrvsskpvlevintnyhtdraggnaywksigakvvatrqtrdlmksdwaeivaftrkglpeypdlplvlpnvvhdgdftlqegkvralyagpahtpdgifvyfpdeqvlygncilkeklgnlsfadvkaypktlerlkalklpiktvigghdsplhgpelidhyealikaaaks	MMKGWIKCTLAGAVVLMASFWGGSVRAAGISLKQVSGPVYVVEDNYYVKENSMVYFGAKGVTVVGATWTPDTARELHKLIKRVSSKPVLEVINTNYHTDRAGGNAYWKSIGAKVVATRQTRDLMKSDWAEIVAFTRKGLPEYPDLPLVLPNVVHDGDFTLQEGKVRAFYAGPAHTPDGIFVYFPDEQVLYGNCILKEKLGNLSFANVKAYPQTIERLKAMKLPIKTVIGGHDSPLHGPELIDHYEELIKAAPQS	1	254	99.6063	0	0	0	254	Cluster_4	ChpA_family_subclass_B2_metallo-beta-lactamase_ImiS_NG_050415.1_cds_WP_063865298.1_1	Cluster_4	SP_Sec_SPI_	27-28	SP_Sec_SPI_	27-28	N_Y_H_T_D	C	H	.	.
B2_1075	GCF_963886305.1	645	645	Aeromonas_salmonicida	Bacteria-Pseudomonadota-Gammaproteobacteria-Aeromonadales-Aeromonadaceae-Aeromonas-	4838016	NZ_CAWPBY010000034.1	class_B2	538.3	-	13173	13926	13168	13929	ATGAAAGGTTGGATAAAGTGCGGGCTGGCCGGAGCTGTGGTGCTGGTGGCGAGTTTCTGGGGCGGCAGCGTGCATGCGGCGGCGATCTCCCTCACTCAGGTGAGCGGCCCCGTGTATGTCGTAGAGGATAACTACTACGTCAAAGAGAACTCCATGGTCTATTTCGGGGCCAAGGGAGTGACGGTAGTGGGGGCGACCTGGACGCCGGATACCGCCCGAGAGCTGCACAAGCTGATCAAGCGGGTCAGCAACAAGCCAGTGCTGGAGGTGATCAACACCAACTACCACACGGACAGGGCAGGGGGTAACGCCTACTGGAAGTCCATCGGTGCCAAGGTGGTGTCGACCCGCCAGACCCGGGATCTGATGAAGAGCGACTGGGCCGAGATTGTCGCATTT…	WP_155604014.1	CphA_family_subclass_B2_metallo-beta-lactamase	MKGWIKCGLAGAVVLVASFWGGSVHAAAISLTQVSGPVYVVEDNYYVKENSMVYFGAKGVTVVGATWTPDTARELHKLIKRVSNKPVLEVINTNYHTDRAGGNAYWKSIGAKVVSTRQTRDLMKSDWAEIVAFTRKGLPEYPDLPLVLPNVVHDGDFTLQEGKLRAFYAGPAHTPDGIFVYFPDQQVLYGNCILKEKLGNLSFADVKAYPQTLERLKAMKLPIKIVVGGHDSPLHGPELIDHYQSLVKAAPQA	ORF_OK	TRUE_HIT	mkgwikcglagavvllasfwggsvraagislkqvsgpvyvvednyyvkensmvyfgakgvtvvgatwtpdtarelhklikrvsskpvlevintnyhtdraggnaywksigakvvatrqtrdlmksdwaeivaftrkglpeypdlplvlpnvvhdgdftlqegkvralyagpahtpdgifvyfpdeqvlygncilkeklgnlsfadvkaypktlerlkalklpiktvigghdsplhgpelidhyealikaaak	MKGWIKCGLAGAVVLVASFWGGSVHAAAISLTQVSGPVYVVEDNYYVKENSMVYFGAKGVTVVGATWTPDTARELHKLIKRVSNKPVLEVINTNYHTDRAGGNAYWKSIGAKVVSTRQTRDLMKSDWAEIVAFTRKGLPEYPDLPLVLPNVVHDGDFTLQEGKLRAFYAGPAHTPDGIFVYFPDQQVLYGNCILKEKLGNLSFADVKAYPQTLERLKAMKLPIKIVVGGHDSPLHGPELIDHYQSLVKAAPQ	2	253	98.8189	0	0	0	253	Cluster_4	ChpA_family_subclass_B2_metallo-beta-lactamase_ImiS_NG_050415.1_cds_WP_063865298.1_1	Cluster_4	SP_Sec_SPI_	26-27	SP_Sec_SPI_	26-27	N_Y_H_T_D	C	H	.	.
B2_1076	GCF_963886745.1	654	654	Aeromonas_veronii	Bacteria-Pseudomonadota-Gammaproteobacteria-Aeromonadales-Aeromonadaceae-Aeromonas-	4608970	NZ_CAWPDH010000032.1	class_B2	543.9	+	340904	341663	340902	341666	ATGATGAAAGGTTGGATGAAGTGCACATTGGCCGGGGCCATGGTGCTGATGGCGAGTTTCTGGGGTGGCAGCGTGCGGGCGGCGGGGATCGAACTCAAACAGGTGAGCGGCCCTGTCTATGTGGTGGAGGACAACTACTACGTCAAAGAGAACTCCATGGTCTATTTCGGGGCCAAGGGGGTGACTGTGGTGGGGGCGACCTGGACGCCGGATACCGCCCGTGAGCTGCACAAGCTGATCAAACGGGTCAGCAGCAAGCCGGTGCTGGAGGTGATCAACACCAACTACCACACCGACCGGGCGGGCGGTAACGCCTACTGGAAGTCCATCGGGGCCAAGGTGGTAGCGACGCGCCAGACCCGGGATCTGATGAAGAGCGACTGGGCCGAGATTGTCGCC…	WP_158112842.1	CphA_family_subclass_B2_metallo-beta-lactamase	MMKGWMKCTLAGAMVLMASFWGGSVRAAGIELKQVSGPVYVVEDNYYVKENSMVYFGAKGVTVVGATWTPDTARELHKLIKRVSSKPVLEVINTNYHTDRAGGNAYWKSIGAKVVATRQTRDLMKSDWAEIVAFTRKGLPEYPDLPLVLPNVVHDGDFTLQEGKVRAFYAGPAHTPDGIFVYFPDEQVLYGNCILKEKLGNLSFANVKEYPQTIERLKAMKLPIKTVIGGHDSPLHGPELIDHYEELIKAAPQS	ORF_OK	TRUE_HIT	mmkgwikcglagavvllasfwggsvraagislkqvsgpvyvvednyyvkensmvyfgakgvtvvgatwtpdtarelhklikrvsskpvlevintnyhtdraggnaywksigakvvatrqtrdlmksdwaeivaftrkglpeypdlplvlpnvvhdgdftlqegkvralyagpahtpdgifvyfpdeqvlygncilkeklgnlsfadvkaypktlerlkalklpiktvigghdsplhgpelidhyealikaaaks	MMKGWMKCTLAGAMVLMASFWGGSVRAAGIELKQVSGPVYVVEDNYYVKENSMVYFGAKGVTVVGATWTPDTARELHKLIKRVSSKPVLEVINTNYHTDRAGGNAYWKSIGAKVVATRQTRDLMKSDWAEIVAFTRKGLPEYPDLPLVLPNVVHDGDFTLQEGKVRAFYAGPAHTPDGIFVYFPDEQVLYGNCILKEKLGNLSFANVKEYPQTIERLKAMKLPIKTVIGGHDSPLHGPELIDHYEELIKAAPQS	1	254	99.6063	0	0	0	254	Cluster_4	ChpA_family_subclass_B2_metallo-beta-lactamase_ImiS_NG_050415.1_cds_WP_063865298.1_1	Cluster_4	SP_Sec_SPI_	27-28	SP_Sec_SPI_	27-28	N_Y_H_T_D	C	H	.	.
B2_1077	GCF_963886775.1	650	650	Aeromonas_jandaei	Bacteria-Pseudomonadota-Gammaproteobacteria-Aeromonadales-Aeromonadaceae-Aeromonas-	4757182	NZ_CAWPET010000397.1	class_B2	331	-	10836	11322	10774	11325	ATGATGAAAGGTTGGATGAAGTGCGGGTTGGCCGGGGCCGTGGTGCTGATGGCGAGTTTCTGGGGTGGCAGCGTGCGGGCGGCGGGGATCTCCCTCAAGCAGGTGAGCGGCCCTGTCTATGTGGTGGAGGACAACTACTACGTCAAAGAGAACTCCATGGTCTATTTCGGGGCCAAGGGAGTGACGGTGGTGGGGGCGACCTGGACGCCGGATACCGCCCGCGAGCTGCACAAGCTGATCAAACGGGTCAGCAGCAAGCCGGTGCTGGAGGTGATCAACACCAACTACCACACCGATCGGGCGGGCGGTAACGCCTACTGGAAGTCCATCGGGGCCAAGGTGGTGGCGACGCGCCAGACCCGGGATCTGATGAAGAGCGACTGGGCCGAGATTGTCGCC…	WP_232354387.1	MBL_fold_metallo-hydrolase	MMKGWMKCGLAGAVVLMASFWGGSVRAAGISLKQVSGPVYVVEDNYYVKENSMVYFGAKGVTVVGATWTPDTARELHKLIKRVSSKPVLEVINTNYHTDRAGGNAYWKSIGAKVVATRQTRDLMKSDWAEIVAFTRKGLPEYPDLPLVLPNVVHDGDFKRKRGCREVAGIQGCLNVFPSLCSR	ORF_OK	TRUE_HIT	mmkgwikcglagavvllasfwggsvraagislkqvsgpvyvvednyyvkensmvyfgakgvtvvgatwtpdtarelhklikrvsskpvlevintnyhtdraggnaywksigakvvatrqtrdlmksdwaeivaftrkglpeypdlplvlpnvvhdgdftlqeg	MMKGWMKCGLAGAVVLMASFWGGSVRAAGISLKQVSGPVYVVEDNYYVKENSMVYFGAKGVTVVGATWTPDTARELHKLIKRVSSKPVLEVINTNYHTDRAGGNAYWKSIGAKVVATRQTRDLMKSDWAEIVAFTRKGLPEYPDLPLVLPNVVHDGDFKRKRG	1	163	63.7795	0	0	0	183	Cluster_16	CLUSTER_NOT_IN_NCBI_AMR_REF_DB	Cluster_15	SP_Sec_SPI_	27-28	SP_Sec_SPI_	27-28	N_Y_H_T_D	gnc_region_disrupted_incoclusive	dhy_region_disrupted_incoclusive	.	.
B2_1078	GCF_963886775.1	650	650	Aeromonas_jandaei	Bacteria-Pseudomonadota-Gammaproteobacteria-Aeromonadales-Aeromonadaceae-Aeromonas-	4757182	NZ_CAWPET010000397.1	class_B2	545.3	-	9738	10497	9736	10500	ATGATGAAAGGTTGGATGAAGTGCGGGTTGGCCGGGGCCGTGGTGCTGATGGCGAGTTTCTGGGGTGGCAGCGTGCGGGCGGCAGGGATCTCCCTCAAGCAGGTGAGCGGCCCGGTCTATGTGGTAGAGGACAACTACTACGTCAAAGAGAACTCCATGGTCTATTTCGGGGCCAAGGGGGTGACGGTGGTGGGGGCGACCTGGACGCCGGATACCGCCCGCGAGCTGCACAAGCTCATTAAACGGGTCAGCAGCAAGCCGGTGCTGGAGGTGATCAACACCAACTACCACACCGATCGGGCGGGCGGTAACGCCTACTGGAAGTCCATCGGGGCCAAGGTGGTGGCGACGCGCCAGACCCGGGATCTGATGAAGAGCGACTGGGCCGAGATTGTCGCC…	WP_156853527.1	CphA_family_subclass_B2_metallo-beta-lactamase	MMKGWMKCGLAGAVVLMASFWGGSVRAAGISLKQVSGPVYVVEDNYYVKENSMVYFGAKGVTVVGATWTPDTARELHKLIKRVSSKPVLEVINTNYHTDRAGGNAYWKSIGAKVVATRQTRDLMKSDWAEIVAFTRKGLPEYPDLPLVLPNVVHDGDFKLQDGKVRAFYAGPAHTPDGIFVYFPDEQVLYGNCILKEKLGNLSFANVKEYPQTIERLKAMKLPIKTVIGGHDSPLHGPELIDHYEALIKAAPQS	ORF_OK	TRUE_HIT	mmkgwikcglagavvllasfwggsvraagislkqvsgpvyvvednyyvkensmvyfgakgvtvvgatwtpdtarelhklikrvsskpvlevintnyhtdraggnaywksigakvvatrqtrdlmksdwaeivaftrkglpeypdlplvlpnvvhdgdftlqegkvralyagpahtpdgifvyfpdeqvlygncilkeklgnlsfadvkaypktlerlkalklpiktvigghdsplhgpelidhyealikaaaks	MMKGWMKCGLAGAVVLMASFWGGSVRAAGISLKQVSGPVYVVEDNYYVKENSMVYFGAKGVTVVGATWTPDTARELHKLIKRVSSKPVLEVINTNYHTDRAGGNAYWKSIGAKVVATRQTRDLMKSDWAEIVAFTRKGLPEYPDLPLVLPNVVHDGDFKLQDGKVRAFYAGPAHTPDGIFVYFPDEQVLYGNCILKEKLGNLSFANVKEYPQTIERLKAMKLPIKTVIGGHDSPLHGPELIDHYEALIKAAPQS	1	254	99.6063	0	0	0	254	Cluster_4	ChpA_family_subclass_B2_metallo-beta-lactamase_ImiS_NG_050415.1_cds_WP_063865298.1_1	Cluster_4	SP_Sec_SPI_	27-28	SP_Sec_SPI_	27-28	N_Y_H_T_D	C	H	.	.
B2_1079	GCF_963888625.1	654	654	Aeromonas_veronii	Bacteria-Pseudomonadota-Gammaproteobacteria-Aeromonadales-Aeromonadaceae-Aeromonas-	4781662	NZ_CAWPJX010000036.1	class_B2	545	-	299283	300042	299281	300045	ATGATGAAAGGTTGGATGAAATGCGGGTTGGCCGGGGCCGTGGTGCTGATGGCGAGTTTCTGGGGGGGCAGCGTGCGGGCGGCGGGGATCGAACTCAAGCAGGTGAGCGGCCCAGTCTATGTGGTGGAGGACAACTACTACGTCAAAGAGAACTCCATGGTCTATTTCGGGGCCAAAGGGGTGACGGTGGTGGGGGCGACCTGGACGCCGGATACCGCCCGCGAGCTGCACAAGCTGATCAAACGGGTCAGCAGCAAGCCGGTGCTGGAGGTGATCAACACCAACTACCACACCGACCGGGCGGGCGGTAACGCCTACTGGAAGTCCATCGGGGCCAAGGTGGTGGCGACGCGCCAGACCCGGGATCTGATGAAGAGCGACTGGGCCGAGATTGTCGCC…	WP_081043470.1	CphA_family_subclass_B2_metallo-beta-lactamase	MMKGWMKCGLAGAVVLMASFWGGSVRAAGIELKQVSGPVYVVEDNYYVKENSMVYFGAKGVTVVGATWTPDTARELHKLIKRVSSKPVLEVINTNYHTDRAGGNAYWKSIGAKVVATRQTRDLMKSDWAEIVAFTRKGLPEYPDLPLVLPNVVHDGDFTLQEGKVRAFYAGPAHTPDGIFVYFPDEQVLYGNCILKEKLGNLSFANVKAYPQTIERLKAMKLPIKTVIGGHDSPLHGPELIDHYEELIKAAPQS	ORF_OK	TRUE_HIT	mmkgwikcglagavvllasfwggsvraagislkqvsgpvyvvednyyvkensmvyfgakgvtvvgatwtpdtarelhklikrvsskpvlevintnyhtdraggnaywksigakvvatrqtrdlmksdwaeivaftrkglpeypdlplvlpnvvhdgdftlqegkvralyagpahtpdgifvyfpdeqvlygncilkeklgnlsfadvkaypktlerlkalklpiktvigghdsplhgpelidhyealikaaaks	MMKGWMKCGLAGAVVLMASFWGGSVRAAGIELKQVSGPVYVVEDNYYVKENSMVYFGAKGVTVVGATWTPDTARELHKLIKRVSSKPVLEVINTNYHTDRAGGNAYWKSIGAKVVATRQTRDLMKSDWAEIVAFTRKGLPEYPDLPLVLPNVVHDGDFTLQEGKVRAFYAGPAHTPDGIFVYFPDEQVLYGNCILKEKLGNLSFANVKAYPQTIERLKAMKLPIKTVIGGHDSPLHGPELIDHYEELIKAAPQS	1	254	99.6063	0	0	0	254	Cluster_4	ChpA_family_subclass_B2_metallo-beta-lactamase_ImiS_NG_050415.1_cds_WP_063865298.1_1	Cluster_4	SP_Sec_SPI_	27-28	SP_Sec_SPI_	27-28	N_Y_H_T_D	C	H	.	.
B2_108	GCF_006246495.1	654	654	Aeromonas_veronii	Bacteria-Pseudomonadota-Gammaproteobacteria-Aeromonadales-Aeromonadaceae-Aeromonas-	4550968	NZ_NKXD01000010.1	class_B2	539.5	-	12461	13220	12459	13208	ATGAAGTGCACATTGGCCGGGGCCGTGGTGCTGATGGCGAGTTTCTGGGGTGGCAGCGTGCGGGCGGCTGGGATCGAACTCAAGCAGGTGAGTGGCCCTGTCTATGTGGTGGAGGACAACTACTACGTCAAAGAGAACTCCATGGTCTATTTCGGGGCCAAGGGGGTGACTGTGGTGGGGGCGACCTGGACGCCGGATACCGCCCGCGAGCTGCACAAGCTGATCAAACGGGTCAGCAGCAAGCCGGTGCTGGAGGTGATCAACACCAACTACCACACCGATCGGGCGGGCGGTAACGCCTACTGGAAGTCCATCGGGGCCAAGGTGGTGGCGACGCGCCAGACCCGGGATCTGATGAAGAGCGACTGGGCCGAGATTGTCGCCTTTACCCGCAAGGGT…	WP_240039951.1	CphA_family_subclass_B2_metallo-beta-lactamase	MKCTLAGAVVLMASFWGGSVRAAGIELKQVSGPVYVVEDNYYVKENSMVYFGAKGVTVVGATWTPDTARELHKLIKRVSSKPVLEVINTNYHTDRAGGNAYWKSIGAKVVATRQTRDLMKSDWAEIVAFTRKGLPEYPGLPQVLPNVVHDGDFTLQEGKVRAFFAGPAHTPDGIFVYFPDEQVLYGNCILKEKLGNLSFANVKEYPQTIERLKAMKLPIKTVIGGHDSPLHGPELIDHYEELIKAVPQS	ORF_OK	TRUE_HIT	mmkgwikcglagavvllasfwggsvraagislkqvsgpvyvvednyyvkensmvyfgakgvtvvgatwtpdtarelhklikrvsskpvlevintnyhtdraggnaywksigakvvatrqtrdlmksdwaeivaftrkglpeypdlplvlpnvvhdgdftlqegkvralyagpahtpdgifvyfpdeqvlygncilkeklgnlsfadvkaypktlerlkalklpiktvigghdsplhgpelidhyealikaaaks	MMKGWMKCTLAGAVVLMASFWGGSVRAAGIELKQVSGPVYVVEDNYYVKENSMVYFGAKGVTVVGATWTPDTARELHKLIKRVSSKPVLEVINTNYHTDRAGGNAYWKSIGAKVVATRQTRDLMKSDWAEIVAFTRKGLPEYPGLPQVLPNVVHDGDFTLQEGKVRAFFAGPAHTPDGIFVYFPDEQVLYGNCILKEKLGNLSFANVKEYPQTIERLKAMKLPIKTVIGGHDSPLHGPELIDHYEELIKAVPQS	1	254	99.6063	0	0	0	249	Cluster_4	ChpA_family_subclass_B2_metallo-beta-lactamase_ImiS_NG_050415.1_cds_WP_063865298.1_1	Cluster_4	SP_Sec_SPI_	22-23	SP_Sec_SPI_	22-23	N_Y_H_T_D	C	H	.	.
B2_1080	GCF_963888675.1	2560029	2560029	Aeromonas_sp_2692-1	Bacteria-Pseudomonadota-Gammaproteobacteria-Aeromonadales-Aeromonadaceae-Aeromonas-unclassified_Aeromonas-	5028423	NZ_CAWPKF010000001.1	class_B2	538.6	+	1662556	1663315	1662557	1663318	ATGAAAGGTTGGATGAAGTGCGGATTGGCCGGGGCCGTGGTGCTGATGGCGAGTTTCTGGGGTGGCAGCGTGCGGGCGGCGGGGATCTCCCTCAAGCAGGTGAGCGGCCCTGTCTATGTGGTGGAGGACAACTACTACGTCAAAGAGAACTCCATGGTCTATTTCGGGGCCAAGGGGGTGACGGTGGTGGGGGCAACCTGGACGCCGGATACCGCCCGCGAGCTGCACAAGCTGATAAAAAGAGTCAGCAGCAAGCCGGTGCTGGAGGTGATCAACACCAACTACCACACCGACCGGGCGGGCGGTAACGCCTACTGGAAGTCCATCGGTGCCAAGGTGGTGGCGACGAGCCAGACCCGGGATCTGATGAAGAGCGACTGGGCCGAGATCGTCGCCTTT…	WP_253265147.1	CphA_family_subclass_B2_metallo-beta-lactamase	MKGWMKCGLAGAVVLMASFWGGSVRAAGISLKQVSGPVYVVEDNYYVKENSMVYFGAKGVTVVGATWTPDTARELHKLIKRVSSKPVLEVINTNYHTDRAGGNAYWKSIGAKVVATSQTRDLMKSDWAEIVAFTRKGLPEYPDLPLVLPNVVHDGDFTLQEGKLRAFYAGPAHTPDGIFVYFPDEQVLYGNCILKEKLGNLSFADVKAYPQTLERLKAMKLPIKTVVGGHDSPLHGPELIDHYEALIKAAPQS	ORF_OK	TRUE_HIT	mmkgwikcglagavvllasfwggsvraagislkqvsgpvyvvednyyvkensmvyfgakgvtvvgatwtpdtarelhklikrvsskpvlevintnyhtdraggnaywksigakvvatrqtrdlmksdwaeivaftrkglpeypdlplvlpnvvhdgdftlqegkvralyagpahtpdgifvyfpdeqvlygncilkeklgnlsfadvkaypktlerlkalklpiktvigghdsplhgpelidhyealikaaaks	MMKGWMKCGLAGAVVLMASFWGGSVRAAGISLKQVSGPVYVVEDNYYVKENSMVYFGAKGVTVVGATWTPDTARELHKLIKRVSSKPVLEVINTNYHTDRAGGNAYWKSIGAKVVATSQTRDLMKSDWAEIVAFTRKGLPEYPDLPLVLPNVVHDGDFTLQEGKLRAFYAGPAHTPDGIFVYFPDEQVLYGNCILKEKLGNLSFADVKAYPQTLERLKAMKLPIKTVVGGHDSPLHGPELIDHYEALIKAAPQS	1	254	99.6063	0	0	0	253	Cluster_4	ChpA_family_subclass_B2_metallo-beta-lactamase_ImiS_NG_050415.1_cds_WP_063865298.1_1	Cluster_4	SP_Sec_SPI_	26-27	SP_Sec_SPI_	26-27	N_Y_H_T_D	C	H	.	.
B2_1081	GCF_963888745.1	2729335	2729335	Aeromonas_sp_DNRA1	Bacteria-Pseudomonadota-Gammaproteobacteria-Aeromonadales-Aeromonadaceae-Aeromonas-unclassified_Aeromonas-	4770609	NZ_CAWPKQ010000005.1	class_B2	538.1	+	436999	437758	437000	437761	ATGAAAGGTTGGATAAAGTGCGGATTGGCCGGGGCCCTGGTGCTGATGGCGAGTTTCTGGGGTGGCAGCGTGCGGGCGGCGGGGATGTCGCTGACACAGGTGAGCGGCCCCGTCTATGTGGTGGAGGACAACTACTACGTGCAGGAAAATTCCATGGTCTATTTCGGGGCCAAGGGAGTGACGGTGGTGGGGGCGACCTGGACGCCGGATACCGCCCGCGAGCTGCACAAGCTGATCAAACGGGTCAGCCGCAAGCCGGTGCTGGAGGTGATCAACACCAACTACCACACCGACCGGGCAGGCGGTAACGCCTACTGGAAGTCCATCGGCGCCAAGGTGGTATCGACCCGTCAGACCCGGGATCTGATGAAGAGCGACTGGGCCGAGATTGTCTCCTTT…	WP_248281019.1	CphA_family_subclass_B2_metallo-beta-lactamase	MKGWIKCGLAGALVLMASFWGGSVRAAGMSLTQVSGPVYVVEDNYYVQENSMVYFGAKGVTVVGATWTPDTARELHKLIKRVSRKPVLEVINTNYHTDRAGGNAYWKSIGAKVVSTRQTRDLMKSDWAEIVSFTRKGLPEYPDLPLVLPNVVHDGDFTLQEGKLRAFYAGPAHTPDGIFVYFPDEQVLYGNCILKEKLGNLSFANVKAYPQTIERLKAMKLPIKTVVGGHDSPLHGPELIDQYEALIKAAPQS	ORF_OK	TRUE_HIT	mmkgwikcglagavvllasfwggsvraagislkqvsgpvyvvednyyvkensmvyfgakgvtvvgatwtpdtarelhklikrvsskpvlevintnyhtdraggnaywksigakvvatrqtrdlmksdwaeivaftrkglpeypdlplvlpnvvhdgdftlqegkvralyagpahtpdgifvyfpdeqvlygncilkeklgnlsfadvkaypktlerlkalklpiktvigghdsplhgpelidhyealikaaaks	MMKGWIKCGLAGALVLMASFWGGSVRAAGMSLTQVSGPVYVVEDNYYVQENSMVYFGAKGVTVVGATWTPDTARELHKLIKRVSRKPVLEVINTNYHTDRAGGNAYWKSIGAKVVSTRQTRDLMKSDWAEIVSFTRKGLPEYPDLPLVLPNVVHDGDFTLQEGKLRAFYAGPAHTPDGIFVYFPDEQVLYGNCILKEKLGNLSFANVKAYPQTIERLKAMKLPIKTVVGGHDSPLHGPELIDQYEALIKAAPQS	1	254	99.6063	0	0	0	253	Cluster_4	ChpA_family_subclass_B2_metallo-beta-lactamase_ImiS_NG_050415.1_cds_WP_063865298.1_1	Cluster_4	SP_Sec_SPI_	26-27	SP_Sec_SPI_	26-27	N_Y_H_T_D	C	Q	.	.
B2_1082	GCF_963888895.1	654	654	Aeromonas_veronii	Bacteria-Pseudomonadota-Gammaproteobacteria-Aeromonadales-Aeromonadaceae-Aeromonas-	4642221	NZ_CAWPLY010000005.1	class_B2	544.2	+	274889	275648	274887	275651	ATGATGAAAGGTTGGATAAAGTGCGGGTTGGCCGGGGCCGTGGTGCTGATGGCGAGTTTCTGGGGCGGCAGCGTGCGGGCGGCGGGGATCTCCCTCAAGCAGGTGAGCGGCCCTGTCTATGTGGTGGAGGACAACTACTACGTCAAAGAGAACTCCATGGTCTATTTCGGGGCCAAGGGGGTGACTGTGGTGGGGGCGACCTGGACGCCGGATACCGCTCGCGAGCTGCATAAGCTCATTAAACGGGTCAGCAGCAAGCCGGTGCTGGAGGTGATCAACACCAACTACCACACCGACCGGGCGGGCGGTAACGCCTACTGGAAGTCCATCGGGGCCAAGGTGGTGGCGACGCGCCAGACCCGGGATCTGATGAAGAGCGACTGGGCCGAGATTGTCGCC…	WP_193860968.1	CphA_family_subclass_B2_metallo-beta-lactamase	MMKGWIKCGLAGAVVLMASFWGGSVRAAGISLKQVSGPVYVVEDNYYVKENSMVYFGAKGVTVVGATWTPDTARELHKLIKRVSSKPVLEVINTNYHTDRAGGNAYWKSIGAKVVATRQTRDLMKSDWAEIVAFTRKGLPEYPDLPLVLPNVVHDGDFKLQEGKVRAFYAGPAHTPDGIFVYFPDEQVLYGNCILKEKLGNLSFANVKEYPQTIERLKAMKLPIKTVIGGHDSPLHGPELIDHYEELIKAVPQS	ORF_OK	TRUE_HIT	mmkgwikcglagavvllasfwggsvraagislkqvsgpvyvvednyyvkensmvyfgakgvtvvgatwtpdtarelhklikrvsskpvlevintnyhtdraggnaywksigakvvatrqtrdlmksdwaeivaftrkglpeypdlplvlpnvvhdgdftlqegkvralyagpahtpdgifvyfpdeqvlygncilkeklgnlsfadvkaypktlerlkalklpiktvigghdsplhgpelidhyealikaaaks	MMKGWIKCGLAGAVVLMASFWGGSVRAAGISLKQVSGPVYVVEDNYYVKENSMVYFGAKGVTVVGATWTPDTARELHKLIKRVSSKPVLEVINTNYHTDRAGGNAYWKSIGAKVVATRQTRDLMKSDWAEIVAFTRKGLPEYPDLPLVLPNVVHDGDFKLQEGKVRAFYAGPAHTPDGIFVYFPDEQVLYGNCILKEKLGNLSFANVKEYPQTIERLKAMKLPIKTVIGGHDSPLHGPELIDHYEELIKAVPQS	1	254	99.6063	0	0	0	254	Cluster_4	ChpA_family_subclass_B2_metallo-beta-lactamase_ImiS_NG_050415.1_cds_WP_063865298.1_1	Cluster_4	SP_Sec_SPI_	27-28	SP_Sec_SPI_	27-28	N_Y_H_T_D	C	H	.	.
B2_1083	GCF_963888955.1	654	654	Aeromonas_veronii	Bacteria-Pseudomonadota-Gammaproteobacteria-Aeromonadales-Aeromonadaceae-Aeromonas-	4638526	NZ_CAWPMF010000009.1	class_B2	545.2	-	12607	13366	12605	13369	ATGATGAAAGGTTGGATAAAGTGCGGGTTGGCCGGGGCCGTGGTGCTGATGGCGAGTTTCTGGGGCGGCAGCGTGCGGGCGGCGGGGATCTCCCTCAAGCAGGTGAGCGGCCCTGTCTATGTGGTGGAGGACAACTACTACGTCAAAGAGAACTCCATGGTCTATTTCGGGGCCAAGGGGGTGACTGTGGTGGGGGCGACCTGGACGCCGGATACCGCTCGCGAGCTGCATAAGCTCATTAAACGGGTCAGCAGCAAGCCGGTGCTGGAGGTGATCAACACCAACTACCACACCGACCGGGCGGGCGGTAACGCCTACTGGAAGTCCATCGGGGCCAAGGTGGTGGCGACGCGCCAGACCCGGGATCTGATGAAGAGCGACTGGGCCGAGATTGTCGCC…	WP_193860968.1	CphA_family_subclass_B2_metallo-beta-lactamase	MMKGWIKCGLAGAVVLMASFWGGSVRAAGISLKQVSGPVYVVEDNYYVKENSMVYFGAKGVTVVGATWTPDTARELHKLIKRVSSKPVLEVINTNYHTDRAGGNAYWKSIGAKVVATRQTRDLMKSDWAEIVAFTRKGLPEYPDLPLVLPNVVHDGDFKLQEGKVRAFYAGPAHTPDGIFVYFPDEQVLYGNCILKEKLGNLSFANVKEYPQTIERLKAMKLPIKTVIGGHDSPLHGPELIDHYEELIKAVPQS	ORF_OK	TRUE_HIT	mmkgwikcglagavvllasfwggsvraagislkqvsgpvyvvednyyvkensmvyfgakgvtvvgatwtpdtarelhklikrvsskpvlevintnyhtdraggnaywksigakvvatrqtrdlmksdwaeivaftrkglpeypdlplvlpnvvhdgdftlqegkvralyagpahtpdgifvyfpdeqvlygncilkeklgnlsfadvkaypktlerlkalklpiktvigghdsplhgpelidhyealikaaaks	MMKGWIKCGLAGAVVLMASFWGGSVRAAGISLKQVSGPVYVVEDNYYVKENSMVYFGAKGVTVVGATWTPDTARELHKLIKRVSSKPVLEVINTNYHTDRAGGNAYWKSIGAKVVATRQTRDLMKSDWAEIVAFTRKGLPEYPDLPLVLPNVVHDGDFKLQEGKVRAFYAGPAHTPDGIFVYFPDEQVLYGNCILKEKLGNLSFANVKEYPQTIERLKAMKLPIKTVIGGHDSPLHGPELIDHYEELIKAVPQS	1	254	99.6063	0	0	0	254	Cluster_4	ChpA_family_subclass_B2_metallo-beta-lactamase_ImiS_NG_050415.1_cds_WP_063865298.1_1	Cluster_4	SP_Sec_SPI_	27-28	SP_Sec_SPI_	27-28	N_Y_H_T_D	C	H	.	.
B2_1084	GCF_963889085.1	654	654	Aeromonas_veronii	Bacteria-Pseudomonadota-Gammaproteobacteria-Aeromonadales-Aeromonadaceae-Aeromonas-	4765708	NZ_CAWPLW010000014.1	class_B2	545.2	-	12607	13366	12605	13366	ATGAAAGGTTGGATAAAGTGCGGGTTGGCCGGGGCCGTGGTGCTGATGGCGAGTTTCTGGGGCGGCAGCGTGCGGGCGGCGGGGATCTCCCTCAAGCAGGTGAGCGGCCCTGTCTATGTGGTGGAGGACAACTACTACGTCAAAGAGAACTCCATGGTCTATTTCGGGGCCAAGGGGGTGACTGTGGTGGGGGCGACCTGGACGCCGGATACCGCTCGCGAGCTGCATAAGCTCATTAAACGGGTCAGCAGCAAGCCGGTGCTGGAGGTGATCAACACCAACTACCACACCGACCGGGCGGGCGGTAACGCCTACTGGAAGTCCATCGGGGCCAAGGTGGTGGCGACGCGCCAGACCCGGGATCTGATGAAGAGCGACTGGGCCGAGATTGTCGCCTTT…	WP_228036026.1	CphA_family_subclass_B2_metallo-beta-lactamase	MKGWIKCGLAGAVVLMASFWGGSVRAAGISLKQVSGPVYVVEDNYYVKENSMVYFGAKGVTVVGATWTPDTARELHKLIKRVSSKPVLEVINTNYHTDRAGGNAYWKSIGAKVVATRQTRDLMKSDWAEIVAFTRKGLPEYPDLPLVLPNVVHDGDFKLQEGKVRAFYAGPAHTPDGIFVYFPDEQVLYGNCILKEKLGNLSFANVKEYPQTIERLKAMKLPIKTVIGGHDSPLHGPELIDHYEELIKAVPQS	ORF_OK	TRUE_HIT	mmkgwikcglagavvllasfwggsvraagislkqvsgpvyvvednyyvkensmvyfgakgvtvvgatwtpdtarelhklikrvsskpvlevintnyhtdraggnaywksigakvvatrqtrdlmksdwaeivaftrkglpeypdlplvlpnvvhdgdftlqegkvralyagpahtpdgifvyfpdeqvlygncilkeklgnlsfadvkaypktlerlkalklpiktvigghdsplhgpelidhyealikaaaks	MMKGWIKCGLAGAVVLMASFWGGSVRAAGISLKQVSGPVYVVEDNYYVKENSMVYFGAKGVTVVGATWTPDTARELHKLIKRVSSKPVLEVINTNYHTDRAGGNAYWKSIGAKVVATRQTRDLMKSDWAEIVAFTRKGLPEYPDLPLVLPNVVHDGDFKLQEGKVRAFYAGPAHTPDGIFVYFPDEQVLYGNCILKEKLGNLSFANVKEYPQTIERLKAMKLPIKTVIGGHDSPLHGPELIDHYEELIKAVPQS	1	254	99.6063	0	0	0	253	Cluster_4	ChpA_family_subclass_B2_metallo-beta-lactamase_ImiS_NG_050415.1_cds_WP_063865298.1_1	Cluster_4	SP_Sec_SPI_	26-27	SP_Sec_SPI_	26-27	N_Y_H_T_D	C	H	.	.
B2_1085	GCF_963889605.1	654	654	Aeromonas_veronii	Bacteria-Pseudomonadota-Gammaproteobacteria-Aeromonadales-Aeromonadaceae-Aeromonas-	4670223	NZ_CAWPNI010000015.1	class_B2	545.2	-	12607	13366	12605	13366	ATGAAAGGTTGGATAAAGTGCGGGTTGGCCGGGGCCGTGGTGCTGATGGCGAGTTTCTGGGGCGGCAGCGTGCGGGCGGCGGGGATCTCCCTCAAGCAGGTGAGCGGCCCTGTCTATGTGGTGGAGGACAACTACTACGTCAAAGAGAACTCCATGGTCTATTTCGGGGCCAAGGGGGTGACTGTGGTGGGGGCGACCTGGACGCCGGATACCGCTCGCGAGCTGCATAAGCTCATTAAACGGGTCAGCAGCAAGCCGGTGCTGGAGGTGATCAACACCAACTACCACACCGACCGGGCGGGCGGTAACGCCTACTGGAAGTCCATCGGGGCCAAGGTGGTGGCGACGCGCCAGACCCGGGATCTGATGAAGAGCGACTGGGCCGAGATTGTCGCCTTT…	WP_228036026.1	CphA_family_subclass_B2_metallo-beta-lactamase	MKGWIKCGLAGAVVLMASFWGGSVRAAGISLKQVSGPVYVVEDNYYVKENSMVYFGAKGVTVVGATWTPDTARELHKLIKRVSSKPVLEVINTNYHTDRAGGNAYWKSIGAKVVATRQTRDLMKSDWAEIVAFTRKGLPEYPDLPLVLPNVVHDGDFKLQEGKVRAFYAGPAHTPDGIFVYFPDEQVLYGNCILKEKLGNLSFANVKEYPQTIERLKAMKLPIKTVIGGHDSPLHGPELIDHYEELIKAVPQS	ORF_OK	TRUE_HIT	mmkgwikcglagavvllasfwggsvraagislkqvsgpvyvvednyyvkensmvyfgakgvtvvgatwtpdtarelhklikrvsskpvlevintnyhtdraggnaywksigakvvatrqtrdlmksdwaeivaftrkglpeypdlplvlpnvvhdgdftlqegkvralyagpahtpdgifvyfpdeqvlygncilkeklgnlsfadvkaypktlerlkalklpiktvigghdsplhgpelidhyealikaaaks	MMKGWIKCGLAGAVVLMASFWGGSVRAAGISLKQVSGPVYVVEDNYYVKENSMVYFGAKGVTVVGATWTPDTARELHKLIKRVSSKPVLEVINTNYHTDRAGGNAYWKSIGAKVVATRQTRDLMKSDWAEIVAFTRKGLPEYPDLPLVLPNVVHDGDFKLQEGKVRAFYAGPAHTPDGIFVYFPDEQVLYGNCILKEKLGNLSFANVKEYPQTIERLKAMKLPIKTVIGGHDSPLHGPELIDHYEELIKAVPQS	1	254	99.6063	0	0	0	253	Cluster_4	ChpA_family_subclass_B2_metallo-beta-lactamase_ImiS_NG_050415.1_cds_WP_063865298.1_1	Cluster_4	SP_Sec_SPI_	26-27	SP_Sec_SPI_	26-27	N_Y_H_T_D	C	H	.	.
B2_1086	GCF_963890375.1	654	654	Aeromonas_veronii	Bacteria-Pseudomonadota-Gammaproteobacteria-Aeromonadales-Aeromonadaceae-Aeromonas-	4636902	NZ_CAWPRK010000009.1	class_B2	545.2	-	12607	13366	12605	13369	ATGATGAAAGGTTGGATAAAGTGCGGGTTGGCCGGGGCCGTGGTGCTGATGGCGAGTTTCTGGGGCGGCAGCGTGCGGGCGGCGGGGATCTCCCTCAAGCAGGTGAGCGGCCCTGTCTATGTGGTGGAGGACAACTACTACGTCAAAGAGAACTCCATGGTCTATTTCGGGGCCAAGGGGGTGACTGTGGTGGGGGCGACCTGGACGCCGGATACCGCTCGCGAGCTGCATAAGCTCATTAAACGGGTCAGCAGCAAGCCGGTGCTGGAGGTGATCAACACCAACTACCACACCGACCGGGCGGGCGGTAACGCCTACTGGAAGTCCATCGGGGCCAAGGTGGTGGCGACGCGCCAGACCCGGGATCTGATGAAGAGCGACTGGGCCGAGATTGTCGCC…	WP_193860968.1	CphA_family_subclass_B2_metallo-beta-lactamase	MMKGWIKCGLAGAVVLMASFWGGSVRAAGISLKQVSGPVYVVEDNYYVKENSMVYFGAKGVTVVGATWTPDTARELHKLIKRVSSKPVLEVINTNYHTDRAGGNAYWKSIGAKVVATRQTRDLMKSDWAEIVAFTRKGLPEYPDLPLVLPNVVHDGDFKLQEGKVRAFYAGPAHTPDGIFVYFPDEQVLYGNCILKEKLGNLSFANVKEYPQTIERLKAMKLPIKTVIGGHDSPLHGPELIDHYEELIKAVPQS	ORF_OK	TRUE_HIT	mmkgwikcglagavvllasfwggsvraagislkqvsgpvyvvednyyvkensmvyfgakgvtvvgatwtpdtarelhklikrvsskpvlevintnyhtdraggnaywksigakvvatrqtrdlmksdwaeivaftrkglpeypdlplvlpnvvhdgdftlqegkvralyagpahtpdgifvyfpdeqvlygncilkeklgnlsfadvkaypktlerlkalklpiktvigghdsplhgpelidhyealikaaaks	MMKGWIKCGLAGAVVLMASFWGGSVRAAGISLKQVSGPVYVVEDNYYVKENSMVYFGAKGVTVVGATWTPDTARELHKLIKRVSSKPVLEVINTNYHTDRAGGNAYWKSIGAKVVATRQTRDLMKSDWAEIVAFTRKGLPEYPDLPLVLPNVVHDGDFKLQEGKVRAFYAGPAHTPDGIFVYFPDEQVLYGNCILKEKLGNLSFANVKEYPQTIERLKAMKLPIKTVIGGHDSPLHGPELIDHYEELIKAVPQS	1	254	99.6063	0	0	0	254	Cluster_4	ChpA_family_subclass_B2_metallo-beta-lactamase_ImiS_NG_050415.1_cds_WP_063865298.1_1	Cluster_4	SP_Sec_SPI_	27-28	SP_Sec_SPI_	27-28	N_Y_H_T_D	C	H	.	.
B2_1087	GCF_963890675.1	650	650	Aeromonas_jandaei	Bacteria-Pseudomonadota-Gammaproteobacteria-Aeromonadales-Aeromonadaceae-Aeromonas-	4503482	NZ_CAWPSN010000010.1	class_B2	544	-	9629	10388	9627	10391	ATGATGAAAGGTTGGATGAAATGCGGGTTGGCCGGGGCCGTGGTGCTGATGGCGAGTTTCTGGGGTGGCAGCGTGCGGGCGGCGGGGATCTCCCTCAAGCAGGTGAGTGGCCCTGTCTATGTTGTTGAAGACAACTACTACGTCAAAGAGAACTCCATGGTCTATTTCGGGGCCAAGGGGGTGACGGTAGTGGGGGCGACCTGGACGCCGGATACCGCTCGCGAGCTGCACAAGCTCATTAAACGGGTCAGCAGCAAGCCGGTGCTGGAGGTGATCAACACCAACTACCACACCGATCGGGCGGGCGGTAACGCCTACTGGAAGTCCATCGGGGCCAAGGTGGTGGCGACCCGCCAGACCCGGGATCTGATGAAGAGCGACTGGGCCGGGATTGTCGCC…	WP_201967681.1	CphA_family_subclass_B2_metallo-beta-lactamase	MMKGWMKCGLAGAVVLMASFWGGSVRAAGISLKQVSGPVYVVEDNYYVKENSMVYFGAKGVTVVGATWTPDTARELHKLIKRVSSKPVLEVINTNYHTDRAGGNAYWKSIGAKVVATRQTRDLMKSDWAGIVAFTRKGLPEYPDLPLVLPNVVHDGDFKLQDGKVRAFYAGPAHTPDGIFVYFPDEQVLYGNCILKEKLGNLSFANVKEYPQTIERLKAMKLPIKTVIGGHDSPLHGPELIDHYEALIKAAPQS	ORF_OK	TRUE_HIT	mmkgwikcglagavvllasfwggsvraagislkqvsgpvyvvednyyvkensmvyfgakgvtvvgatwtpdtarelhklikrvsskpvlevintnyhtdraggnaywksigakvvatrqtrdlmksdwaeivaftrkglpeypdlplvlpnvvhdgdftlqegkvralyagpahtpdgifvyfpdeqvlygncilkeklgnlsfadvkaypktlerlkalklpiktvigghdsplhgpelidhyealikaaaks	MMKGWMKCGLAGAVVLMASFWGGSVRAAGISLKQVSGPVYVVEDNYYVKENSMVYFGAKGVTVVGATWTPDTARELHKLIKRVSSKPVLEVINTNYHTDRAGGNAYWKSIGAKVVATRQTRDLMKSDWAGIVAFTRKGLPEYPDLPLVLPNVVHDGDFKLQDGKVRAFYAGPAHTPDGIFVYFPDEQVLYGNCILKEKLGNLSFANVKEYPQTIERLKAMKLPIKTVIGGHDSPLHGPELIDHYEALIKAAPQS	1	254	99.6063	0	0	0	254	Cluster_4	ChpA_family_subclass_B2_metallo-beta-lactamase_ImiS_NG_050415.1_cds_WP_063865298.1_1	Cluster_4	SP_Sec_SPI_	27-28	SP_Sec_SPI_	27-28	N_Y_H_T_D	C	H	.	.
B2_1088	GCF_963890775.1	196024	196024	Aeromonas_dhakensis	Bacteria-Pseudomonadota-Gammaproteobacteria-Aeromonadales-Aeromonadaceae-Aeromonas-	4884279	NZ_CAWPSX010000001.1	class_B2	537.9	+	482782	483541	482783	483544	ATGAAAGGTTGGATAAAGTGCGGGCTGGCCGGGGCCCTGGTGCTGATGGCAAGTTTCTGGGGTGGCAGCGTGCGGGCGGCGGGGATGTCGCTGACGCAGGTGAGCGGCCCCGTCTACGTGGTAGAGGACAACTACTACGTGCAGGAAAACTCCATGGTCTATTTCGGGGCCAAGGGGGTGACGGTGGTGGGGGCGACCTGGACGCCGGATACCGCCCGCGAGCTGCACAAGCTGATCAAACGGGTCAGCCGCCAGCCGGTGCTGGAGGTGATCAACACCAACTACCACACCGACCGGGCAGGCGGTAACGCCTACTGGAAGTCCATCGGCGCCAAGGTGGTATCGACCCGCCAGACCCGGGATCTGATGAAGAGCGACTGGGCCGAGATTGTCGCCTTT…	WP_232535675.1	CphA_family_subclass_B2_metallo-beta-lactamase	MKGWIKCGLAGALVLMASFWGGSVRAAGMSLTQVSGPVYVVEDNYYVQENSMVYFGAKGVTVVGATWTPDTARELHKLIKRVSRQPVLEVINTNYHTDRAGGNAYWKSIGAKVVSTRQTRDLMKSDWAEIVAFTRKGLPEYPDLPLVLPNVVHDGDFMLQEGKLRAFYAGPAHTPDGIFVYFPDEQVLYGNCILKEKLGNLSFADVKAYPQTLERLKAMKLPIKTVVGGHDSPLHGPELIDHYEALIKAAPQS	ORF_OK	TRUE_HIT	mmkgwikcglagavvllasfwggsvraagislkqvsgpvyvvednyyvkensmvyfgakgvtvvgatwtpdtarelhklikrvsskpvlevintnyhtdraggnaywksigakvvatrqtrdlmksdwaeivaftrkglpeypdlplvlpnvvhdgdftlqegkvralyagpahtpdgifvyfpdeqvlygncilkeklgnlsfadvkaypktlerlkalklpiktvigghdsplhgpelidhyealikaaaks	MMKGWIKCGLAGALVLMASFWGGSVRAAGMSLTQVSGPVYVVEDNYYVQENSMVYFGAKGVTVVGATWTPDTARELHKLIKRVSRQPVLEVINTNYHTDRAGGNAYWKSIGAKVVSTRQTRDLMKSDWAEIVAFTRKGLPEYPDLPLVLPNVVHDGDFMLQEGKLRAFYAGPAHTPDGIFVYFPDEQVLYGNCILKEKLGNLSFADVKAYPQTLERLKAMKLPIKTVVGGHDSPLHGPELIDHYEALIKAAPQS	1	254	99.6063	0	0	0	253	Cluster_4	ChpA_family_subclass_B2_metallo-beta-lactamase_ImiS_NG_050415.1_cds_WP_063865298.1_1	Cluster_4	SP_Sec_SPI_	26-27	SP_Sec_SPI_	26-27	N_Y_H_T_D	C	H	.	.
B2_1089	GCF_963890855.1	196024	196024	Aeromonas_dhakensis	Bacteria-Pseudomonadota-Gammaproteobacteria-Aeromonadales-Aeromonadaceae-Aeromonas-	4756286	NZ_CAWPSW010000017.1	class_B2	543.4	-	15438	16197	15436	16197	ATGAAAGGTTGGATAAAGTGCGGGCTGGCCGGCGCCGTGGTGCTGGTGGCGAGCTTCTGGGGTGGCAGCGTGCGGGCGGCGGGGATGTCGCTGACGCAAGTGAGCGGCCCTGTCTATGTGGTCGAGGACAACTACTACATACAGGAAAACTCCATGGTCTATTTCGGGGCCAAGGGGGTGACGGTAGTGGGGGCGACCTGGACGCCAGATACCGCCCGTGAGCTGCACAAGCTGATCAAACGGGTCAGTCGCCAGCCGGTGCTGGAGGTGATCAACACCAACTACCACACCGATCGGGCGGGCGGTAACGCCTACTGGAAGTCCATCGGGGCCAAGGTGGTATCGACCCGCCAGACCCGGGATCTGATGAAGAGCGACTGGGCCGAGATTGTCGCCTTT…	WP_236665263.1	CphA_family_subclass_B2_metallo-beta-lactamase	MKGWIKCGLAGAVVLVASFWGGSVRAAGMSLTQVSGPVYVVEDNYYIQENSMVYFGAKGVTVVGATWTPDTARELHKLIKRVSRQPVLEVINTNYHTDRAGGNAYWKSIGAKVVSTRQTRDLMKSDWAEIVAFTRKGLPEYPDLPLVLPNVVHDGDFTLQEGKLRAFYAGPAHTPDGIFVYFPDQQVLYGNCILKEKLGNLSFADVKAYPQTLERLKAMKLPIKTVVGGHDSPLHGPELIDHYEALIKAAPQS	ORF_OK	TRUE_HIT	mmkgwikcglagavvllasfwggsvraagislkqvsgpvyvvednyyvkensmvyfgakgvtvvgatwtpdtarelhklikrvsskpvlevintnyhtdraggnaywksigakvvatrqtrdlmksdwaeivaftrkglpeypdlplvlpnvvhdgdftlqegkvralyagpahtpdgifvyfpdeqvlygncilkeklgnlsfadvkaypktlerlkalklpiktvigghdsplhgpelidhyealikaaaks	MMKGWIKCGLAGAVVLVASFWGGSVRAAGMSLTQVSGPVYVVEDNYYIQENSMVYFGAKGVTVVGATWTPDTARELHKLIKRVSRQPVLEVINTNYHTDRAGGNAYWKSIGAKVVSTRQTRDLMKSDWAEIVAFTRKGLPEYPDLPLVLPNVVHDGDFTLQEGKLRAFYAGPAHTPDGIFVYFPDQQVLYGNCILKEKLGNLSFADVKAYPQTLERLKAMKLPIKTVVGGHDSPLHGPELIDHYEALIKAAPQS	1	254	99.6063	0	0	0	253	Cluster_4	ChpA_family_subclass_B2_metallo-beta-lactamase_ImiS_NG_050415.1_cds_WP_063865298.1_1	Cluster_4	SP_Sec_SPI_	26-27	SP_Sec_SPI_	26-27	N_Y_H_T_D	C	H	.	.
B2_109	GCF_006246515.1	654	654	Aeromonas_veronii	Bacteria-Pseudomonadota-Gammaproteobacteria-Aeromonadales-Aeromonadaceae-Aeromonas-	4414981	NZ_NKXF01000018.1	class_B2	545.1	-	12280	13039	12278	13042	ATGATGAAAGGTTGGATGAAGTGCACATTGGCCGGAGCCGTGGTGCTGATGGCGAGTTTCTGGGGTGGCAGCGTGCGGGCGGCGGGGATCGAGCTCAAGCAGGTGAGCGGCCCTGTCTATGTGGTGGAGGACAACTACTACGTCAAAGAGAACTCCATGGTCTATTTCGGGGCCAAGGGGGTGACGGTGGTGGGGGCGACCTGGACGCCGGATACCGCCCGCGAGCTGCACAAGCTGATCAAACGGGTCAGCAGCAAGCCGGTGCTGGAGGTGATCAACACCAACTACCACACCGATCGGGCGGGCGGTAACGCCTACTGGAAGTCCATTGGGGCCAAGGTGGTGGCGACGCGCCAGACCCGGGATCTGATGAAGAGCGACTGGGCCGAGATTGTCGCC…	WP_082187683.1	CphA_family_subclass_B2_metallo-beta-lactamase	MMKGWMKCTLAGAVVLMASFWGGSVRAAGIELKQVSGPVYVVEDNYYVKENSMVYFGAKGVTVVGATWTPDTARELHKLIKRVSSKPVLEVINTNYHTDRAGGNAYWKSIGAKVVATRQTRDLMKSDWAEIVAFTRKGLPEYPDLPLVLPNVVHDGDFTLQEGKVRAFYAGPAHTPDGIFVYFPDEQVLYGNCILKEKLGNLSFANVKAYPQTIERLKAMKLPIKTVIGGHDSPLHGPELIDHYEELIKAVPQS	ORF_OK	TRUE_HIT	mmkgwikcglagavvllasfwggsvraagislkqvsgpvyvvednyyvkensmvyfgakgvtvvgatwtpdtarelhklikrvsskpvlevintnyhtdraggnaywksigakvvatrqtrdlmksdwaeivaftrkglpeypdlplvlpnvvhdgdftlqegkvralyagpahtpdgifvyfpdeqvlygncilkeklgnlsfadvkaypktlerlkalklpiktvigghdsplhgpelidhyealikaaaks	MMKGWMKCTLAGAVVLMASFWGGSVRAAGIELKQVSGPVYVVEDNYYVKENSMVYFGAKGVTVVGATWTPDTARELHKLIKRVSSKPVLEVINTNYHTDRAGGNAYWKSIGAKVVATRQTRDLMKSDWAEIVAFTRKGLPEYPDLPLVLPNVVHDGDFTLQEGKVRAFYAGPAHTPDGIFVYFPDEQVLYGNCILKEKLGNLSFANVKAYPQTIERLKAMKLPIKTVIGGHDSPLHGPELIDHYEELIKAVPQS	1	254	99.6063	0	0	0	254	Cluster_4	ChpA_family_subclass_B2_metallo-beta-lactamase_ImiS_NG_050415.1_cds_WP_063865298.1_1	Cluster_4	SP_Sec_SPI_	27-28	SP_Sec_SPI_	27-28	N_Y_H_T_D	C	H	.	.
B2_1090	GCF_963890875.1	654	654	Aeromonas_veronii	Bacteria-Pseudomonadota-Gammaproteobacteria-Aeromonadales-Aeromonadaceae-Aeromonas-	4600972	NZ_CAWPSU010000011.1	class_B2	544.6	+	128268	129027	128266	129030	ATGATGAAAGGTTGGATGAAGTGCACATTGGCCGGGGCCCTGGTGCTGATGGCGAGTTTCTGGGGTGGCAGCGTGCGGGCGGCGGGGATCTCCCTCAAGCAGGTGAGTGGCCCTGTTTACGTGGTTGAAGATAACTACTACGTAAAGGAAAACTCCATGGTCTATTTCGGGGCCAAGGGGGTGACTGTGGTGGGGGCGACCTGGACGCCGGATACCGCCCGCGAGCTGCACAAGCTCATTAAACGGGTCAGCAGCAAGCCGGTGCTGGAGGTGATCAACACCAACTACCACACCGACCGGGCGGGCGGTAACGCCTACTGGAAGTCCATCGGGGCCAAGGTGGTGGCGACCCGCCAGACCCGGGATCTGATGAAGAGCGACTGGGCCGAGATTGTCGCC…	WP_201958379.1	CphA_family_subclass_B2_metallo-beta-lactamase	MMKGWMKCTLAGALVLMASFWGGSVRAAGISLKQVSGPVYVVEDNYYVKENSMVYFGAKGVTVVGATWTPDTARELHKLIKRVSSKPVLEVINTNYHTDRAGGNAYWKSIGAKVVATRQTRDLMKSDWAEIVAFTRKGLPEYPDLPLVLPNVVHDGDFTLQEGKVRAFYAGPAHTPDGIFVYFPDEQVLYGNCILKEKLGNLSFANVKAYPQTIERLKAMKLPIKTVIGGHDSPLHGPELIDHYEELIKAVPQS	ORF_OK	TRUE_HIT	mmkgwikcglagavvllasfwggsvraagislkqvsgpvyvvednyyvkensmvyfgakgvtvvgatwtpdtarelhklikrvsskpvlevintnyhtdraggnaywksigakvvatrqtrdlmksdwaeivaftrkglpeypdlplvlpnvvhdgdftlqegkvralyagpahtpdgifvyfpdeqvlygncilkeklgnlsfadvkaypktlerlkalklpiktvigghdsplhgpelidhyealikaaaks	MMKGWMKCTLAGALVLMASFWGGSVRAAGISLKQVSGPVYVVEDNYYVKENSMVYFGAKGVTVVGATWTPDTARELHKLIKRVSSKPVLEVINTNYHTDRAGGNAYWKSIGAKVVATRQTRDLMKSDWAEIVAFTRKGLPEYPDLPLVLPNVVHDGDFTLQEGKVRAFYAGPAHTPDGIFVYFPDEQVLYGNCILKEKLGNLSFANVKAYPQTIERLKAMKLPIKTVIGGHDSPLHGPELIDHYEELIKAVPQS	1	254	99.6063	0	0	0	254	Cluster_4	ChpA_family_subclass_B2_metallo-beta-lactamase_ImiS_NG_050415.1_cds_WP_063865298.1_1	Cluster_4	SP_Sec_SPI_	27-28	SP_Sec_SPI_	27-28	N_Y_H_T_D	C	H	.	.
B2_1091	GCF_963890895.1	650	650	Aeromonas_jandaei	Bacteria-Pseudomonadota-Gammaproteobacteria-Aeromonadales-Aeromonadaceae-Aeromonas-	4687071	NZ_CAWPSV010000002.1	class_B2	542.5	+	126489	127248	126490	127251	ATGAAAGGTTGGATGAAGTGCGGGTTGGCCGGGGCCGTGGTGCTGATGGCGAGTTTCTGGGGTGGCAGCGTGCGGGCGGCGGGGATCTCCCTCAAGCAGGTGAGCGGCCCGGTCTATGTGGTGGAGGACAACTACTACGTCAAAGAGAACTCCATGGTCTATTTCGGGGCCAAGGGAGTGACTGTGGTGGGGGCGACCTGGACGCCGGATACCGCACGCGAGTTGCACAAGCTGATCAAACGGGTCAGCAGCAAGCCGGTGCTGGAGGTGATCAACACCAACTACCACACCGACCGGGCGGGCGGTAACGCCTACTGGAAGTCCATCGGGGCCAAGGTGGTGGCGACGCGCCAGACCCGGGATCTGATGAAGAGCGACTGGGCCGAGATTGTCGCCTTT…	WP_236663748.1	CphA_family_subclass_B2_metallo-beta-lactamase	MKGWMKCGLAGAVVLMASFWGGSVRAAGISLKQVSGPVYVVEDNYYVKENSMVYFGAKGVTVVGATWTPDTARELHKLIKRVSSKPVLEVINTNYHTDRAGGNAYWKSIGAKVVATRQTRDLMKSDWAEIVAFTRKGLPEYPDLPLVLPNVVHDGDFKLQDGKVRAFYAGPAHTPDGIFVYFPDEQVLYGNCILKEKLGNLSFANVKAYPQTIERLKAMKLPIKTVIGGHDSPLHGPELIEHYEELIKAVPQS	ORF_OK	TRUE_HIT	mmkgwikcglagavvllasfwggsvraagislkqvsgpvyvvednyyvkensmvyfgakgvtvvgatwtpdtarelhklikrvsskpvlevintnyhtdraggnaywksigakvvatrqtrdlmksdwaeivaftrkglpeypdlplvlpnvvhdgdftlqegkvralyagpahtpdgifvyfpdeqvlygncilkeklgnlsfadvkaypktlerlkalklpiktvigghdsplhgpelidhyealikaaaks	MMKGWMKCGLAGAVVLMASFWGGSVRAAGISLKQVSGPVYVVEDNYYVKENSMVYFGAKGVTVVGATWTPDTARELHKLIKRVSSKPVLEVINTNYHTDRAGGNAYWKSIGAKVVATRQTRDLMKSDWAEIVAFTRKGLPEYPDLPLVLPNVVHDGDFKLQDGKVRAFYAGPAHTPDGIFVYFPDEQVLYGNCILKEKLGNLSFANVKAYPQTIERLKAMKLPIKTVIGGHDSPLHGPELIEHYEELIKAVPQS	1	254	99.6063	0	0	0	253	Cluster_4	ChpA_family_subclass_B2_metallo-beta-lactamase_ImiS_NG_050415.1_cds_WP_063865298.1_1	Cluster_4	SP_Sec_SPI_	26-27	SP_Sec_SPI_	26-27	N_Y_H_T_D	C	H	.	.
B2_1092	GCF_963890915.1	196024	196024	Aeromonas_dhakensis	Bacteria-Pseudomonadota-Gammaproteobacteria-Aeromonadales-Aeromonadaceae-Aeromonas-	4723039	NZ_CAWPSS010000017.1	class_B2	538.9	+	444383	445142	444384	445145	ATGAAAGGTTGGATAAAGTGCGGGCTGGCCGGCGCCCTGATGCTGATGGCGAGTTTCTGGGGTGGCAGCGTGCGGGCGGCGGGGATGTCGCTGACGCAGGTGAGCGGCCCTGTCTACGTTGTCGAAGATAACTACTACATACAGGAAAACTCCATGGTCTATTTCGGGGCCAAGGGGGTGACTGTGGTGGGGGCGACCTGGACGCCGGATACCGCCCGCGAGCTGCACAAGCTGATCAAACGGGTCAGCCGCAAGCCGGTGCTGGAGGTGATCAACACCAACTACCACACCGACCGGGCGGGCGGTAACGCCTATTGGAAGTCCATCGGGGCCAAGGTGGTATCGACCCGCCAGACCCGGGATCTGATGAAGAGCGACTGGGCCGAGATTGTCGCCTTT…	WP_236664673.1	CphA_family_subclass_B2_metallo-beta-lactamase	MKGWIKCGLAGALMLMASFWGGSVRAAGMSLTQVSGPVYVVEDNYYIQENSMVYFGAKGVTVVGATWTPDTARELHKLIKRVSRKPVLEVINTNYHTDRAGGNAYWKSIGAKVVSTRQTRDLMKSDWAEIVAFTRKGLPEYPDLPLVLPNVVHDGDFTLQEGKLRAFYAGPAHTPDGIFVYFPDEQVLYGNCIIKEKLGNLSFADVKAYPQTLERLKAMKLPIKTVVGGHDSPLHGPELIDHYEALIKAAPQS	ORF_OK	TRUE_HIT	mmkgwikcglagavvllasfwggsvraagislkqvsgpvyvvednyyvkensmvyfgakgvtvvgatwtpdtarelhklikrvsskpvlevintnyhtdraggnaywksigakvvatrqtrdlmksdwaeivaftrkglpeypdlplvlpnvvhdgdftlqegkvralyagpahtpdgifvyfpdeqvlygncilkeklgnlsfadvkaypktlerlkalklpiktvigghdsplhgpelidhyealikaaaks	MMKGWIKCGLAGALMLMASFWGGSVRAAGMSLTQVSGPVYVVEDNYYIQENSMVYFGAKGVTVVGATWTPDTARELHKLIKRVSRKPVLEVINTNYHTDRAGGNAYWKSIGAKVVSTRQTRDLMKSDWAEIVAFTRKGLPEYPDLPLVLPNVVHDGDFTLQEGKLRAFYAGPAHTPDGIFVYFPDEQVLYGNCIIKEKLGNLSFADVKAYPQTLERLKAMKLPIKTVVGGHDSPLHGPELIDHYEALIKAAPQS	1	254	99.6063	0	0	0	253	Cluster_4	ChpA_family_subclass_B2_metallo-beta-lactamase_ImiS_NG_050415.1_cds_WP_063865298.1_1	Cluster_4	SP_Sec_SPI_	26-27	SP_Sec_SPI_	26-27	N_Y_H_T_D	C	H	.	.
B2_1093	GCF_963891405.1	650	650	Aeromonas_jandaei	Bacteria-Pseudomonadota-Gammaproteobacteria-Aeromonadales-Aeromonadaceae-Aeromonas-	4511100	NZ_CAWPTK010000017.1	class_B2	544.4	+	308193	308952	308194	308955	ATGAAAGGTTGGATGAAGTGCGGATTGGCCGGAGCCGTGGTGCTGATGGCGAGTTTCTGGGGCGGCAGCGTGCGGGCGGCGGGGATCTCCCTCAAGCAGGTGAGCGGCCCTGTCTATGTGGTGGAGGACAACTACTACGTCAAAGAGAACTCCATGGTCTATTTCGGGGCCAAGGGGGTGACGGTGGTGGGGGCGACCTGGACGCCGGATACCGCCCGCGAGCTGCACAAGCTGATCAAACGGGTCAGCAGCAAGCCGGTGCTGGAGGTGATCAACACCAACTACCACACCGATCGGGCGGGCGGTAACGCCTACTGGAAGTCCATCGGGGCCAAGGTGGTGGCGACGCGCCAGACCCGGGAGCTGATGAAGAGCGACTGGGCCGAGATTGTCGCCTTT…	WP_339354557.1	CphA_family_subclass_B2_metallo-beta-lactamase	MKGWMKCGLAGAVVLMASFWGGSVRAAGISLKQVSGPVYVVEDNYYVKENSMVYFGAKGVTVVGATWTPDTARELHKLIKRVSSKPVLEVINTNYHTDRAGGNAYWKSIGAKVVATRQTRELMKSDWAEIVAFTRKGLPEYPDLPLVLPNVVHDGDFKLQEGKVRAFYAGPAHTPDGIFVYFPDEQVLYGNCILKEKLGNLSFANVKEYPQTIERLKAMKLPIKTVIGGHDSPLHGPELIDHYEALIKAAPQS	ORF_OK	TRUE_HIT	mmkgwikcglagavvllasfwggsvraagislkqvsgpvyvvednyyvkensmvyfgakgvtvvgatwtpdtarelhklikrvsskpvlevintnyhtdraggnaywksigakvvatrqtrdlmksdwaeivaftrkglpeypdlplvlpnvvhdgdftlqegkvralyagpahtpdgifvyfpdeqvlygncilkeklgnlsfadvkaypktlerlkalklpiktvigghdsplhgpelidhyealikaaaks	MMKGWMKCGLAGAVVLMASFWGGSVRAAGISLKQVSGPVYVVEDNYYVKENSMVYFGAKGVTVVGATWTPDTARELHKLIKRVSSKPVLEVINTNYHTDRAGGNAYWKSIGAKVVATRQTRELMKSDWAEIVAFTRKGLPEYPDLPLVLPNVVHDGDFKLQEGKVRAFYAGPAHTPDGIFVYFPDEQVLYGNCILKEKLGNLSFANVKEYPQTIERLKAMKLPIKTVIGGHDSPLHGPELIDHYEALIKAAPQS	1	254	99.6063	0	0	0	253	Cluster_4	ChpA_family_subclass_B2_metallo-beta-lactamase_ImiS_NG_050415.1_cds_WP_063865298.1_1	Cluster_4	SP_Sec_SPI_	26-27	SP_Sec_SPI_	26-27	N_Y_H_T_D	C	H	.	.
B2_1094	GCF_963891545.1	196024	196024	Aeromonas_dhakensis	Bacteria-Pseudomonadota-Gammaproteobacteria-Aeromonadales-Aeromonadaceae-Aeromonas-	4884137	NZ_CAWPTV010000047.1	class_B2	545.9	-	15453	16212	15451	16212	ATGAAAGGTTGGATAAAGTGCGGGCTGGCCGGGGCCCTGGTGCTGATGGCGAGTTTCTGGGGTGGCAGCGTGCGGGCGGCGGGGATGTCGCTGACGCAGGTGAGCGGCCCTGTCTATGTGGTGGAGGACAACTACTACGTCAAAGAGAACTCCATGGTCTATTTCGGGGCCAAGGGGGTGACTGTGGTGGGGGCGACCTGGACGCCGGATACCGCCCGCGAGTTGCACAAGCTGATCAAACGGGTCAGCCGCCAGCCGGTGCTGGAGGTGATCAACACCAACTACCACACCGACCGGGCTGGCGGTAACGCCTACTGGAAGTCCATCGGTGCCAAGGTGGTATCGACCCGCCAGACCCGGGATCTGATGAAGAGCGACTGGGCCGAGATTGTCGCCTTT…	WP_226014106.1	CphA_family_subclass_B2_metallo-beta-lactamase	MKGWIKCGLAGALVLMASFWGGSVRAAGMSLTQVSGPVYVVEDNYYVKENSMVYFGAKGVTVVGATWTPDTARELHKLIKRVSRQPVLEVINTNYHTDRAGGNAYWKSIGAKVVSTRQTRDLMKSDWAEIVAFTRKGLPEYPDLPLVLPNVVHEGDFTLQEGKLRAFYAGPAHTPDGIFVYFPDEQVLYGNCILKEKLGNLSFADVKAYPQTLERLKAMKLPIKTVVGGHDSPLHGPELIDHYEALIKAAPQS	ORF_OK	TRUE_HIT	mmkgwikcglagavvllasfwggsvraagislkqvsgpvyvvednyyvkensmvyfgakgvtvvgatwtpdtarelhklikrvsskpvlevintnyhtdraggnaywksigakvvatrqtrdlmksdwaeivaftrkglpeypdlplvlpnvvhdgdftlqegkvralyagpahtpdgifvyfpdeqvlygncilkeklgnlsfadvkaypktlerlkalklpiktvigghdsplhgpelidhyealikaaaks	MMKGWIKCGLAGALVLMASFWGGSVRAAGMSLTQVSGPVYVVEDNYYVKENSMVYFGAKGVTVVGATWTPDTARELHKLIKRVSRQPVLEVINTNYHTDRAGGNAYWKSIGAKVVSTRQTRDLMKSDWAEIVAFTRKGLPEYPDLPLVLPNVVHEGDFTLQEGKLRAFYAGPAHTPDGIFVYFPDEQVLYGNCILKEKLGNLSFADVKAYPQTLERLKAMKLPIKTVVGGHDSPLHGPELIDHYEALIKAAPQS	1	254	99.6063	0	0	0	253	Cluster_4	ChpA_family_subclass_B2_metallo-beta-lactamase_ImiS_NG_050415.1_cds_WP_063865298.1_1	Cluster_4	SP_Sec_SPI_	26-27	SP_Sec_SPI_	26-27	N_Y_H_T_D	C	H	.	.
B2_1095	GCF_963891645.1	196024	196024	Aeromonas_dhakensis	Bacteria-Pseudomonadota-Gammaproteobacteria-Aeromonadales-Aeromonadaceae-Aeromonas-	4705940	NZ_CAWPUP010000018.1	class_B2	542.9	-	15638	16397	15636	16397	ATGAAAGGTTGGATGAAGTGCGGGCTGGCCGGGGCCCTGGTGCTGATGGCGAGTTTCTGGGGTGGCAGCGTGCGGGCGGCGGGGATGTCGCTGACGCAGGTGAGCGGCCCTGTCTATGTTGTCGAAGATAACTACTACGTACAGGAAAACTCCATGGTCTATTTCGGGGCCAAGGGGGTGACGGTAGTGGGGGCGACCTGGACGCCGGATACCGCCCGCGAGCTGCACAAGCTGATCAAACGGGTGAGCCGCAAGCCGGTGCTGGAGGTGATCAACACCAACTACCACACCGACCGGGCGGGCGGTAACGCCTACTGGAAGTCCATCGGGGCCAAGGTGGTATCGACGCGCCAGACCCGGGATCTGATGAAGAGCGACTGGGCCGAGATTGTCGCCTTT…	WP_026459035.1	CphA_family_subclass_B2_metallo-beta-lactamase	MKGWMKCGLAGALVLMASFWGGSVRAAGMSLTQVSGPVYVVEDNYYVQENSMVYFGAKGVTVVGATWTPDTARELHKLIKRVSRKPVLEVINTNYHTDRAGGNAYWKSIGAKVVSTRQTRDLMKSDWAEIVAFTRKGLPEYPDLPLVLPNVVHDGDFTLQEGKLRAFYLGPAHTPDGIFVYFPDQQVLYGNCILKEKLGNLSFADVKAYPQTLERLKAMKLPIKTVVGGHDSPLHGPELIDHYEALIKAAPQS	ORF_OK	TRUE_HIT	mmkgwikcglagavvllasfwggsvraagislkqvsgpvyvvednyyvkensmvyfgakgvtvvgatwtpdtarelhklikrvsskpvlevintnyhtdraggnaywksigakvvatrqtrdlmksdwaeivaftrkglpeypdlplvlpnvvhdgdftlqegkvralyagpahtpdgifvyfpdeqvlygncilkeklgnlsfadvkaypktlerlkalklpiktvigghdsplhgpelidhyealikaaaks	MMKGWMKCGLAGALVLMASFWGGSVRAAGMSLTQVSGPVYVVEDNYYVQENSMVYFGAKGVTVVGATWTPDTARELHKLIKRVSRKPVLEVINTNYHTDRAGGNAYWKSIGAKVVSTRQTRDLMKSDWAEIVAFTRKGLPEYPDLPLVLPNVVHDGDFTLQEGKLRAFYLGPAHTPDGIFVYFPDQQVLYGNCILKEKLGNLSFADVKAYPQTLERLKAMKLPIKTVVGGHDSPLHGPELIDHYEALIKAAPQS	1	254	99.6063	0	0	0	253	Cluster_4	ChpA_family_subclass_B2_metallo-beta-lactamase_ImiS_NG_050415.1_cds_WP_063865298.1_1	Cluster_4	SP_Sec_SPI_	26-27	SP_Sec_SPI_	26-27	N_Y_H_T_D	C	H	.	.
B2_1096	GCF_963891695.1	196024	196024	Aeromonas_dhakensis	Bacteria-Pseudomonadota-Gammaproteobacteria-Aeromonadales-Aeromonadaceae-Aeromonas-	4732965	NZ_CAWPUS010000020.1	class_B2	538.4	-	12386	13145	12384	13145	ATGAAAGGTTGGATAAAGTGCGGATTGGCCGGAGCCGTGGTGCTGATGGCGAGTTTCTGGGGTGGCAGCGTGCGTGCGGCGGGGATGTCGCTGACGCAGGTGAGCGGCCCTGTCTATGTGGTGGAGGACAACTACTACGTCAAAGAGAACTCCATGGTCTATTTCGGGGCCAAGGGGGTGACGGTGGTGGGGGCGACCTGGACGCCGGATACCGCCCGCGAGCTACACAAGCTGATCAAACGGATTAGCAGCAAGCCGGTGCTGGAGGTGATCAACACCAACTACCACACCGACCGGGCGGGTGGTAACGCCTACTGGAAGTCCATCGGTGTCAAGGTGGTATCGACCCGTCAGACCCGGGATCTGATGAAGAGCGACTGGGCCGAGATTGTCGCCTTT…	WP_236660499.1	CphA_family_subclass_B2_metallo-beta-lactamase	MKGWIKCGLAGAVVLMASFWGGSVRAAGMSLTQVSGPVYVVEDNYYVKENSMVYFGAKGVTVVGATWTPDTARELHKLIKRISSKPVLEVINTNYHTDRAGGNAYWKSIGVKVVSTRQTRDLMKSDWAEIVAFTRKGLPEYPDLPLVLPNVVHDGDFMLQEGKLRAFYAGPAHTPDGIFVYFPDEQVLYGNCILKEKLGNLSFADVKAYPQTLERLKAMKLPIKTVVGGHDSPLHGPELIDHYEALIKAVPQS	ORF_OK	TRUE_HIT	mmkgwikcglagavvllasfwggsvraagislkqvsgpvyvvednyyvkensmvyfgakgvtvvgatwtpdtarelhklikrvsskpvlevintnyhtdraggnaywksigakvvatrqtrdlmksdwaeivaftrkglpeypdlplvlpnvvhdgdftlqegkvralyagpahtpdgifvyfpdeqvlygncilkeklgnlsfadvkaypktlerlkalklpiktvigghdsplhgpelidhyealikaaaks	MMKGWIKCGLAGAVVLMASFWGGSVRAAGMSLTQVSGPVYVVEDNYYVKENSMVYFGAKGVTVVGATWTPDTARELHKLIKRISSKPVLEVINTNYHTDRAGGNAYWKSIGVKVVSTRQTRDLMKSDWAEIVAFTRKGLPEYPDLPLVLPNVVHDGDFMLQEGKLRAFYAGPAHTPDGIFVYFPDEQVLYGNCILKEKLGNLSFADVKAYPQTLERLKAMKLPIKTVVGGHDSPLHGPELIDHYEALIKAVPQS	1	254	99.6063	0	0	0	253	Cluster_4	ChpA_family_subclass_B2_metallo-beta-lactamase_ImiS_NG_050415.1_cds_WP_063865298.1_1	Cluster_4	SP_Sec_SPI_	26-27	SP_Sec_SPI_	26-27	N_Y_H_T_D	C	H	.	.
B2_1097	GCF_963891905.1	196024	196024	Aeromonas_dhakensis	Bacteria-Pseudomonadota-Gammaproteobacteria-Aeromonadales-Aeromonadaceae-Aeromonas-	4841664	NZ_CAWPWI010000044.1	class_B2	545.9	-	15453	16212	15451	16212	ATGAAAGGTTGGATAAAGTGCGGGCTGGCCGGGGCCCTGGTGCTGATGGCGAGTTTCTGGGGTGGCAGCGTGCGGGCGGCGGGGATGTCGCTGACGCAGGTGAGCGGCCCTGTCTATGTGGTGGAGGACAACTACTACGTCAAAGAGAACTCCATGGTCTATTTCGGGGCCAAGGGGGTGACTGTGGTGGGGGCGACCTGGACGCCGGATACCGCCCGCGAGTTGCACAAGCTGATCAAACGGGTCAGCCGCCAGCCGGTGCTGGAGGTGATCAACACCAACTACCACACCGACCGGGCTGGCGGTAACGCCTACTGGAAGTCCATCGGTGCCAAGGTGGTATCGACCCGCCAGACCCGGGATCTGATGAAGAGCGACTGGGCCGAGATTGTCGCCTTT…	WP_226014106.1	CphA_family_subclass_B2_metallo-beta-lactamase	MKGWIKCGLAGALVLMASFWGGSVRAAGMSLTQVSGPVYVVEDNYYVKENSMVYFGAKGVTVVGATWTPDTARELHKLIKRVSRQPVLEVINTNYHTDRAGGNAYWKSIGAKVVSTRQTRDLMKSDWAEIVAFTRKGLPEYPDLPLVLPNVVHEGDFTLQEGKLRAFYAGPAHTPDGIFVYFPDEQVLYGNCILKEKLGNLSFADVKAYPQTLERLKAMKLPIKTVVGGHDSPLHGPELIDHYEALIKAAPQS	ORF_OK	TRUE_HIT	mmkgwikcglagavvllasfwggsvraagislkqvsgpvyvvednyyvkensmvyfgakgvtvvgatwtpdtarelhklikrvsskpvlevintnyhtdraggnaywksigakvvatrqtrdlmksdwaeivaftrkglpeypdlplvlpnvvhdgdftlqegkvralyagpahtpdgifvyfpdeqvlygncilkeklgnlsfadvkaypktlerlkalklpiktvigghdsplhgpelidhyealikaaaks	MMKGWIKCGLAGALVLMASFWGGSVRAAGMSLTQVSGPVYVVEDNYYVKENSMVYFGAKGVTVVGATWTPDTARELHKLIKRVSRQPVLEVINTNYHTDRAGGNAYWKSIGAKVVSTRQTRDLMKSDWAEIVAFTRKGLPEYPDLPLVLPNVVHEGDFTLQEGKLRAFYAGPAHTPDGIFVYFPDEQVLYGNCILKEKLGNLSFADVKAYPQTLERLKAMKLPIKTVVGGHDSPLHGPELIDHYEALIKAAPQS	1	254	99.6063	0	0	0	253	Cluster_4	ChpA_family_subclass_B2_metallo-beta-lactamase_ImiS_NG_050415.1_cds_WP_063865298.1_1	Cluster_4	SP_Sec_SPI_	26-27	SP_Sec_SPI_	26-27	N_Y_H_T_D	C	H	.	.
B2_1098	GCF_963891925.1	196024	196024	Aeromonas_dhakensis	Bacteria-Pseudomonadota-Gammaproteobacteria-Aeromonadales-Aeromonadaceae-Aeromonas-	4884157	NZ_CAWPWG010000001.1	class_B2	534.1	+	477194	477953	477195	477956	ATGAAAGGTTGGATAAAGTGCGGGCTGGCCGGGGCCCTGGTGCTGATGGCGAGTTTCTGGGGTGGCAGCGTGCGGGCGGCGGGGATGTCGCTGACGCAGGTGAGCGGCCCTGTCTATGTTGTCGAGGACAACTACTACATACAGGAAAACTCCATGGTCTATTTCGGGGCCAAGGGGGTGACTGTGGTGGGGGCGACCTGGACGCCAGATACCGCCCGCGAGCTGCACAAGCTGATCAAACGGGTCAGCCGCCAGCCTGTGCTGGAGGTGATCAACACCAACTACCACACCGACCGGGCAGGCGGTAACGCCTACTGGAAGTCCATCGGGGCCAAGGTGGTATCGACCCGTCAGACCCGGGATCTGATGAAGAGCGACTGGGCCGAGATTGTCGCCTTT…	WP_241097950.1	CphA_family_subclass_B2_metallo-beta-lactamase	MKGWIKCGLAGALVLMASFWGGSVRAAGMSLTQVSGPVYVVEDNYYIQENSMVYFGAKGVTVVGATWTPDTARELHKLIKRVSRQPVLEVINTNYHTDRAGGNAYWKSIGAKVVSTRQTRDLMKSDWAEIVAFTRKGLPEYPDLPLVLPNVVHEGDFMLQEGKLRAFYAGPAHTPDGIFVYFPDEQVLYGNCILKEKLGNLSFADVKAYPRTLERLKAMKLPIKTVVGGHDSPLHGPELIDHYEALIKAAPQS	ORF_OK	TRUE_HIT	mmkgwikcglagavvllasfwggsvraagislkqvsgpvyvvednyyvkensmvyfgakgvtvvgatwtpdtarelhklikrvsskpvlevintnyhtdraggnaywksigakvvatrqtrdlmksdwaeivaftrkglpeypdlplvlpnvvhdgdftlqegkvralyagpahtpdgifvyfpdeqvlygncilkeklgnlsfadvkaypktlerlkalklpiktvigghdsplhgpelidhyealikaaaks	MMKGWIKCGLAGALVLMASFWGGSVRAAGMSLTQVSGPVYVVEDNYYIQENSMVYFGAKGVTVVGATWTPDTARELHKLIKRVSRQPVLEVINTNYHTDRAGGNAYWKSIGAKVVSTRQTRDLMKSDWAEIVAFTRKGLPEYPDLPLVLPNVVHEGDFMLQEGKLRAFYAGPAHTPDGIFVYFPDEQVLYGNCILKEKLGNLSFADVKAYPRTLERLKAMKLPIKTVVGGHDSPLHGPELIDHYEALIKAAPQS	1	254	99.6063	0	0	0	253	Cluster_4	ChpA_family_subclass_B2_metallo-beta-lactamase_ImiS_NG_050415.1_cds_WP_063865298.1_1	Cluster_4	SP_Sec_SPI_	26-27	SP_Sec_SPI_	26-27	N_Y_H_T_D	C	H	.	.
B2_1099	GCF_963892185.1	650	650	Aeromonas_jandaei	Bacteria-Pseudomonadota-Gammaproteobacteria-Aeromonadales-Aeromonadaceae-Aeromonas-	4313506	NZ_CAWPXG010000012.1	class_B2	544.8	-	9608	10367	9606	10355	ATGAAATGCGGATTGGCCGGAGCCGTGGTGCTGATGGCGAGTTTTTGGGGCGGCAGCGTGCGGGCGGCGGGGATCTCCCTCAAGCAGGTGAGCGGCCCTGTCTATGTGGTGGAGGACAACTACTACGTCAAAGAGAACTCCATGGTCTATTTCGGGGCCAAGGGGGTGACGGTGGTGGGGGCGACCTGGACGCCGGATACCGCCCGCGAGCTGCACAAGCTCATTAAACGGGTCAGCAGCAAGCCGGTGCTGGAGGTGATCAACACCAACTACCACACCGACCGGGCGGGTGGTAACGCCTACTGGAAGTCCATCGGGGCCAAGGTGGTGGCGACGCGCCAGACCCGGGATCTGATGAAGAGCGACTGGGCCGAGATTGTCGCCTTTACCCGCAAGGGG…	WP_339379777.1	CphA_family_subclass_B2_metallo-beta-lactamase	MKCGLAGAVVLMASFWGGSVRAAGISLKQVSGPVYVVEDNYYVKENSMVYFGAKGVTVVGATWTPDTARELHKLIKRVSSKPVLEVINTNYHTDRAGGNAYWKSIGAKVVATRQTRDLMKSDWAEIVAFTRKGLPEYPDLPLVLPNVVHDGDFKLQDGKVRAFYAGPAHTPDGIFVYFPDEQVLYGNCILKEKLGNLSFANVKEYPQTIERLKAMKLPIKTVIGGHDSPLHGPELIDHYEELIKAVPQS	ORF_OK	TRUE_HIT	mmkgwikcglagavvllasfwggsvraagislkqvsgpvyvvednyyvkensmvyfgakgvtvvgatwtpdtarelhklikrvsskpvlevintnyhtdraggnaywksigakvvatrqtrdlmksdwaeivaftrkglpeypdlplvlpnvvhdgdftlqegkvralyagpahtpdgifvyfpdeqvlygncilkeklgnlsfadvkaypktlerlkalklpiktvigghdsplhgpelidhyealikaaaks	MMKGWMKCGLAGAVVLMASFWGGSVRAAGISLKQVSGPVYVVEDNYYVKENSMVYFGAKGVTVVGATWTPDTARELHKLIKRVSSKPVLEVINTNYHTDRAGGNAYWKSIGAKVVATRQTRDLMKSDWAEIVAFTRKGLPEYPDLPLVLPNVVHDGDFKLQDGKVRAFYAGPAHTPDGIFVYFPDEQVLYGNCILKEKLGNLSFANVKEYPQTIERLKAMKLPIKTVIGGHDSPLHGPELIDHYEELIKAVPQS	1	254	99.6063	0	0	0	249	Cluster_4	ChpA_family_subclass_B2_metallo-beta-lactamase_ImiS_NG_050415.1_cds_WP_063865298.1_1	Cluster_4	SP_Sec_SPI_	22-23	SP_Sec_SPI_	22-23	N_Y_H_T_D	C	H	.	.
B2_11	GCF_002882915.1	2751334	2751334	Pseudomonas_sp_FW305-3-2-15-C-TSA2	Bacteria-Pseudomonadota-Gammaproteobacteria-Pseudomonadales-Pseudomonadaceae-Pseudomonas-unclassified_Pseudomonas-	6603863	NZ_POEI01000004.1	class_B2	372.5	-	7051	7780	7040	7801	ATGAAGCTTAGCAGTATTCTCTCAGCCCTTAGCATGGCCTGCGTCACCTGTCAGGTAATCGCTAACGACACGAACCTGACTCTCACCCACTTCAAAGGCCCGCTCTACATCGTTGAAGACAAAGAGTATGTGCAAGAAAATTCAATGGTCTACATCGGTGCGCAAAACATCACGATTATCGGCGCAACCTGGACCCCAGCAACCGCCGAGAAGCTGGAGCAGGAAATCAGGAGAGTCAGCCCCCTGCCCATCAAGGACGTAATCAACACCAACTACCACACCGACCGCGCGGGCGGTAACGCGTACTGGAAAAAGCGCGGCGCGAGTATCGTCTCCACGCAGATGACCTATGACCTGGAAAAAAGCCAGTGGCGCAGTATTGTCGACTTCACCCGCCAA…	WP_102591908.1	SFH-related_subclass_B2_metallo-beta-lactamase	MKLSSILSALSMACVTCQVIANDTNLTLTHFKGPLYIVEDKEYVQENSMVYIGAQNITIIGATWTPATAEKLEQEIRRVSPLPIKDVINTNYHTDRAGGNAYWKKRGASIVSTQMTYDLEKSQWRSIVDFTRQGMEHFPVLEQSLPDKVHPGDFTLQNGNVRAMYLGAAHTEDGIFVYFPEERVLYGNCILKEKLGNMTFANRTEYPKTLKKLQGLIDSGELPVDAIIAGHNSPIQGVELIDQYLNLLEHDKH	ORF_OK	TRUE_HIT	gavvllasfwggsvraagi.slkqvsgpvyvvednyyvkensmvyfgakgvtvvgatwtpdtarelhklikrvsskpvlevintnyhtdraggnaywksigakvvatrqtrdlmksdwaeivaftrkglpeypdlplvlpnvvhdgdftlqegkvralyagpahtpdgifvyfpdeqvlygncilkeklgnlsfadvkaypktlerlkal....klpiktvigghdsplhgpelidhyealika	LSALSMACVTCQVIANDTNlTLTHFKGPLYIVEDKEYVQENSMVYIGAQNITIIGATWTPATAEKLEQEIRRVSPLPIKDVINTNYHTDRAGGNAYWKKRGASIVSTQMTYDLEKSQWRSIVDFTRQGMEHFPVLEQSLPDKVHPGDFTLQNGNVRAMYLGAAHTEDGIFVYFPEERVLYGNCILKEKLGNMTFANRTEYPKTLKKLQGLidsgELPVDAIIAGHNSPIQGVELIDQYLNLLEH	12	250	93.7008	5	0	0	253	Cluster_1	CLUSTER_NOT_IN_NCBI_AMR_REF_DB	Cluster_1	SP_Sec_SPI_	21-22	LIPO_Sec_SPII_	13-14	N_Y_H_T_D	C	Q	.	.
B2_110	GCF_006246545.1	644	644	Aeromonas_hydrophila	Bacteria-Pseudomonadota-Gammaproteobacteria-Aeromonadales-Aeromonadaceae-Aeromonas-	4956224	NZ_NKXI01000055.1	class_B2	548.9	+	8925	9684	8923	9687	ATGATGAAAGGTTGGATGAAGTGCGGGCTGGCCGGGGCCGTGGTGCTGATGGCGAGTTTTTGGGGCGGCAGCGTGCGGGCGGCGGGGATGTCGCTGACGCAGGTGAGCGGCCCGGTCTATGTGGTGGAGGACAACTACTACGTGCAGGAAAACTCCATGGTCTATTTCGGGGCCAAGGGGGTGACCGTGGTGGGGGCCACCTGGACGCCGGATACCGCCCGCGAGCTGCACAAGCTGATCAAACGGGTCAGCCGCAAGCCTGTGCTGGAGGTGATCAACACCAACTACCACACCGACCGGGCAGGCGGTAACGCCTACTGGAAGTCCATCGGTGCCAAGGTGGTATCGACCCGCCAGACCCGGGATCTGATGAAGAGCGACTGGGCCGAGATTGTCGCC…	WP_139750506.1	CphA_family_subclass_B2_metallo-beta-lactamase	MMKGWMKCGLAGAVVLMASFWGGSVRAAGMSLTQVSGPVYVVEDNYYVQENSMVYFGAKGVTVVGATWTPDTARELHKLIKRVSRKPVLEVINTNYHTDRAGGNAYWKSIGAKVVSTRQTRDLMKSDWAEIVAFTRKGLPEYPDLPLVLPNVVHEGDFTLQEGKLRAFYAGPAHTPDGIFVYFPDEQVLYGNCILKEKLGNLSFADVKEYPQTIERLKAMKLPIKTVVGGHDSPLHGPELIDHYEALIKAAPQS	ORF_OK	TRUE_HIT	mmkgwikcglagavvllasfwggsvraagislkqvsgpvyvvednyyvkensmvyfgakgvtvvgatwtpdtarelhklikrvsskpvlevintnyhtdraggnaywksigakvvatrqtrdlmksdwaeivaftrkglpeypdlplvlpnvvhdgdftlqegkvralyagpahtpdgifvyfpdeqvlygncilkeklgnlsfadvkaypktlerlkalklpiktvigghdsplhgpelidhyealikaaaks	MMKGWMKCGLAGAVVLMASFWGGSVRAAGMSLTQVSGPVYVVEDNYYVQENSMVYFGAKGVTVVGATWTPDTARELHKLIKRVSRKPVLEVINTNYHTDRAGGNAYWKSIGAKVVSTRQTRDLMKSDWAEIVAFTRKGLPEYPDLPLVLPNVVHEGDFTLQEGKLRAFYAGPAHTPDGIFVYFPDEQVLYGNCILKEKLGNLSFADVKEYPQTIERLKAMKLPIKTVVGGHDSPLHGPELIDHYEALIKAAPQS	1	254	99.6063	0	0	0	254	Cluster_4	ChpA_family_subclass_B2_metallo-beta-lactamase_ImiS_NG_050415.1_cds_WP_063865298.1_1	Cluster_4	SP_Sec_SPI_	27-28	SP_Sec_SPI_	27-28	N_Y_H_T_D	C	H	.	.
B2_1100	GCF_963892215.1	654	654	Aeromonas_veronii	Bacteria-Pseudomonadota-Gammaproteobacteria-Aeromonadales-Aeromonadaceae-Aeromonas-	4347438	NZ_CAWPXP010000043.1	class_B2	551.5	+	375	1134	373	1137	ATGATGAAAGGTTGGATGAAGTGCACATTGGCCGGAGCCGTGGTGCTGATGGCGAGTTTCTGGGGTGGCAGCGTGCGGGCGGCGGGGATCTCCCTTAAGCAGGTGAGCGGCCCTGTTTACGTGGTTGAAGATAACTACTACGTAAAGGAAAACTCCATGGTCTATTTCGGGGCCAAGGGGGTGACTGTGGTGGGGGCGACCTGGACGCCGGATACCGCCCGCGAGCTGCACAAGCTCATTAAACGGGTCAGCAGCAAGCCGGTGCTGGAGGTGATCAACACCAACTACCACACCGACCGGGCGGGCGGTAACGCCTACTGGAAGTCCATCGGGGCCAAGGTGGTGGCGACTCGCCAGACCAGGGATCTGATGAAGAGCGACTGGGCCGAGATTGTCGCC…	WP_201904536.1	CphA_family_subclass_B2_metallo-beta-lactamase	MMKGWMKCTLAGAVVLMASFWGGSVRAAGISLKQVSGPVYVVEDNYYVKENSMVYFGAKGVTVVGATWTPDTARELHKLIKRVSSKPVLEVINTNYHTDRAGGNAYWKSIGAKVVATRQTRDLMKSDWAEIVAFTRKGLPEYPDLPLVLPNVVHDGDFTLQEGKVRAFYAGPAHTPDGIFVYFPDEQVLYGNCILKEKLGNLSFANVKAYPQTIERLKAMKLPIKTVIGGHDSPLHGPELIDHYEELIKAAPQS	ORF_OK	TRUE_HIT	mmkgwikcglagavvllasfwggsvraagislkqvsgpvyvvednyyvkensmvyfgakgvtvvgatwtpdtarelhklikrvsskpvlevintnyhtdraggnaywksigakvvatrqtrdlmksdwaeivaftrkglpeypdlplvlpnvvhdgdftlqegkvralyagpahtpdgifvyfpdeqvlygncilkeklgnlsfadvkaypktlerlkalklpiktvigghdsplhgpelidhyealikaaaks	MMKGWMKCTLAGAVVLMASFWGGSVRAAGISLKQVSGPVYVVEDNYYVKENSMVYFGAKGVTVVGATWTPDTARELHKLIKRVSSKPVLEVINTNYHTDRAGGNAYWKSIGAKVVATRQTRDLMKSDWAEIVAFTRKGLPEYPDLPLVLPNVVHDGDFTLQEGKVRAFYAGPAHTPDGIFVYFPDEQVLYGNCILKEKLGNLSFANVKAYPQTIERLKAMKLPIKTVIGGHDSPLHGPELIDHYEELIKAAPQS	1	254	99.6063	0	0	0	254	Cluster_4	ChpA_family_subclass_B2_metallo-beta-lactamase_ImiS_NG_050415.1_cds_WP_063865298.1_1	Cluster_4	SP_Sec_SPI_	27-28	SP_Sec_SPI_	27-28	N_Y_H_T_D	C	H	.	.
B2_1101	GCF_963892265.1	196024	196024	Aeromonas_dhakensis	Bacteria-Pseudomonadota-Gammaproteobacteria-Aeromonadales-Aeromonadaceae-Aeromonas-	4753178	NZ_CAWPXL010000013.1	class_B2	540.9	-	15650	16409	15648	16409	ATGAAAGGTTGGATAAAGTGCGGGCTGGCCGGGGCCCTGGTGCTGATGGCGAGTTTCTGGGGTGGCAGCGTGCGGGCGGCGGGGATGTCGCTGACGCAGGTGAGCGGCCCTGTCTATGTGGTGGAGGACAACTACTACGTCAAAGAGAACTCCATGGTCTATTTCGGGGCCAAGGGGGTGACTGTGGTGGGGGCGACCTGGACGCCGGATACCGCCCGCGAGTTGCACAAGCTGATCAAACGGGTCAGCCGCCAGCCGGTGCTGGAGGTGATCAACACCAACTACCACACCGACCGGGCTGGCGGTAACGCCTACTGGAAGTCCATCGGTGCCAAGGTGGTATCGACCCGCCAGACCCGGGATCTGATGAAGAGCGACTGGGCCGAGATTGTCGCCTTT…	WP_226014106.1	CphA_family_subclass_B2_metallo-beta-lactamase	MKGWIKCGLAGALVLMASFWGGSVRAAGMSLTQVSGPVYVVEDNYYVKENSMVYFGAKGVTVVGATWTPDTARELHKLIKRVSRQPVLEVINTNYHTDRAGGNAYWKSIGAKVVSTRQTRDLMKSDWAEIVAFTRKGLPEYPDLPLVLPNVVHEGDFTLQEGKLRAFYAGPAHTPDGIFVYFPDEQVLYGNCILKEKLGNLSFADVKAYPQTLERLKAMKLPIKTVVGGHDSPLHGPELIDHYEALIKAAPQS	ORF_OK	TRUE_HIT	mmkgwikcglagavvllasfwggsvraagislkqvsgpvyvvednyyvkensmvyfgakgvtvvgatwtpdtarelhklikrvsskpvlevintnyhtdraggnaywksigakvvatrqtrdlmksdwaeivaftrkglpeypdlplvlpnvvhdgdftlqegkvralyagpahtpdgifvyfpdeqvlygncilkeklgnlsfadvkaypktlerlkalklpiktvigghdsplhgpelidhyealikaaaks	MMKGWIKCGLAGALVLMASFWGGSVRAAGMSLTQVSGPVYVVEDNYYVKENSMVYFGAKGVTVVGATWTPDTARELHKLIKRVSRQPVLEVINTNYHTDRAGGNAYWKSIGAKVVSTRQTRDLMKSDWAEIVAFTRKGLPEYPDLPLVLPNVVHEGDFTLQEGKLRAFYAGPAHTPDGIFVYFPDEQVLYGNCILKEKLGNLSFADVKAYPQTLERLKAMKLPIKTVVGGHDSPLHGPELIDHYEALIKAAPQS	1	254	99.6063	0	0	0	253	Cluster_4	ChpA_family_subclass_B2_metallo-beta-lactamase_ImiS_NG_050415.1_cds_WP_063865298.1_1	Cluster_4	SP_Sec_SPI_	26-27	SP_Sec_SPI_	26-27	N_Y_H_T_D	C	H	.	.
B2_1102	GCF_963892315.1	196024	196024	Aeromonas_dhakensis	Bacteria-Pseudomonadota-Gammaproteobacteria-Aeromonadales-Aeromonadaceae-Aeromonas-	4770671	NZ_CAWPXU010000014.1	class_B2	542.8	-	15537	16296	15535	16296	ATGAAAGGTTGGATAAAGTGCGGGCTGGCCGGGGCCGTGGTGCTGATGGCGAGTTTCTGGGGTGGCAGCGTGCGGGCGGCGGGGATGTCGCTGACGCAGGTGAGCGGCCCTGTCTATGTGGTGGAGGACAACTACTACGTCAAAGAGAACTCCATGGTCTATTTCGGGACCAAGGGGGTGACGGTGGTGGGGGCGACCTGGACGCCGGATACCGCCCGCGAGTTGCACAAGCTGATCAAACGGGTCAGCCGCCAGCCGGTGCTGGAGGTGATCAACACCAACTACCACACCGACCGGGCTGGCGGTAACGCCTACTGGAAGTCCATCGGTGCCAAGGTGGTATCGACCCGCCAGACCCGGGATCTGATGAAGAGCGACTGGGCCGAGATTGTCGCCTTT…	WP_017409078.1	CphA_family_subclass_B2_metallo-beta-lactamase	MKGWIKCGLAGAVVLMASFWGGSVRAAGMSLTQVSGPVYVVEDNYYVKENSMVYFGTKGVTVVGATWTPDTARELHKLIKRVSRQPVLEVINTNYHTDRAGGNAYWKSIGAKVVSTRQTRDLMKSDWAEIVAFTRKGLPEYPDLPLVLPNVVHEGDFTLQEGKLRAFYAGPAHTPDGIFVYFPDEQVLYGNCILKEKLGNLSFADVKAYPQTLERLKAMKLPIKTVVGGHDSPLHGPELIDHYEALIKAAPQS	ORF_OK	TRUE_HIT	mmkgwikcglagavvllasfwggsvraagislkqvsgpvyvvednyyvkensmvyfgakgvtvvgatwtpdtarelhklikrvsskpvlevintnyhtdraggnaywksigakvvatrqtrdlmksdwaeivaftrkglpeypdlplvlpnvvhdgdftlqegkvralyagpahtpdgifvyfpdeqvlygncilkeklgnlsfadvkaypktlerlkalklpiktvigghdsplhgpelidhyealikaaaks	MMKGWIKCGLAGAVVLMASFWGGSVRAAGMSLTQVSGPVYVVEDNYYVKENSMVYFGTKGVTVVGATWTPDTARELHKLIKRVSRQPVLEVINTNYHTDRAGGNAYWKSIGAKVVSTRQTRDLMKSDWAEIVAFTRKGLPEYPDLPLVLPNVVHEGDFTLQEGKLRAFYAGPAHTPDGIFVYFPDEQVLYGNCILKEKLGNLSFADVKAYPQTLERLKAMKLPIKTVVGGHDSPLHGPELIDHYEALIKAAPQS	1	254	99.6063	0	0	0	253	Cluster_4	ChpA_family_subclass_B2_metallo-beta-lactamase_ImiS_NG_050415.1_cds_WP_063865298.1_1	Cluster_4	SP_Sec_SPI_	26-27	SP_Sec_SPI_	26-27	N_Y_H_T_D	C	H	.	.
B2_1103	GCF_963892335.1	654	654	Aeromonas_veronii	Bacteria-Pseudomonadota-Gammaproteobacteria-Aeromonadales-Aeromonadaceae-Aeromonas-	4415866	NZ_CAWPXW010000020.1	class_B2	549.2	-	12724	13483	12722	13486	ATGATGAAAGGTTGGATGAAGTGCGGGTTGGCCGGGGCTGTGGTGCTGATGGCGAGTTTCTGGGGTGGCAGCGTGCGGGCGGCGGGGATCTCCCTCAAGCAGGTGAGCGGCCCTGTCTATGTTGTTGAAGATAACTACTACGTCAAAGAGAACTCCATGGTCTATTTCGGGGCCAAGGGGGTGACGGTGGTGGGGGCGACCTGGACGCCGGATACCGCTCGCGAGCTGCATAAGCTCATTAAACGGGTCAGCAGCAAGCCGGTGCTGGAGGTGATCAACACCAACTACCACACCGACCGGGCGGGCGGTAACGCCTACTGGAAGTCCATCGGGGCCAAGGTGGTGGCGACTCGCCAGACCAGGGATCTGATGAAGAGCGACTGGGCCGAGATTGTCGCC…	WP_202005948.1	CphA_family_subclass_B2_metallo-beta-lactamase	MMKGWMKCGLAGAVVLMASFWGGSVRAAGISLKQVSGPVYVVEDNYYVKENSMVYFGAKGVTVVGATWTPDTARELHKLIKRVSSKPVLEVINTNYHTDRAGGNAYWKSIGAKVVATRQTRDLMKSDWAEIVAFTRKGLPEYPDLPLVLPNVVHDGDFTLQEGKVRAFYAGPAHTPDGIFVYFPDEQVLYGNCILKEKLGNLSFANVKEYPQTIERLKAMKLPIKTVIGGHDSPLHGPELIDHYEALIKAAPQS	ORF_OK	TRUE_HIT	mmkgwikcglagavvllasfwggsvraagislkqvsgpvyvvednyyvkensmvyfgakgvtvvgatwtpdtarelhklikrvsskpvlevintnyhtdraggnaywksigakvvatrqtrdlmksdwaeivaftrkglpeypdlplvlpnvvhdgdftlqegkvralyagpahtpdgifvyfpdeqvlygncilkeklgnlsfadvkaypktlerlkalklpiktvigghdsplhgpelidhyealikaaaks	MMKGWMKCGLAGAVVLMASFWGGSVRAAGISLKQVSGPVYVVEDNYYVKENSMVYFGAKGVTVVGATWTPDTARELHKLIKRVSSKPVLEVINTNYHTDRAGGNAYWKSIGAKVVATRQTRDLMKSDWAEIVAFTRKGLPEYPDLPLVLPNVVHDGDFTLQEGKVRAFYAGPAHTPDGIFVYFPDEQVLYGNCILKEKLGNLSFANVKEYPQTIERLKAMKLPIKTVIGGHDSPLHGPELIDHYEALIKAAPQS	1	254	99.6063	0	0	0	254	Cluster_4	ChpA_family_subclass_B2_metallo-beta-lactamase_ImiS_NG_050415.1_cds_WP_063865298.1_1	Cluster_4	SP_Sec_SPI_	27-28	SP_Sec_SPI_	27-28	N_Y_H_T_D	C	H	.	.
B2_1104	GCF_963892885.1	645	645	Aeromonas_salmonicida	Bacteria-Pseudomonadota-Gammaproteobacteria-Aeromonadales-Aeromonadaceae-Aeromonas-	5011504	NZ_CAWQAV010000136.1	class_B2	540.5	-	11024	11780	11019	11780	ATGAAAGGTTGGATAAAGTGCGGGCTGGCCGGAGCTGTGGTGCTGGTGGCGAGTTTCTGGGGCGGCAGCGTGCATGCGGCGGCGATATCGCTCACTCAGGTGAGCGGCCCTGTGTATGTGGTGGAGGACAACTACTACGTCAAAGAGAACTCCATGGTCTATTTCGGGGCCAAGGGAGTGACGGTAGTGGGGGCGACCTGGACGCCGGATACCGCCCGCGAGCTGCACAAGCTGATCAAACGGGTCAGCAACAAGCCTGTGCTGGAGGTGATCAACACCAACTACCACACGGACAGGGCAGGGGGGAACGCCTACTGGAAGTTCATCGGTGCCAAAGTGGTATCGACCCGCCAGACCCGGGAGCTGATGAAGAGCGACTGGGCCGAGATCGTCGCCTTT…	WP_249217822.1	CphA_family_subclass_B2_metallo-beta-lactamase	MKGWIKCGLAGAVVLVASFWGGSVHAAAISLTQVSGPVYVVEDNYYVKENSMVYFGAKGVTVVGATWTPDTARELHKLIKRVSNKPVLEVINTNYHTDRAGGNAYWKFIGAKVVSTRQTRELMKSDWAEIVAFTRKGLPEYPDLPLVLPNVVHDGDFTLQEGKVRAFYAGPAHTPDGIFVYFPDQQVLYGNCILKEKLGNLSFANVKEYPQTIERLKAMKLPIKIVVGGHDSPLHGPELIDHYETLIKAAPQA	ORF_OK	TRUE_HIT	mmkgwikcglagavvllasfwggsvraagislkqvsgpvyvvednyyvkensmvyfgakgvtvvgatwtpdtarelhklikrvsskpvlevintnyhtdraggnaywksigakvvatrqtrdlmksdwaeivaftrkglpeypdlplvlpnvvhdgdftlqegkvralyagpahtpdgifvyfpdeqvlygncilkeklgnlsfadvkaypktlerlkalklpiktvigghdsplhgpelidhyealikaaak	MMKGWIKCGLAGAVVLVASFWGGSVHAAAISLTQVSGPVYVVEDNYYVKENSMVYFGAKGVTVVGATWTPDTARELHKLIKRVSNKPVLEVINTNYHTDRAGGNAYWKFIGAKVVSTRQTRELMKSDWAEIVAFTRKGLPEYPDLPLVLPNVVHDGDFTLQEGKVRAFYAGPAHTPDGIFVYFPDQQVLYGNCILKEKLGNLSFANVKEYPQTIERLKAMKLPIKIVVGGHDSPLHGPELIDHYETLIKAAPQ	1	253	99.2126	0	0	0	253	Cluster_4	ChpA_family_subclass_B2_metallo-beta-lactamase_ImiS_NG_050415.1_cds_WP_063865298.1_1	Cluster_4	SP_Sec_SPI_	26-27	SP_Sec_SPI_	26-27	N_Y_H_T_D	C	H	.	.
B2_1105	GCF_963893045.1	654	654	Aeromonas_veronii	Bacteria-Pseudomonadota-Gammaproteobacteria-Aeromonadales-Aeromonadaceae-Aeromonas-	4564913	NZ_CAWQBZ010000042.1	class_B2	543.6	+	85901	86660	85899	86663	ATGATGAAAGATTGGATAAAGTGCACATTGGCTGGGGCCGTGGTGCTGATGGCGAGTTTTTGGGGCGGCAGCGTGCGGGCGGCGGGGATCGAGCTCAAGCAGGTGAGCGGCCCGGTCTATGTGGTGGAGGATAACTACTACGTCAAAGAGAACTCCATGGTCTATTTCGGGGCCAAGGGGGTGACGGTGGTGGGGGCGACCTGGACGCCGGATACCGCCCGCGAGCTGCACAAGCTGATAAAAAGAGTCAGCAGCAAGCCGGTGCTGGAGGTGATCAACACCAACTACCACACCGACCGGGCGGGCGGTAACGCCTACTGGAAGTCCATCGGGGCCAAGGTGGTGGCGACGCGCCAGACCCGGGATCTGATGAAGAGCGACTGGGCCGAGATTGTCGCC…	WP_206875838.1	CphA_family_subclass_B2_metallo-beta-lactamase	MMKDWIKCTLAGAVVLMASFWGGSVRAAGIELKQVSGPVYVVEDNYYVKENSMVYFGAKGVTVVGATWTPDTARELHKLIKRVSSKPVLEVINTNYHTDRAGGNAYWKSIGAKVVATRQTRDLMKSDWAEIVAFTRKGLPEYPDLPLVLPNVVHDGDFILQEGKVRAFYAGPAHTPDGIFVYFPDEQVLYGNCILKEKLGNLSFANVKEYPQTIERLKAMKLPIKTVIGGHDSPLHGPELIDHYEALIKAAPQS	ORF_OK	TRUE_HIT	mmkgwikcglagavvllasfwggsvraagislkqvsgpvyvvednyyvkensmvyfgakgvtvvgatwtpdtarelhklikrvsskpvlevintnyhtdraggnaywksigakvvatrqtrdlmksdwaeivaftrkglpeypdlplvlpnvvhdgdftlqegkvralyagpahtpdgifvyfpdeqvlygncilkeklgnlsfadvkaypktlerlkalklpiktvigghdsplhgpelidhyealikaaaks	MMKDWIKCTLAGAVVLMASFWGGSVRAAGIELKQVSGPVYVVEDNYYVKENSMVYFGAKGVTVVGATWTPDTARELHKLIKRVSSKPVLEVINTNYHTDRAGGNAYWKSIGAKVVATRQTRDLMKSDWAEIVAFTRKGLPEYPDLPLVLPNVVHDGDFILQEGKVRAFYAGPAHTPDGIFVYFPDEQVLYGNCILKEKLGNLSFANVKEYPQTIERLKAMKLPIKTVIGGHDSPLHGPELIDHYEALIKAAPQS	1	254	99.6063	0	0	0	254	Cluster_4	ChpA_family_subclass_B2_metallo-beta-lactamase_ImiS_NG_050415.1_cds_WP_063865298.1_1	Cluster_4	SP_Sec_SPI_	27-28	SP_Sec_SPI_	27-28	N_Y_H_T_D	C	H	.	.
B2_1106	GCF_963893115.1	196024	196024	Aeromonas_dhakensis	Bacteria-Pseudomonadota-Gammaproteobacteria-Aeromonadales-Aeromonadaceae-Aeromonas-	5093106	NZ_CAWQBJ010000048.1	class_B2	540.4	+	228708	229467	228706	229470	ATGATGAAAGGTTGGATGAAGTGTGGATTGGCCGGGGCCCTGGTGCTGATGGCGAGTTTCTGGGGCGGCAGCGTGCGGGCGGCGGGGATGTCGCTGACGCAGGTGAGCGGCCCTGTGTATGTGGTGGAGGACAACTACTACGTCAAAGAGAACTCCATGGTCTATTTCGGGGCCAAGGGGGTGACGGTGGTGGGGGCCACCTGGACGCCGGATACCGCCCGCGAGCTGCACAAGCTGATCAAACGGGTCAGCCGCAAGCCGGTGCTGGAGGTGATCAACACCAACTACCACACCGATCGGGCGGGCGGTAACGCCTACTGGAAGTCCATCGGGGCCAAGGTAGTGGCGACGCGCCAGACCCGGGATCTGATGAAGAGCGACTGGGCCGAGATTGTCGCC…	WP_215269907.1	CphA_family_subclass_B2_metallo-beta-lactamase	MMKGWMKCGLAGALVLMASFWGGSVRAAGMSLTQVSGPVYVVEDNYYVKENSMVYFGAKGVTVVGATWTPDTARELHKLIKRVSRKPVLEVINTNYHTDRAGGNAYWKSIGAKVVATRQTRDLMKSDWAEIVAFTRKGLPEYPDLPLVLPNVVHDGDFMLQEGKLRAFYAGPAHTPDGIFVYFPDEQVLYGNCILKEKLGNLSFADVKAYPQTLERLKAMKLPIKTVVGGHDSPLHGPELIDHYEALIKAVPQS	ORF_OK	TRUE_HIT	mmkgwikcglagavvllasfwggsvraagislkqvsgpvyvvednyyvkensmvyfgakgvtvvgatwtpdtarelhklikrvsskpvlevintnyhtdraggnaywksigakvvatrqtrdlmksdwaeivaftrkglpeypdlplvlpnvvhdgdftlqegkvralyagpahtpdgifvyfpdeqvlygncilkeklgnlsfadvkaypktlerlkalklpiktvigghdsplhgpelidhyealikaaaks	MMKGWMKCGLAGALVLMASFWGGSVRAAGMSLTQVSGPVYVVEDNYYVKENSMVYFGAKGVTVVGATWTPDTARELHKLIKRVSRKPVLEVINTNYHTDRAGGNAYWKSIGAKVVATRQTRDLMKSDWAEIVAFTRKGLPEYPDLPLVLPNVVHDGDFMLQEGKLRAFYAGPAHTPDGIFVYFPDEQVLYGNCILKEKLGNLSFADVKAYPQTLERLKAMKLPIKTVVGGHDSPLHGPELIDHYEALIKAVPQS	1	254	99.6063	0	0	0	254	Cluster_4	ChpA_family_subclass_B2_metallo-beta-lactamase_ImiS_NG_050415.1_cds_WP_063865298.1_1	Cluster_4	SP_Sec_SPI_	27-28	SP_Sec_SPI_	27-28	N_Y_H_T_D	C	H	.	.
B2_1107	GCF_963893615.1	196024	196024	Aeromonas_dhakensis	Bacteria-Pseudomonadota-Gammaproteobacteria-Aeromonadales-Aeromonadaceae-Aeromonas-	4868133	NZ_CAWQDA010000004.1	class_B2	544.3	+	439931	440690	439929	440693	ATGATGAAAGGTTGGATGAAGTGCACATTGGCCGGAGCCGTGGTGCTGATGGCGAGTTTTTGGGGCGGCAGCGTGCGGGCGGCGGGGATCTCCCTCAAGCAGGTGAGCGGCCCTGTCTATGTGGTGGAGGACAACTACTACGTCAAAGAGAACTCCATGGTCTATTTCGGGGCCAAGGGGGTGACGGTAGTGGGGGCGACCTGGACGCCGGATACCGCCCGCGAGCTGCACAAGCTGATCAAACGGGTCAGCAGCAAGCCGGTGCTGGAGGTGATCAACACCAACTACCACACCGATCGGGCGGGCGGTAACGCCTACTGGAAGTCCATCGGGGCCAAGGTGGTGGCGACGCGCCAGACCCGGGATCTGATGAAGAGCGACTGGGCCGAGATTGTCGCC…	WP_211049694.1	CphA_family_subclass_B2_metallo-beta-lactamase	MMKGWMKCTLAGAVVLMASFWGGSVRAAGISLKQVSGPVYVVEDNYYVKENSMVYFGAKGVTVVGATWTPDTARELHKLIKRVSSKPVLEVINTNYHTDRAGGNAYWKSIGAKVVATRQTRDLMKSDWAEIVAFTRKGLPEYPDLPLVLPNVVHDGDFTLQEGKVRAFYAGPAHTPDGIFVYFPDEQVLYGNCILKEKLGNLSFADVKAYPQTLERLKAMKLPIKAVVGGHDSPLHGPELIDHYEALIKAAPQS	ORF_OK	TRUE_HIT	mmkgwikcglagavvllasfwggsvraagislkqvsgpvyvvednyyvkensmvyfgakgvtvvgatwtpdtarelhklikrvsskpvlevintnyhtdraggnaywksigakvvatrqtrdlmksdwaeivaftrkglpeypdlplvlpnvvhdgdftlqegkvralyagpahtpdgifvyfpdeqvlygncilkeklgnlsfadvkaypktlerlkalklpiktvigghdsplhgpelidhyealikaaaks	MMKGWMKCTLAGAVVLMASFWGGSVRAAGISLKQVSGPVYVVEDNYYVKENSMVYFGAKGVTVVGATWTPDTARELHKLIKRVSSKPVLEVINTNYHTDRAGGNAYWKSIGAKVVATRQTRDLMKSDWAEIVAFTRKGLPEYPDLPLVLPNVVHDGDFTLQEGKVRAFYAGPAHTPDGIFVYFPDEQVLYGNCILKEKLGNLSFADVKAYPQTLERLKAMKLPIKAVVGGHDSPLHGPELIDHYEALIKAAPQS	1	254	99.6063	0	0	0	254	Cluster_4	ChpA_family_subclass_B2_metallo-beta-lactamase_ImiS_NG_050415.1_cds_WP_063865298.1_1	Cluster_4	SP_Sec_SPI_	27-28	SP_Sec_SPI_	27-28	N_Y_H_T_D	C	H	.	.
B2_1108	GCF_963894075.1	196024	196024	Aeromonas_dhakensis	Bacteria-Pseudomonadota-Gammaproteobacteria-Aeromonadales-Aeromonadaceae-Aeromonas-	4814360	NZ_CAWQFG010000008.1	class_B2	537.5	+	7265	8021	7263	8024	ATGAAATCGTGGCTCAAATACGGGCTGGCCGGGGCCGTGGTGCTGATGGCGAGTTTCTGGGGGGGCAGCGTGCGGGCGGCGGGGATGTCGCTGACGCAGGTGAGCGGCCCTGTCTACATTGTCGAAGATAACTACTACGTGCAGGAAAATTCCATGGTCTATTTCGGGGCCAAGGGCGTGACTGTGGTGGGGGCGACCTGGACGCCGGATACCGCCCGCGAGCTGCACAAGCTGATCAAACGGGTCAGCCGCAAGCCGGTGCTGGAGGTGATCAACACCAACTACCACACCGACCGGGCAGGCGGTAACGCCTACTGGAAGTCCATCGGGGCCAAGGTGGTATCGACCCGTCAGACCCGGGACCTGATGAAGAGCGACTGGGCCGAAATCGTGGCCTTT…	WP_213344583.1	CphA_family_subclass_B2_metallo-beta-lactamase	MKSWLKYGLAGAVVLMASFWGGSVRAAGMSLTQVSGPVYIVEDNYYVQENSMVYFGAKGVTVVGATWTPDTARELHKLIKRVSRKPVLEVINTNYHTDRAGGNAYWKSIGAKVVSTRQTRDLMKSDWAEIVAFTRKGLPEYPDLPLVLPNVVHDGYFTLQEGKLRAFYAGPAHTPDGIFVYFPDEQVLYGNCILKEKLGNLSFADVKAYPQTIERLKAMKLPIKTVVGGHDSPLHGPELIDHYEALIKAVPQS	ORF_OK	TRUE_HIT	mkgwikcglagavvllasfwggsvraagislkqvsgpvyvvednyyvkensmvyfgakgvtvvgatwtpdtarelhklikrvsskpvlevintnyhtdraggnaywksigakvvatrqtrdlmksdwaeivaftrkglpeypdlplvlpnvvhdgdftlqegkvralyagpahtpdgifvyfpdeqvlygncilkeklgnlsfadvkaypktlerlkalklpiktvigghdsplhgpelidhyealikaaaks	MKSWLKYGLAGAVVLMASFWGGSVRAAGMSLTQVSGPVYIVEDNYYVQENSMVYFGAKGVTVVGATWTPDTARELHKLIKRVSRKPVLEVINTNYHTDRAGGNAYWKSIGAKVVSTRQTRDLMKSDWAEIVAFTRKGLPEYPDLPLVLPNVVHDGYFTLQEGKLRAFYAGPAHTPDGIFVYFPDEQVLYGNCILKEKLGNLSFADVKAYPQTIERLKAMKLPIKTVVGGHDSPLHGPELIDHYEALIKAVPQS	2	254	99.2126	0	0	0	253	Cluster_4	ChpA_family_subclass_B2_metallo-beta-lactamase_ImiS_NG_050415.1_cds_WP_063865298.1_1	Cluster_4	SP_Sec_SPI_	26-27	SP_Sec_SPI_	26-27	N_Y_H_T_D	C	H	.	.
B2_1109	GCF_963894245.1	196024	196024	Aeromonas_dhakensis	Bacteria-Pseudomonadota-Gammaproteobacteria-Aeromonadales-Aeromonadaceae-Aeromonas-	4728806	NZ_CAWQGE010000010.1	class_B2	538.4	+	901645	902404	901646	902407	ATGAAAGGTTGGATAAAGTGCGGATTGGCCGGGGCCCTGGTGCTGATGGCGAGTTTCTGGGGCGGCAGCGTGCGAGCGGCGGGGATGTCGCTGACGCAGGTGAGCGGCCCTGTCTACGTTGTCGAGGACAACTACTACATACAGGAAAACTCCATGGTCTATTTCGGGGCCAAGGGGGTGACTGTGGTGGGGGCGACCTGGACGCCGGATACCGCCCGCGAGCTGCACAAGCTGATCAAACGGATTAGCAGCAAGCCGGTGCTGGAGGTGATCAACACCAACTACCACACCGACCGGGCGGGTGGTAACGCCTACTGGAAGTCCATCGGGGCCAAGGTGGTGGCGACGCGTCAGACCCGGGATCTGATGAAGAGCGACTGGGCCGAGATCGTCGCCTTT…	WP_257620998.1	CphA_family_subclass_B2_metallo-beta-lactamase	MKGWIKCGLAGALVLMASFWGGSVRAAGMSLTQVSGPVYVVEDNYYIQENSMVYFGAKGVTVVGATWTPDTARELHKLIKRISSKPVLEVINTNYHTDRAGGNAYWKSIGAKVVATRQTRDLMKSDWAEIVAFTRKGLPEYPDLPLVLPNVVHEGDFTLQEGKLRAFYAGPAHTPDGIFVYFPDQQVLYGNCILKEKLGNLSFADVKAYPQTIERLKAMKLPIKTVVGGHDSPLHGPELIDHYEALIKAAPQS	ORF_OK	TRUE_HIT	mmkgwikcglagavvllasfwggsvraagislkqvsgpvyvvednyyvkensmvyfgakgvtvvgatwtpdtarelhklikrvsskpvlevintnyhtdraggnaywksigakvvatrqtrdlmksdwaeivaftrkglpeypdlplvlpnvvhdgdftlqegkvralyagpahtpdgifvyfpdeqvlygncilkeklgnlsfadvkaypktlerlkalklpiktvigghdsplhgpelidhyealikaaaks	MMKGWIKCGLAGALVLMASFWGGSVRAAGMSLTQVSGPVYVVEDNYYIQENSMVYFGAKGVTVVGATWTPDTARELHKLIKRISSKPVLEVINTNYHTDRAGGNAYWKSIGAKVVATRQTRDLMKSDWAEIVAFTRKGLPEYPDLPLVLPNVVHEGDFTLQEGKLRAFYAGPAHTPDGIFVYFPDQQVLYGNCILKEKLGNLSFADVKAYPQTIERLKAMKLPIKTVVGGHDSPLHGPELIDHYEALIKAAPQS	1	254	99.6063	0	0	0	253	Cluster_4	ChpA_family_subclass_B2_metallo-beta-lactamase_ImiS_NG_050415.1_cds_WP_063865298.1_1	Cluster_4	SP_Sec_SPI_	26-27	SP_Sec_SPI_	26-27	N_Y_H_T_D	C	H	.	.
B2_111	GCF_006246555.1	654	654	Aeromonas_veronii	Bacteria-Pseudomonadota-Gammaproteobacteria-Aeromonadales-Aeromonadaceae-Aeromonas-	4404545	NZ_NKXG01000052.1	class_B2	546.3	-	12814	13573	12812	13561	ATGAAGTGCACATTGGCCGGGGCCGTGGTGCTGATGGCGAGTTTCTGGGGCGGCAGCGTGCGGGCGGCGGGGATCTCCCTCAAACAGGTGAGCGGCCCTGTCTATGTGGTGGAGGACAACTACTACGTCAAAGAGAACTCCATGGTCTATTTCGGGGCCAAGGGGGTGACGGTGGTGGGGGCGACCTGGACGCCGGATACCGCCCGCGAGCTGCACAAGCTCATTAAACGGGTCAGCAGCAAGCCGGTGCTGGAGGTGATCAACACCAACTACCACACCGACCGGGCGGGTGGTAACGCCTACTGGAAGTCCATCGGGGCCAAGGTGGTGGCGACCCGCCAGACCCGGGATTTGATGAAGAGCGACTGGGCCGAGATTGTCGCCTTTACCCGCAAGGGG…	WP_236761073.1	CphA_family_subclass_B2_metallo-beta-lactamase	MKCTLAGAVVLMASFWGGSVRAAGISLKQVSGPVYVVEDNYYVKENSMVYFGAKGVTVVGATWTPDTARELHKLIKRVSSKPVLEVINTNYHTDRAGGNAYWKSIGAKVVATRQTRDLMKSDWAEIVAFTRKGLPEYPDLPLVLPNVVHDGDFTLQEGKLRAFYAGPAHTPDGIFVYFPDEQVLYGNCILKEKLGNLSFANVKEYPQTIERLKAMKLPIKTVIGGHDSPLHGPELIDHYEELIKAVPQS	ORF_OK	TRUE_HIT	mmkgwikcglagavvllasfwggsvraagislkqvsgpvyvvednyyvkensmvyfgakgvtvvgatwtpdtarelhklikrvsskpvlevintnyhtdraggnaywksigakvvatrqtrdlmksdwaeivaftrkglpeypdlplvlpnvvhdgdftlqegkvralyagpahtpdgifvyfpdeqvlygncilkeklgnlsfadvkaypktlerlkalklpiktvigghdsplhgpelidhyealikaaaks	MMKSWMKCTLAGAVVLMASFWGGSVRAAGISLKQVSGPVYVVEDNYYVKENSMVYFGAKGVTVVGATWTPDTARELHKLIKRVSSKPVLEVINTNYHTDRAGGNAYWKSIGAKVVATRQTRDLMKSDWAEIVAFTRKGLPEYPDLPLVLPNVVHDGDFTLQEGKLRAFYAGPAHTPDGIFVYFPDEQVLYGNCILKEKLGNLSFANVKEYPQTIERLKAMKLPIKTVIGGHDSPLHGPELIDHYEELIKAVPQS	1	254	99.6063	0	0	0	249	Cluster_4	ChpA_family_subclass_B2_metallo-beta-lactamase_ImiS_NG_050415.1_cds_WP_063865298.1_1	Cluster_4	SP_Sec_SPI_	22-23	SP_Sec_SPI_	22-23	N_Y_H_T_D	C	H	.	.
B2_1110	GCF_963894465.1	196024	196024	Aeromonas_dhakensis	Bacteria-Pseudomonadota-Gammaproteobacteria-Aeromonadales-Aeromonadaceae-Aeromonas-	4895082	NZ_CAWQGM010000012.1	class_B2	536.9	-	16041	16800	16039	16800	ATGAAAGGTTGGATAAAGTGCGGGCTGGCCGGGGCCCTGGTGCTGATGGCGAGTTTCTGGGGTGGCAGCGTGCGGGCGGCGGGGATGTCGCTGACGCAGGTGAGCGGCCCTGTCTATGTTGTCGAGGACAACTACTACATACAGGAAAACTCCATGGTCTATTTCGGGGCCAAGGGGGTGACTGTGGTGGGGGCGACCTGGACGCCAGATACCGCCCGCGAGCTGCACAAGCTGATCAAACGGGTCAGCCGCCAGCCTGTGCTGGAGGTGATCAACACCAACTACCACACCGACCGGGCAGGCGGTAACGCCTACTGGAAGTCCATCGGGGCCAAGGTGGTATCGACCCGTCAGACCCGGGATCTGATGAAGAGCGACTGGGCCGAGATTGTCGCCTTT…	WP_241097950.1	CphA_family_subclass_B2_metallo-beta-lactamase	MKGWIKCGLAGALVLMASFWGGSVRAAGMSLTQVSGPVYVVEDNYYIQENSMVYFGAKGVTVVGATWTPDTARELHKLIKRVSRQPVLEVINTNYHTDRAGGNAYWKSIGAKVVSTRQTRDLMKSDWAEIVAFTRKGLPEYPDLPLVLPNVVHEGDFMLQEGKLRAFYAGPAHTPDGIFVYFPDEQVLYGNCILKEKLGNLSFADVKAYPRTLERLKAMKLPIKTVVGGHDSPLHGPELIDHYEALIKAAPQS	ORF_OK	TRUE_HIT	mmkgwikcglagavvllasfwggsvraagislkqvsgpvyvvednyyvkensmvyfgakgvtvvgatwtpdtarelhklikrvsskpvlevintnyhtdraggnaywksigakvvatrqtrdlmksdwaeivaftrkglpeypdlplvlpnvvhdgdftlqegkvralyagpahtpdgifvyfpdeqvlygncilkeklgnlsfadvkaypktlerlkalklpiktvigghdsplhgpelidhyealikaaaks	MMKGWIKCGLAGALVLMASFWGGSVRAAGMSLTQVSGPVYVVEDNYYIQENSMVYFGAKGVTVVGATWTPDTARELHKLIKRVSRQPVLEVINTNYHTDRAGGNAYWKSIGAKVVSTRQTRDLMKSDWAEIVAFTRKGLPEYPDLPLVLPNVVHEGDFMLQEGKLRAFYAGPAHTPDGIFVYFPDEQVLYGNCILKEKLGNLSFADVKAYPRTLERLKAMKLPIKTVVGGHDSPLHGPELIDHYEALIKAAPQS	1	254	99.6063	0	0	0	253	Cluster_4	ChpA_family_subclass_B2_metallo-beta-lactamase_ImiS_NG_050415.1_cds_WP_063865298.1_1	Cluster_4	SP_Sec_SPI_	26-27	SP_Sec_SPI_	26-27	N_Y_H_T_D	C	H	.	.
B2_1111	GCF_963894795.1	650	650	Aeromonas_jandaei	Bacteria-Pseudomonadota-Gammaproteobacteria-Aeromonadales-Aeromonadaceae-Aeromonas-	4574115	NZ_CAWQHF010000034.1	class_B2	544.2	+	303952	304711	303950	304714	ATGATGAAAGGTTGGATGAAGTGCGGATTGGCCGGGGCCGTGGTGCTGATGGCAAGTTTCTGGGGCGGCAGCGTGCGGGCGGCGGGGATCTCCCTCAAGCAGGTGAGCGGCCCTGTCTATGTGGTGGAGGATAACTACTACGTCAAAGAGAACTCCATGGTCTATTTCGGGGCCAAGGGGGTGACGGTGGTGGGGGCGACCTGGACGCCGGATACCGCTCGCGAGCTGCACAAGCTGATCAAACGGGTCAGCAGCAAGCCGGTGCTGGAGGTGATCAACACCAACTACCACACCGATCGGGCGGGTGGTAACGCCTACTGGAAGTCCATCGGGGCCAAGGTGGTGGCGACACGCCAGACCCGGGATCTGATGAAGAGCGACTGGGCCGAGATTGTCGCC…	WP_219271847.1	CphA_family_subclass_B2_metallo-beta-lactamase	MMKGWMKCGLAGAVVLMASFWGGSVRAAGISLKQVSGPVYVVEDNYYVKENSMVYFGAKGVTVVGATWTPDTARELHKLIKRVSSKPVLEVINTNYHTDRAGGNAYWKSIGAKVVATRQTRDLMKSDWAEIVAFTRKGLPEYPDLPLVLPNVVHDGDFKLQEGKVRAFYAGPAHTPDGIFVYFPDEQVLYGNCILKEKLGNLSFANVKEYPQTIERLKAMKLPIKTVIGGHDSPLHGPELIDHYEELIKAVPQS	ORF_OK	TRUE_HIT	mmkgwikcglagavvllasfwggsvraagislkqvsgpvyvvednyyvkensmvyfgakgvtvvgatwtpdtarelhklikrvsskpvlevintnyhtdraggnaywksigakvvatrqtrdlmksdwaeivaftrkglpeypdlplvlpnvvhdgdftlqegkvralyagpahtpdgifvyfpdeqvlygncilkeklgnlsfadvkaypktlerlkalklpiktvigghdsplhgpelidhyealikaaaks	MMKGWMKCGLAGAVVLMASFWGGSVRAAGISLKQVSGPVYVVEDNYYVKENSMVYFGAKGVTVVGATWTPDTARELHKLIKRVSSKPVLEVINTNYHTDRAGGNAYWKSIGAKVVATRQTRDLMKSDWAEIVAFTRKGLPEYPDLPLVLPNVVHDGDFKLQEGKVRAFYAGPAHTPDGIFVYFPDEQVLYGNCILKEKLGNLSFANVKEYPQTIERLKAMKLPIKTVIGGHDSPLHGPELIDHYEELIKAVPQS	1	254	99.6063	0	0	0	254	Cluster_4	ChpA_family_subclass_B2_metallo-beta-lactamase_ImiS_NG_050415.1_cds_WP_063865298.1_1	Cluster_4	SP_Sec_SPI_	27-28	SP_Sec_SPI_	27-28	N_Y_H_T_D	C	H	.	.
B2_1112	GCF_963895295.1	2854782	2854782	Aeromonas_sp_sia0103	Bacteria-Pseudomonadota-Gammaproteobacteria-Aeromonadales-Aeromonadaceae-Aeromonas-unclassified_Aeromonas-	4557970	NZ_CAWQKG010000004.1	class_B2	503.3	+	55126	55885	55127	55888	ATGAAAGGTTGGATGAAGTGCGGGCTGGCCGGAGCCCTGGTACTGGCGGCGAGTGTCTGGGGCGGCAGCGTGCATGCGGCGGCGATATCGCTCACTCAGGTGAGCGGCCCCGTCTATGTGGTGGAGGATGACTACTACCTCAGGGAGAACTCCATGGTCTACTTCGGCGCTGAGGGGGTGACTGTGGTGGGGGCGACCTGGACGCCGGATACCGCCCGCGAGTTGCACAAGCTTATCAAGAAGGTCAGTCGCAAGCCGGTGCTGGAGGTGATCAACACCAACTACCACACCGATAGGGCCGGCGGTAACGCCTACTGGAAGTCCATCGGCGCGAAAGTGGTCTCGACCCGCCAGACCCGGGATCTGATGCAGAGCGACTGGCAGACCATAGTCGACTTC…	WP_256352001.1	CphA_family_subclass_B2_metallo-beta-lactamase	MKGWMKCGLAGALVLAASVWGGSVHAAAISLTQVSGPVYVVEDDYYLRENSMVYFGAEGVTVVGATWTPDTARELHKLIKKVSRKPVLEVINTNYHTDRAGGNAYWKSIGAKVVSTRQTRDLMQSDWQTIVDFTRKGLPDYPDLPLVLPNEVHDGDFSLQDGKVRAFYLGPAHTPDGIFVYFPDEQVLYGNCILKEKLGNLAFADLKAYPQTLARLKAMKLPLKTIVGGHDSPLHGPELIDHYQALLAEAPRS	ORF_OK	TRUE_HIT	mmkgwikcglagavvllasfwggsvraagislkqvsgpvyvvednyyvkensmvyfgakgvtvvgatwtpdtarelhklikrvsskpvlevintnyhtdraggnaywksigakvvatrqtrdlmksdwaeivaftrkglpeypdlplvlpnvvhdgdftlqegkvralyagpahtpdgifvyfpdeqvlygncilkeklgnlsfadvkaypktlerlkalklpiktvigghdsplhgpelidhyealikaaaks	MMKGWMKCGLAGALVLAASVWGGSVHAAAISLTQVSGPVYVVEDDYYLRENSMVYFGAEGVTVVGATWTPDTARELHKLIKKVSRKPVLEVINTNYHTDRAGGNAYWKSIGAKVVSTRQTRDLMQSDWQTIVDFTRKGLPDYPDLPLVLPNEVHDGDFSLQDGKVRAFYLGPAHTPDGIFVYFPDEQVLYGNCILKEKLGNLAFADLKAYPQTLARLKAMKLPLKTIVGGHDSPLHGPELIDHYQALLAEAPRS	1	254	99.6063	0	0	0	253	Cluster_4	ChpA_family_subclass_B2_metallo-beta-lactamase_ImiS_NG_050415.1_cds_WP_063865298.1_1	Cluster_4	SP_Sec_SPI_	26-27	SP_Sec_SPI_	26-27	N_Y_H_T_D	C	H	.	.
B2_1113	GCF_963895385.1	654	654	Aeromonas_veronii	Bacteria-Pseudomonadota-Gammaproteobacteria-Aeromonadales-Aeromonadaceae-Aeromonas-	4844293	NZ_CAWQKI010000001.1	class_B2	539.2	+	817204	817963	817202	817966	ATGATGAAAGGTTGGATGAAGTGCACATTGGCCGGAGCCGTGGTGCTGATGGCGAGTTTCTGGGGTGGCAGCGTGCGGGCGGCGGGGATCGAGCTCAAGCAGGTGAGCGGCCCTGTCTATGTGGTGGAGGACAACTACTACGTCAAAGAGAACTCCATGGTCTATTTCGGGGCCAAGGGGGTGACGGTGGTGGGGGCGACCTGGACGCCGGATACCGCCCGCGAGCTGCACAAGCTGATCAAACGGGTCAGCAGCAAGCCGGTGCTGGAGGTGATCAACACCAACTACCACACCGATCGGGCGGGCGGTAACGCCTACTGGAAGTCCATCGGGGCCAAGGTGGTGGCGACGCGCCAGACCCGGGATCTGATGAAGAGCGACTGGGCCGAGATTGTCGCC…	WP_224969506.1	CphA_family_subclass_B2_metallo-beta-lactamase	MMKGWMKCTLAGAVVLMASFWGGSVRAAGIELKQVSGPVYVVEDNYYVKENSMVYFGAKGVTVVGATWTPDTARELHKLIKRVSSKPVLEVINTNYHTDRAGGNAYWKSIGAKVVATRQTRDLMKSDWAEIVAFTRKGLPEYPDLPLVLPNVVHDGDFKLQEGKVRAFYAGPAHTPDGIFVYFPDEQVLYGNCILKEKLGNLSFADVKAYPQTIERLKAMKLPIKTVIGGHDSPLHGPELIDHYEELIKAVPQS	ORF_OK	TRUE_HIT	mmkgwikcglagavvllasfwggsvraagislkqvsgpvyvvednyyvkensmvyfgakgvtvvgatwtpdtarelhklikrvsskpvlevintnyhtdraggnaywksigakvvatrqtrdlmksdwaeivaftrkglpeypdlplvlpnvvhdgdftlqegkvralyagpahtpdgifvyfpdeqvlygncilkeklgnlsfadvkaypktlerlkalklpiktvigghdsplhgpelidhyealikaaaks	MMKGWMKCTLAGAVVLMASFWGGSVRAAGIELKQVSGPVYVVEDNYYVKENSMVYFGAKGVTVVGATWTPDTARELHKLIKRVSSKPVLEVINTNYHTDRAGGNAYWKSIGAKVVATRQTRDLMKSDWAEIVAFTRKGLPEYPDLPLVLPNVVHDGDFKLQEGKVRAFYAGPAHTPDGIFVYFPDEQVLYGNCILKEKLGNLSFADVKAYPQTIERLKAMKLPIKTVIGGHDSPLHGPELIDHYEELIKAVPQS	1	254	99.6063	0	0	0	254	Cluster_4	ChpA_family_subclass_B2_metallo-beta-lactamase_ImiS_NG_050415.1_cds_WP_063865298.1_1	Cluster_4	SP_Sec_SPI_	27-28	SP_Sec_SPI_	27-28	N_Y_H_T_D	C	H	.	.
B2_1114	GCF_963895575.1	654	654	Aeromonas_veronii	Bacteria-Pseudomonadota-Gammaproteobacteria-Aeromonadales-Aeromonadaceae-Aeromonas-	4692576	NZ_CAWQKY010000001.1	class_B2	540.9	-	3755437	3756196	3755435	3756199	ATGATGAAAGGTTGGATAAAGTGCGGATTGGCCGGAGCCGTGGTGCTGATGGCGAGTTTCTGGGGTGGCAGCGTGCGGGCGGCGGGGATCGAACTCAAACAGGTGAGCGGCCCTGTCTATGTGGTGGAGGATAACTACTACGTCAAAGAGAACTCCATGGTCTATTTCGGGGCCAAGGGGGTGACGGTGGTGGGGGCGACCTGGACGCCGGATACCGCCCGCGAGCTGCACAAGCTGATCAAACGGGTCAGCAGCAAGCCGGTGCTGGAGGTGATCAACACCAACTACCACACCGACCGGGCGGGCGGTAACGCCTACTGGAAGTCCATTGGGGCCAAGGTGGTGGCGACGCGCCAGACCCGGGATCTGATGAAGAGCGACTGGGCCGAAATTGTCGCC…	WP_227341346.1	CphA_family_subclass_B2_metallo-beta-lactamase	MMKGWIKCGLAGAVVLMASFWGGSVRAAGIELKQVSGPVYVVEDNYYVKENSMVYFGAKGVTVVGATWTPDTARELHKLIKRVSSKPVLEVINTNYHTDRAGGNAYWKSIGAKVVATRQTRDLMKSDWAEIVAFTRKGLPEYPDLPLVLPNVVHDGDFKLQEGKVRAFYAGPAHTPDGIFVYFPDEQVLYGNCILKEKLGNLSFANVKEYPQTIERLKAMKLPIKTVIGGHDSPLHGPELIDHYEALIKAAPQS	ORF_OK	TRUE_HIT	mmkgwikcglagavvllasfwggsvraagislkqvsgpvyvvednyyvkensmvyfgakgvtvvgatwtpdtarelhklikrvsskpvlevintnyhtdraggnaywksigakvvatrqtrdlmksdwaeivaftrkglpeypdlplvlpnvvhdgdftlqegkvralyagpahtpdgifvyfpdeqvlygncilkeklgnlsfadvkaypktlerlkalklpiktvigghdsplhgpelidhyealikaaaks	MMKGWIKCGLAGAVVLMASFWGGSVRAAGIELKQVSGPVYVVEDNYYVKENSMVYFGAKGVTVVGATWTPDTARELHKLIKRVSSKPVLEVINTNYHTDRAGGNAYWKSIGAKVVATRQTRDLMKSDWAEIVAFTRKGLPEYPDLPLVLPNVVHDGDFKLQEGKVRAFYAGPAHTPDGIFVYFPDEQVLYGNCILKEKLGNLSFANVKEYPQTIERLKAMKLPIKTVIGGHDSPLHGPELIDHYEALIKAAPQS	1	254	99.6063	0	0	0	254	Cluster_4	ChpA_family_subclass_B2_metallo-beta-lactamase_ImiS_NG_050415.1_cds_WP_063865298.1_1	Cluster_4	SP_Sec_SPI_	27-28	SP_Sec_SPI_	27-28	N_Y_H_T_D	C	H	.	.
B2_1115	GCF_963896005.1	654	654	Aeromonas_veronii	Bacteria-Pseudomonadota-Gammaproteobacteria-Aeromonadales-Aeromonadaceae-Aeromonas-	4739098	NZ_CAWQMO010000048.1	class_B2	546.5	-	12713	13472	12711	13475	ATGATGAAAGGTTGGATGAAATGCGGGTTGGCCGGAGCCGTGGTGCTGATGGCGAGTTTCTGGGGCGGCAGCGTGCGGGCGGCGGGGATCTCCCTCAAGCAGGTGAGCGGCCCTGTCTATGTGGTGGAGGACAACTACTACGTCAAAGAGAACTCCATGGTCTATTTCGGGGCCAAGGGGGTGACGGTGGTGGGGGCGACCTGGACGCCGGATACCGCCCGCGAGCTGCACAAGCTGATCAAACGGGTCAGCAGCAAGCCGGTGCTGGAGGTGATCAACACCAACTACCACACCGATCGGGCGGGCGGTAACGCCTACTGGAAGTCCATCGGGGCCAAGGTGGTGGCGACGCGCCAGACCCGGGATCTGATGAAGAGCGACTGGGCTGAGATTGTCGCC…	WP_164536143.1	CphA_family_subclass_B2_metallo-beta-lactamase	MMKGWMKCGLAGAVVLMASFWGGSVRAAGISLKQVSGPVYVVEDNYYVKENSMVYFGAKGVTVVGATWTPDTARELHKLIKRVSSKPVLEVINTNYHTDRAGGNAYWKSIGAKVVATRQTRDLMKSDWAEIVAFTRKGLPEYPDLPLVLPNVVHDGDFTLQEGKVRAFYAGPAHTPDGIFVYFPDEQVLYGNCILKEKLGNLSFANVKAYPQTIERLKAMKLPIKTVIGGHDSPLHGPELIDHYEELIKAAPQS	ORF_OK	TRUE_HIT	mmkgwikcglagavvllasfwggsvraagislkqvsgpvyvvednyyvkensmvyfgakgvtvvgatwtpdtarelhklikrvsskpvlevintnyhtdraggnaywksigakvvatrqtrdlmksdwaeivaftrkglpeypdlplvlpnvvhdgdftlqegkvralyagpahtpdgifvyfpdeqvlygncilkeklgnlsfadvkaypktlerlkalklpiktvigghdsplhgpelidhyealikaaaks	MMKGWMKCGLAGAVVLMASFWGGSVRAAGISLKQVSGPVYVVEDNYYVKENSMVYFGAKGVTVVGATWTPDTARELHKLIKRVSSKPVLEVINTNYHTDRAGGNAYWKSIGAKVVATRQTRDLMKSDWAEIVAFTRKGLPEYPDLPLVLPNVVHDGDFTLQEGKVRAFYAGPAHTPDGIFVYFPDEQVLYGNCILKEKLGNLSFANVKAYPQTIERLKAMKLPIKTVIGGHDSPLHGPELIDHYEELIKAAPQS	1	254	99.6063	0	0	0	254	Cluster_4	ChpA_family_subclass_B2_metallo-beta-lactamase_ImiS_NG_050415.1_cds_WP_063865298.1_1	Cluster_4	SP_Sec_SPI_	27-28	SP_Sec_SPI_	27-28	N_Y_H_T_D	C	H	.	.
B2_1116	GCF_963896405.1	654	654	Aeromonas_veronii	Bacteria-Pseudomonadota-Gammaproteobacteria-Aeromonadales-Aeromonadaceae-Aeromonas-	4640721	NZ_CAWQNO010000001.1	class_B2	538.2	-	4352855	4353614	4352853	4353602	ATGAAGTGCACATTGGCCGGAGCCGTGGTGCTGATGGCGAGTTTCTGGGGTGGCAGCGTGCGGGCGGCGGGGATCGAACTCAAACAGGTGAGCGGCCCTGTCTATGTGGTGGAGGACAACTACTACGTCAAAGAGAACTCCATGGTCTATTTCGGGGCCAAGGGGGTGACGGTGGTGGGGGCGACCTGGACGCCGGATACCGCCCGCGAGCTGCACAAGCTGATAAAAAGAGTCAGCAGCAAGCCGGTGCTGGAGGTGATCAACACCAACTACCACACCGACCGGGCGGGCGGTAATGCCTACTGGAAGTCCATCGGGGCCAAGGTGGTGGCGACACGCCAGACCCGGGATCTGATGAAGAGCGACTGGGCCGAGATTGTCGCCTTTACCCGCAAGGGG…	WP_235699017.1	CphA_family_subclass_B2_metallo-beta-lactamase	MKCTLAGAVVLMASFWGGSVRAAGIELKQVSGPVYVVEDNYYVKENSMVYFGAKGVTVVGATWTPDTARELHKLIKRVSSKPVLEVINTNYHTDRAGGNAYWKSIGAKVVATRQTRDLMKSDWAEIVAFTRKGLPEYPDLPLVLPNVVHDGDFTLQEGKVRSFYAGPAHTPDGIFVYFPDEQVLYGNCILKEKLGNLSFANVKAYPQTIERLKAMKLPIKTVIGGHDSPLHGPELIDHYEELIKAVPQS	ORF_OK	TRUE_HIT	mmkgwikcglagavvllasfwggsvraagislkqvsgpvyvvednyyvkensmvyfgakgvtvvgatwtpdtarelhklikrvsskpvlevintnyhtdraggnaywksigakvvatrqtrdlmksdwaeivaftrkglpeypdlplvlpnvvhdgdftlqegkvralyagpahtpdgifvyfpdeqvlygncilkeklgnlsfadvkaypktlerlkalklpiktvigghdsplhgpelidhyealikaaaks	MMKGWMKCTLAGAVVLMASFWGGSVRAAGIELKQVSGPVYVVEDNYYVKENSMVYFGAKGVTVVGATWTPDTARELHKLIKRVSSKPVLEVINTNYHTDRAGGNAYWKSIGAKVVATRQTRDLMKSDWAEIVAFTRKGLPEYPDLPLVLPNVVHDGDFTLQEGKVRSFYAGPAHTPDGIFVYFPDEQVLYGNCILKEKLGNLSFANVKAYPQTIERLKAMKLPIKTVIGGHDSPLHGPELIDHYEELIKAVPQS	1	254	99.6063	0	0	0	249	Cluster_4	ChpA_family_subclass_B2_metallo-beta-lactamase_ImiS_NG_050415.1_cds_WP_063865298.1_1	Cluster_4	SP_Sec_SPI_	22-23	SP_Sec_SPI_	22-23	N_Y_H_T_D	C	H	.	.
B2_1117	GCF_963897045.1	654	654	Aeromonas_veronii	Bacteria-Pseudomonadota-Gammaproteobacteria-Aeromonadales-Aeromonadaceae-Aeromonas-	4521444	NZ_CAWQPP010000012.1	class_B2	546.2	+	135378	136137	135376	136140	ATGATGAAAGGTTGGATGAAGTGCACATTGGCCGGAGCCGTGGTGCTGATGGCGAGTTTCTGGGGTGGCAGCGTGCGGGCGGCGGGGATCTCCCTCAAGCAGGTGAGCGGCCCTGTCTATGTTGTTGAAGATAACTACTACGTAAAGGAAAACTCCATGGTCTATTTCGGGGCCAAGGGGGTGACTGTGGTGGGGGCGACCTGGACGCCGGATACCGCCCGCGAGCTGCACAAGCTGATAAAAAGAGTCAGCAGCAAGCCGGTGCTGGAGGTGATCAACACCAACTACCACACCGATCGGGCGGGCGGTAACGCCTACTGGAAGTCCATCGGGGCCAAGGTGGTGGCGACGCGCCAGACCCGGGATCTGATGAAGAGCGACTGGGCCGAGATTGTCGCC…	WP_083851951.1	CphA_family_subclass_B2_metallo-beta-lactamase	MMKGWMKCTLAGAVVLMASFWGGSVRAAGISLKQVSGPVYVVEDNYYVKENSMVYFGAKGVTVVGATWTPDTARELHKLIKRVSSKPVLEVINTNYHTDRAGGNAYWKSIGAKVVATRQTRDLMKSDWAEIVAFTRKGLPEYPDLPLVLPNVVHDGDFTLQEGKVRAFYAGPAHTPDGIFVYFPDEQVLYGNCILKEKLGNLSFANVKAYPQTIERLKAMKLPIKTVIGGHDSPLHGPELIDHYEELIKAVPQS	ORF_OK	TRUE_HIT	mmkgwikcglagavvllasfwggsvraagislkqvsgpvyvvednyyvkensmvyfgakgvtvvgatwtpdtarelhklikrvsskpvlevintnyhtdraggnaywksigakvvatrqtrdlmksdwaeivaftrkglpeypdlplvlpnvvhdgdftlqegkvralyagpahtpdgifvyfpdeqvlygncilkeklgnlsfadvkaypktlerlkalklpiktvigghdsplhgpelidhyealikaaaks	MMKGWMKCTLAGAVVLMASFWGGSVRAAGISLKQVSGPVYVVEDNYYVKENSMVYFGAKGVTVVGATWTPDTARELHKLIKRVSSKPVLEVINTNYHTDRAGGNAYWKSIGAKVVATRQTRDLMKSDWAEIVAFTRKGLPEYPDLPLVLPNVVHDGDFTLQEGKVRAFYAGPAHTPDGIFVYFPDEQVLYGNCILKEKLGNLSFANVKAYPQTIERLKAMKLPIKTVIGGHDSPLHGPELIDHYEELIKAVPQS	1	254	99.6063	0	0	0	254	Cluster_4	ChpA_family_subclass_B2_metallo-beta-lactamase_ImiS_NG_050415.1_cds_WP_063865298.1_1	Cluster_4	SP_Sec_SPI_	27-28	SP_Sec_SPI_	27-28	N_Y_H_T_D	C	H	.	.
B2_1118	GCF_963897105.1	654	654	Aeromonas_veronii	Bacteria-Pseudomonadota-Gammaproteobacteria-Aeromonadales-Aeromonadaceae-Aeromonas-	4659330	NZ_CAWQPQ010000006.1	class_B2	545.9	-	12700	13459	12698	13462	ATGATGAAAGGTTGGATAAAGTGCACATTGGCCGGAGCCGTGGTGCTGATGGCGAGTTTCTGGGGTGGCAGCGTGCGGGCGGCGGGGATCGAGCTCAAGCAGGTGAGCGGCCCGGTGTATGTGGTGGAGGACAACTACTACGTCAAAGAGAACTCCATGGTCTATTTCGGGGCCAAGGGGGTGACTGTGGTGGGGGCGACCTGGACGCCGGATACCGCCCGCGAGCTGCACAAGCTGATCAAGCGGGTCAGCAGCAAGCCGGTGCTGGAGGTGATCAACACCAACTACCACACCGACCGGGCGGGCGGTAACGCCTACTGGAAGTCCATCGGGGCCAAGGTGGTGGCGACCCGCCAGACCCGGGATCTGATGAAGAGCGACTGGGCCGAGATTGTCGCC…	WP_236287404.1	CphA_family_subclass_B2_metallo-beta-lactamase	MMKGWIKCTLAGAVVLMASFWGGSVRAAGIELKQVSGPVYVVEDNYYVKENSMVYFGAKGVTVVGATWTPDTARELHKLIKRVSSKPVLEVINTNYHTDRAGGNAYWKSIGAKVVATRQTRDLMKSDWAEIVAFTRKGLPEYPDLPLVLPNVVHDGDFTLQEGKVRAFYAGPAHTPDGIFVYFPDEQVLYGNCILKEKLGNLSFANVKAYPQTIERLKAMKLPIKTVIGGHDSPLHGPELIDHYEELIKAAPQS	ORF_OK	TRUE_HIT	mmkgwikcglagavvllasfwggsvraagislkqvsgpvyvvednyyvkensmvyfgakgvtvvgatwtpdtarelhklikrvsskpvlevintnyhtdraggnaywksigakvvatrqtrdlmksdwaeivaftrkglpeypdlplvlpnvvhdgdftlqegkvralyagpahtpdgifvyfpdeqvlygncilkeklgnlsfadvkaypktlerlkalklpiktvigghdsplhgpelidhyealikaaaks	MMKGWIKCTLAGAVVLMASFWGGSVRAAGIELKQVSGPVYVVEDNYYVKENSMVYFGAKGVTVVGATWTPDTARELHKLIKRVSSKPVLEVINTNYHTDRAGGNAYWKSIGAKVVATRQTRDLMKSDWAEIVAFTRKGLPEYPDLPLVLPNVVHDGDFTLQEGKVRAFYAGPAHTPDGIFVYFPDEQVLYGNCILKEKLGNLSFANVKAYPQTIERLKAMKLPIKTVIGGHDSPLHGPELIDHYEELIKAAPQS	1	254	99.6063	0	0	0	254	Cluster_4	ChpA_family_subclass_B2_metallo-beta-lactamase_ImiS_NG_050415.1_cds_WP_063865298.1_1	Cluster_4	SP_Sec_SPI_	27-28	SP_Sec_SPI_	27-28	N_Y_H_T_D	C	H	.	.
B2_1119	GCF_963897145.1	654	654	Aeromonas_veronii	Bacteria-Pseudomonadota-Gammaproteobacteria-Aeromonadales-Aeromonadaceae-Aeromonas-	4506880	NZ_CAWQPO010000010.1	class_B2	540.5	+	133652	134411	133653	134414	ATGAAAGGTTGGATGAAGTGCACATTGGCCGGAGCCGTGGTGCTGATGGCGAGCTTCTGGGGCGGTAGCGTGTGGGCGGCGGGGATCTCCCTTAAGCAGGTGAGCGGCCCAGTCTATGTGGTGGAGGATAACTACTACATACAGGAAAACTCCATGGTCTATTTCGGGGCCAAGGGGGTGACGGTGGTGGGGGCGACCTGGACGCCGGATACCGCCCGCGAGCTGCACAAGCTGATCAAACGGGTCAGCAGCAAGCCGGTGCTGGAGGTGATCAACACCAACTACCACACCGATCGGGCGGGCGGTAACGCCTACTGGAAGTCCATTGGGGCCAAGGTGGTGGCGACGCGCCAGACCCGGGATCTGATGAAGAGCGACTGGGCCGAGATTGTCGCCTTT…	WP_236353998.1	CphA_family_subclass_B2_metallo-beta-lactamase	MKGWMKCTLAGAVVLMASFWGGSVWAAGISLKQVSGPVYVVEDNYYIQENSMVYFGAKGVTVVGATWTPDTARELHKLIKRVSSKPVLEVINTNYHTDRAGGNAYWKSIGAKVVATRQTRDLMKSDWAEIVAFTRKGLPEYPDLPLVLPNVVHDGDFTLQEGKVRAFYAGPAHTPDGIFVYFPDEQVLYGNCILKEKLGNLSFANVKAYPQTIERLKAMKLPIKTVIGGHDSPLHGPELIDHYEELIKAVPQS	ORF_OK	TRUE_HIT	mmkgwikcglagavvllasfwggsvraagislkqvsgpvyvvednyyvkensmvyfgakgvtvvgatwtpdtarelhklikrvsskpvlevintnyhtdraggnaywksigakvvatrqtrdlmksdwaeivaftrkglpeypdlplvlpnvvhdgdftlqegkvralyagpahtpdgifvyfpdeqvlygncilkeklgnlsfadvkaypktlerlkalklpiktvigghdsplhgpelidhyealikaaaks	IMKGWMKCTLAGAVVLMASFWGGSVWAAGISLKQVSGPVYVVEDNYYIQENSMVYFGAKGVTVVGATWTPDTARELHKLIKRVSSKPVLEVINTNYHTDRAGGNAYWKSIGAKVVATRQTRDLMKSDWAEIVAFTRKGLPEYPDLPLVLPNVVHDGDFTLQEGKVRAFYAGPAHTPDGIFVYFPDEQVLYGNCILKEKLGNLSFANVKAYPQTIERLKAMKLPIKTVIGGHDSPLHGPELIDHYEELIKAVPQS	1	254	99.6063	0	0	0	253	Cluster_4	ChpA_family_subclass_B2_metallo-beta-lactamase_ImiS_NG_050415.1_cds_WP_063865298.1_1	Cluster_4	SP_Sec_SPI_	26-27	SP_Sec_SPI_	26-27	N_Y_H_T_D	C	H	.	.
B2_112	GCF_006246595.1	646	646	Aeromonas_sobria	Bacteria-Pseudomonadota-Gammaproteobacteria-Aeromonadales-Aeromonadaceae-Aeromonas-	4637031	NZ_NKXJ01000016.1	class_B2	357.1	+	25114	25612	25082	25615	ATGGTCTATTTCGGGGCCAAGGGAGTGACGGTGCTGGAGGTGATCAACACCAACTACCACACCGACAGGGCGGGGGGTAATGCCTACTGGAAGTCCATCGGTGCCAAGGTGGTGGCGACGCGCCAGACCCGGGATCTGATGAAGAGCGACTGGGCCGAGATTGTCGCCTTTACCCGCAAGGGGCTGCCGGAGTACCCGGAGTTGCCGCTGGTGCTGCCCAACGTGGTGCACGATGGTGACTTCACCCTGCAAGAGGGCAAGGTGCGTGCCTTCTACACAGGCCCGGCCCATACGCCGGACGGCATCTTTGTCTACTTCCCCGACCAGCAGGTGCTCTATGGCAACTGCATCCTCAAGGAGAAGCTGGGCAACCTGAGCTTTGCCAATGTGAAGGCCTAT…	WP_241658252.1	subclass_B2_metallo-beta-lactamase	MVYFGAKGVTVLEVINTNYHTDRAGGNAYWKSIGAKVVATRQTRDLMKSDWAEIVAFTRKGLPEYPELPLVLPNVVHDGDFTLQEGKVRAFYTGPAHTPDGIFVYFPDQQVLYGNCILKEKLGNLSFANVKAYPQTLERLKAMKLPIKTVIGGHDSPLHGPELIDHYEELIKAAPQS	ORF_OK	TRUE_HIT	vlevintnyhtdraggnaywksigakvvatrqtrdlmksdwaeivaftrkglpeypdlplvlpnvvhdgdftlqegkvralyagpahtpdgifvyfpdeqvlygncilkeklgnlsfadvkaypktlerlkalklpiktvigghdsplhgpelidhyealikaaaks	VLEVINTNYHTDRAGGNAYWKSIGAKVVATRQTRDLMKSDWAEIVAFTRKGLPEYPELPLVLPNVVHDGDFTLQEGKVRAFYTGPAHTPDGIFVYFPDQQVLYGNCILKEKLGNLSFANVKAYPQTLERLKAMKLPIKTVIGGHDSPLHGPELIDHYEELIKAAPQS	88	254	65.3543	0	0	0	177	Cluster_17	CLUSTER_NOT_IN_NCBI_AMR_REF_DB	Cluster_16	OTHER	0	OTHER	0	N_Y_H_T_D	C	H	.	.
B2_1120	GCF_963897185.1	654	654	Aeromonas_veronii	Bacteria-Pseudomonadota-Gammaproteobacteria-Aeromonadales-Aeromonadaceae-Aeromonas-	4524038	NZ_CAWQPU010000019.1	class_B2	545.4	+	76302	77061	76300	77064	ATGATGAAAGGTTGGATGAAGTGCACATTGGCCGGGGCCGTGGTGCTGATGGCGAGTTTCTGGGGTGGCAGCGTGCGGGCGGCGGGGATCTCCCTCAAGCAGGTGAGCGGCCCGGTGTATGTGGTGGAGGACAACTACTACGTCAAAGAGAACTCCATGGTCTATTTCGGGGCCAAGGGGGTGACGGTGGTGGGGGCGACCTGGACGCCGGATACCGCCCGCGAGCTGCACAAACTGATCAAACGGGTCAGCAGCAAGCCGGTGCTGGAGGTGATCAACACCAACTACCACACCGACCGGGCGGGTGGTAACGCCTACTGGAAGTCCATCGGGGCCAAGGTGGTGGCGACGCGCCAGACCCGGGATCTGATGAAGAGCGACTGGGCCGAGATTGTCGCC…	WP_236361706.1	CphA_family_subclass_B2_metallo-beta-lactamase	MMKGWMKCTLAGAVVLMASFWGGSVRAAGISLKQVSGPVYVVEDNYYVKENSMVYFGAKGVTVVGATWTPDTARELHKLIKRVSSKPVLEVINTNYHTDRAGGNAYWKSIGAKVVATRQTRDLMKSDWAEIVAFTRKGLPEYPDLPLVLPNVVHDGDFKLQDGKVRAFYAGPAHTPDGIFVYFPDEQVLYGNCILKEKLGNLSFADVKAYPQTIERLKAMKLPIKTVIGGHDSPLHGPELIDHYEELIKAVPQS	ORF_OK	TRUE_HIT	mmkgwikcglagavvllasfwggsvraagislkqvsgpvyvvednyyvkensmvyfgakgvtvvgatwtpdtarelhklikrvsskpvlevintnyhtdraggnaywksigakvvatrqtrdlmksdwaeivaftrkglpeypdlplvlpnvvhdgdftlqegkvralyagpahtpdgifvyfpdeqvlygncilkeklgnlsfadvkaypktlerlkalklpiktvigghdsplhgpelidhyealikaaaks	MMKGWMKCTLAGAVVLMASFWGGSVRAAGISLKQVSGPVYVVEDNYYVKENSMVYFGAKGVTVVGATWTPDTARELHKLIKRVSSKPVLEVINTNYHTDRAGGNAYWKSIGAKVVATRQTRDLMKSDWAEIVAFTRKGLPEYPDLPLVLPNVVHDGDFKLQDGKVRAFYAGPAHTPDGIFVYFPDEQVLYGNCILKEKLGNLSFADVKAYPQTIERLKAMKLPIKTVIGGHDSPLHGPELIDHYEELIKAVPQS	1	254	99.6063	0	0	0	254	Cluster_4	ChpA_family_subclass_B2_metallo-beta-lactamase_ImiS_NG_050415.1_cds_WP_063865298.1_1	Cluster_4	SP_Sec_SPI_	27-28	SP_Sec_SPI_	27-28	N_Y_H_T_D	C	H	.	.
B2_1121	GCF_963897235.1	654	654	Aeromonas_veronii	Bacteria-Pseudomonadota-Gammaproteobacteria-Aeromonadales-Aeromonadaceae-Aeromonas-	4591553	NZ_CAWQQC010000010.1	class_B2	542.6	+	134020	134779	134033	134782	ATGAAGTGCACATTGGCCGGGGCCGTGGCGCTGATGGCGAGTTTCTGGGGTGGCAGCGTGCGGGCGGCGGGGATCGAACTCAAACAGGTGAGCGGCCCTGTCTATGTGGTGGAGGATAACTACTACGTCAAAGAGAACTCCATGGTCTATTTCGGGGCCAAGGGAGTGACTGTGGTGGGGGCGACCTGGACGCCGGATACCGCTCGCGAGCTGCATAAGCTCATTAAACGGGTCAGCAGCAAGCCGGTGCTGGAGGTGATCAACACCAACTACCACACCGACCGGGCGGGCGGTAACGCCTACTGGAAGTCCATCGGCGCCAAGGTGGTGGCGACGCGCCAGACCCGGGATCTGATGAAGAGCGACTGGGCCGAGATTGTCGCCTTTACCCGCAAGGGG…	WP_236281640.1	CphA_family_subclass_B2_metallo-beta-lactamase	MKCTLAGAVALMASFWGGSVRAAGIELKQVSGPVYVVEDNYYVKENSMVYFGAKGVTVVGATWTPDTARELHKLIKRVSSKPVLEVINTNYHTDRAGGNAYWKSIGAKVVATRQTRDLMKSDWAEIVAFTRKGLPEYPDLPLVLPNVVHDGDFKLQEGKVRAFYAGPAHTPDGIFVYFPDEQVLYGNCILKEKLGNLSFANVKAYPQTIERLKAMKLPIKTVIGGHDSPLHGPELIDHYEELIKTAPQS	ORF_OK	TRUE_HIT	mmkgwikcglagavvllasfwggsvraagislkqvsgpvyvvednyyvkensmvyfgakgvtvvgatwtpdtarelhklikrvsskpvlevintnyhtdraggnaywksigakvvatrqtrdlmksdwaeivaftrkglpeypdlplvlpnvvhdgdftlqegkvralyagpahtpdgifvyfpdeqvlygncilkeklgnlsfadvkaypktlerlkalklpiktvigghdsplhgpelidhyealikaaaks	MMKGWMKCTLAGAVALMASFWGGSVRAAGIELKQVSGPVYVVEDNYYVKENSMVYFGAKGVTVVGATWTPDTARELHKLIKRVSSKPVLEVINTNYHTDRAGGNAYWKSIGAKVVATRQTRDLMKSDWAEIVAFTRKGLPEYPDLPLVLPNVVHDGDFKLQEGKVRAFYAGPAHTPDGIFVYFPDEQVLYGNCILKEKLGNLSFANVKAYPQTIERLKAMKLPIKTVIGGHDSPLHGPELIDHYEELIKTAPQS	1	254	99.6063	0	0	0	249	Cluster_4	ChpA_family_subclass_B2_metallo-beta-lactamase_ImiS_NG_050415.1_cds_WP_063865298.1_1	Cluster_4	SP_Sec_SPI_	22-23	SP_Sec_SPI_	22-23	N_Y_H_T_D	C	H	.	.
B2_1122	GCF_963897295.1	654	654	Aeromonas_veronii	Bacteria-Pseudomonadota-Gammaproteobacteria-Aeromonadales-Aeromonadaceae-Aeromonas-	4458145	NZ_CAWQQD010000013.1	class_B2	546.2	-	12700	13459	12698	13462	ATGATGAAAGGTTGGATGAAGTGCACATTGGCCGGGGCCGTGGTGCTGATGGCGAGTTTCTGGGGTGGCAGCGTGCGGGCGGCGGGGATCTCCCTCAAGCAGGTGAGTGGCCCTGTCTATGTGGTGGAGGACAACTACTACGTCAAAGAGAACTCCATGGTCTATTTCGGGGCCAAGGGGGTGACGGTAGTGGGGGCGACCTGGACGCCGGATACCGCCCGCGAGCTGCACAAGCTCATTAAACGGGTCAGCAGCAAGCCGGTGCTGGAGGTGATCAACACCAACTACCACACCGATCGGGCGGGTGGTAATGCCTACTGGAAGTCCATCGGGGCCAAGGTGGTGGCGACGCGCCAGACCCGGGATCTGATGAAGAGCGACTGGGCCGAGATTGTCGCC…	WP_083851951.1	CphA_family_subclass_B2_metallo-beta-lactamase	MMKGWMKCTLAGAVVLMASFWGGSVRAAGISLKQVSGPVYVVEDNYYVKENSMVYFGAKGVTVVGATWTPDTARELHKLIKRVSSKPVLEVINTNYHTDRAGGNAYWKSIGAKVVATRQTRDLMKSDWAEIVAFTRKGLPEYPDLPLVLPNVVHDGDFTLQEGKVRAFYAGPAHTPDGIFVYFPDEQVLYGNCILKEKLGNLSFANVKAYPQTIERLKAMKLPIKTVIGGHDSPLHGPELIDHYEELIKAVPQS	ORF_OK	TRUE_HIT	mmkgwikcglagavvllasfwggsvraagislkqvsgpvyvvednyyvkensmvyfgakgvtvvgatwtpdtarelhklikrvsskpvlevintnyhtdraggnaywksigakvvatrqtrdlmksdwaeivaftrkglpeypdlplvlpnvvhdgdftlqegkvralyagpahtpdgifvyfpdeqvlygncilkeklgnlsfadvkaypktlerlkalklpiktvigghdsplhgpelidhyealikaaaks	MMKGWMKCTLAGAVVLMASFWGGSVRAAGISLKQVSGPVYVVEDNYYVKENSMVYFGAKGVTVVGATWTPDTARELHKLIKRVSSKPVLEVINTNYHTDRAGGNAYWKSIGAKVVATRQTRDLMKSDWAEIVAFTRKGLPEYPDLPLVLPNVVHDGDFTLQEGKVRAFYAGPAHTPDGIFVYFPDEQVLYGNCILKEKLGNLSFANVKAYPQTIERLKAMKLPIKTVIGGHDSPLHGPELIDHYEELIKAVPQS	1	254	99.6063	0	0	0	254	Cluster_4	ChpA_family_subclass_B2_metallo-beta-lactamase_ImiS_NG_050415.1_cds_WP_063865298.1_1	Cluster_4	SP_Sec_SPI_	27-28	SP_Sec_SPI_	27-28	N_Y_H_T_D	C	H	.	.
B2_1123	GCF_963897655.1	654	654	Aeromonas_veronii	Bacteria-Pseudomonadota-Gammaproteobacteria-Aeromonadales-Aeromonadaceae-Aeromonas-	5024381	NZ_CAWQPZ010000006.1	class_B2	548.7	-	12742	13501	12740	13504	ATGATGAAAGGTTGGATGAAGTGCACATTGGCCGGAGCCGTGGTGCTGATGGCGAGTTTTTGGGGTGGCAGCGTGCGGGCGGCGGGGATCTCCCTCAAGCAGGTGAGCGGCCCGGTCTATGTGGTGGAGGACAACTACTACGTCAAAGAGAACTCCATGGTCTATTTCGGGGCCAAGGGGGTGACGGTGGTGGGGGCGACCTGGACGCCGGATACTGCCCGCGAGCTGCACAAGCTCATTAAACGGGTCAGCAGCAAGCCGGTGCTGGAGGTGATCAACACCAACTACCACACCGATCGGGCGGGCGGTAACGCCTACTGGAAGTCCATCGGGGCCAAGGTGGTGGCGACGCGCCAGACCCGGGATCTGATGAAGAGCGACTGGGCCGAGATTGTCGCC…	WP_236767773.1	CphA_family_subclass_B2_metallo-beta-lactamase	MMKGWMKCTLAGAVVLMASFWGGSVRAAGISLKQVSGPVYVVEDNYYVKENSMVYFGAKGVTVVGATWTPDTARELHKLIKRVSSKPVLEVINTNYHTDRAGGNAYWKSIGAKVVATRQTRDLMKSDWAEIVAFTRKGLPEYPDLPLVLPNVVHDGDFKLQEGKVRAFYAGPAHTPDGIFVYFPDEQVLYGNCILKEKLGNLSFANVKAYPQTIERLKAMKLPIKTVIGGHDSPLHGPELIDHYEELIKAAPQS	ORF_OK	TRUE_HIT	mmkgwikcglagavvllasfwggsvraagislkqvsgpvyvvednyyvkensmvyfgakgvtvvgatwtpdtarelhklikrvsskpvlevintnyhtdraggnaywksigakvvatrqtrdlmksdwaeivaftrkglpeypdlplvlpnvvhdgdftlqegkvralyagpahtpdgifvyfpdeqvlygncilkeklgnlsfadvkaypktlerlkalklpiktvigghdsplhgpelidhyealikaaaks	MMKGWMKCTLAGAVVLMASFWGGSVRAAGISLKQVSGPVYVVEDNYYVKENSMVYFGAKGVTVVGATWTPDTARELHKLIKRVSSKPVLEVINTNYHTDRAGGNAYWKSIGAKVVATRQTRDLMKSDWAEIVAFTRKGLPEYPDLPLVLPNVVHDGDFKLQEGKVRAFYAGPAHTPDGIFVYFPDEQVLYGNCILKEKLGNLSFANVKAYPQTIERLKAMKLPIKTVIGGHDSPLHGPELIDHYEELIKAAPQS	1	254	99.6063	0	0	0	254	Cluster_4	ChpA_family_subclass_B2_metallo-beta-lactamase_ImiS_NG_050415.1_cds_WP_063865298.1_1	Cluster_4	SP_Sec_SPI_	27-28	SP_Sec_SPI_	27-28	N_Y_H_T_D	C	H	.	.
B2_1124	GCF_963897865.1	654	654	Aeromonas_veronii	Bacteria-Pseudomonadota-Gammaproteobacteria-Aeromonadales-Aeromonadaceae-Aeromonas-	4472843	NZ_CAWQTW010000006.1	class_B2	542.2	-	12538	13297	12536	13285	ATGAAGTGCACATTGGCCGGGGCCGTGGTGCTGATGGCGAGTTTCTGGGGCGGCAGCGTGCGGGCGGCGGGGATCTCCCTTAAGCAGGTGAGCGGCCCTGTCTATGTGGTTGAAGATAACTACTACGTAAAGGAAAACTCCATGGTCTATTTCGGGGCCAAGGGGGTGACTGTGGTGGGGGCGACCTGGACGCCGGATACCGCCCGCGAGCTGCACAAGCTCATTAAACGGGTCAGCAGCAAGCCGGTGCTGGAGGTGATCAACACCAACTACCACACCGATCGGGCGGGCGGTAACGCCTACTGGAAGTCCATCGGCGCCAAGGTGGTGGCGACGCGCCAGACCCGGGATCTGATGAAGAGCGACTGGGCCGAGATTGTCGCCTTTACCCGCAAGGGG…	WP_236373616.1	CphA_family_subclass_B2_metallo-beta-lactamase	MKCTLAGAVVLMASFWGGSVRAAGISLKQVSGPVYVVEDNYYVKENSMVYFGAKGVTVVGATWTPDTARELHKLIKRVSSKPVLEVINTNYHTDRAGGNAYWKSIGAKVVATRQTRDLMKSDWAEIVAFTRKGLPEYPDLPLVLPNVVHDGDFTLQEGKVRAFYAGPAHTPDGIFVYFPDEQVLYGNCILKEKLGNLSFANVKAYQQTIERLKAMKLPIKTVIGGHDSPLHGPELIDHYEALIKAVPQS	ORF_OK	TRUE_HIT	mmkgwikcglagavvllasfwggsvraagislkqvsgpvyvvednyyvkensmvyfgakgvtvvgatwtpdtarelhklikrvsskpvlevintnyhtdraggnaywksigakvvatrqtrdlmksdwaeivaftrkglpeypdlplvlpnvvhdgdftlqegkvralyagpahtpdgifvyfpdeqvlygncilkeklgnlsfadvkaypktlerlkalklpiktvigghdsplhgpelidhyealikaaaks	MMKGWMKCTLAGAVVLMASFWGGSVRAAGISLKQVSGPVYVVEDNYYVKENSMVYFGAKGVTVVGATWTPDTARELHKLIKRVSSKPVLEVINTNYHTDRAGGNAYWKSIGAKVVATRQTRDLMKSDWAEIVAFTRKGLPEYPDLPLVLPNVVHDGDFTLQEGKVRAFYAGPAHTPDGIFVYFPDEQVLYGNCILKEKLGNLSFANVKAYQQTIERLKAMKLPIKTVIGGHDSPLHGPELIDHYEALIKAVPQS	1	254	99.6063	0	0	0	249	Cluster_4	ChpA_family_subclass_B2_metallo-beta-lactamase_ImiS_NG_050415.1_cds_WP_063865298.1_1	Cluster_4	SP_Sec_SPI_	22-23	SP_Sec_SPI_	22-23	N_Y_H_T_D	C	H	.	.
B2_1125	GCF_963897965.1	654	654	Aeromonas_veronii	Bacteria-Pseudomonadota-Gammaproteobacteria-Aeromonadales-Aeromonadaceae-Aeromonas-	4610239	NZ_CAWQUP010000036.1	class_B2	547.5	-	12724	13483	12722	13486	ATGATGAAAGGTTGGATGAAGTGTGGATTGGCCGGGGCCGTGGTGCTGATGGCGAGTTTCTGGGGGGGCAGCGTGCGGGCAGCGGGGATCGAGCTCAAGCAGGTGAGCGGCCCTGTCTATGTGGTGGAGGACAACTACTACGTCAAAGAGAACTCCATGGTCTATTTCGGGGCCAAGGGGGTGACGGTGGTGGGGGCAACCTGGACGCCGGATACCGCCCGCGAGCTGCACAAGCTCATTAAACGGGTCAGCAGCAAGCCGGTGCTGGAGGTGATCAACACCAACTACCACACCGATCGGGCGGGCGGTAACGCCTACTGGAAGTCCATCGGGGCCAAGGTGGTGGCGACGCGCCAGACCCGGGATCTGATGAAGAGCGACTGGGCCGATATTGTCGCC…	WP_236365328.1	CphA_family_subclass_B2_metallo-beta-lactamase	MMKGWMKCGLAGAVVLMASFWGGSVRAAGIELKQVSGPVYVVEDNYYVKENSMVYFGAKGVTVVGATWTPDTARELHKLIKRVSSKPVLEVINTNYHTDRAGGNAYWKSIGAKVVATRQTRDLMKSDWADIVAFTRKGLPEYPDLPLVLPNVVHDGDFTLQEGKVRAFYAGPAHTPDGIFVYFPDEQVLYGNCILKEKLGNLSFANVKAYPQTIERLKAMKLPIKTVIGGHDSPLHGPELIDHYEELIKAAPQS	ORF_OK	TRUE_HIT	mmkgwikcglagavvllasfwggsvraagislkqvsgpvyvvednyyvkensmvyfgakgvtvvgatwtpdtarelhklikrvsskpvlevintnyhtdraggnaywksigakvvatrqtrdlmksdwaeivaftrkglpeypdlplvlpnvvhdgdftlqegkvralyagpahtpdgifvyfpdeqvlygncilkeklgnlsfadvkaypktlerlkalklpiktvigghdsplhgpelidhyealikaaaks	MMKGWMKCGLAGAVVLMASFWGGSVRAAGIELKQVSGPVYVVEDNYYVKENSMVYFGAKGVTVVGATWTPDTARELHKLIKRVSSKPVLEVINTNYHTDRAGGNAYWKSIGAKVVATRQTRDLMKSDWADIVAFTRKGLPEYPDLPLVLPNVVHDGDFTLQEGKVRAFYAGPAHTPDGIFVYFPDEQVLYGNCILKEKLGNLSFANVKAYPQTIERLKAMKLPIKTVIGGHDSPLHGPELIDHYEELIKAAPQS	1	254	99.6063	0	0	0	254	Cluster_4	ChpA_family_subclass_B2_metallo-beta-lactamase_ImiS_NG_050415.1_cds_WP_063865298.1_1	Cluster_4	SP_Sec_SPI_	27-28	SP_Sec_SPI_	27-28	N_Y_H_T_D	C	H	.	.
B2_1126	GCF_963897975.1	654	654	Aeromonas_veronii	Bacteria-Pseudomonadota-Gammaproteobacteria-Aeromonadales-Aeromonadaceae-Aeromonas-	4535069	NZ_CAWQUB010000001.1	class_B2	540.4	+	832333	833092	832331	833095	ATGATGAAAGGTTGGATGAAGTGTGGATTGGCCGGGGCCGTGGTGCTGATGGCGAGTTTTTGGGGCGGCAGCGTGCGGGCGGCGGGGATCTCCCTCAAGCAGGTAAGCGGCCCTGTCTATGTGGTGGAGGACAACTACTACGTCAAAGAGAACTCCATGGTCTATTTCGGGGCCAAGGGAGTGACGGTAGTGGGGGCGACCTGGACGCCGGATACCGCTCGCGAGCTGCACAAGCTGATAAAAAGAGTCAGCAGCAAGCCGGTGCTGGAGGTGATCAACACCAACTACCACACCGACCGGGCGGGTGGTAATGCCTACTGGAAGTCCATCGGGGCCAAGGTGGTGGCGACGCGCCAGACCCGGGATCTGATGAAGAGCGACTGGGCCGAGATTGTCGCC…	WP_107682689.1	CphA_family_subclass_B2_metallo-beta-lactamase	MMKGWMKCGLAGAVVLMASFWGGSVRAAGISLKQVSGPVYVVEDNYYVKENSMVYFGAKGVTVVGATWTPDTARELHKLIKRVSSKPVLEVINTNYHTDRAGGNAYWKSIGAKVVATRQTRDLMKSDWAEIVAFTRKGLPEYPDLPLVLPNVVHDGDFTLQDGKVRAFYAGPAHTPDGIFVYFPDEQVLYGNCILKEKLGNLSFANVKAYPQTIERLKAMKLPIKTVIGGHDSPLHGPELIDHYEELIKAVPQS	ORF_OK	TRUE_HIT	mmkgwikcglagavvllasfwggsvraagislkqvsgpvyvvednyyvkensmvyfgakgvtvvgatwtpdtarelhklikrvsskpvlevintnyhtdraggnaywksigakvvatrqtrdlmksdwaeivaftrkglpeypdlplvlpnvvhdgdftlqegkvralyagpahtpdgifvyfpdeqvlygncilkeklgnlsfadvkaypktlerlkalklpiktvigghdsplhgpelidhyealikaaaks	MMKGWMKCGLAGAVVLMASFWGGSVRAAGISLKQVSGPVYVVEDNYYVKENSMVYFGAKGVTVVGATWTPDTARELHKLIKRVSSKPVLEVINTNYHTDRAGGNAYWKSIGAKVVATRQTRDLMKSDWAEIVAFTRKGLPEYPDLPLVLPNVVHDGDFTLQDGKVRAFYAGPAHTPDGIFVYFPDEQVLYGNCILKEKLGNLSFANVKAYPQTIERLKAMKLPIKTVIGGHDSPLHGPELIDHYEELIKAVPQS	1	254	99.6063	0	0	0	254	Cluster_4	ChpA_family_subclass_B2_metallo-beta-lactamase_ImiS_NG_050415.1_cds_WP_063865298.1_1	Cluster_4	SP_Sec_SPI_	27-28	SP_Sec_SPI_	27-28	N_Y_H_T_D	C	H	.	.
B2_1127	GCF_963898005.1	654	654	Aeromonas_veronii	Bacteria-Pseudomonadota-Gammaproteobacteria-Aeromonadales-Aeromonadaceae-Aeromonas-	4637233	NZ_CAWQUL010000018.1	class_B2	546.1	+	70504	71263	70502	71266	ATGATGAAAGGTTGGATGAAGTGTGGATTGGCCGGGGCCGTGGTGCTGATGGCGAGTTTCTGGGGCGGCAGCGTGCGGGCGGCGGGGATCGAGCTCAAGCAGGTGAGTGGCCCTGTCTATGTTGTTGAAGATAACTACTACGTAAAGGAAAACTCCATGGTCTATTTCGGGGCCAAGGGGGTGACTGTGGTGGGGGCGACCTGGACGCCGGATACCGCCCGCGAGCTGCACAAGCTGATAAAAAGAGTCAGCAGCAAGCCGGTGCTGGAGGTGATCAACACCAACTACCACACCGATCGGGCGGGCGGTAACGCCTACTGGAAGTCTATCGGGGCCAAGGTGGTGGCGACGCGCCAGACCCGGGATCTGATGAAGAGCGACTGGGCCGAGATTGTCGCC…	WP_236269476.1	CphA_family_subclass_B2_metallo-beta-lactamase	MMKGWMKCGLAGAVVLMASFWGGSVRAAGIELKQVSGPVYVVEDNYYVKENSMVYFGAKGVTVVGATWTPDTARELHKLIKRVSSKPVLEVINTNYHTDRAGGNAYWKSIGAKVVATRQTRDLMKSDWAEIVAFTRKGLPEYPDLPLVLPNVVHDGDFKLQDGKVRAFYAGPAHTPDGIFVYFPDEQVLYGNCILKEKLGNLSFANVKEYPQTIERLKAMKLPIKTVIGGHDSPLHGPELIDHYEELIKAAPQS	ORF_OK	TRUE_HIT	mmkgwikcglagavvllasfwggsvraagislkqvsgpvyvvednyyvkensmvyfgakgvtvvgatwtpdtarelhklikrvsskpvlevintnyhtdraggnaywksigakvvatrqtrdlmksdwaeivaftrkglpeypdlplvlpnvvhdgdftlqegkvralyagpahtpdgifvyfpdeqvlygncilkeklgnlsfadvkaypktlerlkalklpiktvigghdsplhgpelidhyealikaaaks	MMKGWMKCGLAGAVVLMASFWGGSVRAAGIELKQVSGPVYVVEDNYYVKENSMVYFGAKGVTVVGATWTPDTARELHKLIKRVSSKPVLEVINTNYHTDRAGGNAYWKSIGAKVVATRQTRDLMKSDWAEIVAFTRKGLPEYPDLPLVLPNVVHDGDFKLQDGKVRAFYAGPAHTPDGIFVYFPDEQVLYGNCILKEKLGNLSFANVKEYPQTIERLKAMKLPIKTVIGGHDSPLHGPELIDHYEELIKAAPQS	1	254	99.6063	0	0	0	254	Cluster_4	ChpA_family_subclass_B2_metallo-beta-lactamase_ImiS_NG_050415.1_cds_WP_063865298.1_1	Cluster_4	SP_Sec_SPI_	27-28	SP_Sec_SPI_	27-28	N_Y_H_T_D	C	H	.	.
B2_1128	GCF_963898065.1	654	654	Aeromonas_veronii	Bacteria-Pseudomonadota-Gammaproteobacteria-Aeromonadales-Aeromonadaceae-Aeromonas-	4944380	NZ_CAWQUQ010000013.1	class_B2	544.5	-	12446	13205	12444	13208	ATGATGAAAGGTTGGATAAAGTGCACATTGGCCGGGGCCGTGGTGCTGATGGCGAGTTTCTGGGGGGGCAGCGTGCGGGCGGCGGGGATCGAACTCAAACAGGTGAGCGGCCCTGTCTATGTGGTGGAGGATAACTACTACGTCAAAGAGAACTCCATGGTCTATTTCGGGGCCAAGGGGGTGACTGTGGTGGGGGCGACCTGGACGCCAGATACCGCCCGCGAGCTGCACAAGCTGATCAAACGGGTCAGCAGCAAGCCGGTGCTGGAGGTGATCAACACCAACTACCACACCGACCGGGCGGGCGGTAACGCCTACTGGAAGTCCATCGGGGCCAAGGTGGTGGCGACGCGCCAGACCCGGGATCTGATGAAGAGCGACTGGGCCGAGATTGTCGCC…	WP_231719804.1	CphA_family_subclass_B2_metallo-beta-lactamase	MMKGWIKCTLAGAVVLMASFWGGSVRAAGIELKQVSGPVYVVEDNYYVKENSMVYFGAKGVTVVGATWTPDTARELHKLIKRVSSKPVLEVINTNYHTDRAGGNAYWKSIGAKVVATRQTRDLMKSDWAEIVAFTRKGLPEYPDLPLVLPNVVHDGDFTLQEGKLRAFYAGPAHTPDGIFVYFPDEQVLYGNCILKEKLGNLSFANVKAYPQTIERLKAMKLPIKTVIGGHDSPLHGPELIDHYEALIKAAPQS	ORF_OK	TRUE_HIT	mmkgwikcglagavvllasfwggsvraagislkqvsgpvyvvednyyvkensmvyfgakgvtvvgatwtpdtarelhklikrvsskpvlevintnyhtdraggnaywksigakvvatrqtrdlmksdwaeivaftrkglpeypdlplvlpnvvhdgdftlqegkvralyagpahtpdgifvyfpdeqvlygncilkeklgnlsfadvkaypktlerlkalklpiktvigghdsplhgpelidhyealikaaaks	MMKGWIKCTLAGAVVLMASFWGGSVRAAGIELKQVSGPVYVVEDNYYVKENSMVYFGAKGVTVVGATWTPDTARELHKLIKRVSSKPVLEVINTNYHTDRAGGNAYWKSIGAKVVATRQTRDLMKSDWAEIVAFTRKGLPEYPDLPLVLPNVVHDGDFTLQEGKLRAFYAGPAHTPDGIFVYFPDEQVLYGNCILKEKLGNLSFANVKAYPQTIERLKAMKLPIKTVIGGHDSPLHGPELIDHYEALIKAAPQS	1	254	99.6063	0	0	0	254	Cluster_4	ChpA_family_subclass_B2_metallo-beta-lactamase_ImiS_NG_050415.1_cds_WP_063865298.1_1	Cluster_4	SP_Sec_SPI_	27-28	SP_Sec_SPI_	27-28	N_Y_H_T_D	C	H	.	.
B2_1129	GCF_963898355.1	645	645	Aeromonas_salmonicida	Bacteria-Pseudomonadota-Gammaproteobacteria-Aeromonadales-Aeromonadaceae-Aeromonas-	5246560	NZ_CAWQWA010000198.1	class_B2	541.9	+	53384	54140	53385	54146	ATGAAAGGTTGGATAAAGTGCGGGCTGGCCGGAGCTGTGGTGCTGGTGGCGAGTTTCTGGGGCGGCAGCGTGCATGCGGCGGCGATCTCCCTCACTCAGGTGAGCGGCCCCGTCTATGTGGTAGAGGATAACTACTACGTCAAAGAGAACTCCATGGTCTATTTCGGGGCCAAGGGAGTGACGGTAGTGGGGGCGACCTGGACGCCGGATACAGCCCGCGAGCTGCACAAGCTGATCAAGCGGGTCAGCAACAAGCCGGTGCTGGAGGTGATCAACACCAATTACCACACGGACAGGGCAGGGGGGAACGCCTACTGGAAGTCCATCGGTGCCAAGGTGGTGTCGACCCGCCAGACCCGGGATCTGATGAAGAGCGACTGGGCCGAGATCGTCGCCTTT…	WP_339355863.1	CphA_family_subclass_B2_metallo-beta-lactamase	MKGWIKCGLAGAVVLVASFWGGSVHAAAISLTQVSGPVYVVEDNYYVKENSMVYFGAKGVTVVGATWTPDTARELHKLIKRVSNKPVLEVINTNYHTDRAGGNAYWKSIGAKVVSTRQTRDLMKSDWAEIVAFTRKGLPEYPDLPLVLPNVVHDGDFTLQEGKVRAFYAGPAHTPDGIFVYFPDQQVLYGNCILKEKLGNLSFADVKAYPQTLERLKAMKLPIKIVVGGHDSPLHGPELIDHYQALIKAAPQA	ORF_OK	TRUE_HIT	mmkgwikcglagavvllasfwggsvraagislkqvsgpvyvvednyyvkensmvyfgakgvtvvgatwtpdtarelhklikrvsskpvlevintnyhtdraggnaywksigakvvatrqtrdlmksdwaeivaftrkglpeypdlplvlpnvvhdgdftlqegkvralyagpahtpdgifvyfpdeqvlygncilkeklgnlsfadvkaypktlerlkalklpiktvigghdsplhgpelidhyealikaaak	MMKGWIKCGLAGAVVLVASFWGGSVHAAAISLTQVSGPVYVVEDNYYVKENSMVYFGAKGVTVVGATWTPDTARELHKLIKRVSNKPVLEVINTNYHTDRAGGNAYWKSIGAKVVSTRQTRDLMKSDWAEIVAFTRKGLPEYPDLPLVLPNVVHDGDFTLQEGKVRAFYAGPAHTPDGIFVYFPDQQVLYGNCILKEKLGNLSFADVKAYPQTLERLKAMKLPIKIVVGGHDSPLHGPELIDHYQALIKAAPQ	1	253	99.2126	0	0	0	253	Cluster_4	ChpA_family_subclass_B2_metallo-beta-lactamase_ImiS_NG_050415.1_cds_WP_063865298.1_1	Cluster_4	SP_Sec_SPI_	26-27	SP_Sec_SPI_	26-27	N_Y_H_T_D	C	H	.	.
B2_113	GCF_007654995.1	654	654	Aeromonas_veronii	Bacteria-Pseudomonadota-Gammaproteobacteria-Aeromonadales-Aeromonadaceae-Aeromonas-	4517570	NZ_SZVM01000004.1	class_B2	543.5	+	276005	276764	276003	276767	ATGATGAAAAGTTGGATGAAGTGCACATTGGCCGGAGCCGTGGTGCTGATGGCGAGCTTCTGGGGCGGTAGCGTGCGGGCGGCGGGGATCTCCCTTAAGCAGGTGAGCGGCCCAGTCTATGTGGTGGAGGATAACTACTACATACAGGAAAACTCCATGGTCTATTTCGGGGCCAAGGGGGTGACGGTGGTGGGGGCGACCTGGACGCCGGATACCGCCCGCGAGCTGCACAAGCTGATCAAACGGGTCAGCAGCAAGCCGGTGCTGGAGGTGATCAACACCAACTACCACACCGATCGGGCGGGCGGTAACGCCTACTGGAAGTCCATTGGGGCCAAGGTGGTGGCGACGCGCCAGACCCGGGATCTGATGAAGAGCGACTGGGCCGAGATTGTCGCC…	WP_144714169.1	CphA_family_subclass_B2_metallo-beta-lactamase	MMKSWMKCTLAGAVVLMASFWGGSVRAAGISLKQVSGPVYVVEDNYYIQENSMVYFGAKGVTVVGATWTPDTARELHKLIKRVSSKPVLEVINTNYHTDRAGGNAYWKSIGAKVVATRQTRDLMKSDWAEIVAFTRKGLPEYPDLPLVLPNVVHDGDFTLQEGKVRAFYAGPAHTPDGIFVYFPDEQVLYGNCILKEKLGNLSFANVKAYPQTIERLKAMKLPIKTVIGGHDSPLHGPELIDHYEELIKAVPQS	ORF_OK	TRUE_HIT	mmkgwikcglagavvllasfwggsvraagislkqvsgpvyvvednyyvkensmvyfgakgvtvvgatwtpdtarelhklikrvsskpvlevintnyhtdraggnaywksigakvvatrqtrdlmksdwaeivaftrkglpeypdlplvlpnvvhdgdftlqegkvralyagpahtpdgifvyfpdeqvlygncilkeklgnlsfadvkaypktlerlkalklpiktvigghdsplhgpelidhyealikaaaks	MMKSWMKCTLAGAVVLMASFWGGSVRAAGISLKQVSGPVYVVEDNYYIQENSMVYFGAKGVTVVGATWTPDTARELHKLIKRVSSKPVLEVINTNYHTDRAGGNAYWKSIGAKVVATRQTRDLMKSDWAEIVAFTRKGLPEYPDLPLVLPNVVHDGDFTLQEGKVRAFYAGPAHTPDGIFVYFPDEQVLYGNCILKEKLGNLSFANVKAYPQTIERLKAMKLPIKTVIGGHDSPLHGPELIDHYEELIKAVPQS	1	254	99.6063	0	0	0	254	Cluster_4	ChpA_family_subclass_B2_metallo-beta-lactamase_ImiS_NG_050415.1_cds_WP_063865298.1_1	Cluster_4	SP_Sec_SPI_	27-28	SP_Sec_SPI_	27-28	N_Y_H_T_D	C	H	.	.
B2_1130	GCF_963899005.1	654	654	Aeromonas_veronii	Bacteria-Pseudomonadota-Gammaproteobacteria-Aeromonadales-Aeromonadaceae-Aeromonas-	4534419	NZ_CAWQXT010000037.1	class_B2	546.1	+	175193	175952	175191	175955	ATGATGAAAGGTTGGATGAAGTGCACATTGGCCGGGGCCGTGGTGCTGATGGCGAGTTTCTGGGGCGGCAGCGTGCGGGCGGCGGGGATTTCCCTCAAGCAGGTGAGCGGCCCTGTTTACGTGGTTGAAGATAACTACTACGTAAAGGAAAACTCCATGGTCTATTTCGGGGCCAAAGGGGTGACGGTGGTGGGGGCGACCTGGACGCCGGATACCGCACGCGAGTTGCACAAGCTGATCAAACGGGTCAGCAGCAAGCCGGTGCTGGAGGTGATCAACACCAACTACCACACCGATCGGGCGGGCGGTAACGCCTACTGGAAGTCCATCGGCGCCAAGGTGGTGGCGACGCGCCAGACCCGTGATCTGATGAAGAGCGACTGGGCCGAGATTGTCACC…	WP_081394711.1	CphA_family_subclass_B2_metallo-beta-lactamase	MMKGWMKCTLAGAVVLMASFWGGSVRAAGISLKQVSGPVYVVEDNYYVKENSMVYFGAKGVTVVGATWTPDTARELHKLIKRVSSKPVLEVINTNYHTDRAGGNAYWKSIGAKVVATRQTRDLMKSDWAEIVTFTRKGLPEYPDLPLVLPNVVHDGDFTLQEGKVRAFYAGPAHTPDGIFVYFPDEQVLYGNCILKEKLGNLSFANVKAYPQTIERLKAMKLPIKTVIGGHDSPLHGPELIDHYEELIKAAPQS	ORF_OK	TRUE_HIT	mmkgwikcglagavvllasfwggsvraagislkqvsgpvyvvednyyvkensmvyfgakgvtvvgatwtpdtarelhklikrvsskpvlevintnyhtdraggnaywksigakvvatrqtrdlmksdwaeivaftrkglpeypdlplvlpnvvhdgdftlqegkvralyagpahtpdgifvyfpdeqvlygncilkeklgnlsfadvkaypktlerlkalklpiktvigghdsplhgpelidhyealikaaaks	MMKGWMKCTLAGAVVLMASFWGGSVRAAGISLKQVSGPVYVVEDNYYVKENSMVYFGAKGVTVVGATWTPDTARELHKLIKRVSSKPVLEVINTNYHTDRAGGNAYWKSIGAKVVATRQTRDLMKSDWAEIVTFTRKGLPEYPDLPLVLPNVVHDGDFTLQEGKVRAFYAGPAHTPDGIFVYFPDEQVLYGNCILKEKLGNLSFANVKAYPQTIERLKAMKLPIKTVIGGHDSPLHGPELIDHYEELIKAAPQS	1	254	99.6063	0	0	0	254	Cluster_4	ChpA_family_subclass_B2_metallo-beta-lactamase_ImiS_NG_050415.1_cds_WP_063865298.1_1	Cluster_4	SP_Sec_SPI_	27-28	SP_Sec_SPI_	27-28	N_Y_H_T_D	C	H	.	.
B2_1131	GCF_963899305.1	2923421	2923421	Aeromonas_sp_MR19	Bacteria-Pseudomonadota-Gammaproteobacteria-Aeromonadales-Aeromonadaceae-Aeromonas-unclassified_Aeromonas-	4844436	NZ_CAWQWZ010000032.1	class_B2	531.1	+	290399	291155	290400	291161	ATGAAAGGTTGGATAAAGTGCGGGCTGGCCGGGGCCCTGGTGTTGATGGCGAGTTTCTGGGGCGGCAGCGTGCATGCGGCGGCTATCTCCCTCACTCAGGTGAGCGGCCCCGTCTATGTGGTGGAGGACAACTACTACGTCAAAGAGAACTCCATGGTCTATTTCGGGGCCAAGGGGGTGACGGTAGTGGGGGCGACCTGGACGCCGGATACCGCCCGCGAGCTGCACAAGCTGATCAAGCGGGTCAGCAGCAAGCCCGTGCTGGAGGTGATCAACACCAACTATCACACCGACAGGGCGGGGGGTAACGCCTACTGGAAGTCCATCGGCGCCAGGGTGGTATCGACCCGCCAGACCCGGGATCTGATGAAGAGCGACTGGGCCGAAATTGTCGCCTTT…	WP_043135519.1	CphA_family_subclass_B2_metallo-beta-lactamase	MKGWIKCGLAGALVLMASFWGGSVHAAAISLTQVSGPVYVVEDNYYVKENSMVYFGAKGVTVVGATWTPDTARELHKLIKRVSSKPVLEVINTNYHTDRAGGNAYWKSIGARVVSTRQTRDLMKSDWAEIVAFTRKGLPEYPDLPLVLPNEVHDGDFTLQEGKVRAFYAGPAHTPDGIFVYFPEEQVLYGNCILKEKLGNLSFADVKAYPQTLARLKAMKLPIKIVVGGHDSPLHGPELIDHYETLIKAAPQV	ORF_OK	TRUE_HIT	mmkgwikcglagavvllasfwggsvraagislkqvsgpvyvvednyyvkensmvyfgakgvtvvgatwtpdtarelhklikrvsskpvlevintnyhtdraggnaywksigakvvatrqtrdlmksdwaeivaftrkglpeypdlplvlpnvvhdgdftlqegkvralyagpahtpdgifvyfpdeqvlygncilkeklgnlsfadvkaypktlerlkalklpiktvigghdsplhgpelidhyealikaaak	MMKGWIKCGLAGALVLMASFWGGSVHAAAISLTQVSGPVYVVEDNYYVKENSMVYFGAKGVTVVGATWTPDTARELHKLIKRVSSKPVLEVINTNYHTDRAGGNAYWKSIGARVVSTRQTRDLMKSDWAEIVAFTRKGLPEYPDLPLVLPNEVHDGDFTLQEGKVRAFYAGPAHTPDGIFVYFPEEQVLYGNCILKEKLGNLSFADVKAYPQTLARLKAMKLPIKIVVGGHDSPLHGPELIDHYETLIKAAPQ	1	253	99.2126	0	0	0	253	Cluster_4	ChpA_family_subclass_B2_metallo-beta-lactamase_ImiS_NG_050415.1_cds_WP_063865298.1_1	Cluster_4	SP_Sec_SPI_	26-27	SP_Sec_SPI_	26-27	N_Y_H_T_D	C	H	.	.
B2_1132	GCF_963899385.1	2923419	2923419	Aeromonas_sp_MR7	Bacteria-Pseudomonadota-Gammaproteobacteria-Aeromonadales-Aeromonadaceae-Aeromonas-unclassified_Aeromonas-	4817270	NZ_CAWQXH010000049.1	class_B2	528.7	+	249751	250507	249752	250513	ATGAAAGGTTGGATAAAGTGCGGGCTGGCCGGTGCCCTGGTGCTGGTGGCGAGTTTCTGGGGCGGTAGCGTGCATGCGGCCGCGATCTCCCTCACTCAGGTGAGTGGCCCCGTGTATGTGGTTGAAGACAACTACTATGTACAGGAAAACTCCATGGTCTATTTCGGGGCCAAAGGGGTGACGGTAGTGGGGGCGACCTGGACGCCGGATACCGCCCGCGAGCTGCACAAACTGATCAAGCGGGTCAGCAGCAAGCCTGTGCTGGAGGTGATCAACACCAACTACCATACCGACAGGGCGGGTGGTAACGCCTACTGGAAGTCCATCGGCGCCAGGGTGGTATCGACCCGCCAGACCCGGGATCTGATGAAGAGCGACTGGACCGAGATTGTTGCCTTT…	WP_241325781.1	CphA_family_subclass_B2_metallo-beta-lactamase	MKGWIKCGLAGALVLVASFWGGSVHAAAISLTQVSGPVYVVEDNYYVQENSMVYFGAKGVTVVGATWTPDTARELHKLIKRVSSKPVLEVINTNYHTDRAGGNAYWKSIGARVVSTRQTRDLMKSDWTEIVAFTRKGLPEYPDLPLVLPNVVHDGYFTLQEGKVRAFYAGPAHTPDGIFVYFPDEQVLYGNCILKEKLGNLSFADVKAYPQTLARLKAMKLPIKVVVGGHDSPLHGPELIDHYEALIKAAPQA	ORF_OK	TRUE_HIT	mmkgwikcglagavvllasfwggsvraagislkqvsgpvyvvednyyvkensmvyfgakgvtvvgatwtpdtarelhklikrvsskpvlevintnyhtdraggnaywksigakvvatrqtrdlmksdwaeivaftrkglpeypdlplvlpnvvhdgdftlqegkvralyagpahtpdgifvyfpdeqvlygncilkeklgnlsfadvkaypktlerlkalklpiktvigghdsplhgpelidhyealikaaak	MMKGWIKCGLAGALVLVASFWGGSVHAAAISLTQVSGPVYVVEDNYYVQENSMVYFGAKGVTVVGATWTPDTARELHKLIKRVSSKPVLEVINTNYHTDRAGGNAYWKSIGARVVSTRQTRDLMKSDWTEIVAFTRKGLPEYPDLPLVLPNVVHDGYFTLQEGKVRAFYAGPAHTPDGIFVYFPDEQVLYGNCILKEKLGNLSFADVKAYPQTLARLKAMKLPIKVVVGGHDSPLHGPELIDHYEALIKAAPQ	1	253	99.2126	0	0	0	253	Cluster_4	ChpA_family_subclass_B2_metallo-beta-lactamase_ImiS_NG_050415.1_cds_WP_063865298.1_1	Cluster_4	SP_Sec_SPI_	26-27	SP_Sec_SPI_	26-27	N_Y_H_T_D	C	H	.	.
B2_1133	GCF_963900055.1	196024	196024	Aeromonas_dhakensis	Bacteria-Pseudomonadota-Gammaproteobacteria-Aeromonadales-Aeromonadaceae-Aeromonas-	4822576	NZ_CAWRCT010000184.1	class_B2	546.3	+	1728	2487	1729	2490	ATGAAAGGTTGGATAAAGTGCGGATTGGCCGGGGCCCTGGTGCTGATGGCGAGTTTCTGGGGTGGTAGCGTGCGAGCGGCGGGGATGTCGCTGACGCAGGTAAGCGGCCCTGTCTATGTGGTGGAGGACAACTACTACGTCAAAGAGAACTCCATGGTCTATTTCGGGGTCAAGGGGGTGACGGTAGTGGGGGCAACCTGGACGCCGGATACCGCCCGCGAGCTGCACAAGCTCATTAAACGGGTCAGCAGCAAGCCGGTGCTGGAGGTGATCAACACCAACTACCACACCGACCGAGCGGGCGGTAACGCCTACTGGAAGTCCATCGGGGCCAAGGTGGTATCGACCCGTCAGACCCGGGATCTGATGAAGAGCGACTGGGCTGAGATTGTCGCCTTT…	WP_244367008.1	CphA_family_subclass_B2_metallo-beta-lactamase	MKGWIKCGLAGALVLMASFWGGSVRAAGMSLTQVSGPVYVVEDNYYVKENSMVYFGVKGVTVVGATWTPDTARELHKLIKRVSSKPVLEVINTNYHTDRAGGNAYWKSIGAKVVSTRQTRDLMKSDWAEIVAFTRKGLPEYPDLPLVLPNVVHDGDFTLQEGKLRAFYAGPAHTPDGIFVYFPDEQVLYGNCILKEKLGNLSFANVKEYPQTIERLKAMKLPIKTVVGGHDSPLHGPELIDHYEALIKAAPQS	ORF_OK	TRUE_HIT	mmkgwikcglagavvllasfwggsvraagislkqvsgpvyvvednyyvkensmvyfgakgvtvvgatwtpdtarelhklikrvsskpvlevintnyhtdraggnaywksigakvvatrqtrdlmksdwaeivaftrkglpeypdlplvlpnvvhdgdftlqegkvralyagpahtpdgifvyfpdeqvlygncilkeklgnlsfadvkaypktlerlkalklpiktvigghdsplhgpelidhyealikaaaks	MMKGWIKCGLAGALVLMASFWGGSVRAAGMSLTQVSGPVYVVEDNYYVKENSMVYFGVKGVTVVGATWTPDTARELHKLIKRVSSKPVLEVINTNYHTDRAGGNAYWKSIGAKVVSTRQTRDLMKSDWAEIVAFTRKGLPEYPDLPLVLPNVVHDGDFTLQEGKLRAFYAGPAHTPDGIFVYFPDEQVLYGNCILKEKLGNLSFANVKEYPQTIERLKAMKLPIKTVVGGHDSPLHGPELIDHYEALIKAAPQS	1	254	99.6063	0	0	0	253	Cluster_4	ChpA_family_subclass_B2_metallo-beta-lactamase_ImiS_NG_050415.1_cds_WP_063865298.1_1	Cluster_4	SP_Sec_SPI_	26-27	SP_Sec_SPI_	26-27	N_Y_H_T_D	C	H	.	.
B2_1134	GCF_963900105.1	654	654	Aeromonas_veronii	Bacteria-Pseudomonadota-Gammaproteobacteria-Aeromonadales-Aeromonadaceae-Aeromonas-	4407499	NZ_CAWRDN010000038.1	class_B2	545.1	-	12532	13291	12530	13294	ATGATGAAAGGTTGGATGAAGTGCACATTGGCCGGGGCCGTGGTGCTGATGGCGAGTTTCTGGGGCGGCAGCGTGCGGGCGGCGGGGATCTCCCTCAAACAGGTGAGCGGCCCTGTCTATGTGGTGGAGGATAACTACTACGTCAAAGAGAACTCCATGGTCTATTTCGGGGCCAAGGGAGTGACGGTGGTGGGGGCGACCTGGACGCCGGATACTGCTCGCGAGCTGCACAAGCTGATTAAACGGGTCAGCAGCAAGCCGGTGCTGGAGGTGATCAACACCAACTACCACACCGACCGGGCGGGCGGTAACGCCTACTGGAAGTCCATCGGGGCCAAGGTGGTGGCGACGCGCCAGACCCGGGATCTGATGAAGAGCGACTGGGCCGAGATTGTCGCC…	WP_083851951.1	CphA_family_subclass_B2_metallo-beta-lactamase	MMKGWMKCTLAGAVVLMASFWGGSVRAAGISLKQVSGPVYVVEDNYYVKENSMVYFGAKGVTVVGATWTPDTARELHKLIKRVSSKPVLEVINTNYHTDRAGGNAYWKSIGAKVVATRQTRDLMKSDWAEIVAFTRKGLPEYPDLPLVLPNVVHDGDFTLQEGKVRAFYAGPAHTPDGIFVYFPDEQVLYGNCILKEKLGNLSFANVKAYPQTIERLKAMKLPIKTVIGGHDSPLHGPELIDHYEELIKAVPQS	ORF_OK	TRUE_HIT	mmkgwikcglagavvllasfwggsvraagislkqvsgpvyvvednyyvkensmvyfgakgvtvvgatwtpdtarelhklikrvsskpvlevintnyhtdraggnaywksigakvvatrqtrdlmksdwaeivaftrkglpeypdlplvlpnvvhdgdftlqegkvralyagpahtpdgifvyfpdeqvlygncilkeklgnlsfadvkaypktlerlkalklpiktvigghdsplhgpelidhyealikaaaks	MMKGWMKCTLAGAVVLMASFWGGSVRAAGISLKQVSGPVYVVEDNYYVKENSMVYFGAKGVTVVGATWTPDTARELHKLIKRVSSKPVLEVINTNYHTDRAGGNAYWKSIGAKVVATRQTRDLMKSDWAEIVAFTRKGLPEYPDLPLVLPNVVHDGDFTLQEGKVRAFYAGPAHTPDGIFVYFPDEQVLYGNCILKEKLGNLSFANVKAYPQTIERLKAMKLPIKTVIGGHDSPLHGPELIDHYEELIKAVPQS	1	254	99.6063	0	0	0	254	Cluster_4	ChpA_family_subclass_B2_metallo-beta-lactamase_ImiS_NG_050415.1_cds_WP_063865298.1_1	Cluster_4	SP_Sec_SPI_	27-28	SP_Sec_SPI_	27-28	N_Y_H_T_D	C	H	.	.
B2_1135	GCF_963900125.1	645	645	Aeromonas_salmonicida	Bacteria-Pseudomonadota-Gammaproteobacteria-Aeromonadales-Aeromonadaceae-Aeromonas-	4706728	NZ_CAWREN010000092.1	class_B2	535.3	-	11130	11886	11125	11886	ATGAAAGGTTGGATAAAGTGCGGGCTGGCCGGAGCTCTGGTGCTGGTGGCGAGTTTCTGGGGCGGCAGCGTGCATGCGGCGGCGATCTCCCTCACTCAGGTGAGCGGCCCCGTGTACGTCGTAGAAGATAACTATTACGTCAAAGAGAACTCCATGGTCTATTTCGGGGCCAAGGGAGTGACTGTGGTGGGGGCGACCTGGACGCCGGATACCGCCCGCGAGCTGCACAAGCTGATCAAACGGGTCAGCAACAAGCCTGTGCTGGAGGTGATCAACACCAACTACCACACCGACCGGGCGGGCGGTAACGCCTACTGGAAGTTCATCGGGGCCAAGGTGGTGGCGACGCGCCAGACCCGGGATCTGATGAAGAGCGACTGGGCCGAGATTGTTGCCTTT…	WP_239497630.1	CphA_family_subclass_B2_metallo-beta-lactamase	MKGWIKCGLAGALVLVASFWGGSVHAAAISLTQVSGPVYVVEDNYYVKENSMVYFGAKGVTVVGATWTPDTARELHKLIKRVSNKPVLEVINTNYHTDRAGGNAYWKFIGAKVVATRQTRDLMKSDWAEIVAFTRKGLPEYPDLPLVLPNVVHDGDFTLQEGKVRAFYLGPAHTPDGIFVYFPDQQVLYGNCILKEKLGNLSFADVKAYPQTLERLKAMKLPIKIVVGGHDSPLHGPELIDHYQALIKAAPQA	ORF_OK	TRUE_HIT	mmkgwikcglagavvllasfwggsvraagislkqvsgpvyvvednyyvkensmvyfgakgvtvvgatwtpdtarelhklikrvsskpvlevintnyhtdraggnaywksigakvvatrqtrdlmksdwaeivaftrkglpeypdlplvlpnvvhdgdftlqegkvralyagpahtpdgifvyfpdeqvlygncilkeklgnlsfadvkaypktlerlkalklpiktvigghdsplhgpelidhyealikaaak	MMKGWIKCGLAGALVLVASFWGGSVHAAAISLTQVSGPVYVVEDNYYVKENSMVYFGAKGVTVVGATWTPDTARELHKLIKRVSNKPVLEVINTNYHTDRAGGNAYWKFIGAKVVATRQTRDLMKSDWAEIVAFTRKGLPEYPDLPLVLPNVVHDGDFTLQEGKVRAFYLGPAHTPDGIFVYFPDQQVLYGNCILKEKLGNLSFADVKAYPQTLERLKAMKLPIKIVVGGHDSPLHGPELIDHYQALIKAAPQ	1	253	99.2126	0	0	0	253	Cluster_4	ChpA_family_subclass_B2_metallo-beta-lactamase_ImiS_NG_050415.1_cds_WP_063865298.1_1	Cluster_4	SP_Sec_SPI_	26-27	SP_Sec_SPI_	26-27	N_Y_H_T_D	C	H	.	.
B2_1136	GCF_963900615.1	645	645	Aeromonas_salmonicida	Bacteria-Pseudomonadota-Gammaproteobacteria-Aeromonadales-Aeromonadaceae-Aeromonas-	4934557	NZ_CAWRDK010000004.1	class_B2	536.6	+	86509	87265	86510	87271	ATGAAAGGTTGGATAAAGTGCGGGCTGGCCGGAGCTGTGGTGCTGGTGGCGAGTTTCTGGGGCGGCAGCGTGCATGCGGCGGCGATCTCCCTCACTCAGGTAAGCGGCCCTGTCTATGTGGTGGAGGATAACTACTACGTCAAAGAGAACTCCATGGTTTATTTCGGAGCCAAGGGAGTGACGATAGTGGGGGCGACCTGGACGCCGGATACCGCCCGCGAGCTGCACAAGCTGATCAAACGGGTCAGCAACAAGCCTGTGCTGGAGGTGATCAACACCAACTACCACACGGACAGGGCAGGGGGTAACGCCTACTGGAAGTCCATCGGTGCCAAGGTGGTCTCGACCCGCCAGACCCGGGATCTGATGAAGAGCGACTGGGCCGAGATCGTCGCCTTT…	WP_005320513.1	CphA_family_subclass_B2_metallo-beta-lactamase	MKGWIKCGLAGAVVLVASFWGGSVHAAAISLTQVSGPVYVVEDNYYVKENSMVYFGAKGVTIVGATWTPDTARELHKLIKRVSNKPVLEVINTNYHTDRAGGNAYWKSIGAKVVSTRQTRDLMKSDWAEIVAFTRKGLPEYPDLPLVLPNVVHDGDFNLQEGKVRAFYAGPAHTPDGIFVYFPDQQVLYGNCILKEKLGNLSFADVKAYPQTLERLKAMKLPIKIVVGGHDSPLHGPELIDHYQALIKAAPQA	ORF_OK	TRUE_HIT	mmkgwikcglagavvllasfwggsvraagislkqvsgpvyvvednyyvkensmvyfgakgvtvvgatwtpdtarelhklikrvsskpvlevintnyhtdraggnaywksigakvvatrqtrdlmksdwaeivaftrkglpeypdlplvlpnvvhdgdftlqegkvralyagpahtpdgifvyfpdeqvlygncilkeklgnlsfadvkaypktlerlkalklpiktvigghdsplhgpelidhyealikaaak	MMKGWIKCGLAGAVVLVASFWGGSVHAAAISLTQVSGPVYVVEDNYYVKENSMVYFGAKGVTIVGATWTPDTARELHKLIKRVSNKPVLEVINTNYHTDRAGGNAYWKSIGAKVVSTRQTRDLMKSDWAEIVAFTRKGLPEYPDLPLVLPNVVHDGDFNLQEGKVRAFYAGPAHTPDGIFVYFPDQQVLYGNCILKEKLGNLSFADVKAYPQTLERLKAMKLPIKIVVGGHDSPLHGPELIDHYQALIKAAPQ	1	253	99.2126	0	0	0	253	Cluster_4	ChpA_family_subclass_B2_metallo-beta-lactamase_ImiS_NG_050415.1_cds_WP_063865298.1_1	Cluster_4	SP_Sec_SPI_	26-27	SP_Sec_SPI_	26-27	N_Y_H_T_D	C	H	.	.
B2_1137	GCF_963901125.1	656	656	Aeromonas_allosaccharophila	Bacteria-Pseudomonadota-Gammaproteobacteria-Aeromonadales-Aeromonadaceae-Aeromonas-	4513594	NZ_CAWRGL010000002.1	class_B2	540.4	+	130970	131729	130968	131732	ATGATGACAGGTTGGATGAAGTGCGGATTGGCCGGGGCCGTGGTGCTGATGGCGAGTTTCTGGGGTGGCAGCGTGCGGGCGGCGGGGATGTCGCTGACGCAGGTAAGCGGCCCTGTCTATGTGGTGGAAGATAACTACTACATACAGGAAAACTCCATGGTCTATTTCGGGGCCAAGGGGGTGACTGTGGTGGGGGCGACCTGGACGCCGGATACCGCCCGCGAGCTGCACAAGCTGATCAAACGGGTCAGCAGCAAGCCGGTACTGGAGGTGATCAATACCAACTACCACACCGACCGGGCAGGCGGTAACGCTTACTGGAAGTCCATCGGTGCCAAGGTGGTGGCGACGCGCCAGACCCGGGATCTGATGAAGAGCGACTGGGCCGAGATTGTCGCC…	WP_139707548.1	CphA_family_subclass_B2_metallo-beta-lactamase	MMTGWMKCGLAGAVVLMASFWGGSVRAAGMSLTQVSGPVYVVEDNYYIQENSMVYFGAKGVTVVGATWTPDTARELHKLIKRVSSKPVLEVINTNYHTDRAGGNAYWKSIGAKVVATRQTRDLMKSDWAEIVAFTRKGLPEYPDLPLVLPNVVHDGDFTLQDGKVRAFYAGQAHTPDGIFVYFPDEQVLYGNCILKEKLGNLSFANVKAYPQTIERLKAMKLPIKTVIGGHDSPLHGPELIDHYEELIKAVPQS	ORF_OK	TRUE_HIT	mmkgwikcglagavvllasfwggsvraagislkqvsgpvyvvednyyvkensmvyfgakgvtvvgatwtpdtarelhklikrvsskpvlevintnyhtdraggnaywksigakvvatrqtrdlmksdwaeivaftrkglpeypdlplvlpnvvhdgdftlqegkvralyagpahtpdgifvyfpdeqvlygncilkeklgnlsfadvkaypktlerlkalklpiktvigghdsplhgpelidhyealikaaaks	MMTGWMKCGLAGAVVLMASFWGGSVRAAGMSLTQVSGPVYVVEDNYYIQENSMVYFGAKGVTVVGATWTPDTARELHKLIKRVSSKPVLEVINTNYHTDRAGGNAYWKSIGAKVVATRQTRDLMKSDWAEIVAFTRKGLPEYPDLPLVLPNVVHDGDFTLQDGKVRAFYAGQAHTPDGIFVYFPDEQVLYGNCILKEKLGNLSFANVKAYPQTIERLKAMKLPIKTVIGGHDSPLHGPELIDHYEELIKAVPQS	1	254	99.6063	0	0	0	254	Cluster_4	ChpA_family_subclass_B2_metallo-beta-lactamase_ImiS_NG_050415.1_cds_WP_063865298.1_1	Cluster_4	SP_Sec_SPI_	27-28	SP_Sec_SPI_	27-28	N_Y_H_T_D	C	H	.	.
B2_1138	GCF_964031645.1	105751	105751	Aeromonas_bestiarum	Bacteria-Pseudomonadota-Gammaproteobacteria-Aeromonadales-Aeromonadaceae-Aeromonas-	4784056	NZ_CAXIQV010000026.1	class_B2	529.9	-	10879	11635	10874	11635	ATGAAAGGTTGGATAAAGTGCGGGCTGGCCGGGGCTGTGGTGCTGGTGGCGAGCTTCTGGGGCGGCAGCGTGCATGCGGCGGCGATATCGCTGACGCAGGTGAGTGGCCCCGTGTATGTGGTTGAAGACAACTACTACGTCAAGGAGAACGCCATGGTCTATTTCGGGGCCAAGGGAGTGACTGTGGTGGGGGCGACCTGGACGCCGGATACAGCTCGCGAGCTGCACAAGCTGATCAAACGGGTCAGCCGCAAGCCCGTGCTGGAGGTGATCAACACCAACTACCACACCGACAGGGCGGGGGGGAATGCCTACTGGAAGTCCATCGGCGCCAGGGTGGTATCGACCCGCCAGACCCGGGATCTGATGAAGAGCGACTGGGCCGAGATTGTCGCCTTT…	WP_348686552.1	CphA_family_subclass_B2_metallo-beta-lactamase	MKGWIKCGLAGAVVLVASFWGGSVHAAAISLTQVSGPVYVVEDNYYVKENAMVYFGAKGVTVVGATWTPDTARELHKLIKRVSRKPVLEVINTNYHTDRAGGNAYWKSIGARVVSTRQTRDLMKSDWAEIVAFTHKGLPEYPDLPLVLPNEVHDGDFTLQEGKVRAFYAGPAHTPDGIFVYFPEEQVLYGNCILKEKLGNLSFADVKAYPQTLERLKAMKLPIKVVVGGHDSPLHGPELIDHYEALIKAAPQA	ORF_OK	TRUE_HIT	mmkgwikcglagavvllasfwggsvraagislkqvsgpvyvvednyyvkensmvyfgakgvtvvgatwtpdtarelhklikrvsskpvlevintnyhtdraggnaywksigakvvatrqtrdlmksdwaeivaftrkglpeypdlplvlpnvvhdgdftlqegkvralyagpahtpdgifvyfpdeqvlygncilkeklgnlsfadvkaypktlerlkalklpiktvigghdsplhgpelidhyealikaaak	MMKGWIKCGLAGAVVLVASFWGGSVHAAAISLTQVSGPVYVVEDNYYVKENAMVYFGAKGVTVVGATWTPDTARELHKLIKRVSRKPVLEVINTNYHTDRAGGNAYWKSIGARVVSTRQTRDLMKSDWAEIVAFTHKGLPEYPDLPLVLPNEVHDGDFTLQEGKVRAFYAGPAHTPDGIFVYFPEEQVLYGNCILKEKLGNLSFADVKAYPQTLERLKAMKLPIKVVVGGHDSPLHGPELIDHYEALIKAAPQ	1	253	99.2126	0	0	0	253	Cluster_4	ChpA_family_subclass_B2_metallo-beta-lactamase_ImiS_NG_050415.1_cds_WP_063865298.1_1	Cluster_4	SP_Sec_SPI_	26-27	SP_Sec_SPI_	26-27	N_Y_H_T_D	C	H	.	.
B2_1139	GCF_964032045.1	105751	105751	Aeromonas_bestiarum	Bacteria-Pseudomonadota-Gammaproteobacteria-Aeromonadales-Aeromonadaceae-Aeromonas-	4611089	NZ_CAXIRY010000023.1	class_B2	528.6	-	10879	11635	10874	11635	ATGAAAGGTTGGATAAAGTGCGGGCTGGCCGGGGCTGTGGTGCTGGTGGCGAGCTTCTGGGGCGGCAGCGTGCATGCGGCGGCGATATCGCTGACGCAGGTGAGTGGCCCCGTGTATGTGGTTGAAGACAACTACTACGTCAAGGAGAACGCCATGGTCTATTTCGGGGCCAAGGGAGTGACTGTGGTGGGGGCGACCTGGACGCCGGATACAGCTCGCGAGCTGCACAAGCTGATCAAACGGGTCAGCCGCAAGCCCGTGCTGGAGGTGATCAACACCAACTACCACACCGACAGGGCGGGGGGGAATGCCTACTGGAAGTCCATCGGCGCCAGGGTGGTATCGACCCGCCAGACCCGGGATCTGATGAAGAGCGACTGGGCCGAGATTGTCGCCTTT…	WP_348686552.1	CphA_family_subclass_B2_metallo-beta-lactamase	MKGWIKCGLAGAVVLVASFWGGSVHAAAISLTQVSGPVYVVEDNYYVKENAMVYFGAKGVTVVGATWTPDTARELHKLIKRVSRKPVLEVINTNYHTDRAGGNAYWKSIGARVVSTRQTRDLMKSDWAEIVAFTHKGLPEYPDLPLVLPNEVHDGDFTLQEGKVRAFYAGPAHTPDGIFVYFPEEQVLYGNCILKEKLGNLSFADVKAYPQTLERLKAMKLPIKVVVGGHDSPLHGPELIDHYEALIKAAPQA	ORF_OK	TRUE_HIT	mmkgwikcglagavvllasfwggsvraagislkqvsgpvyvvednyyvkensmvyfgakgvtvvgatwtpdtarelhklikrvsskpvlevintnyhtdraggnaywksigakvvatrqtrdlmksdwaeivaftrkglpeypdlplvlpnvvhdgdftlqegkvralyagpahtpdgifvyfpdeqvlygncilkeklgnlsfadvkaypktlerlkalklpiktvigghdsplhgpelidhyealikaaak	MMKGWIKCGLAGAVVLVASFWGGSVHAAAISLTQVSGPVYVVEDNYYVKENAMVYFGAKGVTVVGATWTPDTARELHKLIKRVSRKPVLEVINTNYHTDRAGGNAYWKSIGARVVSTRQTRDLMKSDWAEIVAFTHKGLPEYPDLPLVLPNEVHDGDFTLQEGKVRAFYAGPAHTPDGIFVYFPEEQVLYGNCILKEKLGNLSFADVKAYPQTLERLKAMKLPIKVVVGGHDSPLHGPELIDHYEALIKAAPQ	1	253	99.2126	0	0	0	253	Cluster_4	ChpA_family_subclass_B2_metallo-beta-lactamase_ImiS_NG_050415.1_cds_WP_063865298.1_1	Cluster_4	SP_Sec_SPI_	26-27	SP_Sec_SPI_	26-27	N_Y_H_T_D	C	H	.	.
B2_114	GCF_008086875.1	646	646	Aeromonas_sobria	Bacteria-Pseudomonadota-Gammaproteobacteria-Aeromonadales-Aeromonadaceae-Aeromonas-	4912126	NZ_VEMU01000042.1	class_B2	544.9	+	866	1625	864	1628	ATGATGAAAGGTTGGATGAAGTGCGGGCTGGCCGGAGCCGTGGTGCTGATGGCGAGTTTCTGGGGTGGCAGCGTGCGGGCGGCGGGGATCGAACTCAAGCAGGTGAGCGGCCCCGTGTATGTTGTTGAAGATAACTACTACGTCAAAGAGAACTCCATGGTCTATTTCGGGGCCAAGGGGGTGACGGTAGTGGGGGCGACCTGGACGCCGGATACCGCCCGCGAGCTGCACAAGCTGATCAAACGGGTCAGCAGCAAGCCGGTGCTGGAGGTGATCAACACCAACTACCACACCGACAGGGCGGGCGGTAACGCCTACTGGAAGTCCATCGGGGCCAAGGTGGTGGCGACTCGCCAGACCCGGGATCTGATGAAGAGCGACTGGGCCGAGATTGTCGCC…	WP_148612517.1	CphA_family_subclass_B2_metallo-beta-lactamase	MMKGWMKCGLAGAVVLMASFWGGSVRAAGIELKQVSGPVYVVEDNYYVKENSMVYFGAKGVTVVGATWTPDTARELHKLIKRVSSKPVLEVINTNYHTDRAGGNAYWKSIGAKVVATRQTRDLMKSDWAEIVAFTRKGLPEYPDLPRVLPNVVHDGDFTLQEGKVRAFYAGPAHTSDGIFVYFPDEQVLYGNCILKEKLGNLSFANVKEYPQTIERLKAMQLPIKTVIGGHDSPLHGPELIDHYEELIKAVPQS	ORF_OK	TRUE_HIT	mmkgwikcglagavvllasfwggsvraagislkqvsgpvyvvednyyvkensmvyfgakgvtvvgatwtpdtarelhklikrvsskpvlevintnyhtdraggnaywksigakvvatrqtrdlmksdwaeivaftrkglpeypdlplvlpnvvhdgdftlqegkvralyagpahtpdgifvyfpdeqvlygncilkeklgnlsfadvkaypktlerlkalklpiktvigghdsplhgpelidhyealikaaaks	MMKGWMKCGLAGAVVLMASFWGGSVRAAGIELKQVSGPVYVVEDNYYVKENSMVYFGAKGVTVVGATWTPDTARELHKLIKRVSSKPVLEVINTNYHTDRAGGNAYWKSIGAKVVATRQTRDLMKSDWAEIVAFTRKGLPEYPDLPRVLPNVVHDGDFTLQEGKVRAFYAGPAHTSDGIFVYFPDEQVLYGNCILKEKLGNLSFANVKEYPQTIERLKAMQLPIKTVIGGHDSPLHGPELIDHYEELIKAVPQS	1	254	99.6063	0	0	0	254	Cluster_4	ChpA_family_subclass_B2_metallo-beta-lactamase_ImiS_NG_050415.1_cds_WP_063865298.1_1	Cluster_4	SP_Sec_SPI_	27-28	SP_Sec_SPI_	27-28	N_Y_H_T_D	C	H	.	.
B2_1140	GCF_000952105.1	536	536	Chromobacterium_violaceum	Bacteria-Pseudomonadota-Betaproteobacteria-Neisseriales-Chromobacteriaceae-Chromobacterium-	4859603	NZ_JYGI01000004.1	class_B2	357.8	+	39008	39749	39009	39776	ATGCGCACAGTATTTGGATTCGCCGGCGCGCTGTTGGGCCTGGCGGCCGCCGCCTGCGCGGCGCAGGGCGGCCTGGCTCTCAAGCACCTGAAGGGCGGCGTGTACGTGGTGGAGGATGGCTATTACGCCAAGGAGAACTCGGTGGTCTATGTCGGCGCGGAGCACGTGACCGTGGTGGGCGCCACCTGGACGCCGGATACGGCCCGAGAGCTGGCGCGGCAGATACGCGCGGTCACCGACAAGCCGATCGCGGAAGTGGTCAATCCCAATTATCACCCCGACCGCGCCGGAGGGAACGCATACTGGAAGTCCATCGGCGCCCGCATCGTGTCGACCCGGCAGACCGCCGACGAGATGCGCCGGGGGTGGGACGAGGTCGTCGCCTTCACCCGCCGCGGC…	WP_043598132.1	CVI_family_subclass_B2_metallo-beta-lactamase	MRTVFGFAGALLGLAAAACAAQGGLALKHLKGGVYVVEDGYYAKENSVVYVGAEHVTVVGATWTPDTARELARQIRAVTDKPIAEVVNPNYHPDRAGGNAYWKSIGARIVSTRQTADEMRRGWDEVVAFTRRGFPDYPALPVSLPDREHPGDFELQDGRIKAFHLGAAHTRDGIFVHFPQERVLYGNCILKQELGNLSYADLNEYPKTLERLKLSELDFDTVIAGHLDALHGPELIDHYQRLLKRQASDAAAERS	ORF_OK	TRUE_HIT	kgwikcglagavvllasfwggsvraagislkqvsgpvyvvednyyvkensmvyfgakgvtvvgatwtpdtarelhklikrvsskpvlevintnyhtdraggnaywksigakvvatrqtrdlmksdwaeivaftrkglpeypdlplvlpnvvhdgdftlqegkvralyagpahtpdgifvyfpdeqvlygncilkeklgnlsfadvkaypktlerlkalklpiktvigghdsplhgpelidhyealikaaa	KMRTVFGFAGALLGLAAAAC--AAQGGLALKHLKGGVYVVEDGYYAKENSVVYVGAEHVTVVGATWTPDTARELARQIRAVTDKPIAEVVNPNYHPDRAGGNAYWKSIGARIVSTRQTADEMRRGWDEVVAFTRRGFPDYPALPVSLPDREHPGDFELQDGRIKAFHLGAAHTRDGIFVHFPQERVLYGNCILKQELGNLSYADLNEYPKTLERLKLSELDFDTVIAGHLDALHGPELIDHYQRLLKRQA	3	252	98.0315	0	2	0	255	Cluster_2	CLUSTER_NOT_IN_NCBI_AMR_REF_DB	Cluster_2	LIPO_Sec_SPII_	18-19	LIPO_Sec_SPII_	18-19	N_Y_H_P_D	C	H	.	.
B2_1141	GCF_000963645.1	644	644	Aeromonas_hydrophila	Bacteria-Pseudomonadota-Gammaproteobacteria-Aeromonadales-Aeromonadaceae-Aeromonas-	4908265	NZ_CP011100.1	class_B2	536.5	-	4204804	4205563	4204802	4205563	ATGAAAGGTTGGATAAAGTGCGGGCTGGCCGGGGCCGTGGTGCTGATGGCGAGTTTCTGGGGTGGCAGCGTGCGGGCGGCGGGGATGTCGCTGACGCAGGTGAGCGGCCCGGTTTATGTGGTGGAGGACAACTACTACGTCAAAGAGAACTCCATGGTCTATTTCGGGGCCAAGGGAGTGACTGTGGTGGGGGCGACCTGGACGCCGGATACCGCCCGCGAGCTGCACAAGCTGATCAAACGGGTCAGCCGCAAGCCGGTGCTGGAGGTGATCAACACCAACTACCACACCGATCGGGCGGGCGGTAACGCCTACTGGAAGTCCATCGGTGCCAAGGTGGTGGCGACGCGCCAGACCCGGGATCTGATGAAGAGCGACTGGGCCGAGATCGTCGCCTTT…	WP_045790630.1	CphA_family_subclass_B2_metallo-beta-lactamase	MKGWIKCGLAGAVVLMASFWGGSVRAAGMSLTQVSGPVYVVEDNYYVKENSMVYFGAKGVTVVGATWTPDTARELHKLIKRVSRKPVLEVINTNYHTDRAGGNAYWKSIGAKVVATRQTRDLMKSDWAEIVAFTRKGLPEYPDLPLVLPNVVHEGDFTLQEGKLRAFYAGPAHTPDGIFVYFPDQQVLYGNCILKETLGNLSFADVKAYPQTIERLKAMKLPIKTVVGGHDSPLHGPELIDHYEALIKAVPQS	ORF_OK	TRUE_HIT	mmkgwikcglagavvllasfwggsvraagislkqvsgpvyvvednyyvkensmvyfgakgvtvvgatwtpdtarelhklikrvsskpvlevintnyhtdraggnaywksigakvvatrqtrdlmksdwaeivaftrkglpeypdlplvlpnvvhdgdftlqegkvralyagpahtpdgifvyfpdeqvlygncilkeklgnlsfadvkaypktlerlkalklpiktvigghdsplhgpelidhyealikaaaks	MMKGWIKCGLAGAVVLMASFWGGSVRAAGMSLTQVSGPVYVVEDNYYVKENSMVYFGAKGVTVVGATWTPDTARELHKLIKRVSRKPVLEVINTNYHTDRAGGNAYWKSIGAKVVATRQTRDLMKSDWAEIVAFTRKGLPEYPDLPLVLPNVVHEGDFTLQEGKLRAFYAGPAHTPDGIFVYFPDQQVLYGNCILKETLGNLSFADVKAYPQTIERLKAMKLPIKTVVGGHDSPLHGPELIDHYEALIKAVPQS	1	254	99.6063	0	0	0	253	Cluster_4	ChpA_family_subclass_B2_metallo-beta-lactamase_ImiS_NG_050415.1_cds_WP_063865298.1_1	Cluster_4	SP_Sec_SPI_	26-27	SP_Sec_SPI_	26-27	N_Y_H_T_D	C	H	.	.
B2_1142	GCF_000971335.1	1108595	1108595	Chromobacterium_vaccinii	Bacteria-Pseudomonadota-Betaproteobacteria-Neisseriales-Chromobacteriaceae-Chromobacterium-	4967635	NZ_JZJL01000041.1	class_B2	362	+	37007	37739	36996	37769	ATGCACAGAATATTTAAATTTGCCGGCGCGATGCTGGGCCTGGCGCTGGCGGCCGGGGCCTGCGCGGCGCAGGGCAGCCTGAGCCTCAAGCACCTGAAGGGCGGCGTGTACGTGGTGGAAGACGACTATTACGCCAAGGAGAACTCGGCGGTATACGTCGGCGCGGAGCATGTGACCGTGGTGGGCGCCACCTGGACGCCGGACACCGCCCGCGAGCTGGCGCGGCAAATACGCGCGGTCACCGACAAGCCCATCGCCGAGGTGATCAATCCCAACTATCACACCGACCGGGCCGGCGGCAACGCGTACTGGAAGTCGATCGGCGCCCGCATCGTCGCCACCCGGCAGACGGTCGACGAGATGAGCCGCGGCTGGGACGACATCGTCGCTTTTACCCGG…	WP_235429325.1	subclass_B2_metallo-beta-lactamase	MHRIFKFAGAMLGLALAAGACAAQGSLSLKHLKGGVYVVEDDYYAKENSAVYVGAEHVTVVGATWTPDTARELARQIRAVTDKPIAEVINPNYHTDRAGGNAYWKSIGARIVATRQTVDEMSRGWDDIVAFTRQGFPDYPALPASMPDRVFPGDFELQGGKVKAFHLGAAHTRDGIFVYFPEEKVLYGNCILKQELGNLHYADLNEYPKTLDRLALSGLDIDTVIAGHLDALHGPELIDHYRQLLRRQASDAAAQAR	ORF_OK	TRUE_HIT	kcglagavvllasfwggsvraagislkqvsgpvyvvednyyvkensmvyfgakgvtvvgatwtpdtarelhklikrvsskpvlevintnyhtdraggnaywksigakvvatrqtrdlmksdwaeivaftrkglpeypdlplvlpnvvhdgdftlqegkvralyagpahtpdgifvyfpdeqvlygncilkeklgnlsfadvkaypktlerlkalklpiktvigghdsplhgpelidhyealikaa	IFKFAGAMLGLALAAGACAAQGSLSLKHLKGGVYVVEDDYYAKENSAVYVGAEHVTVVGATWTPDTARELARQIRAVTDKPIAEVINPNYHTDRAGGNAYWKSIGARIVATRQTVDEMSRGWDDIVAFTRQGFPDYPALPASMPDRVFPGDFELQGGKVKAFHLGAAHTRDGIFVYFPEEKVLYGNCILKQELGNLHYADLNEYPKTLDRLALSGLDIDTVIAGHLDALHGPELIDHYRQLLRRQ	7	251	96.063	0	0	0	257	Cluster_2	CLUSTER_NOT_IN_NCBI_AMR_REF_DB	Cluster_2	LIPO_Sec_SPII_	20-21	LIPO_Sec_SPII_	20-21	N_Y_H_T_D	C	H	.	.
B2_1143	GCF_000971355.1	1108595	1108595	Chromobacterium_vaccinii	Bacteria-Pseudomonadota-Betaproteobacteria-Neisseriales-Chromobacteriaceae-Chromobacterium-	4958966	NZ_JZJJ01000014.1	class_B2	360.9	+	54691	55423	54680	55453	ATGCACAGAATATTTAAATTTGCCGGCGCGATGCTGGGCCTGGCGCTGGCGGCCGGGGCCTGCGCGGCGCAGGGCAGCCTGAGCCTCAAGCACCTGAAGGGCGGCGTGTACGTGGTGGAAGACGACTATTACGCCAAGGAGAACTCGGCGGTATACGTCGGCGCGGAGCATGTGACCGTGGTGGGTGCCACCTGGACGCCGGACACCGCCCGCGAGCTGGCGCGGCAAATACGCGCGGTCACCGACAAGCCCATCGCCGAGGTGATCAATCCCAACTATCACACCGACCGGGCCGGCGGCAACGCGTACTGGAAGTCGATCGGCGCCCGCATCGTCGCCACCCGGCAGACGGTCGACGAGATGAGCCGCGGCTGGGACGACATCGTCGCTTTTACCCGG…	WP_235429325.1	subclass_B2_metallo-beta-lactamase	MHRIFKFAGAMLGLALAAGACAAQGSLSLKHLKGGVYVVEDDYYAKENSAVYVGAEHVTVVGATWTPDTARELARQIRAVTDKPIAEVINPNYHTDRAGGNAYWKSIGARIVATRQTVDEMSRGWDDIVAFTRQGFPDYPALPASMPDRVFPGDFELQGGKVKAFHLGAAHTRDGIFVYFPEEKVLYGNCILKQELGNLHYADLNEYPKTLDRLALSGLDIDTVIAGHLDALHGPELIDHYRQLLRRQASDAAAQAR	ORF_OK	TRUE_HIT	kcglagavvllasfwggsvraagislkqvsgpvyvvednyyvkensmvyfgakgvtvvgatwtpdtarelhklikrvsskpvlevintnyhtdraggnaywksigakvvatrqtrdlmksdwaeivaftrkglpeypdlplvlpnvvhdgdftlqegkvralyagpahtpdgifvyfpdeqvlygncilkeklgnlsfadvkaypktlerlkalklpiktvigghdsplhgpelidhyealikaa	IFKFAGAMLGLALAAGACAAQGSLSLKHLKGGVYVVEDDYYAKENSAVYVGAEHVTVVGATWTPDTARELARQIRAVTDKPIAEVINPNYHTDRAGGNAYWKSIGARIVATRQTVDEMSRGWDDIVAFTRQGFPDYPALPASMPDRVFPGDFELQGGKVKAFHLGAAHTRDGIFVYFPEEKVLYGNCILKQELGNLHYADLNEYPKTLDRLALSGLDIDTVIAGHLDALHGPELIDHYRQLLRRQ	7	251	96.063	0	0	0	257	Cluster_2	CLUSTER_NOT_IN_NCBI_AMR_REF_DB	Cluster_2	LIPO_Sec_SPII_	20-21	LIPO_Sec_SPII_	20-21	N_Y_H_T_D	C	H	.	.
B2_1144	GCF_001019645.1	1416915	644	Aeromonas_hydrophila_NJ-35	Bacteria-Pseudomonadota-Gammaproteobacteria-Aeromonadales-Aeromonadaceae-Aeromonas-	5279644	NZ_CP006870.1	class_B2	540.8	-	4360349	4361108	4360347	4361111	ATGATGAAAGGTTGGATGAAGTGCGGGTTGGCCGGGGCCGTGGTGCTGATGGCGAGTTTCTGGGGTGGCAGCGTGCGGGCGGCAGGGATCTCCCTCAAGCAGGTGAGCGGCCCGGTCTATGTGGTGGAGGACAACTACTACGTCAAAGAGAACTCCATGGTCTATTTCGGGGCCAAGGGGGTGACTGTGGTGGGGGCGACCTGGACGCCGGATACCGCCCGCGAGCTGCACAAGCTGATCAAACGGGTCAGCAGCAAGCCGGTGCTGGAGGTGATCAACACCAACTACCACACCGACCGGGCGGGCGGTAACGCCTACTGGAAGTCCATCGGGGCCAAGGTGGTGGCGACACGCCAGACCCGGGATCTGATGAAGAGCGACTGGGCCGAGATTGTCGCC…	WP_080644389.1	CphA_family_subclass_B2_metallo-beta-lactamase	MMKGWMKCGLAGAVVLMASFWGGSVRAAGISLKQVSGPVYVVEDNYYVKENSMVYFGAKGVTVVGATWTPDTARELHKLIKRVSSKPVLEVINTNYHTDRAGGNAYWKSIGAKVVATRQTRDLMKSDWAEIVAFTRKGLPEYPDLPLVLPNVVHDGDFTLQEGKVRAFYAGPAHTPDGIFVYFPDEQVLYGNCILKEKLGNLSFANVKAYPQTIERLKAMKLPIKTVIGGHDSPLHGPELIDHYEELIKAVPQS	ORF_OK	TRUE_HIT	mmkgwikcglagavvllasfwggsvraagislkqvsgpvyvvednyyvkensmvyfgakgvtvvgatwtpdtarelhklikrvsskpvlevintnyhtdraggnaywksigakvvatrqtrdlmksdwaeivaftrkglpeypdlplvlpnvvhdgdftlqegkvralyagpahtpdgifvyfpdeqvlygncilkeklgnlsfadvkaypktlerlkalklpiktvigghdsplhgpelidhyealikaaaks	MMKGWMKCGLAGAVVLMASFWGGSVRAAGISLKQVSGPVYVVEDNYYVKENSMVYFGAKGVTVVGATWTPDTARELHKLIKRVSSKPVLEVINTNYHTDRAGGNAYWKSIGAKVVATRQTRDLMKSDWAEIVAFTRKGLPEYPDLPLVLPNVVHDGDFTLQEGKVRAFYAGPAHTPDGIFVYFPDEQVLYGNCILKEKLGNLSFANVKAYPQTIERLKAMKLPIKTVIGGHDSPLHGPELIDHYEELIKAVPQS	1	254	99.6063	0	0	0	254	Cluster_4	ChpA_family_subclass_B2_metallo-beta-lactamase_ImiS_NG_050415.1_cds_WP_063865298.1_1	Cluster_4	SP_Sec_SPI_	27-28	SP_Sec_SPI_	27-28	N_Y_H_T_D	C	H	.	.
B2_1145	GCF_001043595.1	536	536	Chromobacterium_violaceum	Bacteria-Pseudomonadota-Betaproteobacteria-Neisseriales-Chromobacteriaceae-Chromobacterium-	4755712	NZ_LDUM01000033.1	class_B2	361.3	+	73333	74074	73334	74101	ATGCGCACAGTATTTGGATTCGCCGGCGCGCTGTTGGGCCTGGCGGCCGCCGCCTGCGCGGCGCAGGGCGGCCTGGCTCTCAAGCACCTGAAGGGCGGCGTGTACGTGGTGGAGGATGGCTATTACGCCAAGGAGAACTCGGTGGTCTATGTCGGCGCGGAGCACGTGACCGTGGTGGGCGCCACCTGGACGCCGGATACGGCCCGAGAGCTGGCGCGGCAGATACGCGCGGTCACCGACAAGCCGATCGCGGAAGTGGTCAATCCCAATTATCACCCCGACCGCGCCGGAGGGAACGCATACTGGAAGTCCATCGGCGCCCGCATCGTGTCGACCCGGCAGACCGCCGACGAGATGCGCCGAGGGTGGGACGAGGTCGTCGCCTTCACCCGCCGCGGC…	WP_048405214.1	CVI_family_subclass_B2_metallo-beta-lactamase	MRTVFGFAGALLGLAAAACAAQGGLALKHLKGGVYVVEDGYYAKENSVVYVGAEHVTVVGATWTPDTARELARQIRAVTDKPIAEVVNPNYHPDRAGGNAYWKSIGARIVSTRQTADEMRRGWDEVVAFTRRGFPDYPALPVSLPDRVHPGDFELQDGRIKAFHLGAAHTRDGIFVHFPQERVLYGNCILKQELGNLSYADLNEYPKTLERLKLSELDFDTVIAGHLDALHGPELIDHYQRLLKRQASDAAAERS	ORF_OK	TRUE_HIT	kgwikcglagavvllasfwggsvraagislkqvsgpvyvvednyyvkensmvyfgakgvtvvgatwtpdtarelhklikrvsskpvlevintnyhtdraggnaywksigakvvatrqtrdlmksdwaeivaftrkglpeypdlplvlpnvvhdgdftlqegkvralyagpahtpdgifvyfpdeqvlygncilkeklgnlsfadvkaypktlerlkalklpiktvigghdsplhgpelidhyealikaaa	KMRTVFGFAGALLGLAAAAC--AAQGGLALKHLKGGVYVVEDGYYAKENSVVYVGAEHVTVVGATWTPDTARELARQIRAVTDKPIAEVVNPNYHPDRAGGNAYWKSIGARIVSTRQTADEMRRGWDEVVAFTRRGFPDYPALPVSLPDRVHPGDFELQDGRIKAFHLGAAHTRDGIFVHFPQERVLYGNCILKQELGNLSYADLNEYPKTLERLKLSELDFDTVIAGHLDALHGPELIDHYQRLLKRQA	3	252	98.0315	0	2	0	255	Cluster_2	CLUSTER_NOT_IN_NCBI_AMR_REF_DB	Cluster_2	LIPO_Sec_SPII_	18-19	LIPO_Sec_SPII_	18-19	N_Y_H_P_D	C	H	.	.
B2_1146	GCF_001043735.1	536	536	Chromobacterium_violaceum	Bacteria-Pseudomonadota-Betaproteobacteria-Neisseriales-Chromobacteriaceae-Chromobacterium-	4763883	NZ_LDUU01000010.1	class_B2	361.3	-	57075	57816	57049	57816	ATGCGCACAGTATTTGGATTCGCCGGCGCGCTGTTGGGCCTGGCGGCCGCCGCCTGCGCGGCGCAGGGCGGCCTGGCTCTCAAGCACCTGAAGGGCGGCGTGTACGTGGTGGAGGATGGCTATTACGCCAAGGAGAACTCGGTGGTCTATGTCGGCGCGGAGCACGTGACCGTGGTGGGCGCCACCTGGACGCCGGATACGGCCCGAGAGCTGGCGCGGCAGATACGCGCGGTCACCGACAAGCCGATCGCGGAAGTGGTCAATCCCAATTATCACCCCGACCGCGCCGGAGGGAACGCATACTGGAAGTCCATCGGCGCCCGCATCGTGTCGACCCGGCAGACCGCCGACGAGATGCGCCGAGGGTGGGACGAGGTCGTCGCCTTCACCCGCCGCGGC…	WP_048405214.1	CVI_family_subclass_B2_metallo-beta-lactamase	MRTVFGFAGALLGLAAAACAAQGGLALKHLKGGVYVVEDGYYAKENSVVYVGAEHVTVVGATWTPDTARELARQIRAVTDKPIAEVVNPNYHPDRAGGNAYWKSIGARIVSTRQTADEMRRGWDEVVAFTRRGFPDYPALPVSLPDRVHPGDFELQDGRIKAFHLGAAHTRDGIFVHFPQERVLYGNCILKQELGNLSYADLNEYPKTLERLKLSELDFDTVIAGHLDALHGPELIDHYQRLLKRQASDAAAERS	ORF_OK	TRUE_HIT	kgwikcglagavvllasfwggsvraagislkqvsgpvyvvednyyvkensmvyfgakgvtvvgatwtpdtarelhklikrvsskpvlevintnyhtdraggnaywksigakvvatrqtrdlmksdwaeivaftrkglpeypdlplvlpnvvhdgdftlqegkvralyagpahtpdgifvyfpdeqvlygncilkeklgnlsfadvkaypktlerlkalklpiktvigghdsplhgpelidhyealikaaa	KMRTVFGFAGALLGLAAAAC--AAQGGLALKHLKGGVYVVEDGYYAKENSVVYVGAEHVTVVGATWTPDTARELARQIRAVTDKPIAEVVNPNYHPDRAGGNAYWKSIGARIVSTRQTADEMRRGWDEVVAFTRRGFPDYPALPVSLPDRVHPGDFELQDGRIKAFHLGAAHTRDGIFVHFPQERVLYGNCILKQELGNLSYADLNEYPKTLERLKLSELDFDTVIAGHLDALHGPELIDHYQRLLKRQA	3	252	98.0315	0	2	0	255	Cluster_2	CLUSTER_NOT_IN_NCBI_AMR_REF_DB	Cluster_2	LIPO_Sec_SPII_	18-19	LIPO_Sec_SPII_	18-19	N_Y_H_P_D	C	H	.	.
B2_1147	GCF_001043755.1	536	536	Chromobacterium_violaceum	Bacteria-Pseudomonadota-Betaproteobacteria-Neisseriales-Chromobacteriaceae-Chromobacterium-	4754524	NZ_LDUT01000018.1	class_B2	361.3	+	73332	74073	73333	74100	ATGCGCACAGTATTTGGATTCGCCGGCGCGCTGTTGGGCCTGGCGGCCGCCGCCTGCGCGGCGCAGGGCGGCCTGGCTCTCAAGCACCTGAAGGGCGGCGTGTACGTGGTGGAGGATGGCTATTACGCCAAGGAGAACTCGGTGGTCTATGTCGGCGCGGAGCACGTGACCGTGGTGGGCGCCACCTGGACGCCGGATACGGCCCGAGAGCTGGCGCGGCAGATACGCGCGGTCACCGACAAGCCGATCGCGGAAGTGGTCAATCCCAATTATCACCCCGACCGCGCCGGAGGGAACGCATACTGGAAGTCCATCGGCGCCCGCATCGTGTCGACCCGGCAGACCGCCGACGAGATGCGCCGAGGGTGGGACGAGGTCGTCGCCTTCACCCGCCGCGGC…	WP_048405214.1	CVI_family_subclass_B2_metallo-beta-lactamase	MRTVFGFAGALLGLAAAACAAQGGLALKHLKGGVYVVEDGYYAKENSVVYVGAEHVTVVGATWTPDTARELARQIRAVTDKPIAEVVNPNYHPDRAGGNAYWKSIGARIVSTRQTADEMRRGWDEVVAFTRRGFPDYPALPVSLPDRVHPGDFELQDGRIKAFHLGAAHTRDGIFVHFPQERVLYGNCILKQELGNLSYADLNEYPKTLERLKLSELDFDTVIAGHLDALHGPELIDHYQRLLKRQASDAAAERS	ORF_OK	TRUE_HIT	kgwikcglagavvllasfwggsvraagislkqvsgpvyvvednyyvkensmvyfgakgvtvvgatwtpdtarelhklikrvsskpvlevintnyhtdraggnaywksigakvvatrqtrdlmksdwaeivaftrkglpeypdlplvlpnvvhdgdftlqegkvralyagpahtpdgifvyfpdeqvlygncilkeklgnlsfadvkaypktlerlkalklpiktvigghdsplhgpelidhyealikaaa	KMRTVFGFAGALLGLAAAAC--AAQGGLALKHLKGGVYVVEDGYYAKENSVVYVGAEHVTVVGATWTPDTARELARQIRAVTDKPIAEVVNPNYHPDRAGGNAYWKSIGARIVSTRQTADEMRRGWDEVVAFTRRGFPDYPALPVSLPDRVHPGDFELQDGRIKAFHLGAAHTRDGIFVHFPQERVLYGNCILKQELGNLSYADLNEYPKTLERLKLSELDFDTVIAGHLDALHGPELIDHYQRLLKRQA	3	252	98.0315	0	2	0	255	Cluster_2	CLUSTER_NOT_IN_NCBI_AMR_REF_DB	Cluster_2	LIPO_Sec_SPII_	18-19	LIPO_Sec_SPII_	18-19	N_Y_H_P_D	C	H	.	.
B2_1148	GCF_001043815.1	536	536	Chromobacterium_violaceum	Bacteria-Pseudomonadota-Betaproteobacteria-Neisseriales-Chromobacteriaceae-Chromobacterium-	4752491	NZ_LDUX01000038.1	class_B2	361.3	-	57071	57812	57045	57812	ATGCGCACAGTATTTGGATTCGCCGGCGCGCTGTTGGGCCTGGCGGCCGCCGCCTGCGCGGCGCAGGGCGGCCTGGCTCTCAAGCACCTGAAGGGCGGCGTGTACGTGGTGGAGGATGGCTATTACGCCAAGGAGAACTCGGTGGTCTATGTCGGCGCGGAGCACGTGACCGTGGTGGGCGCCACCTGGACGCCGGATACGGCCCGAGAGCTGGCGCGGCAGATACGCGCGGTCACCGACAAGCCGATCGCGGAAGTGGTCAATCCCAATTATCACCCCGACCGCGCCGGAGGGAACGCATACTGGAAGTCCATCGGCGCCCGCATCGTGTCGACCCGGCAGACCGCCGACGAGATGCGCCGAGGGTGGGACGAGGTCGTCGCCTTCACCCGCCGCGGC…	WP_048405214.1	CVI_family_subclass_B2_metallo-beta-lactamase	MRTVFGFAGALLGLAAAACAAQGGLALKHLKGGVYVVEDGYYAKENSVVYVGAEHVTVVGATWTPDTARELARQIRAVTDKPIAEVVNPNYHPDRAGGNAYWKSIGARIVSTRQTADEMRRGWDEVVAFTRRGFPDYPALPVSLPDRVHPGDFELQDGRIKAFHLGAAHTRDGIFVHFPQERVLYGNCILKQELGNLSYADLNEYPKTLERLKLSELDFDTVIAGHLDALHGPELIDHYQRLLKRQASDAAAERS	ORF_OK	TRUE_HIT	kgwikcglagavvllasfwggsvraagislkqvsgpvyvvednyyvkensmvyfgakgvtvvgatwtpdtarelhklikrvsskpvlevintnyhtdraggnaywksigakvvatrqtrdlmksdwaeivaftrkglpeypdlplvlpnvvhdgdftlqegkvralyagpahtpdgifvyfpdeqvlygncilkeklgnlsfadvkaypktlerlkalklpiktvigghdsplhgpelidhyealikaaa	KMRTVFGFAGALLGLAAAAC--AAQGGLALKHLKGGVYVVEDGYYAKENSVVYVGAEHVTVVGATWTPDTARELARQIRAVTDKPIAEVVNPNYHPDRAGGNAYWKSIGARIVSTRQTADEMRRGWDEVVAFTRRGFPDYPALPVSLPDRVHPGDFELQDGRIKAFHLGAAHTRDGIFVHFPQERVLYGNCILKQELGNLSYADLNEYPKTLERLKLSELDFDTVIAGHLDALHGPELIDHYQRLLKRQA	3	252	98.0315	0	2	0	255	Cluster_2	CLUSTER_NOT_IN_NCBI_AMR_REF_DB	Cluster_2	LIPO_Sec_SPII_	18-19	LIPO_Sec_SPII_	18-19	N_Y_H_P_D	C	H	.	.
B2_1149	GCF_001050345.1	1674920	1674920	Pseudomonas_fildesensis	Bacteria-Pseudomonadota-Gammaproteobacteria-Pseudomonadales-Pseudomonadaceae-Pseudomonas-	6313355	NZ_LFMW01000021.1	class_B2	366.1	+	208032	208716	207967	208728	ATGAAGCTTATTAATATTCTGTCAGCCATCAGCCTGGCCTGCATTACCTCCCAGGTCTTCGCTAACCAGAGTGACTTGACCCTTACCAACTTCAAAGGCCCGCTCTACATCGTTGAAGACAAGGAGTATGTGCAGGAGAACTCAATGGTCTACATTGGCGAGCAACACATCACCGTCATCGGCGCAACCTGGACCCCAGCCACCGCTGAAAAGCTCGAGCAGGAAATCAGGAAAGTCAGCCCCCTGCCCATCAAGGAGGTGATCAACACCAACTACCACACCGACCGGGCGGGAGGTAACGCCTACTGGAGGGAGCTCGGCGCCAGTATTGTCTCCACACAGCTGACCTATGACCTGGAAAAAAGCCAGTGGCGCAGTATTGTCGACTTTACCCGGCAA…	WP_053221259.1	PFM_family_subclass_B2_metallo-beta-lactamase	MKLINILSAISLACITSQVFANQSDLTLTNFKGPLYIVEDKEYVQENSMVYIGEQHITVIGATWTPATAEKLEQEIRKVSPLPIKEVINTNYHTDRAGGNAYWRELGASIVSTQLTYDLEKSQWRSIVDFTRQGMEHYPVLEQSLPDQVYPGDFALQNGHVRALYLGASHTEDGIFVYFPEERVLYGNCILKEKLGNMTFANRSEYPKTLKKLQGLISSGELPVETIIAGHNSPIQSVELIDHYLNLLEHGEQ	ORF_OK	TRUE_HIT	raagislkqvsgpvyvvednyyvkensmvyfgakgvtvvgatwtpdtarelhklikrvsskpvlevintnyhtdraggnaywksigakvvatrqtrdlmksdwaeivaftrkglpeypdlplvlpnvvhdgdftlqegkvralyagpahtpdgifvyfpdeqvlygncilkeklgnlsfadvkaypktlerlkal....klpiktvigghdsplhgpelidhyealika	NQSDLTLTNFKGPLYIVEDKEYVQENSMVYIGEQHITVIGATWTPATAEKLEQEIRKVSPLPIKEVINTNYHTDRAGGNAYWRELGASIVSTQLTYDLEKSQWRSIVDFTRQGMEHYPVLEQSLPDQVYPGDFALQNGHVRALYLGASHTEDGIFVYFPEERVLYGNCILKEKLGNMTFANRSEYPKTLKKLQGLissgELPVETIIAGHNSPIQSVELIDHYLNLLEH	26	250	88.189	4	0	0	253	Cluster_1	CLUSTER_NOT_IN_NCBI_AMR_REF_DB	Cluster_1	SP_Sec_SPI_	21-22	SP_Sec_SPI_	21-22	N_Y_H_T_D	C	H	.	.
B2_115	GCF_008119745.1	654	654	Aeromonas_veronii	Bacteria-Pseudomonadota-Gammaproteobacteria-Aeromonadales-Aeromonadaceae-Aeromonas-	4741129	NZ_NQMC01000044.1	class_B2	548.1	+	34423	35182	34421	35185	ATGATGAAAGGTTGGATGAAGTGCACATTGGCCGGGGCTGTGGTGCTGATGGCGAGTTTCTGGGGTGGCAGCGTGCGGGCGGCGGGGATCGAACTCAAGCAGGTGAGCGGCCCTGTCTATGTGGTGGAGGATAACTACTACGTCAAAGAGAACTCCATGGTCTATTTCGGGGCCAAGGGGGTGACTGTGGTGGGGGCGACCTGGACGCCGGATACCGCCCGCGAGCTGCACAAGCTGATTAAAAGAGTCAGCAGCAAGCCGGTGCTGGAGGTGATCAACACCAACTACCACACCGACCGGGCGGGTGGTAACGCCTACTGGAAGTCCATCGGGGCCAAGGTGGTGGCGACGCGCCAGACCCGGGATCTGATGAAGAGCGACTGGGCCGAGATTGTCGCC…	WP_115544942.1	CphA_family_subclass_B2_metallo-beta-lactamase	MMKGWMKCTLAGAVVLMASFWGGSVRAAGIELKQVSGPVYVVEDNYYVKENSMVYFGAKGVTVVGATWTPDTARELHKLIKRVSSKPVLEVINTNYHTDRAGGNAYWKSIGAKVVATRQTRDLMKSDWAEIVAFTRKGLPEYPDLPLVLPNVVHDGDFTLQDGKVRAFYAGPAHTPDGIFVYFPDEQVLYGNCILKEKLGNLSFANVKAYPQTIERLKAMKLPIKTVIGGHDSPLHGPELIDHYEELIKAAPQS	ORF_OK	TRUE_HIT	mmkgwikcglagavvllasfwggsvraagislkqvsgpvyvvednyyvkensmvyfgakgvtvvgatwtpdtarelhklikrvsskpvlevintnyhtdraggnaywksigakvvatrqtrdlmksdwaeivaftrkglpeypdlplvlpnvvhdgdftlqegkvralyagpahtpdgifvyfpdeqvlygncilkeklgnlsfadvkaypktlerlkalklpiktvigghdsplhgpelidhyealikaaaks	MMKGWMKCTLAGAVVLMASFWGGSVRAAGIELKQVSGPVYVVEDNYYVKENSMVYFGAKGVTVVGATWTPDTARELHKLIKRVSSKPVLEVINTNYHTDRAGGNAYWKSIGAKVVATRQTRDLMKSDWAEIVAFTRKGLPEYPDLPLVLPNVVHDGDFTLQDGKVRAFYAGPAHTPDGIFVYFPDEQVLYGNCILKEKLGNLSFANVKAYPQTIERLKAMKLPIKTVIGGHDSPLHGPELIDHYEELIKAAPQS	1	254	99.6063	0	0	0	254	Cluster_4	ChpA_family_subclass_B2_metallo-beta-lactamase_ImiS_NG_050415.1_cds_WP_063865298.1_1	Cluster_4	SP_Sec_SPI_	27-28	SP_Sec_SPI_	27-28	N_Y_H_T_D	C	H	.	.
B2_1150	GCF_001055195.1	644	644	Aeromonas_hydrophila	Bacteria-Pseudomonadota-Gammaproteobacteria-Aeromonadales-Aeromonadaceae-Aeromonas-	4668456	NZ_JVES01000065.1	class_B2	548.7	-	10167	10926	10165	10929	ATGATGAAAGGTTGGATGAAATGCGGGTTGGCCGGGGCCGTGGTGCTGATGGCGAGTTTTTGGGGCGGCAGCGTGCGGGCGGCGGGGATCTCCCTCAAGCAGGTGAGCGGCCCTGTCTATGTGGTGGAGGACAACTACTACGTCAAAGAGAACTCCATGGTCTATTTCGGGGCCAAGGGGGTGACTGTGGTGGGGGCGACCTGGACGCCGGATACCGCCCGCGAGTTGCACAAGCTGATCAAACGGGTCAGCAGCAAGCCGGTACTGGAGGTGATCAACACCAACTACCACACCGATCGGGCGGGCGGTAACGCCTACTGGAAGTCCATCGGGGCCAAGGTGGTGGCGACGCGCCAGACCCGGGATCTGATGAAGAGCGACTGGGCCGAGATTGTCGCC…	WP_080972937.1	CphA_family_subclass_B2_metallo-beta-lactamase	MMKGWMKCGLAGAVVLMASFWGGSVRAAGISLKQVSGPVYVVEDNYYVKENSMVYFGAKGVTVVGATWTPDTARELHKLIKRVSSKPVLEVINTNYHTDRAGGNAYWKSIGAKVVATRQTRDLMKSDWAEIVAFTRKGLPEYPDLPLVLPNVVHDGDFKLQDGKVRAFYAGPAHTPDGIFVYFPDEQVLYGNCILKEKLGNLSFANVKEYPQTIERLKAMKLPIKTVIGGHDSPLHGPELIDHYEALIKAVPQS	ORF_OK	TRUE_HIT	mmkgwikcglagavvllasfwggsvraagislkqvsgpvyvvednyyvkensmvyfgakgvtvvgatwtpdtarelhklikrvsskpvlevintnyhtdraggnaywksigakvvatrqtrdlmksdwaeivaftrkglpeypdlplvlpnvvhdgdftlqegkvralyagpahtpdgifvyfpdeqvlygncilkeklgnlsfadvkaypktlerlkalklpiktvigghdsplhgpelidhyealikaaaks	MMKGWMKCGLAGAVVLMASFWGGSVRAAGISLKQVSGPVYVVEDNYYVKENSMVYFGAKGVTVVGATWTPDTARELHKLIKRVSSKPVLEVINTNYHTDRAGGNAYWKSIGAKVVATRQTRDLMKSDWAEIVAFTRKGLPEYPDLPLVLPNVVHDGDFKLQDGKVRAFYAGPAHTPDGIFVYFPDEQVLYGNCILKEKLGNLSFANVKEYPQTIERLKAMKLPIKTVIGGHDSPLHGPELIDHYEALIKAVPQS	1	254	99.6063	0	0	0	254	Cluster_4	ChpA_family_subclass_B2_metallo-beta-lactamase_ImiS_NG_050415.1_cds_WP_063865298.1_1	Cluster_4	SP_Sec_SPI_	27-28	SP_Sec_SPI_	27-28	N_Y_H_T_D	C	H	.	.
B2_1151	GCF_001055245.1	644	644	Aeromonas_hydrophila	Bacteria-Pseudomonadota-Gammaproteobacteria-Aeromonadales-Aeromonadaceae-Aeromonas-	4671513	NZ_JVDL01000006.1	class_B2	548.7	+	384	1143	385	1146	ATGAAAGGTTGGATGAAATGCGGGTTGGCCGGGGCCGTGGTGCTGATGGCGAGTTTTTGGGGCGGCAGCGTGCGGGCGGCGGGGATCTCCCTCAAGCAGGTGAGCGGCCCTGTCTATGTGGTGGAGGACAACTACTACGTCAAAGAGAACTCCATGGTCTATTTCGGGGCCAAGGGGGTGACTGTGGTGGGGGCGACCTGGACGCCGGATACCGCCCGCGAGTTGCACAAGCTGATCAAACGGGTCAGCAGCAAGCCGGTACTGGAGGTGATCAACACCAACTACCACACCGATCGGGCGGGCGGTAACGCCTACTGGAAGTCCATCGGGGCCAAGGTGGTGGCGACGCGCCAGACCCGGGATCTGATGAAGAGCGACTGGGCCGAGATTGTCGCCTTT…	WP_049047121.1	CphA_family_subclass_B2_metallo-beta-lactamase	MKGWMKCGLAGAVVLMASFWGGSVRAAGISLKQVSGPVYVVEDNYYVKENSMVYFGAKGVTVVGATWTPDTARELHKLIKRVSSKPVLEVINTNYHTDRAGGNAYWKSIGAKVVATRQTRDLMKSDWAEIVAFTRKGLPEYPDLPLVLPNVVHDGDFKLQDGKVRAFYAGPAHTPDGIFVYFPDEQVLYGNCILKEKLGNLSFANVKEYPQTIERLKAMKLPIKTVIGGHDSPLHGPELIDHYEALIKAVPQS	ORF_OK	TRUE_HIT	mmkgwikcglagavvllasfwggsvraagislkqvsgpvyvvednyyvkensmvyfgakgvtvvgatwtpdtarelhklikrvsskpvlevintnyhtdraggnaywksigakvvatrqtrdlmksdwaeivaftrkglpeypdlplvlpnvvhdgdftlqegkvralyagpahtpdgifvyfpdeqvlygncilkeklgnlsfadvkaypktlerlkalklpiktvigghdsplhgpelidhyealikaaaks	MMKGWMKCGLAGAVVLMASFWGGSVRAAGISLKQVSGPVYVVEDNYYVKENSMVYFGAKGVTVVGATWTPDTARELHKLIKRVSSKPVLEVINTNYHTDRAGGNAYWKSIGAKVVATRQTRDLMKSDWAEIVAFTRKGLPEYPDLPLVLPNVVHDGDFKLQDGKVRAFYAGPAHTPDGIFVYFPDEQVLYGNCILKEKLGNLSFANVKEYPQTIERLKAMKLPIKTVIGGHDSPLHGPELIDHYEALIKAVPQS	1	254	99.6063	0	0	0	253	Cluster_4	ChpA_family_subclass_B2_metallo-beta-lactamase_ImiS_NG_050415.1_cds_WP_063865298.1_1	Cluster_4	SP_Sec_SPI_	26-27	SP_Sec_SPI_	26-27	N_Y_H_T_D	C	H	.	.
B2_1152	GCF_001056955.1	644	644	Aeromonas_hydrophila	Bacteria-Pseudomonadota-Gammaproteobacteria-Aeromonadales-Aeromonadaceae-Aeromonas-	4700156	NZ_JVFM01000029.1	class_B2	548.7	+	690	1449	691	1452	ATGAAAGGTTGGATGAAATGCGGGTTGGCCGGGGCCGTGGTGCTGATGGCGAGTTTTTGGGGCGGCAGCGTGCGGGCGGCGGGGATCTCCCTCAAGCAGGTGAGCGGCCCTGTCTATGTGGTGGAGGACAACTACTACGTCAAAGAGAACTCCATGGTCTATTTCGGGGCCAAGGGGGTGACTGTGGTGGGGGCGACCTGGACGCCGGATACCGCCCGCGAGTTGCACAAGCTGATCAAACGGGTCAGCAGCAAGCCGGTACTGGAGGTGATCAACACCAACTACCACACCGATCGGGCGGGCGGTAACGCCTACTGGAAGTCCATCGGGGCCAAGGTGGTGGCGACGCGCCAGACCCGGGATCTGATGAAGAGCGACTGGGCCGAGATTGTCGCCTTT…	WP_049047121.1	CphA_family_subclass_B2_metallo-beta-lactamase	MKGWMKCGLAGAVVLMASFWGGSVRAAGISLKQVSGPVYVVEDNYYVKENSMVYFGAKGVTVVGATWTPDTARELHKLIKRVSSKPVLEVINTNYHTDRAGGNAYWKSIGAKVVATRQTRDLMKSDWAEIVAFTRKGLPEYPDLPLVLPNVVHDGDFKLQDGKVRAFYAGPAHTPDGIFVYFPDEQVLYGNCILKEKLGNLSFANVKEYPQTIERLKAMKLPIKTVIGGHDSPLHGPELIDHYEALIKAVPQS	ORF_OK	TRUE_HIT	mmkgwikcglagavvllasfwggsvraagislkqvsgpvyvvednyyvkensmvyfgakgvtvvgatwtpdtarelhklikrvsskpvlevintnyhtdraggnaywksigakvvatrqtrdlmksdwaeivaftrkglpeypdlplvlpnvvhdgdftlqegkvralyagpahtpdgifvyfpdeqvlygncilkeklgnlsfadvkaypktlerlkalklpiktvigghdsplhgpelidhyealikaaaks	MMKGWMKCGLAGAVVLMASFWGGSVRAAGISLKQVSGPVYVVEDNYYVKENSMVYFGAKGVTVVGATWTPDTARELHKLIKRVSSKPVLEVINTNYHTDRAGGNAYWKSIGAKVVATRQTRDLMKSDWAEIVAFTRKGLPEYPDLPLVLPNVVHDGDFKLQDGKVRAFYAGPAHTPDGIFVYFPDEQVLYGNCILKEKLGNLSFANVKEYPQTIERLKAMKLPIKTVIGGHDSPLHGPELIDHYEALIKAVPQS	1	254	99.6063	0	0	0	253	Cluster_4	ChpA_family_subclass_B2_metallo-beta-lactamase_ImiS_NG_050415.1_cds_WP_063865298.1_1	Cluster_4	SP_Sec_SPI_	26-27	SP_Sec_SPI_	26-27	N_Y_H_T_D	C	H	.	.
B2_1153	GCF_001057115.1	644	644	Aeromonas_hydrophila	Bacteria-Pseudomonadota-Gammaproteobacteria-Aeromonadales-Aeromonadaceae-Aeromonas-	4683451	NZ_JVDW01000025.1	class_B2	548.7	+	690	1449	691	1452	ATGAAAGGTTGGATGAAATGCGGGTTGGCCGGGGCCGTGGTGCTGATGGCGAGTTTTTGGGGCGGCAGCGTGCGGGCGGCGGGGATCTCCCTCAAGCAGGTGAGCGGCCCTGTCTATGTGGTGGAGGACAACTACTACGTCAAAGAGAACTCCATGGTCTATTTCGGGGCCAAGGGGGTGACTGTGGTGGGGGCGACCTGGACGCCGGATACCGCCCGCGAGTTGCACAAGCTGATCAAACGGGTCAGCAGCAAGCCGGTACTGGAGGTGATCAACACCAACTACCACACCGATCGGGCGGGCGGTAACGCCTACTGGAAGTCCATCGGGGCCAAGGTGGTGGCGACGCGCCAGACCCGGGATCTGATGAAGAGCGACTGGGCCGAGATTGTCGCCTTT…	WP_049047121.1	CphA_family_subclass_B2_metallo-beta-lactamase	MKGWMKCGLAGAVVLMASFWGGSVRAAGISLKQVSGPVYVVEDNYYVKENSMVYFGAKGVTVVGATWTPDTARELHKLIKRVSSKPVLEVINTNYHTDRAGGNAYWKSIGAKVVATRQTRDLMKSDWAEIVAFTRKGLPEYPDLPLVLPNVVHDGDFKLQDGKVRAFYAGPAHTPDGIFVYFPDEQVLYGNCILKEKLGNLSFANVKEYPQTIERLKAMKLPIKTVIGGHDSPLHGPELIDHYEALIKAVPQS	ORF_OK	TRUE_HIT	mmkgwikcglagavvllasfwggsvraagislkqvsgpvyvvednyyvkensmvyfgakgvtvvgatwtpdtarelhklikrvsskpvlevintnyhtdraggnaywksigakvvatrqtrdlmksdwaeivaftrkglpeypdlplvlpnvvhdgdftlqegkvralyagpahtpdgifvyfpdeqvlygncilkeklgnlsfadvkaypktlerlkalklpiktvigghdsplhgpelidhyealikaaaks	MMKGWMKCGLAGAVVLMASFWGGSVRAAGISLKQVSGPVYVVEDNYYVKENSMVYFGAKGVTVVGATWTPDTARELHKLIKRVSSKPVLEVINTNYHTDRAGGNAYWKSIGAKVVATRQTRDLMKSDWAEIVAFTRKGLPEYPDLPLVLPNVVHDGDFKLQDGKVRAFYAGPAHTPDGIFVYFPDEQVLYGNCILKEKLGNLSFANVKEYPQTIERLKAMKLPIKTVIGGHDSPLHGPELIDHYEALIKAVPQS	1	254	99.6063	0	0	0	253	Cluster_4	ChpA_family_subclass_B2_metallo-beta-lactamase_ImiS_NG_050415.1_cds_WP_063865298.1_1	Cluster_4	SP_Sec_SPI_	26-27	SP_Sec_SPI_	26-27	N_Y_H_T_D	C	H	.	.
B2_1154	GCF_001057275.1	644	644	Aeromonas_hydrophila	Bacteria-Pseudomonadota-Gammaproteobacteria-Aeromonadales-Aeromonadaceae-Aeromonas-	4683746	NZ_JVCD01000034.1	class_B2	548.7	+	690	1449	691	1452	ATGAAAGGTTGGATGAAATGCGGGTTGGCCGGGGCCGTGGTGCTGATGGCGAGTTTTTGGGGCGGCAGCGTGCGGGCGGCGGGGATCTCCCTCAAGCAGGTGAGCGGCCCTGTCTATGTGGTGGAGGACAACTACTACGTCAAAGAGAACTCCATGGTCTATTTCGGGGCCAAGGGGGTGACTGTGGTGGGGGCGACCTGGACGCCGGATACCGCCCGCGAGTTGCACAAGCTGATCAAACGGGTCAGCAGCAAGCCGGTACTGGAGGTGATCAACACCAACTACCACACCGATCGGGCGGGCGGTAACGCCTACTGGAAGTCCATCGGGGCCAAGGTGGTGGCGACGCGCCAGACCCGGGATCTGATGAAGAGCGACTGGGCCGAGATTGTCGCCTTT…	WP_049047121.1	CphA_family_subclass_B2_metallo-beta-lactamase	MKGWMKCGLAGAVVLMASFWGGSVRAAGISLKQVSGPVYVVEDNYYVKENSMVYFGAKGVTVVGATWTPDTARELHKLIKRVSSKPVLEVINTNYHTDRAGGNAYWKSIGAKVVATRQTRDLMKSDWAEIVAFTRKGLPEYPDLPLVLPNVVHDGDFKLQDGKVRAFYAGPAHTPDGIFVYFPDEQVLYGNCILKEKLGNLSFANVKEYPQTIERLKAMKLPIKTVIGGHDSPLHGPELIDHYEALIKAVPQS	ORF_OK	TRUE_HIT	mmkgwikcglagavvllasfwggsvraagislkqvsgpvyvvednyyvkensmvyfgakgvtvvgatwtpdtarelhklikrvsskpvlevintnyhtdraggnaywksigakvvatrqtrdlmksdwaeivaftrkglpeypdlplvlpnvvhdgdftlqegkvralyagpahtpdgifvyfpdeqvlygncilkeklgnlsfadvkaypktlerlkalklpiktvigghdsplhgpelidhyealikaaaks	MMKGWMKCGLAGAVVLMASFWGGSVRAAGISLKQVSGPVYVVEDNYYVKENSMVYFGAKGVTVVGATWTPDTARELHKLIKRVSSKPVLEVINTNYHTDRAGGNAYWKSIGAKVVATRQTRDLMKSDWAEIVAFTRKGLPEYPDLPLVLPNVVHDGDFKLQDGKVRAFYAGPAHTPDGIFVYFPDEQVLYGNCILKEKLGNLSFANVKEYPQTIERLKAMKLPIKTVIGGHDSPLHGPELIDHYEALIKAVPQS	1	254	99.6063	0	0	0	253	Cluster_4	ChpA_family_subclass_B2_metallo-beta-lactamase_ImiS_NG_050415.1_cds_WP_063865298.1_1	Cluster_4	SP_Sec_SPI_	26-27	SP_Sec_SPI_	26-27	N_Y_H_T_D	C	H	.	.
B2_1155	GCF_001108385.1	33060	33060	Yersinia_mollaretii	Bacteria-Pseudomonadota-Gammaproteobacteria-Enterobacterales-Yersiniaceae-Yersinia-	4651958	NZ_CPYJ01000001.1	class_B2	355.7	-	32971	33673	32966	33706	ATGTTAAAAATAATATTACAATTTTTTGTTTTACTCACTGTAACTCAAAGTGCTTATGCATCTAAAATAGCATTAATAAAATTAAGTGATAATCTTTATGTTGTCGAGGACGACTATTATTACAGAGAAAACTCCATGGTTTACATTGGTAAAGACTATATTACCGTTATTGGTGCTACCTGGACACCGGATACAGCTAAAGAATTAGATTCGCAAATCAAAAAAGTAAGTAATAAACCCATCACTGAAGTTATCAATACCAATTATCATACGGACAGGGCCGGTGGTAATTTATATTGGAAAAGTATTGGTGCTGAATTAATTTCTACAAAAATGACGTATAATCTAATGGAAAAACATTGGCAAGATATTCTTGAGACTACCCGCAAGGGGTACCAT…	WP_049645673.1	YEM_family_subclass_B2_metallo-beta-lactamase	MLKIILQFFVLLTVTQSAYASKIALIKLSDNLYVVEDDYYYRENSMVYIGKDYITVIGATWTPDTAKELDSQIKKVSNKPITEVINTNYHTDRAGGNLYWKSIGAELISTKMTYNLMEKHWQDILETTRKGYHGFPDIPLVLPTKTFDNNFELQNGEIKAIYTGESHTPDGIFVYFPKEKTLYGNCIIKEKLGNLASANIKEYPKTLQKLKNLNLDIKTVVGGHDSPIHGSELIDSYKKLIEAANK	ORF_OK	TRUE_HIT	llasfwggsvraagislkqvsgpvyvvednyyvkensmvyfgakgvtvvgatwtpdtarelhklikrvsskpvlevintnyhtdraggnaywksigakvvatrqtrdlmksdwaeivaftrkglpeypdlplvlpnvvhdgdftlqegkvralyagpahtpdgifvyfpdeqvlygncilkeklgnlsfadvkaypktlerlkalklpiktvigghdsplhgpelidhyealikaaa	LLT--VTQSAYASKIALIKLSDNLYVVEDDYYYRENSMVYIGKDYITVIGATWTPDTAKELDSQIKKVSNKPITEVINTNYHTDRAGGNLYWKSIGAELISTKMTYNLMEKHWQDILETTRKGYHGFPDIPLVLPTKTFDNNFELQNGEIKAIYTGESHTPDGIFVYFPKEKTLYGNCIIKEKLGNLASANIKEYPKTLQKLKNLNLDIKTVVGGHDSPIHGSELIDSYKKLIEAAN	16	252	92.9134	0	2	0	246	Cluster_11	CLUSTER_NOT_IN_NCBI_AMR_REF_DB	Cluster_10	SP_Sec_SPI_	20-21	SP_Sec_SPI_	20-21	N_Y_H_T_D	C	S	.	.
B2_1156	GCF_001127065.1	33060	33060	Yersinia_mollaretii	Bacteria-Pseudomonadota-Gammaproteobacteria-Enterobacterales-Yersiniaceae-Yersinia-	4663249	NZ_CQBM01000011.1	class_B2	358.5	-	34423	35125	34418	35158	ATGTTAAAAATAATATTACAATTTTTTGTTTTACTCACTGTAACTCAAAGTGCTTATGCATCTAAAATAGCATTAATAAAATTAAGTGATAATCTTTATGTTGTCGAGGACGACTATTATTACAGAGAAAACTCCATGGTTTACATTGGTAAAGACTATATTACCGTTATTGGTGCTACCTGGACACCGGATACAGCTAAAGAATTAGATTCGCAAATCAAAAAAGTAAGTAATAAACCCATCACTGAAGTTATCAATACCAATTATCATACGGACAGGGCCGGTGGTAATTTATATTGGAAAAGTATTGGTGCTGAATTAATTTCTACAAAAATGACGTATAATCTAATGGAAAAACATTGGCAAGATATTCTTGAGACTACCCGCAAGGGGTACCAT…	WP_049645673.1	YEM_family_subclass_B2_metallo-beta-lactamase	MLKIILQFFVLLTVTQSAYASKIALIKLSDNLYVVEDDYYYRENSMVYIGKDYITVIGATWTPDTAKELDSQIKKVSNKPITEVINTNYHTDRAGGNLYWKSIGAELISTKMTYNLMEKHWQDILETTRKGYHGFPDIPLVLPTKTFDNNFELQNGEIKAIYTGESHTPDGIFVYFPKEKTLYGNCIIKEKLGNLASANIKEYPKTLQKLKNLNLDIKTVVGGHDSPIHGSELIDSYKKLIEAANK	ORF_OK	TRUE_HIT	llasfwggsvraagislkqvsgpvyvvednyyvkensmvyfgakgvtvvgatwtpdtarelhklikrvsskpvlevintnyhtdraggnaywksigakvvatrqtrdlmksdwaeivaftrkglpeypdlplvlpnvvhdgdftlqegkvralyagpahtpdgifvyfpdeqvlygncilkeklgnlsfadvkaypktlerlkalklpiktvigghdsplhgpelidhyealikaaa	LLT--VTQSAYASKIALIKLSDNLYVVEDDYYYRENSMVYIGKDYITVIGATWTPDTAKELDSQIKKVSNKPITEVINTNYHTDRAGGNLYWKSIGAELISTKMTYNLMEKHWQDILETTRKGYHGFPDIPLVLPTKTFDNNFELQNGEIKAIYTGESHTPDGIFVYFPKEKTLYGNCIIKEKLGNLASANIKEYPKTLQKLKNLNLDIKTVVGGHDSPIHGSELIDSYKKLIEAAN	16	252	92.9134	0	2	0	246	Cluster_11	CLUSTER_NOT_IN_NCBI_AMR_REF_DB	Cluster_10	SP_Sec_SPI_	20-21	SP_Sec_SPI_	20-21	N_Y_H_T_D	C	S	.	.
B2_1157	GCF_001218645.1	33060	33060	Yersinia_mollaretii	Bacteria-Pseudomonadota-Gammaproteobacteria-Enterobacterales-Yersiniaceae-Yersinia-	4659441	NZ_CTKJ01000011.1	class_B2	358.5	+	86308	87010	86276	87016	ATGTTAAAAATAATATTACAATTTTTTGTTTTACTCACTGTAACTCAAAGTGCTTATGCATCTAAAATAGCATTAATAAAATTAAGTGATAATCTTTATGTTGTCGAGGACGACTATTATTACAGAGAAAACTCCATGGTTTACATTGGTAAAGACTATATTACCGTTATTGGTGCTACCTGGACACCGGATACAGCTAAAGAATTAGATTCGCAAATCAAAAAAGTAAGTAATAAACCCATCACTGAAGTTATCAATACCAATTATCATACGGACAGGGCCGGTGGTAATTTATATTGGAAAAGTATTGGTGCTGAATTAATTTCTACAAAAATGACGTATAATCTAATGGAAAAACATTGGCAAGATATTCTTGAGACTACCCGCAAGGGGTACCAT…	WP_049645673.1	YEM_family_subclass_B2_metallo-beta-lactamase	MLKIILQFFVLLTVTQSAYASKIALIKLSDNLYVVEDDYYYRENSMVYIGKDYITVIGATWTPDTAKELDSQIKKVSNKPITEVINTNYHTDRAGGNLYWKSIGAELISTKMTYNLMEKHWQDILETTRKGYHGFPDIPLVLPTKTFDNNFELQNGEIKAIYTGESHTPDGIFVYFPKEKTLYGNCIIKEKLGNLASANIKEYPKTLQKLKNLNLDIKTVVGGHDSPIHGSELIDSYKKLIEAANK	ORF_OK	TRUE_HIT	llasfwggsvraagislkqvsgpvyvvednyyvkensmvyfgakgvtvvgatwtpdtarelhklikrvsskpvlevintnyhtdraggnaywksigakvvatrqtrdlmksdwaeivaftrkglpeypdlplvlpnvvhdgdftlqegkvralyagpahtpdgifvyfpdeqvlygncilkeklgnlsfadvkaypktlerlkalklpiktvigghdsplhgpelidhyealikaaa	LLT--VTQSAYASKIALIKLSDNLYVVEDDYYYRENSMVYIGKDYITVIGATWTPDTAKELDSQIKKVSNKPITEVINTNYHTDRAGGNLYWKSIGAELISTKMTYNLMEKHWQDILETTRKGYHGFPDIPLVLPTKTFDNNFELQNGEIKAIYTGESHTPDGIFVYFPKEKTLYGNCIIKEKLGNLASANIKEYPKTLQKLKNLNLDIKTVVGGHDSPIHGSELIDSYKKLIEAAN	16	252	92.9134	0	2	0	246	Cluster_11	CLUSTER_NOT_IN_NCBI_AMR_REF_DB	Cluster_10	SP_Sec_SPI_	20-21	SP_Sec_SPI_	20-21	N_Y_H_T_D	C	S	.	.
B2_1158	GCF_001220765.1	33060	33060	Yersinia_mollaretii	Bacteria-Pseudomonadota-Gammaproteobacteria-Enterobacterales-Yersiniaceae-Yersinia-	4542619	NZ_CTIO01000005.1	class_B2	354.1	-	150981	151674	150976	151716	ATGTTAAAAACAATATTACAATTTTTTGTTTTATTCACTGTAACTCAAGGTGCTTATGCATCTAAAATAGCATTGGTAAAATTAAGTGATAATCTTTATGTTGTCGAGGACGACTATTATTACAGAGAAAACTCCATGGTTTACATTGGTAAAGACTATATTACCGTTATTGGTGCCACCTGGACACCGGATACAGCTAAAGAATTAGATGCGCAAATCAAAAAAATAAGTAAAAAACCCATCGCTGAAGTTATCAATACCAATTATCATACGGACAGGGCCGGTGGTAATTTATATTGGAAAAGTATTGGTGCTGAATTGATTTCTACCAAAATGACGTATAATTTAATGGAAAAACATTGGCAAGATATTCTTGAGACTACCCGTAAAGGGTACGAT…	WP_004874166.1	subclass_B2_metallo-beta-lactamase_YEM-1	MLKTILQFFVLFTVTQGAYASKIALVKLSDNLYVVEDDYYYRENSMVYIGKDYITVIGATWTPDTAKELDAQIKKISKKPIAEVINTNYHTDRAGGNLYWKSIGAELISTKMTYNLMEKHWQDILETTRKGYDGFPDIPLVLPTKTFDNNFELQNGEIKAIYTGESHTPDGIFVYFPKEKTLYGNCIIKEKLGNLASANIKEYPKTLQKLKNLNLDIKTVVGGHDSPIHGSELIDSYKKLIEAANK	ORF_OK	TRUE_HIT	wggsvraagislkqvsgpvyvvednyyvkensmvyfgakgvtvvgatwtpdtarelhklikrvsskpvlevintnyhtdraggnaywksigakvvatrqtrdlmksdwaeivaftrkglpeypdlplvlpnvvhdgdftlqegkvralyagpahtpdgifvyfpdeqvlygncilkeklgnlsfadvkaypktlerlkalklpiktvigghdsplhgpelidhyealikaaa	VTQGAYASKIALVKLSDNLYVVEDDYYYRENSMVYIGKDYITVIGATWTPDTAKELDAQIKKISKKPIAEVINTNYHTDRAGGNLYWKSIGAELISTKMTYNLMEKHWQDILETTRKGYDGFPDIPLVLPTKTFDNNFELQNGEIKAIYTGESHTPDGIFVYFPKEKTLYGNCIIKEKLGNLASANIKEYPKTLQKLKNLNLDIKTVVGGHDSPIHGSELIDSYKKLIEAAN	21	252	90.9449	0	0	0	246	Cluster_11	CLUSTER_NOT_IN_NCBI_AMR_REF_DB	Cluster_10	SP_Sec_SPI_	20-21	SP_Sec_SPI_	20-21	N_Y_H_T_D	C	S	.	.
B2_1159	GCF_001222925.1	33060	33060	Yersinia_mollaretii	Bacteria-Pseudomonadota-Gammaproteobacteria-Enterobacterales-Yersiniaceae-Yersinia-	4536510	NZ_CTEP01000087.1	class_B2	363.8	+	224	914	183	914	ATGTTAAAAACAATATTACAATTTTTTGTTTTATTCACTGTAACTCAAGGTGCTTATGCATCTAAAATAGCATTGGTAAAATTAAGTGATAATCTTTATGTTGTCGAGGACGACTATTATTACAGAGAAAACTCCATGGTTTACATTGGTAAAGACTATATTACCGTTATTGGTGCCACCTGGACACCGGATACAGCTAAAGAATTAGATGCGCAAATCAAAAAAATAAGTAAAAAACCCATCGCTGAAGTTATCAATACCAATTATCATACGGACAGGGCCGGTGGTAATTTATATTGGAAAAGTATTGGTGCTGAATTGATTTCTACCAAAATGACGTATAATTTAATGGAAAAACATTGGCAAGATATTCTTGAGACTACCCGTAAAGGGTACGAT…	WP_050540509.1	YEM_family_subclass_B2_metallo-beta-lactamase_partial	MLKTILQFFVLFTVTQGAYASKIALVKLSDNLYVVEDDYYYRENSMVYIGKDYITVIGATWTPDTAKELDAQIKKISKKPIAEVINTNYHTDRAGGNLYWKSIGAELISTKMTYNLMEKHWQDILETTRKGYDGFPDIPLVLPTKTFDNNFELQNGEIKAIYTGESHTPDGIFVYFPKEKTLYGNCIIKEKLGNLASANIKEYPKTLQKLKNLNLDIKTVVGGHDSPIHGSELIDSYKKLIEAA	ORF_OK	TRUE_HIT	wggsvraagislkqvsgpvyvvednyyvkensmvyfgakgvtvvgatwtpdtarelhklikrvsskpvlevintnyhtdraggnaywksigakvvatrqtrdlmksdwaeivaftrkglpeypdlplvlpnvvhdgdftlqegkvralyagpahtpdgifvyfpdeqvlygncilkeklgnlsfadvkaypktlerlkalklpiktvigghdsplhgpelidhyealikaa	VTQGAYASKIALVKLSDNLYVVEDDYYYRENSMVYIGKDYITVIGATWTPDTAKELDAQIKKISKKPIAEVINTNYHTDRAGGNLYWKSIGAELISTKMTYNLMEKHWQDILETTRKGYDGFPDIPLVLPTKTFDNNFELQNGEIKAIYTGESHTPDGIFVYFPKEKTLYGNCIIKEKLGNLASANIKEYPKTLQKLKNLNLDIKTVVGGHDSPIHGSELIDSYKKLIEAA	21	251	90.5512	0	0	0	244	Cluster_10	CLUSTER_NOT_IN_NCBI_AMR_REF_DB	Cluster_10	SP_Sec_SPI_	20-21	SP_Sec_SPI_	20-21	N_Y_H_T_D	C	S	.	.
B2_116	GCF_008119755.1	654	654	Aeromonas_veronii	Bacteria-Pseudomonadota-Gammaproteobacteria-Aeromonadales-Aeromonadaceae-Aeromonas-	4672256	NZ_NQMB01000039.1	class_B2	548.1	+	34463	35222	34461	35225	ATGATGAAAGGTTGGATGAAGTGCACATTGGCCGGGGCTGTGGTGCTGATGGCGAGTTTCTGGGGTGGCAGCGTGCGGGCGGCGGGGATCGAACTCAAGCAGGTGAGCGGCCCTGTCTATGTGGTGGAGGATAACTACTACGTCAAAGAGAACTCCATGGTCTATTTCGGGGCCAAGGGGGTGACTGTGGTGGGGGCGACCTGGACGCCGGATACCGCCCGCGAGCTGCACAAGCTGATTAAAAGAGTCAGCAGCAAGCCGGTGCTGGAGGTGATCAACACCAACTACCACACCGACCGGGCGGGTGGTAACGCCTACTGGAAGTCCATCGGGGCCAAGGTGGTGGCGACGCGCCAGACCCGGGATCTGATGAAGAGCGACTGGGCCGAGATTGTCGCC…	WP_115544942.1	CphA_family_subclass_B2_metallo-beta-lactamase	MMKGWMKCTLAGAVVLMASFWGGSVRAAGIELKQVSGPVYVVEDNYYVKENSMVYFGAKGVTVVGATWTPDTARELHKLIKRVSSKPVLEVINTNYHTDRAGGNAYWKSIGAKVVATRQTRDLMKSDWAEIVAFTRKGLPEYPDLPLVLPNVVHDGDFTLQDGKVRAFYAGPAHTPDGIFVYFPDEQVLYGNCILKEKLGNLSFANVKAYPQTIERLKAMKLPIKTVIGGHDSPLHGPELIDHYEELIKAAPQS	ORF_OK	TRUE_HIT	mmkgwikcglagavvllasfwggsvraagislkqvsgpvyvvednyyvkensmvyfgakgvtvvgatwtpdtarelhklikrvsskpvlevintnyhtdraggnaywksigakvvatrqtrdlmksdwaeivaftrkglpeypdlplvlpnvvhdgdftlqegkvralyagpahtpdgifvyfpdeqvlygncilkeklgnlsfadvkaypktlerlkalklpiktvigghdsplhgpelidhyealikaaaks	MMKGWMKCTLAGAVVLMASFWGGSVRAAGIELKQVSGPVYVVEDNYYVKENSMVYFGAKGVTVVGATWTPDTARELHKLIKRVSSKPVLEVINTNYHTDRAGGNAYWKSIGAKVVATRQTRDLMKSDWAEIVAFTRKGLPEYPDLPLVLPNVVHDGDFTLQDGKVRAFYAGPAHTPDGIFVYFPDEQVLYGNCILKEKLGNLSFANVKAYPQTIERLKAMKLPIKTVIGGHDSPLHGPELIDHYEELIKAAPQS	1	254	99.6063	0	0	0	254	Cluster_4	ChpA_family_subclass_B2_metallo-beta-lactamase_ImiS_NG_050415.1_cds_WP_063865298.1_1	Cluster_4	SP_Sec_SPI_	27-28	SP_Sec_SPI_	27-28	N_Y_H_T_D	C	H	.	.
B2_1160	GCF_001244565.1	631	631	Yersinia_intermedia	Bacteria-Pseudomonadota-Gammaproteobacteria-Enterobacterales-Yersiniaceae-Yersinia-	4756083	NZ_CWJI01000014.1	class_B2	363	-	21775	22465	21770	22513	ATGTCAAAAAAAACATTACTGCTATTAGGCTTATTAGTTATTTTCCAGAATGCTTACGCATCTAAAATATCATTAACAAAACTCAGTGATAATCTTTATGTCGTCGAAGATAACTATTACTATAAAGAAAACTCTATGGTTTATATTGGTAAAGAGCACATCACTGTTATTGGCGCCACTTGGACACCGGATACAGCTAAAGAATTGGATTTACAAATAAAGAAAATAAGCAAAAAACCCGTCACTGAAGTTATTAATACTAATTATCATACGGATAGAGCCGGTGGTAATCTATATTGGAAAAATAATGGTGCGGAAATAGTATCAACAAAAATGACGTATGATTTAATGTCAGCTCATTGGCAAGACATCGTAGAATTTACCCGTAAGGGAATACCT…	WP_019211763.1	subclass_B2_metallo-beta-lactamase	MSKKTLLLLGLLVIFQNAYASKISLTKLSDNLYVVEDNYYYKENSMVYIGKEHITVIGATWTPDTAKELDLQIKKISKKPVTEVINTNYHTDRAGGNLYWKNNGAEIVSTKMTYDLMSAHWQDIVEFTRKGIPEYPMIPLVLPTKTFDNNFDLQNGEIMTIYTGESHTPDGIFVYFPNEKTLYGNCIIKEKLGNLSSANLKEYPKTLQKLKNLNLDIKTVIGGHDSPIHGYELIDNYKKLIEEGNKS	ORF_OK	TRUE_HIT	gsvraagislkqvsgpvyvvednyyvkensmvyfgakgvtvvgatwtpdtarelhklikrvsskpvlevintnyhtdraggnaywksigakvvatrqtrdlmksdwaeivaftrkglpeypdlplvlpnvvhdgdftlqegkvralyagpahtpdgifvyfpdeqvlygncilkeklgnlsfadvkaypktlerlkalklpiktvigghdsplhgpelidhyealikaaak	QNAYASKISLTKLSDNLYVVEDNYYYKENSMVYIGKEHITVIGATWTPDTAKELDLQIKKISKKPVTEVINTNYHTDRAGGNLYWKNNGAEIVSTKMTYDLMSAHWQDIVEFTRKGIPEYPMIPLVLPTKTFDNNFDLQNGEIMTIYTGESHTPDGIFVYFPNEKTLYGNCIIKEKLGNLSSANLKEYPKTLQKLKNLNLDIKTVIGGHDSPIHGYELIDNYKKLIEEGNK	23	253	90.5512	0	0	0	247	Cluster_10	CLUSTER_NOT_IN_NCBI_AMR_REF_DB	Cluster_10	SP_Sec_SPI_	20-21	SP_Sec_SPI_	20-21	N_Y_H_T_D	C	N	.	.
B2_1161	GCF_001306015.1	196024	196024	Aeromonas_dhakensis	Bacteria-Pseudomonadota-Gammaproteobacteria-Aeromonadales-Aeromonadaceae-Aeromonas-	4783170	NZ_KQ464176.1	class_B2	535.2	+	1674618	1675377	1674619	1675380	ATGAAAGGTTGGATAAAGTGCGGGCTGGCCGGCGCCGTGGTGCTGGTGGCGAGCTTCTGGGGTGGCAGCGTGCGGGCGGCGGGGATGTCGCTGACGCAAGTGAGCGGCCCTGTCTATGTGGTCGAGGACAACTACTACATACAGGAAAACTCCATGGTCTATTTCGGGGCCAAGGGGGTGACGGTAGTGGGGGCGACCTGGACGCCAGATACCGCCCGTGAGCTGCACAAGCTGATCAAACGGGTCAGCCGCCAGCCGGTGCTGGAGGTGATCAACACCAACTACCACACCGACCGGGCGGGCGGTAACGCCTACTGGAAGTCCATCGGTGCCAAGGTGGTGGCGACTCGCCAGACCCGGGATCTGATGAAGAGCGACTGGGCCGAGATTGTCGCCTTT…	WP_054544101.1	CphA_family_subclass_B2_metallo-beta-lactamase	MKGWIKCGLAGAVVLVASFWGGSVRAAGMSLTQVSGPVYVVEDNYYIQENSMVYFGAKGVTVVGATWTPDTARELHKLIKRVSRQPVLEVINTNYHTDRAGGNAYWKSIGAKVVATRQTRDLMKSDWAEIVAFTRKGLPDYPDLPLVLPNVVHDGDFTLQEGKLRAFYAGPAHTPDGIFVYFPDQQVLYGNCILKEKLGNLSFADVKAYPQTIERLKAMKLPIKTVVGGHDSPLHGPELIDHYEALIKAVPQS	ORF_OK	TRUE_HIT	mmkgwikcglagavvllasfwggsvraagislkqvsgpvyvvednyyvkensmvyfgakgvtvvgatwtpdtarelhklikrvsskpvlevintnyhtdraggnaywksigakvvatrqtrdlmksdwaeivaftrkglpeypdlplvlpnvvhdgdftlqegkvralyagpahtpdgifvyfpdeqvlygncilkeklgnlsfadvkaypktlerlkalklpiktvigghdsplhgpelidhyealikaaaks	MMKGWIKCGLAGAVVLVASFWGGSVRAAGMSLTQVSGPVYVVEDNYYIQENSMVYFGAKGVTVVGATWTPDTARELHKLIKRVSRQPVLEVINTNYHTDRAGGNAYWKSIGAKVVATRQTRDLMKSDWAEIVAFTRKGLPDYPDLPLVLPNVVHDGDFTLQEGKLRAFYAGPAHTPDGIFVYFPDQQVLYGNCILKEKLGNLSFADVKAYPQTIERLKAMKLPIKTVVGGHDSPLHGPELIDHYEALIKAVPQS	1	254	99.6063	0	0	0	253	Cluster_4	ChpA_family_subclass_B2_metallo-beta-lactamase_ImiS_NG_050415.1_cds_WP_063865298.1_1	Cluster_4	SP_Sec_SPI_	26-27	SP_Sec_SPI_	26-27	N_Y_H_T_D	C	H	.	.
B2_1162	GCF_001439685.1	75588	75588	Pseudomonas_libanensis	Bacteria-Pseudomonadota-Gammaproteobacteria-Pseudomonadales-Pseudomonadaceae-Pseudomonas-Pseudomonas_fluorescens_group-	6214234	NZ_JYLH01000007.1	class_B2	365.2	+	68943	69624	68875	69636	ATGAAGCTTATTAATATCCTGTCAGCCATCAGCCTGGCCTGCATCACCTCCCAGGTCTTCGCTAACCAGAGTGACTTGACCCTTATCCACTTCAAAGGCCCGCTCTACATCGTTGAAGACAAGGAGTATGTGCAGGAGAACTCAATGGTCTACATTGGCGAGCAACACATCACGGTTATCGGCGCAACCTGGACCCCCGCCACCGCTGAAAAGCTGGAGCAGGAAATCAGGAAAATCAGCCCCCTGCCCATCAAGGAGGTGATCAACACCAACTACCACACCGACCGTGCGGGAGGTAACGCCTACTGGAGGAAGCTCGGCGCCAGTATTGTCTCCACGCAGATGACTTATGACCTGGAAAAAAGCCAATGGCGCAGTATTGTCGACTTTACCCGGCAA…	WP_057012521.1	subclass_B2_metallo-beta-lactamase_PFM-2	MKLINILSAISLACITSQVFANQSDLTLIHFKGPLYIVEDKEYVQENSMVYIGEQHITVIGATWTPATAEKLEQEIRKISPLPIKEVINTNYHTDRAGGNAYWRKLGASIVSTQMTYDLEKSQWRSIVDFTRQGMEHYPVLEQSLPDQVYPGDFALQNGHVRALYLGASHTEDGIFVYFPEERVLYGNCILKEKLGNMTFANRSEYPKTLKKLQGLISSGELPVEAIIAGHNSPIQSVELIDHYLNLLEHGEQ	ORF_OK	TRUE_HIT	aagislkqvsgpvyvvednyyvkensmvyfgakgvtvvgatwtpdtarelhklikrvsskpvlevintnyhtdraggnaywksigakvvatrqtrdlmksdwaeivaftrkglpeypdlplvlpnvvhdgdftlqegkvralyagpahtpdgifvyfpdeqvlygncilkeklgnlsfadvkaypktlerlkal....klpiktvigghdsplhgpelidhyealika	QSDLTLIHFKGPLYIVEDKEYVQENSMVYIGEQHITVIGATWTPATAEKLEQEIRKISPLPIKEVINTNYHTDRAGGNAYWRKLGASIVSTQMTYDLEKSQWRSIVDFTRQGMEHYPVLEQSLPDQVYPGDFALQNGHVRALYLGASHTEDGIFVYFPEERVLYGNCILKEKLGNMTFANRSEYPKTLKKLQGLissgELPVEAIIAGHNSPIQSVELIDHYLNLLEH	27	250	87.7953	4	0	0	253	Cluster_1	CLUSTER_NOT_IN_NCBI_AMR_REF_DB	Cluster_1	SP_Sec_SPI_	21-22	SP_Sec_SPI_	21-22	N_Y_H_T_D	C	H	.	.
B2_1163	GCF_001446465.1	654	654	Aeromonas_veronii	Bacteria-Pseudomonadota-Gammaproteobacteria-Aeromonadales-Aeromonadaceae-Aeromonas-	4533329	NZ_LKJN01000022.1	class_B2	548.4	+	28063	28822	28061	28825	ATGATGAAAGGTTGGATGAAGTGCGGATTGGCCGGGGCCGTGGTGCTGATGGCGAGTTTCTGGGGTGGCAGCGTGCGGGCGGCGGGGATCGAGCTCAAGCAGGTGAGCGGCCCTGTCTATGTGGTGGAGGACAACTACTACGTCAAAGAGAACTCGATGGTCTATTTCGGGGCCAAGGGGGTGACTGTGGTGGGGGCGACCTGGACGCCGGATACCGCCCGCGAGTTGCATAAGCTCATTAAACGGGTCAGCAGCAAGCCGGTGCTGGAGGTGATCAACACCAACTACCACACCGATCGGGCGGGCGGTAACGCCTACTGGAAGTCCATCGGGGCCAAGGTGGTGGCTACGCGCCAGACCCGGGATCTGATGAAGAGCGACTGGGCCGAGATTGTCGCC…	WP_081043470.1	CphA_family_subclass_B2_metallo-beta-lactamase	MMKGWMKCGLAGAVVLMASFWGGSVRAAGIELKQVSGPVYVVEDNYYVKENSMVYFGAKGVTVVGATWTPDTARELHKLIKRVSSKPVLEVINTNYHTDRAGGNAYWKSIGAKVVATRQTRDLMKSDWAEIVAFTRKGLPEYPDLPLVLPNVVHDGDFTLQEGKVRAFYAGPAHTPDGIFVYFPDEQVLYGNCILKEKLGNLSFANVKAYPQTIERLKAMKLPIKTVIGGHDSPLHGPELIDHYEELIKAAPQS	ORF_OK	TRUE_HIT	mmkgwikcglagavvllasfwggsvraagislkqvsgpvyvvednyyvkensmvyfgakgvtvvgatwtpdtarelhklikrvsskpvlevintnyhtdraggnaywksigakvvatrqtrdlmksdwaeivaftrkglpeypdlplvlpnvvhdgdftlqegkvralyagpahtpdgifvyfpdeqvlygncilkeklgnlsfadvkaypktlerlkalklpiktvigghdsplhgpelidhyealikaaaks	MMKGWMKCGLAGAVVLMASFWGGSVRAAGIELKQVSGPVYVVEDNYYVKENSMVYFGAKGVTVVGATWTPDTARELHKLIKRVSSKPVLEVINTNYHTDRAGGNAYWKSIGAKVVATRQTRDLMKSDWAEIVAFTRKGLPEYPDLPLVLPNVVHDGDFTLQEGKVRAFYAGPAHTPDGIFVYFPDEQVLYGNCILKEKLGNLSFANVKAYPQTIERLKAMKLPIKTVIGGHDSPLHGPELIDHYEELIKAAPQS	1	254	99.6063	0	0	0	254	Cluster_4	ChpA_family_subclass_B2_metallo-beta-lactamase_ImiS_NG_050415.1_cds_WP_063865298.1_1	Cluster_4	SP_Sec_SPI_	27-28	SP_Sec_SPI_	27-28	N_Y_H_T_D	C	H	.	.
B2_1164	GCF_001446505.1	654	654	Aeromonas_veronii	Bacteria-Pseudomonadota-Gammaproteobacteria-Aeromonadales-Aeromonadaceae-Aeromonas-	4533356	NZ_LKJP01000019.1	class_B2	548.4	+	28067	28826	28065	28829	ATGATGAAAGGTTGGATGAAGTGCGGATTGGCCGGGGCCGTGGTGCTGATGGCGAGTTTCTGGGGTGGCAGCGTGCGGGCGGCGGGGATCGAGCTCAAGCAGGTGAGCGGCCCTGTCTATGTGGTGGAGGACAACTACTACGTCAAAGAGAACTCGATGGTCTATTTCGGGGCCAAGGGGGTGACTGTGGTGGGGGCGACCTGGACGCCGGATACCGCCCGCGAGTTGCATAAGCTCATTAAACGGGTCAGCAGCAAGCCGGTGCTGGAGGTGATCAACACCAACTACCACACCGATCGGGCGGGCGGTAACGCCTACTGGAAGTCCATCGGGGCCAAGGTGGTGGCTACGCGCCAGACCCGGGATCTGATGAAGAGCGACTGGGCCGAGATTGTCGCC…	WP_081043470.1	CphA_family_subclass_B2_metallo-beta-lactamase	MMKGWMKCGLAGAVVLMASFWGGSVRAAGIELKQVSGPVYVVEDNYYVKENSMVYFGAKGVTVVGATWTPDTARELHKLIKRVSSKPVLEVINTNYHTDRAGGNAYWKSIGAKVVATRQTRDLMKSDWAEIVAFTRKGLPEYPDLPLVLPNVVHDGDFTLQEGKVRAFYAGPAHTPDGIFVYFPDEQVLYGNCILKEKLGNLSFANVKAYPQTIERLKAMKLPIKTVIGGHDSPLHGPELIDHYEELIKAAPQS	ORF_OK	TRUE_HIT	mmkgwikcglagavvllasfwggsvraagislkqvsgpvyvvednyyvkensmvyfgakgvtvvgatwtpdtarelhklikrvsskpvlevintnyhtdraggnaywksigakvvatrqtrdlmksdwaeivaftrkglpeypdlplvlpnvvhdgdftlqegkvralyagpahtpdgifvyfpdeqvlygncilkeklgnlsfadvkaypktlerlkalklpiktvigghdsplhgpelidhyealikaaaks	MMKGWMKCGLAGAVVLMASFWGGSVRAAGIELKQVSGPVYVVEDNYYVKENSMVYFGAKGVTVVGATWTPDTARELHKLIKRVSSKPVLEVINTNYHTDRAGGNAYWKSIGAKVVATRQTRDLMKSDWAEIVAFTRKGLPEYPDLPLVLPNVVHDGDFTLQEGKVRAFYAGPAHTPDGIFVYFPDEQVLYGNCILKEKLGNLSFANVKAYPQTIERLKAMKLPIKTVIGGHDSPLHGPELIDHYEELIKAAPQS	1	254	99.6063	0	0	0	254	Cluster_4	ChpA_family_subclass_B2_metallo-beta-lactamase_ImiS_NG_050415.1_cds_WP_063865298.1_1	Cluster_4	SP_Sec_SPI_	27-28	SP_Sec_SPI_	27-28	N_Y_H_T_D	C	H	.	.
B2_1165	GCF_001446535.1	654	654	Aeromonas_veronii	Bacteria-Pseudomonadota-Gammaproteobacteria-Aeromonadales-Aeromonadaceae-Aeromonas-	4662691	NZ_LKJQ01000092.1	class_B2	549.5	+	235	994	233	997	ATGATGAAAGGTTGGATAAAGTGCGGGTTGGCCGGGGCCGTGGTGCTGATGGCGAGTTTCTGGGGTGGCAGCGTGCGGGCGGCGGGGATCTCCCTCAAGCAGGTGAGCGGCCCTGTCTATGTGGTGGAGGATAACTACTACGTCAAAGAGAACTCCATGGTCTATTTCGGGGCCAAGGGGGTGACGGTGGTAGGGGCGACCTGGACGCCGGATACCGCCCGCGAGCTGCACAAGCTCATTAAACGGGTCAGCAGCAAGCCGGTGCTGGAGGTGATCAACACCAACTACCACACCGATCGGGCGGGCGGTAACGCCTACTGGAAGTCCATCGGGGCCAAGGTGGTGGCGACCCGTCAGACCCGGGATCTGATGAAGAGCGACTGGGCCGAGATTGTTGCC…	WP_081042837.1	CphA_family_subclass_B2_metallo-beta-lactamase	MMKGWIKCGLAGAVVLMASFWGGSVRAAGISLKQVSGPVYVVEDNYYVKENSMVYFGAKGVTVVGATWTPDTARELHKLIKRVSSKPVLEVINTNYHTDRAGGNAYWKSIGAKVVATRQTRDLMKSDWAEIVAFTRKGLPEYPDLPLVLPNVVHDGDFTLQEGKVRAFYAGPAHTPDGIFVYFPDEQVLYGNCILKEKLGNLSFANVKAYPQTIERLKAMKLPIKTVIGGHDSPLHGPELIDHYEELIKAVPQS	ORF_OK	TRUE_HIT	mmkgwikcglagavvllasfwggsvraagislkqvsgpvyvvednyyvkensmvyfgakgvtvvgatwtpdtarelhklikrvsskpvlevintnyhtdraggnaywksigakvvatrqtrdlmksdwaeivaftrkglpeypdlplvlpnvvhdgdftlqegkvralyagpahtpdgifvyfpdeqvlygncilkeklgnlsfadvkaypktlerlkalklpiktvigghdsplhgpelidhyealikaaaks	MMKGWIKCGLAGAVVLMASFWGGSVRAAGISLKQVSGPVYVVEDNYYVKENSMVYFGAKGVTVVGATWTPDTARELHKLIKRVSSKPVLEVINTNYHTDRAGGNAYWKSIGAKVVATRQTRDLMKSDWAEIVAFTRKGLPEYPDLPLVLPNVVHDGDFTLQEGKVRAFYAGPAHTPDGIFVYFPDEQVLYGNCILKEKLGNLSFANVKAYPQTIERLKAMKLPIKTVIGGHDSPLHGPELIDHYEELIKAVPQS	1	254	99.6063	0	0	0	254	Cluster_4	ChpA_family_subclass_B2_metallo-beta-lactamase_ImiS_NG_050415.1_cds_WP_063865298.1_1	Cluster_4	SP_Sec_SPI_	27-28	SP_Sec_SPI_	27-28	N_Y_H_T_D	C	H	.	.
B2_1166	GCF_001446555.1	654	654	Aeromonas_veronii	Bacteria-Pseudomonadota-Gammaproteobacteria-Aeromonadales-Aeromonadaceae-Aeromonas-	4531769	NZ_LKJR01000016.1	class_B2	548.4	+	28050	28809	28048	28812	ATGATGAAAGGTTGGATGAAGTGCGGATTGGCCGGGGCCGTGGTGCTGATGGCGAGTTTCTGGGGTGGCAGCGTGCGGGCGGCGGGGATCGAGCTCAAGCAGGTGAGCGGCCCTGTCTATGTGGTGGAGGACAACTACTACGTCAAAGAGAACTCGATGGTCTATTTCGGGGCCAAGGGGGTGACTGTGGTGGGGGCGACCTGGACGCCGGATACCGCCCGCGAGTTGCATAAGCTCATTAAACGGGTCAGCAGCAAGCCGGTGCTGGAGGTGATCAACACCAACTACCACACCGATCGGGCGGGCGGTAACGCCTACTGGAAGTCCATCGGGGCCAAGGTGGTGGCTACGCGCCAGACCCGGGATCTGATGAAGAGCGACTGGGCCGAGATTGTCGCC…	WP_081043470.1	CphA_family_subclass_B2_metallo-beta-lactamase	MMKGWMKCGLAGAVVLMASFWGGSVRAAGIELKQVSGPVYVVEDNYYVKENSMVYFGAKGVTVVGATWTPDTARELHKLIKRVSSKPVLEVINTNYHTDRAGGNAYWKSIGAKVVATRQTRDLMKSDWAEIVAFTRKGLPEYPDLPLVLPNVVHDGDFTLQEGKVRAFYAGPAHTPDGIFVYFPDEQVLYGNCILKEKLGNLSFANVKAYPQTIERLKAMKLPIKTVIGGHDSPLHGPELIDHYEELIKAAPQS	ORF_OK	TRUE_HIT	mmkgwikcglagavvllasfwggsvraagislkqvsgpvyvvednyyvkensmvyfgakgvtvvgatwtpdtarelhklikrvsskpvlevintnyhtdraggnaywksigakvvatrqtrdlmksdwaeivaftrkglpeypdlplvlpnvvhdgdftlqegkvralyagpahtpdgifvyfpdeqvlygncilkeklgnlsfadvkaypktlerlkalklpiktvigghdsplhgpelidhyealikaaaks	MMKGWMKCGLAGAVVLMASFWGGSVRAAGIELKQVSGPVYVVEDNYYVKENSMVYFGAKGVTVVGATWTPDTARELHKLIKRVSSKPVLEVINTNYHTDRAGGNAYWKSIGAKVVATRQTRDLMKSDWAEIVAFTRKGLPEYPDLPLVLPNVVHDGDFTLQEGKVRAFYAGPAHTPDGIFVYFPDEQVLYGNCILKEKLGNLSFANVKAYPQTIERLKAMKLPIKTVIGGHDSPLHGPELIDHYEELIKAAPQS	1	254	99.6063	0	0	0	254	Cluster_4	ChpA_family_subclass_B2_metallo-beta-lactamase_ImiS_NG_050415.1_cds_WP_063865298.1_1	Cluster_4	SP_Sec_SPI_	27-28	SP_Sec_SPI_	27-28	N_Y_H_T_D	C	H	.	.
B2_1167	GCF_001446575.1	654	654	Aeromonas_veronii	Bacteria-Pseudomonadota-Gammaproteobacteria-Aeromonadales-Aeromonadaceae-Aeromonas-	4533292	NZ_LKJS01000018.1	class_B2	548.4	+	28050	28809	28048	28812	ATGATGAAAGGTTGGATGAAGTGCGGATTGGCCGGGGCCGTGGTGCTGATGGCGAGTTTCTGGGGTGGCAGCGTGCGGGCGGCGGGGATCGAGCTCAAGCAGGTGAGCGGCCCTGTCTATGTGGTGGAGGACAACTACTACGTCAAAGAGAACTCGATGGTCTATTTCGGGGCCAAGGGGGTGACTGTGGTGGGGGCGACCTGGACGCCGGATACCGCCCGCGAGTTGCATAAGCTCATTAAACGGGTCAGCAGCAAGCCGGTGCTGGAGGTGATCAACACCAACTACCACACCGATCGGGCGGGCGGTAACGCCTACTGGAAGTCCATCGGGGCCAAGGTGGTGGCTACGCGCCAGACCCGGGATCTGATGAAGAGCGACTGGGCCGAGATTGTCGCC…	WP_081043470.1	CphA_family_subclass_B2_metallo-beta-lactamase	MMKGWMKCGLAGAVVLMASFWGGSVRAAGIELKQVSGPVYVVEDNYYVKENSMVYFGAKGVTVVGATWTPDTARELHKLIKRVSSKPVLEVINTNYHTDRAGGNAYWKSIGAKVVATRQTRDLMKSDWAEIVAFTRKGLPEYPDLPLVLPNVVHDGDFTLQEGKVRAFYAGPAHTPDGIFVYFPDEQVLYGNCILKEKLGNLSFANVKAYPQTIERLKAMKLPIKTVIGGHDSPLHGPELIDHYEELIKAAPQS	ORF_OK	TRUE_HIT	mmkgwikcglagavvllasfwggsvraagislkqvsgpvyvvednyyvkensmvyfgakgvtvvgatwtpdtarelhklikrvsskpvlevintnyhtdraggnaywksigakvvatrqtrdlmksdwaeivaftrkglpeypdlplvlpnvvhdgdftlqegkvralyagpahtpdgifvyfpdeqvlygncilkeklgnlsfadvkaypktlerlkalklpiktvigghdsplhgpelidhyealikaaaks	MMKGWMKCGLAGAVVLMASFWGGSVRAAGIELKQVSGPVYVVEDNYYVKENSMVYFGAKGVTVVGATWTPDTARELHKLIKRVSSKPVLEVINTNYHTDRAGGNAYWKSIGAKVVATRQTRDLMKSDWAEIVAFTRKGLPEYPDLPLVLPNVVHDGDFTLQEGKVRAFYAGPAHTPDGIFVYFPDEQVLYGNCILKEKLGNLSFANVKAYPQTIERLKAMKLPIKTVIGGHDSPLHGPELIDHYEELIKAAPQS	1	254	99.6063	0	0	0	254	Cluster_4	ChpA_family_subclass_B2_metallo-beta-lactamase_ImiS_NG_050415.1_cds_WP_063865298.1_1	Cluster_4	SP_Sec_SPI_	27-28	SP_Sec_SPI_	27-28	N_Y_H_T_D	C	H	.	.
B2_1168	GCF_001446635.1	654	654	Aeromonas_veronii	Bacteria-Pseudomonadota-Gammaproteobacteria-Aeromonadales-Aeromonadaceae-Aeromonas-	4680270	NZ_LKJV01000008.1	class_B2	544.9	+	277888	278647	277886	278650	ATGATGAAAGGTTGGATAAAGTGCGGGTTGGCCGGGGCCGTGGTGCTGATGGCGAGTTTCTGGGGTGGCAGCGTGCGGGCGGCGGGGATCTCCCTCAAGCAGGTGAGCGGCCCTGTCTATGTGGTGGAGGATAACTACTACGTCAAAGAGAACTCCATGGTCTATTTCGGGGCCAAGGGGGTGACGGTGGTAGGGGCGACCTGGACGCCGGATACCGCCCGCGAGCTGCACAAGCTCATTAAACGGGTCAGCAGCAAGCCGGTGCTGGAGGTGATCAACACCAACTACCACACCGATCGGGCGGGCGGTAACGCCTACTGGAAGTCCATCGGGGCCAAGGTGGTGGCGACCCGTCAGACCCGGGATCTGATGAAGAGCGACTGGGCCGAGATTGTTGCC…	WP_081042837.1	CphA_family_subclass_B2_metallo-beta-lactamase	MMKGWIKCGLAGAVVLMASFWGGSVRAAGISLKQVSGPVYVVEDNYYVKENSMVYFGAKGVTVVGATWTPDTARELHKLIKRVSSKPVLEVINTNYHTDRAGGNAYWKSIGAKVVATRQTRDLMKSDWAEIVAFTRKGLPEYPDLPLVLPNVVHDGDFTLQEGKVRAFYAGPAHTPDGIFVYFPDEQVLYGNCILKEKLGNLSFANVKAYPQTIERLKAMKLPIKTVIGGHDSPLHGPELIDHYEELIKAVPQS	ORF_OK	TRUE_HIT	mmkgwikcglagavvllasfwggsvraagislkqvsgpvyvvednyyvkensmvyfgakgvtvvgatwtpdtarelhklikrvsskpvlevintnyhtdraggnaywksigakvvatrqtrdlmksdwaeivaftrkglpeypdlplvlpnvvhdgdftlqegkvralyagpahtpdgifvyfpdeqvlygncilkeklgnlsfadvkaypktlerlkalklpiktvigghdsplhgpelidhyealikaaaks	MMKGWIKCGLAGAVVLMASFWGGSVRAAGISLKQVSGPVYVVEDNYYVKENSMVYFGAKGVTVVGATWTPDTARELHKLIKRVSSKPVLEVINTNYHTDRAGGNAYWKSIGAKVVATRQTRDLMKSDWAEIVAFTRKGLPEYPDLPLVLPNVVHDGDFTLQEGKVRAFYAGPAHTPDGIFVYFPDEQVLYGNCILKEKLGNLSFANVKAYPQTIERLKAMKLPIKTVIGGHDSPLHGPELIDHYEELIKAVPQS	1	254	99.6063	0	0	0	254	Cluster_4	ChpA_family_subclass_B2_metallo-beta-lactamase_ImiS_NG_050415.1_cds_WP_063865298.1_1	Cluster_4	SP_Sec_SPI_	27-28	SP_Sec_SPI_	27-28	N_Y_H_T_D	C	H	.	.
B2_1169	GCF_001446645.1	654	654	Aeromonas_veronii	Bacteria-Pseudomonadota-Gammaproteobacteria-Aeromonadales-Aeromonadaceae-Aeromonas-	4678554	NZ_LKJW01000013.1	class_B2	544.9	-	12903	13662	12901	13662	ATGAAAGGTTGGATAAAGTGCGGGTTGGCCGGGGCCGTGGTGCTGATGGCGAGTTTCTGGGGTGGCAGCGTGCGGGCGGCGGGGATCTCCCTCAAGCAGGTGAGCGGCCCTGTCTATGTGGTGGAGGATAACTACTACGTCAAAGAGAACTCCATGGTCTATTTCGGGGCCAAGGGGGTGACGGTGGTAGGGGCGACCTGGACGCCGGATACCGCCCGCGAGCTGCACAAGCTCATTAAACGGGTCAGCAGCAAGCCGGTGCTGGAGGTGATCAACACCAACTACCACACCGATCGGGCGGGCGGTAACGCCTACTGGAAGTCCATCGGGGCCAAGGTGGTGGCGACCCGTCAGACCCGGGATCTGATGAAGAGCGACTGGGCCGAGATTGTTGCCTTT…	WP_058059826.1	CphA_family_subclass_B2_metallo-beta-lactamase	MKGWIKCGLAGAVVLMASFWGGSVRAAGISLKQVSGPVYVVEDNYYVKENSMVYFGAKGVTVVGATWTPDTARELHKLIKRVSSKPVLEVINTNYHTDRAGGNAYWKSIGAKVVATRQTRDLMKSDWAEIVAFTRKGLPEYPDLPLVLPNVVHDGDFTLQEGKVRAFYAGPAHTPDGIFVYFPDEQVLYGNCILKEKLGNLSFANVKAYPQTIERLKAMKLPIKTVIGGHDSPLHGPELIDHYEELIKAVPQS	ORF_OK	TRUE_HIT	mmkgwikcglagavvllasfwggsvraagislkqvsgpvyvvednyyvkensmvyfgakgvtvvgatwtpdtarelhklikrvsskpvlevintnyhtdraggnaywksigakvvatrqtrdlmksdwaeivaftrkglpeypdlplvlpnvvhdgdftlqegkvralyagpahtpdgifvyfpdeqvlygncilkeklgnlsfadvkaypktlerlkalklpiktvigghdsplhgpelidhyealikaaaks	MMKGWIKCGLAGAVVLMASFWGGSVRAAGISLKQVSGPVYVVEDNYYVKENSMVYFGAKGVTVVGATWTPDTARELHKLIKRVSSKPVLEVINTNYHTDRAGGNAYWKSIGAKVVATRQTRDLMKSDWAEIVAFTRKGLPEYPDLPLVLPNVVHDGDFTLQEGKVRAFYAGPAHTPDGIFVYFPDEQVLYGNCILKEKLGNLSFANVKAYPQTIERLKAMKLPIKTVIGGHDSPLHGPELIDHYEELIKAVPQS	1	254	99.6063	0	0	0	253	Cluster_4	ChpA_family_subclass_B2_metallo-beta-lactamase_ImiS_NG_050415.1_cds_WP_063865298.1_1	Cluster_4	SP_Sec_SPI_	26-27	SP_Sec_SPI_	26-27	N_Y_H_T_D	C	H	.	.
B2_117	GCF_008121335.1	47883	47883	Pseudomonas_synxantha	Bacteria-Pseudomonadota-Gammaproteobacteria-Pseudomonadales-Pseudomonadaceae-Pseudomonas-Pseudomonas_fluorescens_group-	6820225	NZ_VSRO01000017.1	class_B2	368.4	+	35488	36214	35465	36226	ATGAAAGTTATCAATATCCTCTCAGCCGTCAGCATGTTCTGCATCACCTGCCAGGCACTCGCTAACGATATAAACCTTACTCTTACCCACTTCAAGGGCCCCCTCTACATCGTGGAAGACAAGGAGTATGTGCAGGAAAACTCAATGGTGTATATCGGTGCGCAAGACATCACAATTATCGGCGCAACCTGGACCCCCGCCACCGCTGAAAAGCTGGAGCAGGAAATCAGGAAAATCAGCTCCCTGCCCATCAAAGAGGTGATCAACACCAACTACCACACCGACCGTGCGGGAGGTAACGCTTATTGGAAGAAACTTGGCGCCAGTATTGTCTCAACTCAGATGACTTATGACCTGGAAAAAACCAATTGGCGCGGTATTGTCGACTTTACCCGGCAA…	WP_148044470.1	subclass_B2_metallo-beta-lactamase_PFM-1	MKVINILSAVSMFCITCQALANDINLTLTHFKGPLYIVEDKEYVQENSMVYIGAQDITIIGATWTPATAEKLEQEIRKISSLPIKEVINTNYHTDRAGGNAYWKKLGASIVSTQMTYDLEKTNWRGIVDFTRQGMEHYPVLEQSLPDQVYPGDFALQNGHVRALYLGASHTEDGIFVYFPEERVLYGNCILKEKLGNMTFANRSEYPKTLKKLQGLIRSGELSVEAIIAGHNSPIQSVELIDHYLNLLEHGEQ	ORF_OK	TRUE_HIT	avvllasfwggsvraa.gislkqvsgpvyvvednyyvkensmvyfgakgvtvvgatwtpdtarelhklikrvsskpvlevintnyhtdraggnaywksigakvvatrqtrdlmksdwaeivaftrkglpeypdlplvlpnvvhdgdftlqegkvralyagpahtpdgifvyfpdeqvlygncilkeklgnlsfadvkaypktlerlkal....klpiktvigghdsplhgpelidhyealika	SAVSMFCITCQALANDiNLTLTHFKGPLYIVEDKEYVQENSMVYIGAQDITIIGATWTPATAEKLEQEIRKISSLPIKEVINTNYHTDRAGGNAYWKKLGASIVSTQMTYDLEKTNWRGIVDFTRQGMEHYPVLEQSLPDQVYPGDFALQNGHVRALYLGASHTEDGIFVYFPEERVLYGNCILKEKLGNMTFANRSEYPKTLKKLQGLirsgELSVEAIIAGHNSPIQSVELIDHYLNLLEH	13	250	93.3071	5	0	0	253	Cluster_1	CLUSTER_NOT_IN_NCBI_AMR_REF_DB	Cluster_1	SP_Sec_SPI_	21-22	SP_Sec_SPI_	21-22	N_Y_H_T_D	C	H	.	.
B2_1170	GCF_001446675.1	654	654	Aeromonas_veronii	Bacteria-Pseudomonadota-Gammaproteobacteria-Aeromonadales-Aeromonadaceae-Aeromonas-	4679977	NZ_LKJX01000024.1	class_B2	544.9	-	12903	13662	12901	13665	ATGATGAAAGGTTGGATAAAGTGCGGGTTGGCCGGGGCCGTGGTGCTGATGGCGAGTTTCTGGGGTGGCAGCGTGCGGGCGGCGGGGATCTCCCTCAAGCAGGTGAGCGGCCCTGTCTATGTGGTGGAGGATAACTACTACGTCAAAGAGAACTCCATGGTCTATTTCGGGGCCAAGGGGGTGACGGTGGTAGGGGCGACCTGGACGCCGGATACCGCCCGCGAGCTGCACAAGCTCATTAAACGGGTCAGCAGCAAGCCGGTGCTGGAGGTGATCAACACCAACTACCACACCGATCGGGCGGGCGGTAACGCCTACTGGAAGTCCATCGGGGCCAAGGTGGTGGCGACCCGTCAGACCCGGGATCTGATGAAGAGCGACTGGGCCGAGATTGTTGCC…	WP_081042837.1	CphA_family_subclass_B2_metallo-beta-lactamase	MMKGWIKCGLAGAVVLMASFWGGSVRAAGISLKQVSGPVYVVEDNYYVKENSMVYFGAKGVTVVGATWTPDTARELHKLIKRVSSKPVLEVINTNYHTDRAGGNAYWKSIGAKVVATRQTRDLMKSDWAEIVAFTRKGLPEYPDLPLVLPNVVHDGDFTLQEGKVRAFYAGPAHTPDGIFVYFPDEQVLYGNCILKEKLGNLSFANVKAYPQTIERLKAMKLPIKTVIGGHDSPLHGPELIDHYEELIKAVPQS	ORF_OK	TRUE_HIT	mmkgwikcglagavvllasfwggsvraagislkqvsgpvyvvednyyvkensmvyfgakgvtvvgatwtpdtarelhklikrvsskpvlevintnyhtdraggnaywksigakvvatrqtrdlmksdwaeivaftrkglpeypdlplvlpnvvhdgdftlqegkvralyagpahtpdgifvyfpdeqvlygncilkeklgnlsfadvkaypktlerlkalklpiktvigghdsplhgpelidhyealikaaaks	MMKGWIKCGLAGAVVLMASFWGGSVRAAGISLKQVSGPVYVVEDNYYVKENSMVYFGAKGVTVVGATWTPDTARELHKLIKRVSSKPVLEVINTNYHTDRAGGNAYWKSIGAKVVATRQTRDLMKSDWAEIVAFTRKGLPEYPDLPLVLPNVVHDGDFTLQEGKVRAFYAGPAHTPDGIFVYFPDEQVLYGNCILKEKLGNLSFANVKAYPQTIERLKAMKLPIKTVIGGHDSPLHGPELIDHYEELIKAVPQS	1	254	99.6063	0	0	0	254	Cluster_4	ChpA_family_subclass_B2_metallo-beta-lactamase_ImiS_NG_050415.1_cds_WP_063865298.1_1	Cluster_4	SP_Sec_SPI_	27-28	SP_Sec_SPI_	27-28	N_Y_H_T_D	C	H	.	.
B2_1171	GCF_001446695.1	654	654	Aeromonas_veronii	Bacteria-Pseudomonadota-Gammaproteobacteria-Aeromonadales-Aeromonadaceae-Aeromonas-	4675329	NZ_LKJY01000002.1	class_B2	544.9	-	12903	13662	12901	13665	ATGATGAAAGGTTGGATAAAGTGCGGGTTGGCCGGGGCCGTGGTGCTGATGGCGAGTTTCTGGGGTGGCAGCGTGCGGGCGGCGGGGATCTCCCTCAAGCAGGTGAGCGGCCCTGTCTATGTGGTGGAGGATAACTACTACGTCAAAGAGAACTCCATGGTCTATTTCGGGGCCAAGGGGGTGACGGTGGTAGGGGCGACCTGGACGCCGGATACCGCCCGCGAGCTGCACAAGCTCATTAAACGGGTCAGCAGCAAGCCGGTGCTGGAGGTGATCAACACCAACTACCACACCGATCGGGCGGGCGGTAACGCCTACTGGAAGTCCATCGGGGCCAAGGTGGTGGCGACCCGTCAGACCCGGGATCTGATGAAGAGCGACTGGGCCGAGATTGTTGCC…	WP_081042837.1	CphA_family_subclass_B2_metallo-beta-lactamase	MMKGWIKCGLAGAVVLMASFWGGSVRAAGISLKQVSGPVYVVEDNYYVKENSMVYFGAKGVTVVGATWTPDTARELHKLIKRVSSKPVLEVINTNYHTDRAGGNAYWKSIGAKVVATRQTRDLMKSDWAEIVAFTRKGLPEYPDLPLVLPNVVHDGDFTLQEGKVRAFYAGPAHTPDGIFVYFPDEQVLYGNCILKEKLGNLSFANVKAYPQTIERLKAMKLPIKTVIGGHDSPLHGPELIDHYEELIKAVPQS	ORF_OK	TRUE_HIT	mmkgwikcglagavvllasfwggsvraagislkqvsgpvyvvednyyvkensmvyfgakgvtvvgatwtpdtarelhklikrvsskpvlevintnyhtdraggnaywksigakvvatrqtrdlmksdwaeivaftrkglpeypdlplvlpnvvhdgdftlqegkvralyagpahtpdgifvyfpdeqvlygncilkeklgnlsfadvkaypktlerlkalklpiktvigghdsplhgpelidhyealikaaaks	MMKGWIKCGLAGAVVLMASFWGGSVRAAGISLKQVSGPVYVVEDNYYVKENSMVYFGAKGVTVVGATWTPDTARELHKLIKRVSSKPVLEVINTNYHTDRAGGNAYWKSIGAKVVATRQTRDLMKSDWAEIVAFTRKGLPEYPDLPLVLPNVVHDGDFTLQEGKVRAFYAGPAHTPDGIFVYFPDEQVLYGNCILKEKLGNLSFANVKAYPQTIERLKAMKLPIKTVIGGHDSPLHGPELIDHYEELIKAVPQS	1	254	99.6063	0	0	0	254	Cluster_4	ChpA_family_subclass_B2_metallo-beta-lactamase_ImiS_NG_050415.1_cds_WP_063865298.1_1	Cluster_4	SP_Sec_SPI_	27-28	SP_Sec_SPI_	27-28	N_Y_H_T_D	C	H	.	.
B2_1172	GCF_001446735.1	654	654	Aeromonas_veronii	Bacteria-Pseudomonadota-Gammaproteobacteria-Aeromonadales-Aeromonadaceae-Aeromonas-	4681244	NZ_LKKA01000013.1	class_B2	544.9	-	12903	13662	12901	13665	ATGATGAAAGGTTGGATAAAGTGCGGGTTGGCCGGGGCCGTGGTGCTGATGGCGAGTTTCTGGGGTGGCAGCGTGCGGGCGGCGGGGATCTCCCTCAAGCAGGTGAGCGGCCCTGTCTATGTGGTGGAGGATAACTACTACGTCAAAGAGAACTCCATGGTCTATTTCGGGGCCAAGGGGGTGACGGTGGTAGGGGCGACCTGGACGCCGGATACCGCCCGCGAGCTGCACAAGCTCATTAAACGGGTCAGCAGCAAGCCGGTGCTGGAGGTGATCAACACCAACTACCACACCGATCGGGCGGGCGGTAACGCCTACTGGAAGTCCATCGGGGCCAAGGTGGTGGCGACCCGTCAGACCCGGGATCTGATGAAGAGCGACTGGGCCGAGATTGTTGCC…	WP_081042837.1	CphA_family_subclass_B2_metallo-beta-lactamase	MMKGWIKCGLAGAVVLMASFWGGSVRAAGISLKQVSGPVYVVEDNYYVKENSMVYFGAKGVTVVGATWTPDTARELHKLIKRVSSKPVLEVINTNYHTDRAGGNAYWKSIGAKVVATRQTRDLMKSDWAEIVAFTRKGLPEYPDLPLVLPNVVHDGDFTLQEGKVRAFYAGPAHTPDGIFVYFPDEQVLYGNCILKEKLGNLSFANVKAYPQTIERLKAMKLPIKTVIGGHDSPLHGPELIDHYEELIKAVPQS	ORF_OK	TRUE_HIT	mmkgwikcglagavvllasfwggsvraagislkqvsgpvyvvednyyvkensmvyfgakgvtvvgatwtpdtarelhklikrvsskpvlevintnyhtdraggnaywksigakvvatrqtrdlmksdwaeivaftrkglpeypdlplvlpnvvhdgdftlqegkvralyagpahtpdgifvyfpdeqvlygncilkeklgnlsfadvkaypktlerlkalklpiktvigghdsplhgpelidhyealikaaaks	MMKGWIKCGLAGAVVLMASFWGGSVRAAGISLKQVSGPVYVVEDNYYVKENSMVYFGAKGVTVVGATWTPDTARELHKLIKRVSSKPVLEVINTNYHTDRAGGNAYWKSIGAKVVATRQTRDLMKSDWAEIVAFTRKGLPEYPDLPLVLPNVVHDGDFTLQEGKVRAFYAGPAHTPDGIFVYFPDEQVLYGNCILKEKLGNLSFANVKAYPQTIERLKAMKLPIKTVIGGHDSPLHGPELIDHYEELIKAVPQS	1	254	99.6063	0	0	0	254	Cluster_4	ChpA_family_subclass_B2_metallo-beta-lactamase_ImiS_NG_050415.1_cds_WP_063865298.1_1	Cluster_4	SP_Sec_SPI_	27-28	SP_Sec_SPI_	27-28	N_Y_H_T_D	C	H	.	.
B2_1173	GCF_001446755.1	654	654	Aeromonas_veronii	Bacteria-Pseudomonadota-Gammaproteobacteria-Aeromonadales-Aeromonadaceae-Aeromonas-	4679941	NZ_LKKB01000007.1	class_B2	545.8	+	134004	134763	134002	134766	ATGATGAAAGGTTGGATAAAGTGCGGGTTGGCCGGGGCCGTGGTGCTGATGGCGAGTTTCTGGGGTGGCAGCGTGCGGGCGGCGGGGATCTCCCTCAAGCAGGTGAGCGGCCCTGTCTATGTGGTGGAGGATAACTACTACGTCAAAGAGAACTCCATGGTCTATTTCGGGGCCAAGGGGGTGACGGTGGTAGGGGCGACCTGGACGCCGGATACCGCCCGCGAGCTGCACAAGCTCATTAAACGGGTCAGCAGCAAGCCGGTGCTGGAGGTGATCAACACCAACTACCACACCGATCGGGCGGGCGGTAACGCCTACTGGAAGTCCATCGGGGCCAAGGTGGTGGCGACCCGTCAGACCCGGGATCTGATGAAGAGCGACTGGGCCGAGATTGTTGCC…	WP_081042837.1	CphA_family_subclass_B2_metallo-beta-lactamase	MMKGWIKCGLAGAVVLMASFWGGSVRAAGISLKQVSGPVYVVEDNYYVKENSMVYFGAKGVTVVGATWTPDTARELHKLIKRVSSKPVLEVINTNYHTDRAGGNAYWKSIGAKVVATRQTRDLMKSDWAEIVAFTRKGLPEYPDLPLVLPNVVHDGDFTLQEGKVRAFYAGPAHTPDGIFVYFPDEQVLYGNCILKEKLGNLSFANVKAYPQTIERLKAMKLPIKTVIGGHDSPLHGPELIDHYEELIKAVPQS	ORF_OK	TRUE_HIT	mmkgwikcglagavvllasfwggsvraagislkqvsgpvyvvednyyvkensmvyfgakgvtvvgatwtpdtarelhklikrvsskpvlevintnyhtdraggnaywksigakvvatrqtrdlmksdwaeivaftrkglpeypdlplvlpnvvhdgdftlqegkvralyagpahtpdgifvyfpdeqvlygncilkeklgnlsfadvkaypktlerlkalklpiktvigghdsplhgpelidhyealikaaaks	MMKGWIKCGLAGAVVLMASFWGGSVRAAGISLKQVSGPVYVVEDNYYVKENSMVYFGAKGVTVVGATWTPDTARELHKLIKRVSSKPVLEVINTNYHTDRAGGNAYWKSIGAKVVATRQTRDLMKSDWAEIVAFTRKGLPEYPDLPLVLPNVVHDGDFTLQEGKVRAFYAGPAHTPDGIFVYFPDEQVLYGNCILKEKLGNLSFANVKAYPQTIERLKAMKLPIKTVIGGHDSPLHGPELIDHYEELIKAVPQS	1	254	99.6063	0	0	0	254	Cluster_4	ChpA_family_subclass_B2_metallo-beta-lactamase_ImiS_NG_050415.1_cds_WP_063865298.1_1	Cluster_4	SP_Sec_SPI_	27-28	SP_Sec_SPI_	27-28	N_Y_H_T_D	C	H	.	.
B2_1174	GCF_001446775.1	654	654	Aeromonas_veronii	Bacteria-Pseudomonadota-Gammaproteobacteria-Aeromonadales-Aeromonadaceae-Aeromonas-	4675505	NZ_LKKC01000048.1	class_B2	545.5	+	629	1388	630	1391	ATGAAAGGTTGGATAAAGTGCGGGTTGGCCGGGGCCGTGGTGCTGATGGCGAGTTTCTGGGGTGGCAGCGGGCGGGCGGCGGGGATCTCCCTCAAGCAGGTGAGCGGCCCTGTCTATGTGGTGGAGGATAACTACTACGTCAAAGAGAACTCCATGGTCTATTTCGGGGCCAAGGGGGTGACGGTGGTAGGGGCGACCTGGACGCCGGATACCGCCCGCGAGCTGCACAAGCTCATTAAACGGGTCAGCAGCAAGCCGGTGCTGGAGGTGATCAACACCAACTACCACACCGATCGGGCGGGCGGTAACGCCTACTGGAAGTCCATCGGGGCCAAGGTGGTGGCGACCCGTCAGACCCGGGATCTGATGAAGAGCGACTGGGCCGAGATTGTTGCCTTT…	WP_058063216.1	CphA_family_subclass_B2_metallo-beta-lactamase	MKGWIKCGLAGAVVLMASFWGGSGRAAGISLKQVSGPVYVVEDNYYVKENSMVYFGAKGVTVVGATWTPDTARELHKLIKRVSSKPVLEVINTNYHTDRAGGNAYWKSIGAKVVATRQTRDLMKSDWAEIVAFTRKGLPEYPDLPLVLPNVVHDGDFTLQEGKVRAFYAGPAHTPDGIFVYFPDEQVLYGNCILKEKLGNLSFANVKAYPQTIERLKAMKLPIKTVIGGHDSPLHGPELIDHYEELIKAVPQS	ORF_OK	TRUE_HIT	mmkgwikcglagavvllasfwggsvraagislkqvsgpvyvvednyyvkensmvyfgakgvtvvgatwtpdtarelhklikrvsskpvlevintnyhtdraggnaywksigakvvatrqtrdlmksdwaeivaftrkglpeypdlplvlpnvvhdgdftlqegkvralyagpahtpdgifvyfpdeqvlygncilkeklgnlsfadvkaypktlerlkalklpiktvigghdsplhgpelidhyealikaaaks	MMKGWIKCGLAGAVVLMASFWGGSGRAAGISLKQVSGPVYVVEDNYYVKENSMVYFGAKGVTVVGATWTPDTARELHKLIKRVSSKPVLEVINTNYHTDRAGGNAYWKSIGAKVVATRQTRDLMKSDWAEIVAFTRKGLPEYPDLPLVLPNVVHDGDFTLQEGKVRAFYAGPAHTPDGIFVYFPDEQVLYGNCILKEKLGNLSFANVKAYPQTIERLKAMKLPIKTVIGGHDSPLHGPELIDHYEELIKAVPQS	1	254	99.6063	0	0	0	253	Cluster_4	ChpA_family_subclass_B2_metallo-beta-lactamase_ImiS_NG_050415.1_cds_WP_063865298.1_1	Cluster_4	SP_Sec_SPI_	26-27	SP_Sec_SPI_	26-27	N_Y_H_T_D	C	H	.	.
B2_1175	GCF_001446795.1	654	654	Aeromonas_veronii	Bacteria-Pseudomonadota-Gammaproteobacteria-Aeromonadales-Aeromonadaceae-Aeromonas-	4679643	NZ_LKKD01000013.1	class_B2	544.8	-	12903	13662	12901	13662	ATGAAAGGTTGGATAAAGTGCGGGTTGGCCGGGGCCGTGGTGCTGATGGCGAGTTTCTGGGGTGGCAGCGTGCGGGCGGCGGGGATCTCCCTCAAGCAGGTGAGCGGCCCTGTCTATGTGGTGGAGGATAACTACTACGTCAAAGAGAACTCCATGGTCTATTTCGGGGCCAAGGGGGTGACGGTGGTAGGGGCGACCTGGACGCCGGATACCGCCCGCGAGCTGCACAAGCTCATTAAACGGGTCAGCAGCAAGCCGGTGCTGGAGGTGATCAACACCAACTACCACACCGATCGGGCGGGCGGTAACGCCTACTGGAAGTCCATCGGGGCCAAGGTGGTGGCGACCCGTCAGACCCGGGATCTGATGAAGAGCGACTGGGCCGAGATTGTTGCCTTT…	WP_058059826.1	CphA_family_subclass_B2_metallo-beta-lactamase	MKGWIKCGLAGAVVLMASFWGGSVRAAGISLKQVSGPVYVVEDNYYVKENSMVYFGAKGVTVVGATWTPDTARELHKLIKRVSSKPVLEVINTNYHTDRAGGNAYWKSIGAKVVATRQTRDLMKSDWAEIVAFTRKGLPEYPDLPLVLPNVVHDGDFTLQEGKVRAFYAGPAHTPDGIFVYFPDEQVLYGNCILKEKLGNLSFANVKAYPQTIERLKAMKLPIKTVIGGHDSPLHGPELIDHYEELIKAVPQS	ORF_OK	TRUE_HIT	mmkgwikcglagavvllasfwggsvraagislkqvsgpvyvvednyyvkensmvyfgakgvtvvgatwtpdtarelhklikrvsskpvlevintnyhtdraggnaywksigakvvatrqtrdlmksdwaeivaftrkglpeypdlplvlpnvvhdgdftlqegkvralyagpahtpdgifvyfpdeqvlygncilkeklgnlsfadvkaypktlerlkalklpiktvigghdsplhgpelidhyealikaaaks	MMKGWIKCGLAGAVVLMASFWGGSVRAAGISLKQVSGPVYVVEDNYYVKENSMVYFGAKGVTVVGATWTPDTARELHKLIKRVSSKPVLEVINTNYHTDRAGGNAYWKSIGAKVVATRQTRDLMKSDWAEIVAFTRKGLPEYPDLPLVLPNVVHDGDFTLQEGKVRAFYAGPAHTPDGIFVYFPDEQVLYGNCILKEKLGNLSFANVKAYPQTIERLKAMKLPIKTVIGGHDSPLHGPELIDHYEELIKAVPQS	1	254	99.6063	0	0	0	253	Cluster_4	ChpA_family_subclass_B2_metallo-beta-lactamase_ImiS_NG_050415.1_cds_WP_063865298.1_1	Cluster_4	SP_Sec_SPI_	26-27	SP_Sec_SPI_	26-27	N_Y_H_T_D	C	H	.	.
B2_1176	GCF_001446815.1	654	654	Aeromonas_veronii	Bacteria-Pseudomonadota-Gammaproteobacteria-Aeromonadales-Aeromonadaceae-Aeromonas-	4680422	NZ_LKKE01000024.1	class_B2	544.9	-	12903	13662	12901	13662	ATGAAAGGTTGGATAAAGTGCGGGTTGGCCGGGGCCGTGGTGCTGATGGCGAGTTTCTGGGGTGGCAGCGTGCGGGCGGCGGGGATCTCCCTCAAGCAGGTGAGCGGCCCTGTCTATGTGGTGGAGGATAACTACTACGTCAAAGAGAACTCCATGGTCTATTTCGGGGCCAAGGGGGTGACGGTGGTAGGGGCGACCTGGACGCCGGATACCGCCCGCGAGCTGCACAAGCTCATTAAACGGGTCAGCAGCAAGCCGGTGCTGGAGGTGATCAACACCAACTACCACACCGATCGGGCGGGCGGTAACGCCTACTGGAAGTCCATCGGGGCCAAGGTGGTGGCGACCCGTCAGACCCGGGATCTGATGAAGAGCGACTGGGCCGAGATTGTTGCCTTT…	WP_058059826.1	CphA_family_subclass_B2_metallo-beta-lactamase	MKGWIKCGLAGAVVLMASFWGGSVRAAGISLKQVSGPVYVVEDNYYVKENSMVYFGAKGVTVVGATWTPDTARELHKLIKRVSSKPVLEVINTNYHTDRAGGNAYWKSIGAKVVATRQTRDLMKSDWAEIVAFTRKGLPEYPDLPLVLPNVVHDGDFTLQEGKVRAFYAGPAHTPDGIFVYFPDEQVLYGNCILKEKLGNLSFANVKAYPQTIERLKAMKLPIKTVIGGHDSPLHGPELIDHYEELIKAVPQS	ORF_OK	TRUE_HIT	mmkgwikcglagavvllasfwggsvraagislkqvsgpvyvvednyyvkensmvyfgakgvtvvgatwtpdtarelhklikrvsskpvlevintnyhtdraggnaywksigakvvatrqtrdlmksdwaeivaftrkglpeypdlplvlpnvvhdgdftlqegkvralyagpahtpdgifvyfpdeqvlygncilkeklgnlsfadvkaypktlerlkalklpiktvigghdsplhgpelidhyealikaaaks	MMKGWIKCGLAGAVVLMASFWGGSVRAAGISLKQVSGPVYVVEDNYYVKENSMVYFGAKGVTVVGATWTPDTARELHKLIKRVSSKPVLEVINTNYHTDRAGGNAYWKSIGAKVVATRQTRDLMKSDWAEIVAFTRKGLPEYPDLPLVLPNVVHDGDFTLQEGKVRAFYAGPAHTPDGIFVYFPDEQVLYGNCILKEKLGNLSFANVKAYPQTIERLKAMKLPIKTVIGGHDSPLHGPELIDHYEELIKAVPQS	1	254	99.6063	0	0	0	253	Cluster_4	ChpA_family_subclass_B2_metallo-beta-lactamase_ImiS_NG_050415.1_cds_WP_063865298.1_1	Cluster_4	SP_Sec_SPI_	26-27	SP_Sec_SPI_	26-27	N_Y_H_T_D	C	H	.	.
B2_1177	GCF_001446835.1	654	654	Aeromonas_veronii	Bacteria-Pseudomonadota-Gammaproteobacteria-Aeromonadales-Aeromonadaceae-Aeromonas-	4680965	NZ_LKKF01000035.1	class_B2	544.8	-	12903	13662	12901	13665	ATGATGAAAGGTTGGATAAAGTGCGGGTTGGCCGGGGCCGTGGTGCTGATGGCGAGTTTCTGGGGTGGCAGCGTGCGGGCGGCGGGGATCTCCCTCAAGCAGGTGAGCGGCCCTGTCTATGTGGTGGAGGATAACTACTACGTCAAAGAGAACTCCATGGTCTATTTCGGGGCCAAGGGGGTGACGGTGGTAGGGGCGACCTGGACGCCGGATACCGCCCGCGAGCTGCACAAGCTCATTAAACGGGTCAGCAGCAAGCCGGTGCTGGAGGTGATCAACACCAACTACCACACCGATCGGGCGGGCGGTAACGCCTACTGGAAGTCCATCGGGGCCAAGGTGGTGGCGACCCGTCAGACCCGGGATCTGATGAAGAGCGACTGGGCCGAGATTGTTGCC…	WP_081042837.1	CphA_family_subclass_B2_metallo-beta-lactamase	MMKGWIKCGLAGAVVLMASFWGGSVRAAGISLKQVSGPVYVVEDNYYVKENSMVYFGAKGVTVVGATWTPDTARELHKLIKRVSSKPVLEVINTNYHTDRAGGNAYWKSIGAKVVATRQTRDLMKSDWAEIVAFTRKGLPEYPDLPLVLPNVVHDGDFTLQEGKVRAFYAGPAHTPDGIFVYFPDEQVLYGNCILKEKLGNLSFANVKAYPQTIERLKAMKLPIKTVIGGHDSPLHGPELIDHYEELIKAVPQS	ORF_OK	TRUE_HIT	mmkgwikcglagavvllasfwggsvraagislkqvsgpvyvvednyyvkensmvyfgakgvtvvgatwtpdtarelhklikrvsskpvlevintnyhtdraggnaywksigakvvatrqtrdlmksdwaeivaftrkglpeypdlplvlpnvvhdgdftlqegkvralyagpahtpdgifvyfpdeqvlygncilkeklgnlsfadvkaypktlerlkalklpiktvigghdsplhgpelidhyealikaaaks	MMKGWIKCGLAGAVVLMASFWGGSVRAAGISLKQVSGPVYVVEDNYYVKENSMVYFGAKGVTVVGATWTPDTARELHKLIKRVSSKPVLEVINTNYHTDRAGGNAYWKSIGAKVVATRQTRDLMKSDWAEIVAFTRKGLPEYPDLPLVLPNVVHDGDFTLQEGKVRAFYAGPAHTPDGIFVYFPDEQVLYGNCILKEKLGNLSFANVKAYPQTIERLKAMKLPIKTVIGGHDSPLHGPELIDHYEELIKAVPQS	1	254	99.6063	0	0	0	254	Cluster_4	ChpA_family_subclass_B2_metallo-beta-lactamase_ImiS_NG_050415.1_cds_WP_063865298.1_1	Cluster_4	SP_Sec_SPI_	27-28	SP_Sec_SPI_	27-28	N_Y_H_T_D	C	H	.	.
B2_1178	GCF_001446855.1	654	654	Aeromonas_veronii	Bacteria-Pseudomonadota-Gammaproteobacteria-Aeromonadales-Aeromonadaceae-Aeromonas-	4680950	NZ_LKKG01000013.1	class_B2	544.9	-	12903	13662	12901	13665	ATGATGAAAGGTTGGATAAAGTGCGGGTTGGCCGGGGCCGTGGTGCTGATGGCGAGTTTCTGGGGTGGCAGCGTGCGGGCGGCGGGGATCTCCCTCAAGCAGGTGAGCGGCCCTGTCTATGTGGTGGAGGATAACTACTACGTCAAAGAGAACTCCATGGTCTATTTCGGGGCCAAGGGGGTGACGGTGGTAGGGGCGACCTGGACGCCGGATACCGCCCGCGAGCTGCACAAGCTCATTAAACGGGTCAGCAGCAAGCCGGTGCTGGAGGTGATCAACACCAACTACCACACCGATCGGGCGGGCGGTAACGCCTACTGGAAGTCCATCGGGGCCAAGGTGGTGGCGACCCGTCAGACCCGGGATCTGATGAAGAGCGACTGGGCCGAGATTGTTGCC…	WP_081042837.1	CphA_family_subclass_B2_metallo-beta-lactamase	MMKGWIKCGLAGAVVLMASFWGGSVRAAGISLKQVSGPVYVVEDNYYVKENSMVYFGAKGVTVVGATWTPDTARELHKLIKRVSSKPVLEVINTNYHTDRAGGNAYWKSIGAKVVATRQTRDLMKSDWAEIVAFTRKGLPEYPDLPLVLPNVVHDGDFTLQEGKVRAFYAGPAHTPDGIFVYFPDEQVLYGNCILKEKLGNLSFANVKAYPQTIERLKAMKLPIKTVIGGHDSPLHGPELIDHYEELIKAVPQS	ORF_OK	TRUE_HIT	mmkgwikcglagavvllasfwggsvraagislkqvsgpvyvvednyyvkensmvyfgakgvtvvgatwtpdtarelhklikrvsskpvlevintnyhtdraggnaywksigakvvatrqtrdlmksdwaeivaftrkglpeypdlplvlpnvvhdgdftlqegkvralyagpahtpdgifvyfpdeqvlygncilkeklgnlsfadvkaypktlerlkalklpiktvigghdsplhgpelidhyealikaaaks	MMKGWIKCGLAGAVVLMASFWGGSVRAAGISLKQVSGPVYVVEDNYYVKENSMVYFGAKGVTVVGATWTPDTARELHKLIKRVSSKPVLEVINTNYHTDRAGGNAYWKSIGAKVVATRQTRDLMKSDWAEIVAFTRKGLPEYPDLPLVLPNVVHDGDFTLQEGKVRAFYAGPAHTPDGIFVYFPDEQVLYGNCILKEKLGNLSFANVKAYPQTIERLKAMKLPIKTVIGGHDSPLHGPELIDHYEELIKAVPQS	1	254	99.6063	0	0	0	254	Cluster_4	ChpA_family_subclass_B2_metallo-beta-lactamase_ImiS_NG_050415.1_cds_WP_063865298.1_1	Cluster_4	SP_Sec_SPI_	27-28	SP_Sec_SPI_	27-28	N_Y_H_T_D	C	H	.	.
B2_1179	GCF_001446875.1	654	654	Aeromonas_veronii	Bacteria-Pseudomonadota-Gammaproteobacteria-Aeromonadales-Aeromonadaceae-Aeromonas-	4678292	NZ_LKKH01000006.1	class_B2	544.9	+	277844	278603	277842	278606	ATGATGAAAGGTTGGATAAAGTGCGGGTTGGCCGGGGCCGTGGTGCTGATGGCGAGTTTCTGGGGTGGCAGCGTGCGGGCGGCGGGGATCTCCCTCAAGCAGGTGAGCGGCCCTGTCTATGTGGTGGAGGATAACTACTACGTCAAAGAGAACTCCATGGTCTATTTCGGGGCCAAGGGGGTGACGGTGGTAGGGGCGACCTGGACGCCGGATACCGCCCGCGAGCTGCACAAGCTCATTAAACGGGTCAGCAGCAAGCCGGTGCTGGAGGTGATCAACACCAACTACCACACCGATCGGGCGGGCGGTAACGCCTACTGGAAGTCCATCGGGGCCAAGGTGGTGGCGACCCGTCAGACCCGGGATCTGATGAAGAGCGACTGGGCCGAGATTGTTGCC…	WP_081042837.1	CphA_family_subclass_B2_metallo-beta-lactamase	MMKGWIKCGLAGAVVLMASFWGGSVRAAGISLKQVSGPVYVVEDNYYVKENSMVYFGAKGVTVVGATWTPDTARELHKLIKRVSSKPVLEVINTNYHTDRAGGNAYWKSIGAKVVATRQTRDLMKSDWAEIVAFTRKGLPEYPDLPLVLPNVVHDGDFTLQEGKVRAFYAGPAHTPDGIFVYFPDEQVLYGNCILKEKLGNLSFANVKAYPQTIERLKAMKLPIKTVIGGHDSPLHGPELIDHYEELIKAVPQS	ORF_OK	TRUE_HIT	mmkgwikcglagavvllasfwggsvraagislkqvsgpvyvvednyyvkensmvyfgakgvtvvgatwtpdtarelhklikrvsskpvlevintnyhtdraggnaywksigakvvatrqtrdlmksdwaeivaftrkglpeypdlplvlpnvvhdgdftlqegkvralyagpahtpdgifvyfpdeqvlygncilkeklgnlsfadvkaypktlerlkalklpiktvigghdsplhgpelidhyealikaaaks	MMKGWIKCGLAGAVVLMASFWGGSVRAAGISLKQVSGPVYVVEDNYYVKENSMVYFGAKGVTVVGATWTPDTARELHKLIKRVSSKPVLEVINTNYHTDRAGGNAYWKSIGAKVVATRQTRDLMKSDWAEIVAFTRKGLPEYPDLPLVLPNVVHDGDFTLQEGKVRAFYAGPAHTPDGIFVYFPDEQVLYGNCILKEKLGNLSFANVKAYPQTIERLKAMKLPIKTVIGGHDSPLHGPELIDHYEELIKAVPQS	1	254	99.6063	0	0	0	254	Cluster_4	ChpA_family_subclass_B2_metallo-beta-lactamase_ImiS_NG_050415.1_cds_WP_063865298.1_1	Cluster_4	SP_Sec_SPI_	27-28	SP_Sec_SPI_	27-28	N_Y_H_T_D	C	H	.	.
B2_118	GCF_008370735.1	29491	645	Aeromonas_salmonicida_subsp_salmonicida	Bacteria-Pseudomonadota-Gammaproteobacteria-Aeromonadales-Aeromonadaceae-Aeromonas-	5008222	NZ_CP038102.1	class_B2	535.3	+	716049	716805	716050	716811	ATGAAAGGTTGGATAAAGTGCGGGCTGGCCGGAGCTGTGGTGCTGGTGGCGAGTTTCTGGGGCGGCAGCGTGCATGCGGCGGCGATCTCCCTCACTCAGGTAAGCGGCCCTGTCTATGTGGTGGAGGATAACTACTACGTCAAAGAGAACTCCATGGTTTATTTCGGAGCCAAGGGAGTGACGATAGTGGGGGCGACCTGGACGCCGGATACCGCCCGCGAGCTGCACAAGCTGATCAAACGGGTCAGCAACAAGCCTGTGCTGGAGGTGATCAACACCAACTACCACACGGACAGGGCAGGGGGTAACGCCTACTGGAAGTCCATCGGTGCCAAGGTGGTCTCGACCCGCCAGACCCGGGATCTGATGAAGAGCGACTGGGCCGAGATCGTCGCCTTT…	WP_005320513.1	CphA_family_subclass_B2_metallo-beta-lactamase	MKGWIKCGLAGAVVLVASFWGGSVHAAAISLTQVSGPVYVVEDNYYVKENSMVYFGAKGVTIVGATWTPDTARELHKLIKRVSNKPVLEVINTNYHTDRAGGNAYWKSIGAKVVSTRQTRDLMKSDWAEIVAFTRKGLPEYPDLPLVLPNVVHDGDFNLQEGKVRAFYAGPAHTPDGIFVYFPDQQVLYGNCILKEKLGNLSFADVKAYPQTLERLKAMKLPIKIVVGGHDSPLHGPELIDHYQALIKAAPQA	ORF_OK	TRUE_HIT	mmkgwikcglagavvllasfwggsvraagislkqvsgpvyvvednyyvkensmvyfgakgvtvvgatwtpdtarelhklikrvsskpvlevintnyhtdraggnaywksigakvvatrqtrdlmksdwaeivaftrkglpeypdlplvlpnvvhdgdftlqegkvralyagpahtpdgifvyfpdeqvlygncilkeklgnlsfadvkaypktlerlkalklpiktvigghdsplhgpelidhyealikaaak	MMKGWIKCGLAGAVVLVASFWGGSVHAAAISLTQVSGPVYVVEDNYYVKENSMVYFGAKGVTIVGATWTPDTARELHKLIKRVSNKPVLEVINTNYHTDRAGGNAYWKSIGAKVVSTRQTRDLMKSDWAEIVAFTRKGLPEYPDLPLVLPNVVHDGDFNLQEGKVRAFYAGPAHTPDGIFVYFPDQQVLYGNCILKEKLGNLSFADVKAYPQTLERLKAMKLPIKIVVGGHDSPLHGPELIDHYQALIKAAPQ	1	253	99.2126	0	0	0	253	Cluster_4	ChpA_family_subclass_B2_metallo-beta-lactamase_ImiS_NG_050415.1_cds_WP_063865298.1_1	Cluster_4	SP_Sec_SPI_	26-27	SP_Sec_SPI_	26-27	N_Y_H_T_D	C	H	.	.
B2_1180	GCF_001446895.1	656	656	Aeromonas_allosaccharophila	Bacteria-Pseudomonadota-Gammaproteobacteria-Aeromonadales-Aeromonadaceae-Aeromonas-	4584465	NZ_LKKI01000021.1	class_B2	544.6	-	12970	13729	12968	13717	ATGAAGTGCACATTGGCCGGGGCCATGGTGCTGATGGCGAGTTTCTGGGGTGGCAGCGTGCGGGCAGCGGGGATCGAGCTCAAGCAGGTAAGCGGCCCTGTCTATGTTGTTGAAGACAACTACTACGTCAAAGAGAACTCCATGGTCTATTTCGGGGCCAAGGGGGTGACGGTGGTGGGGGCGACCTGGACGCCGGATACCGCCCGCGAGCTGCACAAGCTCATTAAACGGGTCAGCAGCAAGCCGGTGCTGGAGGTGATCAACACCAACTACCACACCGATCGGGCGGGTGGTAACGCCTACTGGAAGTCCATCGGGGCCAAGGTGGTGGCGACGCGCCAGACCCGGGATCTGATGAAGAGCGACTGGGCCGAGATTGTCGCCTTTACCCGCAAGGGG…	WP_239693521.1	CphA_family_subclass_B2_metallo-beta-lactamase	MKCTLAGAMVLMASFWGGSVRAAGIELKQVSGPVYVVEDNYYVKENSMVYFGAKGVTVVGATWTPDTARELHKLIKRVSSKPVLEVINTNYHTDRAGGNAYWKSIGAKVVATRQTRDLMKSDWAEIVAFTRKGLPEYPDLPLVLPNVVHDGDFTLQEGKLRAFYAGPAHTPDGIFVYFPDEQVLYGNCILKEKLGNLSFANVKAYPQTIERLKAMKLPIKTVIGGHDSPLHGPELIDHYEELIKAVPQS	ORF_OK	TRUE_HIT	mmkgwikcglagavvllasfwggsvraagislkqvsgpvyvvednyyvkensmvyfgakgvtvvgatwtpdtarelhklikrvsskpvlevintnyhtdraggnaywksigakvvatrqtrdlmksdwaeivaftrkglpeypdlplvlpnvvhdgdftlqegkvralyagpahtpdgifvyfpdeqvlygncilkeklgnlsfadvkaypktlerlkalklpiktvigghdsplhgpelidhyealikaaaks	MMKGWMKCTLAGAMVLMASFWGGSVRAAGIELKQVSGPVYVVEDNYYVKENSMVYFGAKGVTVVGATWTPDTARELHKLIKRVSSKPVLEVINTNYHTDRAGGNAYWKSIGAKVVATRQTRDLMKSDWAEIVAFTRKGLPEYPDLPLVLPNVVHDGDFTLQEGKLRAFYAGPAHTPDGIFVYFPDEQVLYGNCILKEKLGNLSFANVKAYPQTIERLKAMKLPIKTVIGGHDSPLHGPELIDHYEELIKAVPQS	1	254	99.6063	0	0	0	249	Cluster_4	ChpA_family_subclass_B2_metallo-beta-lactamase_ImiS_NG_050415.1_cds_WP_063865298.1_1	Cluster_4	SP_Sec_SPI_	22-23	SP_Sec_SPI_	22-23	N_Y_H_T_D	C	H	.	.
B2_1181	GCF_001455365.1	644	644	Aeromonas_hydrophila	Bacteria-Pseudomonadota-Gammaproteobacteria-Aeromonadales-Aeromonadaceae-Aeromonas-	5145887	NZ_CP013178.1	class_B2	540.9	-	4362551	4363310	4362549	4363313	ATGATGAAAGGTTGGATGAAGTGCGGGTTGGCCGGGGCCGTGGTGCTGATGGCGAGTTTCTGGGGTGGCAGCGTGCGGGCGGCAGGGATCTCCCTCAAGCAGGTGAGCGGCCCGGTCTATGTGGTGGAGGACAACTACTACGTCAAAGAGAACTCCATGGTCTATTTCGGGGCCAAGGGGGTGACTGTGGTGGGGGCGACCTGGACGCCGGATACCGCCCGCGAGCTGCACAAGCTGATCAAACGGGTCAGCAGCAAGCCGGTGCTGGAGGTGATCAACACCAACTACCACACCGACCGGGCGGGCGGTAACGCCTACTGGAAGTCCATCGGGGCCAAGGTGGTGGCGACACGCCAGACCCGGGATCTGATGAAGAGCGACTGGGCCGAGATTGTCGCC…	WP_080644389.1	CphA_family_subclass_B2_metallo-beta-lactamase	MMKGWMKCGLAGAVVLMASFWGGSVRAAGISLKQVSGPVYVVEDNYYVKENSMVYFGAKGVTVVGATWTPDTARELHKLIKRVSSKPVLEVINTNYHTDRAGGNAYWKSIGAKVVATRQTRDLMKSDWAEIVAFTRKGLPEYPDLPLVLPNVVHDGDFTLQEGKVRAFYAGPAHTPDGIFVYFPDEQVLYGNCILKEKLGNLSFANVKAYPQTIERLKAMKLPIKTVIGGHDSPLHGPELIDHYEELIKAVPQS	ORF_OK	TRUE_HIT	mmkgwikcglagavvllasfwggsvraagislkqvsgpvyvvednyyvkensmvyfgakgvtvvgatwtpdtarelhklikrvsskpvlevintnyhtdraggnaywksigakvvatrqtrdlmksdwaeivaftrkglpeypdlplvlpnvvhdgdftlqegkvralyagpahtpdgifvyfpdeqvlygncilkeklgnlsfadvkaypktlerlkalklpiktvigghdsplhgpelidhyealikaaaks	MMKGWMKCGLAGAVVLMASFWGGSVRAAGISLKQVSGPVYVVEDNYYVKENSMVYFGAKGVTVVGATWTPDTARELHKLIKRVSSKPVLEVINTNYHTDRAGGNAYWKSIGAKVVATRQTRDLMKSDWAEIVAFTRKGLPEYPDLPLVLPNVVHDGDFTLQEGKVRAFYAGPAHTPDGIFVYFPDEQVLYGNCILKEKLGNLSFANVKAYPQTIERLKAMKLPIKTVIGGHDSPLHGPELIDHYEELIKAVPQS	1	254	99.6063	0	0	0	254	Cluster_4	ChpA_family_subclass_B2_metallo-beta-lactamase_ImiS_NG_050415.1_cds_WP_063865298.1_1	Cluster_4	SP_Sec_SPI_	27-28	SP_Sec_SPI_	27-28	N_Y_H_T_D	C	H	.	.
B2_1182	GCF_001466435.1	645	645	Aeromonas_salmonicida	Bacteria-Pseudomonadota-Gammaproteobacteria-Aeromonadales-Aeromonadaceae-Aeromonas-	4554843	NZ_JZTG01000013.1	class_B2	541.2	-	11273	12029	11268	12029	ATGAAAGGTTGGATAAAGTGCGGGCTGGCCGGGGCAGTGGTGCTGGTGGCGAGTTTCTGGGGCGGCAGCGTGCATGCGGCGGCGATCTCCCTCACTCAGGTGAGCGGCCCCGTGTATGTCGTAGAAGATAACTACTACGTCAAAGAGAACTCCATGGTCTATTTCGGGGCCAAGGGGGTGACTGTGGTGGGGGCGACCTGGACGCCGGATACCGCCCGCGAGCTGCACAAGCTGATCAAACGGGTCAGCAACAAGCCTGTGCTGGAGGTGATCAACACCAACTACCACACGGACAGGGCAGGGGGTAACGCCTACTGGAAGTCCATCGGTGCCAAGGTGGTATCGACCCGCCAGACCCGGGATCTGATGAAGAGCGACTGGGCCGAGATCGTCGCCTTT…	WP_058395305.1	CphA_family_subclass_B2_metallo-beta-lactamase	MKGWIKCGLAGAVVLVASFWGGSVHAAAISLTQVSGPVYVVEDNYYVKENSMVYFGAKGVTVVGATWTPDTARELHKLIKRVSNKPVLEVINTNYHTDRAGGNAYWKSIGAKVVSTRQTRDLMKSDWAEIVAFTRKGLPEYPDLPLVLPNVVHDGDFTLQEGKVRAFYAGPAHTPDGIFVYFPDQQVLYGNCILKEKLGNLSFADVKAYPQTLERLKAMKLPIKIVVGGHDSPLHGPELIDHYEALIKAAPQA	ORF_OK	TRUE_HIT	mmkgwikcglagavvllasfwggsvraagislkqvsgpvyvvednyyvkensmvyfgakgvtvvgatwtpdtarelhklikrvsskpvlevintnyhtdraggnaywksigakvvatrqtrdlmksdwaeivaftrkglpeypdlplvlpnvvhdgdftlqegkvralyagpahtpdgifvyfpdeqvlygncilkeklgnlsfadvkaypktlerlkalklpiktvigghdsplhgpelidhyealikaaak	MMKGWIKCGLAGAVVLVASFWGGSVHAAAISLTQVSGPVYVVEDNYYVKENSMVYFGAKGVTVVGATWTPDTARELHKLIKRVSNKPVLEVINTNYHTDRAGGNAYWKSIGAKVVSTRQTRDLMKSDWAEIVAFTRKGLPEYPDLPLVLPNVVHDGDFTLQEGKVRAFYAGPAHTPDGIFVYFPDQQVLYGNCILKEKLGNLSFADVKAYPQTLERLKAMKLPIKIVVGGHDSPLHGPELIDHYEALIKAAPQ	1	253	99.2126	0	0	0	253	Cluster_4	ChpA_family_subclass_B2_metallo-beta-lactamase_ImiS_NG_050415.1_cds_WP_063865298.1_1	Cluster_4	SP_Sec_SPI_	26-27	SP_Sec_SPI_	26-27	N_Y_H_T_D	C	H	.	.
B2_1183	GCF_001481535.2	645	645	Aeromonas_salmonicida	Bacteria-Pseudomonadota-Gammaproteobacteria-Aeromonadales-Aeromonadaceae-Aeromonas-	4710230	NZ_JZTF01000027.1	class_B2	532.9	-	11227	11983	11222	11986	ATGATGAAAGGTTGGATCAAATGCGGGTTGGCCGGGGCCCTGGTGCTGGTGGCGAGTATCTGGGGCGGCAGCGTGCATGCGGCGGCGATCTCCCTCACTCAGGTGAGCGGCCCCGTGTATGTCGTAGAGGATAACTACTACGTCAAAGAGAACTCCATGGTCTATTTCGGGGCCAAGGGAGTGACGGTAGTGGGGGCGACCTGGACGCCGGATACCGCCCGAGAGCTGCACAAGCTGATCAAGCGGGTCAGCAACAAGCCAGTGCTGGAGGTGATCAACACCAACTACCACACGGACAGGGCAGGGGGTAACGCCTACTGGAAGTCCATCGGTGCCAAGGTGGTGTCGACCCGCCAGACCCGGGATCTGATGAAGAGCGACTGGGCCGAGATCGTCGCC…	WP_081100768.1	CphA_family_subclass_B2_metallo-beta-lactamase	MMKGWIKCGLAGALVLVASIWGGSVHAAAISLTQVSGPVYVVEDNYYVKENSMVYFGAKGVTVVGATWTPDTARELHKLIKRVSNKPVLEVINTNYHTDRAGGNAYWKSIGAKVVSTRQTRDLMKSDWAEIVAFTRKGLPEYPDLPLVLPNVVHDGDFTLQEGKVHAFYTGPAHTPDGIFVYFPDQQVLYGNCILKEKLGNLSFADVKAYPQTLERLKAMKLPIKIVVGGHDSPLHGPELIDHYQSLIKAAPQA	ORF_OK	TRUE_HIT	mmkgwikcglagavvllasfwggsvraagislkqvsgpvyvvednyyvkensmvyfgakgvtvvgatwtpdtarelhklikrvsskpvlevintnyhtdraggnaywksigakvvatrqtrdlmksdwaeivaftrkglpeypdlplvlpnvvhdgdftlqegkvralyagpahtpdgifvyfpdeqvlygncilkeklgnlsfadvkaypktlerlkalklpiktvigghdsplhgpelidhyealikaaak	MMKGWIKCGLAGALVLVASIWGGSVHAAAISLTQVSGPVYVVEDNYYVKENSMVYFGAKGVTVVGATWTPDTARELHKLIKRVSNKPVLEVINTNYHTDRAGGNAYWKSIGAKVVSTRQTRDLMKSDWAEIVAFTRKGLPEYPDLPLVLPNVVHDGDFTLQEGKVHAFYTGPAHTPDGIFVYFPDQQVLYGNCILKEKLGNLSFADVKAYPQTLERLKAMKLPIKIVVGGHDSPLHGPELIDHYQSLIKAAPQ	1	253	99.2126	0	0	0	254	Cluster_4	ChpA_family_subclass_B2_metallo-beta-lactamase_ImiS_NG_050415.1_cds_WP_063865298.1_1	Cluster_4	SP_Sec_SPI_	27-28	SP_Sec_SPI_	27-28	N_Y_H_T_D	C	H	.	.
B2_1184	GCF_001481545.2	645	645	Aeromonas_salmonicida	Bacteria-Pseudomonadota-Gammaproteobacteria-Aeromonadales-Aeromonadaceae-Aeromonas-	4736406	NZ_JZTH01000011.1	class_B2	537.8	-	11362	12115	11357	12118	ATGAAAGGTTGGATAAAGTGCGGGCTGGCCGGAGCCCTGGTGCTGATGGCGAGTTTCTGGGGCGGCAGCGTGCATGCGGCGGCGATATCGCTTACTCAGGTGAGCGGCCCCGTGTATGTCGTAGAAGATAACTACTACGTCAAAGAGAACTCCATGGTCTATTTCGGGGCCAAGGGAGTGACGGTAGTGGGGGCGACCTGGACGCCGGATACCGCCCGAGAGCTGCACAAGCTGATCAAGCGGGTCAGCAACAAGCCAGTGCTGGAGGTGATCAACACCAACTACCACACGGACAGGGCAGGGGGTAACGCCTACTGGAAGTCCATCGGTGCCAAGGTGGTATCGACCCGCCAGACCCGGGATCTGATGAAGAGCGACTGGGCCGAGATTGTTGCCTTT…	WP_059112452.1	CphA_family_subclass_B2_metallo-beta-lactamase	MKGWIKCGLAGALVLMASFWGGSVHAAAISLTQVSGPVYVVEDNYYVKENSMVYFGAKGVTVVGATWTPDTARELHKLIKRVSNKPVLEVINTNYHTDRAGGNAYWKSIGAKVVSTRQTRDLMKSDWAEIVAFTRKGLPEYPDLPLVLPNVVHDGDFTLQEGKLRAFYAGPAHTPDGIFVYFPDQQVLYGNCILKEKLGNLSFADVKAYPQTLERLKAMKLPIKIVVGGHDSPLHGPELIDHYQALIKAAPQA	ORF_OK	TRUE_HIT	mkgwikcglagavvllasfwggsvraagislkqvsgpvyvvednyyvkensmvyfgakgvtvvgatwtpdtarelhklikrvsskpvlevintnyhtdraggnaywksigakvvatrqtrdlmksdwaeivaftrkglpeypdlplvlpnvvhdgdftlqegkvralyagpahtpdgifvyfpdeqvlygncilkeklgnlsfadvkaypktlerlkalklpiktvigghdsplhgpelidhyealikaaak	MKGWIKCGLAGALVLMASFWGGSVHAAAISLTQVSGPVYVVEDNYYVKENSMVYFGAKGVTVVGATWTPDTARELHKLIKRVSNKPVLEVINTNYHTDRAGGNAYWKSIGAKVVSTRQTRDLMKSDWAEIVAFTRKGLPEYPDLPLVLPNVVHDGDFTLQEGKLRAFYAGPAHTPDGIFVYFPDQQVLYGNCILKEKLGNLSFADVKAYPQTLERLKAMKLPIKIVVGGHDSPLHGPELIDHYQALIKAAPQ	2	253	98.8189	0	0	0	253	Cluster_4	ChpA_family_subclass_B2_metallo-beta-lactamase_ImiS_NG_050415.1_cds_WP_063865298.1_1	Cluster_4	SP_Sec_SPI_	26-27	SP_Sec_SPI_	26-27	N_Y_H_T_D	C	H	.	.
B2_1185	GCF_001499805.2	29491	645	Aeromonas_salmonicida_subsp_salmonicida	Bacteria-Pseudomonadota-Gammaproteobacteria-Aeromonadales-Aeromonadaceae-Aeromonas-	4889514	NZ_JYFF01000024.1	class_B2	541.4	+	58048	58804	58049	58810	ATGAAAGGTTGGATAAAGTGCGGGCTGGCCGGAGCTGTGGTGCTGGTGGCGAGTTTCTGGGGCGGCAGCGTGCATGCGGCGGCGATCTCCCTCACTCAGGTAAGCGGCCCTGTCTATGTGGTGGAGGATAACTACTACGTCAAAGAGAACTCCATGGTTTATTTCGGAGCCAAGGGAGTGACGATAGTGGGGGCGACCTGGACGCCGGATACCGCCCGCGAGCTGCACAAGCTGATCAAACGGGTCAGCAACAAGCCTGTGCTGGAGGTGATCAACACCAACTACCACACGGACAGGGCAGGGGGTAACGCCTACTGGAAGTCCATCGGTGCCAAGGTGGTCTCGACCCGCCAGACCCGGGATCTGATGAAGAGCGACTGGGCCGAGATCGTCGCCTTT…	WP_005320513.1	CphA_family_subclass_B2_metallo-beta-lactamase	MKGWIKCGLAGAVVLVASFWGGSVHAAAISLTQVSGPVYVVEDNYYVKENSMVYFGAKGVTIVGATWTPDTARELHKLIKRVSNKPVLEVINTNYHTDRAGGNAYWKSIGAKVVSTRQTRDLMKSDWAEIVAFTRKGLPEYPDLPLVLPNVVHDGDFNLQEGKVRAFYAGPAHTPDGIFVYFPDQQVLYGNCILKEKLGNLSFADVKAYPQTLERLKAMKLPIKIVVGGHDSPLHGPELIDHYQALIKAAPQA	ORF_OK	TRUE_HIT	mmkgwikcglagavvllasfwggsvraagislkqvsgpvyvvednyyvkensmvyfgakgvtvvgatwtpdtarelhklikrvsskpvlevintnyhtdraggnaywksigakvvatrqtrdlmksdwaeivaftrkglpeypdlplvlpnvvhdgdftlqegkvralyagpahtpdgifvyfpdeqvlygncilkeklgnlsfadvkaypktlerlkalklpiktvigghdsplhgpelidhyealikaaak	MMKGWIKCGLAGAVVLVASFWGGSVHAAAISLTQVSGPVYVVEDNYYVKENSMVYFGAKGVTIVGATWTPDTARELHKLIKRVSNKPVLEVINTNYHTDRAGGNAYWKSIGAKVVSTRQTRDLMKSDWAEIVAFTRKGLPEYPDLPLVLPNVVHDGDFNLQEGKVRAFYAGPAHTPDGIFVYFPDQQVLYGNCILKEKLGNLSFADVKAYPQTLERLKAMKLPIKIVVGGHDSPLHGPELIDHYQALIKAAPQ	1	253	99.2126	0	0	0	253	Cluster_4	ChpA_family_subclass_B2_metallo-beta-lactamase_ImiS_NG_050415.1_cds_WP_063865298.1_1	Cluster_4	SP_Sec_SPI_	26-27	SP_Sec_SPI_	26-27	N_Y_H_T_D	C	H	.	.
B2_1186	GCF_001518775.1	644	644	Aeromonas_hydrophila	Bacteria-Pseudomonadota-Gammaproteobacteria-Aeromonadales-Aeromonadaceae-Aeromonas-	5275132	NZ_CP013965.1	class_B2	540.8	-	4324252	4325011	4324250	4325014	ATGATGAAAGGTTGGATGAAGTGCGGGTTGGCCGGGGCCGTGGTGCTGATGGCGAGTTTCTGGGGTGGCAGCGTGCGGGCGGCAGGGATCTCCCTCAAGCAGGTGAGCGGCCCGGTCTATGTGGTGGAGGACAACTACTACGTCAAAGAGAACTCCATGGTCTATTTCGGGGCCAAGGGGGTGACTGTGGTGGGGGCGACCTGGACGCCGGATACCGCCCGCGAGCTGCACAAGCTGATCAAACGGGTCAGCAGCAAGCCGGTGCTGGAGGTGATCAACACCAACTACCACACCGACCGGGCGGGCGGTAACGCCTACTGGAAGTCCATCGGGGCCAAGGTGGTGGCGACACGCCAGACCCGGGATCTGATGAAGAGCGACTGGGCCGAGATTGTCGCC…	WP_080644389.1	CphA_family_subclass_B2_metallo-beta-lactamase	MMKGWMKCGLAGAVVLMASFWGGSVRAAGISLKQVSGPVYVVEDNYYVKENSMVYFGAKGVTVVGATWTPDTARELHKLIKRVSSKPVLEVINTNYHTDRAGGNAYWKSIGAKVVATRQTRDLMKSDWAEIVAFTRKGLPEYPDLPLVLPNVVHDGDFTLQEGKVRAFYAGPAHTPDGIFVYFPDEQVLYGNCILKEKLGNLSFANVKAYPQTIERLKAMKLPIKTVIGGHDSPLHGPELIDHYEELIKAVPQS	ORF_OK	TRUE_HIT	mmkgwikcglagavvllasfwggsvraagislkqvsgpvyvvednyyvkensmvyfgakgvtvvgatwtpdtarelhklikrvsskpvlevintnyhtdraggnaywksigakvvatrqtrdlmksdwaeivaftrkglpeypdlplvlpnvvhdgdftlqegkvralyagpahtpdgifvyfpdeqvlygncilkeklgnlsfadvkaypktlerlkalklpiktvigghdsplhgpelidhyealikaaaks	MMKGWMKCGLAGAVVLMASFWGGSVRAAGISLKQVSGPVYVVEDNYYVKENSMVYFGAKGVTVVGATWTPDTARELHKLIKRVSSKPVLEVINTNYHTDRAGGNAYWKSIGAKVVATRQTRDLMKSDWAEIVAFTRKGLPEYPDLPLVLPNVVHDGDFTLQEGKVRAFYAGPAHTPDGIFVYFPDEQVLYGNCILKEKLGNLSFANVKAYPQTIERLKAMKLPIKTVIGGHDSPLHGPELIDHYEELIKAVPQS	1	254	99.6063	0	0	0	254	Cluster_4	ChpA_family_subclass_B2_metallo-beta-lactamase_ImiS_NG_050415.1_cds_WP_063865298.1_1	Cluster_4	SP_Sec_SPI_	27-28	SP_Sec_SPI_	27-28	N_Y_H_T_D	C	H	.	.
B2_1187	GCF_001535585.1	644	644	Aeromonas_hydrophila	Bacteria-Pseudomonadota-Gammaproteobacteria-Aeromonadales-Aeromonadaceae-Aeromonas-	5087310	NZ_LNUR01000010.1	class_B2	541.9	-	10438	11197	10436	11200	ATGATGAAAGGTTGGATGAAGTGCGGGTTGGCCGGGGCCGTGGTGCTGATGGCGAGTTTTTGGGGCGGCAGCGTGCGGGCGGCGGGGATCTCCCTCAAGCAGGTAAGCGGCCCTGTCTATGTGGTGGAGGACAACTACTACGTCAAAGAGAACTCCATGGTCTATTTCGGGGCCAAGGGGGTGACGGTGGTGGGGGCGACCTGGACGCCAGATACCGCCCGCGAGCTGCACAAGCTCATTAAACGGGTCAGCAGCAAGCCGGTGCTGGAGGTGATCAACACCAACTACCACACCGATCGGGCGGGCGGTAACGCCTACTGGAAGTCCATCGGGGCCAGGGTGGTGGCGACGCGCCAGACCCGGGATCTGATGAAGAGCGACTGGGCCGAGATTGTCGCC…	WP_081086394.1	CphA_family_subclass_B2_metallo-beta-lactamase	MMKGWMKCGLAGAVVLMASFWGGSVRAAGISLKQVSGPVYVVEDNYYVKENSMVYFGAKGVTVVGATWTPDTARELHKLIKRVSSKPVLEVINTNYHTDRAGGNAYWKSIGARVVATRQTRDLMKSDWAEIVAFTRRGLPEYPDLPLVLPNVVHDGDFKLQDGKVRAFYAGPAHTPDGIFVYFPDEQVLYGNCILKEKLGNLSFANVKEYPQTIERLKAMKLPIKTVIGGHDSPLHGPELIDHYEALIKAAPQS	ORF_OK	TRUE_HIT	mmkgwikcglagavvllasfwggsvraagislkqvsgpvyvvednyyvkensmvyfgakgvtvvgatwtpdtarelhklikrvsskpvlevintnyhtdraggnaywksigakvvatrqtrdlmksdwaeivaftrkglpeypdlplvlpnvvhdgdftlqegkvralyagpahtpdgifvyfpdeqvlygncilkeklgnlsfadvkaypktlerlkalklpiktvigghdsplhgpelidhyealikaaaks	MMKGWMKCGLAGAVVLMASFWGGSVRAAGISLKQVSGPVYVVEDNYYVKENSMVYFGAKGVTVVGATWTPDTARELHKLIKRVSSKPVLEVINTNYHTDRAGGNAYWKSIGARVVATRQTRDLMKSDWAEIVAFTRRGLPEYPDLPLVLPNVVHDGDFKLQDGKVRAFYAGPAHTPDGIFVYFPDEQVLYGNCILKEKLGNLSFANVKEYPQTIERLKAMKLPIKTVIGGHDSPLHGPELIDHYEALIKAAPQS	1	254	99.6063	0	0	0	254	Cluster_4	ChpA_family_subclass_B2_metallo-beta-lactamase_ImiS_NG_050415.1_cds_WP_063865298.1_1	Cluster_4	SP_Sec_SPI_	27-28	SP_Sec_SPI_	27-28	N_Y_H_T_D	C	H	.	.
B2_1188	GCF_001593245.1	654	654	Aeromonas_veronii	Bacteria-Pseudomonadota-Gammaproteobacteria-Aeromonadales-Aeromonadaceae-Aeromonas-	4923009	NZ_CP012504.1	class_B2	540.4	+	1091239	1091998	1091237	1092001	ATGATGAAAGGTTGGATGAAGTGCACATTGGCCGGGGCCGTGGTGCTGATGGCGAGTTTCTGGGGTGGCAGCGTGCGGGCGGCTGGGATCGAACTCAAGCAGGTGAGTGGCCCTGTCTATGTGGTGGAGGACAACTACTACGTCAAAGAGAACTCGATGGTCTATTTCGGGGCCAAGGGGGTGACGGTGGTGGGGGCGACCTGGACGCCGGATACCGCCCGCGAGCTGCACAAGCTGATCAAACGGGTCAGCAGCAAGCCGGTGCTGGAGGTGATCAACACCAACTACCACACCGACCGGGCGGGCGGTAACGCCTACTGGAAGTCCATCGGGGCCAAGGTGGTGGCGACGCGCCAGACCCGGGATCTGATGAAGAGCGACTGGGCCGAGATTGTCGCC…	WP_082182214.1	CphA_family_subclass_B2_metallo-beta-lactamase	MMKGWMKCTLAGAVVLMASFWGGSVRAAGIELKQVSGPVYVVEDNYYVKENSMVYFGAKGVTVVGATWTPDTARELHKLIKRVSSKPVLEVINTNYHTDRAGGNAYWKSIGAKVVATRQTRDLMKSDWAEIVAFTRKGLPEYPDLPLVLPNVVHDGDFTLQEGKVRAFYAGPAHTPDGIFVYFPDEQVLYGNCILKEKLGNLSFANVKAYPQTIERLKAMKLPIKTVIGGHDSPLHGPELIDHYEELIKTAPQS	ORF_OK	TRUE_HIT	mmkgwikcglagavvllasfwggsvraagislkqvsgpvyvvednyyvkensmvyfgakgvtvvgatwtpdtarelhklikrvsskpvlevintnyhtdraggnaywksigakvvatrqtrdlmksdwaeivaftrkglpeypdlplvlpnvvhdgdftlqegkvralyagpahtpdgifvyfpdeqvlygncilkeklgnlsfadvkaypktlerlkalklpiktvigghdsplhgpelidhyealikaaaks	MMKGWMKCTLAGAVVLMASFWGGSVRAAGIELKQVSGPVYVVEDNYYVKENSMVYFGAKGVTVVGATWTPDTARELHKLIKRVSSKPVLEVINTNYHTDRAGGNAYWKSIGAKVVATRQTRDLMKSDWAEIVAFTRKGLPEYPDLPLVLPNVVHDGDFTLQEGKVRAFYAGPAHTPDGIFVYFPDEQVLYGNCILKEKLGNLSFANVKAYPQTIERLKAMKLPIKTVIGGHDSPLHGPELIDHYEELIKTAPQS	1	254	99.6063	0	0	0	254	Cluster_4	ChpA_family_subclass_B2_metallo-beta-lactamase_ImiS_NG_050415.1_cds_WP_063865298.1_1	Cluster_4	SP_Sec_SPI_	27-28	SP_Sec_SPI_	27-28	N_Y_H_T_D	C	H	.	.
B2_1189	GCF_001597895.1	29491	645	Aeromonas_salmonicida_subsp_salmonicida	Bacteria-Pseudomonadota-Gammaproteobacteria-Aeromonadales-Aeromonadaceae-Aeromonas-	4730374	NZ_JYFG01000024.1	class_B2	541.4	+	58050	58806	58051	58812	ATGAAAGGTTGGATAAAGTGCGGGCTGGCCGGAGCTGTGGTGCTGGTGGCGAGTTTCTGGGGCGGCAGCGTGCATGCGGCGGCGATCTCCCTCACTCAGGTAAGCGGCCCTGTCTATGTGGTGGAGGATAACTACTACGTCAAAGAGAACTCCATGGTTTATTTCGGAGCCAAGGGAGTGACGATAGTGGGGGCGACCTGGACGCCGGATACCGCCCGCGAGCTGCACAAGCTGATCAAACGGGTCAGCAACAAGCCTGTGCTGGAGGTGATCAACACCAACTACCACACGGACAGGGCAGGGGGTAACGCCTACTGGAAGTCCATCGGTGCCAAGGTGGTCTCGACCCGCCAGACCCGGGATCTGATGAAGAGCGACTGGGCCGAGATCGTCGCCTTT…	WP_005320513.1	CphA_family_subclass_B2_metallo-beta-lactamase	MKGWIKCGLAGAVVLVASFWGGSVHAAAISLTQVSGPVYVVEDNYYVKENSMVYFGAKGVTIVGATWTPDTARELHKLIKRVSNKPVLEVINTNYHTDRAGGNAYWKSIGAKVVSTRQTRDLMKSDWAEIVAFTRKGLPEYPDLPLVLPNVVHDGDFNLQEGKVRAFYAGPAHTPDGIFVYFPDQQVLYGNCILKEKLGNLSFADVKAYPQTLERLKAMKLPIKIVVGGHDSPLHGPELIDHYQALIKAAPQA	ORF_OK	TRUE_HIT	mmkgwikcglagavvllasfwggsvraagislkqvsgpvyvvednyyvkensmvyfgakgvtvvgatwtpdtarelhklikrvsskpvlevintnyhtdraggnaywksigakvvatrqtrdlmksdwaeivaftrkglpeypdlplvlpnvvhdgdftlqegkvralyagpahtpdgifvyfpdeqvlygncilkeklgnlsfadvkaypktlerlkalklpiktvigghdsplhgpelidhyealikaaak	MMKGWIKCGLAGAVVLVASFWGGSVHAAAISLTQVSGPVYVVEDNYYVKENSMVYFGAKGVTIVGATWTPDTARELHKLIKRVSNKPVLEVINTNYHTDRAGGNAYWKSIGAKVVSTRQTRDLMKSDWAEIVAFTRKGLPEYPDLPLVLPNVVHDGDFNLQEGKVRAFYAGPAHTPDGIFVYFPDQQVLYGNCILKEKLGNLSFADVKAYPQTLERLKAMKLPIKIVVGGHDSPLHGPELIDHYQALIKAAPQ	1	253	99.2126	0	0	0	253	Cluster_4	ChpA_family_subclass_B2_metallo-beta-lactamase_ImiS_NG_050415.1_cds_WP_063865298.1_1	Cluster_4	SP_Sec_SPI_	26-27	SP_Sec_SPI_	26-27	N_Y_H_T_D	C	H	.	.
B2_119	GCF_008693705.1	654	654	Aeromonas_veronii	Bacteria-Pseudomonadota-Gammaproteobacteria-Aeromonadales-Aeromonadaceae-Aeromonas-	4561870	NZ_CP044060.1	class_B2	540.5	-	2361329	2362088	2361327	2362091	ATGATGAAAGGTTGGATGAAGTGCGGGTTGGCCGGGGCCGTGGTGCTGATGGCGAGTTTCTGGGGTGGCAGCGTGCGGGCGGCGGGGATCTCCCTTAAGCAGGTGAGCGGCCCTGTTTACGTGGTTGAAGATAACTACTACGTAAAGGAAAACTCCATGGTCTATTTCGGGGCCAAGGGGGTGACTGTGGTGGGGGCGACCTGGACGCCGGATACCGCTCGCGAGCTGCATAAGCTGATCAAACGGGTTAGCAGCAAGCCGGTGCTGGAGGTGATCAACACCAACTACCACACCGATCGGGCGGGTGGTAACGCCTACTGGAAGTCCATCGGCGCCAAGGTGGTGGCGACCCGCCAGACCCGGGATTTGATGAAGAGCGACTGGGCCGAGATTGTCGCC…	WP_150389582.1	CphA_family_subclass_B2_metallo-beta-lactamase	MMKGWMKCGLAGAVVLMASFWGGSVRAAGISLKQVSGPVYVVEDNYYVKENSMVYFGAKGVTVVGATWTPDTARELHKLIKRVSSKPVLEVINTNYHTDRAGGNAYWKSIGAKVVATRQTRDLMKSDWAEIVAFTRKGLPEYPDLPLVLPNVVHDGDFKLQEGKVRAFFAGPAHTPDGIFVYFPDEQVLYGNCILKEKLGNLSFANVKAYPQTIERLKAMKLPIKTVIGGHDSPLHGPELIDHYEELIKAAPQS	ORF_OK	TRUE_HIT	mmkgwikcglagavvllasfwggsvraagislkqvsgpvyvvednyyvkensmvyfgakgvtvvgatwtpdtarelhklikrvsskpvlevintnyhtdraggnaywksigakvvatrqtrdlmksdwaeivaftrkglpeypdlplvlpnvvhdgdftlqegkvralyagpahtpdgifvyfpdeqvlygncilkeklgnlsfadvkaypktlerlkalklpiktvigghdsplhgpelidhyealikaaaks	MMKGWMKCGLAGAVVLMASFWGGSVRAAGISLKQVSGPVYVVEDNYYVKENSMVYFGAKGVTVVGATWTPDTARELHKLIKRVSSKPVLEVINTNYHTDRAGGNAYWKSIGAKVVATRQTRDLMKSDWAEIVAFTRKGLPEYPDLPLVLPNVVHDGDFKLQEGKVRAFFAGPAHTPDGIFVYFPDEQVLYGNCILKEKLGNLSFANVKAYPQTIERLKAMKLPIKTVIGGHDSPLHGPELIDHYEELIKAAPQS	1	254	99.6063	0	0	0	254	Cluster_4	ChpA_family_subclass_B2_metallo-beta-lactamase_ImiS_NG_050415.1_cds_WP_063865298.1_1	Cluster_4	SP_Sec_SPI_	27-28	SP_Sec_SPI_	27-28	N_Y_H_T_D	C	H	.	.
B2_1190	GCF_001604835.1	644	644	Aeromonas_hydrophila	Bacteria-Pseudomonadota-Gammaproteobacteria-Aeromonadales-Aeromonadaceae-Aeromonas-	4967857	NZ_LRRV01000004.1	class_B2	545.2	-	13871	14630	13869	14633	ATGATGAAAGGTTGGATGAAGTGCGGGTTGGCCGGGGCCGTGGTGCTGATGGCGAGTTTCTGGGGTGGCAGCGTGCGGGCGGCAGGGATCTCCCTCAAGCAGGTGAGCGGCCCGGTCTATGTGGTGGAGGACAACTACTACGTCAAAGAGAACTCCATGGTCTATTTCGGGGCCAAGGGGGTGACTGTGGTGGGGGCGACCTGGACGCCGGATACCGCCCGCGAGCTGCACAAGCTGATCAAACGGGTCAGCAGCAAGCCGGTGCTGGAGGTGATCAACACCAACTACCACACCGACCGGGCGGGCGGTAACGCCTACTGGAAGTCCATCGGGGCCAAGGTGGTGGCGACACGCCAGACCCGGGATCTGATGAAGAGCGACTGGGCCGAGATTGTCGCC…	WP_080644389.1	CphA_family_subclass_B2_metallo-beta-lactamase	MMKGWMKCGLAGAVVLMASFWGGSVRAAGISLKQVSGPVYVVEDNYYVKENSMVYFGAKGVTVVGATWTPDTARELHKLIKRVSSKPVLEVINTNYHTDRAGGNAYWKSIGAKVVATRQTRDLMKSDWAEIVAFTRKGLPEYPDLPLVLPNVVHDGDFTLQEGKVRAFYAGPAHTPDGIFVYFPDEQVLYGNCILKEKLGNLSFANVKAYPQTIERLKAMKLPIKTVIGGHDSPLHGPELIDHYEELIKAVPQS	ORF_OK	TRUE_HIT	mmkgwikcglagavvllasfwggsvraagislkqvsgpvyvvednyyvkensmvyfgakgvtvvgatwtpdtarelhklikrvsskpvlevintnyhtdraggnaywksigakvvatrqtrdlmksdwaeivaftrkglpeypdlplvlpnvvhdgdftlqegkvralyagpahtpdgifvyfpdeqvlygncilkeklgnlsfadvkaypktlerlkalklpiktvigghdsplhgpelidhyealikaaaks	MMKGWMKCGLAGAVVLMASFWGGSVRAAGISLKQVSGPVYVVEDNYYVKENSMVYFGAKGVTVVGATWTPDTARELHKLIKRVSSKPVLEVINTNYHTDRAGGNAYWKSIGAKVVATRQTRDLMKSDWAEIVAFTRKGLPEYPDLPLVLPNVVHDGDFTLQEGKVRAFYAGPAHTPDGIFVYFPDEQVLYGNCILKEKLGNLSFANVKAYPQTIERLKAMKLPIKTVIGGHDSPLHGPELIDHYEELIKAVPQS	1	254	99.6063	0	0	0	254	Cluster_4	ChpA_family_subclass_B2_metallo-beta-lactamase_ImiS_NG_050415.1_cds_WP_063865298.1_1	Cluster_4	SP_Sec_SPI_	27-28	SP_Sec_SPI_	27-28	N_Y_H_T_D	C	H	.	.
B2_1191	GCF_001604855.1	644	644	Aeromonas_hydrophila	Bacteria-Pseudomonadota-Gammaproteobacteria-Aeromonadales-Aeromonadaceae-Aeromonas-	4969906	NZ_LRRW01000004.1	class_B2	545.2	+	240140	240899	240138	240902	ATGATGAAAGGTTGGATGAAGTGCGGGTTGGCCGGGGCCGTGGTGCTGATGGCGAGTTTCTGGGGTGGCAGCGTGCGGGCGGCAGGGATCTCCCTCAAGCAGGTGAGCGGCCCGGTCTATGTGGTGGAGGACAACTACTACGTCAAAGAGAACTCCATGGTCTATTTCGGGGCCAAGGGGGTGACTGTGGTGGGGGCGACCTGGACGCCGGATACCGCCCGCGAGCTGCACAAGCTGATCAAACGGGTCAGCAGCAAGCCGGTGCTGGAGGTGATCAACACCAACTACCACACCGACCGGGCGGGCGGTAACGCCTACTGGAAGTCCATCGGGGCCAAGGTGGTGGCGACACGCCAGACCCGGGATCTGATGAAGAGCGACTGGGCCGAGATTGTCGCC…	WP_080644389.1	CphA_family_subclass_B2_metallo-beta-lactamase	MMKGWMKCGLAGAVVLMASFWGGSVRAAGISLKQVSGPVYVVEDNYYVKENSMVYFGAKGVTVVGATWTPDTARELHKLIKRVSSKPVLEVINTNYHTDRAGGNAYWKSIGAKVVATRQTRDLMKSDWAEIVAFTRKGLPEYPDLPLVLPNVVHDGDFTLQEGKVRAFYAGPAHTPDGIFVYFPDEQVLYGNCILKEKLGNLSFANVKAYPQTIERLKAMKLPIKTVIGGHDSPLHGPELIDHYEELIKAVPQS	ORF_OK	TRUE_HIT	mmkgwikcglagavvllasfwggsvraagislkqvsgpvyvvednyyvkensmvyfgakgvtvvgatwtpdtarelhklikrvsskpvlevintnyhtdraggnaywksigakvvatrqtrdlmksdwaeivaftrkglpeypdlplvlpnvvhdgdftlqegkvralyagpahtpdgifvyfpdeqvlygncilkeklgnlsfadvkaypktlerlkalklpiktvigghdsplhgpelidhyealikaaaks	MMKGWMKCGLAGAVVLMASFWGGSVRAAGISLKQVSGPVYVVEDNYYVKENSMVYFGAKGVTVVGATWTPDTARELHKLIKRVSSKPVLEVINTNYHTDRAGGNAYWKSIGAKVVATRQTRDLMKSDWAEIVAFTRKGLPEYPDLPLVLPNVVHDGDFTLQEGKVRAFYAGPAHTPDGIFVYFPDEQVLYGNCILKEKLGNLSFANVKAYPQTIERLKAMKLPIKTVIGGHDSPLHGPELIDHYEELIKAVPQS	1	254	99.6063	0	0	0	254	Cluster_4	ChpA_family_subclass_B2_metallo-beta-lactamase_ImiS_NG_050415.1_cds_WP_063865298.1_1	Cluster_4	SP_Sec_SPI_	27-28	SP_Sec_SPI_	27-28	N_Y_H_T_D	C	H	.	.
B2_1192	GCF_001604895.1	644	644	Aeromonas_hydrophila	Bacteria-Pseudomonadota-Gammaproteobacteria-Aeromonadales-Aeromonadaceae-Aeromonas-	4965942	NZ_LRRX01000003.1	class_B2	544.3	-	13704	14463	13702	14466	ATGATGAAAGGTTGGATGAAGTGCGGGTTGGCCGGGGCCGTGGTGCTGATGGCGAGTTTCTGGGGTGGCAGCGTGCGGGCGGCAGGGATCTCCCTCAAGCAGGTGAGCGGCCCGGTCTATGTGGTGGAGGACAACTACTACGTCAAAGAGAACTCCATGGTCTATTTCGGGGCCAAGGGGGTGACTGTGGTGGGGGCGACCTGGACGCCGGATACCGCCCGCGAGCTGCACAAGCTGATCAAACGGGTCAGCAGCAAGCCGGTGCTGGAGGTGATCAACACCAACTACCACACCGACCGGGCGGGCGGTAACGCCTACTGGAAGTCCATCGGGGCCAAGGTGGTGGCGACACGCCAGACCCGGGATCTGATGAAGAGCGACTGGGCCGAGATTGTCGCC…	WP_080644389.1	CphA_family_subclass_B2_metallo-beta-lactamase	MMKGWMKCGLAGAVVLMASFWGGSVRAAGISLKQVSGPVYVVEDNYYVKENSMVYFGAKGVTVVGATWTPDTARELHKLIKRVSSKPVLEVINTNYHTDRAGGNAYWKSIGAKVVATRQTRDLMKSDWAEIVAFTRKGLPEYPDLPLVLPNVVHDGDFTLQEGKVRAFYAGPAHTPDGIFVYFPDEQVLYGNCILKEKLGNLSFANVKAYPQTIERLKAMKLPIKTVIGGHDSPLHGPELIDHYEELIKAVPQS	ORF_OK	TRUE_HIT	mmkgwikcglagavvllasfwggsvraagislkqvsgpvyvvednyyvkensmvyfgakgvtvvgatwtpdtarelhklikrvsskpvlevintnyhtdraggnaywksigakvvatrqtrdlmksdwaeivaftrkglpeypdlplvlpnvvhdgdftlqegkvralyagpahtpdgifvyfpdeqvlygncilkeklgnlsfadvkaypktlerlkalklpiktvigghdsplhgpelidhyealikaaaks	MMKGWMKCGLAGAVVLMASFWGGSVRAAGISLKQVSGPVYVVEDNYYVKENSMVYFGAKGVTVVGATWTPDTARELHKLIKRVSSKPVLEVINTNYHTDRAGGNAYWKSIGAKVVATRQTRDLMKSDWAEIVAFTRKGLPEYPDLPLVLPNVVHDGDFTLQEGKVRAFYAGPAHTPDGIFVYFPDEQVLYGNCILKEKLGNLSFANVKAYPQTIERLKAMKLPIKTVIGGHDSPLHGPELIDHYEELIKAVPQS	1	254	99.6063	0	0	0	254	Cluster_4	ChpA_family_subclass_B2_metallo-beta-lactamase_ImiS_NG_050415.1_cds_WP_063865298.1_1	Cluster_4	SP_Sec_SPI_	27-28	SP_Sec_SPI_	27-28	N_Y_H_T_D	C	H	.	.
B2_1193	GCF_001604905.1	644	644	Aeromonas_hydrophila	Bacteria-Pseudomonadota-Gammaproteobacteria-Aeromonadales-Aeromonadaceae-Aeromonas-	4969986	NZ_LRRY01000004.1	class_B2	544.3	-	13872	14631	13870	14634	ATGATGAAAGGTTGGATGAAGTGCGGGTTGGCCGGGGCCGTGGTGCTGATGGCGAGTTTCTGGGGTGGCAGCGTGCGGGCGGCAGGGATCTCCCTCAAGCAGGTGAGCGGCCCGGTCTATGTGGTGGAGGACAACTACTACGTCAAAGAGAACTCCATGGTCTATTTCGGGGCCAAGGGGGTGACTGTGGTGGGGGCGACCTGGACGCCGGATACCGCCCGCGAGCTGCACAAGCTGATCAAACGGGTCAGCAGCAAGCCGGTGCTGGAGGTGATCAACACCAACTACCACACCGACCGGGCGGGCGGTAACGCCTACTGGAAGTCCATCGGGGCCAAGGTGGTGGCGACACGCCAGACCCGGGATCTGATGAAGAGCGACTGGGCCGAGATTGTCGCC…	WP_080644389.1	CphA_family_subclass_B2_metallo-beta-lactamase	MMKGWMKCGLAGAVVLMASFWGGSVRAAGISLKQVSGPVYVVEDNYYVKENSMVYFGAKGVTVVGATWTPDTARELHKLIKRVSSKPVLEVINTNYHTDRAGGNAYWKSIGAKVVATRQTRDLMKSDWAEIVAFTRKGLPEYPDLPLVLPNVVHDGDFTLQEGKVRAFYAGPAHTPDGIFVYFPDEQVLYGNCILKEKLGNLSFANVKAYPQTIERLKAMKLPIKTVIGGHDSPLHGPELIDHYEELIKAVPQS	ORF_OK	TRUE_HIT	mmkgwikcglagavvllasfwggsvraagislkqvsgpvyvvednyyvkensmvyfgakgvtvvgatwtpdtarelhklikrvsskpvlevintnyhtdraggnaywksigakvvatrqtrdlmksdwaeivaftrkglpeypdlplvlpnvvhdgdftlqegkvralyagpahtpdgifvyfpdeqvlygncilkeklgnlsfadvkaypktlerlkalklpiktvigghdsplhgpelidhyealikaaaks	MMKGWMKCGLAGAVVLMASFWGGSVRAAGISLKQVSGPVYVVEDNYYVKENSMVYFGAKGVTVVGATWTPDTARELHKLIKRVSSKPVLEVINTNYHTDRAGGNAYWKSIGAKVVATRQTRDLMKSDWAEIVAFTRKGLPEYPDLPLVLPNVVHDGDFTLQEGKVRAFYAGPAHTPDGIFVYFPDEQVLYGNCILKEKLGNLSFANVKAYPQTIERLKAMKLPIKTVIGGHDSPLHGPELIDHYEELIKAVPQS	1	254	99.6063	0	0	0	254	Cluster_4	ChpA_family_subclass_B2_metallo-beta-lactamase_ImiS_NG_050415.1_cds_WP_063865298.1_1	Cluster_4	SP_Sec_SPI_	27-28	SP_Sec_SPI_	27-28	N_Y_H_T_D	C	H	.	.
B2_1194	GCF_001634325.1	654	654	Aeromonas_veronii	Bacteria-Pseudomonadota-Gammaproteobacteria-Aeromonadales-Aeromonadaceae-Aeromonas-	4955058	NZ_CP014774.1	class_B2	541.1	+	3660265	3661024	3660263	3661027	ATGATGAAAGGTTGGATGAAATGCGGGTTGGCCGGGGCCGTGGTGCTGATGGCGAGTTTCTGGGGTGGCAGCGTGCGGGCGGCGGGGATCTCCCTCAAGCAGGTGAGCGGCCCTGTCTATGTTGTTGAAGATAACTACTACGTCAAAGAGAACTCCATGGTCTATTTCGGGGCCAAAGGGGTGACTGTGGTGGGGGCGACCTGGACGCCGGATACCGCCCGCGAGCTGCATAAGCTCATTAAACGGGTCAGCAGCAAGCCGGTGCTGGAGGTGATCAACACCAACTACCACACCGATCGGGCGGGCGGTAACGCCTACTGGAAGTCCATCGGGGCCAAGGTGGTGGCGACGCGCCAGACCCGGGATCTGATGAAGAGCGACTGGGCCGAGATTGTCACC…	WP_081250425.1	CphA_family_subclass_B2_metallo-beta-lactamase	MMKGWMKCGLAGAVVLMASFWGGSVRAAGISLKQVSGPVYVVEDNYYVKENSMVYFGAKGVTVVGATWTPDTARELHKLIKRVSSKPVLEVINTNYHTDRAGGNAYWKSIGAKVVATRQTRDLMKSDWAEIVTFTRKGLPEYPDLPLVLPNVVHDGDFTLQEGKVRAFYAGPAHTPDGIFVYFPDEQVLYGNCILKEKLGNLSFANVKEYPQTIERLKAMKLPIKTVIGGHDSPLHGPELIDHYEELIKAAPQS	ORF_OK	TRUE_HIT	mmkgwikcglagavvllasfwggsvraagislkqvsgpvyvvednyyvkensmvyfgakgvtvvgatwtpdtarelhklikrvsskpvlevintnyhtdraggnaywksigakvvatrqtrdlmksdwaeivaftrkglpeypdlplvlpnvvhdgdftlqegkvralyagpahtpdgifvyfpdeqvlygncilkeklgnlsfadvkaypktlerlkalklpiktvigghdsplhgpelidhyealikaaaks	MMKGWMKCGLAGAVVLMASFWGGSVRAAGISLKQVSGPVYVVEDNYYVKENSMVYFGAKGVTVVGATWTPDTARELHKLIKRVSSKPVLEVINTNYHTDRAGGNAYWKSIGAKVVATRQTRDLMKSDWAEIVTFTRKGLPEYPDLPLVLPNVVHDGDFTLQEGKVRAFYAGPAHTPDGIFVYFPDEQVLYGNCILKEKLGNLSFANVKEYPQTIERLKAMKLPIKTVIGGHDSPLHGPELIDHYEELIKAAPQS	1	254	99.6063	0	0	0	254	Cluster_4	ChpA_family_subclass_B2_metallo-beta-lactamase_ImiS_NG_050415.1_cds_WP_063865298.1_1	Cluster_4	SP_Sec_SPI_	27-28	SP_Sec_SPI_	27-28	N_Y_H_T_D	C	H	.	.
B2_1195	GCF_001643275.2	29491	645	Aeromonas_salmonicida_subsp_salmonicida	Bacteria-Pseudomonadota-Gammaproteobacteria-Aeromonadales-Aeromonadaceae-Aeromonas-	4897684	NZ_CP048223.1	class_B2	535.3	+	2439302	2440058	2439303	2440064	ATGAAAGGTTGGATAAAGTGCGGGCTGGCCGGAGCTGTGGTGCTGGTGGCGAGTTTCTGGGGCGGCAGCGTGCATGCGGCGGCGATCTCCCTCACTCAGGTAAGCGGCCCTGTCTATGTGGTGGAGGATAACTACTACGTCAAAGAGAACTCCATGGTTTATTTCGGAGCCAAGGGAGTGACGATAGTGGGGGCGACCTGGACGCCGGATACCGCCCGCGAGCTGCACAAGCTGATCAAACGGGTCAGCAACAAGCCTGTGCTGGAGGTGATCAACACCAACTACCACACGGACAGGGCAGGGGGTAACGCCTACTGGAAGTCCATCGGTGCCAAGGTGGTCTCGACCCGCCAGACCCGGGATCTGATGAAGAGCGACTGGGCCGAGATCGTCGCCTTT…	WP_005320513.1	CphA_family_subclass_B2_metallo-beta-lactamase	MKGWIKCGLAGAVVLVASFWGGSVHAAAISLTQVSGPVYVVEDNYYVKENSMVYFGAKGVTIVGATWTPDTARELHKLIKRVSNKPVLEVINTNYHTDRAGGNAYWKSIGAKVVSTRQTRDLMKSDWAEIVAFTRKGLPEYPDLPLVLPNVVHDGDFNLQEGKVRAFYAGPAHTPDGIFVYFPDQQVLYGNCILKEKLGNLSFADVKAYPQTLERLKAMKLPIKIVVGGHDSPLHGPELIDHYQALIKAAPQA	ORF_OK	TRUE_HIT	mmkgwikcglagavvllasfwggsvraagislkqvsgpvyvvednyyvkensmvyfgakgvtvvgatwtpdtarelhklikrvsskpvlevintnyhtdraggnaywksigakvvatrqtrdlmksdwaeivaftrkglpeypdlplvlpnvvhdgdftlqegkvralyagpahtpdgifvyfpdeqvlygncilkeklgnlsfadvkaypktlerlkalklpiktvigghdsplhgpelidhyealikaaak	MMKGWIKCGLAGAVVLVASFWGGSVHAAAISLTQVSGPVYVVEDNYYVKENSMVYFGAKGVTIVGATWTPDTARELHKLIKRVSNKPVLEVINTNYHTDRAGGNAYWKSIGAKVVSTRQTRDLMKSDWAEIVAFTRKGLPEYPDLPLVLPNVVHDGDFNLQEGKVRAFYAGPAHTPDGIFVYFPDQQVLYGNCILKEKLGNLSFADVKAYPQTLERLKAMKLPIKIVVGGHDSPLHGPELIDHYQALIKAAPQ	1	253	99.2126	0	0	0	253	Cluster_4	ChpA_family_subclass_B2_metallo-beta-lactamase_ImiS_NG_050415.1_cds_WP_063865298.1_1	Cluster_4	SP_Sec_SPI_	26-27	SP_Sec_SPI_	26-27	N_Y_H_T_D	C	H	.	.
B2_1196	GCF_001643285.1	29491	645	Aeromonas_salmonicida_subsp_salmonicida	Bacteria-Pseudomonadota-Gammaproteobacteria-Aeromonadales-Aeromonadaceae-Aeromonas-	4746942	NZ_LSGY01000098.1	class_B2	541.4	-	10999	11755	10994	11755	ATGAAAGGTTGGATAAAGTGCGGGCTGGCCGGAGCTGTGGTGCTGGTGGCGAGTTTCTGGGGCGGCAGCGTGCATGCGGCGGCGATCTCCCTCACTCAGGTAAGCGGCCCTGTCTATGTGGTGGAGGATAACTACTACGTCAAAGAGAACTCCATGGTTTATTTCGGAGCCAAGGGAGTGACGATAGTGGGGGCGACCTGGACGCCGGATACCGCCCGCGAGCTGCACAAGCTGATCAAACGGGTCAGCAACAAGCCTGTGCTGGAGGTGATCAACACCAACTACCACACGGACAGGGCAGGGGGTAACGCCTACTGGAAGTCCATCGGTGCCAAGGTGGTCTCGACCCGCCAGACCCGGGATCTGATGAAGAGCGACTGGGCCGAGATCGTCGCCTTT…	WP_005320513.1	CphA_family_subclass_B2_metallo-beta-lactamase	MKGWIKCGLAGAVVLVASFWGGSVHAAAISLTQVSGPVYVVEDNYYVKENSMVYFGAKGVTIVGATWTPDTARELHKLIKRVSNKPVLEVINTNYHTDRAGGNAYWKSIGAKVVSTRQTRDLMKSDWAEIVAFTRKGLPEYPDLPLVLPNVVHDGDFNLQEGKVRAFYAGPAHTPDGIFVYFPDQQVLYGNCILKEKLGNLSFADVKAYPQTLERLKAMKLPIKIVVGGHDSPLHGPELIDHYQALIKAAPQA	ORF_OK	TRUE_HIT	mmkgwikcglagavvllasfwggsvraagislkqvsgpvyvvednyyvkensmvyfgakgvtvvgatwtpdtarelhklikrvsskpvlevintnyhtdraggnaywksigakvvatrqtrdlmksdwaeivaftrkglpeypdlplvlpnvvhdgdftlqegkvralyagpahtpdgifvyfpdeqvlygncilkeklgnlsfadvkaypktlerlkalklpiktvigghdsplhgpelidhyealikaaak	MMKGWIKCGLAGAVVLVASFWGGSVHAAAISLTQVSGPVYVVEDNYYVKENSMVYFGAKGVTIVGATWTPDTARELHKLIKRVSNKPVLEVINTNYHTDRAGGNAYWKSIGAKVVSTRQTRDLMKSDWAEIVAFTRKGLPEYPDLPLVLPNVVHDGDFNLQEGKVRAFYAGPAHTPDGIFVYFPDQQVLYGNCILKEKLGNLSFADVKAYPQTLERLKAMKLPIKIVVGGHDSPLHGPELIDHYQALIKAAPQ	1	253	99.2126	0	0	0	253	Cluster_4	ChpA_family_subclass_B2_metallo-beta-lactamase_ImiS_NG_050415.1_cds_WP_063865298.1_1	Cluster_4	SP_Sec_SPI_	26-27	SP_Sec_SPI_	26-27	N_Y_H_T_D	C	H	.	.
B2_1197	GCF_001643305.1	29491	645	Aeromonas_salmonicida_subsp_salmonicida	Bacteria-Pseudomonadota-Gammaproteobacteria-Aeromonadales-Aeromonadaceae-Aeromonas-	4728143	NZ_LSGW01000102.1	class_B2	541.4	-	10999	11755	10994	11755	ATGAAAGGTTGGATAAAGTGCGGGCTGGCCGGAGCTGTGGTGCTGGTGGCGAGTTTCTGGGGCGGCAGCGTGCATGCGGCGGCGATCTCCCTCACTCAGGTAAGCGGCCCTGTCTATGTGGTGGAGGATAACTACTACGTCAAAGAGAACTCCATGGTTTATTTCGGAGCCAAGGGAGTGACGATAGTGGGGGCGACCTGGACGCCGGATACCGCCCGCGAGCTGCACAAGCTGATCAAACGGGTCAGCAACAAGCCTGTGCTGGAGGTGATCAACACCAACTACCACACGGACAGGGCAGGGGGTAACGCCTACTGGAAGTCCATCGGTGCCAAGGTGGTCTCGACCCGCCAGACCCGGGATCTGATGAAGAGCGACTGGGCCGAGATCGTCGCCTTT…	WP_005320513.1	CphA_family_subclass_B2_metallo-beta-lactamase	MKGWIKCGLAGAVVLVASFWGGSVHAAAISLTQVSGPVYVVEDNYYVKENSMVYFGAKGVTIVGATWTPDTARELHKLIKRVSNKPVLEVINTNYHTDRAGGNAYWKSIGAKVVSTRQTRDLMKSDWAEIVAFTRKGLPEYPDLPLVLPNVVHDGDFNLQEGKVRAFYAGPAHTPDGIFVYFPDQQVLYGNCILKEKLGNLSFADVKAYPQTLERLKAMKLPIKIVVGGHDSPLHGPELIDHYQALIKAAPQA	ORF_OK	TRUE_HIT	mmkgwikcglagavvllasfwggsvraagislkqvsgpvyvvednyyvkensmvyfgakgvtvvgatwtpdtarelhklikrvsskpvlevintnyhtdraggnaywksigakvvatrqtrdlmksdwaeivaftrkglpeypdlplvlpnvvhdgdftlqegkvralyagpahtpdgifvyfpdeqvlygncilkeklgnlsfadvkaypktlerlkalklpiktvigghdsplhgpelidhyealikaaak	MMKGWIKCGLAGAVVLVASFWGGSVHAAAISLTQVSGPVYVVEDNYYVKENSMVYFGAKGVTIVGATWTPDTARELHKLIKRVSNKPVLEVINTNYHTDRAGGNAYWKSIGAKVVSTRQTRDLMKSDWAEIVAFTRKGLPEYPDLPLVLPNVVHDGDFNLQEGKVRAFYAGPAHTPDGIFVYFPDQQVLYGNCILKEKLGNLSFADVKAYPQTLERLKAMKLPIKIVVGGHDSPLHGPELIDHYQALIKAAPQ	1	253	99.2126	0	0	0	253	Cluster_4	ChpA_family_subclass_B2_metallo-beta-lactamase_ImiS_NG_050415.1_cds_WP_063865298.1_1	Cluster_4	SP_Sec_SPI_	26-27	SP_Sec_SPI_	26-27	N_Y_H_T_D	C	H	.	.
B2_1198	GCF_001643355.2	29491	645	Aeromonas_salmonicida_subsp_salmonicida	Bacteria-Pseudomonadota-Gammaproteobacteria-Aeromonadales-Aeromonadaceae-Aeromonas-	4894354	NZ_CP109908.1	class_B2	535.3	+	86808	87564	86809	87570	ATGAAAGGTTGGATAAAGTGCGGGCTGGCCGGAGCTGTGGTGCTGGTGGCGAGTTTCTGGGGCGGCAGCGTGCATGCGGCGGCGATCTCCCTCACTCAGGTAAGCGGCCCTGTCTATGTGGTGGAGGATAACTACTACGTCAAAGAGAACTCCATGGTTTATTTCGGAGCCAAGGGAGTGACGATAGTGGGGGCGACCTGGACGCCGGATACCGCCCGCGAGCTGCACAAGCTGATCAAACGGGTCAGCAACAAGCCTGTGCTGGAGGTGATCAACACCAACTACCACACGGACAGGGCAGGGGGTAACGCCTACTGGAAGTCCATCGGTGCCAAGGTGGTCTCGACCCGCCAGACCCGGGATCTGATGAAGAGCGACTGGGCCGAGATCGTCGCCTTT…	WP_005320513.1	CphA_family_subclass_B2_metallo-beta-lactamase	MKGWIKCGLAGAVVLVASFWGGSVHAAAISLTQVSGPVYVVEDNYYVKENSMVYFGAKGVTIVGATWTPDTARELHKLIKRVSNKPVLEVINTNYHTDRAGGNAYWKSIGAKVVSTRQTRDLMKSDWAEIVAFTRKGLPEYPDLPLVLPNVVHDGDFNLQEGKVRAFYAGPAHTPDGIFVYFPDQQVLYGNCILKEKLGNLSFADVKAYPQTLERLKAMKLPIKIVVGGHDSPLHGPELIDHYQALIKAAPQA	ORF_OK	TRUE_HIT	mmkgwikcglagavvllasfwggsvraagislkqvsgpvyvvednyyvkensmvyfgakgvtvvgatwtpdtarelhklikrvsskpvlevintnyhtdraggnaywksigakvvatrqtrdlmksdwaeivaftrkglpeypdlplvlpnvvhdgdftlqegkvralyagpahtpdgifvyfpdeqvlygncilkeklgnlsfadvkaypktlerlkalklpiktvigghdsplhgpelidhyealikaaak	MMKGWIKCGLAGAVVLVASFWGGSVHAAAISLTQVSGPVYVVEDNYYVKENSMVYFGAKGVTIVGATWTPDTARELHKLIKRVSNKPVLEVINTNYHTDRAGGNAYWKSIGAKVVSTRQTRDLMKSDWAEIVAFTRKGLPEYPDLPLVLPNVVHDGDFNLQEGKVRAFYAGPAHTPDGIFVYFPDQQVLYGNCILKEKLGNLSFADVKAYPQTLERLKAMKLPIKIVVGGHDSPLHGPELIDHYQALIKAAPQ	1	253	99.2126	0	0	0	253	Cluster_4	ChpA_family_subclass_B2_metallo-beta-lactamase_ImiS_NG_050415.1_cds_WP_063865298.1_1	Cluster_4	SP_Sec_SPI_	26-27	SP_Sec_SPI_	26-27	N_Y_H_T_D	C	H	.	.
B2_1199	GCF_001647435.1	654	654	Aeromonas_veronii	Bacteria-Pseudomonadota-Gammaproteobacteria-Aeromonadales-Aeromonadaceae-Aeromonas-	4523432	NZ_LRBO01000019.1	class_B2	548.2	+	36915	37674	36913	37677	ATGATGAAAGGTTGGATGAAGTGCGGCTTGGCCGGGGCCGTGGTGCTGATGGCGAGTTTCTGGGGCGGCAGCGTGCGGGCGGCGGGGATCGAGCTCAAGCAGGTGAGTGGCCCTGTCTATGTGGTGGAGGACAACTACTACGTCAAAGAGAACTCCATGGTCTATTTCGGGGCCAAGGGGGTGACGGTGGTGGGGGCGACCTGGACGCCGGATACCGCCCGCGAGCTGCACAAGCTGATCAAACGGGTCAGCAGCAAGCCGGTGCTGGAGGTGATCAACACCAACTACCACACCGATCGGGCGGGTGGTAACGCCTACTGGAAGTCCATTGGCGCCAAGGTGGTCTCGACCCGCCAGACCCGGGATCTGATGAAGAGCGACTGGGCCGAGATTGTCGCC…	WP_081253301.1	CphA_family_subclass_B2_metallo-beta-lactamase	MMKGWMKCGLAGAVVLMASFWGGSVRAAGIELKQVSGPVYVVEDNYYVKENSMVYFGAKGVTVVGATWTPDTARELHKLIKRVSSKPVLEVINTNYHTDRAGGNAYWKSIGAKVVSTRQTRDLMKSDWAEIVAFTRKGLPEYPDLPLVLPNVVHDGDFTLQEGKVRAFYAGPAHTPDGIFVYFPDEQVLYGNCILKEKLGNLSFANVKAYPQTIERLKAMKLPIKTVIGGHDSPLHGPELIDHYEELIKAAPQS	ORF_OK	TRUE_HIT	mmkgwikcglagavvllasfwggsvraagislkqvsgpvyvvednyyvkensmvyfgakgvtvvgatwtpdtarelhklikrvsskpvlevintnyhtdraggnaywksigakvvatrqtrdlmksdwaeivaftrkglpeypdlplvlpnvvhdgdftlqegkvralyagpahtpdgifvyfpdeqvlygncilkeklgnlsfadvkaypktlerlkalklpiktvigghdsplhgpelidhyealikaaaks	MMKGWMKCGLAGAVVLMASFWGGSVRAAGIELKQVSGPVYVVEDNYYVKENSMVYFGAKGVTVVGATWTPDTARELHKLIKRVSSKPVLEVINTNYHTDRAGGNAYWKSIGAKVVSTRQTRDLMKSDWAEIVAFTRKGLPEYPDLPLVLPNVVHDGDFTLQEGKVRAFYAGPAHTPDGIFVYFPDEQVLYGNCILKEKLGNLSFANVKAYPQTIERLKAMKLPIKTVIGGHDSPLHGPELIDHYEELIKAAPQS	1	254	99.6063	0	0	0	254	Cluster_4	ChpA_family_subclass_B2_metallo-beta-lactamase_ImiS_NG_050415.1_cds_WP_063865298.1_1	Cluster_4	SP_Sec_SPI_	27-28	SP_Sec_SPI_	27-28	N_Y_H_T_D	C	H	.	.
B2_12	GCF_002882925.1	2751333	2751333	Pseudomonas_sp_FW305-3-2-15-C-R2A1	Bacteria-Pseudomonadota-Gammaproteobacteria-Pseudomonadales-Pseudomonadaceae-Pseudomonas-unclassified_Pseudomonas-	6618081	NZ_POEJ01000032.1	class_B2	374.9	-	7051	7780	7040	7801	ATGAAGCTTAGCAGTATTCTCTCAGCCCTTAGCATGGCCTGCGTCACCTGTCAGGTAATCGCTAACGACACGAACCTGACTCTCACCCACTTCAAAGGCCCGCTCTACATCGTTGAAGACAAAGAGTATGTGCAAGAAAATTCAATGGTCTACATCGGTGCGCAAAACATCACGATTATCGGCGCAACCTGGACCCCAGCAACCGCCGAGAAGCTGGAGCAGGAAATCAGGAGAGTCAGCCCCCTGCCCATCAAGGACGTAATCAACACCAACTACCACACCGACCGCGCGGGCGGTAACGCGTACTGGAAAAAGCGCGGCGCGAGTATCGTCTCCACGCAGATGACCTATGACCTGGAAAAAAGCCAGTGGCGCAGTATTGTCGACTTCACCCGCCAA…	WP_102591908.1	SFH-related_subclass_B2_metallo-beta-lactamase	MKLSSILSALSMACVTCQVIANDTNLTLTHFKGPLYIVEDKEYVQENSMVYIGAQNITIIGATWTPATAEKLEQEIRRVSPLPIKDVINTNYHTDRAGGNAYWKKRGASIVSTQMTYDLEKSQWRSIVDFTRQGMEHFPVLEQSLPDKVHPGDFTLQNGNVRAMYLGAAHTEDGIFVYFPEERVLYGNCILKEKLGNMTFANRTEYPKTLKKLQGLIDSGELPVDAIIAGHNSPIQGVELIDQYLNLLEHDKH	ORF_OK	TRUE_HIT	gavvllasfwggsvraagi.slkqvsgpvyvvednyyvkensmvyfgakgvtvvgatwtpdtarelhklikrvsskpvlevintnyhtdraggnaywksigakvvatrqtrdlmksdwaeivaftrkglpeypdlplvlpnvvhdgdftlqegkvralyagpahtpdgifvyfpdeqvlygncilkeklgnlsfadvkaypktlerlkal....klpiktvigghdsplhgpelidhyealika	LSALSMACVTCQVIANDTNlTLTHFKGPLYIVEDKEYVQENSMVYIGAQNITIIGATWTPATAEKLEQEIRRVSPLPIKDVINTNYHTDRAGGNAYWKKRGASIVSTQMTYDLEKSQWRSIVDFTRQGMEHFPVLEQSLPDKVHPGDFTLQNGNVRAMYLGAAHTEDGIFVYFPEERVLYGNCILKEKLGNMTFANRTEYPKTLKKLQGLidsgELPVDAIIAGHNSPIQGVELIDQYLNLLEH	12	250	93.7008	5	0	0	253	Cluster_1	CLUSTER_NOT_IN_NCBI_AMR_REF_DB	Cluster_1	SP_Sec_SPI_	21-22	LIPO_Sec_SPII_	13-14	N_Y_H_T_D	C	Q	.	.
B2_120	GCF_008802305.1	654	654	Aeromonas_veronii	Bacteria-Pseudomonadota-Gammaproteobacteria-Aeromonadales-Aeromonadaceae-Aeromonas-	4431803	NZ_VZQA01000089.1	class_B2	505	+	1730	2432	1692	2435	GTGCACATTGGCCGGGGCCGTGGTGCTGATGGCGAGTTTCTGGGGTGCAGCGTGCGGGCGGCGGGGATCTCCCTTAAGCAGGTGAGTGGCCCTGTCTATGTGGTTGAAGATAACTACTACGTAAAGGAAAACTCCATGGTCTATTTCGGGGCCAAGGGGGTGACTGTGGTGGGGGCGACCTGGACGCCGGATACCGCGCGCGAGCTGCACAAGCTGATCAAACGGGTCAGCAGCAAGCCGGTGCTGGAGGTGATCAACACCAACTACCACACCGATCGGGCGGGCGGTAACGCCTACTGGAAGTCCATCGGGGCCAAGGTGGTGGCGACGCGTCAGACCCGGGATCTGATGAAGAGCGACTGGGCCGAGATTGTCGCCTTTACCCGCAAGGGGCTGCCG…	WP_150998896.1	CphA_family_subclass_B2_metallo-beta-lactamase	MHIGRGRGADGEFLGCSVRAAGISLKQVSGPVYVVEDNYYVKENSMVYFGAKGVTVVGATWTPDTARELHKLIKRVSSKPVLEVINTNYHTDRAGGNAYWKSIGAKVVATRQTRDLMKSDWAEIVAFTRKGLPEYPDLPLVLPNVVHDGDFKLQEGKVRAFYAGPAHTPDGIFVYFPDEQVLYGNCILKEKLGNLSFANVKAYPQTIERLKAMKLPIKTVIGGHDSPLHGPELIDHYEELIKAVPQS	ORF_OK	TRUE_HIT	fwggsvraagislkqvsgpvyvvednyyvkensmvyfgakgvtvvgatwtpdtarelhklikrvsskpvlevintnyhtdraggnaywFLGCSVRAAGISLKQVSGPVYVVEDNYYVKENSMVYFGAKGVTVVGATWTPDTARELHKLIKRVSSKPVLEVINTNYHTDRAGGNAYWKSIGAKVVATRQTRDLMKSDWAEIVAFTRKGLPEYPDLPLVLPNVVHDGDFKLQEGKVRAFYAGPAHTPDGIFVYFPDEQVLYGNCILKEKLGNLSFANVKAYPQTIERLKAMKLPIKTVIGGHDSPLHGPELIDHYEELIKAVPQS	svraagislkqvsgpvyvvednyyvkensmvyfgakgvtvvgatwtpdtarelhklikrvsskpvlevintnyhtdraggnaywksigakvvatrqtrdlmksdwaeivaftrkglpeypdlplvlpnvvhdgdftlqegkvralyagpahtpdgifvyfpdeqvlygncilkeklgnlsfadvkaypktlerlkalklpiktvigghdsplhgpelidhyealikaaaks	20	254	92.126	0	0	0	247	Cluster_4	ChpA_family_subclass_B2_metallo-beta-lactamase_ImiS_NG_050415.1_cds_WP_063865298.1_1	Cluster_4	OTHER	0	OTHER	0	d_r_a_g_g	gnc_region_disrupted_incoclusive	dhy_region_disrupted_incoclusive	.	.
B2_1200	GCF_001673685.1	196024	196024	Aeromonas_dhakensis	Bacteria-Pseudomonadota-Gammaproteobacteria-Aeromonadales-Aeromonadaceae-Aeromonas-	4750839	NZ_LZFM01000020.1	class_B2	542.8	+	257	1016	258	1019	ATGAAAGGTTGGATAAAGTGCGGGCTGGCCGGGGCCCTGGTGCTGATGGCGAGTTTCTGGGGTGGCAGCGTGCGAGCGGCGGGGATATCGCTGACGCAGGTAAGCGGTCCTGTCTATGTAGTGGAGGACAACTACTACATACAGGAAAACTCCATGGTCTATTTCGGGGCCAAGGGAGTGACTGTGGTGGGGGCGACCTGGACGCCAGATACCGCCCGTGAGCTGCACAAGCTGATCAAACGGGTCAGCCGCCAGCCGGTGCTGGAGGTGATCAACACCAACTACCACACCGACCGGGCGGGTGGTAACGCCTACTGGAAGTCCATCGGTGCCAAGGTGGTATCGACCCGTCAGACCCGGGATCTGATGAAGAGCGACTGGGCCGAGATTGTCGCCTTT…	WP_065017923.1	CphA_family_subclass_B2_metallo-beta-lactamase	MKGWIKCGLAGALVLMASFWGGSVRAAGISLTQVSGPVYVVEDNYYIQENSMVYFGAKGVTVVGATWTPDTARELHKLIKRVSRQPVLEVINTNYHTDRAGGNAYWKSIGAKVVSTRQTRDLMKSDWAEIVAFTRKGLPEYPDLPLVLPNVVHEGDFMLQEGKLRAFYAGPAHTPDGIFVYFPDQQVLYGNCILKEKLGNLSFADVKAYPQTLERLKAMKLPIKTVVGGHDSPLHGPELIDHYEALIKAAPQS	ORF_OK	TRUE_HIT	mmkgwikcglagavvllasfwggsvraagislkqvsgpvyvvednyyvkensmvyfgakgvtvvgatwtpdtarelhklikrvsskpvlevintnyhtdraggnaywksigakvvatrqtrdlmksdwaeivaftrkglpeypdlplvlpnvvhdgdftlqegkvralyagpahtpdgifvyfpdeqvlygncilkeklgnlsfadvkaypktlerlkalklpiktvigghdsplhgpelidhyealikaaaks	MMKGWIKCGLAGALVLMASFWGGSVRAAGISLTQVSGPVYVVEDNYYIQENSMVYFGAKGVTVVGATWTPDTARELHKLIKRVSRQPVLEVINTNYHTDRAGGNAYWKSIGAKVVSTRQTRDLMKSDWAEIVAFTRKGLPEYPDLPLVLPNVVHEGDFMLQEGKLRAFYAGPAHTPDGIFVYFPDQQVLYGNCILKEKLGNLSFADVKAYPQTLERLKAMKLPIKTVVGGHDSPLHGPELIDHYEALIKAAPQS	1	254	99.6063	0	0	0	253	Cluster_4	ChpA_family_subclass_B2_metallo-beta-lactamase_ImiS_NG_050415.1_cds_WP_063865298.1_1	Cluster_4	SP_Sec_SPI_	26-27	SP_Sec_SPI_	26-27	N_Y_H_T_D	C	H	.	.
B2_1201	GCF_001683535.1	644	644	Aeromonas_hydrophila	Bacteria-Pseudomonadota-Gammaproteobacteria-Aeromonadales-Aeromonadaceae-Aeromonas-	4951765	NZ_CP016392.1	class_B2	541	-	4186877	4187636	4186875	4187639	ATGATGAAAGGTTGGATGAAGTGCGGGTTGGCCGGGGCCGTGGTGCTGATGGCGAGTTTCTGGGGTGGCAGCGTGCGGGCGGCAGGGATCTCCCTCAAGCAGGTGAGCGGCCCGGTCTATGTGGTGGAGGACAACTACTACGTCAAAGAGAACTCCATGGTCTATTTCGGGGCCAAGGGGGTGACTGTGGTGGGGGCGACCTGGACGCCGGATACCGCCCGCGAGCTGCACAAGCTGATCAAACGGGTCAGCAGCAAGCCGGTGCTGGAGGTGATCAACACCAACTACCACACCGACCGGGCGGGCGGTAACGCCTACTGGAAGTCCATCGGGGCCAAGGTGGTGGCGACACGCCAGACCCGGGATCTGATGAAGAGCGACTGGGCCGAGATTGTCGCC…	WP_080644389.1	CphA_family_subclass_B2_metallo-beta-lactamase	MMKGWMKCGLAGAVVLMASFWGGSVRAAGISLKQVSGPVYVVEDNYYVKENSMVYFGAKGVTVVGATWTPDTARELHKLIKRVSSKPVLEVINTNYHTDRAGGNAYWKSIGAKVVATRQTRDLMKSDWAEIVAFTRKGLPEYPDLPLVLPNVVHDGDFTLQEGKVRAFYAGPAHTPDGIFVYFPDEQVLYGNCILKEKLGNLSFANVKAYPQTIERLKAMKLPIKTVIGGHDSPLHGPELIDHYEELIKAVPQS	ORF_OK	TRUE_HIT	mmkgwikcglagavvllasfwggsvraagislkqvsgpvyvvednyyvkensmvyfgakgvtvvgatwtpdtarelhklikrvsskpvlevintnyhtdraggnaywksigakvvatrqtrdlmksdwaeivaftrkglpeypdlplvlpnvvhdgdftlqegkvralyagpahtpdgifvyfpdeqvlygncilkeklgnlsfadvkaypktlerlkalklpiktvigghdsplhgpelidhyealikaaaks	MMKGWMKCGLAGAVVLMASFWGGSVRAAGISLKQVSGPVYVVEDNYYVKENSMVYFGAKGVTVVGATWTPDTARELHKLIKRVSSKPVLEVINTNYHTDRAGGNAYWKSIGAKVVATRQTRDLMKSDWAEIVAFTRKGLPEYPDLPLVLPNVVHDGDFTLQEGKVRAFYAGPAHTPDGIFVYFPDEQVLYGNCILKEKLGNLSFANVKAYPQTIERLKAMKLPIKTVIGGHDSPLHGPELIDHYEELIKAVPQS	1	254	99.6063	0	0	0	254	Cluster_4	ChpA_family_subclass_B2_metallo-beta-lactamase_ImiS_NG_050415.1_cds_WP_063865298.1_1	Cluster_4	SP_Sec_SPI_	27-28	SP_Sec_SPI_	27-28	N_Y_H_T_D	C	H	.	.
B2_1202	GCF_001684445.1	644	644	Aeromonas_hydrophila	Bacteria-Pseudomonadota-Gammaproteobacteria-Aeromonadales-Aeromonadaceae-Aeromonas-	5123179	NZ_LYXN01000183.1	class_B2	537.7	+	435885	436644	435886	436647	ATGAAAGGTTGGATAAAGTGCGGATTGGCCGGCGCCGTGGTGCTGATGGCGAGTTTCTGGGGGGGCAGCGTGCGGGCGGCGGGGATGTCGCTGACGCAGGTGAGCGGCCCGGTTTATGTGGTAGAGGACAATTACTACGTGCAGGAAAACTCCATGGTCTATTTCGGGGCCGAGGGAGTGACTGTGGTAGGGGCGACCTGGACGCCGGATACCGCCCGCGAGCTGCACAAGCTGATCAAACGGGTCAGCAGCAAGCCGGTGCTGGAGGTGATCAACACCAACTACCACACCGACCGGGCGGGCGGTAATGCCTACTGGAAGTCCATCGGGGCCAAGGTGGTATCGACCCGCCAGACCCGGGACCTGATGAAGAGTGACTGGGCCGAGATCGTCGCCTTT…	WP_043125254.1	CphA_family_subclass_B2_metallo-beta-lactamase	MKGWIKCGLAGAVVLMASFWGGSVRAAGMSLTQVSGPVYVVEDNYYVQENSMVYFGAEGVTVVGATWTPDTARELHKLIKRVSSKPVLEVINTNYHTDRAGGNAYWKSIGAKVVSTRQTRDLMKSDWAEIVAFTRKGLPDYPDLPLVLPNVVHEGDFTLQGGKLRAFYAGPAHTPDGIFVYFPDQQVLYGNCILKEKLGNLSFADVKAYPQTLERLRAMKLPIKTVVGGHDSPLHGPELIDHYEALIKAAPQS	ORF_OK	TRUE_HIT	mmkgwikcglagavvllasfwggsvraagislkqvsgpvyvvednyyvkensmvyfgakgvtvvgatwtpdtarelhklikrvsskpvlevintnyhtdraggnaywksigakvvatrqtrdlmksdwaeivaftrkglpeypdlplvlpnvvhdgdftlqegkvralyagpahtpdgifvyfpdeqvlygncilkeklgnlsfadvkaypktlerlkalklpiktvigghdsplhgpelidhyealikaaaks	MMKGWIKCGLAGAVVLMASFWGGSVRAAGMSLTQVSGPVYVVEDNYYVQENSMVYFGAEGVTVVGATWTPDTARELHKLIKRVSSKPVLEVINTNYHTDRAGGNAYWKSIGAKVVSTRQTRDLMKSDWAEIVAFTRKGLPDYPDLPLVLPNVVHEGDFTLQGGKLRAFYAGPAHTPDGIFVYFPDQQVLYGNCILKEKLGNLSFADVKAYPQTLERLRAMKLPIKTVVGGHDSPLHGPELIDHYEALIKAAPQS	1	254	99.6063	0	0	0	253	Cluster_4	ChpA_family_subclass_B2_metallo-beta-lactamase_ImiS_NG_050415.1_cds_WP_063865298.1_1	Cluster_4	SP_Sec_SPI_	26-27	SP_Sec_SPI_	26-27	N_Y_H_T_D	C	H	.	.
B2_1203	GCF_001687125.1	644	644	Aeromonas_hydrophila	Bacteria-Pseudomonadota-Gammaproteobacteria-Aeromonadales-Aeromonadaceae-Aeromonas-	5049466	NZ_CP016380.1	class_B2	537	-	4150676	4151435	4150674	4151435	ATGAAAGGTTGGATAAAGTGCGGGCTGGCCGGGGCCGTGGTGCTGATGGCGAGTTTCTGGGGTGGCAGCGTGCGGGCGGCGGGAATGTCGCTGACGCAGGTGAGCGGCCCTGTCTATGTGGTGGAGGACAACTACTACGTCAAAGAGAACTCCATGGTCTATTTCGGGACCAAGGGGGTGACGGTGGTGGGGGCGACCTGGACGCCGGATACCGCCCGCGAGCTGCACAAGCTGATCAAACGGGTCAGCCGTCAGCCGCTGCTGGAGGTGATCAACACCAACTACCACACCGATCGGGCGGGCGGTAACGCCTACTGGAAGTCCATCGGTGCCAAGGTGGTGGCGACGCGCCAGACCCGGGATCTGATGAAGAGCGACTGGGCCGAGATCGTCGCCTTT…	WP_065479520.1	CphA_family_subclass_B2_metallo-beta-lactamase	MKGWIKCGLAGAVVLMASFWGGSVRAAGMSLTQVSGPVYVVEDNYYVKENSMVYFGTKGVTVVGATWTPDTARELHKLIKRVSRQPLLEVINTNYHTDRAGGNAYWKSIGAKVVATRQTRDLMKSDWAEIVAFTRKGLPEYPDLPLVLPNVVHDGDFTLQEGKVRAFYAGPAHTPDGIFVYFPDEQVLYGNCILKEKLGNLSFADVKAYPQTLERLKAMKLPIKTVVGGHDSPLHGPELIDHYEALIKAVPQS	ORF_OK	TRUE_HIT	mmkgwikcglagavvllasfwggsvraagislkqvsgpvyvvednyyvkensmvyfgakgvtvvgatwtpdtarelhklikrvsskpvlevintnyhtdraggnaywksigakvvatrqtrdlmksdwaeivaftrkglpeypdlplvlpnvvhdgdftlqegkvralyagpahtpdgifvyfpdeqvlygncilkeklgnlsfadvkaypktlerlkalklpiktvigghdsplhgpelidhyealikaaaks	MMKGWIKCGLAGAVVLMASFWGGSVRAAGMSLTQVSGPVYVVEDNYYVKENSMVYFGTKGVTVVGATWTPDTARELHKLIKRVSRQPLLEVINTNYHTDRAGGNAYWKSIGAKVVATRQTRDLMKSDWAEIVAFTRKGLPEYPDLPLVLPNVVHDGDFTLQEGKVRAFYAGPAHTPDGIFVYFPDEQVLYGNCILKEKLGNLSFADVKAYPQTLERLKAMKLPIKTVVGGHDSPLHGPELIDHYEALIKAVPQS	1	254	99.6063	0	0	0	253	Cluster_4	ChpA_family_subclass_B2_metallo-beta-lactamase_ImiS_NG_050415.1_cds_WP_063865298.1_1	Cluster_4	SP_Sec_SPI_	26-27	SP_Sec_SPI_	26-27	N_Y_H_T_D	C	H	.	.
B2_1204	GCF_001705905.1	644	644	Aeromonas_hydrophila	Bacteria-Pseudomonadota-Gammaproteobacteria-Aeromonadales-Aeromonadaceae-Aeromonas-	4830274	NZ_LYZF01000002.1	class_B2	537.7	-	13717	14476	13715	14476	ATGAAAGGTTGGATAAAGTGCGGATTGGCCGGCGCCGTGGTGCTGATGGCGAGTTTCTGGGGGGGCAGCGTGCGGGCGGCGGGGATGTCGCTGACGCAGGTGAGCGGCCCGGTTTATGTGGTAGAGGACAATTACTACGTGCAGGAAAACTCCATGGTCTATTTCGGGGCCGAGGGAGTGACTGTGGTAGGGGCGACCTGGACGCCGGATACCGCCCGCGAGCTGCACAAGCTGATCAAACGGGTCAGCAGCAAGCCGGTGCTGGAGGTGATCAACACCAACTACCACACCGACCGGGCGGGCGGTAATGCCTACTGGAAGTCCATCGGGGCCAAGGTGGTATCGACCCGCCAGACCCGGGACCTGATGAAGAGTGACTGGGCCGAGATCGTCGCCTTT…	WP_043125254.1	CphA_family_subclass_B2_metallo-beta-lactamase	MKGWIKCGLAGAVVLMASFWGGSVRAAGMSLTQVSGPVYVVEDNYYVQENSMVYFGAEGVTVVGATWTPDTARELHKLIKRVSSKPVLEVINTNYHTDRAGGNAYWKSIGAKVVSTRQTRDLMKSDWAEIVAFTRKGLPDYPDLPLVLPNVVHEGDFTLQGGKLRAFYAGPAHTPDGIFVYFPDQQVLYGNCILKEKLGNLSFADVKAYPQTLERLRAMKLPIKTVVGGHDSPLHGPELIDHYEALIKAAPQS	ORF_OK	TRUE_HIT	mmkgwikcglagavvllasfwggsvraagislkqvsgpvyvvednyyvkensmvyfgakgvtvvgatwtpdtarelhklikrvsskpvlevintnyhtdraggnaywksigakvvatrqtrdlmksdwaeivaftrkglpeypdlplvlpnvvhdgdftlqegkvralyagpahtpdgifvyfpdeqvlygncilkeklgnlsfadvkaypktlerlkalklpiktvigghdsplhgpelidhyealikaaaks	MMKGWIKCGLAGAVVLMASFWGGSVRAAGMSLTQVSGPVYVVEDNYYVQENSMVYFGAEGVTVVGATWTPDTARELHKLIKRVSSKPVLEVINTNYHTDRAGGNAYWKSIGAKVVSTRQTRDLMKSDWAEIVAFTRKGLPDYPDLPLVLPNVVHEGDFTLQGGKLRAFYAGPAHTPDGIFVYFPDQQVLYGNCILKEKLGNLSFADVKAYPQTLERLRAMKLPIKTVVGGHDSPLHGPELIDHYEALIKAAPQS	1	254	99.6063	0	0	0	253	Cluster_4	ChpA_family_subclass_B2_metallo-beta-lactamase_ImiS_NG_050415.1_cds_WP_063865298.1_1	Cluster_4	SP_Sec_SPI_	26-27	SP_Sec_SPI_	26-27	N_Y_H_T_D	C	H	.	.
B2_1205	GCF_001705915.1	644	644	Aeromonas_hydrophila	Bacteria-Pseudomonadota-Gammaproteobacteria-Aeromonadales-Aeromonadaceae-Aeromonas-	4882939	NZ_LYZG01000005.1	class_B2	538.5	+	242361	243120	242362	243123	ATGAAAGGTTGGATAAAGTGCGGATTGGCCGGCGCCGTGGTGCTGATGGCGAGTTTCTGGGGGGGCAGCGTGCGGGCGGCGGGGATGTCGCTGACGCAGGTGAGCGGCCCGGTTTATGTGGTAGAGGACAATTACTACGTGCAGGAAAACTCCATGGTCTATTTCGGGGCCGAGGGAGTGACTGTGGTAGGGGCGACCTGGACGCCGGATACCGCCCGCGAGCTGCACAAGCTGATCAAACGGGTCAGCAGCAAGCCGGTGCTGGAGGTGATCAACACCAACTACCACACCGACCGGGCGGGCGGTAATGCCTACTGGAAGTCCATCGGGGCCAAGGTGGTATCGACCCGCCAGACCCGGGACCTGATGAAGAGTGACTGGGCCGAGATCGTCGCCTTT…	WP_043125254.1	CphA_family_subclass_B2_metallo-beta-lactamase	MKGWIKCGLAGAVVLMASFWGGSVRAAGMSLTQVSGPVYVVEDNYYVQENSMVYFGAEGVTVVGATWTPDTARELHKLIKRVSSKPVLEVINTNYHTDRAGGNAYWKSIGAKVVSTRQTRDLMKSDWAEIVAFTRKGLPDYPDLPLVLPNVVHEGDFTLQGGKLRAFYAGPAHTPDGIFVYFPDQQVLYGNCILKEKLGNLSFADVKAYPQTLERLRAMKLPIKTVVGGHDSPLHGPELIDHYEALIKAAPQS	ORF_OK	TRUE_HIT	mmkgwikcglagavvllasfwggsvraagislkqvsgpvyvvednyyvkensmvyfgakgvtvvgatwtpdtarelhklikrvsskpvlevintnyhtdraggnaywksigakvvatrqtrdlmksdwaeivaftrkglpeypdlplvlpnvvhdgdftlqegkvralyagpahtpdgifvyfpdeqvlygncilkeklgnlsfadvkaypktlerlkalklpiktvigghdsplhgpelidhyealikaaaks	MMKGWIKCGLAGAVVLMASFWGGSVRAAGMSLTQVSGPVYVVEDNYYVQENSMVYFGAEGVTVVGATWTPDTARELHKLIKRVSSKPVLEVINTNYHTDRAGGNAYWKSIGAKVVSTRQTRDLMKSDWAEIVAFTRKGLPDYPDLPLVLPNVVHEGDFTLQGGKLRAFYAGPAHTPDGIFVYFPDQQVLYGNCILKEKLGNLSFADVKAYPQTLERLRAMKLPIKTVVGGHDSPLHGPELIDHYEALIKAAPQS	1	254	99.6063	0	0	0	253	Cluster_4	ChpA_family_subclass_B2_metallo-beta-lactamase_ImiS_NG_050415.1_cds_WP_063865298.1_1	Cluster_4	SP_Sec_SPI_	26-27	SP_Sec_SPI_	26-27	N_Y_H_T_D	C	H	.	.
B2_1206	GCF_001705945.1	644	644	Aeromonas_hydrophila	Bacteria-Pseudomonadota-Gammaproteobacteria-Aeromonadales-Aeromonadaceae-Aeromonas-	4973555	NZ_LYZH01000003.1	class_B2	544.3	+	456024	456783	456022	456786	ATGATGAAAGGTTGGATGAAGTGCGGGTTGGCCGGGGCCGTGGTGCTGATGGCGAGTTTCTGGGGTGGCAGCGTGCGGGCGGCAGGGATCTCCCTCAAGCAGGTGAGCGGCCCGGTCTATGTGGTGGAGGACAACTACTACGTCAAAGAGAACTCCATGGTCTATTTCGGGGCCAAGGGGGTGACTGTGGTGGGGGCGACCTGGACGCCGGATACCGCCCGCGAGCTGCACAAGCTGATCAAACGGGTCAGCAGCAAGCCGGTGCTGGAGGTGATCAACACCAACTACCACACCGACCGGGCGGGCGGTAACGCCTACTGGAAGTCCATCGGGGCCAAGGTGGTGGCGACACGCCAGACCCGGGATCTGATGAAGAGCGACTGGGCCGAGATTGTCGCC…	WP_080644389.1	CphA_family_subclass_B2_metallo-beta-lactamase	MMKGWMKCGLAGAVVLMASFWGGSVRAAGISLKQVSGPVYVVEDNYYVKENSMVYFGAKGVTVVGATWTPDTARELHKLIKRVSSKPVLEVINTNYHTDRAGGNAYWKSIGAKVVATRQTRDLMKSDWAEIVAFTRKGLPEYPDLPLVLPNVVHDGDFTLQEGKVRAFYAGPAHTPDGIFVYFPDEQVLYGNCILKEKLGNLSFANVKAYPQTIERLKAMKLPIKTVIGGHDSPLHGPELIDHYEELIKAVPQS	ORF_OK	TRUE_HIT	mmkgwikcglagavvllasfwggsvraagislkqvsgpvyvvednyyvkensmvyfgakgvtvvgatwtpdtarelhklikrvsskpvlevintnyhtdraggnaywksigakvvatrqtrdlmksdwaeivaftrkglpeypdlplvlpnvvhdgdftlqegkvralyagpahtpdgifvyfpdeqvlygncilkeklgnlsfadvkaypktlerlkalklpiktvigghdsplhgpelidhyealikaaaks	MMKGWMKCGLAGAVVLMASFWGGSVRAAGISLKQVSGPVYVVEDNYYVKENSMVYFGAKGVTVVGATWTPDTARELHKLIKRVSSKPVLEVINTNYHTDRAGGNAYWKSIGAKVVATRQTRDLMKSDWAEIVAFTRKGLPEYPDLPLVLPNVVHDGDFTLQEGKVRAFYAGPAHTPDGIFVYFPDEQVLYGNCILKEKLGNLSFANVKAYPQTIERLKAMKLPIKTVIGGHDSPLHGPELIDHYEELIKAVPQS	1	254	99.6063	0	0	0	254	Cluster_4	ChpA_family_subclass_B2_metallo-beta-lactamase_ImiS_NG_050415.1_cds_WP_063865298.1_1	Cluster_4	SP_Sec_SPI_	27-28	SP_Sec_SPI_	27-28	N_Y_H_T_D	C	H	.	.
B2_1207	GCF_001717755.1	644	644	Aeromonas_hydrophila	Bacteria-Pseudomonadota-Gammaproteobacteria-Aeromonadales-Aeromonadaceae-Aeromonas-	5086886	NZ_LXME01000032.1	class_B2	545.2	-	14160	14919	14158	14922	ATGATGAAAGGTTGGATGAAGTGCGGGTTGGCCGGGGCCGTGGTGCTGATGGCGAGTTTCTGGGGTGGCAGCGTGCGGGCGGCAGGGATCTCCCTCAAGCAGGTGAGCGGCCCGGTCTATGTGGTGGAGGACAACTACTACGTCAAAGAGAACTCCATGGTCTATTTCGGGGCCAAGGGGGTGACTGTGGTGGGGGCGACCTGGACGCCGGATACCGCCCGCGAGCTGCACAAGCTGATCAAACGGGTCAGCAGCAAGCCGGTGCTGGAGGTGATCAACACCAACTACCACACCGACCGGGCGGGCGGTAACGCCTACTGGAAGTCCATCGGGGCCAAGGTGGTGGCGACACGCCAGACCCGGGATCTGATGAAGAGCGACTGGGCCGAGATTGTCGCC…	WP_080644389.1	CphA_family_subclass_B2_metallo-beta-lactamase	MMKGWMKCGLAGAVVLMASFWGGSVRAAGISLKQVSGPVYVVEDNYYVKENSMVYFGAKGVTVVGATWTPDTARELHKLIKRVSSKPVLEVINTNYHTDRAGGNAYWKSIGAKVVATRQTRDLMKSDWAEIVAFTRKGLPEYPDLPLVLPNVVHDGDFTLQEGKVRAFYAGPAHTPDGIFVYFPDEQVLYGNCILKEKLGNLSFANVKAYPQTIERLKAMKLPIKTVIGGHDSPLHGPELIDHYEELIKAVPQS	ORF_OK	TRUE_HIT	mmkgwikcglagavvllasfwggsvraagislkqvsgpvyvvednyyvkensmvyfgakgvtvvgatwtpdtarelhklikrvsskpvlevintnyhtdraggnaywksigakvvatrqtrdlmksdwaeivaftrkglpeypdlplvlpnvvhdgdftlqegkvralyagpahtpdgifvyfpdeqvlygncilkeklgnlsfadvkaypktlerlkalklpiktvigghdsplhgpelidhyealikaaaks	MMKGWMKCGLAGAVVLMASFWGGSVRAAGISLKQVSGPVYVVEDNYYVKENSMVYFGAKGVTVVGATWTPDTARELHKLIKRVSSKPVLEVINTNYHTDRAGGNAYWKSIGAKVVATRQTRDLMKSDWAEIVAFTRKGLPEYPDLPLVLPNVVHDGDFTLQEGKVRAFYAGPAHTPDGIFVYFPDEQVLYGNCILKEKLGNLSFANVKAYPQTIERLKAMKLPIKTVIGGHDSPLHGPELIDHYEELIKAVPQS	1	254	99.6063	0	0	0	254	Cluster_4	ChpA_family_subclass_B2_metallo-beta-lactamase_ImiS_NG_050415.1_cds_WP_063865298.1_1	Cluster_4	SP_Sec_SPI_	27-28	SP_Sec_SPI_	27-28	N_Y_H_T_D	C	H	.	.
B2_1208	GCF_001728955.1	1535548	1535548	Aeromonas_sp_DNP9	Bacteria-Pseudomonadota-Gammaproteobacteria-Aeromonadales-Aeromonadaceae-Aeromonas-unclassified_Aeromonas-	4662933	NZ_LYSQ01000010.1	class_B2	544.7	+	132896	133655	132894	133658	ATGATGAAAGGTTGGATGAAGTGCGGCTTGGCCGGGGCTGTGGTGCTGATGGCGAGTTTCTGGGGTGGCAGCGTGCGGGCGGCAGGGATCTCCCTCAAGCAGGTGAGCGGCCCTGTCTATGTTGTTGAAGATAACTACTACGTCAAAGAGAACTCCATGGTCTATTTCGGGGCCAAGGGGGTGACGGTGGTGGGGGCGACCTGGACGCCGGATACCGCTCGCGAGCTGCACAAGCTGATCAAACGGGTCAGCAGCAAGCCGGTGCTGGAGGTGATCAATACCAACTACCACACCGATCGGGCGGGCGGTAACGCCTACTGGAAGTCCATCGGGGCCAAGGTGGTGGCGACGCGCCAGACCCGGGATCTGATGAAGAGCGACTGGGCCGAGATTGTCGCC…	WP_083243760.1	CphA_family_subclass_B2_metallo-beta-lactamase	MMKGWMKCGLAGAVVLMASFWGGSVRAAGISLKQVSGPVYVVEDNYYVKENSMVYFGAKGVTVVGATWTPDTARELHKLIKRVSSKPVLEVINTNYHTDRAGGNAYWKSIGAKVVATRQTRDLMKSDWAEIVAFTRKGLPEYPDLPLVLPNVVHDGDFKLQDGKVRAFYAGPAHTPDGIFVYFPDEQVLYGNCILKEKLGNLSFANVKEYPQTIERLKAMKLPIKTVIGGHDSPLHGPELIDHYEELIKAVPQS	ORF_OK	TRUE_HIT	mmkgwikcglagavvllasfwggsvraagislkqvsgpvyvvednyyvkensmvyfgakgvtvvgatwtpdtarelhklikrvsskpvlevintnyhtdraggnaywksigakvvatrqtrdlmksdwaeivaftrkglpeypdlplvlpnvvhdgdftlqegkvralyagpahtpdgifvyfpdeqvlygncilkeklgnlsfadvkaypktlerlkalklpiktvigghdsplhgpelidhyealikaaaks	MMKGWMKCGLAGAVVLMASFWGGSVRAAGISLKQVSGPVYVVEDNYYVKENSMVYFGAKGVTVVGATWTPDTARELHKLIKRVSSKPVLEVINTNYHTDRAGGNAYWKSIGAKVVATRQTRDLMKSDWAEIVAFTRKGLPEYPDLPLVLPNVVHDGDFKLQDGKVRAFYAGPAHTPDGIFVYFPDEQVLYGNCILKEKLGNLSFANVKEYPQTIERLKAMKLPIKTVIGGHDSPLHGPELIDHYEELIKAVPQS	1	254	99.6063	0	0	0	254	Cluster_4	ChpA_family_subclass_B2_metallo-beta-lactamase_ImiS_NG_050415.1_cds_WP_063865298.1_1	Cluster_4	SP_Sec_SPI_	27-28	SP_Sec_SPI_	27-28	N_Y_H_T_D	C	H	.	.
B2_121	GCF_009208775.1	2499159	2499159	Silvanigrella_paludirubra	Bacteria-Bdellovibrionota-Oligoflexia-Silvanigrellales-Silvanigrellaceae-Silvanigrella-	3941129	NZ_WFLM01000004.1	class_B2	361.3	-	105319	106051	105299	106063	ATGATTTATAAAAATATTAAAGTTTATTTCTCTTCTTTATGCTGTATTTTTTTTACATCTGAGTCATTTTCTGCTGAACTTTCCCTCAAACATTTAAAGGGCCCTTTATATGTTGTTGAGGATGATTATTTTTATAAAGAAAACTCAATGGTCTATGTTGGAGAAAAATATATAACTATCATAGGTGCTACATGGACATCGGATACAGCCTTACTTTTGGACAAAGAATTAAAAAAAATAAGTAAAAAACCTATTAAAGAAGTGATTAATACAAATTATCATCCAGACCGCGCTGGTGGTAATGATTATTGGAAAAAAATAGGTGCTAAAATTATTTCAACCCAAATGACATATGATTTAATGAAATCAGATTGGGATAATTCGGTTGAATTTACCAAA…	WP_153420724.1	subclass_B2_metallo-beta-lactamase	MIYKNIKVYFSSLCCIFFTSESFSAELSLKHLKGPLYVVEDDYFYKENSMVYVGEKYITIIGATWTSDTALLLDKELKKISKKPIKEVINTNYHPDRAGGNDYWKKIGAKIISTQMTYDLMKSDWDNSVEFTKKSIPDYPRMPLSLPDKVYKNDIVLQNGAIKSIYTGPSHTHDGIFVYFPKEEVLYGNCIIKEKLGNLSFADVKEYPKTIEKLKNLNLKITQVIGGHDGAIHGPELIDSYKKLIDDHNKNNKE	ORF_OK	TRUE_HIT	gwikcglagavvllasfwggsvraagislkqvsgpvyvvednyyvkensmvyfgakgvtvvgatwtpdtarelhklikrvsskpvlevintnyhtdraggnaywksigakvvatrqtrdlmksdwaeivaftrkglpeypdlplvlpnvvhdgdftlqegkvralyagpahtpdgifvyfpdeqvlygncilkeklgnlsfadvkaypktlerlkalklpiktvigghdsplhgpelidhyealikaa	KNIKVYFSSLCC--IFFTSESF-SAELSLKHLKGPLYVVEDDYFYKENSMVYVGEKYITIIGATWTSDTALLLDKELKKISKKPIKEVINTNYHPDRAGGNDYWKKIGAKIISTQMTYDLMKSDWDNSVEFTKKSIPDYPRMPLSLPDKVYKNDIVLQNGAIKSIYTGPSHTHDGIFVYFPKEEVLYGNCIIKEKLGNLSFADVKEYPKTIEKLKNLNLKITQVIGGHDGAIHGPELIDSYKKLIDDH	4	251	97.2441	0	3	0	254	Cluster_5	CLUSTER_NOT_IN_NCBI_AMR_REF_DB	Cluster_5	SP_Sec_SPI_	24-25	SP_Sec_SPI_	24-25	N_Y_H_P_D	C	S	.	.
B2_1211	GCF_001756325.1	644	644	Aeromonas_hydrophila	Bacteria-Pseudomonadota-Gammaproteobacteria-Aeromonadales-Aeromonadaceae-Aeromonas-	4973054	NZ_MAKI01000008.1	class_B2	542.6	-	7180	7939	7178	7939	ATGAAAGGTTGGATAAAGTGCGGATTGGCCGGGGCCGTGGTGCTGATGGCGAGTTTCTGGGGCGGCAGCGTACGGGCGGCGGGGATGTCGCTGACGCAGGTGAGCGGCCCTGTCTACGTTGTCGAAGATAACTACTATGTACAGGAAAATTCCATGGTCTATTTCGGGGCCAAGGGGGTGACGGTGGTGGGGGCGACCTGGACGCCGGACACCGCCCGCGAGCTGCACAAGCTGATCAAACGGGTCAGCCGCAAGCCGGTGCTGGAGGTGATCAACACCAACTACCACACCGACCGGGCGGGCGGTAACGCCTACTGGAAGTCCATCGGTGCCAAGGTGGTATCGACCCGCCAGACCCGGGATCTGATGAAGAGCGACTGGGCCGAGATTGTCGCCTTT…	WP_039214207.1	CphA_family_subclass_B2_metallo-beta-lactamase	MKGWIKCGLAGAVVLMASFWGGSVRAAGMSLTQVSGPVYVVEDNYYVQENSMVYFGAKGVTVVGATWTPDTARELHKLIKRVSRKPVLEVINTNYHTDRAGGNAYWKSIGAKVVSTRQTRDLMKSDWAEIVAFTRKGLPEYPDLPLVLPNVVLDGDFTLQEGKLRAFYAGPAHTPDGIFVYFPDEQVLYGNCILKEKLGNLSFANVKAYPQTIERLKAMKLPIKTVVGGHDSPLHGPELIDHYEALIKAAPQS	ORF_OK	TRUE_HIT	mmkgwikcglagavvllasfwggsvraagislkqvsgpvyvvednyyvkensmvyfgakgvtvvgatwtpdtarelhklikrvsskpvlevintnyhtdraggnaywksigakvvatrqtrdlmksdwaeivaftrkglpeypdlplvlpnvvhdgdftlqegkvralyagpahtpdgifvyfpdeqvlygncilkeklgnlsfadvkaypktlerlkalklpiktvigghdsplhgpelidhyealikaaaks	MMKGWIKCGLAGAVVLMASFWGGSVRAAGMSLTQVSGPVYVVEDNYYVQENSMVYFGAKGVTVVGATWTPDTARELHKLIKRVSRKPVLEVINTNYHTDRAGGNAYWKSIGAKVVSTRQTRDLMKSDWAEIVAFTRKGLPEYPDLPLVLPNVVLDGDFTLQEGKLRAFYAGPAHTPDGIFVYFPDEQVLYGNCILKEKLGNLSFANVKAYPQTIERLKAMKLPIKTVVGGHDSPLHGPELIDHYEALIKAAPQS	1	254	99.6063	0	0	0	253	Cluster_4	ChpA_family_subclass_B2_metallo-beta-lactamase_ImiS_NG_050415.1_cds_WP_063865298.1_1	Cluster_4	SP_Sec_SPI_	26-27	SP_Sec_SPI_	26-27	N_Y_H_T_D	C	H	.	.
B2_1212	GCF_001756345.1	644	644	Aeromonas_hydrophila	Bacteria-Pseudomonadota-Gammaproteobacteria-Aeromonadales-Aeromonadaceae-Aeromonas-	4960907	NZ_MAKJ01000157.1	class_B2	546.5	-	7179	7938	7177	7938	ATGAAAGGTTGGATAAAGTGCGGATTGGCCGGGGCCGTGGTGCTGATGGCGAGTTTCTGGGGCGGCAGCGTACGGGCGGCGGGGATGTCGCTGACGCAGGTGAGCGGCCCTGTCTACGTTGTCGAAGATAACTACTATGTACAGGAAAATTCCATGGTCTATTTCGGGGCCAAGGGGGTGACGGTGGTGGGGGCGACCTGGACGCCGGACACCGCCCGCGAGCTGCACAAGCTGATCAAACGGGTCAGCCGCAAGCCGGTGCTGGAGGTGATCAACACCAACTACCACACCGACCGGGCGGGCGGTAACGCCTACTGGAAGTCCATCGGTGCCAAGGTGGTATCGACCCGCCAGACCCGGGATCTGATGAAGAGCGACTGGGCCGAGATTGTCGCCTTT…	WP_039214207.1	CphA_family_subclass_B2_metallo-beta-lactamase	MKGWIKCGLAGAVVLMASFWGGSVRAAGMSLTQVSGPVYVVEDNYYVQENSMVYFGAKGVTVVGATWTPDTARELHKLIKRVSRKPVLEVINTNYHTDRAGGNAYWKSIGAKVVSTRQTRDLMKSDWAEIVAFTRKGLPEYPDLPLVLPNVVLDGDFTLQEGKLRAFYAGPAHTPDGIFVYFPDEQVLYGNCILKEKLGNLSFANVKAYPQTIERLKAMKLPIKTVVGGHDSPLHGPELIDHYEALIKAAPQS	ORF_OK	TRUE_HIT	mmkgwikcglagavvllasfwggsvraagislkqvsgpvyvvednyyvkensmvyfgakgvtvvgatwtpdtarelhklikrvsskpvlevintnyhtdraggnaywksigakvvatrqtrdlmksdwaeivaftrkglpeypdlplvlpnvvhdgdftlqegkvralyagpahtpdgifvyfpdeqvlygncilkeklgnlsfadvkaypktlerlkalklpiktvigghdsplhgpelidhyealikaaaks	MMKGWIKCGLAGAVVLMASFWGGSVRAAGMSLTQVSGPVYVVEDNYYVQENSMVYFGAKGVTVVGATWTPDTARELHKLIKRVSRKPVLEVINTNYHTDRAGGNAYWKSIGAKVVSTRQTRDLMKSDWAEIVAFTRKGLPEYPDLPLVLPNVVLDGDFTLQEGKLRAFYAGPAHTPDGIFVYFPDEQVLYGNCILKEKLGNLSFANVKAYPQTIERLKAMKLPIKTVVGGHDSPLHGPELIDHYEALIKAAPQS	1	254	99.6063	0	0	0	253	Cluster_4	ChpA_family_subclass_B2_metallo-beta-lactamase_ImiS_NG_050415.1_cds_WP_063865298.1_1	Cluster_4	SP_Sec_SPI_	26-27	SP_Sec_SPI_	26-27	N_Y_H_T_D	C	H	.	.
B2_1213	GCF_001855275.1	1108595	1108595	Chromobacterium_vaccinii	Bacteria-Pseudomonadota-Betaproteobacteria-Neisseriales-Chromobacteriaceae-Chromobacterium-	5041230	NZ_CP017707.1	class_B2	355.1	-	1439737	1440469	1439708	1440481	ATGCACAGAATATTTAAATTTGCCGGCGCGATGCTGGGCCTGGCGCTGGCGGCCGGGGCCTGCGCGGCGCAGGGCAGCCTGAGCCTCAAGCACCTGAAGGGCGGCGTGTACGTGGTGGAAGACGACTATTACGCCAAGGAGAACTCGGCGGTATACGTCGGCGCGGAGCATGTGACCGTGGTGGGCGCCACCTGGACGCCGGACACCGCCCGCGAGCTGGCGCGGCAAATACGCGCGGTCACCGACAAGCCCATCGCCGAGGTGATCAATCCCAACTATCACACCGACCGGGCCGGCGGCAACGCGTACTGGAAGTCGATCGGCGCCCGCATCGTCGCCACCCGGCAGACGGTCGACGAGATGAGCCGCGGCTGGGACGACATCGTCGCTTTTACCCGG…	WP_235429325.1	subclass_B2_metallo-beta-lactamase	MHRIFKFAGAMLGLALAAGACAAQGSLSLKHLKGGVYVVEDDYYAKENSAVYVGAEHVTVVGATWTPDTARELARQIRAVTDKPIAEVINPNYHTDRAGGNAYWKSIGARIVATRQTVDEMSRGWDDIVAFTRQGFPDYPALPASMPDRVFPGDFELQGGKVKAFHLGAAHTRDGIFVYFPEEKVLYGNCILKQELGNLHYADLNEYPKTLDRLALSGLDIDTVIAGHLDALHGPELIDHYRQLLRRQASDAAAQAR	ORF_OK	TRUE_HIT	kcglagavvllasfwggsvraagislkqvsgpvyvvednyyvkensmvyfgakgvtvvgatwtpdtarelhklikrvsskpvlevintnyhtdraggnaywksigakvvatrqtrdlmksdwaeivaftrkglpeypdlplvlpnvvhdgdftlqegkvralyagpahtpdgifvyfpdeqvlygncilkeklgnlsfadvkaypktlerlkalklpiktvigghdsplhgpelidhyealikaa	IFKFAGAMLGLALAAGACAAQGSLSLKHLKGGVYVVEDDYYAKENSAVYVGAEHVTVVGATWTPDTARELARQIRAVTDKPIAEVINPNYHTDRAGGNAYWKSIGARIVATRQTVDEMSRGWDDIVAFTRQGFPDYPALPASMPDRVFPGDFELQGGKVKAFHLGAAHTRDGIFVYFPEEKVLYGNCILKQELGNLHYADLNEYPKTLDRLALSGLDIDTVIAGHLDALHGPELIDHYRQLLRRQ	7	251	96.063	0	0	0	257	Cluster_2	CLUSTER_NOT_IN_NCBI_AMR_REF_DB	Cluster_2	LIPO_Sec_SPII_	20-21	LIPO_Sec_SPII_	20-21	N_Y_H_T_D	C	H	.	.
B2_1214	GCF_001855565.1	1382803	1382803	Chromobacterium_amazonense	Bacteria-Pseudomonadota-Betaproteobacteria-Neisseriales-Chromobacteriaceae-Chromobacterium-	4010194	NZ_MKCR01000005.1	class_B2	369.2	+	38751	39474	38719	39480	ATGCACAAAATATTCAAGATGGGCGGCCGCCTGGCTGCATGGGCTGTGGCTTTGGTCTGGGCCGCGACGGCTGGCGCCGCGGAAGGCAAGATGGCGTTGAAGCAAGTGCGCGGCGGCGTTTATGTGGCGGAAGACAGCCACTACGCGCGAGAGAATTCGGTGGTGTACATCGGCAGCGCGCACGTGACCGTGGTGGGGGCGACCTGGACGCCGGATACCGCGCGCGAACTGGCCGGGCAAATCCGCCGCGTGACCGATAAGCCGATCACGGAGGTGATCAATACCAACTACCATACCGATCGCGCCGGCGGCAACGCCTACTGGAAGAGCATAGGCGCGCGCATCGTGTCCACTCGGCTGACGGCGGATGAGATGCGCGCCGGCTGGGATGAGGTGGTC…	WP_244886564.1	subclass_B2_metallo-beta-lactamase	MHKIFKMGGRLAAWAVALVWAATAGAAEGKMALKQVRGGVYVAEDSHYARENSVVYIGSAHVTVVGATWTPDTARELAGQIRRVTDKPITEVINTNYHTDRAGGNAYWKSIGARIVSTRLTADEMRAGWDEVVAFTRQGFPDYPSLPLVLPDQVFAGDFSLQNDRVRAFYLGPAHTKDGIFVYFPQEKVLYGNCILKPELGNMRYADLAEYPKTLEKLKALHLDVDTVIAGHQDAEHGPELIDRYLALLHAAQ	ORF_OK	TRUE_HIT	lagavvllasfwggsvraagislkqvsgpvyvvednyyvkensmvyfgakgvtvvgatwtpdtarelhklikrvsskpvlevintnyhtdraggnaywksigakvvatrqtrdlmksdwaeivaftrkglpeypdlplvlpnvvhdgdftlqegkvralyagpahtpdgifvyfpdeqvlygncilkeklgnlsfadvkaypktlerlkalklpiktvigghdsplhgpelidhyealikaa	LAAWAVALVWAATAGAAEGKMALKQVRGGVYVAEDSHYARENSVVYIGSAHVTVVGATWTPDTARELAGQIRRVTDKPITEVINTNYHTDRAGGNAYWKSIGARIVSTRLTADEMRAGWDEVVAFTRQGFPDYPSLPLVLPDQVFAGDFSLQNDRVRAFYLGPAHTKDGIFVYFPQEKVLYGNCILKPELGNMRYADLAEYPKTLEKLKALHLDVDTVIAGHQDAEHGPELIDRYLALLHAA	10	251	94.8819	0	0	0	253	Cluster_6	CLUSTER_NOT_IN_NCBI_AMR_REF_DB	Cluster_6	SP_Sec_SPI_	26-27	SP_Sec_SPI_	26-27	N_Y_H_T_D	C	R	.	.
B2_1215	GCF_001858225.1	646	646	Aeromonas_sobria	Bacteria-Pseudomonadota-Gammaproteobacteria-Aeromonadales-Aeromonadaceae-Aeromonas-	4691251	NZ_KV861289.1	class_B2	548.4	-	12284	13043	12282	13043	ATGAAAGGTTGGATAAAGTGCACATTGGCCGGGGCCGTGGTGCTGATGGCGAGTTTCTGGGGTGGCAGCGTGCGGGCGGCGGGGATGTCGCTGATGCAGGTGAGCGGCCCTGTCTATGTTGTTGAAGATAACTACTACGTCAAAGAGAACTCCATGGTCTATTTCGGGGCCAAGGGGGTGACGGTGGTGGGGGCGACCTGGACGCCGGATACCGCCCGCGAGCTGCACAAGCTGATCAAACGGGTCAGCAGCAAACCGGTGCTGGAGGTGATCAACACCAACTACCACACCGACCGAGCGGGCGGTAACGCCTACTGGAAGTCCATCGGGGCCAAGGTGGTATCGACTCGCCAGACCCGGGATCTGATGAAGAGCGACTGGGCCGAGATTGTCGCCTTT…	WP_042021466.1	CphA_family_subclass_B2_metallo-beta-lactamase	MKGWIKCTLAGAVVLMASFWGGSVRAAGMSLMQVSGPVYVVEDNYYVKENSMVYFGAKGVTVVGATWTPDTARELHKLIKRVSSKPVLEVINTNYHTDRAGGNAYWKSIGAKVVSTRQTRDLMKSDWAEIVAFTRKGLPEYPDLPLVLPNVVHDGDFKLQEGKVRAFYAGPAHTPDGIFVYFPDQQVLYGNCILKEKLGNLSFANVKEYPQTIERLKAMKLPIKTVIGGHDSPLHGPELIDHYEELIKAAPQS	ORF_OK	TRUE_HIT	mmkgwikcglagavvllasfwggsvraagislkqvsgpvyvvednyyvkensmvyfgakgvtvvgatwtpdtarelhklikrvsskpvlevintnyhtdraggnaywksigakvvatrqtrdlmksdwaeivaftrkglpeypdlplvlpnvvhdgdftlqegkvralyagpahtpdgifvyfpdeqvlygncilkeklgnlsfadvkaypktlerlkalklpiktvigghdsplhgpelidhyealikaaaks	MMKGWIKCTLAGAVVLMASFWGGSVRAAGMSLMQVSGPVYVVEDNYYVKENSMVYFGAKGVTVVGATWTPDTARELHKLIKRVSSKPVLEVINTNYHTDRAGGNAYWKSIGAKVVSTRQTRDLMKSDWAEIVAFTRKGLPEYPDLPLVLPNVVHDGDFKLQEGKVRAFYAGPAHTPDGIFVYFPDQQVLYGNCILKEKLGNLSFANVKEYPQTIERLKAMKLPIKTVIGGHDSPLHGPELIDHYEELIKAAPQS	1	254	99.6063	0	0	0	253	Cluster_4	ChpA_family_subclass_B2_metallo-beta-lactamase_ImiS_NG_050415.1_cds_WP_063865298.1_1	Cluster_4	SP_Sec_SPI_	26-27	SP_Sec_SPI_	26-27	N_Y_H_T_D	C	H	.	.
B2_1216	GCF_001887375.1	1519205	1519205	Aeromonas_sp_SCS5	Bacteria-Pseudomonadota-Gammaproteobacteria-Aeromonadales-Aeromonadaceae-Aeromonas-unclassified_Aeromonas-	4428764	NZ_LFCS01000007.1	class_B2	546.3	+	347004	347763	347002	347766	ATGATGAAAGGTTGGATGAAGTGCGGATTGGCCGGGGCCGTGGTGCTGATGGCGAGTTTCTGGGGTGGCAGCGTGCGGGCGGCGGGGATCTCCCTCAAGCAGGTAAGTGGCCCTGTCTATGTGGTGGAGGACAACTACTACGTCAAAGAGAACTCCATGGTCTATTTCGGGGCCAAGGGGGTGACGGTGGTGGGGGCGACCTGGACGCCGGATACCGCCCGCGAGCTGCACAAGCTCATTAAACGGGTCAGCAGCAAGCCGGTGCTGGAGGTGATCAACACCAACTACCATACCGATCGGGCGGGTGGTAACGCCTACTGGAAGTCCATCGGGGCCAAGGTGGTGGCGACACGCCAGACCCGGGATCTGATGAAGAGCGACTGGGCCGAGATTGTCGCC…	WP_081849377.1	CphA_family_subclass_B2_metallo-beta-lactamase	MMKGWMKCGLAGAVVLMASFWGGSVRAAGISLKQVSGPVYVVEDNYYVKENSMVYFGAKGVTVVGATWTPDTARELHKLIKRVSSKPVLEVINTNYHTDRAGGNAYWKSIGAKVVATRQTRDLMKSDWAEIVAFTRKGLPEYPDLPLVLPNVVHDGDFTLQEGKVRAFYAGPAHTPDGIFVYFPDEQVLYGNCILKEKLGNLSFANVKEYPQTIERLKAMKLPIKTVIGGHDSPLHGPELIDHYEELIKAAPQS	ORF_OK	TRUE_HIT	mmkgwikcglagavvllasfwggsvraagislkqvsgpvyvvednyyvkensmvyfgakgvtvvgatwtpdtarelhklikrvsskpvlevintnyhtdraggnaywksigakvvatrqtrdlmksdwaeivaftrkglpeypdlplvlpnvvhdgdftlqegkvralyagpahtpdgifvyfpdeqvlygncilkeklgnlsfadvkaypktlerlkalklpiktvigghdsplhgpelidhyealikaaaks	MMKGWMKCGLAGAVVLMASFWGGSVRAAGISLKQVSGPVYVVEDNYYVKENSMVYFGAKGVTVVGATWTPDTARELHKLIKRVSSKPVLEVINTNYHTDRAGGNAYWKSIGAKVVATRQTRDLMKSDWAEIVAFTRKGLPEYPDLPLVLPNVVHDGDFTLQEGKVRAFYAGPAHTPDGIFVYFPDEQVLYGNCILKEKLGNLSFANVKEYPQTIERLKAMKLPIKTVIGGHDSPLHGPELIDHYEELIKAAPQS	1	254	99.6063	0	0	0	254	Cluster_4	ChpA_family_subclass_B2_metallo-beta-lactamase_ImiS_NG_050415.1_cds_WP_063865298.1_1	Cluster_4	SP_Sec_SPI_	27-28	SP_Sec_SPI_	27-28	N_Y_H_T_D	C	H	.	.
B2_1217	GCF_001895965.1	644	644	Aeromonas_hydrophila	Bacteria-Pseudomonadota-Gammaproteobacteria-Aeromonadales-Aeromonadaceae-Aeromonas-	4783504	NZ_CP018201.1	class_B2	534.5	+	753823	754582	753824	754585	ATGAAGGGTTGGATAAAGTGCGGGCTGGCCGGGGCCGTGGTGCTGACGGCGAGTTTCTGGGGTGGCAGCGTGCGGGCGGCGGGGATCTCCCTCAAGCAGGTGAGCGGCCCTGTGTATGTGGTGGAGGACAACTACTACGTCAAAGAGAACTCCATGGTCTATTTCGGGACCAAGGGAGTGACTGTGGTGGGGGCGACCTGGACGCCGGATACCGCCCGAGAGCTGCACAAGCTGATCAAACGGGTCAGCCGCAAGCCGGTGCTGGAGGTGATCAACACCAACTACCACACCGACCGGGCGGGCGGTAACGCCTACTGGAAGTCCATCGGTGCCAAGGTGGTGGCGACCCGCCAGACCCGGGATCTGATGAAGAGCGACTGGGTCGAGATCGTCGCCTTT…	WP_073348889.1	CphA_family_subclass_B2_metallo-beta-lactamase	MKGWIKCGLAGAVVLTASFWGGSVRAAGISLKQVSGPVYVVEDNYYVKENSMVYFGTKGVTVVGATWTPDTARELHKLIKRVSRKPVLEVINTNYHTDRAGGNAYWKSIGAKVVATRQTRDLMKSDWVEIVAFTRKGLPEYPDLPLVLPNVVHDGDFTLQEGKLRAFYAGPAHTPDGIFVYFPDEQVLYGNCILKEKLGNLSFADVKAYPQTLERLKAMKLPIKTVVGGHDSPLHGPELIDHYEALIKAAPQS	ORF_OK	TRUE_HIT	mmkgwikcglagavvllasfwggsvraagislkqvsgpvyvvednyyvkensmvyfgakgvtvvgatwtpdtarelhklikrvsskpvlevintnyhtdraggnaywksigakvvatrqtrdlmksdwaeivaftrkglpeypdlplvlpnvvhdgdftlqegkvralyagpahtpdgifvyfpdeqvlygncilkeklgnlsfadvkaypktlerlkalklpiktvigghdsplhgpelidhyealikaaaks	MMKGWIKCGLAGAVVLTASFWGGSVRAAGISLKQVSGPVYVVEDNYYVKENSMVYFGTKGVTVVGATWTPDTARELHKLIKRVSRKPVLEVINTNYHTDRAGGNAYWKSIGAKVVATRQTRDLMKSDWVEIVAFTRKGLPEYPDLPLVLPNVVHDGDFTLQEGKLRAFYAGPAHTPDGIFVYFPDEQVLYGNCILKEKLGNLSFADVKAYPQTLERLKAMKLPIKTVVGGHDSPLHGPELIDHYEALIKAAPQS	1	254	99.6063	0	0	0	253	Cluster_4	ChpA_family_subclass_B2_metallo-beta-lactamase_ImiS_NG_050415.1_cds_WP_063865298.1_1	Cluster_4	SP_Sec_SPI_	26-27	SP_Sec_SPI_	26-27	N_Y_H_T_D	C	H	.	.
B2_1218	GCF_001901965.1	29491	645	Aeromonas_salmonicida_subsp_salmonicida	Bacteria-Pseudomonadota-Gammaproteobacteria-Aeromonadales-Aeromonadaceae-Aeromonas-	4823596	NZ_MIIN01000032.1	class_B2	541.4	+	58048	58804	58049	58810	ATGAAAGGTTGGATAAAGTGCGGGCTGGCCGGAGCTGTGGTGCTGGTGGCGAGTTTCTGGGGCGGCAGCGTGCATGCGGCGGCGATCTCCCTCACTCAGGTAAGCGGCCCTGTCTATGTGGTGGAGGATAACTACTACGTCAAAGAGAACTCCATGGTTTATTTCGGAGCCAAGGGAGTGACGATAGTGGGGGCGACCTGGACGCCGGATACCGCCCGCGAGCTGCACAAGCTGATCAAACGGGTCAGCAACAAGCCTGTGCTGGAGGTGATCAACACCAACTACCACACGGACAGGGCAGGGGGTAACGCCTACTGGAAGTCCATCGGTGCCAAGGTGGTCTCGACCCGCCAGACCCGGGATCTGATGAAGAGCGACTGGGCCGAGATCGTCGCCTTT…	WP_005320513.1	CphA_family_subclass_B2_metallo-beta-lactamase	MKGWIKCGLAGAVVLVASFWGGSVHAAAISLTQVSGPVYVVEDNYYVKENSMVYFGAKGVTIVGATWTPDTARELHKLIKRVSNKPVLEVINTNYHTDRAGGNAYWKSIGAKVVSTRQTRDLMKSDWAEIVAFTRKGLPEYPDLPLVLPNVVHDGDFNLQEGKVRAFYAGPAHTPDGIFVYFPDQQVLYGNCILKEKLGNLSFADVKAYPQTLERLKAMKLPIKIVVGGHDSPLHGPELIDHYQALIKAAPQA	ORF_OK	TRUE_HIT	mmkgwikcglagavvllasfwggsvraagislkqvsgpvyvvednyyvkensmvyfgakgvtvvgatwtpdtarelhklikrvsskpvlevintnyhtdraggnaywksigakvvatrqtrdlmksdwaeivaftrkglpeypdlplvlpnvvhdgdftlqegkvralyagpahtpdgifvyfpdeqvlygncilkeklgnlsfadvkaypktlerlkalklpiktvigghdsplhgpelidhyealikaaak	MMKGWIKCGLAGAVVLVASFWGGSVHAAAISLTQVSGPVYVVEDNYYVKENSMVYFGAKGVTIVGATWTPDTARELHKLIKRVSNKPVLEVINTNYHTDRAGGNAYWKSIGAKVVSTRQTRDLMKSDWAEIVAFTRKGLPEYPDLPLVLPNVVHDGDFNLQEGKVRAFYAGPAHTPDGIFVYFPDQQVLYGNCILKEKLGNLSFADVKAYPQTLERLKAMKLPIKIVVGGHDSPLHGPELIDHYQALIKAAPQ	1	253	99.2126	0	0	0	253	Cluster_4	ChpA_family_subclass_B2_metallo-beta-lactamase_ImiS_NG_050415.1_cds_WP_063865298.1_1	Cluster_4	SP_Sec_SPI_	26-27	SP_Sec_SPI_	26-27	N_Y_H_T_D	C	H	.	.
B2_1219	GCF_001901975.1	29491	645	Aeromonas_salmonicida_subsp_salmonicida	Bacteria-Pseudomonadota-Gammaproteobacteria-Aeromonadales-Aeromonadaceae-Aeromonas-	5167036	NZ_MIIM01000149.1	class_B2	541.6	+	58463	59219	58464	59225	ATGAAAGGTTGGATAAAGTGCGGGCTGGCCGGAGCTGTGGTGCTGGTGGCGAGTTTCTGGGGCGGCAGCGTGCATGCGGCGGCGATCTCCCTCACTCAGGTAAGCGGCCCTGTCTATGTGGTGGAGGATAACTACTACGTCAAAGAGAACTCCATGGTTTATTTCGGAGCCAAGGGAGTGACGATAGTGGGGGCGACCTGGACGCCGGATACCGCCCGCGAGCTGCACAAGCTGATCAAACGGGTCAGCAACAAGCCTGTGCTGGAGGTGATCAACACCAACTACCACACGGACAGGGCAGGGGGTAACGCCTACTGGAAGTCCATCGGTGCCAAGGTGGTCTCGACCCGCCAGACCCGGGATCTGATGAAGAGCGACTGGGCCGAGATCGTCGCCTTT…	WP_005320513.1	CphA_family_subclass_B2_metallo-beta-lactamase	MKGWIKCGLAGAVVLVASFWGGSVHAAAISLTQVSGPVYVVEDNYYVKENSMVYFGAKGVTIVGATWTPDTARELHKLIKRVSNKPVLEVINTNYHTDRAGGNAYWKSIGAKVVSTRQTRDLMKSDWAEIVAFTRKGLPEYPDLPLVLPNVVHDGDFNLQEGKVRAFYAGPAHTPDGIFVYFPDQQVLYGNCILKEKLGNLSFADVKAYPQTLERLKAMKLPIKIVVGGHDSPLHGPELIDHYQALIKAAPQA	ORF_OK	TRUE_HIT	mmkgwikcglagavvllasfwggsvraagislkqvsgpvyvvednyyvkensmvyfgakgvtvvgatwtpdtarelhklikrvsskpvlevintnyhtdraggnaywksigakvvatrqtrdlmksdwaeivaftrkglpeypdlplvlpnvvhdgdftlqegkvralyagpahtpdgifvyfpdeqvlygncilkeklgnlsfadvkaypktlerlkalklpiktvigghdsplhgpelidhyealikaaak	MMKGWIKCGLAGAVVLVASFWGGSVHAAAISLTQVSGPVYVVEDNYYVKENSMVYFGAKGVTIVGATWTPDTARELHKLIKRVSNKPVLEVINTNYHTDRAGGNAYWKSIGAKVVSTRQTRDLMKSDWAEIVAFTRKGLPEYPDLPLVLPNVVHDGDFNLQEGKVRAFYAGPAHTPDGIFVYFPDQQVLYGNCILKEKLGNLSFADVKAYPQTLERLKAMKLPIKIVVGGHDSPLHGPELIDHYQALIKAAPQ	1	253	99.2126	0	0	0	253	Cluster_4	ChpA_family_subclass_B2_metallo-beta-lactamase_ImiS_NG_050415.1_cds_WP_063865298.1_1	Cluster_4	SP_Sec_SPI_	26-27	SP_Sec_SPI_	26-27	N_Y_H_T_D	C	H	.	.
B2_122	GCF_009498775.1	1615674	1615674	Pseudomonas_lactis	Bacteria-Pseudomonadota-Gammaproteobacteria-Pseudomonadales-Pseudomonadaceae-Pseudomonas-	6209511	NZ_QTSW01000006.1	class_B2	369.2	-	142941	143625	142930	143721	GTGTTGTATAACTCTTTCTCTGAGAAACTTATGAAGCTTATTAATATCCTGTCAGCCATCAGCCTGGCCTGCATCACCTCCCAGGTCTTCGCTAACCAGAGTGACTTGACCCTTACCCACTTCAAAGGCCCGCTCTACATCGTTGAAGACAAGGAGTATGTGCAGGAGAACTCAATGGTCTACATTGGCGCGCAACACATTACGGTTATCGGCGCAACCTGGACTCCCGCCACCGCTGAAAAGCTGGAGCAGGAAATCAGAAAAATCAGCCCCCTGCCCATCAAGGAGGTAATCAACACCAACTACCACACCGACCGGGCGGGAGGTAACGCCTACTGGAAGGAGCTCGGCGCCAGTATTGTCTCCACACAGATGACCTATGACCTGGAAAAAAGCCAG…	WP_323372788.1	PFM_family_subclass_B2_metallo-beta-lactamase	MLYNSFSEKLMKLINILSAISLACITSQVFANQSDLTLTHFKGPLYIVEDKEYVQENSMVYIGAQHITVIGATWTPATAEKLEQEIRKISPLPIKEVINTNYHTDRAGGNAYWKELGASIVSTQMTYDLEKSQWRSIVDFTRQGMEHYPVLEQSLPDQVYPGDFALQSGHVRALYLGASHTEDGIFVYFPEERVLYGNCILKEKLGNMTFANRSEYPKTLKKLQVLISSGELPVETIIAGHNSPIQSVELIDHYLNLLEHGEQ	ORF_OK	TRUE_HIT	raagislkqvsgpvyvvednyyvkensmvyfgakgvtvvgatwtpdtarelhklikrvsskpvlevintnyhtdraggnaywksigakvvatrqtrdlmksdwaeivaftrkglpeypdlplvlpnvvhdgdftlqegkvralyagpahtpdgifvyfpdeqvlygncilkeklgnlsfadvkaypktlerlkal....klpiktvigghdsplhgpelidhyealika	NQSDLTLTHFKGPLYIVEDKEYVQENSMVYIGAQHITVIGATWTPATAEKLEQEIRKISPLPIKEVINTNYHTDRAGGNAYWKELGASIVSTQMTYDLEKSQWRSIVDFTRQGMEHYPVLEQSLPDQVYPGDFALQSGHVRALYLGASHTEDGIFVYFPEERVLYGNCILKEKLGNMTFANRSEYPKTLKKLQVLissgELPVETIIAGHNSPIQSVELIDHYLNLLEH	26	250	88.189	4	0	0	263	Cluster_1	CLUSTER_NOT_IN_NCBI_AMR_REF_DB	Cluster_1	SP_Sec_SPI_	31-32	SP_Sec_SPI_	31-32	N_Y_H_T_D	C	H	.	.
B2_1220	GCF_001902045.1	29491	645	Aeromonas_salmonicida_subsp_salmonicida	Bacteria-Pseudomonadota-Gammaproteobacteria-Aeromonadales-Aeromonadaceae-Aeromonas-	4867561	NZ_MIIQ01000029.1	class_B2	541.4	+	58048	58804	58049	58810	ATGAAAGGTTGGATAAAGTGCGGGCTGGCCGGAGCTGTGGTGCTGGTGGCGAGTTTCTGGGGCGGCAGCGTGCATGCGGCGGCGATCTCCCTCACTCAGGTAAGCGGCCCTGTCTATGTGGTGGAGGATAACTACTACGTCAAAGAGAACTCCATGGTTTATTTCGGAGCCAAGGGAGTGACGATAGTGGGGGCGACCTGGACGCCGGATACCGCCCGCGAGCTGCACAAGCTGATCAAACGGGTCAGCAACAAGCCTGTGCTGGAGGTGATCAACACCAACTACCACACGGACAGGGCAGGGGGTAACGCCTACTGGAAGTCCATCGGTGCCAAGGTGGTCTCGACCCGCCAGACCCGGGATCTGATGAAGAGCGACTGGGCCGAGATCGTCGCCTTT…	WP_005320513.1	CphA_family_subclass_B2_metallo-beta-lactamase	MKGWIKCGLAGAVVLVASFWGGSVHAAAISLTQVSGPVYVVEDNYYVKENSMVYFGAKGVTIVGATWTPDTARELHKLIKRVSNKPVLEVINTNYHTDRAGGNAYWKSIGAKVVSTRQTRDLMKSDWAEIVAFTRKGLPEYPDLPLVLPNVVHDGDFNLQEGKVRAFYAGPAHTPDGIFVYFPDQQVLYGNCILKEKLGNLSFADVKAYPQTLERLKAMKLPIKIVVGGHDSPLHGPELIDHYQALIKAAPQA	ORF_OK	TRUE_HIT	mmkgwikcglagavvllasfwggsvraagislkqvsgpvyvvednyyvkensmvyfgakgvtvvgatwtpdtarelhklikrvsskpvlevintnyhtdraggnaywksigakvvatrqtrdlmksdwaeivaftrkglpeypdlplvlpnvvhdgdftlqegkvralyagpahtpdgifvyfpdeqvlygncilkeklgnlsfadvkaypktlerlkalklpiktvigghdsplhgpelidhyealikaaak	MMKGWIKCGLAGAVVLVASFWGGSVHAAAISLTQVSGPVYVVEDNYYVKENSMVYFGAKGVTIVGATWTPDTARELHKLIKRVSNKPVLEVINTNYHTDRAGGNAYWKSIGAKVVSTRQTRDLMKSDWAEIVAFTRKGLPEYPDLPLVLPNVVHDGDFNLQEGKVRAFYAGPAHTPDGIFVYFPDQQVLYGNCILKEKLGNLSFADVKAYPQTLERLKAMKLPIKIVVGGHDSPLHGPELIDHYQALIKAAPQ	1	253	99.2126	0	0	0	253	Cluster_4	ChpA_family_subclass_B2_metallo-beta-lactamase_ImiS_NG_050415.1_cds_WP_063865298.1_1	Cluster_4	SP_Sec_SPI_	26-27	SP_Sec_SPI_	26-27	N_Y_H_T_D	C	H	.	.
B2_1221	GCF_001902055.1	29491	645	Aeromonas_salmonicida_subsp_salmonicida	Bacteria-Pseudomonadota-Gammaproteobacteria-Aeromonadales-Aeromonadaceae-Aeromonas-	4895630	NZ_MIIR01000033.1	class_B2	541.4	+	58048	58804	58049	58810	ATGAAAGGTTGGATAAAGTGCGGGCTGGCCGGAGCTGTGGTGCTGGTGGCGAGTTTCTGGGGCGGCAGCGTGCATGCGGCGGCGATCTCCCTCACTCAGGTAAGCGGCCCTGTCTATGTGGTGGAGGATAACTACTACGTCAAAGAGAACTCCATGGTTTATTTCGGAGCCAAGGGAGTGACGATAGTGGGGGCGACCTGGACGCCGGATACCGCCCGCGAGCTGCACAAGCTGATCAAACGGGTCAGCAACAAGCCTGTGCTGGAGGTGATCAACACCAACTACCACACGGACAGGGCAGGGGGTAACGCCTACTGGAAGTCCATCGGTGCCAAGGTGGTCTCGACCCGCCAGACCCGGGATCTGATGAAGAGCGACTGGGCCGAGATCGTCGCCTTT…	WP_005320513.1	CphA_family_subclass_B2_metallo-beta-lactamase	MKGWIKCGLAGAVVLVASFWGGSVHAAAISLTQVSGPVYVVEDNYYVKENSMVYFGAKGVTIVGATWTPDTARELHKLIKRVSNKPVLEVINTNYHTDRAGGNAYWKSIGAKVVSTRQTRDLMKSDWAEIVAFTRKGLPEYPDLPLVLPNVVHDGDFNLQEGKVRAFYAGPAHTPDGIFVYFPDQQVLYGNCILKEKLGNLSFADVKAYPQTLERLKAMKLPIKIVVGGHDSPLHGPELIDHYQALIKAAPQA	ORF_OK	TRUE_HIT	mmkgwikcglagavvllasfwggsvraagislkqvsgpvyvvednyyvkensmvyfgakgvtvvgatwtpdtarelhklikrvsskpvlevintnyhtdraggnaywksigakvvatrqtrdlmksdwaeivaftrkglpeypdlplvlpnvvhdgdftlqegkvralyagpahtpdgifvyfpdeqvlygncilkeklgnlsfadvkaypktlerlkalklpiktvigghdsplhgpelidhyealikaaak	MMKGWIKCGLAGAVVLVASFWGGSVHAAAISLTQVSGPVYVVEDNYYVKENSMVYFGAKGVTIVGATWTPDTARELHKLIKRVSNKPVLEVINTNYHTDRAGGNAYWKSIGAKVVSTRQTRDLMKSDWAEIVAFTRKGLPEYPDLPLVLPNVVHDGDFNLQEGKVRAFYAGPAHTPDGIFVYFPDQQVLYGNCILKEKLGNLSFADVKAYPQTLERLKAMKLPIKIVVGGHDSPLHGPELIDHYQALIKAAPQ	1	253	99.2126	0	0	0	253	Cluster_4	ChpA_family_subclass_B2_metallo-beta-lactamase_ImiS_NG_050415.1_cds_WP_063865298.1_1	Cluster_4	SP_Sec_SPI_	26-27	SP_Sec_SPI_	26-27	N_Y_H_T_D	C	H	.	.
[truncated: 1,009 more rows]
