# Supplementary material for: Predatory myxobacteria lay at the cross-roads of metallo-β-lactamase evolution
Source: Research Square preprint supplement (doi:10.21203/rs.3.rs-7386923/v1), 2025-09-15
Supplement: Supplementary file 4 [file e832bfc4722445853f4637d0.xlsx]

## Sheet: class_B1_metrics
taxonomic_level	OTU	total_genomes	species	class_totals_hits	class_totals_genomes	class_totals_genomes_perc	class_totals_species	class_totals_species_perc	class_whole_hits	class_whole_genomes	class_whole_genomes_perc	class_whole_species	class_whole_species_perc	dif_clusters_cds	rel_richness_cds	dif_clusters_proteins	rel_richness_proteins	true_hits	true_hits_genomes	true_hits_genomes_perc	true_hits_species	true_hits_species_perc	true_hits_cds_clu	true_hits_prot_clu	true_hits_secreted	true_hits_secreted_genomes	true_hits_secreted_genomes_perc	true_hits_secreted_species	true_hits_secreted_species_perc	true_hits_secreted_cds_clu	true_hits_secreted_prot_clu
FIRST	Archaea	2312	1192	0	0	0	0	0	0	0	0	0	0	0	NA	0	NA	0	0	0	0	0	0	0	0	0	0	0	0	0	0
SECOND	Candidatus_Bathyarchaeota	5	2	0	0	0	0	0	0	0	0	0	0	0	NA	0	NA	0	0	0	0	0	0	0	0	0	0	0	0	0	0
THIRD	Candidatus_Bathyarchaeia	5	2	0	0	0	0	0	0	0	0	0	0	0	NA	0	NA	0	0	0	0	0	0	0	0	0	0	0	0	0	0
FORTH	Candidatus_Bathyarchaeales	4	1	0	0	0	0	0	0	0	0	0	0	0	NA	0	NA	0	0	0	0	0	0	0	0	0	0	0	0	0	0
FIFTH	Candidatus_Bathycorpusculaceae	4	1	0	0	0	0	0	0	0	0	0	0	0	NA	0	NA	0	0	0	0	0	0	0	0	0	0	0	0	0	0
SIXTH	Candidatus_Bathycorpusculum	4	1	0	0	0	0	0	0	0	0	0	0	0	NA	0	NA	0	0	0	0	0	0	0	0	0	0	0	0	0	0
SEVENTH	unclassified_Candidatus_Bathycorpusculum	4	1	0	0	0	0	0	0	0	0	0	0	0	NA	0	NA	0	0	0	0	0	0	0	0	0	0	0	0	0	0
FORTH	Candidatus_Hecatellales	1	1	0	0	0	0	0	0	0	0	0	0	0	NA	0	NA	0	0	0	0	0	0	0	0	0	0	0	0	0	0
FIFTH	Candidatus_Hecatellaceae	1	1	0	0	0	0	0	0	0	0	0	0	0	NA	0	NA	0	0	0	0	0	0	0	0	0	0	0	0	0	0
SIXTH	Candidatus_Hecatella	1	1	0	0	0	0	0	0	0	0	0	0	0	NA	0	NA	0	0	0	0	0	0	0	0	0	0	0	0	0	0
SECOND	Candidatus_Borrarchaeota	1	1	0	0	0	0	0	0	0	0	0	0	0	NA	0	NA	0	0	0	0	0	0	0	0	0	0	0	0	0	0
THIRD	Candidatus_Borrarchaeia	1	1	0	0	0	0	0	0	0	0	0	0	0	NA	0	NA	0	0	0	0	0	0	0	0	0	0	0	0	0	0
FORTH	Candidatus_Borrarchaeales	1	1	0	0	0	0	0	0	0	0	0	0	0	NA	0	NA	0	0	0	0	0	0	0	0	0	0	0	0	0	0
FIFTH	Candidatus_Borrarchaeaceae	1	1	0	0	0	0	0	0	0	0	0	0	0	NA	0	NA	0	0	0	0	0	0	0	0	0	0	0	0	0	0
SIXTH	Candidatus_Borrarchaeum	1	1	0	0	0	0	0	0	0	0	0	0	0	NA	0	NA	0	0	0	0	0	0	0	0	0	0	0	0	0	0
SEVENTH	unclassified_Candidatus_Borrarchaeum	1	1	0	0	0	0	0	0	0	0	0	0	0	NA	0	NA	0	0	0	0	0	0	0	0	0	0	0	0	0	0
SECOND	Candidatus_Culexarchaeota	1	1	0	0	0	0	0	0	0	0	0	0	0	NA	0	NA	0	0	0	0	0	0	0	0	0	0	0	0	0	0
THIRD	Candidatus_Culexarchaeia	1	1	0	0	0	0	0	0	0	0	0	0	0	NA	0	NA	0	0	0	0	0	0	0	0	0	0	0	0	0	0
FORTH	Candidatus_Culexarchaeles	1	1	0	0	0	0	0	0	0	0	0	0	0	NA	0	NA	0	0	0	0	0	0	0	0	0	0	0	0	0	0
FIFTH	Candidatus_Culexarchaeaceae	1	1	0	0	0	0	0	0	0	0	0	0	0	NA	0	NA	0	0	0	0	0	0	0	0	0	0	0	0	0	0
SIXTH	Candidatus_Culexarchaeum	1	1	0	0	0	0	0	0	0	0	0	0	0	NA	0	NA	0	0	0	0	0	0	0	0	0	0	0	0	0	0
SECOND	Candidatus_Hadarchaeota	3	1	0	0	0	0	0	0	0	0	0	0	0	NA	0	NA	0	0	0	0	0	0	0	0	0	0	0	0	0	0
THIRD	Candidatus_Hadarchaeia	3	1	0	0	0	0	0	0	0	0	0	0	0	NA	0	NA	0	0	0	0	0	0	0	0	0	0	0	0	0	0
FORTH	Candidatus_Hadarchaeales	3	1	0	0	0	0	0	0	0	0	0	0	0	NA	0	NA	0	0	0	0	0	0	0	0	0	0	0	0	0	0
FIFTH	Candidatus_Hadarchaeaceae	3	1	0	0	0	0	0	0	0	0	0	0	0	NA	0	NA	0	0	0	0	0	0	0	0	0	0	0	0	0	0
SIXTH	Candidatus_Hadarchaeum	3	1	0	0	0	0	0	0	0	0	0	0	0	NA	0	NA	0	0	0	0	0	0	0	0	0	0	0	0	0	0
SEVENTH	unclassified_Candidatus_Hadarchaeum	3	1	0	0	0	0	0	0	0	0	0	0	0	NA	0	NA	0	0	0	0	0	0	0	0	0	0	0	0	0	0
SECOND	Candidatus_Lokiarchaeota	1	1	0	0	0	0	0	0	0	0	0	0	0	NA	0	NA	0	0	0	0	0	0	0	0	0	0	0	0	0	0
THIRD	Candidatus_Lokiarchaeia	1	1	0	0	0	0	0	0	0	0	0	0	0	NA	0	NA	0	0	0	0	0	0	0	0	0	0	0	0	0	0
FORTH	Candidatus_Prometheoarchaeales	1	1	0	0	0	0	0	0	0	0	0	0	0	NA	0	NA	0	0	0	0	0	0	0	0	0	0	0	0	0	0
FIFTH	Candidatus_Prometheoarchaeaceae	1	1	0	0	0	0	0	0	0	0	0	0	0	NA	0	NA	0	0	0	0	0	0	0	0	0	0	0	0	0	0
SIXTH	Candidatus_Prometheoarchaeum	1	1	0	0	0	0	0	0	0	0	0	0	0	NA	0	NA	0	0	0	0	0	0	0	0	0	0	0	0	0	0
SECOND	Candidatus_Micrarchaeota	2	2	0	0	0	0	0	0	0	0	0	0	0	NA	0	NA	0	0	0	0	0	0	0	0	0	0	0	0	0	0
THIRD	Candidatus_Mancarchaeum	1	1	0	0	0	0	0	0	0	0	0	0	0	NA	0	NA	0	0	0	0	0	0	0	0	0	0	0	0	0	0
THIRD	Candidatus_Micrarchaeia	1	1	0	0	0	0	0	0	0	0	0	0	0	NA	0	NA	0	0	0	0	0	0	0	0	0	0	0	0	0	0
FORTH	Candidatus_Micrarchaeales	1	1	0	0	0	0	0	0	0	0	0	0	0	NA	0	NA	0	0	0	0	0	0	0	0	0	0	0	0	0	0
FIFTH	Candidatus_Micrarchaeaceae	1	1	0	0	0	0	0	0	0	0	0	0	0	NA	0	NA	0	0	0	0	0	0	0	0	0	0	0	0	0	0
SIXTH	Candidatus_Micrarchaeum	1	1	0	0	0	0	0	0	0	0	0	0	0	NA	0	NA	0	0	0	0	0	0	0	0	0	0	0	0	0	0
SEVENTH	unclassified_Candidatus_Micrarchaeum	1	1	0	0	0	0	0	0	0	0	0	0	0	NA	0	NA	0	0	0	0	0	0	0	0	0	0	0	0	0	0
SECOND	Candidatus_Nanohalarchaeota	3	3	0	0	0	0	0	0	0	0	0	0	0	NA	0	NA	0	0	0	0	0	0	0	0	0	0	0	0	0	0
THIRD	Candidatus_Nanohalarchaeota_incertae_sedis	2	2	0	0	0	0	0	0	0	0	0	0	0	NA	0	NA	0	0	0	0	0	0	0	0	0	0	0	0	0	0
FORTH	Candidatus_Nanohalococcus	1	1	0	0	0	0	0	0	0	0	0	0	0	NA	0	NA	0	0	0	0	0	0	0	0	0	0	0	0	0	0
FORTH	Candidatus_Nanohalovita	1	1	0	0	0	0	0	0	0	0	0	0	0	NA	0	NA	0	0	0	0	0	0	0	0	0	0	0	0	0	0
THIRD	Candidatus_Nanohalobia	1	1	0	0	0	0	0	0	0	0	0	0	0	NA	0	NA	0	0	0	0	0	0	0	0	0	0	0	0	0	0
FORTH	Candidatus_Nanohalobiales	1	1	0	0	0	0	0	0	0	0	0	0	0	NA	0	NA	0	0	0	0	0	0	0	0	0	0	0	0	0	0
FIFTH	Candidatus_Nanohalobiaceae	1	1	0	0	0	0	0	0	0	0	0	0	0	NA	0	NA	0	0	0	0	0	0	0	0	0	0	0	0	0	0
SIXTH	Candidatus_Nanohalobium	1	1	0	0	0	0	0	0	0	0	0	0	0	NA	0	NA	0	0	0	0	0	0	0	0	0	0	0	0	0	0
SECOND	Candidatus_Thermoplasmatota	49	25	0	0	0	0	0	0	0	0	0	0	0	NA	0	NA	0	0	0	0	0	0	0	0	0	0	0	0	0	0
THIRD	Candidatus_Aciduliprofundum	2	2	0	0	0	0	0	0	0	0	0	0	0	NA	0	NA	0	0	0	0	0	0	0	0	0	0	0	0	0	0
FORTH	unclassified_Aciduliprofundum	1	1	0	0	0	0	0	0	0	0	0	0	0	NA	0	NA	0	0	0	0	0	0	0	0	0	0	0	0	0	0
THIRD	Candidatus_Poseidoniia	4	3	0	0	0	0	0	0	0	0	0	0	0	NA	0	NA	0	0	0	0	0	0	0	0	0	0	0	0	0	0
FORTH	Candidatus_Poseidoniales	4	3	0	0	0	0	0	0	0	0	0	0	0	NA	0	NA	0	0	0	0	0	0	0	0	0	0	0	0	0	0
FIFTH	Candidatus_Poseidoniaceae	2	2	0	0	0	0	0	0	0	0	0	0	0	NA	0	NA	0	0	0	0	0	0	0	0	0	0	0	0	0	0
SIXTH	Candidatus_Poseidonia	2	2	0	0	0	0	0	0	0	0	0	0	0	NA	0	NA	0	0	0	0	0	0	0	0	0	0	0	0	0	0
SEVENTH	unclassified_Candidatus_Poseidonia	1	1	0	0	0	0	0	0	0	0	0	0	0	NA	0	NA	0	0	0	0	0	0	0	0	0	0	0	0	0	0
FIFTH	Candidatus_Thalassarchaeaceae	2	1	0	0	0	0	0	0	0	0	0	0	0	NA	0	NA	0	0	0	0	0	0	0	0	0	0	0	0	0	0
SIXTH	Candidatus_Thalassarchaeum	2	1	0	0	0	0	0	0	0	0	0	0	0	NA	0	NA	0	0	0	0	0	0	0	0	0	0	0	0	0	0
THIRD	Thermoplasmata	43	20	0	0	0	0	0	0	0	0	0	0	0	NA	0	NA	0	0	0	0	0	0	0	0	0	0	0	0	0	0
FORTH	Methanomassiliicoccales	9	5	0	0	0	0	0	0	0	0	0	0	0	NA	0	NA	0	0	0	0	0	0	0	0	0	0	0	0	0	0
FIFTH	Methanomassiliicoccaceae	5	3	0	0	0	0	0	0	0	0	0	0	0	NA	0	NA	0	0	0	0	0	0	0	0	0	0	0	0	0	0
SIXTH	Candidatus_Methanoplasma	1	1	0	0	0	0	0	0	0	0	0	0	0	NA	0	NA	0	0	0	0	0	0	0	0	0	0	0	0	0	0
SIXTH	Methanomassiliicoccus	4	2	0	0	0	0	0	0	0	0	0	0	0	NA	0	NA	0	0	0	0	0	0	0	0	0	0	0	0	0	0
FIFTH	Methanomethylophilaceae	4	2	0	0	0	0	0	0	0	0	0	0	0	NA	0	NA	0	0	0	0	0	0	0	0	0	0	0	0	0	0
SIXTH	Methanomethylophilus	4	2	0	0	0	0	0	0	0	0	0	0	0	NA	0	NA	0	0	0	0	0	0	0	0	0	0	0	0	0	0
SEVENTH	unclassified_Methanomethylophilus	1	1	0	0	0	0	0	0	0	0	0	0	0	NA	0	NA	0	0	0	0	0	0	0	0	0	0	0	0	0	0
FORTH	Thermoplasmatales	34	15	0	0	0	0	0	0	0	0	0	0	0	NA	0	NA	0	0	0	0	0	0	0	0	0	0	0	0	0	0
FIFTH	Cuniculiplasmataceae	2	1	0	0	0	0	0	0	0	0	0	0	0	NA	0	NA	0	0	0	0	0	0	0	0	0	0	0	0	0	0
SIXTH	Cuniculiplasma	2	1	0	0	0	0	0	0	0	0	0	0	0	NA	0	NA	0	0	0	0	0	0	0	0	0	0	0	0	0	0
FIFTH	Ferroplasmaceae	23	8	0	0	0	0	0	0	0	0	0	0	0	NA	0	NA	0	0	0	0	0	0	0	0	0	0	0	0	0	0
SIXTH	Acidiplasma	11	4	0	0	0	0	0	0	0	0	0	0	0	NA	0	NA	0	0	0	0	0	0	0	0	0	0	0	0	0	0
SEVENTH	unclassified_Acidiplasma	7	2	0	0	0	0	0	0	0	0	0	0	0	NA	0	NA	0	0	0	0	0	0	0	0	0	0	0	0	0	0
SIXTH	Ferroplasma	12	4	0	0	0	0	0	0	0	0	0	0	0	NA	0	NA	0	0	0	0	0	0	0	0	0	0	0	0	0	0
SEVENTH	environmental_samples	1	1	0	0	0	0	0	0	0	0	0	0	0	NA	0	NA	0	0	0	0	0	0	0	0	0	0	0	0	0	0
SEVENTH	unclassified_Ferroplasma	4	1	0	0	0	0	0	0	0	0	0	0	0	NA	0	NA	0	0	0	0	0	0	0	0	0	0	0	0	0	0
FIFTH	Picrophilaceae	2	1	0	0	0	0	0	0	0	0	0	0	0	NA	0	NA	0	0	0	0	0	0	0	0	0	0	0	0	0	0
SIXTH	Picrophilus	2	1	0	0	0	0	0	0	0	0	0	0	0	NA	0	NA	0	0	0	0	0	0	0	0	0	0	0	0	0	0
FIFTH	Thermoplasmataceae	5	4	0	0	0	0	0	0	0	0	0	0	0	NA	0	NA	0	0	0	0	0	0	0	0	0	0	0	0	0	0
SIXTH	Thermoplasma	5	4	0	0	0	0	0	0	0	0	0	0	0	NA	0	NA	0	0	0	0	0	0	0	0	0	0	0	0	0	0
SEVENTH	unclassified_Thermoplasma	3	2	0	0	0	0	0	0	0	0	0	0	0	NA	0	NA	0	0	0	0	0	0	0	0	0	0	0	0	0	0
FIFTH	Thermoplasmatales_incertae_sedis	2	1	0	0	0	0	0	0	0	0	0	0	0	NA	0	NA	0	0	0	0	0	0	0	0	0	0	0	0	0	0
SIXTH	Thermogymnomonas	2	1	0	0	0	0	0	0	0	0	0	0	0	NA	0	NA	0	0	0	0	0	0	0	0	0	0	0	0	0	0
SECOND	Euryarchaeota	1845	1009	0	0	0	0	0	0	0	0	0	0	0	NA	0	NA	0	0	0	0	0	0	0	0	0	0	0	0	0	0
THIRD	Archaeoglobi	18	13	0	0	0	0	0	0	0	0	0	0	0	NA	0	NA	0	0	0	0	0	0	0	0	0	0	0	0	0	0
FORTH	Archaeoglobales	18	13	0	0	0	0	0	0	0	0	0	0	0	NA	0	NA	0	0	0	0	0	0	0	0	0	0	0	0	0	0
FIFTH	Archaeoglobaceae	18	13	0	0	0	0	0	0	0	0	0	0	0	NA	0	NA	0	0	0	0	0	0	0	0	0	0	0	0	0	0
SIXTH	Archaeoglobus	13	9	0	0	0	0	0	0	0	0	0	0	0	NA	0	NA	0	0	0	0	0	0	0	0	0	0	0	0	0	0
SEVENTH	unclassified_Archaeoglobus	5	4	0	0	0	0	0	0	0	0	0	0	0	NA	0	NA	0	0	0	0	0	0	0	0	0	0	0	0	0	0
SIXTH	Ferroglobus	2	2	0	0	0	0	0	0	0	0	0	0	0	NA	0	NA	0	0	0	0	0	0	0	0	0	0	0	0	0	0
SEVENTH	unclassified_Ferroglobus	1	1	0	0	0	0	0	0	0	0	0	0	0	NA	0	NA	0	0	0	0	0	0	0	0	0	0	0	0	0	0
SIXTH	Geoglobus	3	2	0	0	0	0	0	0	0	0	0	0	0	NA	0	NA	0	0	0	0	0	0	0	0	0	0	0	0	0	0
THIRD	Candidatus_Methanoliparia	1	1	0	0	0	0	0	0	0	0	0	0	0	NA	0	NA	0	0	0	0	0	0	0	0	0	0	0	0	0	0
FORTH	Candidatus_Methanoliparales	1	1	0	0	0	0	0	0	0	0	0	0	0	NA	0	NA	0	0	0	0	0	0	0	0	0	0	0	0	0	0
FIFTH	Candidatus_Methanoliparaceae	1	1	0	0	0	0	0	0	0	0	0	0	0	NA	0	NA	0	0	0	0	0	0	0	0	0	0	0	0	0	0
SIXTH	Candidatus_Methanoliparum	1	1	0	0	0	0	0	0	0	0	0	0	0	NA	0	NA	0	0	0	0	0	0	0	0	0	0	0	0	0	0
SEVENTH	unclassified_Candidatus_Methanoliparum	1	1	0	0	0	0	0	0	0	0	0	0	0	NA	0	NA	0	0	0	0	0	0	0	0	0	0	0	0	0	0
THIRD	Halobacteria	914	629	0	0	0	0	0	0	0	0	0	0	0	NA	0	NA	0	0	0	0	0	0	0	0	0	0	0	0	0	0
FORTH	Halobacteriales	913	628	0	0	0	0	0	0	0	0	0	0	0	NA	0	NA	0	0	0	0	0	0	0	0	0	0	0	0	0	0
FIFTH	Haladaptataceae	51	43	0	0	0	0	0	0	0	0	0	0	0	NA	0	NA	0	0	0	0	0	0	0	0	0	0	0	0	0	0
SIXTH	Haladaptatus	26	22	0	0	0	0	0	0	0	0	0	0	0	NA	0	NA	0	0	0	0	0	0	0	0	0	0	0	0	0	0
SEVENTH	unclassified_Haladaptatus	15	15	0	0	0	0	0	0	0	0	0	0	0	NA	0	NA	0	0	0	0	0	0	0	0	0	0	0	0	0	0
SIXTH	Halomicrococcus	1	1	0	0	0	0	0	0	0	0	0	0	0	NA	0	NA	0	0	0	0	0	0	0	0	0	0	0	0	0	0
SIXTH	Halorussus	24	20	0	0	0	0	0	0	0	0	0	0	0	NA	0	NA	0	0	0	0	0	0	0	0	0	0	0	0	0	0
SEVENTH	unclassified_Halorussus	3	3	0	0	0	0	0	0	0	0	0	0	0	NA	0	NA	0	0	0	0	0	0	0	0	0	0	0	0	0	0
FIFTH	Haloarculaceae	209	146	0	0	0	0	0	0	0	0	0	0	0	NA	0	NA	0	0	0	0	0	0	0	0	0	0	0	0	0	0
SIXTH	Halapricum	8	4	0	0	0	0	0	0	0	0	0	0	0	NA	0	NA	0	0	0	0	0	0	0	0	0	0	0	0	0	0
SEVENTH	unclassified_Halapricum	1	1	0	0	0	0	0	0	0	0	0	0	0	NA	0	NA	0	0	0	0	0	0	0	0	0	0	0	0	0	0
SIXTH	Haloarcula	85	60	0	0	0	0	0	0	0	0	0	0	0	NA	0	NA	0	0	0	0	0	0	0	0	0	0	0	0	0	0
SEVENTH	unclassified_Haloarcula	29	29	0	0	0	0	0	0	0	0	0	0	0	NA	0	NA	0	0	0	0	0	0	0	0	0	0	0	0	0	0
SIXTH	Halocatena	7	3	0	0	0	0	0	0	0	0	0	0	0	NA	0	NA	0	0	0	0	0	0	0	0	0	0	0	0	0	0
SIXTH	Halococcoides	1	1	0	0	0	0	0	0	0	0	0	0	0	NA	0	NA	0	0	0	0	0	0	0	0	0	0	0	0	0	0
SIXTH	Haloglomus	4	4	0	0	0	0	0	0	0	0	0	0	0	NA	0	NA	0	0	0	0	0	0	0	0	0	0	0	0	0	0
SIXTH	Halomarina	12	7	0	0	0	0	0	0	0	0	0	0	0	NA	0	NA	0	0	0	0	0	0	0	0	0	0	0	0	0	0
SIXTH	Halomicrobium	13	9	0	0	0	0	0	0	0	0	0	0	0	NA	0	NA	0	0	0	0	0	0	0	0	0	0	0	0	0	0
SEVENTH	unclassified_Halomicrobium	4	4	0	0	0	0	0	0	0	0	0	0	0	NA	0	NA	0	0	0	0	0	0	0	0	0	0	0	0	0	0
SIXTH	Halorarius	2	2	0	0	0	0	0	0	0	0	0	0	0	NA	0	NA	0	0	0	0	0	0	0	0	0	0	0	0	0	0
SIXTH	Halorhabdus	10	9	0	0	0	0	0	0	0	0	0	0	0	NA	0	NA	0	0	0	0	0	0	0	0	0	0	0	0	0	0
SEVENTH	unclassified_Halorhabdus	4	4	0	0	0	0	0	0	0	0	0	0	0	NA	0	NA	0	0	0	0	0	0	0	0	0	0	0	0	0	0
SIXTH	Halorientalis	13	10	0	0	0	0	0	0	0	0	0	0	0	NA	0	NA	0	0	0	0	0	0	0	0	0	0	0	0	0	0
SEVENTH	unclassified_Halorientalis	3	3	0	0	0	0	0	0	0	0	0	0	0	NA	0	NA	0	0	0	0	0	0	0	0	0	0	0	0	0	0
SIXTH	Halosegnis	10	4	0	0	0	0	0	0	0	0	0	0	0	NA	0	NA	0	0	0	0	0	0	0	0	0	0	0	0	0	0
SEVENTH	unclassified_Halosegnis	1	1	0	0	0	0	0	0	0	0	0	0	0	NA	0	NA	0	0	0	0	0	0	0	0	0	0	0	0	0	0
SIXTH	Halosimplex	8	7	0	0	0	0	0	0	0	0	0	0	0	NA	0	NA	0	0	0	0	0	0	0	0	0	0	0	0	0	0
SIXTH	Halovenus	8	5	0	0	0	0	0	0	0	0	0	0	0	NA	0	NA	0	0	0	0	0	0	0	0	0	0	0	0	0	0
SEVENTH	unclassified_Halovenus	1	1	0	0	0	0	0	0	0	0	0	0	0	NA	0	NA	0	0	0	0	0	0	0	0	0	0	0	0	0	0
SIXTH	Natronomonas	17	12	0	0	0	0	0	0	0	0	0	0	0	NA	0	NA	0	0	0	0	0	0	0	0	0	0	0	0	0	0
SEVENTH	unclassified_Natronomonas	7	4	0	0	0	0	0	0	0	0	0	0	0	NA	0	NA	0	0	0	0	0	0	0	0	0	0	0	0	0	0
SIXTH	Salinibaculum	4	4	0	0	0	0	0	0	0	0	0	0	0	NA	0	NA	0	0	0	0	0	0	0	0	0	0	0	0	0	0
SEVENTH	unclassified_Salinibaculum	4	4	0	0	0	0	0	0	0	0	0	0	0	NA	0	NA	0	0	0	0	0	0	0	0	0	0	0	0	0	0
SIXTH	Salinirubellus	6	4	0	0	0	0	0	0	0	0	0	0	0	NA	0	NA	0	0	0	0	0	0	0	0	0	0	0	0	0	0
SEVENTH	unclassified_Salinirubellus	3	3	0	0	0	0	0	0	0	0	0	0	0	NA	0	NA	0	0	0	0	0	0	0	0	0	0	0	0	0	0
SIXTH	Salinirussus	1	1	0	0	0	0	0	0	0	0	0	0	0	NA	0	NA	0	0	0	0	0	0	0	0	0	0	0	0	0	0
FIFTH	Halobacteriaceae	76	37	0	0	0	0	0	0	0	0	0	0	0	NA	0	NA	0	0	0	0	0	0	0	0	0	0	0	0	0	0
SIXTH	Actinarchaeum	1	1	0	0	0	0	0	0	0	0	0	0	0	NA	0	NA	0	0	0	0	0	0	0	0	0	0	0	0	0	0
SIXTH	Halanaeroarchaeum	3	2	0	0	0	0	0	0	0	0	0	0	0	NA	0	NA	0	0	0	0	0	0	0	0	0	0	0	0	0	0
SEVENTH	unclassified_Halanaeroarchaeum	1	1	0	0	0	0	0	0	0	0	0	0	0	NA	0	NA	0	0	0	0	0	0	0	0	0	0	0	0	0	0
SIXTH	Halarchaeum	9	7	0	0	0	0	0	0	0	0	0	0	0	NA	0	NA	0	0	0	0	0	0	0	0	0	0	0	0	0	0
SEVENTH	unclassified_Halarchaeum	1	1	0	0	0	0	0	0	0	0	0	0	0	NA	0	NA	0	0	0	0	0	0	0	0	0	0	0	0	0	0
SIXTH	Halobacterium	50	19	0	0	0	0	0	0	0	0	0	0	0	NA	0	NA	0	0	0	0	0	0	0	0	0	0	0	0	0	0
SEVENTH	unclassified_Halobacterium	10	10	0	0	0	0	0	0	0	0	0	0	0	NA	0	NA	0	0	0	0	0	0	0	0	0	0	0	0	0	0
SIXTH	Halocalculus	1	1	0	0	0	0	0	0	0	0	0	0	0	NA	0	NA	0	0	0	0	0	0	0	0	0	0	0	0	0	0
SIXTH	Halodesulfurarchaeum	5	3	0	0	0	0	0	0	0	0	0	0	0	NA	0	NA	0	0	0	0	0	0	0	0	0	0	0	0	0	0
SEVENTH	unclassified_Halodesulfurarchaeum	3	2	0	0	0	0	0	0	0	0	0	0	0	NA	0	NA	0	0	0	0	0	0	0	0	0	0	0	0	0	0
SIXTH	Halospeciosus	3	1	0	0	0	0	0	0	0	0	0	0	0	NA	0	NA	0	0	0	0	0	0	0	0	0	0	0	0	0	0
SIXTH	Salarchaeum	4	3	0	0	0	0	0	0	0	0	0	0	0	NA	0	NA	0	0	0	0	0	0	0	0	0	0	0	0	0	0
SEVENTH	unclassified_Salarchaeum	2	2	0	0	0	0	0	0	0	0	0	0	0	NA	0	NA	0	0	0	0	0	0	0	0	0	0	0	0	0	0
FIFTH	Halococcaceae	28	23	0	0	0	0	0	0	0	0	0	0	0	NA	0	NA	0	0	0	0	0	0	0	0	0	0	0	0	0	0
SIXTH	Halalkalicoccus	14	11	0	0	0	0	0	0	0	0	0	0	0	NA	0	NA	0	0	0	0	0	0	0	0	0	0	0	0	0	0
SEVENTH	unclassified_Halalkalicoccus	7	7	0	0	0	0	0	0	0	0	0	0	0	NA	0	NA	0	0	0	0	0	0	0	0	0	0	0	0	0	0
SIXTH	Halococcus	14	12	0	0	0	0	0	0	0	0	0	0	0	NA	0	NA	0	0	0	0	0	0	0	0	0	0	0	0	0	0
SEVENTH	unclassified_Halococcus	2	2	0	0	0	0	0	0	0	0	0	0	0	NA	0	NA	0	0	0	0	0	0	0	0	0	0	0	0	0	0
FIFTH	Haloferacaceae	367	234	0	0	0	0	0	0	0	0	0	0	0	NA	0	NA	0	0	0	0	0	0	0	0	0	0	0	0	0	0
SIXTH	Candidatus_Halobonum	1	1	0	0	0	0	0	0	0	0	0	0	0	NA	0	NA	0	0	0	0	0	0	0	0	0	0	0	0	0	0
SIXTH	Halalkaliarchaeum	3	3	0	0	0	0	0	0	0	0	0	0	0	NA	0	NA	0	0	0	0	0	0	0	0	0	0	0	0	0	0
SEVENTH	unclassified_Halalkaliarchaeum	2	2	0	0	0	0	0	0	0	0	0	0	0	NA	0	NA	0	0	0	0	0	0	0	0	0	0	0	0	0	0
SIXTH	Halalkalirubrum	1	1	0	0	0	0	0	0	0	0	0	0	0	NA	0	NA	0	0	0	0	0	0	0	0	0	0	0	0	0	0
SIXTH	Halegenticoccus	2	2	0	0	0	0	0	0	0	0	0	0	0	NA	0	NA	0	0	0	0	0	0	0	0	0	0	0	0	0	0
SIXTH	Halobaculum	20	15	0	0	0	0	0	0	0	0	0	0	0	NA	0	NA	0	0	0	0	0	0	0	0	0	0	0	0	0	0
SEVENTH	unclassified_Halobaculum	5	5	0	0	0	0	0	0	0	0	0	0	0	NA	0	NA	0	0	0	0	0	0	0	0	0	0	0	0	0	0
SIXTH	Halobellus	23	17	0	0	0	0	0	0	0	0	0	0	0	NA	0	NA	0	0	0	0	0	0	0	0	0	0	0	0	0	0
SEVENTH	unclassified_Halobellus	8	8	0	0	0	0	0	0	0	0	0	0	0	NA	0	NA	0	0	0	0	0	0	0	0	0	0	0	0	0	0
SIXTH	Halobium	3	1	0	0	0	0	0	0	0	0	0	0	0	NA	0	NA	0	0	0	0	0	0	0	0	0	0	0	0	0	0
SIXTH	Haloferax	66	41	0	0	0	0	0	0	0	0	0	0	0	NA	0	NA	0	0	0	0	0	0	0	0	0	0	0	0	0	0
SEVENTH	unclassified_Haloferax	24	24	0	0	0	0	0	0	0	0	0	0	0	NA	0	NA	0	0	0	0	0	0	0	0	0	0	0	0	0	0
SIXTH	Halogeometricum	11	7	0	0	0	0	0	0	0	0	0	0	0	NA	0	NA	0	0	0	0	0	0	0	0	0	0	0	0	0	0
SEVENTH	unclassified_Halogeometricum	3	3	0	0	0	0	0	0	0	0	0	0	0	NA	0	NA	0	0	0	0	0	0	0	0	0	0	0	0	0	0
SIXTH	Halogranum	4	3	0	0	0	0	0	0	0	0	0	0	0	NA	0	NA	0	0	0	0	0	0	0	0	0	0	0	0	0	0
SIXTH	Halohasta	5	3	0	0	0	0	0	0	0	0	0	0	0	NA	0	NA	0	0	0	0	0	0	0	0	0	0	0	0	0	0
SIXTH	Halolamina	14	9	0	0	0	0	0	0	0	0	0	0	0	NA	0	NA	0	0	0	0	0	0	0	0	0	0	0	0	0	0
SEVENTH	unclassified_Halolamina	4	3	0	0	0	0	0	0	0	0	0	0	0	NA	0	NA	0	0	0	0	0	0	0	0	0	0	0	0	0	0
SIXTH	Halonotius	5	5	0	0	0	0	0	0	0	0	0	0	0	NA	0	NA	0	0	0	0	0	0	0	0	0	0	0	0	0	0
SEVENTH	unclassified_Halonotius	1	1	0	0	0	0	0	0	0	0	0	0	0	NA	0	NA	0	0	0	0	0	0	0	0	0	0	0	0	0	0
SIXTH	Haloparvum	1	1	0	0	0	0	0	0	0	0	0	0	0	NA	0	NA	0	0	0	0	0	0	0	0	0	0	0	0	0	0
SIXTH	Halopelagius	4	3	0	0	0	0	0	0	0	0	0	0	0	NA	0	NA	0	0	0	0	0	0	0	0	0	0	0	0	0	0
SIXTH	Halopenitus	7	5	0	0	0	0	0	0	0	0	0	0	0	NA	0	NA	0	0	0	0	0	0	0	0	0	0	0	0	0	0
SEVENTH	unclassified_Halopenitus	2	2	0	0	0	0	0	0	0	0	0	0	0	NA	0	NA	0	0	0	0	0	0	0	0	0	0	0	0	0	0
SIXTH	Haloplanus	20	15	0	0	0	0	0	0	0	0	0	0	0	NA	0	NA	0	0	0	0	0	0	0	0	0	0	0	0	0	0
SEVENTH	unclassified_Haloplanus	6	6	0	0	0	0	0	0	0	0	0	0	0	NA	0	NA	0	0	0	0	0	0	0	0	0	0	0	0	0	0
SIXTH	Haloprofundus	6	6	0	0	0	0	0	0	0	0	0	0	0	NA	0	NA	0	0	0	0	0	0	0	0	0	0	0	0	0	0
SEVENTH	unclassified_Haloprofundus	1	1	0	0	0	0	0	0	0	0	0	0	0	NA	0	NA	0	0	0	0	0	0	0	0	0	0	0	0	0	0
SIXTH	Haloquadratum	7	1	0	0	0	0	0	0	0	0	0	0	0	NA	0	NA	0	0	0	0	0	0	0	0	0	0	0	0	0	0
SIXTH	Halorarum	2	2	0	0	0	0	0	0	0	0	0	0	0	NA	0	NA	0	0	0	0	0	0	0	0	0	0	0	0	0	0
SIXTH	Halorubrum	151	85	0	0	0	0	0	0	0	0	0	0	0	NA	0	NA	0	0	0	0	0	0	0	0	0	0	0	0	0	0
SEVENTH	environmental_samples	1	1	0	0	0	0	0	0	0	0	0	0	0	NA	0	NA	0	0	0	0	0	0	0	0	0	0	0	0	0	0
SEVENTH	unclassified_Halorubrum	44	42	0	0	0	0	0	0	0	0	0	0	0	NA	0	NA	0	0	0	0	0	0	0	0	0	0	0	0	0	0
SIXTH	Natronocalculus	1	1	0	0	0	0	0	0	0	0	0	0	0	NA	0	NA	0	0	0	0	0	0	0	0	0	0	0	0	0	0
SIXTH	Salinigranum	8	6	0	0	0	0	0	0	0	0	0	0	0	NA	0	NA	0	0	0	0	0	0	0	0	0	0	0	0	0	0
SEVENTH	unclassified_Salinigranum	2	2	0	0	0	0	0	0	0	0	0	0	0	NA	0	NA	0	0	0	0	0	0	0	0	0	0	0	0	0	0
SIXTH	Salinirubrum	2	1	0	0	0	0	0	0	0	0	0	0	0	NA	0	NA	0	0	0	0	0	0	0	0	0	0	0	0	0	0
FIFTH	Halorubellaceae	15	10	0	0	0	0	0	0	0	0	0	0	0	NA	0	NA	0	0	0	0	0	0	0	0	0	0	0	0	0	0
SIXTH	Haloarchaeobius	10	6	0	0	0	0	0	0	0	0	0	0	0	NA	0	NA	0	0	0	0	0	0	0	0	0	0	0	0	0	0
SEVENTH	unclassified_Haloarchaeobius	2	2	0	0	0	0	0	0	0	0	0	0	0	NA	0	NA	0	0	0	0	0	0	0	0	0	0	0	0	0	0
SIXTH	Halorubellus	5	4	0	0	0	0	0	0	0	0	0	0	0	NA	0	NA	0	0	0	0	0	0	0	0	0	0	0	0	0	0
SEVENTH	unclassified_Halorubellus	2	2	0	0	0	0	0	0	0	0	0	0	0	NA	0	NA	0	0	0	0	0	0	0	0	0	0	0	0	0	0
FIFTH	Natrialbaceae	150	119	0	0	0	0	0	0	0	0	0	0	0	NA	0	NA	0	0	0	0	0	0	0	0	0	0	0	0	0	0
SIXTH	Halobiforma	4	3	0	0	0	0	0	0	0	0	0	0	0	NA	0	NA	0	0	0	0	0	0	0	0	0	0	0	0	0	0
SIXTH	Halomontanus	2	1	0	0	0	0	0	0	0	0	0	0	0	NA	0	NA	0	0	0	0	0	0	0	0	0	0	0	0	0	0
SIXTH	Halopiger	4	4	0	0	0	0	0	0	0	0	0	0	0	NA	0	NA	0	0	0	0	0	0	0	0	0	0	0	0	0	0
SIXTH	Halosolutus	4	3	0	0	0	0	0	0	0	0	0	0	0	NA	0	NA	0	0	0	0	0	0	0	0	0	0	0	0	0	0
SIXTH	Halostagnicola	6	6	0	0	0	0	0	0	0	0	0	0	0	NA	0	NA	0	0	0	0	0	0	0	0	0	0	0	0	0	0
SEVENTH	unclassified_Halostagnicola	4	4	0	0	0	0	0	0	0	0	0	0	0	NA	0	NA	0	0	0	0	0	0	0	0	0	0	0	0	0	0
SIXTH	Haloterrigena	9	7	0	0	0	0	0	0	0	0	0	0	0	NA	0	NA	0	0	0	0	0	0	0	0	0	0	0	0	0	0
SEVENTH	unclassified_Haloterrigena	2	2	0	0	0	0	0	0	0	0	0	0	0	NA	0	NA	0	0	0	0	0	0	0	0	0	0	0	0	0	0
SIXTH	Halovivax	7	6	0	0	0	0	0	0	0	0	0	0	0	NA	0	NA	0	0	0	0	0	0	0	0	0	0	0	0	0	0
SEVENTH	unclassified_Halovivax	1	1	0	0	0	0	0	0	0	0	0	0	0	NA	0	NA	0	0	0	0	0	0	0	0	0	0	0	0	0	0
SIXTH	Natrarchaeobaculum	4	3	0	0	0	0	0	0	0	0	0	0	0	NA	0	NA	0	0	0	0	0	0	0	0	0	0	0	0	0	0
SEVENTH	unclassified_Natrarchaeobaculum	1	1	0	0	0	0	0	0	0	0	0	0	0	NA	0	NA	0	0	0	0	0	0	0	0	0	0	0	0	0	0
SIXTH	Natrarchaeobius	4	3	0	0	0	0	0	0	0	0	0	0	0	NA	0	NA	0	0	0	0	0	0	0	0	0	0	0	0	0	0
SEVENTH	unclassified_Natrarchaeobius	1	1	0	0	0	0	0	0	0	0	0	0	0	NA	0	NA	0	0	0	0	0	0	0	0	0	0	0	0	0	0
SIXTH	Natrialba	11	10	0	0	0	0	0	0	0	0	0	0	0	NA	0	NA	0	0	0	0	0	0	0	0	0	0	0	0	0	0
SEVENTH	unclassified_Natrialba	3	3	0	0	0	0	0	0	0	0	0	0	0	NA	0	NA	0	0	0	0	0	0	0	0	0	0	0	0	0	0
SIXTH	Natribaculum	2	1	0	0	0	0	0	0	0	0	0	0	0	NA	0	NA	0	0	0	0	0	0	0	0	0	0	0	0	0	0
SIXTH	Natrinema	42	31	0	0	0	0	0	0	0	0	0	0	0	NA	0	NA	0	0	0	0	0	0	0	0	0	0	0	0	0	0
SEVENTH	unclassified_Natrinema	9	9	0	0	0	0	0	0	0	0	0	0	0	NA	0	NA	0	0	0	0	0	0	0	0	0	0	0	0	0	0
SIXTH	Natronobacterium	5	2	0	0	0	0	0	0	0	0	0	0	0	NA	0	NA	0	0	0	0	0	0	0	0	0	0	0	0	0	0
SIXTH	Natronobeatus	1	1	0	0	0	0	0	0	0	0	0	0	0	NA	0	NA	0	0	0	0	0	0	0	0	0	0	0	0	0	0
SIXTH	Natronobiforma	1	1	0	0	0	0	0	0	0	0	0	0	0	NA	0	NA	0	0	0	0	0	0	0	0	0	0	0	0	0	0
SIXTH	Natronococcus	10	10	0	0	0	0	0	0	0	0	0	0	0	NA	0	NA	0	0	0	0	0	0	0	0	0	0	0	0	0	0
SEVENTH	unclassified_Natronococcus	6	6	0	0	0	0	0	0	0	0	0	0	0	NA	0	NA	0	0	0	0	0	0	0	0	0	0	0	0	0	0
SIXTH	Natronoglomus	2	1	0	0	0	0	0	0	0	0	0	0	0	NA	0	NA	0	0	0	0	0	0	0	0	0	0	0	0	0	0
SIXTH	Natronolimnobius	2	2	0	0	0	0	0	0	0	0	0	0	0	NA	0	NA	0	0	0	0	0	0	0	0	0	0	0	0	0	0
SEVENTH	unclassified_Natronolimnobius	1	1	0	0	0	0	0	0	0	0	0	0	0	NA	0	NA	0	0	0	0	0	0	0	0	0	0	0	0	0	0
SIXTH	Natronolimnohabitans	2	2	0	0	0	0	0	0	0	0	0	0	0	NA	0	NA	0	0	0	0	0	0	0	0	0	0	0	0	0	0
SEVENTH	unclassified_Natronolimnohabitans	1	1	0	0	0	0	0	0	0	0	0	0	0	NA	0	NA	0	0	0	0	0	0	0	0	0	0	0	0	0	0
SIXTH	Natrononativus	1	1	0	0	0	0	0	0	0	0	0	0	0	NA	0	NA	0	0	0	0	0	0	0	0	0	0	0	0	0	0
SIXTH	Natronorubrum	15	11	0	0	0	0	0	0	0	0	0	0	0	NA	0	NA	0	0	0	0	0	0	0	0	0	0	0	0	0	0
SEVENTH	unclassified_Natronorubrum	1	1	0	0	0	0	0	0	0	0	0	0	0	NA	0	NA	0	0	0	0	0	0	0	0	0	0	0	0	0	0
SIXTH	Natronosalvus	6	6	0	0	0	0	0	0	0	0	0	0	0	NA	0	NA	0	0	0	0	0	0	0	0	0	0	0	0	0	0
SIXTH	Salinadaptatus	1	1	0	0	0	0	0	0	0	0	0	0	0	NA	0	NA	0	0	0	0	0	0	0	0	0	0	0	0	0	0
SIXTH	Salinilacihabitans	1	1	0	0	0	0	0	0	0	0	0	0	0	NA	0	NA	0	0	0	0	0	0	0	0	0	0	0	0	0	0
SIXTH	Saliphagus	4	2	0	0	0	0	0	0	0	0	0	0	0	NA	0	NA	0	0	0	0	0	0	0	0	0	0	0	0	0	0
SEVENTH	unclassified_Saliphagus	1	1	0	0	0	0	0	0	0	0	0	0	0	NA	0	NA	0	0	0	0	0	0	0	0	0	0	0	0	0	0
FIFTH	Natronoarchaeaceae	17	16	0	0	0	0	0	0	0	0	0	0	0	NA	0	NA	0	0	0	0	0	0	0	0	0	0	0	0	0	0
SIXTH	Halostella	6	6	0	0	0	0	0	0	0	0	0	0	0	NA	0	NA	0	0	0	0	0	0	0	0	0	0	0	0	0	0
SEVENTH	unclassified_Halostella	2	2	0	0	0	0	0	0	0	0	0	0	0	NA	0	NA	0	0	0	0	0	0	0	0	0	0	0	0	0	0
SIXTH	Natranaeroarchaeum	2	2	0	0	0	0	0	0	0	0	0	0	0	NA	0	NA	0	0	0	0	0	0	0	0	0	0	0	0	0	0
SIXTH	Natronoarchaeum	6	5	0	0	0	0	0	0	0	0	0	0	0	NA	0	NA	0	0	0	0	0	0	0	0	0	0	0	0	0	0
SEVENTH	unclassified_Natronoarchaeum	2	2	0	0	0	0	0	0	0	0	0	0	0	NA	0	NA	0	0	0	0	0	0	0	0	0	0	0	0	0	0
SIXTH	Salinarchaeum	3	3	0	0	0	0	0	0	0	0	0	0	0	NA	0	NA	0	0	0	0	0	0	0	0	0	0	0	0	0	0
SEVENTH	unclassified_Salinarchaeum	2	2	0	0	0	0	0	0	0	0	0	0	0	NA	0	NA	0	0	0	0	0	0	0	0	0	0	0	0	0	0
FORTH	Halorutilales	1	1	0	0	0	0	0	0	0	0	0	0	0	NA	0	NA	0	0	0	0	0	0	0	0	0	0	0	0	0	0
FIFTH	Halorutilaceae	1	1	0	0	0	0	0	0	0	0	0	0	0	NA	0	NA	0	0	0	0	0	0	0	0	0	0	0	0	0	0
SIXTH	Halorutilus	1	1	0	0	0	0	0	0	0	0	0	0	0	NA	0	NA	0	0	0	0	0	0	0	0	0	0	0	0	0	0
THIRD	Methanobacteria	338	73	0	0	0	0	0	0	0	0	0	0	0	NA	0	NA	0	0	0	0	0	0	0	0	0	0	0	0	0	0
FORTH	Methanobacteriales	338	73	0	0	0	0	0	0	0	0	0	0	0	NA	0	NA	0	0	0	0	0	0	0	0	0	0	0	0	0	0
FIFTH	Methanobacteriaceae	338	73	0	0	0	0	0	0	0	0	0	0	0	NA	0	NA	0	0	0	0	0	0	0	0	0	0	0	0	0	0
SIXTH	Methanobacterium	43	22	0	0	0	0	0	0	0	0	0	0	0	NA	0	NA	0	0	0	0	0	0	0	0	0	0	0	0	0	0
SEVENTH	environmental_samples	3	1	0	0	0	0	0	0	0	0	0	0	0	NA	0	NA	0	0	0	0	0	0	0	0	0	0	0	0	0	0
SEVENTH	unclassified_Methanobacterium	12	7	0	0	0	0	0	0	0	0	0	0	0	NA	0	NA	0	0	0	0	0	0	0	0	0	0	0	0	0	0
SIXTH	Methanobrevibacter	243	27	0	0	0	0	0	0	0	0	0	0	0	NA	0	NA	0	0	0	0	0	0	0	0	0	0	0	0	0	0
SEVENTH	environmental_samples	63	1	0	0	0	0	0	0	0	0	0	0	0	NA	0	NA	0	0	0	0	0	0	0	0	0	0	0	0	0	0
SEVENTH	unclassified_Methanobrevibacter	42	12	0	0	0	0	0	0	0	0	0	0	0	NA	0	NA	0	0	0	0	0	0	0	0	0	0	0	0	0	0
SIXTH	Methanosphaera	29	10	0	0	0	0	0	0	0	0	0	0	0	NA	0	NA	0	0	0	0	0	0	0	0	0	0	0	0	0	0
SEVENTH	environmental_samples	6	1	0	0	0	0	0	0	0	0	0	0	0	NA	0	NA	0	0	0	0	0	0	0	0	0	0	0	0	0	0
SEVENTH	unclassified_Methanosphaera	11	6	0	0	0	0	0	0	0	0	0	0	0	NA	0	NA	0	0	0	0	0	0	0	0	0	0	0	0	0	0
SIXTH	Methanothermobacter	23	14	0	0	0	0	0	0	0	0	0	0	0	NA	0	NA	0	0	0	0	0	0	0	0	0	0	0	0	0	0
SEVENTH	unclassified_Methanothermobacter	10	9	0	0	0	0	0	0	0	0	0	0	0	NA	0	NA	0	0	0	0	0	0	0	0	0	0	0	0	0	0
THIRD	Methanococci	54	20	0	0	0	0	0	0	0	0	0	0	0	NA	0	NA	0	0	0	0	0	0	0	0	0	0	0	0	0	0
FORTH	Methanococcales	54	20	0	0	0	0	0	0	0	0	0	0	0	NA	0	NA	0	0	0	0	0	0	0	0	0	0	0	0	0	0
FIFTH	Methanocaldococcaceae	12	11	0	0	0	0	0	0	0	0	0	0	0	NA	0	NA	0	0	0	0	0	0	0	0	0	0	0	0	0	0
SIXTH	Methanocaldococcus	10	9	0	0	0	0	0	0	0	0	0	0	0	NA	0	NA	0	0	0	0	0	0	0	0	0	0	0	0	0	0
SEVENTH	unclassified_Methanocaldococcus	2	2	0	0	0	0	0	0	0	0	0	0	0	NA	0	NA	0	0	0	0	0	0	0	0	0	0	0	0	0	0
SIXTH	Methanotorris	2	2	0	0	0	0	0	0	0	0	0	0	0	NA	0	NA	0	0	0	0	0	0	0	0	0	0	0	0	0	0
FIFTH	Methanococcaceae	40	7	0	0	0	0	0	0	0	0	0	0	0	NA	0	NA	0	0	0	0	0	0	0	0	0	0	0	0	0	0
SIXTH	Methanococcus	35	4	0	0	0	0	0	0	0	0	0	0	0	NA	0	NA	0	0	0	0	0	0	0	0	0	0	0	0	0	0
SIXTH	Methanothermococcus	5	3	0	0	0	0	0	0	0	0	0	0	0	NA	0	NA	0	0	0	0	0	0	0	0	0	0	0	0	0	0
SEVENTH	unclassified_Methanothermococcus	2	1	0	0	0	0	0	0	0	0	0	0	0	NA	0	NA	0	0	0	0	0	0	0	0	0	0	0	0	0	0
FIFTH	Methanococcales_incertae_sedis	2	2	0	0	0	0	0	0	0	0	0	0	0	NA	0	NA	0	0	0	0	0	0	0	0	0	0	0	0	0	0
SIXTH	Methanofervidicoccus	2	2	0	0	0	0	0	0	0	0	0	0	0	NA	0	NA	0	0	0	0	0	0	0	0	0	0	0	0	0	0
SEVENTH	unclassified_Methanofervidicoccus	1	1	0	0	0	0	0	0	0	0	0	0	0	NA	0	NA	0	0	0	0	0	0	0	0	0	0	0	0	0	0
THIRD	Methanomicrobia	385	191	0	0	0	0	0	0	0	0	0	0	0	NA	0	NA	0	0	0	0	0	0	0	0	0	0	0	0	0	0
FORTH	Methanocellales	7	5	0	0	0	0	0	0	0	0	0	0	0	NA	0	NA	0	0	0	0	0	0	0	0	0	0	0	0	0	0
FIFTH	Methanocellaceae	7	5	0	0	0	0	0	0	0	0	0	0	0	NA	0	NA	0	0	0	0	0	0	0	0	0	0	0	0	0	0
SIXTH	Methanocella	6	4	0	0	0	0	0	0	0	0	0	0	0	NA	0	NA	0	0	0	0	0	0	0	0	0	0	0	0	0	0
SEVENTH	unclassified_Methanocella	1	1	0	0	0	0	0	0	0	0	0	0	0	NA	0	NA	0	0	0	0	0	0	0	0	0	0	0	0	0	0
SIXTH	Methanooceanicella	1	1	0	0	0	0	0	0	0	0	0	0	0	NA	0	NA	0	0	0	0	0	0	0	0	0	0	0	0	0	0
FORTH	Methanomicrobiales	143	93	0	0	0	0	0	0	0	0	0	0	0	NA	0	NA	0	0	0	0	0	0	0	0	0	0	0	0	0	0
FIFTH	Methanocalculaceae	11	8	0	0	0	0	0	0	0	0	0	0	0	NA	0	NA	0	0	0	0	0	0	0	0	0	0	0	0	0	0
SIXTH	Methanocalculus	11	8	0	0	0	0	0	0	0	0	0	0	0	NA	0	NA	0	0	0	0	0	0	0	0	0	0	0	0	0	0
SEVENTH	unclassified_Methanocalculus	7	4	0	0	0	0	0	0	0	0	0	0	0	NA	0	NA	0	0	0	0	0	0	0	0	0	0	0	0	0	0
FIFTH	Methanocorpusculaceae	11	10	0	0	0	0	0	0	0	0	0	0	0	NA	0	NA	0	0	0	0	0	0	0	0	0	0	0	0	0	0
SIXTH	Methanocorpusculum	9	8	0	0	0	0	0	0	0	0	0	0	0	NA	0	NA	0	0	0	0	0	0	0	0	0	0	0	0	0	0
SEVENTH	environmental_samples	1	1	0	0	0	0	0	0	0	0	0	0	0	NA	0	NA	0	0	0	0	0	0	0	0	0	0	0	0	0	0
SEVENTH	unclassified_Methanocorpusculum	3	2	0	0	0	0	0	0	0	0	0	0	0	NA	0	NA	0	0	0	0	0	0	0	0	0	0	0	0	0	0
SIXTH	Methanorbis	2	2	0	0	0	0	0	0	0	0	0	0	0	NA	0	NA	0	0	0	0	0	0	0	0	0	0	0	0	0	0
FIFTH	Methanomicrobiaceae	85	60	0	0	0	0	0	0	0	0	0	0	0	NA	0	NA	0	0	0	0	0	0	0	0	0	0	0	0	0	0
SIXTH	Methanoculleus	61	36	0	0	0	0	0	0	0	0	0	0	0	NA	0	NA	0	0	0	0	0	0	0	0	0	0	0	0	0	0
SEVENTH	environmental_samples	1	1	0	0	0	0	0	0	0	0	0	0	0	NA	0	NA	0	0	0	0	0	0	0	0	0	0	0	0	0	0
SEVENTH	unclassified_Methanoculleus	38	20	0	0	0	0	0	0	0	0	0	0	0	NA	0	NA	0	0	0	0	0	0	0	0	0	0	0	0	0	0
SIXTH	Methanofollis	10	10	0	0	0	0	0	0	0	0	0	0	0	NA	0	NA	0	0	0	0	0	0	0	0	0	0	0	0	0	0
SEVENTH	environmental_samples	1	1	0	0	0	0	0	0	0	0	0	0	0	NA	0	NA	0	0	0	0	0	0	0	0	0	0	0	0	0	0
SEVENTH	unclassified_Methanofollis	3	3	0	0	0	0	0	0	0	0	0	0	0	NA	0	NA	0	0	0	0	0	0	0	0	0	0	0	0	0	0
SIXTH	Methanogenium	5	5	0	0	0	0	0	0	0	0	0	0	0	NA	0	NA	0	0	0	0	0	0	0	0	0	0	0	0	0	0
SEVENTH	unclassified_Methanogenium	2	2	0	0	0	0	0	0	0	0	0	0	0	NA	0	NA	0	0	0	0	0	0	0	0	0	0	0	0	0	0
SIXTH	Methanolacinia	2	2	0	0	0	0	0	0	0	0	0	0	0	NA	0	NA	0	0	0	0	0	0	0	0	0	0	0	0	0	0
SIXTH	Methanomicrobium	3	3	0	0	0	0	0	0	0	0	0	0	0	NA	0	NA	0	0	0	0	0	0	0	0	0	0	0	0	0	0
SEVENTH	unclassified_Methanomicrobium	1	1	0	0	0	0	0	0	0	0	0	0	0	NA	0	NA	0	0	0	0	0	0	0	0	0	0	0	0	0	0
SIXTH	Methanoplanus	3	3	0	0	0	0	0	0	0	0	0	0	0	NA	0	NA	0	0	0	0	0	0	0	0	0	0	0	0	0	0
SEVENTH	unclassified_Methanoplanus	1	1	0	0	0	0	0	0	0	0	0	0	0	NA	0	NA	0	0	0	0	0	0	0	0	0	0	0	0	0	0
SIXTH	Methanovulcanius	1	1	0	0	0	0	0	0	0	0	0	0	0	NA	0	NA	0	0	0	0	0	0	0	0	0	0	0	0	0	0
FIFTH	Methanoregulaceae	19	9	0	0	0	0	0	0	0	0	0	0	0	NA	0	NA	0	0	0	0	0	0	0	0	0	0	0	0	0	0
SIXTH	Methanolinea	1	1	0	0	0	0	0	0	0	0	0	0	0	NA	0	NA	0	0	0	0	0	0	0	0	0	0	0	0	0	0
SIXTH	Methanoregula	17	7	0	0	0	0	0	0	0	0	0	0	0	NA	0	NA	0	0	0	0	0	0	0	0	0	0	0	0	0	0
SEVENTH	environmental_samples	4	1	0	0	0	0	0	0	0	0	0	0	0	NA	0	NA	0	0	0	0	0	0	0	0	0	0	0	0	0	0
SEVENTH	unclassified_Methanoregula	11	4	0	0	0	0	0	0	0	0	0	0	0	NA	0	NA	0	0	0	0	0	0	0	0	0	0	0	0	0	0
SIXTH	Methanosphaerula	1	1	0	0	0	0	0	0	0	0	0	0	0	NA	0	NA	0	0	0	0	0	0	0	0	0	0	0	0	0	0
FIFTH	Methanospirillaceae	17	6	0	0	0	0	0	0	0	0	0	0	0	NA	0	NA	0	0	0	0	0	0	0	0	0	0	0	0	0	0
SIXTH	Methanospirillum	17	6	0	0	0	0	0	0	0	0	0	0	0	NA	0	NA	0	0	0	0	0	0	0	0	0	0	0	0	0	0
SEVENTH	environmental_samples	2	1	0	0	0	0	0	0	0	0	0	0	0	NA	0	NA	0	0	0	0	0	0	0	0	0	0	0	0	0	0
SEVENTH	unclassified_Methanospirillum	8	2	0	0	0	0	0	0	0	0	0	0	0	NA	0	NA	0	0	0	0	0	0	0	0	0	0	0	0	0	0
FORTH	Methanosarcinales	195	85	0	0	0	0	0	0	0	0	0	0	0	NA	0	NA	0	0	0	0	0	0	0	0	0	0	0	0	0	0
FIFTH	Candidatus_Methanoperedenaceae	3	2	0	0	0	0	0	0	0	0	0	0	0	NA	0	NA	0	0	0	0	0	0	0	0	0	0	0	0	0	0
SIXTH	Candidatus_Methanoperedens	3	2	0	0	0	0	0	0	0	0	0	0	0	NA	0	NA	0	0	0	0	0	0	0	0	0	0	0	0	0	0
SEVENTH	unclassified_Candidatus_Methanoperedens	1	1	0	0	0	0	0	0	0	0	0	0	0	NA	0	NA	0	0	0	0	0	0	0	0	0	0	0	0	0	0
FIFTH	Methanosarcinaceae	190	82	0	0	0	0	0	0	0	0	0	0	0	NA	0	NA	0	0	0	0	0	0	0	0	0	0	0	0	0	0
SIXTH	Methanimicrococcus	6	4	0	0	0	0	0	0	0	0	0	0	0	NA	0	NA	0	0	0	0	0	0	0	0	0	0	0	0	0	0
SIXTH	Methanococcoides	14	10	0	0	0	0	0	0	0	0	0	0	0	NA	0	NA	0	0	0	0	0	0	0	0	0	0	0	0	0	0
SEVENTH	unclassified_Methanococcoides	4	4	0	0	0	0	0	0	0	0	0	0	0	NA	0	NA	0	0	0	0	0	0	0	0	0	0	0	0	0	0
SIXTH	Methanohalobium	2	2	0	0	0	0	0	0	0	0	0	0	0	NA	0	NA	0	0	0	0	0	0	0	0	0	0	0	0	0	0
SEVENTH	unclassified_Methanohalobium	1	1	0	0	0	0	0	0	0	0	0	0	0	NA	0	NA	0	0	0	0	0	0	0	0	0	0	0	0	0	0
SIXTH	Methanohalophilus	19	11	0	0	0	0	0	0	0	0	0	0	0	NA	0	NA	0	0	0	0	0	0	0	0	0	0	0	0	0	0
SEVENTH	unclassified_Methanohalophilus	5	5	0	0	0	0	0	0	0	0	0	0	0	NA	0	NA	0	0	0	0	0	0	0	0	0	0	0	0	0	0
SIXTH	Methanolapillus	3	3	0	0	0	0	0	0	0	0	0	0	0	NA	0	NA	0	0	0	0	0	0	0	0	0	0	0	0	0	0
SIXTH	Methanolobus	20	14	0	0	0	0	0	0	0	0	0	0	0	NA	0	NA	0	0	0	0	0	0	0	0	0	0	0	0	0	0
SEVENTH	environmental_samples	3	1	0	0	0	0	0	0	0	0	0	0	0	NA	0	NA	0	0	0	0	0	0	0	0	0	0	0	0	0	0
SEVENTH	unclassified_Methanolobus	6	3	0	0	0	0	0	0	0	0	0	0	0	NA	0	NA	0	0	0	0	0	0	0	0	0	0	0	0	0	0
SIXTH	Methanomethylovorans	10	4	0	0	0	0	0	0	0	0	0	0	0	NA	0	NA	0	0	0	0	0	0	0	0	0	0	0	0	0	0
SEVENTH	environmental_samples	2	1	0	0	0	0	0	0	0	0	0	0	0	NA	0	NA	0	0	0	0	0	0	0	0	0	0	0	0	0	0
SEVENTH	unclassified_Methanomethylovorans	7	2	0	0	0	0	0	0	0	0	0	0	0	NA	0	NA	0	0	0	0	0	0	0	0	0	0	0	0	0	0
SIXTH	Methanosalsum	2	2	0	0	0	0	0	0	0	0	0	0	0	NA	0	NA	0	0	0	0	0	0	0	0	0	0	0	0	0	0
SIXTH	Methanosarcina	114	32	0	0	0	0	0	0	0	0	0	0	0	NA	0	NA	0	0	0	0	0	0	0	0	0	0	0	0	0	0
SEVENTH	unclassified_Methanosarcina	26	21	0	0	0	0	0	0	0	0	0	0	0	NA	0	NA	0	0	0	0	0	0	0	0	0	0	0	0	0	0
FIFTH	Methermicoccaceae	2	1	0	0	0	0	0	0	0	0	0	0	0	NA	0	NA	0	0	0	0	0	0	0	0	0	0	0	0	0	0
SIXTH	Methermicoccus	2	1	0	0	0	0	0	0	0	0	0	0	0	NA	0	NA	0	0	0	0	0	0	0	0	0	0	0	0	0	0
FORTH	Methanotrichales	40	8	0	0	0	0	0	0	0	0	0	0	0	NA	0	NA	0	0	0	0	0	0	0	0	0	0	0	0	0	0
FIFTH	Methanotrichaceae	40	8	0	0	0	0	0	0	0	0	0	0	0	NA	0	NA	0	0	0	0	0	0	0	0	0	0	0	0	0	0
SIXTH	Methanocrinis	2	2	0	0	0	0	0	0	0	0	0	0	0	NA	0	NA	0	0	0	0	0	0	0	0	0	0	0	0	0	0
SIXTH	Methanothrix	38	6	0	0	0	0	0	0	0	0	0	0	0	NA	0	NA	0	0	0	0	0	0	0	0	0	0	0	0	0	0
SEVENTH	unclassified_Methanothrix	18	3	0	0	0	0	0	0	0	0	0	0	0	NA	0	NA	0	0	0	0	0	0	0	0	0	0	0	0	0	0
THIRD	Methanonatronarchaeia	3	3	0	0	0	0	0	0	0	0	0	0	0	NA	0	NA	0	0	0	0	0	0	0	0	0	0	0	0	0	0
FORTH	Methanonatronarchaeales	3	3	0	0	0	0	0	0	0	0	0	0	0	NA	0	NA	0	0	0	0	0	0	0	0	0	0	0	0	0	0
FIFTH	Methanonatronarchaeaceae	3	3	0	0	0	0	0	0	0	0	0	0	0	NA	0	NA	0	0	0	0	0	0	0	0	0	0	0	0	0	0
SIXTH	Methanonatronarchaeum	3	3	0	0	0	0	0	0	0	0	0	0	0	NA	0	NA	0	0	0	0	0	0	0	0	0	0	0	0	0	0
SEVENTH	unclassified_Methanonatronarchaeum	2	2	0	0	0	0	0	0	0	0	0	0	0	NA	0	NA	0	0	0	0	0	0	0	0	0	0	0	0	0	0
THIRD	Methanopyri	4	3	0	0	0	0	0	0	0	0	0	0	0	NA	0	NA	0	0	0	0	0	0	0	0	0	0	0	0	0	0
FORTH	Methanopyrales	4	3	0	0	0	0	0	0	0	0	0	0	0	NA	0	NA	0	0	0	0	0	0	0	0	0	0	0	0	0	0
FIFTH	Methanopyraceae	4	3	0	0	0	0	0	0	0	0	0	0	0	NA	0	NA	0	0	0	0	0	0	0	0	0	0	0	0	0	0
SIXTH	Methanopyrus	4	3	0	0	0	0	0	0	0	0	0	0	0	NA	0	NA	0	0	0	0	0	0	0	0	0	0	0	0	0	0
SEVENTH	unclassified_Methanopyrus	2	2	0	0	0	0	0	0	0	0	0	0	0	NA	0	NA	0	0	0	0	0	0	0	0	0	0	0	0	0	0
THIRD	Thermococci	128	76	0	0	0	0	0	0	0	0	0	0	0	NA	0	NA	0	0	0	0	0	0	0	0	0	0	0	0	0	0
FORTH	Thermococcales	128	76	0	0	0	0	0	0	0	0	0	0	0	NA	0	NA	0	0	0	0	0	0	0	0	0	0	0	0	0	0
FIFTH	Thermococcaceae	128	76	0	0	0	0	0	0	0	0	0	0	0	NA	0	NA	0	0	0	0	0	0	0	0	0	0	0	0	0	0
SIXTH	Palaeococcus	3	3	0	0	0	0	0	0	0	0	0	0	0	NA	0	NA	0	0	0	0	0	0	0	0	0	0	0	0	0	0
SEVENTH	unclassified_Palaeococcus_in_euryarchaeotes	1	1	0	0	0	0	0	0	0	0	0	0	0	NA	0	NA	0	0	0	0	0	0	0	0	0	0	0	0	0	0
SIXTH	Pyrococcus	22	8	0	0	0	0	0	0	0	0	0	0	0	NA	0	NA	0	0	0	0	0	0	0	0	0	0	0	0	0	0
SEVENTH	unclassified_Pyrococcus	3	3	0	0	0	0	0	0	0	0	0	0	0	NA	0	NA	0	0	0	0	0	0	0	0	0	0	0	0	0	0
SIXTH	Thermococcus	103	65	0	0	0	0	0	0	0	0	0	0	0	NA	0	NA	0	0	0	0	0	0	0	0	0	0	0	0	0	0
SEVENTH	unclassified_Thermococcus	58	30	0	0	0	0	0	0	0	0	0	0	0	NA	0	NA	0	0	0	0	0	0	0	0	0	0	0	0	0	0
SECOND	Nanoarchaeota	3	3	0	0	0	0	0	0	0	0	0	0	0	NA	0	NA	0	0	0	0	0	0	0	0	0	0	0	0	0	0
THIRD	Candidatus_Nanoarchaeia	2	2	0	0	0	0	0	0	0	0	0	0	0	NA	0	NA	0	0	0	0	0	0	0	0	0	0	0	0	0	0
FORTH	Nanoarchaeales	2	2	0	0	0	0	0	0	0	0	0	0	0	NA	0	NA	0	0	0	0	0	0	0	0	0	0	0	0	0	0
FIFTH	Nanopusillaceae	2	2	0	0	0	0	0	0	0	0	0	0	0	NA	0	NA	0	0	0	0	0	0	0	0	0	0	0	0	0	0
SIXTH	Candidatus_Nanobsidianus	1	1	0	0	0	0	0	0	0	0	0	0	0	NA	0	NA	0	0	0	0	0	0	0	0	0	0	0	0	0	0
SIXTH	Candidatus_Nanopusillus	1	1	0	0	0	0	0	0	0	0	0	0	0	NA	0	NA	0	0	0	0	0	0	0	0	0	0	0	0	0	0
THIRD	Nanobdellia	1	1	0	0	0	0	0	0	0	0	0	0	0	NA	0	NA	0	0	0	0	0	0	0	0	0	0	0	0	0	0
FORTH	Nanobdellales	1	1	0	0	0	0	0	0	0	0	0	0	0	NA	0	NA	0	0	0	0	0	0	0	0	0	0	0	0	0	0
FIFTH	Nanobdellaceae	1	1	0	0	0	0	0	0	0	0	0	0	0	NA	0	NA	0	0	0	0	0	0	0	0	0	0	0	0	0	0
SIXTH	Nanobdella	1	1	0	0	0	0	0	0	0	0	0	0	0	NA	0	NA	0	0	0	0	0	0	0	0	0	0	0	0	0	0
SECOND	Nitrososphaerota	70	48	0	0	0	0	0	0	0	0	0	0	0	NA	0	NA	0	0	0	0	0	0	0	0	0	0	0	0	0	0
THIRD	Conexivisphaeria	1	1	0	0	0	0	0	0	0	0	0	0	0	NA	0	NA	0	0	0	0	0	0	0	0	0	0	0	0	0	0
FORTH	Conexivisphaerales	1	1	0	0	0	0	0	0	0	0	0	0	0	NA	0	NA	0	0	0	0	0	0	0	0	0	0	0	0	0	0
FIFTH	Conexivisphaeraceae	1	1	0	0	0	0	0	0	0	0	0	0	0	NA	0	NA	0	0	0	0	0	0	0	0	0	0	0	0	0	0
SIXTH	Conexivisphaera	1	1	0	0	0	0	0	0	0	0	0	0	0	NA	0	NA	0	0	0	0	0	0	0	0	0	0	0	0	0	0
THIRD	Nitrososphaeria	54	36	0	0	0	0	0	0	0	0	0	0	0	NA	0	NA	0	0	0	0	0	0	0	0	0	0	0	0	0	0
FORTH	Candidatus_Nitrosocaldales	2	2	0	0	0	0	0	0	0	0	0	0	0	NA	0	NA	0	0	0	0	0	0	0	0	0	0	0	0	0	0
FIFTH	Candidatus_Nitrosocaldaceae	2	2	0	0	0	0	0	0	0	0	0	0	0	NA	0	NA	0	0	0	0	0	0	0	0	0	0	0	0	0	0
SIXTH	Candidatus_Nitrosocaldus	2	2	0	0	0	0	0	0	0	0	0	0	0	NA	0	NA	0	0	0	0	0	0	0	0	0	0	0	0	0	0
FORTH	Nitrosopumilales	35	23	0	0	0	0	0	0	0	0	0	0	0	NA	0	NA	0	0	0	0	0	0	0	0	0	0	0	0	0	0
FIFTH	Nitrosopumilaceae	35	23	0	0	0	0	0	0	0	0	0	0	0	NA	0	NA	0	0	0	0	0	0	0	0	0	0	0	0	0	0
SIXTH	Candidatus_Nitrosomarinus	1	1	0	0	0	0	0	0	0	0	0	0	0	NA	0	NA	0	0	0	0	0	0	0	0	0	0	0	0	0	0
SIXTH	Nitrosarchaeum	5	4	0	0	0	0	0	0	0	0	0	0	0	NA	0	NA	0	0	0	0	0	0	0	0	0	0	0	0	0	0
SEVENTH	unclassified_Nitrosarchaeum	3	2	0	0	0	0	0	0	0	0	0	0	0	NA	0	NA	0	0	0	0	0	0	0	0	0	0	0	0	0	0
SIXTH	Nitrosopumilus	29	18	0	0	0	0	0	0	0	0	0	0	0	NA	0	NA	0	0	0	0	0	0	0	0	0	0	0	0	0	0
SEVENTH	unclassified_Nitrosopumilus	17	8	0	0	0	0	0	0	0	0	0	0	0	NA	0	NA	0	0	0	0	0	0	0	0	0	0	0	0	0	0
FORTH	Nitrososphaerales	17	11	0	0	0	0	0	0	0	0	0	0	0	NA	0	NA	0	0	0	0	0	0	0	0	0	0	0	0	0	0
FIFTH	Nitrososphaeraceae	17	11	0	0	0	0	0	0	0	0	0	0	0	NA	0	NA	0	0	0	0	0	0	0	0	0	0	0	0	0	0
SIXTH	Candidatus_Nitrosocosmicus	6	5	0	0	0	0	0	0	0	0	0	0	0	NA	0	NA	0	0	0	0	0	0	0	0	0	0	0	0	0	0
SEVENTH	unclassified_Candidatus_Nitrosocosmicus	2	1	0	0	0	0	0	0	0	0	0	0	0	NA	0	NA	0	0	0	0	0	0	0	0	0	0	0	0	0	0
SIXTH	Nitrososphaera	11	6	0	0	0	0	0	0	0	0	0	0	0	NA	0	NA	0	0	0	0	0	0	0	0	0	0	0	0	0	0
SEVENTH	environmental_samples	1	1	0	0	0	0	0	0	0	0	0	0	0	NA	0	NA	0	0	0	0	0	0	0	0	0	0	0	0	0	0
SEVENTH	unclassified_Nitrososphaera	5	2	0	0	0	0	0	0	0	0	0	0	0	NA	0	NA	0	0	0	0	0	0	0	0	0	0	0	0	0	0
THIRD	Nitrososphaerota_incertae_sedis	15	11	0	0	0	0	0	0	0	0	0	0	0	NA	0	NA	0	0	0	0	0	0	0	0	0	0	0	0	0	0
FORTH	Candidatus_Nitrosopelagicus	2	1	0	0	0	0	0	0	0	0	0	0	0	NA	0	NA	0	0	0	0	0	0	0	0	0	0	0	0	0	0
FORTH	Candidatus_Nitrosotalea	5	5	0	0	0	0	0	0	0	0	0	0	0	NA	0	NA	0	0	0	0	0	0	0	0	0	0	0	0	0	0
FIFTH	unclassified_Candidatus_Nitrosotalea	2	2	0	0	0	0	0	0	0	0	0	0	0	NA	0	NA	0	0	0	0	0	0	0	0	0	0	0	0	0	0
FORTH	Candidatus_Nitrosotenuis	8	5	0	0	0	0	0	0	0	0	0	0	0	NA	0	NA	0	0	0	0	0	0	0	0	0	0	0	0	0	0
FIFTH	unclassified_Candidatus_Nitrosotenuis	1	1	0	0	0	0	0	0	0	0	0	0	0	NA	0	NA	0	0	0	0	0	0	0	0	0	0	0	0	0	0
SECOND	Thermoproteota	329	96	0	0	0	0	0	0	0	0	0	0	0	NA	0	NA	0	0	0	0	0	0	0	0	0	0	0	0	0	0
THIRD	Candidatus_Korarchaeia	3	2	0	0	0	0	0	0	0	0	0	0	0	NA	0	NA	0	0	0	0	0	0	0	0	0	0	0	0	0	0
FORTH	Candidatus_Korarchaeales	2	1	0	0	0	0	0	0	0	0	0	0	0	NA	0	NA	0	0	0	0	0	0	0	0	0	0	0	0	0	0
FIFTH	Candidatus_Korarchaeaceae	2	1	0	0	0	0	0	0	0	0	0	0	0	NA	0	NA	0	0	0	0	0	0	0	0	0	0	0	0	0	0
SIXTH	Candidatus_Korarchaeum	2	1	0	0	0	0	0	0	0	0	0	0	0	NA	0	NA	0	0	0	0	0	0	0	0	0	0	0	0	0	0
FORTH	Candidatus_Korarchaeia_incertae_sedis	1	1	0	0	0	0	0	0	0	0	0	0	0	NA	0	NA	0	0	0	0	0	0	0	0	0	0	0	0	0	0
FIFTH	Candidatus_Methanodesulfokores	1	1	0	0	0	0	0	0	0	0	0	0	0	NA	0	NA	0	0	0	0	0	0	0	0	0	0	0	0	0	0
THIRD	Thermoprotei	326	94	0	0	0	0	0	0	0	0	0	0	0	NA	0	NA	0	0	0	0	0	0	0	0	0	0	0	0	0	0
FORTH	Acidilobales	4	4	0	0	0	0	0	0	0	0	0	0	0	NA	0	NA	0	0	0	0	0	0	0	0	0	0	0	0	0	0
FIFTH	Acidilobaceae	2	2	0	0	0	0	0	0	0	0	0	0	0	NA	0	NA	0	0	0	0	0	0	0	0	0	0	0	0	0	0
SIXTH	Acidilobus	2	2	0	0	0	0	0	0	0	0	0	0	0	NA	0	NA	0	0	0	0	0	0	0	0	0	0	0	0	0	0
SEVENTH	unclassified_Acidilobus	1	1	0	0	0	0	0	0	0	0	0	0	0	NA	0	NA	0	0	0	0	0	0	0	0	0	0	0	0	0	0
FIFTH	Caldisphaeraceae	2	2	0	0	0	0	0	0	0	0	0	0	0	NA	0	NA	0	0	0	0	0	0	0	0	0	0	0	0	0	0
SIXTH	Caldisphaera	2	2	0	0	0	0	0	0	0	0	0	0	0	NA	0	NA	0	0	0	0	0	0	0	0	0	0	0	0	0	0
SEVENTH	unclassified_Caldisphaera	1	1	0	0	0	0	0	0	0	0	0	0	0	NA	0	NA	0	0	0	0	0	0	0	0	0	0	0	0	0	0
FORTH	Desulfurococcales	31	18	0	0	0	0	0	0	0	0	0	0	0	NA	0	NA	0	0	0	0	0	0	0	0	0	0	0	0	0	0
FIFTH	Desulfurococcaceae	24	12	0	0	0	0	0	0	0	0	0	0	0	NA	0	NA	0	0	0	0	0	0	0	0	0	0	0	0	0	0
SIXTH	Aeropyrum	4	2	0	0	0	0	0	0	0	0	0	0	0	NA	0	NA	0	0	0	0	0	0	0	0	0	0	0	0	0	0
SIXTH	Desulfurococcus	12	3	0	0	0	0	0	0	0	0	0	0	0	NA	0	NA	0	0	0	0	0	0	0	0	0	0	0	0	0	0
SEVENTH	unclassified_Desulfurococcus	6	1	0	0	0	0	0	0	0	0	0	0	0	NA	0	NA	0	0	0	0	0	0	0	0	0	0	0	0	0	0
SIXTH	Ignicoccus	2	2	0	0	0	0	0	0	0	0	0	0	0	NA	0	NA	0	0	0	0	0	0	0	0	0	0	0	0	0	0
SIXTH	Ignisphaera	1	1	0	0	0	0	0	0	0	0	0	0	0	NA	0	NA	0	0	0	0	0	0	0	0	0	0	0	0	0	0
SIXTH	Staphylothermus	2	2	0	0	0	0	0	0	0	0	0	0	0	NA	0	NA	0	0	0	0	0	0	0	0	0	0	0	0	0	0
SIXTH	Thermogladius	1	1	0	0	0	0	0	0	0	0	0	0	0	NA	0	NA	0	0	0	0	0	0	0	0	0	0	0	0	0	0
SIXTH	Thermosphaera	2	1	0	0	0	0	0	0	0	0	0	0	0	NA	0	NA	0	0	0	0	0	0	0	0	0	0	0	0	0	0
FIFTH	Pyrodictiaceae	7	6	0	0	0	0	0	0	0	0	0	0	0	NA	0	NA	0	0	0	0	0	0	0	0	0	0	0	0	0	0
SIXTH	Hyperthermus	1	1	0	0	0	0	0	0	0	0	0	0	0	NA	0	NA	0	0	0	0	0	0	0	0	0	0	0	0	0	0
SIXTH	Pyrodictium	4	3	0	0	0	0	0	0	0	0	0	0	0	NA	0	NA	0	0	0	0	0	0	0	0	0	0	0	0	0	0
SIXTH	Pyrofollis	1	1	0	0	0	0	0	0	0	0	0	0	0	NA	0	NA	0	0	0	0	0	0	0	0	0	0	0	0	0	0
SIXTH	Pyrolobus	1	1	0	0	0	0	0	0	0	0	0	0	0	NA	0	NA	0	0	0	0	0	0	0	0	0	0	0	0	0	0
FORTH	Fervidicoccales	3	1	0	0	0	0	0	0	0	0	0	0	0	NA	0	NA	0	0	0	0	0	0	0	0	0	0	0	0	0	0
FIFTH	Fervidicoccaceae	3	1	0	0	0	0	0	0	0	0	0	0	0	NA	0	NA	0	0	0	0	0	0	0	0	0	0	0	0	0	0
SIXTH	Fervidicoccus	3	1	0	0	0	0	0	0	0	0	0	0	0	NA	0	NA	0	0	0	0	0	0	0	0	0	0	0	0	0	0
FORTH	Sulfolobales	223	41	0	0	0	0	0	0	0	0	0	0	0	NA	0	NA	0	0	0	0	0	0	0	0	0	0	0	0	0	0
FIFTH	Sulfolobaceae	223	41	0	0	0	0	0	0	0	0	0	0	0	NA	0	NA	0	0	0	0	0	0	0	0	0	0	0	0	0	0
SIXTH	Acidianus	11	9	0	0	0	0	0	0	0	0	0	0	0	NA	0	NA	0	0	0	0	0	0	0	0	0	0	0	0	0	0
SEVENTH	unclassified_Acidianus	2	2	0	0	0	0	0	0	0	0	0	0	0	NA	0	NA	0	0	0	0	0	0	0	0	0	0	0	0	0	0
SIXTH	Metallosphaera	59	8	0	0	0	0	0	0	0	0	0	0	0	NA	0	NA	0	0	0	0	0	0	0	0	0	0	0	0	0	0
SEVENTH	unclassified_Metallosphaera	40	1	0	0	0	0	0	0	0	0	0	0	0	NA	0	NA	0	0	0	0	0	0	0	0	0	0	0	0	0	0
SIXTH	Saccharolobus	46	4	0	0	0	0	0	0	0	0	0	0	0	NA	0	NA	0	0	0	0	0	0	0	0	0	0	0	0	0	0
SEVENTH	unclassified_Saccharolobus	29	1	0	0	0	0	0	0	0	0	0	0	0	NA	0	NA	0	0	0	0	0	0	0	0	0	0	0	0	0	0
SIXTH	Stygiolobus	6	6	0	0	0	0	0	0	0	0	0	0	0	NA	0	NA	0	0	0	0	0	0	0	0	0	0	0	0	0	0
SEVENTH	unclassified_Stygiolobus	4	4	0	0	0	0	0	0	0	0	0	0	0	NA	0	NA	0	0	0	0	0	0	0	0	0	0	0	0	0	0
SIXTH	Sulfodiicoccus	2	1	0	0	0	0	0	0	0	0	0	0	0	NA	0	NA	0	0	0	0	0	0	0	0	0	0	0	0	0	0
SIXTH	Sulfolobus	86	8	0	0	0	0	0	0	0	0	0	0	0	NA	0	NA	0	0	0	0	0	0	0	0	0	0	0	0	0	0
SEVENTH	unclassified_Sulfolobus	5	5	0	0	0	0	0	0	0	0	0	0	0	NA	0	NA	0	0	0	0	0	0	0	0	0	0	0	0	0	0
SIXTH	Sulfuracidifex	6	2	0	0	0	0	0	0	0	0	0	0	0	NA	0	NA	0	0	0	0	0	0	0	0	0	0	0	0	0	0
SIXTH	Sulfurisphaera	7	3	0	0	0	0	0	0	0	0	0	0	0	NA	0	NA	0	0	0	0	0	0	0	0	0	0	0	0	0	0
FORTH	Thermofilales	22	6	0	0	0	0	0	0	0	0	0	0	0	NA	0	NA	0	0	0	0	0	0	0	0	0	0	0	0	0	0
FIFTH	Thermofilaceae	22	6	0	0	0	0	0	0	0	0	0	0	0	NA	0	NA	0	0	0	0	0	0	0	0	0	0	0	0	0	0
SIXTH	Infirmifilum	2	2	0	0	0	0	0	0	0	0	0	0	0	NA	0	NA	0	0	0	0	0	0	0	0	0	0	0	0	0	0
SEVENTH	unclassified_Infirmifilum	1	1	0	0	0	0	0	0	0	0	0	0	0	NA	0	NA	0	0	0	0	0	0	0	0	0	0	0	0	0	0
SIXTH	Thermofilum	20	4	0	0	0	0	0	0	0	0	0	0	0	NA	0	NA	0	0	0	0	0	0	0	0	0	0	0	0	0	0
SEVENTH	unclassified_Thermofilum	16	1	0	0	0	0	0	0	0	0	0	0	0	NA	0	NA	0	0	0	0	0	0	0	0	0	0	0	0	0	0
FORTH	Thermoproteales	43	24	0	0	0	0	0	0	0	0	0	0	0	NA	0	NA	0	0	0	0	0	0	0	0	0	0	0	0	0	0
FIFTH	Thermoproteaceae	43	24	0	0	0	0	0	0	0	0	0	0	0	NA	0	NA	0	0	0	0	0	0	0	0	0	0	0	0	0	0
SIXTH	Caldivirga	4	4	0	0	0	0	0	0	0	0	0	0	0	NA	0	NA	0	0	0	0	0	0	0	0	0	0	0	0	0	0
SEVENTH	unclassified_Caldivirga	3	3	0	0	0	0	0	0	0	0	0	0	0	NA	0	NA	0	0	0	0	0	0	0	0	0	0	0	0	0	0
SIXTH	Pyrobaculum	23	8	0	0	0	0	0	0	0	0	0	0	0	NA	0	NA	0	0	0	0	0	0	0	0	0	0	0	0	0	0
SEVENTH	unclassified_Pyrobaculum	10	2	0	0	0	0	0	0	0	0	0	0	0	NA	0	NA	0	0	0	0	0	0	0	0	0	0	0	0	0	0
SIXTH	Thermocladium	1	1	0	0	0	0	0	0	0	0	0	0	0	NA	0	NA	0	0	0	0	0	0	0	0	0	0	0	0	0	0
SIXTH	Thermoproteus	3	3	0	0	0	0	0	0	0	0	0	0	0	NA	0	NA	0	0	0	0	0	0	0	0	0	0	0	0	0	0
SEVENTH	unclassified_Thermoproteus	1	1	0	0	0	0	0	0	0	0	0	0	0	NA	0	NA	0	0	0	0	0	0	0	0	0	0	0	0	0	0
SIXTH	Vulcanisaeta	12	8	0	0	0	0	0	0	0	0	0	0	0	NA	0	NA	0	0	0	0	0	0	0	0	0	0	0	0	0	0
SEVENTH	unclassified_Vulcanisaeta	4	4	0	0	0	0	0	0	0	0	0	0	0	NA	0	NA	0	0	0	0	0	0	0	0	0	0	0	0	0	0
FIRST	Bacteria	378459	54387	24183	23297	6.15575	3404	6.25885	23603	22753	6.01201	3332	6.12646	1232	0.0521968	1212	0.0513494	23432	22597	5.97079	3253	5.98121	1174	1151	23091	22261	5.88201	3164	5.81757	1100	1076
SECOND	Abditibacteriota	1	1	0	0	0	0	0	0	0	0	0	0	0	NA	0	NA	0	0	0	0	0	0	0	0	0	0	0	0	0	0
THIRD	Abditibacteriia	1	1	0	0	0	0	0	0	0	0	0	0	0	NA	0	NA	0	0	0	0	0	0	0	0	0	0	0	0	0	0
FORTH	Abditibacteriales	1	1	0	0	0	0	0	0	0	0	0	0	0	NA	0	NA	0	0	0	0	0	0	0	0	0	0	0	0	0	0
FIFTH	Abditibacteriaceae	1	1	0	0	0	0	0	0	0	0	0	0	0	NA	0	NA	0	0	0	0	0	0	0	0	0	0	0	0	0	0
SIXTH	Abditibacterium	1	1	0	0	0	0	0	0	0	0	0	0	0	NA	0	NA	0	0	0	0	0	0	0	0	0	0	0	0	0	0
SECOND	Acidobacteriota	131	100	1	1	0.763359	1	1	1	1	0.763359	1	1	1	1	1	1	1	1	0.763359	1	1	1	1	1	1	0.763359	1	1	1	1
THIRD	Blastocatellia	13	6	0	0	0	0	0	0	0	0	0	0	0	NA	0	NA	0	0	0	0	0	0	0	0	0	0	0	0	0	0
FORTH	Blastocatellales	2	2	0	0	0	0	0	0	0	0	0	0	0	NA	0	NA	0	0	0	0	0	0	0	0	0	0	0	0	0	0
FIFTH	Pyrinomonadaceae	2	2	0	0	0	0	0	0	0	0	0	0	0	NA	0	NA	0	0	0	0	0	0	0	0	0	0	0	0	0	0
SIXTH	Pyrinomonas	2	2	0	0	0	0	0	0	0	0	0	0	0	NA	0	NA	0	0	0	0	0	0	0	0	0	0	0	0	0	0
SEVENTH	unclassified_Pyrinomonas	1	1	0	0	0	0	0	0	0	0	0	0	0	NA	0	NA	0	0	0	0	0	0	0	0	0	0	0	0	0	0
FORTH	Chloracidobacterium	11	4	0	0	0	0	0	0	0	0	0	0	0	NA	0	NA	0	0	0	0	0	0	0	0	0	0	0	0	0	0
FIFTH	unclassified_Chloracidobacterium	1	1	0	0	0	0	0	0	0	0	0	0	0	NA	0	NA	0	0	0	0	0	0	0	0	0	0	0	0	0	0
THIRD	Holophagae	26	24	1	1	3.84615	1	4.16667	1	1	3.84615	1	4.16667	1	1	1	1	1	1	3.84615	1	4.16667	1	1	1	1	3.84615	1	4.16667	1	1
FORTH	Acanthopleuribacterales	2	2	0	0	0	0	0	0	0	0	0	0	0	NA	0	NA	0	0	0	0	0	0	0	0	0	0	0	0	0	0
FIFTH	Acanthopleuribacteraceae	2	2	0	0	0	0	0	0	0	0	0	0	0	NA	0	NA	0	0	0	0	0	0	0	0	0	0	0	0	0	0
SIXTH	Acanthopleuribacter	1	1	0	0	0	0	0	0	0	0	0	0	0	NA	0	NA	0	0	0	0	0	0	0	0	0	0	0	0	0	0
SIXTH	Sulfidibacter	1	1	0	0	0	0	0	0	0	0	0	0	0	NA	0	NA	0	0	0	0	0	0	0	0	0	0	0	0	0	0
FORTH	Holophagales	23	21	1	1	4.34783	1	4.7619	1	1	4.34783	1	4.7619	1	1	1	1	1	1	4.34783	1	4.7619	1	1	1	1	4.34783	1	4.7619	1	1
FIFTH	Holophagaceae	23	21	1	1	4.34783	1	4.7619	1	1	4.34783	1	4.7619	1	1	1	1	1	1	4.34783	1	4.7619	1	1	1	1	4.34783	1	4.7619	1	1
SIXTH	Geothrix	19	17	1	1	5.26316	1	5.88235	1	1	5.26316	1	5.88235	1	1	1	1	1	1	5.26316	1	5.88235	1	1	1	1	5.26316	1	5.88235	1	1
SEVENTH	unclassified_Geothrix	7	5	0	0	0	0	0	0	0	0	0	0	0	NA	0	NA	0	0	0	0	0	0	0	0	0	0	0	0	0	0
SIXTH	Holophaga	2	2	0	0	0	0	0	0	0	0	0	0	0	NA	0	NA	0	0	0	0	0	0	0	0	0	0	0	0	0	0
SEVENTH	environmental_samples	1	1	0	0	0	0	0	0	0	0	0	0	0	NA	0	NA	0	0	0	0	0	0	0	0	0	0	0	0	0	0
SIXTH	Mesoterricola	2	2	0	0	0	0	0	0	0	0	0	0	0	NA	0	NA	0	0	0	0	0	0	0	0	0	0	0	0	0	0
FORTH	Thermotomaculales	1	1	0	0	0	0	0	0	0	0	0	0	0	NA	0	NA	0	0	0	0	0	0	0	0	0	0	0	0	0	0
FIFTH	Thermotomaculaceae	1	1	0	0	0	0	0	0	0	0	0	0	0	NA	0	NA	0	0	0	0	0	0	0	0	0	0	0	0	0	0
SIXTH	Thermotomaculum	1	1	0	0	0	0	0	0	0	0	0	0	0	NA	0	NA	0	0	0	0	0	0	0	0	0	0	0	0	0	0
THIRD	Terriglobia	88	66	0	0	0	0	0	0	0	0	0	0	0	NA	0	NA	0	0	0	0	0	0	0	0	0	0	0	0	0	0
FORTH	Bryobacterales	3	3	0	0	0	0	0	0	0	0	0	0	0	NA	0	NA	0	0	0	0	0	0	0	0	0	0	0	0	0	0
FIFTH	Bryobacteraceae	3	3	0	0	0	0	0	0	0	0	0	0	0	NA	0	NA	0	0	0	0	0	0	0	0	0	0	0	0	0	0
SIXTH	Bryobacter	1	1	0	0	0	0	0	0	0	0	0	0	0	NA	0	NA	0	0	0	0	0	0	0	0	0	0	0	0	0	0
SIXTH	Paludibaculum	2	2	0	0	0	0	0	0	0	0	0	0	0	NA	0	NA	0	0	0	0	0	0	0	0	0	0	0	0	0	0
SEVENTH	environmental_samples	1	1	0	0	0	0	0	0	0	0	0	0	0	NA	0	NA	0	0	0	0	0	0	0	0	0	0	0	0	0	0
FORTH	Terriglobales	85	63	0	0	0	0	0	0	0	0	0	0	0	NA	0	NA	0	0	0	0	0	0	0	0	0	0	0	0	0	0
FIFTH	Acidobacteriaceae	82	60	0	0	0	0	0	0	0	0	0	0	0	NA	0	NA	0	0	0	0	0	0	0	0	0	0	0	0	0	0
SIXTH	Acidicapsa	3	3	0	0	0	0	0	0	0	0	0	0	0	NA	0	NA	0	0	0	0	0	0	0	0	0	0	0	0	0	0
SIXTH	Acidipila	2	2	0	0	0	0	0	0	0	0	0	0	0	NA	0	NA	0	0	0	0	0	0	0	0	0	0	0	0	0	0
SEVENTH	unclassified_Acidipila	1	1	0	0	0	0	0	0	0	0	0	0	0	NA	0	NA	0	0	0	0	0	0	0	0	0	0	0	0	0	0
SIXTH	Acidisarcina	1	1	0	0	0	0	0	0	0	0	0	0	0	NA	0	NA	0	0	0	0	0	0	0	0	0	0	0	0	0	0
SIXTH	Acidobacterium	3	3	0	0	0	0	0	0	0	0	0	0	0	NA	0	NA	0	0	0	0	0	0	0	0	0	0	0	0	0	0
SEVENTH	unclassified_Acidobacterium	2	2	0	0	0	0	0	0	0	0	0	0	0	NA	0	NA	0	0	0	0	0	0	0	0	0	0	0	0	0	0
SIXTH	Alloacidobacterium	2	2	0	0	0	0	0	0	0	0	0	0	0	NA	0	NA	0	0	0	0	0	0	0	0	0	0	0	0	0	0
SEVENTH	unclassified_Alloacidobacterium	1	1	0	0	0	0	0	0	0	0	0	0	0	NA	0	NA	0	0	0	0	0	0	0	0	0	0	0	0	0	0
SIXTH	Bryocella	1	1	0	0	0	0	0	0	0	0	0	0	0	NA	0	NA	0	0	0	0	0	0	0	0	0	0	0	0	0	0
SIXTH	Edaphobacter	25	12	0	0	0	0	0	0	0	0	0	0	0	NA	0	NA	0	0	0	0	0	0	0	0	0	0	0	0	0	0
SEVENTH	unclassified_Edaphobacter	7	4	0	0	0	0	0	0	0	0	0	0	0	NA	0	NA	0	0	0	0	0	0	0	0	0	0	0	0	0	0
SIXTH	Granulicella	20	17	0	0	0	0	0	0	0	0	0	0	0	NA	0	NA	0	0	0	0	0	0	0	0	0	0	0	0	0	0
SEVENTH	unclassified_Granulicella	8	8	0	0	0	0	0	0	0	0	0	0	0	NA	0	NA	0	0	0	0	0	0	0	0	0	0	0	0	0	0
SIXTH	Occallatibacter	2	2	0	0	0	0	0	0	0	0	0	0	0	NA	0	NA	0	0	0	0	0	0	0	0	0	0	0	0	0	0
SIXTH	Paracidobacterium	1	1	0	0	0	0	0	0	0	0	0	0	0	NA	0	NA	0	0	0	0	0	0	0	0	0	0	0	0	0	0
SIXTH	Pseudacidobacterium	1	1	0	0	0	0	0	0	0	0	0	0	0	NA	0	NA	0	0	0	0	0	0	0	0	0	0	0	0	0	0
SIXTH	Silvibacterium	4	2	0	0	0	0	0	0	0	0	0	0	0	NA	0	NA	0	0	0	0	0	0	0	0	0	0	0	0	0	0
SIXTH	Telmatobacter	1	1	0	0	0	0	0	0	0	0	0	0	0	NA	0	NA	0	0	0	0	0	0	0	0	0	0	0	0	0	0
SEVENTH	unclassified_Telmatobacter	1	1	0	0	0	0	0	0	0	0	0	0	0	NA	0	NA	0	0	0	0	0	0	0	0	0	0	0	0	0	0
SIXTH	Terracidiphilus	1	1	0	0	0	0	0	0	0	0	0	0	0	NA	0	NA	0	0	0	0	0	0	0	0	0	0	0	0	0	0
SIXTH	Terriglobus	12	8	0	0	0	0	0	0	0	0	0	0	0	NA	0	NA	0	0	0	0	0	0	0	0	0	0	0	0	0	0
SEVENTH	unclassified_Terriglobus	3	3	0	0	0	0	0	0	0	0	0	0	0	NA	0	NA	0	0	0	0	0	0	0	0	0	0	0	0	0	0
SIXTH	Tunturibacter	3	3	0	0	0	0	0	0	0	0	0	0	0	NA	0	NA	0	0	0	0	0	0	0	0	0	0	0	0	0	0
FIFTH	Candidatus_Korobacteraceae	3	3	0	0	0	0	0	0	0	0	0	0	0	NA	0	NA	0	0	0	0	0	0	0	0	0	0	0	0	0	0
SIXTH	Candidatus_Korobacter	1	1	0	0	0	0	0	0	0	0	0	0	0	NA	0	NA	0	0	0	0	0	0	0	0	0	0	0	0	0	0
SIXTH	Candidatus_Sulfotelmatobacter	2	2	0	0	0	0	0	0	0	0	0	0	0	NA	0	NA	0	0	0	0	0	0	0	0	0	0	0	0	0	0
SEVENTH	unclassified_Candidatus_Sulfotelmatobacter	2	2	0	0	0	0	0	0	0	0	0	0	0	NA	0	NA	0	0	0	0	0	0	0	0	0	0	0	0	0	0
THIRD	Thermoanaerobaculia	1	1	0	0	0	0	0	0	0	0	0	0	0	NA	0	NA	0	0	0	0	0	0	0	0	0	0	0	0	0	0
FORTH	Thermoanaerobaculales	1	1	0	0	0	0	0	0	0	0	0	0	0	NA	0	NA	0	0	0	0	0	0	0	0	0	0	0	0	0	0
FIFTH	Thermoanaerobaculaceae	1	1	0	0	0	0	0	0	0	0	0	0	0	NA	0	NA	0	0	0	0	0	0	0	0	0	0	0	0	0	0
SIXTH	Thermoanaerobaculum	1	1	0	0	0	0	0	0	0	0	0	0	0	NA	0	NA	0	0	0	0	0	0	0	0	0	0	0	0	0	0
THIRD	Vicinamibacteria	3	3	0	0	0	0	0	0	0	0	0	0	0	NA	0	NA	0	0	0	0	0	0	0	0	0	0	0	0	0	0
FORTH	Vicinamibacterales	3	3	0	0	0	0	0	0	0	0	0	0	0	NA	0	NA	0	0	0	0	0	0	0	0	0	0	0	0	0	0
FIFTH	Vicinamibacteraceae	3	3	0	0	0	0	0	0	0	0	0	0	0	NA	0	NA	0	0	0	0	0	0	0	0	0	0	0	0	0	0
SIXTH	Luteitalea	3	3	0	0	0	0	0	0	0	0	0	0	0	NA	0	NA	0	0	0	0	0	0	0	0	0	0	0	0	0	0
SEVENTH	unclassified_Luteitalea	2	2	0	0	0	0	0	0	0	0	0	0	0	NA	0	NA	0	0	0	0	0	0	0	0	0	0	0	0	0	0
SECOND	Actinomycetota	36654	12333	2	2	0.00545643	2	0.0162167	1	1	0.00272822	1	0.00810833	1	1	1	1	0	0	0	0	0	0	0	0	0	0	0	0	0	0
THIRD	Acidimicrobiia	76	26	0	0	0	0	0	0	0	0	0	0	0	NA	0	NA	0	0	0	0	0	0	0	0	0	0	0	0	0	0
FORTH	Acidimicrobiales	76	26	0	0	0	0	0	0	0	0	0	0	0	NA	0	NA	0	0	0	0	0	0	0	0	0	0	0	0	0	0
FIFTH	Acidimicrobiaceae	36	8	0	0	0	0	0	0	0	0	0	0	0	NA	0	NA	0	0	0	0	0	0	0	0	0	0	0	0	0	0
SIXTH	Acidiferrimicrobium	1	1	0	0	0	0	0	0	0	0	0	0	0	NA	0	NA	0	0	0	0	0	0	0	0	0	0	0	0	0	0
SEVENTH	unclassified_Acidiferrimicrobium	1	1	0	0	0	0	0	0	0	0	0	0	0	NA	0	NA	0	0	0	0	0	0	0	0	0	0	0	0	0	0
SIXTH	Acidimicrobium	1	1	0	0	0	0	0	0	0	0	0	0	0	NA	0	NA	0	0	0	0	0	0	0	0	0	0	0	0	0	0
SIXTH	Aciditerrimonas	1	1	0	0	0	0	0	0	0	0	0	0	0	NA	0	NA	0	0	0	0	0	0	0	0	0	0	0	0	0	0
SIXTH	Acidithrix	2	2	0	0	0	0	0	0	0	0	0	0	0	NA	0	NA	0	0	0	0	0	0	0	0	0	0	0	0	0	0
SEVENTH	unclassified_Acidithrix	1	1	0	0	0	0	0	0	0	0	0	0	0	NA	0	NA	0	0	0	0	0	0	0	0	0	0	0	0	0	0
SIXTH	Ferrimicrobium	30	2	0	0	0	0	0	0	0	0	0	0	0	NA	0	NA	0	0	0	0	0	0	0	0	0	0	0	0	0	0
SEVENTH	unclassified_Ferrimicrobium	10	1	0	0	0	0	0	0	0	0	0	0	0	NA	0	NA	0	0	0	0	0	0	0	0	0	0	0	0	0	0
SIXTH	Ferrithrix	1	1	0	0	0	0	0	0	0	0	0	0	0	NA	0	NA	0	0	0	0	0	0	0	0	0	0	0	0	0	0
FIFTH	Candidatus_Poriferisodalaceae	1	1	0	0	0	0	0	0	0	0	0	0	0	NA	0	NA	0	0	0	0	0	0	0	0	0	0	0	0	0	0
SIXTH	Candidatus_Poriferisodalis	1	1	0	0	0	0	0	0	0	0	0	0	0	NA	0	NA	0	0	0	0	0	0	0	0	0	0	0	0	0	0
FIFTH	Iamiaceae	9	9	0	0	0	0	0	0	0	0	0	0	0	NA	0	NA	0	0	0	0	0	0	0	0	0	0	0	0	0	0
SIXTH	Actinomarinicola	1	1	0	0	0	0	0	0	0	0	0	0	0	NA	0	NA	0	0	0	0	0	0	0	0	0	0	0	0	0	0
SIXTH	Aquihabitans	1	1	0	0	0	0	0	0	0	0	0	0	0	NA	0	NA	0	0	0	0	0	0	0	0	0	0	0	0	0	0
SEVENTH	unclassified_Aquihabitans	1	1	0	0	0	0	0	0	0	0	0	0	0	NA	0	NA	0	0	0	0	0	0	0	0	0	0	0	0	0	0
SIXTH	Dermatobacter	1	1	0	0	0	0	0	0	0	0	0	0	0	NA	0	NA	0	0	0	0	0	0	0	0	0	0	0	0	0	0
SIXTH	Iamia	3	3	0	0	0	0	0	0	0	0	0	0	0	NA	0	NA	0	0	0	0	0	0	0	0	0	0	0	0	0	0
SEVENTH	unclassified_Iamia	2	2	0	0	0	0	0	0	0	0	0	0	0	NA	0	NA	0	0	0	0	0	0	0	0	0	0	0	0	0	0
SIXTH	Rhabdothermincola	3	3	0	0	0	0	0	0	0	0	0	0	0	NA	0	NA	0	0	0	0	0	0	0	0	0	0	0	0	0	0
SEVENTH	unclassified_Rhabdothermincola	1	1	0	0	0	0	0	0	0	0	0	0	0	NA	0	NA	0	0	0	0	0	0	0	0	0	0	0	0	0	0
FIFTH	Ilumatobacteraceae	12	5	0	0	0	0	0	0	0	0	0	0	0	NA	0	NA	0	0	0	0	0	0	0	0	0	0	0	0	0	0
SIXTH	Desertimonas	2	1	0	0	0	0	0	0	0	0	0	0	0	NA	0	NA	0	0	0	0	0	0	0	0	0	0	0	0	0	0
SIXTH	Ilumatobacter	10	4	0	0	0	0	0	0	0	0	0	0	0	NA	0	NA	0	0	0	0	0	0	0	0	0	0	0	0	0	0
SEVENTH	unclassified_Ilumatobacter	6	1	0	0	0	0	0	0	0	0	0	0	0	NA	0	NA	0	0	0	0	0	0	0	0	0	0	0	0	0	0
FIFTH	Microthrixaceae	18	3	0	0	0	0	0	0	0	0	0	0	0	NA	0	NA	0	0	0	0	0	0	0	0	0	0	0	0	0	0
SIXTH	Candidatus_Microthrix	18	3	0	0	0	0	0	0	0	0	0	0	0	NA	0	NA	0	0	0	0	0	0	0	0	0	0	0	0	0	0
SEVENTH	environmental_samples	1	1	0	0	0	0	0	0	0	0	0	0	0	NA	0	NA	0	0	0	0	0	0	0	0	0	0	0	0	0	0
SEVENTH	unclassified_Candidatus_Microthrix	15	1	0	0	0	0	0	0	0	0	0	0	0	NA	0	NA	0	0	0	0	0	0	0	0	0	0	0	0	0	0
THIRD	Actinomycetes	35367	11944	2	2	0.00565499	2	0.0167448	1	1	0.00282749	1	0.0083724	1	1	1	1	0	0	0	0	0	0	0	0	0	0	0	0	0	0
FORTH	Acidothermales	1	1	0	0	0	0	0	0	0	0	0	0	0	NA	0	NA	0	0	0	0	0	0	0	0	0	0	0	0	0	0
FIFTH	Acidothermaceae	1	1	0	0	0	0	0	0	0	0	0	0	0	NA	0	NA	0	0	0	0	0	0	0	0	0	0	0	0	0	0
SIXTH	Acidothermus	1	1	0	0	0	0	0	0	0	0	0	0	0	NA	0	NA	0	0	0	0	0	0	0	0	0	0	0	0	0	0
FORTH	Actinomycetales	837	219	0	0	0	0	0	0	0	0	0	0	0	NA	0	NA	0	0	0	0	0	0	0	0	0	0	0	0	0	0
FIFTH	Actinomycetaceae	837	219	0	0	0	0	0	0	0	0	0	0	0	NA	0	NA	0	0	0	0	0	0	0	0	0	0	0	0	0	0
SIXTH	Actinobaculum	15	6	0	0	0	0	0	0	0	0	0	0	0	NA	0	NA	0	0	0	0	0	0	0	0	0	0	0	0	0	0
SEVENTH	environmental_samples	1	1	0	0	0	0	0	0	0	0	0	0	0	NA	0	NA	0	0	0	0	0	0	0	0	0	0	0	0	0	0
SEVENTH	unclassified_Actinobaculum	3	3	0	0	0	0	0	0	0	0	0	0	0	NA	0	NA	0	0	0	0	0	0	0	0	0	0	0	0	0	0
SIXTH	Actinomyces	312	97	0	0	0	0	0	0	0	0	0	0	0	NA	0	NA	0	0	0	0	0	0	0	0	0	0	0	0	0	0
SEVENTH	environmental_samples	42	1	0	0	0	0	0	0	0	0	0	0	0	NA	0	NA	0	0	0	0	0	0	0	0	0	0	0	0	0	0
SEVENTH	unclassified_Actinomyces	74	49	0	0	0	0	0	0	0	0	0	0	0	NA	0	NA	0	0	0	0	0	0	0	0	0	0	0	0	0	0
SIXTH	Actinotignum	65	5	0	0	0	0	0	0	0	0	0	0	0	NA	0	NA	0	0	0	0	0	0	0	0	0	0	0	0	0	0
SEVENTH	unclassified_Actinotignum	1	1	0	0	0	0	0	0	0	0	0	0	0	NA	0	NA	0	0	0	0	0	0	0	0	0	0	0	0	0	0
SIXTH	Ancrocorticia	2	1	0	0	0	0	0	0	0	0	0	0	0	NA	0	NA	0	0	0	0	0	0	0	0	0	0	0	0	0	0
SIXTH	Arcanobacterium	62	14	0	0	0	0	0	0	0	0	0	0	0	NA	0	NA	0	0	0	0	0	0	0	0	0	0	0	0	0	0
SEVENTH	environmental_samples	1	1	0	0	0	0	0	0	0	0	0	0	0	NA	0	NA	0	0	0	0	0	0	0	0	0	0	0	0	0	0
SEVENTH	unclassified_Arcanobacterium	1	1	0	0	0	0	0	0	0	0	0	0	0	NA	0	NA	0	0	0	0	0	0	0	0	0	0	0	0	0	0
SIXTH	Boudabousia	4	3	0	0	0	0	0	0	0	0	0	0	0	NA	0	NA	0	0	0	0	0	0	0	0	0	0	0	0	0	0
SIXTH	Bowdeniella	3	2	0	0	0	0	0	0	0	0	0	0	0	NA	0	NA	0	0	0	0	0	0	0	0	0	0	0	0	0	0
SIXTH	Buchananella	8	5	0	0	0	0	0	0	0	0	0	0	0	NA	0	NA	0	0	0	0	0	0	0	0	0	0	0	0	0	0
SEVENTH	unclassified_Buchananella	4	4	0	0	0	0	0	0	0	0	0	0	0	NA	0	NA	0	0	0	0	0	0	0	0	0	0	0	0	0	0
SIXTH	Changpingibacter	2	1	0	0	0	0	0	0	0	0	0	0	0	NA	0	NA	0	0	0	0	0	0	0	0	0	0	0	0	0	0
SIXTH	Flaviflexus	9	6	0	0	0	0	0	0	0	0	0	0	0	NA	0	NA	0	0	0	0	0	0	0	0	0	0	0	0	0	0
SEVENTH	unclassified_Flaviflexus	1	1	0	0	0	0	0	0	0	0	0	0	0	NA	0	NA	0	0	0	0	0	0	0	0	0	0	0	0	0	0
SIXTH	Gleimia	8	4	0	0	0	0	0	0	0	0	0	0	0	NA	0	NA	0	0	0	0	0	0	0	0	0	0	0	0	0	0
SEVENTH	unclassified_Gleimia	1	1	0	0	0	0	0	0	0	0	0	0	0	NA	0	NA	0	0	0	0	0	0	0	0	0	0	0	0	0	0
SIXTH	Mobiluncus	74	7	0	0	0	0	0	0	0	0	0	0	0	NA	0	NA	0	0	0	0	0	0	0	0	0	0	0	0	0	0
SEVENTH	environmental_samples	10	1	0	0	0	0	0	0	0	0	0	0	0	NA	0	NA	0	0	0	0	0	0	0	0	0	0	0	0	0	0
SEVENTH	unclassified_Mobiluncus	2	1	0	0	0	0	0	0	0	0	0	0	0	NA	0	NA	0	0	0	0	0	0	0	0	0	0	0	0	0	0
SIXTH	Nanchangia	2	1	0	0	0	0	0	0	0	0	0	0	0	NA	0	NA	0	0	0	0	0	0	0	0	0	0	0	0	0	0
SIXTH	Neoactinobaculum	1	1	0	0	0	0	0	0	0	0	0	0	0	NA	0	NA	0	0	0	0	0	0	0	0	0	0	0	0	0	0
SIXTH	Pauljensenia	12	12	0	0	0	0	0	0	0	0	0	0	0	NA	0	NA	0	0	0	0	0	0	0	0	0	0	0	0	0	0
SEVENTH	unclassified_Pauljensenia	11	11	0	0	0	0	0	0	0	0	0	0	0	NA	0	NA	0	0	0	0	0	0	0	0	0	0	0	0	0	0
SIXTH	Peptidiphaga	1	1	0	0	0	0	0	0	0	0	0	0	0	NA	0	NA	0	0	0	0	0	0	0	0	0	0	0	0	0	0
SIXTH	Schaalia	66	21	0	0	0	0	0	0	0	0	0	0	0	NA	0	NA	0	0	0	0	0	0	0	0	0	0	0	0	0	0
SEVENTH	unclassified_Schaalia	10	10	0	0	0	0	0	0	0	0	0	0	0	NA	0	NA	0	0	0	0	0	0	0	0	0	0	0	0	0	0
SIXTH	Scrofimicrobium	2	2	0	0	0	0	0	0	0	0	0	0	0	NA	0	NA	0	0	0	0	0	0	0	0	0	0	0	0	0	0
SEVENTH	unclassified_Scrofimicrobium	1	1	0	0	0	0	0	0	0	0	0	0	0	NA	0	NA	0	0	0	0	0	0	0	0	0	0	0	0	0	0
SIXTH	Trueperella	123	10	0	0	0	0	0	0	0	0	0	0	0	NA	0	NA	0	0	0	0	0	0	0	0	0	0	0	0	0	0
SEVENTH	unclassified_Trueperella	6	4	0	0	0	0	0	0	0	0	0	0	0	NA	0	NA	0	0	0	0	0	0	0	0	0	0	0	0	0	0
SIXTH	Varibaculum	41	7	0	0	0	0	0	0	0	0	0	0	0	NA	0	NA	0	0	0	0	0	0	0	0	0	0	0	0	0	0
SEVENTH	environmental_samples	9	1	0	0	0	0	0	0	0	0	0	0	0	NA	0	NA	0	0	0	0	0	0	0	0	0	0	0	0	0	0
SEVENTH	unclassified_Varibaculum	3	1	0	0	0	0	0	0	0	0	0	0	0	NA	0	NA	0	0	0	0	0	0	0	0	0	0	0	0	0	0
SIXTH	Winkia	25	13	0	0	0	0	0	0	0	0	0	0	0	NA	0	NA	0	0	0	0	0	0	0	0	0	0	0	0	0	0
SEVENTH	unclassified_Winkia	12	12	0	0	0	0	0	0	0	0	0	0	0	NA	0	NA	0	0	0	0	0	0	0	0	0	0	0	0	0	0
FORTH	Actinomycetes_incertae_sedis	2	1	0	0	0	0	0	0	0	0	0	0	0	NA	0	NA	0	0	0	0	0	0	0	0	0	0	0	0	0	0
FIFTH	Halopolyspora	2	1	0	0	0	0	0	0	0	0	0	0	0	NA	0	NA	0	0	0	0	0	0	0	0	0	0	0	0	0	0
FORTH	Actinopolysporales	14	12	0	0	0	0	0	0	0	0	0	0	0	NA	0	NA	0	0	0	0	0	0	0	0	0	0	0	0	0	0
FIFTH	Actinopolysporaceae	14	12	0	0	0	0	0	0	0	0	0	0	0	NA	0	NA	0	0	0	0	0	0	0	0	0	0	0	0	0	0
SIXTH	Actinopolyspora	13	11	0	0	0	0	0	0	0	0	0	0	0	NA	0	NA	0	0	0	0	0	0	0	0	0	0	0	0	0	0
SEVENTH	unclassified_Actinopolyspora	2	2	0	0	0	0	0	0	0	0	0	0	0	NA	0	NA	0	0	0	0	0	0	0	0	0	0	0	0	0	0
SIXTH	Haloactinomyces	1	1	0	0	0	0	0	0	0	0	0	0	0	NA	0	NA	0	0	0	0	0	0	0	0	0	0	0	0	0	0
FORTH	Bifidobacteriales	3062	216	0	0	0	0	0	0	0	0	0	0	0	NA	0	NA	0	0	0	0	0	0	0	0	0	0	0	0	0	0
FIFTH	Bifidobacteriaceae	3062	216	0	0	0	0	0	0	0	0	0	0	0	NA	0	NA	0	0	0	0	0	0	0	0	0	0	0	0	0	0
SIXTH	Aeriscardovia	2	1	0	0	0	0	0	0	0	0	0	0	0	NA	0	NA	0	0	0	0	0	0	0	0	0	0	0	0	0	0
SIXTH	Alloscardovia	30	5	0	0	0	0	0	0	0	0	0	0	0	NA	0	NA	0	0	0	0	0	0	0	0	0	0	0	0	0	0
SEVENTH	unclassified_Alloscardovia	1	1	0	0	0	0	0	0	0	0	0	0	0	NA	0	NA	0	0	0	0	0	0	0	0	0	0	0	0	0	0
SIXTH	Bifidobacterium	2884	190	0	0	0	0	0	0	0	0	0	0	0	NA	0	NA	0	0	0	0	0	0	0	0	0	0	0	0	0	0
SEVENTH	environmental_samples	47	1	0	0	0	0	0	0	0	0	0	0	0	NA	0	NA	0	0	0	0	0	0	0	0	0	0	0	0	0	0
SEVENTH	unclassified_Bifidobacterium	117	84	0	0	0	0	0	0	0	0	0	0	0	NA	0	NA	0	0	0	0	0	0	0	0	0	0	0	0	0	0
SIXTH	Bombiscardovia	2	2	0	0	0	0	0	0	0	0	0	0	0	NA	0	NA	0	0	0	0	0	0	0	0	0	0	0	0	0	0
SIXTH	Galliscardovia	1	1	0	0	0	0	0	0	0	0	0	0	0	NA	0	NA	0	0	0	0	0	0	0	0	0	0	0	0	0	0
SIXTH	Gardnerella	130	12	0	0	0	0	0	0	0	0	0	0	0	NA	0	NA	0	0	0	0	0	0	0	0	0	0	0	0	0	0
SEVENTH	environmental_samples	4	1	0	0	0	0	0	0	0	0	0	0	0	NA	0	NA	0	0	0	0	0	0	0	0	0	0	0	0	0	0
SEVENTH	unclassified_Gardnerella	5	5	0	0	0	0	0	0	0	0	0	0	0	NA	0	NA	0	0	0	0	0	0	0	0	0	0	0	0	0	0
SIXTH	Parascardovia	5	1	0	0	0	0	0	0	0	0	0	0	0	NA	0	NA	0	0	0	0	0	0	0	0	0	0	0	0	0	0
SIXTH	Pseudoscardovia	3	2	0	0	0	0	0	0	0	0	0	0	0	NA	0	NA	0	0	0	0	0	0	0	0	0	0	0	0	0	0
SIXTH	Scardovia	5	2	0	0	0	0	0	0	0	0	0	0	0	NA	0	NA	0	0	0	0	0	0	0	0	0	0	0	0	0	0
FORTH	Candidatus_Nanopelagicales	16	9	0	0	0	0	0	0	0	0	0	0	0	NA	0	NA	0	0	0	0	0	0	0	0	0	0	0	0	0	0
FIFTH	Candidatus_Nanopelagicaceae	16	9	0	0	0	0	0	0	0	0	0	0	0	NA	0	NA	0	0	0	0	0	0	0	0	0	0	0	0	0	0
SIXTH	Candidatus_Nanopelagicus	3	3	0	0	0	0	0	0	0	0	0	0	0	NA	0	NA	0	0	0	0	0	0	0	0	0	0	0	0	0	0
SIXTH	Candidatus_Planktophila	13	6	0	0	0	0	0	0	0	0	0	0	0	NA	0	NA	0	0	0	0	0	0	0	0	0	0	0	0	0	0
FORTH	Catenulisporales	25	18	0	0	0	0	0	0	0	0	0	0	0	NA	0	NA	0	0	0	0	0	0	0	0	0	0	0	0	0	0
FIFTH	Actinospicaceae	12	7	0	0	0	0	0	0	0	0	0	0	0	NA	0	NA	0	0	0	0	0	0	0	0	0	0	0	0	0	0
SIXTH	Actinocrinis	6	2	0	0	0	0	0	0	0	0	0	0	0	NA	0	NA	0	0	0	0	0	0	0	0	0	0	0	0	0	0
SEVENTH	unclassified_Actinocrinis	5	1	0	0	0	0	0	0	0	0	0	0	0	NA	0	NA	0	0	0	0	0	0	0	0	0	0	0	0	0	0
SIXTH	Actinospica	6	5	0	0	0	0	0	0	0	0	0	0	0	NA	0	NA	0	0	0	0	0	0	0	0	0	0	0	0	0	0
SEVENTH	unclassified_Actinospica	1	1	0	0	0	0	0	0	0	0	0	0	0	NA	0	NA	0	0	0	0	0	0	0	0	0	0	0	0	0	0
FIFTH	Catenulisporaceae	13	11	0	0	0	0	0	0	0	0	0	0	0	NA	0	NA	0	0	0	0	0	0	0	0	0	0	0	0	0	0
SIXTH	Catenulispora	13	11	0	0	0	0	0	0	0	0	0	0	0	NA	0	NA	0	0	0	0	0	0	0	0	0	0	0	0	0	0
SEVENTH	unclassified_Catenulispora	5	5	0	0	0	0	0	0	0	0	0	0	0	NA	0	NA	0	0	0	0	0	0	0	0	0	0	0	0	0	0
FORTH	Cryptosporangiales	5	5	0	0	0	0	0	0	0	0	0	0	0	NA	0	NA	0	0	0	0	0	0	0	0	0	0	0	0	0	0
FIFTH	Cryptosporangiaceae	5	5	0	0	0	0	0	0	0	0	0	0	0	NA	0	NA	0	0	0	0	0	0	0	0	0	0	0	0	0	0
SIXTH	Cryptosporangium	5	5	0	0	0	0	0	0	0	0	0	0	0	NA	0	NA	0	0	0	0	0	0	0	0	0	0	0	0	0	0
FORTH	Frankiales	90	74	0	0	0	0	0	0	0	0	0	0	0	NA	0	NA	0	0	0	0	0	0	0	0	0	0	0	0	0	0
FIFTH	Frankiaceae	90	74	0	0	0	0	0	0	0	0	0	0	0	NA	0	NA	0	0	0	0	0	0	0	0	0	0	0	0	0	0
SIXTH	Frankia	63	49	0	0	0	0	0	0	0	0	0	0	0	NA	0	NA	0	0	0	0	0	0	0	0	0	0	0	0	0	0
SEVENTH	unclassified_Frankia	42	39	0	0	0	0	0	0	0	0	0	0	0	NA	0	NA	0	0	0	0	0	0	0	0	0	0	0	0	0	0
SIXTH	Parafrankia	12	12	0	0	0	0	0	0	0	0	0	0	0	NA	0	NA	0	0	0	0	0	0	0	0	0	0	0	0	0	0
SEVENTH	unclassified_Parafrankia	7	7	0	0	0	0	0	0	0	0	0	0	0	NA	0	NA	0	0	0	0	0	0	0	0	0	0	0	0	0	0
SIXTH	Protofrankia	8	6	0	0	0	0	0	0	0	0	0	0	0	NA	0	NA	0	0	0	0	0	0	0	0	0	0	0	0	0	0
SEVENTH	unclassified_Protofrankia	3	3	0	0	0	0	0	0	0	0	0	0	0	NA	0	NA	0	0	0	0	0	0	0	0	0	0	0	0	0	0
SIXTH	Pseudofrankia	7	7	0	0	0	0	0	0	0	0	0	0	0	NA	0	NA	0	0	0	0	0	0	0	0	0	0	0	0	0	0
SEVENTH	unclassified_Pseudofrankia	4	4	0	0	0	0	0	0	0	0	0	0	0	NA	0	NA	0	0	0	0	0	0	0	0	0	0	0	0	0	0
FORTH	Geodermatophilales	131	105	0	0	0	0	0	0	0	0	0	0	0	NA	0	NA	0	0	0	0	0	0	0	0	0	0	0	0	0	0
FIFTH	Antricoccaceae	1	1	0	0	0	0	0	0	0	0	0	0	0	NA	0	NA	0	0	0	0	0	0	0	0	0	0	0	0	0	0
SIXTH	Antricoccus	1	1	0	0	0	0	0	0	0	0	0	0	0	NA	0	NA	0	0	0	0	0	0	0	0	0	0	0	0	0	0
FIFTH	Geodermatophilaceae	130	104	0	0	0	0	0	0	0	0	0	0	0	NA	0	NA	0	0	0	0	0	0	0	0	0	0	0	0	0	0
SIXTH	Blastococcus	44	40	0	0	0	0	0	0	0	0	0	0	0	NA	0	NA	0	0	0	0	0	0	0	0	0	0	0	0	0	0
SEVENTH	unclassified_Blastococcus	25	25	0	0	0	0	0	0	0	0	0	0	0	NA	0	NA	0	0	0	0	0	0	0	0	0	0	0	0	0	0
SIXTH	Cumulibacter	2	2	0	0	0	0	0	0	0	0	0	0	0	NA	0	NA	0	0	0	0	0	0	0	0	0	0	0	0	0	0
SIXTH	Geodermatophilus	33	26	0	0	0	0	0	0	0	0	0	0	0	NA	0	NA	0	0	0	0	0	0	0	0	0	0	0	0	0	0
SEVENTH	unclassified_Geodermatophilus	9	9	0	0	0	0	0	0	0	0	0	0	0	NA	0	NA	0	0	0	0	0	0	0	0	0	0	0	0	0	0
SIXTH	Goekera	4	1	0	0	0	0	0	0	0	0	0	0	0	NA	0	NA	0	0	0	0	0	0	0	0	0	0	0	0	0	0
SIXTH	Klenkia	9	7	0	0	0	0	0	0	0	0	0	0	0	NA	0	NA	0	0	0	0	0	0	0	0	0	0	0	0	0	0
SEVENTH	unclassified_Klenkia	1	1	0	0	0	0	0	0	0	0	0	0	0	NA	0	NA	0	0	0	0	0	0	0	0	0	0	0	0	0	0
SIXTH	Modestobacter	36	26	0	0	0	0	0	0	0	0	0	0	0	NA	0	NA	0	0	0	0	0	0	0	0	0	0	0	0	0	0
SEVENTH	environmental_samples	1	1	0	0	0	0	0	0	0	0	0	0	0	NA	0	NA	0	0	0	0	0	0	0	0	0	0	0	0	0	0
SEVENTH	unclassified_Modestobacter	17	17	0	0	0	0	0	0	0	0	0	0	0	NA	0	NA	0	0	0	0	0	0	0	0	0	0	0	0	0	0
SIXTH	Petropleomorpha	1	1	0	0	0	0	0	0	0	0	0	0	0	NA	0	NA	0	0	0	0	0	0	0	0	0	0	0	0	0	0
SIXTH	Trujillonella	1	1	0	0	0	0	0	0	0	0	0	0	0	NA	0	NA	0	0	0	0	0	0	0	0	0	0	0	0	0	0
FORTH	Glycomycetales	43	35	0	0	0	0	0	0	0	0	0	0	0	NA	0	NA	0	0	0	0	0	0	0	0	0	0	0	0	0	0
FIFTH	Glycomycetaceae	43	35	0	0	0	0	0	0	0	0	0	0	0	NA	0	NA	0	0	0	0	0	0	0	0	0	0	0	0	0	0
SIXTH	Glycomyces	36	29	0	0	0	0	0	0	0	0	0	0	0	NA	0	NA	0	0	0	0	0	0	0	0	0	0	0	0	0	0
SEVENTH	unclassified_Glycomyces	9	9	0	0	0	0	0	0	0	0	0	0	0	NA	0	NA	0	0	0	0	0	0	0	0	0	0	0	0	0	0
SIXTH	Haloglycomyces	1	1	0	0	0	0	0	0	0	0	0	0	0	NA	0	NA	0	0	0	0	0	0	0	0	0	0	0	0	0	0
SIXTH	Natronoglycomyces	1	1	0	0	0	0	0	0	0	0	0	0	0	NA	0	NA	0	0	0	0	0	0	0	0	0	0	0	0	0	0
SIXTH	Stackebrandtia	5	4	0	0	0	0	0	0	0	0	0	0	0	NA	0	NA	0	0	0	0	0	0	0	0	0	0	0	0	0	0
SEVENTH	unclassified_Stackebrandtia	1	1	0	0	0	0	0	0	0	0	0	0	0	NA	0	NA	0	0	0	0	0	0	0	0	0	0	0	0	0	0
FORTH	Jatrophihabitantales	12	7	0	0	0	0	0	0	0	0	0	0	0	NA	0	NA	0	0	0	0	0	0	0	0	0	0	0	0	0	0
FIFTH	Jatrophihabitantaceae	12	7	0	0	0	0	0	0	0	0	0	0	0	NA	0	NA	0	0	0	0	0	0	0	0	0	0	0	0	0	0
SIXTH	Jatrophihabitans	12	7	0	0	0	0	0	0	0	0	0	0	0	NA	0	NA	0	0	0	0	0	0	0	0	0	0	0	0	0	0
SEVENTH	environmental_samples	4	1	0	0	0	0	0	0	0	0	0	0	0	NA	0	NA	0	0	0	0	0	0	0	0	0	0	0	0	0	0
SEVENTH	unclassified_Jatrophihabitans	4	3	0	0	0	0	0	0	0	0	0	0	0	NA	0	NA	0	0	0	0	0	0	0	0	0	0	0	0	0	0
FORTH	Jiangellales	23	20	0	0	0	0	0	0	0	0	0	0	0	NA	0	NA	0	0	0	0	0	0	0	0	0	0	0	0	0	0
FIFTH	Jiangellaceae	23	20	0	0	0	0	0	0	0	0	0	0	0	NA	0	NA	0	0	0	0	0	0	0	0	0	0	0	0	0	0
SIXTH	Haloactinopolyspora	3	2	0	0	0	0	0	0	0	0	0	0	0	NA	0	NA	0	0	0	0	0	0	0	0	0	0	0	0	0	0
SEVENTH	unclassified_Haloactinopolyspora	1	1	0	0	0	0	0	0	0	0	0	0	0	NA	0	NA	0	0	0	0	0	0	0	0	0	0	0	0	0	0
SIXTH	Jiangella	14	12	0	0	0	0	0	0	0	0	0	0	0	NA	0	NA	0	0	0	0	0	0	0	0	0	0	0	0	0	0
SEVENTH	unclassified_Jiangella	1	1	0	0	0	0	0	0	0	0	0	0	0	NA	0	NA	0	0	0	0	0	0	0	0	0	0	0	0	0	0
SIXTH	Phytoactinopolyspora	6	6	0	0	0	0	0	0	0	0	0	0	0	NA	0	NA	0	0	0	0	0	0	0	0	0	0	0	0	0	0
FORTH	Kineosporiales	48	39	0	0	0	0	0	0	0	0	0	0	0	NA	0	NA	0	0	0	0	0	0	0	0	0	0	0	0	0	0
FIFTH	Kineosporiaceae	48	39	0	0	0	0	0	0	0	0	0	0	0	NA	0	NA	0	0	0	0	0	0	0	0	0	0	0	0	0	0
SIXTH	Angustibacter	2	2	0	0	0	0	0	0	0	0	0	0	0	NA	0	NA	0	0	0	0	0	0	0	0	0	0	0	0	0	0
SEVENTH	unclassified_Angustibacter	1	1	0	0	0	0	0	0	0	0	0	0	0	NA	0	NA	0	0	0	0	0	0	0	0	0	0	0	0	0	0
SIXTH	Kineococcus	20	17	0	0	0	0	0	0	0	0	0	0	0	NA	0	NA	0	0	0	0	0	0	0	0	0	0	0	0	0	0
SEVENTH	unclassified_Kineococcus	5	5	0	0	0	0	0	0	0	0	0	0	0	NA	0	NA	0	0	0	0	0	0	0	0	0	0	0	0	0	0
SIXTH	Kineosporia	10	9	0	0	0	0	0	0	0	0	0	0	0	NA	0	NA	0	0	0	0	0	0	0	0	0	0	0	0	0	0
SEVENTH	unclassified_Kineosporia	4	4	0	0	0	0	0	0	0	0	0	0	0	NA	0	NA	0	0	0	0	0	0	0	0	0	0	0	0	0	0
SIXTH	Pseudokineococcus	10	6	0	0	0	0	0	0	0	0	0	0	0	NA	0	NA	0	0	0	0	0	0	0	0	0	0	0	0	0	0
SEVENTH	environmental_samples	3	1	0	0	0	0	0	0	0	0	0	0	0	NA	0	NA	0	0	0	0	0	0	0	0	0	0	0	0	0	0
SEVENTH	unclassified_Pseudokineococcus	2	2	0	0	0	0	0	0	0	0	0	0	0	NA	0	NA	0	0	0	0	0	0	0	0	0	0	0	0	0	0
SIXTH	Quadrisphaera	6	5	0	0	0	0	0	0	0	0	0	0	0	NA	0	NA	0	0	0	0	0	0	0	0	0	0	0	0	0	0
SEVENTH	unclassified_Quadrisphaera	3	3	0	0	0	0	0	0	0	0	0	0	0	NA	0	NA	0	0	0	0	0	0	0	0	0	0	0	0	0	0
FORTH	Kitasatosporales	6343	4029	0	0	0	0	0	0	0	0	0	0	0	NA	0	NA	0	0	0	0	0	0	0	0	0	0	0	0	0	0
FIFTH	Carbonactinosporaceae	4	1	0	0	0	0	0	0	0	0	0	0	0	NA	0	NA	0	0	0	0	0	0	0	0	0	0	0	0	0	0
SIXTH	Carbonactinospora	4	1	0	0	0	0	0	0	0	0	0	0	0	NA	0	NA	0	0	0	0	0	0	0	0	0	0	0	0	0	0
FIFTH	Streptomycetaceae	6339	4028	0	0	0	0	0	0	0	0	0	0	0	NA	0	NA	0	0	0	0	0	0	0	0	0	0	0	0	0	0
SIXTH	Actinacidiphila	26	14	0	0	0	0	0	0	0	0	0	0	0	NA	0	NA	0	0	0	0	0	0	0	0	0	0	0	0	0	0
SEVENTH	unclassified_Actinacidiphila	1	1	0	0	0	0	0	0	0	0	0	0	0	NA	0	NA	0	0	0	0	0	0	0	0	0	0	0	0	0	0
SIXTH	Allostreptomyces	1	1	0	0	0	0	0	0	0	0	0	0	0	NA	0	NA	0	0	0	0	0	0	0	0	0	0	0	0	0	0
SIXTH	Embleya	5	4	0	0	0	0	0	0	0	0	0	0	0	NA	0	NA	0	0	0	0	0	0	0	0	0	0	0	0	0	0
SEVENTH	unclassified_Embleya	2	2	0	0	0	0	0	0	0	0	0	0	0	NA	0	NA	0	0	0	0	0	0	0	0	0	0	0	0	0	0
SIXTH	Kitasatospora	180	127	0	0	0	0	0	0	0	0	0	0	0	NA	0	NA	0	0	0	0	0	0	0	0	0	0	0	0	0	0
SEVENTH	unclassified_Kitasatospora	94	94	0	0	0	0	0	0	0	0	0	0	0	NA	0	NA	0	0	0	0	0	0	0	0	0	0	0	0	0	0
SIXTH	Mangrovactinospora	1	1	0	0	0	0	0	0	0	0	0	0	0	NA	0	NA	0	0	0	0	0	0	0	0	0	0	0	0	0	0
SIXTH	Peterkaempfera	2	2	0	0	0	0	0	0	0	0	0	0	0	NA	0	NA	0	0	0	0	0	0	0	0	0	0	0	0	0	0
SIXTH	Phaeacidiphilus	1	1	0	0	0	0	0	0	0	0	0	0	0	NA	0	NA	0	0	0	0	0	0	0	0	0	0	0	0	0	0
SIXTH	Streptacidiphilus	23	21	0	0	0	0	0	0	0	0	0	0	0	NA	0	NA	0	0	0	0	0	0	0	0	0	0	0	0	0	0
SEVENTH	unclassified_Streptacidiphilus	11	11	0	0	0	0	0	0	0	0	0	0	0	NA	0	NA	0	0	0	0	0	0	0	0	0	0	0	0	0	0
SIXTH	Streptantibioticus	9	5	0	0	0	0	0	0	0	0	0	0	0	NA	0	NA	0	0	0	0	0	0	0	0	0	0	0	0	0	0
SIXTH	Streptodolium	1	1	0	0	0	0	0	0	0	0	0	0	0	NA	0	NA	0	0	0	0	0	0	0	0	0	0	0	0	0	0
SIXTH	Streptomyces	6083	3845	0	0	0	0	0	0	0	0	0	0	0	NA	0	NA	0	0	0	0	0	0	0	0	0	0	0	0	0	0
SEVENTH	environmental_samples	2	1	0	0	0	0	0	0	0	0	0	0	0	NA	0	NA	0	0	0	0	0	0	0	0	0	0	0	0	0	0
SEVENTH	unclassified_	0	0	0	0	0	0	0	0	0	NA	0	NA	0	0	0	0	0	0	0	0	0	0
SEVENTH	unclassified_Streptomyces	3146	3110	0	0	0	0	0	0	0	0	0	0	0	NA	0	NA	0	0	0	0	0	0	0	0	0	0	0	0	0	0
SIXTH	Wenjunlia	3	2	0	0	0	0	0	0	0	0	0	0	0	NA	0	NA	0	0	0	0	0	0	0	0	0	0	0	0	0	0
SIXTH	Yinghuangia	4	4	0	0	0	0	0	0	0	0	0	0	0	NA	0	NA	0	0	0	0	0	0	0	0	0	0	0	0	0	0
SEVENTH	unclassified_Yinghuangia	1	1	0	0	0	0	0	0	0	0	0	0	0	NA	0	NA	0	0	0	0	0	0	0	0	0	0	0	0	0	0
FORTH	Micrococcales	5455	3024	0	0	0	0	0	0	0	0	0	0	0	NA	0	NA	0	0	0	0	0	0	0	0	0	0	0	0	0	0
FIFTH	Beutenbergiaceae	10	7	0	0	0	0	0	0	0	0	0	0	0	NA	0	NA	0	0	0	0	0	0	0	0	0	0	0	0	0	0
SIXTH	Beutenbergia	1	1	0	0	0	0	0	0	0	0	0	0	0	NA	0	NA	0	0	0	0	0	0	0	0	0	0	0	0	0	0
SIXTH	Litorihabitans	1	1	0	0	0	0	0	0	0	0	0	0	0	NA	0	NA	0	0	0	0	0	0	0	0	0	0	0	0	0	0
SIXTH	Miniimonas	3	2	0	0	0	0	0	0	0	0	0	0	0	NA	0	NA	0	0	0	0	0	0	0	0	0	0	0	0	0	0
SEVENTH	unclassified_Miniimonas	1	1	0	0	0	0	0	0	0	0	0	0	0	NA	0	NA	0	0	0	0	0	0	0	0	0	0	0	0	0	0
SIXTH	Salana	2	1	0	0	0	0	0	0	0	0	0	0	0	NA	0	NA	0	0	0	0	0	0	0	0	0	0	0	0	0	0
SIXTH	Serinibacter	3	2	0	0	0	0	0	0	0	0	0	0	0	NA	0	NA	0	0	0	0	0	0	0	0	0	0	0	0	0	0
FIFTH	Bogoriellaceae	32	24	0	0	0	0	0	0	0	0	0	0	0	NA	0	NA	0	0	0	0	0	0	0	0	0	0	0	0	0	0
SIXTH	Bogoriella	1	1	0	0	0	0	0	0	0	0	0	0	0	NA	0	NA	0	0	0	0	0	0	0	0	0	0	0	0	0	0
SIXTH	Georgenia	31	23	0	0	0	0	0	0	0	0	0	0	0	NA	0	NA	0	0	0	0	0	0	0	0	0	0	0	0	0	0
SEVENTH	environmental_samples	1	1	0	0	0	0	0	0	0	0	0	0	0	NA	0	NA	0	0	0	0	0	0	0	0	0	0	0	0	0	0
SEVENTH	unclassified_Georgenia	10	10	0	0	0	0	0	0	0	0	0	0	0	NA	0	NA	0	0	0	0	0	0	0	0	0	0	0	0	0	0
FIFTH	Brevibacteriaceae	200	85	0	0	0	0	0	0	0	0	0	0	0	NA	0	NA	0	0	0	0	0	0	0	0	0	0	0	0	0	0
SIXTH	Brevibacterium	194	82	0	0	0	0	0	0	0	0	0	0	0	NA	0	NA	0	0	0	0	0	0	0	0	0	0	0	0	0	0
SEVENTH	environmental_samples	3	1	0	0	0	0	0	0	0	0	0	0	0	NA	0	NA	0	0	0	0	0	0	0	0	0	0	0	0	0	0
SEVENTH	unclassified_Brevibacterium	47	43	0	0	0	0	0	0	0	0	0	0	0	NA	0	NA	0	0	0	0	0	0	0	0	0	0	0	0	0	0
SIXTH	Saxibacter	1	1	0	0	0	0	0	0	0	0	0	0	0	NA	0	NA	0	0	0	0	0	0	0	0	0	0	0	0	0	0
SIXTH	Sediminivirga	3	1	0	0	0	0	0	0	0	0	0	0	0	NA	0	NA	0	0	0	0	0	0	0	0	0	0	0	0	0	0
SIXTH	Spelaeicoccus	2	1	0	0	0	0	0	0	0	0	0	0	0	NA	0	NA	0	0	0	0	0	0	0	0	0	0	0	0	0	0
FIFTH	Cellulomonadaceae	194	126	0	0	0	0	0	0	0	0	0	0	0	NA	0	NA	0	0	0	0	0	0	0	0	0	0	0	0	0	0
SIXTH	Actinotalea	19	15	0	0	0	0	0	0	0	0	0	0	0	NA	0	NA	0	0	0	0	0	0	0	0	0	0	0	0	0	0
SEVENTH	environmental_samples	1	1	0	0	0	0	0	0	0	0	0	0	0	NA	0	NA	0	0	0	0	0	0	0	0	0	0	0	0	0	0
SEVENTH	unclassified_Actinotalea	8	7	0	0	0	0	0	0	0	0	0	0	0	NA	0	NA	0	0	0	0	0	0	0	0	0	0	0	0	0	0
SIXTH	Cellulomonas	146	91	0	0	0	0	0	0	0	0	0	0	0	NA	0	NA	0	0	0	0	0	0	0	0	0	0	0	0	0	0
SEVENTH	environmental_samples	3	1	0	0	0	0	0	0	0	0	0	0	0	NA	0	NA	0	0	0	0	0	0	0	0	0	0	0	0	0	0
SEVENTH	unclassified_Cellulomonas	50	43	0	0	0	0	0	0	0	0	0	0	0	NA	0	NA	0	0	0	0	0	0	0	0	0	0	0	0	0	0
SIXTH	Oerskovia	20	13	0	0	0	0	0	0	0	0	0	0	0	NA	0	NA	0	0	0	0	0	0	0	0	0	0	0	0	0	0
SEVENTH	unclassified_Oerskovia	4	4	0	0	0	0	0	0	0	0	0	0	0	NA	0	NA	0	0	0	0	0	0	0	0	0	0	0	0	0	0
SIXTH	Paraoerskovia	3	2	0	0	0	0	0	0	0	0	0	0	0	NA	0	NA	0	0	0	0	0	0	0	0	0	0	0	0	0	0
SIXTH	Pseudactinotalea	4	4	0	0	0	0	0	0	0	0	0	0	0	NA	0	NA	0	0	0	0	0	0	0	0	0	0	0	0	0	0
SEVENTH	unclassified_Pseudactinotalea	2	2	0	0	0	0	0	0	0	0	0	0	0	NA	0	NA	0	0	0	0	0	0	0	0	0	0	0	0	0	0
SIXTH	Sediminihabitans	2	1	0	0	0	0	0	0	0	0	0	0	0	NA	0	NA	0	0	0	0	0	0	0	0	0	0	0	0	0	0
FIFTH	Demequinaceae	51	38	0	0	0	0	0	0	0	0	0	0	0	NA	0	NA	0	0	0	0	0	0	0	0	0	0	0	0	0	0
SIXTH	Demequina	51	38	0	0	0	0	0	0	0	0	0	0	0	NA	0	NA	0	0	0	0	0	0	0	0	0	0	0	0	0	0
SEVENTH	environmental_samples	1	1	0	0	0	0	0	0	0	0	0	0	0	NA	0	NA	0	0	0	0	0	0	0	0	0	0	0	0	0	0
SEVENTH	unclassified_Demequina	13	11	0	0	0	0	0	0	0	0	0	0	0	NA	0	NA	0	0	0	0	0	0	0	0	0	0	0	0	0	0
FIFTH	Dermabacteraceae	125	63	0	0	0	0	0	0	0	0	0	0	0	NA	0	NA	0	0	0	0	0	0	0	0	0	0	0	0	0	0
SIXTH	Brachybacterium	85	50	0	0	0	0	0	0	0	0	0	0	0	NA	0	NA	0	0	0	0	0	0	0	0	0	0	0	0	0	0
SEVENTH	environmental_samples	1	1	0	0	0	0	0	0	0	0	0	0	0	NA	0	NA	0	0	0	0	0	0	0	0	0	0	0	0	0	0
SEVENTH	unclassified_Brachybacterium	24	22	0	0	0	0	0	0	0	0	0	0	0	NA	0	NA	0	0	0	0	0	0	0	0	0	0	0	0	0	0
SIXTH	Dermabacter	32	10	0	0	0	0	0	0	0	0	0	0	0	NA	0	NA	0	0	0	0	0	0	0	0	0	0	0	0	0	0
SEVENTH	unclassified_Dermabacter	8	7	0	0	0	0	0	0	0	0	0	0	0	NA	0	NA	0	0	0	0	0	0	0	0	0	0	0	0	0	0
SIXTH	Devriesea	1	1	0	0	0	0	0	0	0	0	0	0	0	NA	0	NA	0	0	0	0	0	0	0	0	0	0	0	0	0	0
SIXTH	Helcobacillus	7	2	0	0	0	0	0	0	0	0	0	0	0	NA	0	NA	0	0	0	0	0	0	0	0	0	0	0	0	0	0
SEVENTH	unclassified_Helcobacillus	1	1	0	0	0	0	0	0	0	0	0	0	0	NA	0	NA	0	0	0	0	0	0	0	0	0	0	0	0	0	0
FIFTH	Dermacoccaceae	66	41	0	0	0	0	0	0	0	0	0	0	0	NA	0	NA	0	0	0	0	0	0	0	0	0	0	0	0	0	0
SIXTH	Allobranchiibius	4	4	0	0	0	0	0	0	0	0	0	0	0	NA	0	NA	0	0	0	0	0	0	0	0	0	0	0	0	0	0
SEVENTH	unclassified_Allobranchiibius	3	3	0	0	0	0	0	0	0	0	0	0	0	NA	0	NA	0	0	0	0	0	0	0	0	0	0	0	0	0	0
SIXTH	Barrientosiimonas	3	2	0	0	0	0	0	0	0	0	0	0	0	NA	0	NA	0	0	0	0	0	0	0	0	0	0	0	0	0	0
SIXTH	Branchiibius	3	2	0	0	0	0	0	0	0	0	0	0	0	NA	0	NA	0	0	0	0	0	0	0	0	0	0	0	0	0	0
SEVENTH	unclassified_Branchiibius	1	1	0	0	0	0	0	0	0	0	0	0	0	NA	0	NA	0	0	0	0	0	0	0	0	0	0	0	0	0	0
SIXTH	Calidifontibacter	1	1	0	0	0	0	0	0	0	0	0	0	0	NA	0	NA	0	0	0	0	0	0	0	0	0	0	0	0	0	0
SIXTH	Demetria	1	1	0	0	0	0	0	0	0	0	0	0	0	NA	0	NA	0	0	0	0	0	0	0	0	0	0	0	0	0	0
SIXTH	Dermacoccus	34	14	0	0	0	0	0	0	0	0	0	0	0	NA	0	NA	0	0	0	0	0	0	0	0	0	0	0	0	0	0
SEVENTH	environmental_samples	1	1	0	0	0	0	0	0	0	0	0	0	0	NA	0	NA	0	0	0	0	0	0	0	0	0	0	0	0	0	0
SEVENTH	unclassified_Dermacoccus	9	9	0	0	0	0	0	0	0	0	0	0	0	NA	0	NA	0	0	0	0	0	0	0	0	0	0	0	0	0	0
SIXTH	Flexivirga	7	6	0	0	0	0	0	0	0	0	0	0	0	NA	0	NA	0	0	0	0	0	0	0	0	0	0	0	0	0	0
SEVENTH	unclassified_Flexivirga	1	1	0	0	0	0	0	0	0	0	0	0	0	NA	0	NA	0	0	0	0	0	0	0	0	0	0	0	0	0	0
SIXTH	Leekyejoonella	1	1	0	0	0	0	0	0	0	0	0	0	0	NA	0	NA	0	0	0	0	0	0	0	0	0	0	0	0	0	0
SIXTH	Luteipulveratus	4	4	0	0	0	0	0	0	0	0	0	0	0	NA	0	NA	0	0	0	0	0	0	0	0	0	0	0	0	0	0
SEVENTH	unclassified_Luteipulveratus	2	2	0	0	0	0	0	0	0	0	0	0	0	NA	0	NA	0	0	0	0	0	0	0	0	0	0	0	0	0	0
SIXTH	Metallococcus	1	1	0	0	0	0	0	0	0	0	0	0	0	NA	0	NA	0	0	0	0	0	0	0	0	0	0	0	0	0	0
SIXTH	Rudaeicoccus	1	1	0	0	0	0	0	0	0	0	0	0	0	NA	0	NA	0	0	0	0	0	0	0	0	0	0	0	0	0	0
SIXTH	Yimella	6	4	0	0	0	0	0	0	0	0	0	0	0	NA	0	NA	0	0	0	0	0	0	0	0	0	0	0	0	0	0
SEVENTH	unclassified_Yimella	4	3	0	0	0	0	0	0	0	0	0	0	0	NA	0	NA	0	0	0	0	0	0	0	0	0	0	0	0	0	0
FIFTH	Dermatophilaceae	59	11	0	0	0	0	0	0	0	0	0	0	0	NA	0	NA	0	0	0	0	0	0	0	0	0	0	0	0	0	0
SIXTH	Agilicoccus	1	1	0	0	0	0	0	0	0	0	0	0	0	NA	0	NA	0	0	0	0	0	0	0	0	0	0	0	0	0	0
SIXTH	Austwickia	4	2	0	0	0	0	0	0	0	0	0	0	0	NA	0	NA	0	0	0	0	0	0	0	0	0	0	0	0	0	0
SEVENTH	unclassified_Austwickia	1	1	0	0	0	0	0	0	0	0	0	0	0	NA	0	NA	0	0	0	0	0	0	0	0	0	0	0	0	0	0
SIXTH	Dermatophilus	43	1	0	0	0	0	0	0	0	0	0	0	0	NA	0	NA	0	0	0	0	0	0	0	0	0	0	0	0	0	0
SIXTH	Gephyromycinifex	1	1	0	0	0	0	0	0	0	0	0	0	0	NA	0	NA	0	0	0	0	0	0	0	0	0	0	0	0	0	0
SIXTH	Kineosphaera	2	1	0	0	0	0	0	0	0	0	0	0	0	NA	0	NA	0	0	0	0	0	0	0	0	0	0	0	0	0	0
SIXTH	Mobilicoccus	7	4	0	0	0	0	0	0	0	0	0	0	0	NA	0	NA	0	0	0	0	0	0	0	0	0	0	0	0	0	0
SEVENTH	unclassified_Mobilicoccus	3	1	0	0	0	0	0	0	0	0	0	0	0	NA	0	NA	0	0	0	0	0	0	0	0	0	0	0	0	0	0
SIXTH	Piscicoccus	1	1	0	0	0	0	0	0	0	0	0	0	0	NA	0	NA	0	0	0	0	0	0	0	0	0	0	0	0	0	0
FIFTH	Intrasporangiaceae	195	124	0	0	0	0	0	0	0	0	0	0	0	NA	0	NA	0	0	0	0	0	0	0	0	0	0	0	0	0	0
SIXTH	Aquipuribacter	3	3	0	0	0	0	0	0	0	0	0	0	0	NA	0	NA	0	0	0	0	0	0	0	0	0	0	0	0	0	0
SEVENTH	unclassified_Aquipuribacter	1	1	0	0	0	0	0	0	0	0	0	0	0	NA	0	NA	0	0	0	0	0	0	0	0	0	0	0	0	0	0
SIXTH	Arsenicicoccus	15	9	0	0	0	0	0	0	0	0	0	0	0	NA	0	NA	0	0	0	0	0	0	0	0	0	0	0	0	0	0
SEVENTH	environmental_samples	2	1	0	0	0	0	0	0	0	0	0	0	0	NA	0	NA	0	0	0	0	0	0	0	0	0	0	0	0	0	0
SEVENTH	unclassified_Arsenicicoccus	4	4	0	0	0	0	0	0	0	0	0	0	0	NA	0	NA	0	0	0	0	0	0	0	0	0	0	0	0	0	0
SIXTH	Fodinibacter	1	1	0	0	0	0	0	0	0	0	0	0	0	NA	0	NA	0	0	0	0	0	0	0	0	0	0	0	0	0	0
SIXTH	Humibacillus	4	2	0	0	0	0	0	0	0	0	0	0	0	NA	0	NA	0	0	0	0	0	0	0	0	0	0	0	0	0	0
SEVENTH	unclassified_Humibacillus	1	1	0	0	0	0	0	0	0	0	0	0	0	NA	0	NA	0	0	0	0	0	0	0	0	0	0	0	0	0	0
SIXTH	Intrasporangium	15	7	0	0	0	0	0	0	0	0	0	0	0	NA	0	NA	0	0	0	0	0	0	0	0	0	0	0	0	0	0
SEVENTH	unclassified_Intrasporangium	9	3	0	0	0	0	0	0	0	0	0	0	0	NA	0	NA	0	0	0	0	0	0	0	0	0	0	0	0	0	0
SIXTH	Janibacter	53	22	0	0	0	0	0	0	0	0	0	0	0	NA	0	NA	0	0	0	0	0	0	0	0	0	0	0	0	0	0
SEVENTH	unclassified_Janibacter	11	11	0	0	0	0	0	0	0	0	0	0	0	NA	0	NA	0	0	0	0	0	0	0	0	0	0	0	0	0	0
SIXTH	Knoellia	13	11	0	0	0	0	0	0	0	0	0	0	0	NA	0	NA	0	0	0	0	0	0	0	0	0	0	0	0	0	0
SEVENTH	unclassified_Knoellia	4	4	0	0	0	0	0	0	0	0	0	0	0	NA	0	NA	0	0	0	0	0	0	0	0	0	0	0	0	0	0
SIXTH	Kribbia	1	1	0	0	0	0	0	0	0	0	0	0	0	NA	0	NA	0	0	0	0	0	0	0	0	0	0	0	0	0	0
SIXTH	Lapillicoccus	5	2	0	0	0	0	0	0	0	0	0	0	0	NA	0	NA	0	0	0	0	0	0	0	0	0	0	0	0	0	0
SEVENTH	unclassified_Lapillicoccus	3	1	0	0	0	0	0	0	0	0	0	0	0	NA	0	NA	0	0	0	0	0	0	0	0	0	0	0	0	0	0
SIXTH	Marihabitans	2	1	0	0	0	0	0	0	0	0	0	0	0	NA	0	NA	0	0	0	0	0	0	0	0	0	0	0	0	0	0
SIXTH	Nostocoides	9	9	0	0	0	0	0	0	0	0	0	0	0	NA	0	NA	0	0	0	0	0	0	0	0	0	0	0	0	0	0
SEVENTH	unclassified_Nostocoides	4	4	0	0	0	0	0	0	0	0	0	0	0	NA	0	NA	0	0	0	0	0	0	0	0	0	0	0	0	0	0
SIXTH	Ornithinibacter	3	2	0	0	0	0	0	0	0	0	0	0	0	NA	0	NA	0	0	0	0	0	0	0	0	0	0	0	0	0	0
SEVENTH	unclassified_Ornithinibacter	1	1	0	0	0	0	0	0	0	0	0	0	0	NA	0	NA	0	0	0	0	0	0	0	0	0	0	0	0	0	0
SIXTH	Ornithinicoccus	3	2	0	0	0	0	0	0	0	0	0	0	0	NA	0	NA	0	0	0	0	0	0	0	0	0	0	0	0	0	0
SIXTH	Oryzihumus	3	2	0	0	0	0	0	0	0	0	0	0	0	NA	0	NA	0	0	0	0	0	0	0	0	0	0	0	0	0	0
SEVENTH	unclassified_Oryzihumus	1	1	0	0	0	0	0	0	0	0	0	0	0	NA	0	NA	0	0	0	0	0	0	0	0	0	0	0	0	0	0
SIXTH	Pedococcus	10	8	0	0	0	0	0	0	0	0	0	0	0	NA	0	NA	0	0	0	0	0	0	0	0	0	0	0	0	0	0
SEVENTH	unclassified_Pedococcus	3	2	0	0	0	0	0	0	0	0	0	0	0	NA	0	NA	0	0	0	0	0	0	0	0	0	0	0	0	0	0
SIXTH	Phycicoccus	30	21	0	0	0	0	0	0	0	0	0	0	0	NA	0	NA	0	0	0	0	0	0	0	0	0	0	0	0	0	0
SEVENTH	environmental_samples	1	1	0	0	0	0	0	0	0	0	0	0	0	NA	0	NA	0	0	0	0	0	0	0	0	0	0	0	0	0	0
SEVENTH	unclassified_Phycicoccus	15	12	0	0	0	0	0	0	0	0	0	0	0	NA	0	NA	0	0	0	0	0	0	0	0	0	0	0	0	0	0
SIXTH	Segeticoccus	3	2	0	0	0	0	0	0	0	0	0	0	0	NA	0	NA	0	0	0	0	0	0	0	0	0	0	0	0	0	0
SEVENTH	unclassified_Segeticoccus	1	1	0	0	0	0	0	0	0	0	0	0	0	NA	0	NA	0	0	0	0	0	0	0	0	0	0	0	0	0	0
SIXTH	Terrabacter	18	17	0	0	0	0	0	0	0	0	0	0	0	NA	0	NA	0	0	0	0	0	0	0	0	0	0	0	0	0	0
SEVENTH	unclassified_Terrabacter	10	10	0	0	0	0	0	0	0	0	0	0	0	NA	0	NA	0	0	0	0	0	0	0	0	0	0	0	0	0	0
SIXTH	Terracoccus	4	2	0	0	0	0	0	0	0	0	0	0	0	NA	0	NA	0	0	0	0	0	0	0	0	0	0	0	0	0	0
SEVENTH	unclassified_Terracoccus	1	1	0	0	0	0	0	0	0	0	0	0	0	NA	0	NA	0	0	0	0	0	0	0	0	0	0	0	0	0	0
FIFTH	Jonesiaceae	9	5	0	0	0	0	0	0	0	0	0	0	0	NA	0	NA	0	0	0	0	0	0	0	0	0	0	0	0	0	0
SIXTH	Flavimobilis	4	3	0	0	0	0	0	0	0	0	0	0	0	NA	0	NA	0	0	0	0	0	0	0	0	0	0	0	0	0	0
SIXTH	Jonesia	5	2	0	0	0	0	0	0	0	0	0	0	0	NA	0	NA	0	0	0	0	0	0	0	0	0	0	0	0	0	0
FIFTH	Kytococcaceae	10	4	0	0	0	0	0	0	0	0	0	0	0	NA	0	NA	0	0	0	0	0	0	0	0	0	0	0	0	0	0
SIXTH	Kytococcus	10	4	0	0	0	0	0	0	0	0	0	0	0	NA	0	NA	0	0	0	0	0	0	0	0	0	0	0	0	0	0
SEVENTH	unclassified_Kytococcus	1	1	0	0	0	0	0	0	0	0	0	0	0	NA	0	NA	0	0	0	0	0	0	0	0	0	0	0	0	0	0
FIFTH	Microbacteriaceae	2467	1521	0	0	0	0	0	0	0	0	0	0	0	NA	0	NA	0	0	0	0	0	0	0	0	0	0	0	0	0	0
SIXTH	Agreia	12	10	0	0	0	0	0	0	0	0	0	0	0	NA	0	NA	0	0	0	0	0	0	0	0	0	0	0	0	0	0
SEVENTH	unclassified_Agreia	8	8	0	0	0	0	0	0	0	0	0	0	0	NA	0	NA	0	0	0	0	0	0	0	0	0	0	0	0	0	0
SIXTH	Agrococcus	29	25	0	0	0	0	0	0	0	0	0	0	0	NA	0	NA	0	0	0	0	0	0	0	0	0	0	0	0	0	0
SEVENTH	environmental_samples	1	1	0	0	0	0	0	0	0	0	0	0	0	NA	0	NA	0	0	0	0	0	0	0	0	0	0	0	0	0	0
SEVENTH	unclassified_Agrococcus	12	12	0	0	0	0	0	0	0	0	0	0	0	NA	0	NA	0	0	0	0	0	0	0	0	0	0	0	0	0	0
SIXTH	Agromyces	100	71	0	0	0	0	0	0	0	0	0	0	0	NA	0	NA	0	0	0	0	0	0	0	0	0	0	0	0	0	0
SEVENTH	unclassified_Agromyces	29	29	0	0	0	0	0	0	0	0	0	0	0	NA	0	NA	0	0	0	0	0	0	0	0	0	0	0	0	0	0
SIXTH	Alpinimonas	1	1	0	0	0	0	0	0	0	0	0	0	0	NA	0	NA	0	0	0	0	0	0	0	0	0	0	0	0	0	0
SIXTH	Amnibacterium	11	7	0	0	0	0	0	0	0	0	0	0	0	NA	0	NA	0	0	0	0	0	0	0	0	0	0	0	0	0	0
SEVENTH	environmental_samples	3	1	0	0	0	0	0	0	0	0	0	0	0	NA	0	NA	0	0	0	0	0	0	0	0	0	0	0	0	0	0
SEVENTH	unclassified_Amnibacterium	3	2	0	0	0	0	0	0	0	0	0	0	0	NA	0	NA	0	0	0	0	0	0	0	0	0	0	0	0	0	0
SIXTH	Antiquaquibacter	2	1	0	0	0	0	0	0	0	0	0	0	0	NA	0	NA	0	0	0	0	0	0	0	0	0	0	0	0	0	0
SIXTH	Arenivirga	1	1	0	0	0	0	0	0	0	0	0	0	0	NA	0	NA	0	0	0	0	0	0	0	0	0	0	0	0	0	0
SIXTH	Aurantimicrobium	20	6	0	0	0	0	0	0	0	0	0	0	0	NA	0	NA	0	0	0	0	0	0	0	0	0	0	0	0	0	0
SEVENTH	environmental_samples	1	1	0	0	0	0	0	0	0	0	0	0	0	NA	0	NA	0	0	0	0	0	0	0	0	0	0	0	0	0	0
SEVENTH	unclassified_Aurantimicrobium	6	3	0	0	0	0	0	0	0	0	0	0	0	NA	0	NA	0	0	0	0	0	0	0	0	0	0	0	0	0	0
SIXTH	Canibacter	5	3	0	0	0	0	0	0	0	0	0	0	0	NA	0	NA	0	0	0	0	0	0	0	0	0	0	0	0	0	0
SIXTH	Clavibacter	191	16	0	0	0	0	0	0	0	0	0	0	0	NA	0	NA	0	0	0	0	0	0	0	0	0	0	0	0	0	0
SEVENTH	unclassified_Clavibacter	8	8	0	0	0	0	0	0	0	0	0	0	0	NA	0	NA	0	0	0	0	0	0	0	0	0	0	0	0	0	0
SIXTH	Cnuibacter	3	1	0	0	0	0	0	0	0	0	0	0	0	NA	0	NA	0	0	0	0	0	0	0	0	0	0	0	0	0	0
SIXTH	Compostimonas	1	1	0	0	0	0	0	0	0	0	0	0	0	NA	0	NA	0	0	0	0	0	0	0	0	0	0	0	0	0	0
SIXTH	Conyzicola	3	2	0	0	0	0	0	0	0	0	0	0	0	NA	0	NA	0	0	0	0	0	0	0	0	0	0	0	0	0	0
SIXTH	Cryobacterium	136	121	0	0	0	0	0	0	0	0	0	0	0	NA	0	NA	0	0	0	0	0	0	0	0	0	0	0	0	0	0
SEVENTH	unclassified_Cryobacterium	91	87	0	0	0	0	0	0	0	0	0	0	0	NA	0	NA	0	0	0	0	0	0	0	0	0	0	0	0	0	0
SIXTH	Cryocola	1	1	0	0	0	0	0	0	0	0	0	0	0	NA	0	NA	0	0	0	0	0	0	0	0	0	0	0	0	0	0
SEVENTH	unclassified_Cryocola	1	1	0	0	0	0	0	0	0	0	0	0	0	NA	0	NA	0	0	0	0	0	0	0	0	0	0	0	0	0	0
SIXTH	Curtobacterium	290	180	0	0	0	0	0	0	0	0	0	0	0	NA	0	NA	0	0	0	0	0	0	0	0	0	0	0	0	0	0
SEVENTH	environmental_samples	1	1	0	0	0	0	0	0	0	0	0	0	0	NA	0	NA	0	0	0	0	0	0	0	0	0	0	0	0	0	0
SEVENTH	unclassified_Curtobacterium	167	165	0	0	0	0	0	0	0	0	0	0	0	NA	0	NA	0	0	0	0	0	0	0	0	0	0	0	0	0	0
SIXTH	Diaminobutyricibacter	2	2	0	0	0	0	0	0	0	0	0	0	0	NA	0	NA	0	0	0	0	0	0	0	0	0	0	0	0	0	0
SEVENTH	unclassified_Diaminobutyricibacter	1	1	0	0	0	0	0	0	0	0	0	0	0	NA	0	NA	0	0	0	0	0	0	0	0	0	0	0	0	0	0
SIXTH	Diaminobutyricimonas	3	3	0	0	0	0	0	0	0	0	0	0	0	NA	0	NA	0	0	0	0	0	0	0	0	0	0	0	0	0	0
SEVENTH	unclassified_Diaminobutyricimonas	2	2	0	0	0	0	0	0	0	0	0	0	0	NA	0	NA	0	0	0	0	0	0	0	0	0	0	0	0	0	0
SIXTH	Frigoribacterium	50	45	0	0	0	0	0	0	0	0	0	0	0	NA	0	NA	0	0	0	0	0	0	0	0	0	0	0	0	0	0
SEVENTH	environmental_samples	1	1	0	0	0	0	0	0	0	0	0	0	0	NA	0	NA	0	0	0	0	0	0	0	0	0	0	0	0	0	0
SEVENTH	unclassified_Frigoribacterium	42	42	0	0	0	0	0	0	0	0	0	0	0	NA	0	NA	0	0	0	0	0	0	0	0	0	0	0	0	0	0
SIXTH	Frondihabitans	11	11	0	0	0	0	0	0	0	0	0	0	0	NA	0	NA	0	0	0	0	0	0	0	0	0	0	0	0	0	0
SEVENTH	unclassified_Frondihabitans	7	7	0	0	0	0	0	0	0	0	0	0	0	NA	0	NA	0	0	0	0	0	0	0	0	0	0	0	0	0	0
SIXTH	Galbitalea	3	2	0	0	0	0	0	0	0	0	0	0	0	NA	0	NA	0	0	0	0	0	0	0	0	0	0	0	0	0	0
SEVENTH	unclassified_Galbitalea	1	1	0	0	0	0	0	0	0	0	0	0	0	NA	0	NA	0	0	0	0	0	0	0	0	0	0	0	0	0	0
SIXTH	Glaciibacter	2	2	0	0	0	0	0	0	0	0	0	0	0	NA	0	NA	0	0	0	0	0	0	0	0	0	0	0	0	0	0
SIXTH	Glaciihabitans	6	6	0	0	0	0	0	0	0	0	0	0	0	NA	0	NA	0	0	0	0	0	0	0	0	0	0	0	0	0	0
SEVENTH	unclassified_Glaciihabitans	4	4	0	0	0	0	0	0	0	0	0	0	0	NA	0	NA	0	0	0	0	0	0	0	0	0	0	0	0	0	0
SIXTH	Gryllotalpicola	6	6	0	0	0	0	0	0	0	0	0	0	0	NA	0	NA	0	0	0	0	0	0	0	0	0	0	0	0	0	0
SEVENTH	unclassified_Gryllotalpicola	1	1	0	0	0	0	0	0	0	0	0	0	0	NA	0	NA	0	0	0	0	0	0	0	0	0	0	0	0	0	0
SIXTH	Gulosibacter	18	11	0	0	0	0	0	0	0	0	0	0	0	NA	0	NA	0	0	0	0	0	0	0	0	0	0	0	0	0	0
SEVENTH	environmental_samples	1	1	0	0	0	0	0	0	0	0	0	0	0	NA	0	NA	0	0	0	0	0	0	0	0	0	0	0	0	0	0
SEVENTH	unclassified_Gulosibacter	2	2	0	0	0	0	0	0	0	0	0	0	0	NA	0	NA	0	0	0	0	0	0	0	0	0	0	0	0	0	0
SIXTH	Herbiconiux	27	21	0	0	0	0	0	0	0	0	0	0	0	NA	0	NA	0	0	0	0	0	0	0	0	0	0	0	0	0	0
SEVENTH	unclassified_Herbiconiux	15	13	0	0	0	0	0	0	0	0	0	0	0	NA	0	NA	0	0	0	0	0	0	0	0	0	0	0	0	0	0
SIXTH	Homoserinibacter	3	3	0	0	0	0	0	0	0	0	0	0	0	NA	0	NA	0	0	0	0	0	0	0	0	0	0	0	0	0	0
SEVENTH	unclassified_Homoserinibacter	2	2	0	0	0	0	0	0	0	0	0	0	0	NA	0	NA	0	0	0	0	0	0	0	0	0	0	0	0	0	0
SIXTH	Homoserinimonas	2	2	0	0	0	0	0	0	0	0	0	0	0	NA	0	NA	0	0	0	0	0	0	0	0	0	0	0	0	0	0
SEVENTH	unclassified_Homoserinimonas	1	1	0	0	0	0	0	0	0	0	0	0	0	NA	0	NA	0	0	0	0	0	0	0	0	0	0	0	0	0	0
SIXTH	Humibacter	4	4	0	0	0	0	0	0	0	0	0	0	0	NA	0	NA	0	0	0	0	0	0	0	0	0	0	0	0	0	0
SEVENTH	unclassified_Humibacter	2	2	0	0	0	0	0	0	0	0	0	0	0	NA	0	NA	0	0	0	0	0	0	0	0	0	0	0	0	0	0
SIXTH	Klugiella	2	1	0	0	0	0	0	0	0	0	0	0	0	NA	0	NA	0	0	0	0	0	0	0	0	0	0	0	0	0	0
SIXTH	Labedella	5	4	0	0	0	0	0	0	0	0	0	0	0	NA	0	NA	0	0	0	0	0	0	0	0	0	0	0	0	0	0
SIXTH	Lacisediminihabitans	5	3	0	0	0	0	0	0	0	0	0	0	0	NA	0	NA	0	0	0	0	0	0	0	0	0	0	0	0	0	0
SEVENTH	unclassified_Lacisediminihabitans	3	1	0	0	0	0	0	0	0	0	0	0	0	NA	0	NA	0	0	0	0	0	0	0	0	0	0	0	0	0	0
SIXTH	Leifsonia	69	52	0	0	0	0	0	0	0	0	0	0	0	NA	0	NA	0	0	0	0	0	0	0	0	0	0	0	0	0	0
SEVENTH	environmental_samples	3	1	0	0	0	0	0	0	0	0	0	0	0	NA	0	NA	0	0	0	0	0	0	0	0	0	0	0	0	0	0
SEVENTH	unclassified_Leifsonia	40	39	0	0	0	0	0	0	0	0	0	0	0	NA	0	NA	0	0	0	0	0	0	0	0	0	0	0	0	0	0
SIXTH	Leucobacter	94	75	0	0	0	0	0	0	0	0	0	0	0	NA	0	NA	0	0	0	0	0	0	0	0	0	0	0	0	0	0
SEVENTH	unclassified_Leucobacter	43	43	0	0	0	0	0	0	0	0	0	0	0	NA	0	NA	0	0	0	0	0	0	0	0	0	0	0	0	0	0
SIXTH	Luna_cluster	13	9	0	0	0	0	0	0	0	0	0	0	0	NA	0	NA	0	0	0	0	0	0	0	0	0	0	0	0	0	0
SEVENTH	Luna	13	9	0	0	0	0	0	0	0	0	0	0	0	NA	0	NA	0	0	0	0	0	0	0	0	0	0	0	0	0	0
EIGHTH	1_subcluster	13	9	0	0	0	0	0	0	0	0	0	0	0	NA	0	NA	0	0	0	0	0	0	0	0	0	0	0	0	0	0
NINTH	Aquiluna	4	4	0	0	0	0	0	0	0	0	0	0	0	NA	0	NA	0	0	0	0	0	0	0	0	0	0	0	0	0	0
NINTH	Rhodoluna	9	5	0	0	0	0	0	0	0	0	0	0	0	NA	0	NA	0	0	0	0	0	0	0	0	0	0	0	0	0	0
SIXTH	Lysinibacter	2	2	0	0	0	0	0	0	0	0	0	0	0	NA	0	NA	0	0	0	0	0	0	0	0	0	0	0	0	0	0
SEVENTH	unclassified_Lysinibacter	1	1	0	0	0	0	0	0	0	0	0	0	0	NA	0	NA	0	0	0	0	0	0	0	0	0	0	0	0	0	0
SIXTH	Marisediminicola	3	3	0	0	0	0	0	0	0	0	0	0	0	NA	0	NA	0	0	0	0	0	0	0	0	0	0	0	0	0	0
SEVENTH	unclassified_Marisediminicola	1	1	0	0	0	0	0	0	0	0	0	0	0	NA	0	NA	0	0	0	0	0	0	0	0	0	0	0	0	0	0
SIXTH	Microbacterium	931	548	0	0	0	0	0	0	0	0	0	0	0	NA	0	NA	0	0	0	0	0	0	0	0	0	0	0	0	0	0
SEVENTH	environmental_samples	48	1	0	0	0	0	0	0	0	0	0	0	0	NA	0	NA	0	0	0	0	0	0	0	0	0	0	0	0	0	0
SEVENTH	unclassified_Microbacterium	468	404	0	0	0	0	0	0	0	0	0	0	0	NA	0	NA	0	0	0	0	0	0	0	0	0	0	0	0	0	0
SIXTH	Microcella	27	13	0	0	0	0	0	0	0	0	0	0	0	NA	0	NA	0	0	0	0	0	0	0	0	0	0	0	0	0	0
SEVENTH	unclassified_Microcella	8	4	0	0	0	0	0	0	0	0	0	0	0	NA	0	NA	0	0	0	0	0	0	0	0	0	0	0	0	0	0
SIXTH	Microterricola	4	3	0	0	0	0	0	0	0	0	0	0	0	NA	0	NA	0	0	0	0	0	0	0	0	0	0	0	0	0	0
SIXTH	Mycetocola	18	14	0	0	0	0	0	0	0	0	0	0	0	NA	0	NA	0	0	0	0	0	0	0	0	0	0	0	0	0	0
SEVENTH	unclassified_Mycetocola	5	5	0	0	0	0	0	0	0	0	0	0	0	NA	0	NA	0	0	0	0	0	0	0	0	0	0	0	0	0	0
SIXTH	Naasia	5	5	0	0	0	0	0	0	0	0	0	0	0	NA	0	NA	0	0	0	0	0	0	0	0	0	0	0	0	0	0
SEVENTH	unclassified_Naasia	3	3	0	0	0	0	0	0	0	0	0	0	0	NA	0	NA	0	0	0	0	0	0	0	0	0	0	0	0	0	0
SIXTH	Okibacterium	2	2	0	0	0	0	0	0	0	0	0	0	0	NA	0	NA	0	0	0	0	0	0	0	0	0	0	0	0	0	0
SEVENTH	unclassified_Okibacterium	1	1	0	0	0	0	0	0	0	0	0	0	0	NA	0	NA	0	0	0	0	0	0	0	0	0	0	0	0	0	0
SIXTH	Parafrigoribacterium	3	3	0	0	0	0	0	0	0	0	0	0	0	NA	0	NA	0	0	0	0	0	0	0	0	0	0	0	0	0	0
SEVENTH	unclassified_Parafrigoribacterium	2	2	0	0	0	0	0	0	0	0	0	0	0	NA	0	NA	0	0	0	0	0	0	0	0	0	0	0	0	0	0
SIXTH	Paramicrobacterium	7	4	0	0	0	0	0	0	0	0	0	0	0	NA	0	NA	0	0	0	0	0	0	0	0	0	0	0	0	0	0
SIXTH	Planctomonas	3	3	0	0	0	0	0	0	0	0	0	0	0	NA	0	NA	0	0	0	0	0	0	0	0	0	0	0	0	0	0
SEVENTH	unclassified_Planctomonas	1	1	0	0	0	0	0	0	0	0	0	0	0	NA	0	NA	0	0	0	0	0	0	0	0	0	0	0	0	0	0
SIXTH	Plantibacter	31	25	0	0	0	0	0	0	0	0	0	0	0	NA	0	NA	0	0	0	0	0	0	0	0	0	0	0	0	0	0
SEVENTH	environmental_samples	1	1	0	0	0	0	0	0	0	0	0	0	0	NA	0	NA	0	0	0	0	0	0	0	0	0	0	0	0	0	0
SEVENTH	unclassified_Plantibacter	22	22	0	0	0	0	0	0	0	0	0	0	0	NA	0	NA	0	0	0	0	0	0	0	0	0	0	0	0	0	0
SIXTH	Pontimonas	3	2	0	0	0	0	0	0	0	0	0	0	0	NA	0	NA	0	0	0	0	0	0	0	0	0	0	0	0	0	0
SEVENTH	unclassified_Pontimonas	2	1	0	0	0	0	0	0	0	0	0	0	0	NA	0	NA	0	0	0	0	0	0	0	0	0	0	0	0	0	0
SIXTH	Protaetiibacter	4	4	0	0	0	0	0	0	0	0	0	0	0	NA	0	NA	0	0	0	0	0	0	0	0	0	0	0	0	0	0
SEVENTH	unclassified_Protaetiibacter	1	1	0	0	0	0	0	0	0	0	0	0	0	NA	0	NA	0	0	0	0	0	0	0	0	0	0	0	0	0	0
SIXTH	Pseudoclavibacter	40	30	0	0	0	0	0	0	0	0	0	0	0	NA	0	NA	0	0	0	0	0	0	0	0	0	0	0	0	0	0
SEVENTH	unclassified_Pseudoclavibacter	23	23	0	0	0	0	0	0	0	0	0	0	0	NA	0	NA	0	0	0	0	0	0	0	0	0	0	0	0	0	0
SIXTH	Pseudolysinimonas	5	3	0	0	0	0	0	0	0	0	0	0	0	NA	0	NA	0	0	0	0	0	0	0	0	0	0	0	0	0	0
SEVENTH	unclassified_Pseudolysinimonas	2	1	0	0	0	0	0	0	0	0	0	0	0	NA	0	NA	0	0	0	0	0	0	0	0	0	0	0	0	0	0
SIXTH	Rathayibacter	181	99	0	0	0	0	0	0	0	0	0	0	0	NA	0	NA	0	0	0	0	0	0	0	0	0	0	0	0	0	0
SEVENTH	unclassified_Rathayibacter	89	89	0	0	0	0	0	0	0	0	0	0	0	NA	0	NA	0	0	0	0	0	0	0	0	0	0	0	0	0	0
SIXTH	Rhodoglobus	2	2	0	0	0	0	0	0	0	0	0	0	0	NA	0	NA	0	0	0	0	0	0	0	0	0	0	0	0	0	0
SIXTH	Ruicaihuangia	2	1	0	0	0	0	0	0	0	0	0	0	0	NA	0	NA	0	0	0	0	0	0	0	0	0	0	0	0	0	0
SIXTH	Salinibacterium	38	31	0	0	0	0	0	0	0	0	0	0	0	NA	0	NA	0	0	0	0	0	0	0	0	0	0	0	0	0	0
SEVENTH	environmental_samples	1	1	0	0	0	0	0	0	0	0	0	0	0	NA	0	NA	0	0	0	0	0	0	0	0	0	0	0	0	0	0
SEVENTH	unclassified_Salinibacterium	26	24	0	0	0	0	0	0	0	0	0	0	0	NA	0	NA	0	0	0	0	0	0	0	0	0	0	0	0	0	0
SIXTH	Schumannella	4	4	0	0	0	0	0	0	0	0	0	0	0	NA	0	NA	0	0	0	0	0	0	0	0	0	0	0	0	0	0
SEVENTH	environmental_samples	1	1	0	0	0	0	0	0	0	0	0	0	0	NA	0	NA	0	0	0	0	0	0	0	0	0	0	0	0	0	0
SEVENTH	unclassified_Schumannella	1	1	0	0	0	0	0	0	0	0	0	0	0	NA	0	NA	0	0	0	0	0	0	0	0	0	0	0	0	0	0
SIXTH	Subtercola	17	9	0	0	0	0	0	0	0	0	0	0	0	NA	0	NA	0	0	0	0	0	0	0	0	0	0	0	0	0	0
SEVENTH	unclassified_Subtercola	4	4	0	0	0	0	0	0	0	0	0	0	0	NA	0	NA	0	0	0	0	0	0	0	0	0	0	0	0	0	0
SIXTH	Terrimesophilobacter	4	2	0	0	0	0	0	0	0	0	0	0	0	NA	0	NA	0	0	0	0	0	0	0	0	0	0	0	0	0	0
SEVENTH	unclassified_Terrimesophilobacter	1	1	0	0	0	0	0	0	0	0	0	0	0	NA	0	NA	0	0	0	0	0	0	0	0	0	0	0	0	0	0
FIFTH	Micrococcaceae	1809	842	0	0	0	0	0	0	0	0	0	0	0	NA	0	NA	0	0	0	0	0	0	0	0	0	0	0	0	0	0
SIXTH	Acaricomes	2	1	0	0	0	0	0	0	0	0	0	0	0	NA	0	NA	0	0	0	0	0	0	0	0	0	0	0	0	0	0
SIXTH	Arthrobacter	487	377	0	0	0	0	0	0	0	0	0	0	0	NA	0	NA	0	0	0	0	0	0	0	0	0	0	0	0	0	0
SEVENTH	environmental_samples	6	1	0	0	0	0	0	0	0	0	0	0	0	NA	0	NA	0	0	0	0	0	0	0	0	0	0	0	0	0	0
SEVENTH	unclassified_Arthrobacter	320	299	0	0	0	0	0	0	0	0	0	0	0	NA	0	NA	0	0	0	0	0	0	0	0	0	0	0	0	0	0
SIXTH	Auritidibacter	15	4	0	0	0	0	0	0	0	0	0	0	0	NA	0	NA	0	0	0	0	0	0	0	0	0	0	0	0	0	0
SEVENTH	unclassified_Auritidibacter	3	3	0	0	0	0	0	0	0	0	0	0	0	NA	0	NA	0	0	0	0	0	0	0	0	0	0	0	0	0	0
SIXTH	Citricoccus	19	13	0	0	0	0	0	0	0	0	0	0	0	NA	0	NA	0	0	0	0	0	0	0	0	0	0	0	0	0	0
SEVENTH	environmental_samples	1	1	0	0	0	0	0	0	0	0	0	0	0	NA	0	NA	0	0	0	0	0	0	0	0	0	0	0	0	0	0
SEVENTH	unclassified_Citricoccus	11	8	0	0	0	0	0	0	0	0	0	0	0	NA	0	NA	0	0	0	0	0	0	0	0	0	0	0	0	0	0
SIXTH	Enteractinococcus	6	3	0	0	0	0	0	0	0	0	0	0	0	NA	0	NA	0	0	0	0	0	0	0	0	0	0	0	0	0	0
SIXTH	Falsarthrobacter	2	1	0	0	0	0	0	0	0	0	0	0	0	NA	0	NA	0	0	0	0	0	0	0	0	0	0	0	0	0	0
SIXTH	Galactobacter	3	3	0	0	0	0	0	0	0	0	0	0	0	NA	0	NA	0	0	0	0	0	0	0	0	0	0	0	0	0	0
SEVENTH	unclassified_Galactobacter	1	1	0	0	0	0	0	0	0	0	0	0	0	NA	0	NA	0	0	0	0	0	0	0	0	0	0	0	0	0	0
SIXTH	Garicola	2	1	0	0	0	0	0	0	0	0	0	0	0	NA	0	NA	0	0	0	0	0	0	0	0	0	0	0	0	0	0
SIXTH	Glutamicibacter	65	26	0	0	0	0	0	0	0	0	0	0	0	NA	0	NA	0	0	0	0	0	0	0	0	0	0	0	0	0	0
SEVENTH	unclassified_Glutamicibacter	28	15	0	0	0	0	0	0	0	0	0	0	0	NA	0	NA	0	0	0	0	0	0	0	0	0	0	0	0	0	0
SIXTH	Haematomicrobium	1	1	0	0	0	0	0	0	0	0	0	0	0	NA	0	NA	0	0	0	0	0	0	0	0	0	0	0	0	0	0
SIXTH	Kocuria	223	71	0	0	0	0	0	0	0	0	0	0	0	NA	0	NA	0	0	0	0	0	0	0	0	0	0	0	0	0	0
SEVENTH	environmental_samples	3	1	0	0	0	0	0	0	0	0	0	0	0	NA	0	NA	0	0	0	0	0	0	0	0	0	0	0	0	0	0
SEVENTH	unclassified_Kocuria	56	46	0	0	0	0	0	0	0	0	0	0	0	NA	0	NA	0	0	0	0	0	0	0	0	0	0	0	0	0	0
SIXTH	Micrococcus	262	56	0	0	0	0	0	0	0	0	0	0	0	NA	0	NA	0	0	0	0	0	0	0	0	0	0	0	0	0	0
SEVENTH	environmental_samples	4	1	0	0	0	0	0	0	0	0	0	0	0	NA	0	NA	0	0	0	0	0	0	0	0	0	0	0	0	0	0
SEVENTH	unclassified_Micrococcus	46	45	0	0	0	0	0	0	0	0	0	0	0	NA	0	NA	0	0	0	0	0	0	0	0	0	0	0	0	0	0
SIXTH	Neomicrococcus	5	2	0	0	0	0	0	0	0	0	0	0	0	NA	0	NA	0	0	0	0	0	0	0	0	0	0	0	0	0	0
SIXTH	Nesterenkonia	51	41	0	0	0	0	0	0	0	0	0	0	0	NA	0	NA	0	0	0	0	0	0	0	0	0	0	0	0	0	0
SEVENTH	unclassified_Nesterenkonia	14	14	0	0	0	0	0	0	0	0	0	0	0	NA	0	NA	0	0	0	0	0	0	0	0	0	0	0	0	0	0
SIXTH	Paenarthrobacter	99	46	0	0	0	0	0	0	0	0	0	0	0	NA	0	NA	0	0	0	0	0	0	0	0	0	0	0	0	0	0
SEVENTH	unclassified_Paenarthrobacter	39	39	0	0	0	0	0	0	0	0	0	0	0	NA	0	NA	0	0	0	0	0	0	0	0	0	0	0	0	0	0
SIXTH	Paeniglutamicibacter	17	10	0	0	0	0	0	0	0	0	0	0	0	NA	0	NA	0	0	0	0	0	0	0	0	0	0	0	0	0	0
SEVENTH	unclassified_Paeniglutamicibacter	2	2	0	0	0	0	0	0	0	0	0	0	0	NA	0	NA	0	0	0	0	0	0	0	0	0	0	0	0	0	0
SIXTH	Pseudarthrobacter	117	75	0	0	0	0	0	0	0	0	0	0	0	NA	0	NA	0	0	0	0	0	0	0	0	0	0	0	0	0	0
SEVENTH	unclassified_Pseudarthrobacter	59	59	0	0	0	0	0	0	0	0	0	0	0	NA	0	NA	0	0	0	0	0	0	0	0	0	0	0	0	0	0
SIXTH	Pseudoglutamicibacter	11	2	0	0	0	0	0	0	0	0	0	0	0	NA	0	NA	0	0	0	0	0	0	0	0	0	0	0	0	0	0
SIXTH	Psychromicrobium	3	3	0	0	0	0	0	0	0	0	0	0	0	NA	0	NA	0	0	0	0	0	0	0	0	0	0	0	0	0	0
SIXTH	Renibacterium	3	1	0	0	0	0	0	0	0	0	0	0	0	NA	0	NA	0	0	0	0	0	0	0	0	0	0	0	0	0	0
SIXTH	Rothia	366	69	0	0	0	0	0	0	0	0	0	0	0	NA	0	NA	0	0	0	0	0	0	0	0	0	0	0	0	0	0
SEVENTH	environmental_samples	52	1	0	0	0	0	0	0	0	0	0	0	0	NA	0	NA	0	0	0	0	0	0	0	0	0	0	0	0	0	0
SEVENTH	unclassified_Rothia_in_high_G_C_Gram_positive_bacteria	64	55	0	0	0	0	0	0	0	0	0	0	0	NA	0	NA	0	0	0	0	0	0	0	0	0	0	0	0	0	0
SIXTH	Sinomonas	25	18	0	0	0	0	0	0	0	0	0	0	0	NA	0	NA	0	0	0	0	0	0	0	0	0	0	0	0	0	0
SEVENTH	unclassified_Sinomonas	5	5	0	0	0	0	0	0	0	0	0	0	0	NA	0	NA	0	0	0	0	0	0	0	0	0	0	0	0	0	0
SIXTH	Specibacter	3	3	0	0	0	0	0	0	0	0	0	0	0	NA	0	NA	0	0	0	0	0	0	0	0	0	0	0	0	0	0
SEVENTH	unclassified_Specibacter	2	2	0	0	0	0	0	0	0	0	0	0	0	NA	0	NA	0	0	0	0	0	0	0	0	0	0	0	0	0	0
SIXTH	Tersicoccus	4	4	0	0	0	0	0	0	0	0	0	0	0	NA	0	NA	0	0	0	0	0	0	0	0	0	0	0	0	0	0
SEVENTH	unclassified_Tersicoccus	2	2	0	0	0	0	0	0	0	0	0	0	0	NA	0	NA	0	0	0	0	0	0	0	0	0	0	0	0	0	0
SIXTH	Yaniella	8	3	0	0	0	0	0	0	0	0	0	0	0	NA	0	NA	0	0	0	0	0	0	0	0	0	0	0	0	0	0
SEVENTH	unclassified_Yaniella	6	1	0	0	0	0	0	0	0	0	0	0	0	NA	0	NA	0	0	0	0	0	0	0	0	0	0	0	0	0	0
SIXTH	Zafaria	2	2	0	0	0	0	0	0	0	0	0	0	0	NA	0	NA	0	0	0	0	0	0	0	0	0	0	0	0	0	0
SEVENTH	unclassified_Zafaria	1	1	0	0	0	0	0	0	0	0	0	0	0	NA	0	NA	0	0	0	0	0	0	0	0	0	0	0	0	0	0
SIXTH	Zhihengliuella	8	6	0	0	0	0	0	0	0	0	0	0	0	NA	0	NA	0	0	0	0	0	0	0	0	0	0	0	0	0	0
SEVENTH	unclassified_Zhihengliuella	3	2	0	0	0	0	0	0	0	0	0	0	0	NA	0	NA	0	0	0	0	0	0	0	0	0	0	0	0	0	0
FIFTH	Micrococcales_incertae_sedis	11	7	0	0	0	0	0	0	0	0	0	0	0	NA	0	NA	0	0	0	0	0	0	0	0	0	0	0	0	0	0
SIXTH	Luteimicrobium	4	3	0	0	0	0	0	0	0	0	0	0	0	NA	0	NA	0	0	0	0	0	0	0	0	0	0	0	0	0	0
SIXTH	Pengzhenrongella	3	3	0	0	0	0	0	0	0	0	0	0	0	NA	0	NA	0	0	0	0	0	0	0	0	0	0	0	0	0	0
SEVENTH	unclassified_Pengzhenrongella	1	1	0	0	0	0	0	0	0	0	0	0	0	NA	0	NA	0	0	0	0	0	0	0	0	0	0	0	0	0	0
SIXTH	Timonella	4	1	0	0	0	0	0	0	0	0	0	0	0	NA	0	NA	0	0	0	0	0	0	0	0	0	0	0	0	0	0
FIFTH	Ornithinimicrobiaceae	49	29	0	0	0	0	0	0	0	0	0	0	0	NA	0	NA	0	0	0	0	0	0	0	0	0	0	0	0	0	0
SIXTH	Ornithinimicrobium	32	20	0	0	0	0	0	0	0	0	0	0	0	NA	0	NA	0	0	0	0	0	0	0	0	0	0	0	0	0	0
SEVENTH	environmental_samples	1	1	0	0	0	0	0	0	0	0	0	0	0	NA	0	NA	0	0	0	0	0	0	0	0	0	0	0	0	0	0
SEVENTH	unclassified_Ornithinimicrobium	5	4	0	0	0	0	0	0	0	0	0	0	0	NA	0	NA	0	0	0	0	0	0	0	0	0	0	0	0	0	0
SIXTH	Serinicoccus	17	9	0	0	0	0	0	0	0	0	0	0	0	NA	0	NA	0	0	0	0	0	0	0	0	0	0	0	0	0	0
SEVENTH	environmental_samples	4	1	0	0	0	0	0	0	0	0	0	0	0	NA	0	NA	0	0	0	0	0	0	0	0	0	0	0	0	0	0
SEVENTH	unclassified_Serinicoccus	2	2	0	0	0	0	0	0	0	0	0	0	0	NA	0	NA	0	0	0	0	0	0	0	0	0	0	0	0	0	0
FIFTH	Promicromonosporaceae	116	70	0	0	0	0	0	0	0	0	0	0	0	NA	0	NA	0	0	0	0	0	0	0	0	0	0	0	0	0	0
SIXTH	Antribacter	2	2	0	0	0	0	0	0	0	0	0	0	0	NA	0	NA	0	0	0	0	0	0	0	0	0	0	0	0	0	0
SIXTH	Cellulosimicrobium	55	23	0	0	0	0	0	0	0	0	0	0	0	NA	0	NA	0	0	0	0	0	0	0	0	0	0	0	0	0	0
SEVENTH	environmental_samples	1	1	0	0	0	0	0	0	0	0	0	0	0	NA	0	NA	0	0	0	0	0	0	0	0	0	0	0	0	0	0
SEVENTH	unclassified_Cellulosimicrobium	18	15	0	0	0	0	0	0	0	0	0	0	0	NA	0	NA	0	0	0	0	0	0	0	0	0	0	0	0	0	0
SIXTH	Isoptericola	24	18	0	0	0	0	0	0	0	0	0	0	0	NA	0	NA	0	0	0	0	0	0	0	0	0	0	0	0	0	0
SEVENTH	unclassified_Isoptericola	7	7	0	0	0	0	0	0	0	0	0	0	0	NA	0	NA	0	0	0	0	0	0	0	0	0	0	0	0	0	0
SIXTH	Krasilnikoviella	1	1	0	0	0	0	0	0	0	0	0	0	0	NA	0	NA	0	0	0	0	0	0	0	0	0	0	0	0	0	0
SIXTH	Myceligenerans	6	5	0	0	0	0	0	0	0	0	0	0	0	NA	0	NA	0	0	0	0	0	0	0	0	0	0	0	0	0	0
SIXTH	Promicromonospora	21	15	0	0	0	0	0	0	0	0	0	0	0	NA	0	NA	0	0	0	0	0	0	0	0	0	0	0	0	0	0
SEVENTH	unclassified_Promicromonospora	7	7	0	0	0	0	0	0	0	0	0	0	0	NA	0	NA	0	0	0	0	0	0	0	0	0	0	0	0	0	0
SIXTH	Puerhibacterium	1	1	0	0	0	0	0	0	0	0	0	0	0	NA	0	NA	0	0	0	0	0	0	0	0	0	0	0	0	0	0
SIXTH	Xylanimonas	6	5	0	0	0	0	0	0	0	0	0	0	0	NA	0	NA	0	0	0	0	0	0	0	0	0	0	0	0	0	0
FIFTH	Rarobacteraceae	4	2	0	0	0	0	0	0	0	0	0	0	0	NA	0	NA	0	0	0	0	0	0	0	0	0	0	0	0	0	0
SIXTH	Rarobacter	4	2	0	0	0	0	0	0	0	0	0	0	0	NA	0	NA	0	0	0	0	0	0	0	0	0	0	0	0	0	0
FIFTH	Ruaniaceae	14	11	0	0	0	0	0	0	0	0	0	0	0	NA	0	NA	0	0	0	0	0	0	0	0	0	0	0	0	0	0
SIXTH	Occultella	5	4	0	0	0	0	0	0	0	0	0	0	0	NA	0	NA	0	0	0	0	0	0	0	0	0	0	0	0	0	0
SIXTH	Ruania	9	7	0	0	0	0	0	0	0	0	0	0	0	NA	0	NA	0	0	0	0	0	0	0	0	0	0	0	0	0	0
FIFTH	Sanguibacteraceae	15	13	0	0	0	0	0	0	0	0	0	0	0	NA	0	NA	0	0	0	0	0	0	0	0	0	0	0	0	0	0
SIXTH	Sanguibacter	15	13	0	0	0	0	0	0	0	0	0	0	0	NA	0	NA	0	0	0	0	0	0	0	0	0	0	0	0	0	0
SEVENTH	unclassified_Sanguibacter	5	5	0	0	0	0	0	0	0	0	0	0	0	NA	0	NA	0	0	0	0	0	0	0	0	0	0	0	0	0	0
FIFTH	Tropherymataceae	19	1	0	0	0	0	0	0	0	0	0	0	0	NA	0	NA	0	0	0	0	0	0	0	0	0	0	0	0	0	0
SIXTH	Tropheryma	19	1	0	0	0	0	0	0	0	0	0	0	0	NA	0	NA	0	0	0	0	0	0	0	0	0	0	0	0	0	0
FORTH	Micromonosporales	947	631	0	0	0	0	0	0	0	0	0	0	0	NA	0	NA	0	0	0	0	0	0	0	0	0	0	0	0	0	0
FIFTH	Micromonosporaceae	947	631	0	0	0	0	0	0	0	0	0	0	0	NA	0	NA	0	0	0	0	0	0	0	0	0	0	0	0	0	0
SIXTH	Actinocatenispora	8	4	0	0	0	0	0	0	0	0	0	0	0	NA	0	NA	0	0	0	0	0	0	0	0	0	0	0	0	0	0
SIXTH	Actinoplanes	92	64	0	0	0	0	0	0	0	0	0	0	0	NA	0	NA	0	0	0	0	0	0	0	0	0	0	0	0	0	0
SEVENTH	unclassified_Actinoplanes	37	36	0	0	0	0	0	0	0	0	0	0	0	NA	0	NA	0	0	0	0	0	0	0	0	0	0	0	0	0	0
SIXTH	Actinorhabdospora	1	1	0	0	0	0	0	0	0	0	0	0	0	NA	0	NA	0	0	0	0	0	0	0	0	0	0	0	0	0	0
SIXTH	Allocatelliglobosispora	1	1	0	0	0	0	0	0	0	0	0	0	0	NA	0	NA	0	0	0	0	0	0	0	0	0	0	0	0	0	0
SIXTH	Allorhizocola	1	1	0	0	0	0	0	0	0	0	0	0	0	NA	0	NA	0	0	0	0	0	0	0	0	0	0	0	0	0	0
SIXTH	Amorphoplanes	7	4	0	0	0	0	0	0	0	0	0	0	0	NA	0	NA	0	0	0	0	0	0	0	0	0	0	0	0	0	0
SIXTH	Asanoa	13	10	0	0	0	0	0	0	0	0	0	0	0	NA	0	NA	0	0	0	0	0	0	0	0	0	0	0	0	0	0
SEVENTH	unclassified_Asanoa	5	5	0	0	0	0	0	0	0	0	0	0	0	NA	0	NA	0	0	0	0	0	0	0	0	0	0	0	0	0	0
SIXTH	Catellatospora	24	15	0	0	0	0	0	0	0	0	0	0	0	NA	0	NA	0	0	0	0	0	0	0	0	0	0	0	0	0	0
SEVENTH	unclassified_Catellatospora	6	6	0	0	0	0	0	0	0	0	0	0	0	NA	0	NA	0	0	0	0	0	0	0	0	0	0	0	0	0	0
SIXTH	Catelliglobosispora	1	1	0	0	0	0	0	0	0	0	0	0	0	NA	0	NA	0	0	0	0	0	0	0	0	0	0	0	0	0	0
SIXTH	Catenuloplanes	5	5	0	0	0	0	0	0	0	0	0	0	0	NA	0	NA	0	0	0	0	0	0	0	0	0	0	0	0	0	0
SIXTH	Couchioplanes	4	1	0	0	0	0	0	0	0	0	0	0	0	NA	0	NA	0	0	0	0	0	0	0	0	0	0	0	0	0	0
SIXTH	Dactylosporangium	31	24	0	0	0	0	0	0	0	0	0	0	0	NA	0	NA	0	0	0	0	0	0	0	0	0	0	0	0	0	0
SEVENTH	unclassified_Dactylosporangium	14	14	0	0	0	0	0	0	0	0	0	0	0	NA	0	NA	0	0	0	0	0	0	0	0	0	0	0	0	0	0
SIXTH	Hamadaea	5	5	0	0	0	0	0	0	0	0	0	0	0	NA	0	NA	0	0	0	0	0	0	0	0	0	0	0	0	0	0
SEVENTH	unclassified_Hamadaea	3	3	0	0	0	0	0	0	0	0	0	0	0	NA	0	NA	0	0	0	0	0	0	0	0	0	0	0	0	0	0
SIXTH	Jidongwangia	1	1	0	0	0	0	0	0	0	0	0	0	0	NA	0	NA	0	0	0	0	0	0	0	0	0	0	0	0	0	0
SIXTH	Krasilnikovia	1	1	0	0	0	0	0	0	0	0	0	0	0	NA	0	NA	0	0	0	0	0	0	0	0	0	0	0	0	0	0
SIXTH	Longispora	4	3	0	0	0	0	0	0	0	0	0	0	0	NA	0	NA	0	0	0	0	0	0	0	0	0	0	0	0	0	0
SEVENTH	unclassified_Longispora_in_high_G_C_Gram_positive_bacteria	1	1	0	0	0	0	0	0	0	0	0	0	0	NA	0	NA	0	0	0	0	0	0	0	0	0	0	0	0	0	0
SIXTH	Luedemannella	2	2	0	0	0	0	0	0	0	0	0	0	0	NA	0	NA	0	0	0	0	0	0	0	0	0	0	0	0	0	0
SIXTH	Mangrovihabitans	1	1	0	0	0	0	0	0	0	0	0	0	0	NA	0	NA	0	0	0	0	0	0	0	0	0	0	0	0	0	0
SIXTH	Micromonospora	624	406	0	0	0	0	0	0	0	0	0	0	0	NA	0	NA	0	0	0	0	0	0	0	0	0	0	0	0	0	0
SEVENTH	unclassified_Micromonospora	293	292	0	0	0	0	0	0	0	0	0	0	0	NA	0	NA	0	0	0	0	0	0	0	0	0	0	0	0	0	0
SIXTH	Natronosporangium	1	1	0	0	0	0	0	0	0	0	0	0	0	NA	0	NA	0	0	0	0	0	0	0	0	0	0	0	0	0	0
SIXTH	Nucisporomicrobium	1	1	0	0	0	0	0	0	0	0	0	0	0	NA	0	NA	0	0	0	0	0	0	0	0	0	0	0	0	0	0
SIXTH	Paractinoplanes	24	18	0	0	0	0	0	0	0	0	0	0	0	NA	0	NA	0	0	0	0	0	0	0	0	0	0	0	0	0	0
SIXTH	Phytohabitans	9	6	0	0	0	0	0	0	0	0	0	0	0	NA	0	NA	0	0	0	0	0	0	0	0	0	0	0	0	0	0
SIXTH	Phytomonospora	3	2	0	0	0	0	0	0	0	0	0	0	0	NA	0	NA	0	0	0	0	0	0	0	0	0	0	0	0	0	0
SEVENTH	unclassified_Phytomonospora	1	1	0	0	0	0	0	0	0	0	0	0	0	NA	0	NA	0	0	0	0	0	0	0	0	0	0	0	0	0	0
SIXTH	Pilimelia	3	3	0	0	0	0	0	0	0	0	0	0	0	NA	0	NA	0	0	0	0	0	0	0	0	0	0	0	0	0	0
SIXTH	Planosporangium	6	3	0	0	0	0	0	0	0	0	0	0	0	NA	0	NA	0	0	0	0	0	0	0	0	0	0	0	0	0	0
SIXTH	Plantactinospora	15	14	0	0	0	0	0	0	0	0	0	0	0	NA	0	NA	0	0	0	0	0	0	0	0	0	0	0	0	0	0
SEVENTH	unclassified_Plantactinospora	8	8	0	0	0	0	0	0	0	0	0	0	0	NA	0	NA	0	0	0	0	0	0	0	0	0	0	0	0	0	0
SIXTH	Polymorphospora	7	4	0	0	0	0	0	0	0	0	0	0	0	NA	0	NA	0	0	0	0	0	0	0	0	0	0	0	0	0	0
SEVENTH	unclassified_Polymorphospora	2	2	0	0	0	0	0	0	0	0	0	0	0	NA	0	NA	0	0	0	0	0	0	0	0	0	0	0	0	0	0
SIXTH	Pseudosporangium	1	1	0	0	0	0	0	0	0	0	0	0	0	NA	0	NA	0	0	0	0	0	0	0	0	0	0	0	0	0	0
SIXTH	Rhizocola	1	1	0	0	0	0	0	0	0	0	0	0	0	NA	0	NA	0	0	0	0	0	0	0	0	0	0	0	0	0	0
SIXTH	Rugosimonospora	2	2	0	0	0	0	0	0	0	0	0	0	0	NA	0	NA	0	0	0	0	0	0	0	0	0	0	0	0	0	0
SIXTH	Salinispora	28	9	0	0	0	0	0	0	0	0	0	0	0	NA	0	NA	0	0	0	0	0	0	0	0	0	0	0	0	0	0
SEVENTH	unclassified_Salinispora	1	1	0	0	0	0	0	0	0	0	0	0	0	NA	0	NA	0	0	0	0	0	0	0	0	0	0	0	0	0	0
SIXTH	Solwaraspora	9	9	0	0	0	0	0	0	0	0	0	0	0	NA	0	NA	0	0	0	0	0	0	0	0	0	0	0	0	0	0
SEVENTH	unclassified_Solwaraspora	9	9	0	0	0	0	0	0	0	0	0	0	0	NA	0	NA	0	0	0	0	0	0	0	0	0	0	0	0	0	0
SIXTH	Spirilliplanes	3	1	0	0	0	0	0	0	0	0	0	0	0	NA	0	NA	0	0	0	0	0	0	0	0	0	0	0	0	0	0
SIXTH	Symbioplanes	1	1	0	0	0	0	0	0	0	0	0	0	0	NA	0	NA	0	0	0	0	0	0	0	0	0	0	0	0	0	0
SIXTH	Virgisporangium	3	3	0	0	0	0	0	0	0	0	0	0	0	NA	0	NA	0	0	0	0	0	0	0	0	0	0	0	0	0	0
SIXTH	Winogradskya	4	2	0	0	0	0	0	0	0	0	0	0	0	NA	0	NA	0	0	0	0	0	0	0	0	0	0	0	0	0	0
FORTH	Motilibacterales	5	5	0	0	0	0	0	0	0	0	0	0	0	NA	0	NA	0	0	0	0	0	0	0	0	0	0	0	0	0	0
FIFTH	Motilibacteraceae	4	4	0	0	0	0	0	0	0	0	0	0	0	NA	0	NA	0	0	0	0	0	0	0	0	0	0	0	0	0	0
SIXTH	Motilibacter	4	4	0	0	0	0	0	0	0	0	0	0	0	NA	0	NA	0	0	0	0	0	0	0	0	0	0	0	0	0	0
FIFTH	Vallicoccaceae	1	1	0	0	0	0	0	0	0	0	0	0	0	NA	0	NA	0	0	0	0	0	0	0	0	0	0	0	0	0	0
SIXTH	Vallicoccus	1	1	0	0	0	0	0	0	0	0	0	0	0	NA	0	NA	0	0	0	0	0	0	0	0	0	0	0	0	0	0
FORTH	Mycobacteriales	15313	1875	2	2	0.0130608	2	0.106667	1	1	0.0065304	1	0.0533333	1	1	1	1	0	0	0	0	0	0	0	0	0	0	0	0	0	0
FIFTH	Corynebacteriaceae	2338	530	0	0	0	0	0	0	0	0	0	0	0	NA	0	NA	0	0	0	0	0	0	0	0	0	0	0	0	0	0
SIXTH	Corynebacterium	2338	530	0	0	0	0	0	0	0	0	0	0	0	NA	0	NA	0	0	0	0	0	0	0	0	0	0	0	0	0	0
SEVENTH	environmental_samples	70	1	0	0	0	0	0	0	0	0	0	0	0	NA	0	NA	0	0	0	0	0	0	0	0	0	0	0	0	0	0
SEVENTH	unclassified_Corynebacterium	395	351	0	0	0	0	0	0	0	0	0	0	0	NA	0	NA	0	0	0	0	0	0	0	0	0	0	0	0	0	0
FIFTH	Corynebacteriales_incertae_sedis	13	6	0	0	0	0	0	0	0	0	0	0	0	NA	0	NA	0	0	0	0	0	0	0	0	0	0	0	0	0	0
SIXTH	Fodinicola	3	2	0	0	0	0	0	0	0	0	0	0	0	NA	0	NA	0	0	0	0	0	0	0	0	0	0	0	0	0	0
SIXTH	Tomitella	10	4	0	0	0	0	0	0	0	0	0	0	0	NA	0	NA	0	0	0	0	0	0	0	0	0	0	0	0	0	0
FIFTH	Dietziaceae	106	46	0	0	0	0	0	0	0	0	0	0	0	NA	0	NA	0	0	0	0	0	0	0	0	0	0	0	0	0	0
SIXTH	Dietzia	106	46	0	0	0	0	0	0	0	0	0	0	0	NA	0	NA	0	0	0	0	0	0	0	0	0	0	0	0	0	0
SEVENTH	environmental_samples	3	1	0	0	0	0	0	0	0	0	0	0	0	NA	0	NA	0	0	0	0	0	0	0	0	0	0	0	0	0	0
SEVENTH	unclassified_Dietzia	33	32	0	0	0	0	0	0	0	0	0	0	0	NA	0	NA	0	0	0	0	0	0	0	0	0	0	0	0	0	0
FIFTH	Gordoniaceae	255	120	0	0	0	0	0	0	0	0	0	0	0	NA	0	NA	0	0	0	0	0	0	0	0	0	0	0	0	0	0
SIXTH	Gordonia	250	116	0	0	0	0	0	0	0	0	0	0	0	NA	0	NA	0	0	0	0	0	0	0	0	0	0	0	0	0	0
SEVENTH	environmental_samples	5	1	0	0	0	0	0	0	0	0	0	0	0	NA	0	NA	0	0	0	0	0	0	0	0	0	0	0	0	0	0
SEVENTH	unclassified_Gordonia_in_high_G_C_Gram_positive_bacteria	73	62	0	0	0	0	0	0	0	0	0	0	0	NA	0	NA	0	0	0	0	0	0	0	0	0	0	0	0	0	0
SIXTH	Jongsikchunia	1	1	0	0	0	0	0	0	0	0	0	0	0	NA	0	NA	0	0	0	0	0	0	0	0	0	0	0	0	0	0
SIXTH	Millisia	1	1	0	0	0	0	0	0	0	0	0	0	0	NA	0	NA	0	0	0	0	0	0	0	0	0	0	0	0	0	0
SIXTH	Skermania	3	2	0	0	0	0	0	0	0	0	0	0	0	NA	0	NA	0	0	0	0	0	0	0	0	0	0	0	0	0	0
SEVENTH	unclassified_Skermania	1	1	0	0	0	0	0	0	0	0	0	0	0	NA	0	NA	0	0	0	0	0	0	0	0	0	0	0	0	0	0
FIFTH	Hoyosellaceae	9	7	0	0	0	0	0	0	0	0	0	0	0	NA	0	NA	0	0	0	0	0	0	0	0	0	0	0	0	0	0
SIXTH	Hoyosella	6	4	0	0	0	0	0	0	0	0	0	0	0	NA	0	NA	0	0	0	0	0	0	0	0	0	0	0	0	0	0
SEVENTH	unclassified_Hoyosella	1	1	0	0	0	0	0	0	0	0	0	0	0	NA	0	NA	0	0	0	0	0	0	0	0	0	0	0	0	0	0
SIXTH	Lolliginicoccus	3	3	0	0	0	0	0	0	0	0	0	0	0	NA	0	NA	0	0	0	0	0	0	0	0	0	0	0	0	0	0
FIFTH	Lawsonellaceae	15	3	0	0	0	0	0	0	0	0	0	0	0	NA	0	NA	0	0	0	0	0	0	0	0	0	0	0	0	0	0
SIXTH	Lawsonella	15	3	0	0	0	0	0	0	0	0	0	0	0	NA	0	NA	0	0	0	0	0	0	0	0	0	0	0	0	0	0
SEVENTH	environmental_samples	2	1	0	0	0	0	0	0	0	0	0	0	0	NA	0	NA	0	0	0	0	0	0	0	0	0	0	0	0	0	0
SEVENTH	unclassified_Lawsonella	2	1	0	0	0	0	0	0	0	0	0	0	0	NA	0	NA	0	0	0	0	0	0	0	0	0	0	0	0	0	0
FIFTH	Mycobacteriaceae	11052	516	2	2	0.0180963	2	0.387597	1	1	0.00904814	1	0.193798	1	1	1	1	0	0	0	0	0	0	0	0	0	0	0	0	0	0
SIXTH	Mycobacterium	8317	311	1	1	0.0120236	1	0.321543	1	1	0.0120236	1	0.321543	1	1	1	1	0	0	0	0	0	0	0	0	0	0	0	0	0	0
SEVENTH	environmental_samples	1	1	0	0	0	0	0	0	0	0	0	0	0	NA	0	NA	0	0	0	0	0	0	0	0	0	0	0	0	0	0
SEVENTH	Mycobacterium_avium_complex_MAC	440	12	0	0	0	0	0	0	0	0	0	0	0	NA	0	NA	0	0	0	0	0	0	0	0	0	0	0	0	0	0
EIGHTH	unclassified_Mycobacterium_avium_complex_MAC	2	2	0	0	0	0	0	0	0	0	0	0	0	NA	0	NA	0	0	0	0	0	0	0	0	0	0	0	0	0	0
SEVENTH	Mycobacterium_simiae_complex	67	20	0	0	0	0	0	0	0	0	0	0	0	NA	0	NA	0	0	0	0	0	0	0	0	0	0	0	0	0	0
SEVENTH	Mycobacterium_tuberculosis_complex	7229	11	0	0	0	0	0	0	0	0	0	0	0	NA	0	NA	0	0	0	0	0	0	0	0	0	0	0	0	0	0
EIGHTH	unclassified_Mycobacterium_tuberculosis_complex	7	7	0	0	0	0	0	0	0	0	0	0	0	NA	0	NA	0	0	0	0	0	0	0	0	0	0	0	0	0	0
SEVENTH	unclassified_Mycobacterium	229	191	1	1	0.436681	1	0.52356	1	1	0.436681	1	0.52356	1	1	1	1	0	0	0	0	0	0	0	0	0	0	0	0	0	0
SIXTH	Mycobacteroides	2132	23	0	0	0	0	0	0	0	0	0	0	0	NA	0	NA	0	0	0	0	0	0	0	0	0	0	0	0	0	0
SEVENTH	unclassified_Mycobacteroides	16	16	0	0	0	0	0	0	0	0	0	0	0	NA	0	NA	0	0	0	0	0	0	0	0	0	0	0	0	0	0
SIXTH	Mycolicibacillus	7	3	0	0	0	0	0	0	0	0	0	0	0	NA	0	NA	0	0	0	0	0	0	0	0	0	0	0	0	0	0
SIXTH	Mycolicibacter	51	21	0	0	0	0	0	0	0	0	0	0	0	NA	0	NA	0	0	0	0	0	0	0	0	0	0	0	0	0	0
SEVENTH	unclassified_Mycolicibacter	2	2	0	0	0	0	0	0	0	0	0	0	0	NA	0	NA	0	0	0	0	0	0	0	0	0	0	0	0	0	0
SIXTH	Mycolicibacterium	545	158	1	1	0.183486	1	0.632911	0	0	0	0	0	0	NA	0	NA	0	0	0	0	0	0	0	0	0	0	0	0	0	0
SEVENTH	environmental_samples	3	1	0	0	0	0	0	0	0	0	0	0	0	NA	0	NA	0	0	0	0	0	0	0	0	0	0	0	0	0	0
SEVENTH	unclassified_Mycolicibacterium	63	57	0	0	0	0	0	0	0	0	0	0	0	NA	0	NA	0	0	0	0	0	0	0	0	0	0	0	0	0	0
FIFTH	Nocardiaceae	1476	624	0	0	0	0	0	0	0	0	0	0	0	NA	0	NA	0	0	0	0	0	0	0	0	0	0	0	0	0	0
SIXTH	Aldersonia	2	2	0	0	0	0	0	0	0	0	0	0	0	NA	0	NA	0	0	0	0	0	0	0	0	0	0	0	0	0	0
SEVENTH	unclassified_Aldersonia	1	1	0	0	0	0	0	0	0	0	0	0	0	NA	0	NA	0	0	0	0	0	0	0	0	0	0	0	0	0	0
SIXTH	Antrihabitans	4	4	0	0	0	0	0	0	0	0	0	0	0	NA	0	NA	0	0	0	0	0	0	0	0	0	0	0	0	0	0
SEVENTH	unclassified_Antrihabitans	1	1	0	0	0	0	0	0	0	0	0	0	0	NA	0	NA	0	0	0	0	0	0	0	0	0	0	0	0	0	0
SIXTH	Nocardia	631	220	0	0	0	0	0	0	0	0	0	0	0	NA	0	NA	0	0	0	0	0	0	0	0	0	0	0	0	0	0
SEVENTH	unclassified_Nocardia	109	106	0	0	0	0	0	0	0	0	0	0	0	NA	0	NA	0	0	0	0	0	0	0	0	0	0	0	0	0	0
SIXTH	Prescottella	86	7	0	0	0	0	0	0	0	0	0	0	0	NA	0	NA	0	0	0	0	0	0	0	0	0	0	0	0	0	0
SEVENTH	unclassified_Prescottella	2	2	0	0	0	0	0	0	0	0	0	0	0	NA	0	NA	0	0	0	0	0	0	0	0	0	0	0	0	0	0
SIXTH	Rhodococcoides	66	6	0	0	0	0	0	0	0	0	0	0	0	NA	0	NA	0	0	0	0	0	0	0	0	0	0	0	0	0	0
SIXTH	Rhodococcus	659	367	0	0	0	0	0	0	0	0	0	0	0	NA	0	NA	0	0	0	0	0	0	0	0	0	0	0	0	0	0
SEVENTH	environmental_samples	2	1	0	0	0	0	0	0	0	0	0	0	0	NA	0	NA	0	0	0	0	0	0	0	0	0	0	0	0	0	0
SEVENTH	unclassified_Rhodococcus_in_high_G_C_Gram_positive_bacteria	345	330	0	0	0	0	0	0	0	0	0	0	0	NA	0	NA	0	0	0	0	0	0	0	0	0	0	0	0	0	0
SIXTH	Smaragdicoccus	2	1	0	0	0	0	0	0	0	0	0	0	0	NA	0	NA	0	0	0	0	0	0	0	0	0	0	0	0	0	0
SIXTH	Williamsia	26	17	0	0	0	0	0	0	0	0	0	0	0	NA	0	NA	0	0	0	0	0	0	0	0	0	0	0	0	0	0
SEVENTH	environmental_samples	1	1	0	0	0	0	0	0	0	0	0	0	0	NA	0	NA	0	0	0	0	0	0	0	0	0	0	0	0	0	0
SEVENTH	unclassified_Williamsia	8	7	0	0	0	0	0	0	0	0	0	0	0	NA	0	NA	0	0	0	0	0	0	0	0	0	0	0	0	0	0
FIFTH	Segniliparaceae	2	2	0	0	0	0	0	0	0	0	0	0	0	NA	0	NA	0	0	0	0	0	0	0	0	0	0	0	0	0	0
SIXTH	Segniliparus	2	2	0	0	0	0	0	0	0	0	0	0	0	NA	0	NA	0	0	0	0	0	0	0	0	0	0	0	0	0	0
FIFTH	Speluncibacteraceae	2	1	0	0	0	0	0	0	0	0	0	0	0	NA	0	NA	0	0	0	0	0	0	0	0	0	0	0	0	0	0
SIXTH	Speluncibacter	2	1	0	0	0	0	0	0	0	0	0	0	0	NA	0	NA	0	0	0	0	0	0	0	0	0	0	0	0	0	0
FIFTH	Tsukamurellaceae	45	20	0	0	0	0	0	0	0	0	0	0	0	NA	0	NA	0	0	0	0	0	0	0	0	0	0	0	0	0	0
SIXTH	Tsukamurella	45	20	0	0	0	0	0	0	0	0	0	0	0	NA	0	NA	0	0	0	0	0	0	0	0	0	0	0	0	0	0
SEVENTH	unclassified_Tsukamurella	8	8	0	0	0	0	0	0	0	0	0	0	0	NA	0	NA	0	0	0	0	0	0	0	0	0	0	0	0	0	0
FORTH	Nakamurellales	16	14	0	0	0	0	0	0	0	0	0	0	0	NA	0	NA	0	0	0	0	0	0	0	0	0	0	0	0	0	0
FIFTH	Nakamurellaceae	16	14	0	0	0	0	0	0	0	0	0	0	0	NA	0	NA	0	0	0	0	0	0	0	0	0	0	0	0	0	0
SIXTH	Nakamurella	16	14	0	0	0	0	0	0	0	0	0	0	0	NA	0	NA	0	0	0	0	0	0	0	0	0	0	0	0	0	0
SEVENTH	unclassified_Nakamurella	3	3	0	0	0	0	0	0	0	0	0	0	0	NA	0	NA	0	0	0	0	0	0	0	0	0	0	0	0	0	0
FORTH	Propionibacteriales	1515	535	0	0	0	0	0	0	0	0	0	0	0	NA	0	NA	0	0	0	0	0	0	0	0	0	0	0	0	0	0
FIFTH	Actinopolymorphaceae	12	9	0	0	0	0	0	0	0	0	0	0	0	NA	0	NA	0	0	0	0	0	0	0	0	0	0	0	0	0	0
SIXTH	Actinopolymorpha	12	9	0	0	0	0	0	0	0	0	0	0	0	NA	0	NA	0	0	0	0	0	0	0	0	0	0	0	0	0	0
SEVENTH	unclassified_Actinopolymorpha	4	4	0	0	0	0	0	0	0	0	0	0	0	NA	0	NA	0	0	0	0	0	0	0	0	0	0	0	0	0	0
FIFTH	Kribbellaceae	86	76	0	0	0	0	0	0	0	0	0	0	0	NA	0	NA	0	0	0	0	0	0	0	0	0	0	0	0	0	0
SIXTH	Kribbella	86	76	0	0	0	0	0	0	0	0	0	0	0	NA	0	NA	0	0	0	0	0	0	0	0	0	0	0	0	0	0
SEVENTH	unclassified_Kribbella	42	41	0	0	0	0	0	0	0	0	0	0	0	NA	0	NA	0	0	0	0	0	0	0	0	0	0	0	0	0	0
FIFTH	Nocardioidaceae	519	335	0	0	0	0	0	0	0	0	0	0	0	NA	0	NA	0	0	0	0	0	0	0	0	0	0	0	0	0	0
SIXTH	Aeromicrobium	94	54	0	0	0	0	0	0	0	0	0	0	0	NA	0	NA	0	0	0	0	0	0	0	0	0	0	0	0	0	0
SEVENTH	environmental_samples	2	1	0	0	0	0	0	0	0	0	0	0	0	NA	0	NA	0	0	0	0	0	0	0	0	0	0	0	0	0	0
SEVENTH	unclassified_Aeromicrobium	53	30	0	0	0	0	0	0	0	0	0	0	0	NA	0	NA	0	0	0	0	0	0	0	0	0	0	0	0	0	0
SIXTH	Friedmanniella	4	2	0	0	0	0	0	0	0	0	0	0	0	NA	0	NA	0	0	0	0	0	0	0	0	0	0	0	0	0	0
SEVENTH	environmental_samples	3	1	0	0	0	0	0	0	0	0	0	0	0	NA	0	NA	0	0	0	0	0	0	0	0	0	0	0	0	0	0
SIXTH	Marmoricola	4	4	0	0	0	0	0	0	0	0	0	0	0	NA	0	NA	0	0	0	0	0	0	0	0	0	0	0	0	0	0
SEVENTH	unclassified_Marmoricola	3	3	0	0	0	0	0	0	0	0	0	0	0	NA	0	NA	0	0	0	0	0	0	0	0	0	0	0	0	0	0
SIXTH	Micropruina	4	3	0	0	0	0	0	0	0	0	0	0	0	NA	0	NA	0	0	0	0	0	0	0	0	0	0	0	0	0	0
SEVENTH	unclassified_Micropruina	2	2	0	0	0	0	0	0	0	0	0	0	0	NA	0	NA	0	0	0	0	0	0	0	0	0	0	0	0	0	0
SIXTH	Mumia	13	11	0	0	0	0	0	0	0	0	0	0	0	NA	0	NA	0	0	0	0	0	0	0	0	0	0	0	0	0	0
SEVENTH	unclassified_Mumia	8	7	0	0	0	0	0	0	0	0	0	0	0	NA	0	NA	0	0	0	0	0	0	0	0	0	0	0	0	0	0
SIXTH	Nocardioides	382	253	0	0	0	0	0	0	0	0	0	0	0	NA	0	NA	0	0	0	0	0	0	0	0	0	0	0	0	0	0
SEVENTH	environmental_samples	18	1	0	0	0	0	0	0	0	0	0	0	0	NA	0	NA	0	0	0	0	0	0	0	0	0	0	0	0	0	0
SEVENTH	unclassified_Nocardioides	155	103	0	0	0	0	0	0	0	0	0	0	0	NA	0	NA	0	0	0	0	0	0	0	0	0	0	0	0	0	0
SIXTH	Pimelobacter	9	2	0	0	0	0	0	0	0	0	0	0	0	NA	0	NA	0	0	0	0	0	0	0	0	0	0	0	0	0	0
SEVENTH	unclassified_Pimelobacter	1	1	0	0	0	0	0	0	0	0	0	0	0	NA	0	NA	0	0	0	0	0	0	0	0	0	0	0	0	0	0
SIXTH	Propionicicella	1	1	0	0	0	0	0	0	0	0	0	0	0	NA	0	NA	0	0	0	0	0	0	0	0	0	0	0	0	0	0
SIXTH	Propionicimonas	5	2	0	0	0	0	0	0	0	0	0	0	0	NA	0	NA	0	0	0	0	0	0	0	0	0	0	0	0	0	0
SEVENTH	unclassified_Propionicimonas	4	1	0	0	0	0	0	0	0	0	0	0	0	NA	0	NA	0	0	0	0	0	0	0	0	0	0	0	0	0	0
SIXTH	Solicola	1	1	0	0	0	0	0	0	0	0	0	0	0	NA	0	NA	0	0	0	0	0	0	0	0	0	0	0	0	0	0
SIXTH	Tenggerimyces	1	1	0	0	0	0	0	0	0	0	0	0	0	NA	0	NA	0	0	0	0	0	0	0	0	0	0	0	0	0	0
SIXTH	Thermasporomyces	1	1	0	0	0	0	0	0	0	0	0	0	0	NA	0	NA	0	0	0	0	0	0	0	0	0	0	0	0	0	0
FIFTH	Propionibacteriaceae	898	115	0	0	0	0	0	0	0	0	0	0	0	NA	0	NA	0	0	0	0	0	0	0	0	0	0	0	0	0	0
SIXTH	Acidipropionibacterium	29	5	0	0	0	0	0	0	0	0	0	0	0	NA	0	NA	0	0	0	0	0	0	0	0	0	0	0	0	0	0
SIXTH	Aestuariimicrobium	4	4	0	0	0	0	0	0	0	0	0	0	0	NA	0	NA	0	0	0	0	0	0	0	0	0	0	0	0	0	0
SEVENTH	unclassified_Aestuariimicrobium	2	2	0	0	0	0	0	0	0	0	0	0	0	NA	0	NA	0	0	0	0	0	0	0	0	0	0	0	0	0	0
SIXTH	Arachnia	21	3	0	0	0	0	0	0	0	0	0	0	0	NA	0	NA	0	0	0	0	0	0	0	0	0	0	0	0	0	0
SIXTH	Auraticoccus	2	2	0	0	0	0	0	0	0	0	0	0	0	NA	0	NA	0	0	0	0	0	0	0	0	0	0	0	0	0	0
SIXTH	Brooklawnia	4	3	0	0	0	0	0	0	0	0	0	0	0	NA	0	NA	0	0	0	0	0	0	0	0	0	0	0	0	0	0
SEVENTH	unclassified_Brooklawnia	1	1	0	0	0	0	0	0	0	0	0	0	0	NA	0	NA	0	0	0	0	0	0	0	0	0	0	0	0	0	0
SIXTH	Cutibacterium	605	11	0	0	0	0	0	0	0	0	0	0	0	NA	0	NA	0	0	0	0	0	0	0	0	0	0	0	0	0	0
SEVENTH	environmental_samples	3	1	0	0	0	0	0	0	0	0	0	0	0	NA	0	NA	0	0	0	0	0	0	0	0	0	0	0	0	0	0
SEVENTH	unclassified_Cutibacterium	9	3	0	0	0	0	0	0	0	0	0	0	0	NA	0	NA	0	0	0	0	0	0	0	0	0	0	0	0	0	0
SIXTH	Desertihabitans	2	2	0	0	0	0	0	0	0	0	0	0	0	NA	0	NA	0	0	0	0	0	0	0	0	0	0	0	0	0	0
SIXTH	Enemella	8	2	0	0	0	0	0	0	0	0	0	0	0	NA	0	NA	0	0	0	0	0	0	0	0	0	0	0	0	0	0
SIXTH	Granulicoccus	2	1	0	0	0	0	0	0	0	0	0	0	0	NA	0	NA	0	0	0	0	0	0	0	0	0	0	0	0	0	0
SIXTH	Luteococcus	9	8	0	0	0	0	0	0	0	0	0	0	0	NA	0	NA	0	0	0	0	0	0	0	0	0	0	0	0	0	0
SEVENTH	unclassified_Luteococcus	5	5	0	0	0	0	0	0	0	0	0	0	0	NA	0	NA	0	0	0	0	0	0	0	0	0	0	0	0	0	0
SIXTH	Microlunatus	18	16	0	0	0	0	0	0	0	0	0	0	0	NA	0	NA	0	0	0	0	0	0	0	0	0	0	0	0	0	0
SEVENTH	unclassified_Microlunatus	1	1	0	0	0	0	0	0	0	0	0	0	0	NA	0	NA	0	0	0	0	0	0	0	0	0	0	0	0	0	0
SIXTH	Naumannella	2	2	0	0	0	0	0	0	0	0	0	0	0	NA	0	NA	0	0	0	0	0	0	0	0	0	0	0	0	0	0
SIXTH	Nigerium	3	2	0	0	0	0	0	0	0	0	0	0	0	NA	0	NA	0	0	0	0	0	0	0	0	0	0	0	0	0	0
SEVENTH	unclassified_Nigerium	1	1	0	0	0	0	0	0	0	0	0	0	0	NA	0	NA	0	0	0	0	0	0	0	0	0	0	0	0	0	0
SIXTH	Parenemella	2	1	0	0	0	0	0	0	0	0	0	0	0	NA	0	NA	0	0	0	0	0	0	0	0	0	0	0	0	0	0
SIXTH	Propionibacterium	120	8	0	0	0	0	0	0	0	0	0	0	0	NA	0	NA	0	0	0	0	0	0	0	0	0	0	0	0	0	0
SEVENTH	environmental_samples	1	1	0	0	0	0	0	0	0	0	0	0	0	NA	0	NA	0	0	0	0	0	0	0	0	0	0	0	0	0	0
SEVENTH	unclassified_Propionibacterium	2	2	0	0	0	0	0	0	0	0	0	0	0	NA	0	NA	0	0	0	0	0	0	0	0	0	0	0	0	0	0
SIXTH	Propioniciclava	15	8	0	0	0	0	0	0	0	0	0	0	0	NA	0	NA	0	0	0	0	0	0	0	0	0	0	0	0	0	0
SEVENTH	unclassified_Propioniciclava	7	3	0	0	0	0	0	0	0	0	0	0	0	NA	0	NA	0	0	0	0	0	0	0	0	0	0	0	0	0	0
SIXTH	Propioniferax	2	1	0	0	0	0	0	0	0	0	0	0	0	NA	0	NA	0	0	0	0	0	0	0	0	0	0	0	0	0	0
SIXTH	Propionimicrobium	8	3	0	0	0	0	0	0	0	0	0	0	0	NA	0	NA	0	0	0	0	0	0	0	0	0	0	0	0	0	0
SEVENTH	unclassified_Propionimicrobium	2	2	0	0	0	0	0	0	0	0	0	0	0	NA	0	NA	0	0	0	0	0	0	0	0	0	0	0	0	0	0
SIXTH	Raineyella	5	5	0	0	0	0	0	0	0	0	0	0	0	NA	0	NA	0	0	0	0	0	0	0	0	0	0	0	0	0	0
SEVENTH	unclassified_Raineyella	3	3	0	0	0	0	0	0	0	0	0	0	0	NA	0	NA	0	0	0	0	0	0	0	0	0	0	0	0	0	0
SIXTH	Tessaracoccus	36	27	0	0	0	0	0	0	0	0	0	0	0	NA	0	NA	0	0	0	0	0	0	0	0	0	0	0	0	0	0
SEVENTH	environmental_samples	3	1	0	0	0	0	0	0	0	0	0	0	0	NA	0	NA	0	0	0	0	0	0	0	0	0	0	0	0	0	0
SEVENTH	unclassified_Tessaracoccus	12	10	0	0	0	0	0	0	0	0	0	0	0	NA	0	NA	0	0	0	0	0	0	0	0	0	0	0	0	0	0
SIXTH	Vaginimicrobium	1	1	0	0	0	0	0	0	0	0	0	0	0	NA	0	NA	0	0	0	0	0	0	0	0	0	0	0	0	0	0
FORTH	Pseudonocardiales	724	534	0	0	0	0	0	0	0	0	0	0	0	NA	0	NA	0	0	0	0	0	0	0	0	0	0	0	0	0	0
FIFTH	Pseudonocardiaceae	724	534	0	0	0	0	0	0	0	0	0	0	0	NA	0	NA	0	0	0	0	0	0	0	0	0	0	0	0	0	0
SIXTH	Actinoalloteichus	11	7	0	0	0	0	0	0	0	0	0	0	0	NA	0	NA	0	0	0	0	0	0	0	0	0	0	0	0	0	0
SEVENTH	unclassified_Actinoalloteichus	2	2	0	0	0	0	0	0	0	0	0	0	0	NA	0	NA	0	0	0	0	0	0	0	0	0	0	0	0	0	0
SIXTH	Actinocrispum	2	2	0	0	0	0	0	0	0	0	0	0	0	NA	0	NA	0	0	0	0	0	0	0	0	0	0	0	0	0	0
SEVENTH	unclassified_Actinocrispum	1	1	0	0	0	0	0	0	0	0	0	0	0	NA	0	NA	0	0	0	0	0	0	0	0	0	0	0	0	0	0
SIXTH	Actinokineospora	27	18	0	0	0	0	0	0	0	0	0	0	0	NA	0	NA	0	0	0	0	0	0	0	0	0	0	0	0	0	0
SEVENTH	unclassified_Actinokineospora	3	3	0	0	0	0	0	0	0	0	0	0	0	NA	0	NA	0	0	0	0	0	0	0	0	0	0	0	0	0	0
SIXTH	Actinomycetospora	26	21	0	0	0	0	0	0	0	0	0	0	0	NA	0	NA	0	0	0	0	0	0	0	0	0	0	0	0	0	0
SEVENTH	unclassified_Actinomycetospora	6	5	0	0	0	0	0	0	0	0	0	0	0	NA	0	NA	0	0	0	0	0	0	0	0	0	0	0	0	0	0
SIXTH	Actinophytocola	15	6	0	0	0	0	0	0	0	0	0	0	0	NA	0	NA	0	0	0	0	0	0	0	0	0	0	0	0	0	0
SEVENTH	unclassified_Actinophytocola	9	1	0	0	0	0	0	0	0	0	0	0	0	NA	0	NA	0	0	0	0	0	0	0	0	0	0	0	0	0	0
SIXTH	Actinosynnema	12	9	0	0	0	0	0	0	0	0	0	0	0	NA	0	NA	0	0	0	0	0	0	0	0	0	0	0	0	0	0
SEVENTH	unclassified_Actinosynnema	7	7	0	0	0	0	0	0	0	0	0	0	0	NA	0	NA	0	0	0	0	0	0	0	0	0	0	0	0	0	0
SIXTH	Alloactinosynnema	1	1	0	0	0	0	0	0	0	0	0	0	0	NA	0	NA	0	0	0	0	0	0	0	0	0	0	0	0	0	0
SEVENTH	unclassified_Alloactinosynnema	1	1	0	0	0	0	0	0	0	0	0	0	0	NA	0	NA	0	0	0	0	0	0	0	0	0	0	0	0	0	0
SIXTH	Allokutzneria	5	4	0	0	0	0	0	0	0	0	0	0	0	NA	0	NA	0	0	0	0	0	0	0	0	0	0	0	0	0	0
SEVENTH	unclassified_Allokutzneria	2	2	0	0	0	0	0	0	0	0	0	0	0	NA	0	NA	0	0	0	0	0	0	0	0	0	0	0	0	0	0
SIXTH	Allosaccharopolyspora	1	1	0	0	0	0	0	0	0	0	0	0	0	NA	0	NA	0	0	0	0	0	0	0	0	0	0	0	0	0	0
SIXTH	Amycolatopsis	229	172	0	0	0	0	0	0	0	0	0	0	0	NA	0	NA	0	0	0	0	0	0	0	0	0	0	0	0	0	0
SEVENTH	unclassified_Amycolatopsis	99	92	0	0	0	0	0	0	0	0	0	0	0	NA	0	NA	0	0	0	0	0	0	0	0	0	0	0	0	0	0
SIXTH	Crossiella	8	6	0	0	0	0	0	0	0	0	0	0	0	NA	0	NA	0	0	0	0	0	0	0	0	0	0	0	0	0	0
SEVENTH	unclassified_Crossiella	4	4	0	0	0	0	0	0	0	0	0	0	0	NA	0	NA	0	0	0	0	0	0	0	0	0	0	0	0	0	0
SIXTH	Gandjariella	1	1	0	0	0	0	0	0	0	0	0	0	0	NA	0	NA	0	0	0	0	0	0	0	0	0	0	0	0	0	0
SIXTH	Goodfellowiella	1	1	0	0	0	0	0	0	0	0	0	0	0	NA	0	NA	0	0	0	0	0	0	0	0	0	0	0	0	0	0
SIXTH	Haloechinothrix	5	5	0	0	0	0	0	0	0	0	0	0	0	NA	0	NA	0	0	0	0	0	0	0	0	0	0	0	0	0	0
SEVENTH	unclassified_Haloechinothrix	1	1	0	0	0	0	0	0	0	0	0	0	0	NA	0	NA	0	0	0	0	0	0	0	0	0	0	0	0	0	0
SIXTH	Halosaccharopolyspora	1	1	0	0	0	0	0	0	0	0	0	0	0	NA	0	NA	0	0	0	0	0	0	0	0	0	0	0	0	0	0
SIXTH	Herbihabitans	1	1	0	0	0	0	0	0	0	0	0	0	0	NA	0	NA	0	0	0	0	0	0	0	0	0	0	0	0	0	0
SIXTH	Kibdelosporangium	8	6	0	0	0	0	0	0	0	0	0	0	0	NA	0	NA	0	0	0	0	0	0	0	0	0	0	0	0	0	0
SEVENTH	unclassified_Kibdelosporangium	1	1	0	0	0	0	0	0	0	0	0	0	0	NA	0	NA	0	0	0	0	0	0	0	0	0	0	0	0	0	0
SIXTH	Kutzneria	10	8	0	0	0	0	0	0	0	0	0	0	0	NA	0	NA	0	0	0	0	0	0	0	0	0	0	0	0	0	0
SEVENTH	unclassified_Kutzneria	3	3	0	0	0	0	0	0	0	0	0	0	0	NA	0	NA	0	0	0	0	0	0	0	0	0	0	0	0	0	0
SIXTH	Labedaea	1	1	0	0	0	0	0	0	0	0	0	0	0	NA	0	NA	0	0	0	0	0	0	0	0	0	0	0	0	0	0
SIXTH	Lentzea	49	40	0	0	0	0	0	0	0	0	0	0	0	NA	0	NA	0	0	0	0	0	0	0	0	0	0	0	0	0	0
SEVENTH	unclassified_Lentzea	17	16	0	0	0	0	0	0	0	0	0	0	0	NA	0	NA	0	0	0	0	0	0	0	0	0	0	0	0	0	0
SIXTH	Longimycelium	1	1	0	0	0	0	0	0	0	0	0	0	0	NA	0	NA	0	0	0	0	0	0	0	0	0	0	0	0	0	0
SIXTH	Prauserella	21	15	0	0	0	0	0	0	0	0	0	0	0	NA	0	NA	0	0	0	0	0	0	0	0	0	0	0	0	0	0
SEVENTH	unclassified_Prauserella	1	1	0	0	0	0	0	0	0	0	0	0	0	NA	0	NA	0	0	0	0	0	0	0	0	0	0	0	0	0	0
SIXTH	Pseudonocardia	131	95	0	0	0	0	0	0	0	0	0	0	0	NA	0	NA	0	0	0	0	0	0	0	0	0	0	0	0	0	0
SEVENTH	environmental_samples	1	1	0	0	0	0	0	0	0	0	0	0	0	NA	0	NA	0	0	0	0	0	0	0	0	0	0	0	0	0	0
SEVENTH	unclassified_Pseudonocardia	57	47	0	0	0	0	0	0	0	0	0	0	0	NA	0	NA	0	0	0	0	0	0	0	0	0	0	0	0	0	0
SIXTH	Qaidamihabitans	1	1	0	0	0	0	0	0	0	0	0	0	0	NA	0	NA	0	0	0	0	0	0	0	0	0	0	0	0	0	0
SIXTH	Saccharomonospora	28	15	0	0	0	0	0	0	0	0	0	0	0	NA	0	NA	0	0	0	0	0	0	0	0	0	0	0	0	0	0
SEVENTH	unclassified_Saccharomonospora	4	4	0	0	0	0	0	0	0	0	0	0	0	NA	0	NA	0	0	0	0	0	0	0	0	0	0	0	0	0	0
SIXTH	Saccharopolyspora	75	49	0	0	0	0	0	0	0	0	0	0	0	NA	0	NA	0	0	0	0	0	0	0	0	0	0	0	0	0	0
SEVENTH	unclassified_Saccharopolyspora	17	17	0	0	0	0	0	0	0	0	0	0	0	NA	0	NA	0	0	0	0	0	0	0	0	0	0	0	0	0	0
SIXTH	Saccharothrix	39	33	0	0	0	0	0	0	0	0	0	0	0	NA	0	NA	0	0	0	0	0	0	0	0	0	0	0	0	0	0
SEVENTH	unclassified_Saccharothrix	14	14	0	0	0	0	0	0	0	0	0	0	0	NA	0	NA	0	0	0	0	0	0	0	0	0	0	0	0	0	0
SIXTH	Sciscionella	2	2	0	0	0	0	0	0	0	0	0	0	0	NA	0	NA	0	0	0	0	0	0	0	0	0	0	0	0	0	0
SIXTH	Solihabitans	1	1	0	0	0	0	0	0	0	0	0	0	0	NA	0	NA	0	0	0	0	0	0	0	0	0	0	0	0	0	0
SIXTH	Streptoalloteichus	2	2	0	0	0	0	0	0	0	0	0	0	0	NA	0	NA	0	0	0	0	0	0	0	0	0	0	0	0	0	0
SIXTH	Tamaricihabitans	1	1	0	0	0	0	0	0	0	0	0	0	0	NA	0	NA	0	0	0	0	0	0	0	0	0	0	0	0	0	0
SIXTH	Thermocrispum	3	3	0	0	0	0	0	0	0	0	0	0	0	NA	0	NA	0	0	0	0	0	0	0	0	0	0	0	0	0	0
SEVENTH	unclassified_Thermocrispum	1	1	0	0	0	0	0	0	0	0	0	0	0	NA	0	NA	0	0	0	0	0	0	0	0	0	0	0	0	0	0
SIXTH	Umezawaea	5	5	0	0	0	0	0	0	0	0	0	0	0	NA	0	NA	0	0	0	0	0	0	0	0	0	0	0	0	0	0
SEVENTH	unclassified_Umezawaea	2	2	0	0	0	0	0	0	0	0	0	0	0	NA	0	NA	0	0	0	0	0	0	0	0	0	0	0	0	0	0
FORTH	Sporichthyales	4	4	0	0	0	0	0	0	0	0	0	0	0	NA	0	NA	0	0	0	0	0	0	0	0	0	0	0	0	0	0
FIFTH	Sporichthyaceae	4	4	0	0	0	0	0	0	0	0	0	0	0	NA	0	NA	0	0	0	0	0	0	0	0	0	0	0	0	0	0
SIXTH	Epidermidibacterium	1	1	0	0	0	0	0	0	0	0	0	0	0	NA	0	NA	0	0	0	0	0	0	0	0	0	0	0	0	0	0
SIXTH	Sporichthya	3	3	0	0	0	0	0	0	0	0	0	0	0	NA	0	NA	0	0	0	0	0	0	0	0	0	0	0	0	0	0
SEVENTH	unclassified_Sporichthya	1	1	0	0	0	0	0	0	0	0	0	0	0	NA	0	NA	0	0	0	0	0	0	0	0	0	0	0	0	0	0
FORTH	Streptosporangiales	736	532	0	0	0	0	0	0	0	0	0	0	0	NA	0	NA	0	0	0	0	0	0	0	0	0	0	0	0	0	0
FIFTH	Nocardiopsaceae	156	99	0	0	0	0	0	0	0	0	0	0	0	NA	0	NA	0	0	0	0	0	0	0	0	0	0	0	0	0	0
SIXTH	Actinorugispora	1	1	0	0	0	0	0	0	0	0	0	0	0	NA	0	NA	0	0	0	0	0	0	0	0	0	0	0	0	0	0
SIXTH	Allosalinactinospora	1	1	0	0	0	0	0	0	0	0	0	0	0	NA	0	NA	0	0	0	0	0	0	0	0	0	0	0	0	0	0
SIXTH	Haloactinospora	1	1	0	0	0	0	0	0	0	0	0	0	0	NA	0	NA	0	0	0	0	0	0	0	0	0	0	0	0	0	0
SIXTH	Lipingzhangella	2	2	0	0	0	0	0	0	0	0	0	0	0	NA	0	NA	0	0	0	0	0	0	0	0	0	0	0	0	0	0
SIXTH	Marinactinospora	1	1	0	0	0	0	0	0	0	0	0	0	0	NA	0	NA	0	0	0	0	0	0	0	0	0	0	0	0	0	0
SIXTH	Marinitenerispora	3	1	0	0	0	0	0	0	0	0	0	0	0	NA	0	NA	0	0	0	0	0	0	0	0	0	0	0	0	0	0
SIXTH	Murinocardiopsis	1	1	0	0	0	0	0	0	0	0	0	0	0	NA	0	NA	0	0	0	0	0	0	0	0	0	0	0	0	0	0
SIXTH	Nocardiopsis	115	74	0	0	0	0	0	0	0	0	0	0	0	NA	0	NA	0	0	0	0	0	0	0	0	0	0	0	0	0	0
SEVENTH	unclassified_Nocardiopsis	34	34	0	0	0	0	0	0	0	0	0	0	0	NA	0	NA	0	0	0	0	0	0	0	0	0	0	0	0	0	0
SIXTH	Salinactinospora	1	1	0	0	0	0	0	0	0	0	0	0	0	NA	0	NA	0	0	0	0	0	0	0	0	0	0	0	0	0	0
SIXTH	Spinactinospora	2	1	0	0	0	0	0	0	0	0	0	0	0	NA	0	NA	0	0	0	0	0	0	0	0	0	0	0	0	0	0
SIXTH	Spiractinospora	1	1	0	0	0	0	0	0	0	0	0	0	0	NA	0	NA	0	0	0	0	0	0	0	0	0	0	0	0	0	0
SIXTH	Streptomonospora	12	9	0	0	0	0	0	0	0	0	0	0	0	NA	0	NA	0	0	0	0	0	0	0	0	0	0	0	0	0	0
SEVENTH	unclassified_Streptomonospora	2	2	0	0	0	0	0	0	0	0	0	0	0	NA	0	NA	0	0	0	0	0	0	0	0	0	0	0	0	0	0
SIXTH	Thermobifida	15	5	0	0	0	0	0	0	0	0	0	0	0	NA	0	NA	0	0	0	0	0	0	0	0	0	0	0	0	0	0
SEVENTH	unclassified_Thermobifida	1	1	0	0	0	0	0	0	0	0	0	0	0	NA	0	NA	0	0	0	0	0	0	0	0	0	0	0	0	0	0
FIFTH	Streptosporangiaceae	408	293	0	0	0	0	0	0	0	0	0	0	0	NA	0	NA	0	0	0	0	0	0	0	0	0	0	0	0	0	0
SIXTH	Acrocarpospora	9	6	0	0	0	0	0	0	0	0	0	0	0	NA	0	NA	0	0	0	0	0	0	0	0	0	0	0	0	0	0
SEVENTH	unclassified_Acrocarpospora	1	1	0	0	0	0	0	0	0	0	0	0	0	NA	0	NA	0	0	0	0	0	0	0	0	0	0	0	0	0	0
SIXTH	Bailinhaonella	1	1	0	0	0	0	0	0	0	0	0	0	0	NA	0	NA	0	0	0	0	0	0	0	0	0	0	0	0	0	0
SIXTH	Herbidospora	9	8	0	0	0	0	0	0	0	0	0	0	0	NA	0	NA	0	0	0	0	0	0	0	0	0	0	0	0	0	0
SEVENTH	unclassified_Herbidospora	1	1	0	0	0	0	0	0	0	0	0	0	0	NA	0	NA	0	0	0	0	0	0	0	0	0	0	0	0	0	0
SIXTH	Microbispora	60	36	0	0	0	0	0	0	0	0	0	0	0	NA	0	NA	0	0	0	0	0	0	0	0	0	0	0	0	0	0
SEVENTH	unclassified_Microbispora	22	22	0	0	0	0	0	0	0	0	0	0	0	NA	0	NA	0	0	0	0	0	0	0	0	0	0	0	0	0	0
SIXTH	Microtetraspora	7	7	0	0	0	0	0	0	0	0	0	0	0	NA	0	NA	0	0	0	0	0	0	0	0	0	0	0	0	0	0
SEVENTH	unclassified_Microtetraspora	3	3	0	0	0	0	0	0	0	0	0	0	0	NA	0	NA	0	0	0	0	0	0	0	0	0	0	0	0	0	0
SIXTH	Nonomuraea	187	139	0	0	0	0	0	0	0	0	0	0	0	NA	0	NA	0	0	0	0	0	0	0	0	0	0	0	0	0	0
SEVENTH	unclassified_Nonomuraea	79	79	0	0	0	0	0	0	0	0	0	0	0	NA	0	NA	0	0	0	0	0	0	0	0	0	0	0	0	0	0
SIXTH	Planobispora	6	4	0	0	0	0	0	0	0	0	0	0	0	NA	0	NA	0	0	0	0	0	0	0	0	0	0	0	0	0	0
SIXTH	Planomonospora	11	7	0	0	0	0	0	0	0	0	0	0	0	NA	0	NA	0	0	0	0	0	0	0	0	0	0	0	0	0	0
SEVENTH	unclassified_Planomonospora	3	3	0	0	0	0	0	0	0	0	0	0	0	NA	0	NA	0	0	0	0	0	0	0	0	0	0	0	0	0	0
SIXTH	Planotetraspora	10	7	0	0	0	0	0	0	0	0	0	0	0	NA	0	NA	0	0	0	0	0	0	0	0	0	0	0	0	0	0
SEVENTH	unclassified_Planotetraspora	2	2	0	0	0	0	0	0	0	0	0	0	0	NA	0	NA	0	0	0	0	0	0	0	0	0	0	0	0	0	0
SIXTH	Rhizohabitans	1	1	0	0	0	0	0	0	0	0	0	0	0	NA	0	NA	0	0	0	0	0	0	0	0	0	0	0	0	0	0
SIXTH	Sinosporangium	2	2	0	0	0	0	0	0	0	0	0	0	0	NA	0	NA	0	0	0	0	0	0	0	0	0	0	0	0	0	0
SIXTH	Sphaerimonospora	1	1	0	0	0	0	0	0	0	0	0	0	0	NA	0	NA	0	0	0	0	0	0	0	0	0	0	0	0	0	0
SIXTH	Sphaerisporangium	22	18	0	0	0	0	0	0	0	0	0	0	0	NA	0	NA	0	0	0	0	0	0	0	0	0	0	0	0	0	0
SEVENTH	unclassified_Sphaerisporangium	8	8	0	0	0	0	0	0	0	0	0	0	0	NA	0	NA	0	0	0	0	0	0	0	0	0	0	0	0	0	0
SIXTH	Spongiactinospora	3	3	0	0	0	0	0	0	0	0	0	0	0	NA	0	NA	0	0	0	0	0	0	0	0	0	0	0	0	0	0
SEVENTH	unclassified_Spongiactinospora	1	1	0	0	0	0	0	0	0	0	0	0	0	NA	0	NA	0	0	0	0	0	0	0	0	0	0	0	0	0	0
SIXTH	Streptosporangium	70	48	0	0	0	0	0	0	0	0	0	0	0	NA	0	NA	0	0	0	0	0	0	0	0	0	0	0	0	0	0
SEVENTH	unclassified_Streptosporangium	30	30	0	0	0	0	0	0	0	0	0	0	0	NA	0	NA	0	0	0	0	0	0	0	0	0	0	0	0	0	0
SIXTH	Thermoactinospora	1	1	0	0	0	0	0	0	0	0	0	0	0	NA	0	NA	0	0	0	0	0	0	0	0	0	0	0	0	0	0
SIXTH	Thermobispora	3	1	0	0	0	0	0	0	0	0	0	0	0	NA	0	NA	0	0	0	0	0	0	0	0	0	0	0	0	0	0
SIXTH	Thermocatellispora	2	1	0	0	0	0	0	0	0	0	0	0	0	NA	0	NA	0	0	0	0	0	0	0	0	0	0	0	0	0	0
SIXTH	Thermopolyspora	3	2	0	0	0	0	0	0	0	0	0	0	0	NA	0	NA	0	0	0	0	0	0	0	0	0	0	0	0	0	0
SEVENTH	unclassified_Thermopolyspora	1	1	0	0	0	0	0	0	0	0	0	0	0	NA	0	NA	0	0	0	0	0	0	0	0	0	0	0	0	0	0
FIFTH	Streptosporangiales_incertae_sedis	1	1	0	0	0	0	0	0	0	0	0	0	0	NA	0	NA	0	0	0	0	0	0	0	0	0	0	0	0	0	0
SIXTH	Allonocardiopsis	1	1	0	0	0	0	0	0	0	0	0	0	0	NA	0	NA	0	0	0	0	0	0	0	0	0	0	0	0	0	0
FIFTH	Thermomonosporaceae	169	137	0	0	0	0	0	0	0	0	0	0	0	NA	0	NA	0	0	0	0	0	0	0	0	0	0	0	0	0	0
SIXTH	Actinoallomurus	15	13	0	0	0	0	0	0	0	0	0	0	0	NA	0	NA	0	0	0	0	0	0	0	0	0	0	0	0	0	0
SEVENTH	unclassified_Actinoallomurus	4	4	0	0	0	0	0	0	0	0	0	0	0	NA	0	NA	0	0	0	0	0	0	0	0	0	0	0	0	0	0
SIXTH	Actinocorallia	10	10	0	0	0	0	0	0	0	0	0	0	0	NA	0	NA	0	0	0	0	0	0	0	0	0	0	0	0	0	0
SEVENTH	unclassified_Actinocorallia	3	3	0	0	0	0	0	0	0	0	0	0	0	NA	0	NA	0	0	0	0	0	0	0	0	0	0	0	0	0	0
SIXTH	Actinomadura	130	100	0	0	0	0	0	0	0	0	0	0	0	NA	0	NA	0	0	0	0	0	0	0	0	0	0	0	0	0	0
SEVENTH	unclassified_Actinomadura	37	37	0	0	0	0	0	0	0	0	0	0	0	NA	0	NA	0	0	0	0	0	0	0	0	0	0	0	0	0	0
SIXTH	Spirillospora	5	5	0	0	0	0	0	0	0	0	0	0	0	NA	0	NA	0	0	0	0	0	0	0	0	0	0	0	0	0	0
SEVENTH	unclassified_Spirillospora	4	4	0	0	0	0	0	0	0	0	0	0	0	NA	0	NA	0	0	0	0	0	0	0	0	0	0	0	0	0	0
SIXTH	Thermomonospora	8	8	0	0	0	0	0	0	0	0	0	0	0	NA	0	NA	0	0	0	0	0	0	0	0	0	0	0	0	0	0
SEVENTH	environmental_samples	1	1	0	0	0	0	0	0	0	0	0	0	0	NA	0	NA	0	0	0	0	0	0	0	0	0	0	0	0	0	0
SEVENTH	unclassified_Thermomonospora	1	1	0	0	0	0	0	0	0	0	0	0	0	NA	0	NA	0	0	0	0	0	0	0	0	0	0	0	0	0	0
SIXTH	Thermostaphylospora	1	1	0	0	0	0	0	0	0	0	0	0	0	NA	0	NA	0	0	0	0	0	0	0	0	0	0	0	0	0	0
FIFTH	Treboniaceae	2	2	0	0	0	0	0	0	0	0	0	0	0	NA	0	NA	0	0	0	0	0	0	0	0	0	0	0	0	0	0
SIXTH	Trebonia	2	2	0	0	0	0	0	0	0	0	0	0	0	NA	0	NA	0	0	0	0	0	0	0	0	0	0	0	0	0	0
SEVENTH	unclassified_Trebonia	1	1	0	0	0	0	0	0	0	0	0	0	0	NA	0	NA	0	0	0	0	0	0	0	0	0	0	0	0	0	0
THIRD	Actinomycetota_incertae_sedis	7	1	0	0	0	0	0	0	0	0	0	0	0	NA	0	NA	0	0	0	0	0	0	0	0	0	0	0	0	0	0
FORTH	Candidatus_Hakubellales	7	1	0	0	0	0	0	0	0	0	0	0	0	NA	0	NA	0	0	0	0	0	0	0	0	0	0	0	0	0	0
FIFTH	Candidatus_Hakubellaceae	7	1	0	0	0	0	0	0	0	0	0	0	0	NA	0	NA	0	0	0	0	0	0	0	0	0	0	0	0	0	0
SIXTH	Candidatus_Hakubella	7	1	0	0	0	0	0	0	0	0	0	0	0	NA	0	NA	0	0	0	0	0	0	0	0	0	0	0	0	0	0
THIRD	Candidatus_Aquicultoria	5	2	0	0	0	0	0	0	0	0	0	0	0	NA	0	NA	0	0	0	0	0	0	0	0	0	0	0	0	0	0
FORTH	Candidatus_Aquicultorales	4	1	0	0	0	0	0	0	0	0	0	0	0	NA	0	NA	0	0	0	0	0	0	0	0	0	0	0	0	0	0
FIFTH	Candidatus_Aquicultoraceae	4	1	0	0	0	0	0	0	0	0	0	0	0	NA	0	NA	0	0	0	0	0	0	0	0	0	0	0	0	0	0
SIXTH	Candidatus_Aquicultor	4	1	0	0	0	0	0	0	0	0	0	0	0	NA	0	NA	0	0	0	0	0	0	0	0	0	0	0	0	0	0
FORTH	Candidatus_Subteraquimicrobiales	1	1	0	0	0	0	0	0	0	0	0	0	0	NA	0	NA	0	0	0	0	0	0	0	0	0	0	0	0	0	0
FIFTH	Candidatus_Oleimmundimicrobiaceae	1	1	0	0	0	0	0	0	0	0	0	0	0	NA	0	NA	0	0	0	0	0	0	0	0	0	0	0	0	0	0
SIXTH	Candidatus_Oleimmundimicrobium	1	1	0	0	0	0	0	0	0	0	0	0	0	NA	0	NA	0	0	0	0	0	0	0	0	0	0	0	0	0	0
SEVENTH	unclassified_Candidatus_Oleimmundimicrobium	1	1	0	0	0	0	0	0	0	0	0	0	0	NA	0	NA	0	0	0	0	0	0	0	0	0	0	0	0	0	0
THIRD	Candidatus_Geothermincolia	1	1	0	0	0	0	0	0	0	0	0	0	0	NA	0	NA	0	0	0	0	0	0	0	0	0	0	0	0	0	0
FORTH	Candidatus_Geothermincolales	1	1	0	0	0	0	0	0	0	0	0	0	0	NA	0	NA	0	0	0	0	0	0	0	0	0	0	0	0	0	0
FIFTH	Candidatus_Geothermincolaceae	1	1	0	0	0	0	0	0	0	0	0	0	0	NA	0	NA	0	0	0	0	0	0	0	0	0	0	0	0	0	0
SIXTH	Candidatus_Solincola	1	1	0	0	0	0	0	0	0	0	0	0	0	NA	0	NA	0	0	0	0	0	0	0	0	0	0	0	0	0	0
THIRD	Coriobacteriia	1120	299	0	0	0	0	0	0	0	0	0	0	0	NA	0	NA	0	0	0	0	0	0	0	0	0	0	0	0	0	0
FORTH	Anaerosomatales	2	2	0	0	0	0	0	0	0	0	0	0	0	NA	0	NA	0	0	0	0	0	0	0	0	0	0	0	0	0	0
FIFTH	Anaerosomataceae	2	2	0	0	0	0	0	0	0	0	0	0	0	NA	0	NA	0	0	0	0	0	0	0	0	0	0	0	0	0	0
SIXTH	Anaerosoma	1	1	0	0	0	0	0	0	0	0	0	0	0	NA	0	NA	0	0	0	0	0	0	0	0	0	0	0	0	0	0
SIXTH	Parvivirga	1	1	0	0	0	0	0	0	0	0	0	0	0	NA	0	NA	0	0	0	0	0	0	0	0	0	0	0	0	0	0
FORTH	Coriobacteriales	737	216	0	0	0	0	0	0	0	0	0	0	0	NA	0	NA	0	0	0	0	0	0	0	0	0	0	0	0	0	0
FIFTH	Atopobiaceae	191	68	0	0	0	0	0	0	0	0	0	0	0	NA	0	NA	0	0	0	0	0	0	0	0	0	0	0	0	0	0
SIXTH	Atopobium	19	11	0	0	0	0	0	0	0	0	0	0	0	NA	0	NA	0	0	0	0	0	0	0	0	0	0	0	0	0	0
SEVENTH	environmental_samples	1	1	0	0	0	0	0	0	0	0	0	0	0	NA	0	NA	0	0	0	0	0	0	0	0	0	0	0	0	0	0
SEVENTH	unclassified_Atopobium	8	7	0	0	0	0	0	0	0	0	0	0	0	NA	0	NA	0	0	0	0	0	0	0	0	0	0	0	0	0	0
SIXTH	Caniella	1	1	0	0	0	0	0	0	0	0	0	0	0	NA	0	NA	0	0	0	0	0	0	0	0	0	0	0	0	0	0
SIXTH	Fannyhessea	17	1	0	0	0	0	0	0	0	0	0	0	0	NA	0	NA	0	0	0	0	0	0	0	0	0	0	0	0	0	0
SIXTH	Lancefieldella	21	3	0	0	0	0	0	0	0	0	0	0	0	NA	0	NA	0	0	0	0	0	0	0	0	0	0	0	0	0	0
SEVENTH	unclassified_Lancefieldella	1	1	0	0	0	0	0	0	0	0	0	0	0	NA	0	NA	0	0	0	0	0	0	0	0	0	0	0	0	0	0
SIXTH	Muricaecibacterium	1	1	0	0	0	0	0	0	0	0	0	0	0	NA	0	NA	0	0	0	0	0	0	0	0	0	0	0	0	0	0
SIXTH	Olsenella	52	36	0	0	0	0	0	0	0	0	0	0	0	NA	0	NA	0	0	0	0	0	0	0	0	0	0	0	0	0	0
SEVENTH	environmental_samples	2	1	0	0	0	0	0	0	0	0	0	0	0	NA	0	NA	0	0	0	0	0	0	0	0	0	0	0	0	0	0
SEVENTH	unclassified_Olsenella	27	27	0	0	0	0	0	0	0	0	0	0	0	NA	0	NA	0	0	0	0	0	0	0	0	0	0	0	0	0	0
SIXTH	Parafannyhessea	17	1	0	0	0	0	0	0	0	0	0	0	0	NA	0	NA	0	0	0	0	0	0	0	0	0	0	0	0	0	0
SIXTH	Paratractidigestivibacter	15	2	0	0	0	0	0	0	0	0	0	0	0	NA	0	NA	0	0	0	0	0	0	0	0	0	0	0	0	0	0
SEVENTH	unclassified_Paratractidigestivibacter	11	1	0	0	0	0	0	0	0	0	0	0	0	NA	0	NA	0	0	0	0	0	0	0	0	0	0	0	0	0	0
SIXTH	Parolsenella	32	4	0	0	0	0	0	0	0	0	0	0	0	NA	0	NA	0	0	0	0	0	0	0	0	0	0	0	0	0	0
SEVENTH	environmental_samples	15	1	0	0	0	0	0	0	0	0	0	0	0	NA	0	NA	0	0	0	0	0	0	0	0	0	0	0	0	0	0
SEVENTH	unclassified_Parolsenella	2	1	0	0	0	0	0	0	0	0	0	0	0	NA	0	NA	0	0	0	0	0	0	0	0	0	0	0	0	0	0
SIXTH	Thermophilibacter	11	5	0	0	0	0	0	0	0	0	0	0	0	NA	0	NA	0	0	0	0	0	0	0	0	0	0	0	0	0	0
SEVENTH	unclassified_Thermophilibacter	1	1	0	0	0	0	0	0	0	0	0	0	0	NA	0	NA	0	0	0	0	0	0	0	0	0	0	0	0	0	0
SIXTH	Tractidigestivibacter	5	3	0	0	0	0	0	0	0	0	0	0	0	NA	0	NA	0	0	0	0	0	0	0	0	0	0	0	0	0	0
SEVENTH	unclassified_Tractidigestivibacter	2	1	0	0	0	0	0	0	0	0	0	0	0	NA	0	NA	0	0	0	0	0	0	0	0	0	0	0	0	0	0
FIFTH	Coriobacteriaceae	540	145	0	0	0	0	0	0	0	0	0	0	0	NA	0	NA	0	0	0	0	0	0	0	0	0	0	0	0	0	0
SIXTH	Collinsella	455	129	0	0	0	0	0	0	0	0	0	0	0	NA	0	NA	0	0	0	0	0	0	0	0	0	0	0	0	0	0
SEVENTH	environmental_samples	4	1	0	0	0	0	0	0	0	0	0	0	0	NA	0	NA	0	0	0	0	0	0	0	0	0	0	0	0	0	0
SEVENTH	unclassified_Collinsella	116	116	0	0	0	0	0	0	0	0	0	0	0	NA	0	NA	0	0	0	0	0	0	0	0	0	0	0	0	0	0
SIXTH	Coriobacterium	1	1	0	0	0	0	0	0	0	0	0	0	0	NA	0	NA	0	0	0	0	0	0	0	0	0	0	0	0	0	0
SIXTH	Enorma	32	8	0	0	0	0	0	0	0	0	0	0	0	NA	0	NA	0	0	0	0	0	0	0	0	0	0	0	0	0	0
SEVENTH	environmental_samples	7	1	0	0	0	0	0	0	0	0	0	0	0	NA	0	NA	0	0	0	0	0	0	0	0	0	0	0	0	0	0
SEVENTH	unclassified_Enorma	3	1	0	0	0	0	0	0	0	0	0	0	0	NA	0	NA	0	0	0	0	0	0	0	0	0	0	0	0	0	0
SIXTH	Olegusella	5	2	0	0	0	0	0	0	0	0	0	0	0	NA	0	NA	0	0	0	0	0	0	0	0	0	0	0	0	0	0
SEVENTH	environmental_samples	1	1	0	0	0	0	0	0	0	0	0	0	0	NA	0	NA	0	0	0	0	0	0	0	0	0	0	0	0	0	0
SIXTH	Parvibacter	10	1	0	0	0	0	0	0	0	0	0	0	0	NA	0	NA	0	0	0	0	0	0	0	0	0	0	0	0	0	0
SIXTH	Senegalimassilia	37	4	0	0	0	0	0	0	0	0	0	0	0	NA	0	NA	0	0	0	0	0	0	0	0	0	0	0	0	0	0
SEVENTH	environmental_samples	18	1	0	0	0	0	0	0	0	0	0	0	0	NA	0	NA	0	0	0	0	0	0	0	0	0	0	0	0	0	0
SEVENTH	unclassified_Senegalimassilia	2	1	0	0	0	0	0	0	0	0	0	0	0	NA	0	NA	0	0	0	0	0	0	0	0	0	0	0	0	0	0
FIFTH	Kribbibacteriaceae	6	3	0	0	0	0	0	0	0	0	0	0	0	NA	0	NA	0	0	0	0	0	0	0	0	0	0	0	0	0	0
SIXTH	Granulimonas	2	1	0	0	0	0	0	0	0	0	0	0	0	NA	0	NA	0	0	0	0	0	0	0	0	0	0	0	0	0	0
SIXTH	Kribbibacterium	2	1	0	0	0	0	0	0	0	0	0	0	0	NA	0	NA	0	0	0	0	0	0	0	0	0	0	0	0	0	0
SIXTH	Leptogranulimonas	2	1	0	0	0	0	0	0	0	0	0	0	0	NA	0	NA	0	0	0	0	0	0	0	0	0	0	0	0	0	0
FORTH	Eggerthellales	381	81	0	0	0	0	0	0	0	0	0	0	0	NA	0	NA	0	0	0	0	0	0	0	0	0	0	0	0	0	0
FIFTH	Eggerthellaceae	381	81	0	0	0	0	0	0	0	0	0	0	0	NA	0	NA	0	0	0	0	0	0	0	0	0	0	0	0	0	0
SIXTH	Adlercreutzia	91	25	0	0	0	0	0	0	0	0	0	0	0	NA	0	NA	0	0	0	0	0	0	0	0	0	0	0	0	0	0
SEVENTH	environmental_samples	17	1	0	0	0	0	0	0	0	0	0	0	0	NA	0	NA	0	0	0	0	0	0	0	0	0	0	0	0	0	0
SEVENTH	unclassified_Adlercreutzia	15	14	0	0	0	0	0	0	0	0	0	0	0	NA	0	NA	0	0	0	0	0	0	0	0	0	0	0	0	0	0
SIXTH	Anaerotardibacter	1	1	0	0	0	0	0	0	0	0	0	0	0	NA	0	NA	0	0	0	0	0	0	0	0	0	0	0	0	0	0
SIXTH	Arabiibacter	2	1	0	0	0	0	0	0	0	0	0	0	0	NA	0	NA	0	0	0	0	0	0	0	0	0	0	0	0	0	0
SIXTH	Berryella	4	2	0	0	0	0	0	0	0	0	0	0	0	NA	0	NA	0	0	0	0	0	0	0	0	0	0	0	0	0	0
SIXTH	Cryptobacterium	3	1	0	0	0	0	0	0	0	0	0	0	0	NA	0	NA	0	0	0	0	0	0	0	0	0	0	0	0	0	0
SIXTH	Curtanaerobium	2	1	0	0	0	0	0	0	0	0	0	0	0	NA	0	NA	0	0	0	0	0	0	0	0	0	0	0	0	0	0
SIXTH	Denitrobacterium	3	1	0	0	0	0	0	0	0	0	0	0	0	NA	0	NA	0	0	0	0	0	0	0	0	0	0	0	0	0	0
SIXTH	Eggerthella	150	15	0	0	0	0	0	0	0	0	0	0	0	NA	0	NA	0	0	0	0	0	0	0	0	0	0	0	0	0	0
SEVENTH	environmental_samples	2	1	0	0	0	0	0	0	0	0	0	0	0	NA	0	NA	0	0	0	0	0	0	0	0	0	0	0	0	0	0
SEVENTH	unclassified_Eggerthella	17	9	0	0	0	0	0	0	0	0	0	0	0	NA	0	NA	0	0	0	0	0	0	0	0	0	0	0	0	0	0
SIXTH	Ellagibacter	10	2	0	0	0	0	0	0	0	0	0	0	0	NA	0	NA	0	0	0	0	0	0	0	0	0	0	0	0	0	0
SEVENTH	environmental_samples	3	1	0	0	0	0	0	0	0	0	0	0	0	NA	0	NA	0	0	0	0	0	0	0	0	0	0	0	0	0	0
SIXTH	Enterorhabdus	1	1	0	0	0	0	0	0	0	0	0	0	0	NA	0	NA	0	0	0	0	0	0	0	0	0	0	0	0	0	0
SEVENTH	unclassified_Enterorhabdus	1	1	0	0	0	0	0	0	0	0	0	0	0	NA	0	NA	0	0	0	0	0	0	0	0	0	0	0	0	0	0
SIXTH	Enteroscipio	3	1	0	0	0	0	0	0	0	0	0	0	0	NA	0	NA	0	0	0	0	0	0	0	0	0	0	0	0	0	0
SIXTH	Gordonibacter	46	10	0	0	0	0	0	0	0	0	0	0	0	NA	0	NA	0	0	0	0	0	0	0	0	0	0	0	0	0	0
SEVENTH	unclassified_Gordonibacter	18	6	0	0	0	0	0	0	0	0	0	0	0	NA	0	NA	0	0	0	0	0	0	0	0	0	0	0	0	0	0
SIXTH	Hugonella	1	1	0	0	0	0	0	0	0	0	0	0	0	NA	0	NA	0	0	0	0	0	0	0	0	0	0	0	0	0	0
SIXTH	Paraeggerthella	4	4	0	0	0	0	0	0	0	0	0	0	0	NA	0	NA	0	0	0	0	0	0	0	0	0	0	0	0	0	0
SEVENTH	unclassified_Paraeggerthella	2	2	0	0	0	0	0	0	0	0	0	0	0	NA	0	NA	0	0	0	0	0	0	0	0	0	0	0	0	0	0
SIXTH	Phoenicibacter	2	1	0	0	0	0	0	0	0	0	0	0	0	NA	0	NA	0	0	0	0	0	0	0	0	0	0	0	0	0	0
SIXTH	Raoultibacter	7	3	0	0	0	0	0	0	0	0	0	0	0	NA	0	NA	0	0	0	0	0	0	0	0	0	0	0	0	0	0
SIXTH	Rubneribacter	1	1	0	0	0	0	0	0	0	0	0	0	0	NA	0	NA	0	0	0	0	0	0	0	0	0	0	0	0	0	0
SIXTH	Slackia	47	9	0	0	0	0	0	0	0	0	0	0	0	NA	0	NA	0	0	0	0	0	0	0	0	0	0	0	0	0	0
SEVENTH	environmental_samples	11	1	0	0	0	0	0	0	0	0	0	0	0	NA	0	NA	0	0	0	0	0	0	0	0	0	0	0	0	0	0
SEVENTH	unclassified_Slackia	5	2	0	0	0	0	0	0	0	0	0	0	0	NA	0	NA	0	0	0	0	0	0	0	0	0	0	0	0	0	0
SIXTH	Xiamenia	3	1	0	0	0	0	0	0	0	0	0	0	0	NA	0	NA	0	0	0	0	0	0	0	0	0	0	0	0	0	0
THIRD	Nitriliruptoria	17	12	0	0	0	0	0	0	0	0	0	0	0	NA	0	NA	0	0	0	0	0	0	0	0	0	0	0	0	0	0
FORTH	Egibacterales	1	1	0	0	0	0	0	0	0	0	0	0	0	NA	0	NA	0	0	0	0	0	0	0	0	0	0	0	0	0	0
FIFTH	Egibacteraceae	1	1	0	0	0	0	0	0	0	0	0	0	0	NA	0	NA	0	0	0	0	0	0	0	0	0	0	0	0	0	0
SIXTH	Egibacter	1	1	0	0	0	0	0	0	0	0	0	0	0	NA	0	NA	0	0	0	0	0	0	0	0	0	0	0	0	0	0
FORTH	Egicoccales	4	3	0	0	0	0	0	0	0	0	0	0	0	NA	0	NA	0	0	0	0	0	0	0	0	0	0	0	0	0	0
FIFTH	Egicoccaceae	4	3	0	0	0	0	0	0	0	0	0	0	0	NA	0	NA	0	0	0	0	0	0	0	0	0	0	0	0	0	0
SIXTH	Egicoccus	4	3	0	0	0	0	0	0	0	0	0	0	0	NA	0	NA	0	0	0	0	0	0	0	0	0	0	0	0	0	0
SEVENTH	unclassified_Egicoccus	2	2	0	0	0	0	0	0	0	0	0	0	0	NA	0	NA	0	0	0	0	0	0	0	0	0	0	0	0	0	0
FORTH	Euzebyales	7	4	0	0	0	0	0	0	0	0	0	0	0	NA	0	NA	0	0	0	0	0	0	0	0	0	0	0	0	0	0
FIFTH	Euzebyaceae	7	4	0	0	0	0	0	0	0	0	0	0	0	NA	0	NA	0	0	0	0	0	0	0	0	0	0	0	0	0	0
SIXTH	Euzebya	7	4	0	0	0	0	0	0	0	0	0	0	0	NA	0	NA	0	0	0	0	0	0	0	0	0	0	0	0	0	0
SEVENTH	unclassified_Euzebya	2	1	0	0	0	0	0	0	0	0	0	0	0	NA	0	NA	0	0	0	0	0	0	0	0	0	0	0	0	0	0
FORTH	Nitriliruptorales	2	2	0	0	0	0	0	0	0	0	0	0	0	NA	0	NA	0	0	0	0	0	0	0	0	0	0	0	0	0	0
FIFTH	Nitriliruptoraceae	2	2	0	0	0	0	0	0	0	0	0	0	0	NA	0	NA	0	0	0	0	0	0	0	0	0	0	0	0	0	0
SIXTH	Nitriliruptor	2	2	0	0	0	0	0	0	0	0	0	0	0	NA	0	NA	0	0	0	0	0	0	0	0	0	0	0	0	0	0
SEVENTH	unclassified_Nitriliruptor	1	1	0	0	0	0	0	0	0	0	0	0	0	NA	0	NA	0	0	0	0	0	0	0	0	0	0	0	0	0	0
FORTH	Salsipaludibacterales	1	1	0	0	0	0	0	0	0	0	0	0	0	NA	0	NA	0	0	0	0	0	0	0	0	0	0	0	0	0	0
FIFTH	Salsipaludibacteraceae	1	1	0	0	0	0	0	0	0	0	0	0	0	NA	0	NA	0	0	0	0	0	0	0	0	0	0	0	0	0	0
SIXTH	Salsipaludibacter	1	1	0	0	0	0	0	0	0	0	0	0	0	NA	0	NA	0	0	0	0	0	0	0	0	0	0	0	0	0	0
FORTH	Stomatohabitantales	2	1	0	0	0	0	0	0	0	0	0	0	0	NA	0	NA	0	0	0	0	0	0	0	0	0	0	0	0	0	0
FIFTH	Stomatohabitantaceae	2	1	0	0	0	0	0	0	0	0	0	0	0	NA	0	NA	0	0	0	0	0	0	0	0	0	0	0	0	0	0
SIXTH	Stomatohabitans	2	1	0	0	0	0	0	0	0	0	0	0	0	NA	0	NA	0	0	0	0	0	0	0	0	0	0	0	0	0	0
THIRD	Rubrobacteria	13	9	0	0	0	0	0	0	0	0	0	0	0	NA	0	NA	0	0	0	0	0	0	0	0	0	0	0	0	0	0
FORTH	Rubrobacterales	13	9	0	0	0	0	0	0	0	0	0	0	0	NA	0	NA	0	0	0	0	0	0	0	0	0	0	0	0	0	0
FIFTH	Rubrobacteraceae	13	9	0	0	0	0	0	0	0	0	0	0	0	NA	0	NA	0	0	0	0	0	0	0	0	0	0	0	0	0	0
SIXTH	Rubrobacter	13	9	0	0	0	0	0	0	0	0	0	0	0	NA	0	NA	0	0	0	0	0	0	0	0	0	0	0	0	0	0
THIRD	Thermoleophilia	48	39	0	0	0	0	0	0	0	0	0	0	0	NA	0	NA	0	0	0	0	0	0	0	0	0	0	0	0	0	0
FORTH	Gaiellales	6	2	0	0	0	0	0	0	0	0	0	0	0	NA	0	NA	0	0	0	0	0	0	0	0	0	0	0	0	0	0
FIFTH	Gaiellaceae	6	2	0	0	0	0	0	0	0	0	0	0	0	NA	0	NA	0	0	0	0	0	0	0	0	0	0	0	0	0	0
SIXTH	Gaiella	6	2	0	0	0	0	0	0	0	0	0	0	0	NA	0	NA	0	0	0	0	0	0	0	0	0	0	0	0	0	0
SEVENTH	unclassified_Gaiella	5	1	0	0	0	0	0	0	0	0	0	0	0	NA	0	NA	0	0	0	0	0	0	0	0	0	0	0	0	0	0
FORTH	Miltoncostaeales	2	2	0	0	0	0	0	0	0	0	0	0	0	NA	0	NA	0	0	0	0	0	0	0	0	0	0	0	0	0	0
FIFTH	Miltoncostaeaceae	2	2	0	0	0	0	0	0	0	0	0	0	0	NA	0	NA	0	0	0	0	0	0	0	0	0	0	0	0	0	0
SIXTH	Miltoncostaea	2	2	0	0	0	0	0	0	0	0	0	0	0	NA	0	NA	0	0	0	0	0	0	0	0	0	0	0	0	0	0
FORTH	Solirubrobacterales	38	34	0	0	0	0	0	0	0	0	0	0	0	NA	0	NA	0	0	0	0	0	0	0	0	0	0	0	0	0	0
FIFTH	Baekduiaceae	6	4	0	0	0	0	0	0	0	0	0	0	0	NA	0	NA	0	0	0	0	0	0	0	0	0	0	0	0	0	0
SIXTH	Baekduia	5	3	0	0	0	0	0	0	0	0	0	0	0	NA	0	NA	0	0	0	0	0	0	0	0	0	0	0	0	0	0
SEVENTH	unclassified_Baekduia	3	1	0	0	0	0	0	0	0	0	0	0	0	NA	0	NA	0	0	0	0	0	0	0	0	0	0	0	0	0	0
SIXTH	Svornostia	1	1	0	0	0	0	0	0	0	0	0	0	0	NA	0	NA	0	0	0	0	0	0	0	0	0	0	0	0	0	0
FIFTH	Capillimicrobiaceae	1	1	0	0	0	0	0	0	0	0	0	0	0	NA	0	NA	0	0	0	0	0	0	0	0	0	0	0	0	0	0
SIXTH	Capillimicrobium	1	1	0	0	0	0	0	0	0	0	0	0	0	NA	0	NA	0	0	0	0	0	0	0	0	0	0	0	0	0	0
FIFTH	Conexibacteraceae	13	11	0	0	0	0	0	0	0	0	0	0	0	NA	0	NA	0	0	0	0	0	0	0	0	0	0	0	0	0	0
SIXTH	Conexibacter	13	11	0	0	0	0	0	0	0	0	0	0	0	NA	0	NA	0	0	0	0	0	0	0	0	0	0	0	0	0	0
SEVENTH	unclassified_Conexibacter	8	8	0	0	0	0	0	0	0	0	0	0	0	NA	0	NA	0	0	0	0	0	0	0	0	0	0	0	0	0	0
FIFTH	Paraconexibacteraceae	4	4	0	0	0	0	0	0	0	0	0	0	0	NA	0	NA	0	0	0	0	0	0	0	0	0	0	0	0	0	0
SIXTH	Paraconexibacter	4	4	0	0	0	0	0	0	0	0	0	0	0	NA	0	NA	0	0	0	0	0	0	0	0	0	0	0	0	0	0
SEVENTH	unclassified_Paraconexibacter	2	2	0	0	0	0	0	0	0	0	0	0	0	NA	0	NA	0	0	0	0	0	0	0	0	0	0	0	0	0	0
FIFTH	Patulibacteraceae	8	8	0	0	0	0	0	0	0	0	0	0	0	NA	0	NA	0	0	0	0	0	0	0	0	0	0	0	0	0	0
SIXTH	Patulibacter	8	8	0	0	0	0	0	0	0	0	0	0	0	NA	0	NA	0	0	0	0	0	0	0	0	0	0	0	0	0	0
SEVENTH	unclassified_Patulibacter	3	3	0	0	0	0	0	0	0	0	0	0	0	NA	0	NA	0	0	0	0	0	0	0	0	0	0	0	0	0	0
FIFTH	Solirubrobacteraceae	6	6	0	0	0	0	0	0	0	0	0	0	0	NA	0	NA	0	0	0	0	0	0	0	0	0	0	0	0	0	0
SIXTH	Solirubrobacter	6	6	0	0	0	0	0	0	0	0	0	0	0	NA	0	NA	0	0	0	0	0	0	0	0	0	0	0	0	0	0
FORTH	Thermoleophilales	2	1	0	0	0	0	0	0	0	0	0	0	0	NA	0	NA	0	0	0	0	0	0	0	0	0	0	0	0	0	0
FIFTH	Thermoleophilaceae	2	1	0	0	0	0	0	0	0	0	0	0	0	NA	0	NA	0	0	0	0	0	0	0	0	0	0	0	0	0	0
SIXTH	Thermoleophilum	2	1	0	0	0	0	0	0	0	0	0	0	0	NA	0	NA	0	0	0	0	0	0	0	0	0	0	0	0	0	0
SECOND	Aquificota	55	40	0	0	0	0	0	0	0	0	0	0	0	NA	0	NA	0	0	0	0	0	0	0	0	0	0	0	0	0	0
THIRD	Aquificia	55	40	0	0	0	0	0	0	0	0	0	0	0	NA	0	NA	0	0	0	0	0	0	0	0	0	0	0	0	0	0
FORTH	Aquificales	44	30	0	0	0	0	0	0	0	0	0	0	0	NA	0	NA	0	0	0	0	0	0	0	0	0	0	0	0	0	0
FIFTH	Aquificaceae	23	17	0	0	0	0	0	0	0	0	0	0	0	NA	0	NA	0	0	0	0	0	0	0	0	0	0	0	0	0	0
SIXTH	Aquifex	1	1	0	0	0	0	0	0	0	0	0	0	0	NA	0	NA	0	0	0	0	0	0	0	0	0	0	0	0	0	0
SIXTH	Hydrogenivirga	2	2	0	0	0	0	0	0	0	0	0	0	0	NA	0	NA	0	0	0	0	0	0	0	0	0	0	0	0	0	0
SEVENTH	unclassified_Hydrogenivirga	1	1	0	0	0	0	0	0	0	0	0	0	0	NA	0	NA	0	0	0	0	0	0	0	0	0	0	0	0	0	0
SIXTH	Hydrogenobacter	8	4	0	0	0	0	0	0	0	0	0	0	0	NA	0	NA	0	0	0	0	0	0	0	0	0	0	0	0	0	0
SEVENTH	unclassified_Hydrogenobacter	2	2	0	0	0	0	0	0	0	0	0	0	0	NA	0	NA	0	0	0	0	0	0	0	0	0	0	0	0	0	0
SIXTH	Hydrogenobaculum	5	5	0	0	0	0	0	0	0	0	0	0	0	NA	0	NA	0	0	0	0	0	0	0	0	0	0	0	0	0	0
SEVENTH	unclassified_Hydrogenobaculum	5	5	0	0	0	0	0	0	0	0	0	0	0	NA	0	NA	0	0	0	0	0	0	0	0	0	0	0	0	0	0
SIXTH	Thermocrinis	7	5	0	0	0	0	0	0	0	0	0	0	0	NA	0	NA	0	0	0	0	0	0	0	0	0	0	0	0	0	0
SEVENTH	unclassified_Thermocrinis	3	1	0	0	0	0	0	0	0	0	0	0	0	NA	0	NA	0	0	0	0	0	0	0	0	0	0	0	0	0	0
FIFTH	Hydrogenothermaceae	21	13	0	0	0	0	0	0	0	0	0	0	0	NA	0	NA	0	0	0	0	0	0	0	0	0	0	0	0	0	0
SIXTH	Hydrogenothermus	1	1	0	0	0	0	0	0	0	0	0	0	0	NA	0	NA	0	0	0	0	0	0	0	0	0	0	0	0	0	0
SIXTH	Persephonella	11	6	0	0	0	0	0	0	0	0	0	0	0	NA	0	NA	0	0	0	0	0	0	0	0	0	0	0	0	0	0
SEVENTH	unclassified_Persephonella	8	3	0	0	0	0	0	0	0	0	0	0	0	NA	0	NA	0	0	0	0	0	0	0	0	0	0	0	0	0	0
SIXTH	Sulfurihydrogenibium	8	5	0	0	0	0	0	0	0	0	0	0	0	NA	0	NA	0	0	0	0	0	0	0	0	0	0	0	0	0	0
SEVENTH	unclassified_Sulfurihydrogenibium	4	2	0	0	0	0	0	0	0	0	0	0	0	NA	0	NA	0	0	0	0	0	0	0	0	0	0	0	0	0	0
SIXTH	Venenivibrio	1	1	0	0	0	0	0	0	0	0	0	0	0	NA	0	NA	0	0	0	0	0	0	0	0	0	0	0	0	0	0
FORTH	Desulfurobacteriales	11	10	0	0	0	0	0	0	0	0	0	0	0	NA	0	NA	0	0	0	0	0	0	0	0	0	0	0	0	0	0
FIFTH	Desulfurobacteriaceae	11	10	0	0	0	0	0	0	0	0	0	0	0	NA	0	NA	0	0	0	0	0	0	0	0	0	0	0	0	0	0
SIXTH	Balnearium	1	1	0	0	0	0	0	0	0	0	0	0	0	NA	0	NA	0	0	0	0	0	0	0	0	0	0	0	0	0	0
SIXTH	Desulfurobacterium	7	6	0	0	0	0	0	0	0	0	0	0	0	NA	0	NA	0	0	0	0	0	0	0	0	0	0	0	0	0	0
SEVENTH	unclassified_Desulfurobacterium	2	2	0	0	0	0	0	0	0	0	0	0	0	NA	0	NA	0	0	0	0	0	0	0	0	0	0	0	0	0	0
SIXTH	Phorcysia	1	1	0	0	0	0	0	0	0	0	0	0	0	NA	0	NA	0	0	0	0	0	0	0	0	0	0	0	0	0	0
SIXTH	Thermovibrio	2	2	0	0	0	0	0	0	0	0	0	0	0	NA	0	NA	0	0	0	0	0	0	0	0	0	0	0	0	0	0
SECOND	Armatimonadota	12	7	0	0	0	0	0	0	0	0	0	0	0	NA	0	NA	0	0	0	0	0	0	0	0	0	0	0	0	0	0
THIRD	Armatimonadia	5	4	0	0	0	0	0	0	0	0	0	0	0	NA	0	NA	0	0	0	0	0	0	0	0	0	0	0	0	0	0
FORTH	Armatimonadales	2	2	0	0	0	0	0	0	0	0	0	0	0	NA	0	NA	0	0	0	0	0	0	0	0	0	0	0	0	0	0
FIFTH	Armatimonadaceae	2	2	0	0	0	0	0	0	0	0	0	0	0	NA	0	NA	0	0	0	0	0	0	0	0	0	0	0	0	0	0
SIXTH	Armatimonas	2	2	0	0	0	0	0	0	0	0	0	0	0	NA	0	NA	0	0	0	0	0	0	0	0	0	0	0	0	0	0
SEVENTH	unclassified_Armatimonas	1	1	0	0	0	0	0	0	0	0	0	0	0	NA	0	NA	0	0	0	0	0	0	0	0	0	0	0	0	0	0
FORTH	Capsulimonadales	3	2	0	0	0	0	0	0	0	0	0	0	0	NA	0	NA	0	0	0	0	0	0	0	0	0	0	0	0	0	0
FIFTH	Capsulimonadaceae	3	2	0	0	0	0	0	0	0	0	0	0	0	NA	0	NA	0	0	0	0	0	0	0	0	0	0	0	0	0	0
SIXTH	Capsulimonas	3	2	0	0	0	0	0	0	0	0	0	0	0	NA	0	NA	0	0	0	0	0	0	0	0	0	0	0	0	0	0
SEVENTH	unclassified_Capsulimonas	2	1	0	0	0	0	0	0	0	0	0	0	0	NA	0	NA	0	0	0	0	0	0	0	0	0	0	0	0	0	0
THIRD	Chthonomonadia	6	2	0	0	0	0	0	0	0	0	0	0	0	NA	0	NA	0	0	0	0	0	0	0	0	0	0	0	0	0	0
FORTH	Chthonomonadales	6	2	0	0	0	0	0	0	0	0	0	0	0	NA	0	NA	0	0	0	0	0	0	0	0	0	0	0	0	0	0
FIFTH	Chthonomonadaceae	6	2	0	0	0	0	0	0	0	0	0	0	0	NA	0	NA	0	0	0	0	0	0	0	0	0	0	0	0	0	0
SIXTH	Chthonomonas	6	2	0	0	0	0	0	0	0	0	0	0	0	NA	0	NA	0	0	0	0	0	0	0	0	0	0	0	0	0	0
SEVENTH	unclassified_Chthonomonas	2	1	0	0	0	0	0	0	0	0	0	0	0	NA	0	NA	0	0	0	0	0	0	0	0	0	0	0	0	0	0
THIRD	Fimbriimonadia	1	1	0	0	0	0	0	0	0	0	0	0	0	NA	0	NA	0	0	0	0	0	0	0	0	0	0	0	0	0	0
FORTH	Fimbriimonadales	1	1	0	0	0	0	0	0	0	0	0	0	0	NA	0	NA	0	0	0	0	0	0	0	0	0	0	0	0	0	0
FIFTH	Fimbriimonadaceae	1	1	0	0	0	0	0	0	0	0	0	0	0	NA	0	NA	0	0	0	0	0	0	0	0	0	0	0	0	0	0
SIXTH	Fimbriimonas	1	1	0	0	0	0	0	0	0	0	0	0	0	NA	0	NA	0	0	0	0	0	0	0	0	0	0	0	0	0	0
SECOND	Atribacterota	4	3	0	0	0	0	0	0	0	0	0	0	0	NA	0	NA	0	0	0	0	0	0	0	0	0	0	0	0	0	0
THIRD	Atribacteria	4	3	0	0	0	0	0	0	0	0	0	0	0	NA	0	NA	0	0	0	0	0	0	0	0	0	0	0	0	0	0
FORTH	Atribacterales	4	3	0	0	0	0	0	0	0	0	0	0	0	NA	0	NA	0	0	0	0	0	0	0	0	0	0	0	0	0	0
FIFTH	Atribacteraceae	3	2	0	0	0	0	0	0	0	0	0	0	0	NA	0	NA	0	0	0	0	0	0	0	0	0	0	0	0	0	0
SIXTH	Atribacter	3	2	0	0	0	0	0	0	0	0	0	0	0	NA	0	NA	0	0	0	0	0	0	0	0	0	0	0	0	0	0
SEVENTH	unclassified_Atribacter	2	1	0	0	0	0	0	0	0	0	0	0	0	NA	0	NA	0	0	0	0	0	0	0	0	0	0	0	0	0	0
FIFTH	Thermatribacteraceae	1	1	0	0	0	0	0	0	0	0	0	0	0	NA	0	NA	0	0	0	0	0	0	0	0	0	0	0	0	0	0
SIXTH	Thermatribacter	1	1	0	0	0	0	0	0	0	0	0	0	0	NA	0	NA	0	0	0	0	0	0	0	0	0	0	0	0	0	0
SECOND	Bacillota	102102	8980	5889	5879	5.75797	780	8.68597	5463	5454	5.34172	742	8.26281	58	0.0106169	64	0.0117152	5418	5409	5.29764	714	7.951	44	47	5263	5255	5.14681	697	7.76169	37	38
THIRD	Bacilli	85518	6368	5855	5845	6.83482	756	11.8719	5430	5421	6.33902	719	11.2908	44	0.00810313	48	0.00883978	5396	5387	6.29926	698	10.9611	35	37	5241	5233	6.11918	681	10.6941	28	28
FORTH	Bacillales	44999	4624	5851	5841	12.9803	753	16.2846	5427	5418	12.0403	717	15.5061	42	0.00773908	46	0.00847614	5393	5384	11.9647	696	15.0519	33	35	5239	5231	11.6247	680	14.7059	27	27
FIFTH	Abyssicoccaceae	2	1	0	0	0	0	0	0	0	0	0	0	0	NA	0	NA	0	0	0	0	0	0	0	0	0	0	0	0	0	0
SIXTH	Abyssicoccus	2	1	0	0	0	0	0	0	0	0	0	0	0	NA	0	NA	0	0	0	0	0	0	0	0	0	0	0	0	0	0
FIFTH	Alicyclobacillaceae	81	48	0	0	0	0	0	0	0	0	0	0	0	NA	0	NA	0	0	0	0	0	0	0	0	0	0	0	0	0	0
SIXTH	Alicyclobacillus	55	30	0	0	0	0	0	0	0	0	0	0	0	NA	0	NA	0	0	0	0	0	0	0	0	0	0	0	0	0	0
SEVENTH	unclassified_Alicyclobacillus	5	5	0	0	0	0	0	0	0	0	0	0	0	NA	0	NA	0	0	0	0	0	0	0	0	0	0	0	0	0	0
SIXTH	Collibacillus	1	1	0	0	0	0	0	0	0	0	0	0	0	NA	0	NA	0	0	0	0	0	0	0	0	0	0	0	0	0	0
SIXTH	Effusibacillus	4	3	0	0	0	0	0	0	0	0	0	0	0	NA	0	NA	0	0	0	0	0	0	0	0	0	0	0	0	0	0
SIXTH	Ferroacidibacillus	4	1	0	0	0	0	0	0	0	0	0	0	0	NA	0	NA	0	0	0	0	0	0	0	0	0	0	0	0	0	0
SIXTH	Fodinisporobacter	1	1	0	0	0	0	0	0	0	0	0	0	0	NA	0	NA	0	0	0	0	0	0	0	0	0	0	0	0	0	0
SIXTH	Kyrpidia	7	3	0	0	0	0	0	0	0	0	0	0	0	NA	0	NA	0	0	0	0	0	0	0	0	0	0	0	0	0	0
SEVENTH	unclassified_Kyrpidia	1	1	0	0	0	0	0	0	0	0	0	0	0	NA	0	NA	0	0	0	0	0	0	0	0	0	0	0	0	0	0
SIXTH	Sulfoacidibacillus	2	2	0	0	0	0	0	0	0	0	0	0	0	NA	0	NA	0	0	0	0	0	0	0	0	0	0	0	0	0	0
SIXTH	Tumebacillus	7	7	0	0	0	0	0	0	0	0	0	0	0	NA	0	NA	0	0	0	0	0	0	0	0	0	0	0	0	0	0
SEVENTH	unclassified_Tumebacillus	1	1	0	0	0	0	0	0	0	0	0	0	0	NA	0	NA	0	0	0	0	0	0	0	0	0	0	0	0	0	0
FIFTH	Bacillaceae	12264	2420	5790	5782	47.1461	717	29.6281	5367	5360	43.7052	682	28.1818	27	0.00503074	28	0.00521707	5336	5329	43.4524	664	27.438	21	20	5186	5180	42.2374	651	26.9008	17	15
SIXTH	Aciduricibacillus	1	1	0	0	0	0	0	0	0	0	0	0	0	NA	0	NA	0	0	0	0	0	0	0	0	0	0	0	0	0	0
SIXTH	Aeribacillus	24	13	0	0	0	0	0	0	0	0	0	0	0	NA	0	NA	0	0	0	0	0	0	0	0	0	0	0	0	0	0
SEVENTH	unclassified_Aeribacillus	11	11	0	0	0	0	0	0	0	0	0	0	0	NA	0	NA	0	0	0	0	0	0	0	0	0	0	0	0	0	0
SIXTH	Aliibacillus	1	1	0	0	0	0	0	0	0	0	0	0	0	NA	0	NA	0	0	0	0	0	0	0	0	0	0	0	0	0	0
SIXTH	Alkalibacillus	9	7	0	0	0	0	0	0	0	0	0	0	0	NA	0	NA	0	0	0	0	0	0	0	0	0	0	0	0	0	0
SIXTH	Alkalicoccobacillus	8	4	0	0	0	0	0	0	0	0	0	0	0	NA	0	NA	0	0	0	0	0	0	0	0	0	0	0	0	0	0
SIXTH	Alkalicoccus	6	6	0	0	0	0	0	0	0	0	0	0	0	NA	0	NA	0	0	0	0	0	0	0	0	0	0	0	0	0	0
SIXTH	Alkalihalobacillus	19	14	0	0	0	0	0	0	0	0	0	0	0	NA	0	NA	0	0	0	0	0	0	0	0	0	0	0	0	0	0
SEVENTH	unclassified_Alkalihalobacillus	7	7	0	0	0	0	0	0	0	0	0	0	0	NA	0	NA	0	0	0	0	0	0	0	0	0	0	0	0	0	0
SIXTH	Alkalihalobacterium	4	4	0	0	0	0	0	0	0	0	0	0	0	NA	0	NA	0	0	0	0	0	0	0	0	0	0	0	0	0	0
SIXTH	Alkalihalophilus	11	4	0	0	0	0	0	0	0	0	0	0	0	NA	0	NA	0	0	0	0	0	0	0	0	0	0	0	0	0	0
SEVENTH	unclassified_Alkalihalophilus	1	1	0	0	0	0	0	0	0	0	0	0	0	NA	0	NA	0	0	0	0	0	0	0	0	0	0	0	0	0	0
SIXTH	Allobacillus	7	5	0	0	0	0	0	0	0	0	0	0	0	NA	0	NA	0	0	0	0	0	0	0	0	0	0	0	0	0	0
SEVENTH	environmental_samples	1	1	0	0	0	0	0	0	0	0	0	0	0	NA	0	NA	0	0	0	0	0	0	0	0	0	0	0	0	0	0
SEVENTH	unclassified_Allobacillus	1	1	0	0	0	0	0	0	0	0	0	0	0	NA	0	NA	0	0	0	0	0	0	0	0	0	0	0	0	0	0
SIXTH	Alteribacillus	7	6	0	0	0	0	0	0	0	0	0	0	0	NA	0	NA	0	0	0	0	0	0	0	0	0	0	0	0	0	0
SEVENTH	unclassified_Alteribacillus	3	3	0	0	0	0	0	0	0	0	0	0	0	NA	0	NA	0	0	0	0	0	0	0	0	0	0	0	0	0	0
SIXTH	Alteribacter	6	6	0	0	0	0	0	0	0	0	0	0	0	NA	0	NA	0	0	0	0	0	0	0	0	0	0	0	0	0	0
SIXTH	Amphibacillus	7	7	0	0	0	0	0	0	0	0	0	0	0	NA	0	NA	0	0	0	0	0	0	0	0	0	0	0	0	0	0
SEVENTH	unclassified_Amphibacillus	1	1	0	0	0	0	0	0	0	0	0	0	0	NA	0	NA	0	0	0	0	0	0	0	0	0	0	0	0	0	0
SIXTH	Anaerobacillus	7	7	0	0	0	0	0	0	0	0	0	0	0	NA	0	NA	0	0	0	0	0	0	0	0	0	0	0	0	0	0
SEVENTH	unclassified_Anaerobacillus	2	2	0	0	0	0	0	0	0	0	0	0	0	NA	0	NA	0	0	0	0	0	0	0	0	0	0	0	0	0	0
SIXTH	Anoxybacillus	91	41	0	0	0	0	0	0	0	0	0	0	0	NA	0	NA	0	0	0	0	0	0	0	0	0	0	0	0	0	0
SEVENTH	environmental_samples	1	1	0	0	0	0	0	0	0	0	0	0	0	NA	0	NA	0	0	0	0	0	0	0	0	0	0	0	0	0	0
SEVENTH	unclassified_Anoxybacillus	24	23	0	0	0	0	0	0	0	0	0	0	0	NA	0	NA	0	0	0	0	0	0	0	0	0	0	0	0	0	0
SIXTH	Aquibacillus	9	8	0	0	0	0	0	0	0	0	0	0	0	NA	0	NA	0	0	0	0	0	0	0	0	0	0	0	0	0	0
SIXTH	Aquisalibacillus	1	1	0	0	0	0	0	0	0	0	0	0	0	NA	0	NA	0	0	0	0	0	0	0	0	0	0	0	0	0	0
SIXTH	Aureibacillus	1	1	0	0	0	0	0	0	0	0	0	0	0	NA	0	NA	0	0	0	0	0	0	0	0	0	0	0	0	0	0
SIXTH	Bacillus	9278	1338	5754	5746	61.9315	689	51.4948	5331	5324	57.3831	654	48.8789	20	0.00375164	18	0.00337648	5314	5307	57.1998	648	48.4305	17	15	5164	5158	55.5939	635	47.4589	13	10
SEVENTH	Bacillus_altitudinis_complex	227	2	0	0	0	0	0	0	0	0	0	0	0	NA	0	NA	0	0	0	0	0	0	0	0	0	0	0	0	0	0
SEVENTH	environmental_samples	2	1	0	0	0	0	0	0	0	0	0	0	0	NA	0	NA	0	0	0	0	0	0	0	0	0	0	0	0	0	0
SEVENTH	unclassified_	0	0	0	0	0	0	0	0	0	NA	0	NA	0	0	0	0	0	0	0	0	0	0
SEVENTH	unclassified_Bacillus_in_firmicutes	954	935	397	394	41.2998	389	41.6043	372	369	38.6792	365	39.0374	14	0.0376344	11	0.0295699	370	367	38.4696	363	38.8235	12	9	356	354	37.1069	350	37.4332	11	8
SIXTH	Caldalkalibacillus	6	4	0	0	0	0	0	0	0	0	0	0	0	NA	0	NA	0	0	0	0	0	0	0	0	0	0	0	0	0	0
SIXTH	Caldibacillus	21	4	0	0	0	0	0	0	0	0	0	0	0	NA	0	NA	0	0	0	0	0	0	0	0	0	0	0	0	0	0
SEVENTH	unclassified_Caldibacillus	2	2	0	0	0	0	0	0	0	0	0	0	0	NA	0	NA	0	0	0	0	0	0	0	0	0	0	0	0	0	0
SIXTH	Caldifermentibacillus	23	1	0	0	0	0	0	0	0	0	0	0	0	NA	0	NA	0	0	0	0	0	0	0	0	0	0	0	0	0	0
SIXTH	Calditerricola	2	1	0	0	0	0	0	0	0	0	0	0	0	NA	0	NA	0	0	0	0	0	0	0	0	0	0	0	0	0	0
SIXTH	Calidifontibacillus	3	2	0	0	0	0	0	0	0	0	0	0	0	NA	0	NA	0	0	0	0	0	0	0	0	0	0	0	0	0	0
SIXTH	Cerasibacillus	4	3	0	0	0	0	0	0	0	0	0	0	0	NA	0	NA	0	0	0	0	0	0	0	0	0	0	0	0	0	0
SEVENTH	unclassified_Cerasibacillus	1	1	0	0	0	0	0	0	0	0	0	0	0	NA	0	NA	0	0	0	0	0	0	0	0	0	0	0	0	0	0
SIXTH	Compostibacillus	1	1	0	0	0	0	0	0	0	0	0	0	0	NA	0	NA	0	0	0	0	0	0	0	0	0	0	0	0	0	0
SIXTH	Cytobacillus	127	38	0	0	0	0	0	0	0	0	0	0	0	NA	0	NA	0	0	0	0	0	0	0	0	0	0	0	0	0	0
SEVENTH	unclassified_Cytobacillus	23	21	0	0	0	0	0	0	0	0	0	0	0	NA	0	NA	0	0	0	0	0	0	0	0	0	0	0	0	0	0
SIXTH	Desertibacillus	1	1	0	0	0	0	0	0	0	0	0	0	0	NA	0	NA	0	0	0	0	0	0	0	0	0	0	0	0	0	0
SIXTH	Domibacillus	19	14	0	0	0	0	0	0	0	0	0	0	0	NA	0	NA	0	0	0	0	0	0	0	0	0	0	0	0	0	0
SEVENTH	unclassified_Domibacillus	5	5	0	0	0	0	0	0	0	0	0	0	0	NA	0	NA	0	0	0	0	0	0	0	0	0	0	0	0	0	0
SIXTH	Ectobacillus	7	5	0	0	0	0	0	0	0	0	0	0	0	NA	0	NA	0	0	0	0	0	0	0	0	0	0	0	0	0	0
SEVENTH	unclassified_Ectobacillus	1	1	0	0	0	0	0	0	0	0	0	0	0	NA	0	NA	0	0	0	0	0	0	0	0	0	0	0	0	0	0
SIXTH	Edaphobacillus	1	1	0	0	0	0	0	0	0	0	0	0	0	NA	0	NA	0	0	0	0	0	0	0	0	0	0	0	0	0	0
SIXTH	Evansella	9	8	0	0	0	0	0	0	0	0	0	0	0	NA	0	NA	0	0	0	0	0	0	0	0	0	0	0	0	0	0
SEVENTH	unclassified_Evansella	3	3	0	0	0	0	0	0	0	0	0	0	0	NA	0	NA	0	0	0	0	0	0	0	0	0	0	0	0	0	0
SIXTH	Falsibacillus	2	2	0	0	0	0	0	0	0	0	0	0	0	NA	0	NA	0	0	0	0	0	0	0	0	0	0	0	0	0	0
SIXTH	Fervidibacillus	2	2	0	0	0	0	0	0	0	0	0	0	0	NA	0	NA	0	0	0	0	0	0	0	0	0	0	0	0	0	0
SIXTH	Fictibacillus	41	26	15	15	36.5854	11	42.3077	15	15	36.5854	11	42.3077	3	0.2	3	0.2	15	15	36.5854	11	42.3077	3	3	15	15	36.5854	11	42.3077	3	3
SEVENTH	unclassified_Fictibacillus	12	12	5	5	41.6667	5	41.6667	5	5	41.6667	5	41.6667	2	0.4	2	0.4	5	5	41.6667	5	41.6667	2	2	5	5	41.6667	5	41.6667	2	2
SIXTH	Filobacillus	1	1	0	0	0	0	0	0	0	0	0	0	0	NA	0	NA	0	0	0	0	0	0	0	0	0	0	0	0	0	0
SIXTH	Fredinandcohnia	7	4	0	0	0	0	0	0	0	0	0	0	0	NA	0	NA	0	0	0	0	0	0	0	0	0	0	0	0	0	0
SEVENTH	unclassified_Fredinandcohnia	2	2	0	0	0	0	0	0	0	0	0	0	0	NA	0	NA	0	0	0	0	0	0	0	0	0	0	0	0	0	0
SIXTH	Geobacillus	153	53	0	0	0	0	0	0	0	0	0	0	0	NA	0	NA	0	0	0	0	0	0	0	0	0	0	0	0	0	0
SEVENTH	unclassified_Geobacillus	40	38	0	0	0	0	0	0	0	0	0	0	0	NA	0	NA	0	0	0	0	0	0	0	0	0	0	0	0	0	0
SIXTH	Gottfriedia	17	5	0	0	0	0	0	0	0	0	0	0	0	NA	0	NA	0	0	0	0	0	0	0	0	0	0	0	0	0	0
SEVENTH	unclassified_Gottfriedia	1	1	0	0	0	0	0	0	0	0	0	0	0	NA	0	NA	0	0	0	0	0	0	0	0	0	0	0	0	0	0
SIXTH	Gracilibacillus	27	22	3	3	11.1111	2	9.09091	3	3	11.1111	2	9.09091	1	0.333333	1	0.333333	3	3	11.1111	2	9.09091	1	1	3	3	11.1111	2	9.09091	1	1
SEVENTH	unclassified_Gracilibacillus	3	3	1	1	33.3333	1	33.3333	1	1	33.3333	1	33.3333	1	1	1	1	1	1	33.3333	1	33.3333	1	1	1	1	33.3333	1	33.3333	1	1
SIXTH	Halalkalibacillus	2	2	0	0	0	0	0	0	0	0	0	0	0	NA	0	NA	0	0	0	0	0	0	0	0	0	0	0	0	0	0
SIXTH	Halalkalibacter	21	15	0	0	0	0	0	0	0	0	0	0	0	NA	0	NA	0	0	0	0	0	0	0	0	0	0	0	0	0	0
SEVENTH	unclassified_Halalkalibacter	2	2	0	0	0	0	0	0	0	0	0	0	0	NA	0	NA	0	0	0	0	0	0	0	0	0	0	0	0	0	0
SIXTH	Halalkalibacterium_ex_Joshi_et_al_2022	21	2	0	0	0	0	0	0	0	0	0	0	0	NA	0	NA	0	0	0	0	0	0	0	0	0	0	0	0	0	0
SIXTH	Halobacillus	54	34	0	0	0	0	0	0	0	0	0	0	0	NA	0	NA	0	0	0	0	0	0	0	0	0	0	0	0	0	0
SEVENTH	unclassified_Halobacillus	12	12	0	0	0	0	0	0	0	0	0	0	0	NA	0	NA	0	0	0	0	0	0	0	0	0	0	0	0	0	0
SIXTH	Halolactibacillus	8	4	0	0	0	0	0	0	0	0	0	0	0	NA	0	NA	0	0	0	0	0	0	0	0	0	0	0	0	0	0
SEVENTH	unclassified_Halolactibacillus	1	1	0	0	0	0	0	0	0	0	0	0	0	NA	0	NA	0	0	0	0	0	0	0	0	0	0	0	0	0	0
SIXTH	Heyndrickxia	167	23	3	3	1.79641	2	8.69565	3	3	1.79641	2	8.69565	1	0.333333	1	0.333333	0	0	0	0	0	0	0	0	0	0	0	0	0	0
SEVENTH	unclassified_Heyndrickxia	20	11	1	1	5	1	9.09091	1	1	5	1	9.09091	1	1	1	1	0	0	0	0	0	0	0	0	0	0	0	0	0	0
SIXTH	Lederbergia	16	9	0	0	0	0	0	0	0	0	0	0	0	NA	0	NA	0	0	0	0	0	0	0	0	0	0	0	0	0	0
SEVENTH	unclassified_Lederbergia	1	1	0	0	0	0	0	0	0	0	0	0	0	NA	0	NA	0	0	0	0	0	0	0	0	0	0	0	0	0	0
SIXTH	Lentibacillus	20	18	0	0	0	0	0	0	0	0	0	0	0	NA	0	NA	0	0	0	0	0	0	0	0	0	0	0	0	0	0
SEVENTH	unclassified_Lentibacillus	7	6	0	0	0	0	0	0	0	0	0	0	0	NA	0	NA	0	0	0	0	0	0	0	0	0	0	0	0	0	0
SIXTH	Litchfieldia	3	2	0	0	0	0	0	0	0	0	0	0	0	NA	0	NA	0	0	0	0	0	0	0	0	0	0	0	0	0	0
SIXTH	Litoribacterium	1	1	0	0	0	0	0	0	0	0	0	0	0	NA	0	NA	0	0	0	0	0	0	0	0	0	0	0	0	0	0
SIXTH	Lottiidibacillus	1	1	0	0	0	0	0	0	0	0	0	0	0	NA	0	NA	0	0	0	0	0	0	0	0	0	0	0	0	0	0
SIXTH	Lysinibacillus	269	110	5	5	1.85874	4	3.63636	5	5	1.85874	4	3.63636	1	0.2	3	0.6	0	0	0	0	0	0	0	0	0	0	0	0	0	0
SEVENTH	environmental_samples	1	1	0	0	0	0	0	0	0	0	0	0	0	NA	0	NA	0	0	0	0	0	0	0	0	0	0	0	0	0	0
SEVENTH	unclassified_Lysinibacillus	83	82	2	2	2.40964	2	2.43902	2	2	2.40964	2	2.43902	1	0.5	1	0.5	0	0	0	0	0	0	0	0	0	0	0	0	0	0
SIXTH	Mangrovibacillus	2	2	0	0	0	0	0	0	0	0	0	0	0	NA	0	NA	0	0	0	0	0	0	0	0	0	0	0	0	0	0
SEVENTH	unclassified_Mangrovibacillus	1	1	0	0	0	0	0	0	0	0	0	0	0	NA	0	NA	0	0	0	0	0	0	0	0	0	0	0	0	0	0
SIXTH	Marinococcus	8	5	0	0	0	0	0	0	0	0	0	0	0	NA	0	NA	0	0	0	0	0	0	0	0	0	0	0	0	0	0
SEVENTH	environmental_samples	1	1	0	0	0	0	0	0	0	0	0	0	0	NA	0	NA	0	0	0	0	0	0	0	0	0	0	0	0	0	0
SEVENTH	unclassified_Marinococcus	1	1	0	0	0	0	0	0	0	0	0	0	0	NA	0	NA	0	0	0	0	0	0	0	0	0	0	0	0	0	0
SIXTH	Massilibacterium	2	1	0	0	0	0	0	0	0	0	0	0	0	NA	0	NA	0	0	0	0	0	0	0	0	0	0	0	0	0	0
SIXTH	Melghiribacillus	1	1	0	0	0	0	0	0	0	0	0	0	0	NA	0	NA	0	0	0	0	0	0	0	0	0	0	0	0	0	0
SIXTH	Mesobacillus	35	15	0	0	0	0	0	0	0	0	0	0	0	NA	0	NA	0	0	0	0	0	0	0	0	0	0	0	0	0	0
SEVENTH	unclassified_Mesobacillus	4	4	0	0	0	0	0	0	0	0	0	0	0	NA	0	NA	0	0	0	0	0	0	0	0	0	0	0	0	0	0
SIXTH	Metabacillus	59	28	1	1	1.69492	1	3.57143	1	1	1.69492	1	3.57143	1	1	1	1	1	1	1.69492	1	3.57143	1	1	1	1	1.69492	1	3.57143	1	1
SEVENTH	environmental_samples	3	1	0	0	0	0	0	0	0	0	0	0	0	NA	0	NA	0	0	0	0	0	0	0	0	0	0	0	0	0	0
SEVENTH	unclassified_Metabacillus	7	7	0	0	0	0	0	0	0	0	0	0	0	NA	0	NA	0	0	0	0	0	0	0	0	0	0	0	0	0	0
SIXTH	Microaerobacter	1	1	0	0	0	0	0	0	0	0	0	0	0	NA	0	NA	0	0	0	0	0	0	0	0	0	0	0	0	0	0
SIXTH	Natribacillus	1	1	0	0	0	0	0	0	0	0	0	0	0	NA	0	NA	0	0	0	0	0	0	0	0	0	0	0	0	0	0
SIXTH	Natronobacillus	1	1	0	0	0	0	0	0	0	0	0	0	0	NA	0	NA	0	0	0	0	0	0	0	0	0	0	0	0	0	0
SIXTH	Neobacillus	108	47	0	0	0	0	0	0	0	0	0	0	0	NA	0	NA	0	0	0	0	0	0	0	0	0	0	0	0	0	0
SEVENTH	unclassified_Neobacillus	23	22	0	0	0	0	0	0	0	0	0	0	0	NA	0	NA	0	0	0	0	0	0	0	0	0	0	0	0	0	0
SIXTH	Niallia	65	25	0	0	0	0	0	0	0	0	0	0	0	NA	0	NA	0	0	0	0	0	0	0	0	0	0	0	0	0	0
SEVENTH	unclassified_Niallia	18	18	0	0	0	0	0	0	0	0	0	0	0	NA	0	NA	0	0	0	0	0	0	0	0	0	0	0	0	0	0
SIXTH	Numidum	2	1	0	0	0	0	0	0	0	0	0	0	0	NA	0	NA	0	0	0	0	0	0	0	0	0	0	0	0	0	0
SIXTH	Oceanobacillus	79	50	0	0	0	0	0	0	0	0	0	0	0	NA	0	NA	0	0	0	0	0	0	0	0	0	0	0	0	0	0
SEVENTH	unclassified_Oceanobacillus	20	20	0	0	0	0	0	0	0	0	0	0	0	NA	0	NA	0	0	0	0	0	0	0	0	0	0	0	0	0	0
SIXTH	Oikeobacillus	1	1	0	0	0	0	0	0	0	0	0	0	0	NA	0	NA	0	0	0	0	0	0	0	0	0	0	0	0	0	0
SIXTH	Ornithinibacillus	14	14	0	0	0	0	0	0	0	0	0	0	0	NA	0	NA	0	0	0	0	0	0	0	0	0	0	0	0	0	0
SEVENTH	unclassified_Ornithinibacillus	4	4	0	0	0	0	0	0	0	0	0	0	0	NA	0	NA	0	0	0	0	0	0	0	0	0	0	0	0	0	0
SIXTH	Paenalkalicoccus	1	1	0	0	0	0	0	0	0	0	0	0	0	NA	0	NA	0	0	0	0	0	0	0	0	0	0	0	0	0	0
SIXTH	Pallidibacillus	4	2	0	0	0	0	0	0	0	0	0	0	0	NA	0	NA	0	0	0	0	0	0	0	0	0	0	0	0	0	0
SIXTH	Parageobacillus	46	9	0	0	0	0	0	0	0	0	0	0	0	NA	0	NA	0	0	0	0	0	0	0	0	0	0	0	0	0	0
SEVENTH	unclassified_Parageobacillus	3	3	0	0	0	0	0	0	0	0	0	0	0	NA	0	NA	0	0	0	0	0	0	0	0	0	0	0	0	0	0
SIXTH	Paraliobacillus	12	8	0	0	0	0	0	0	0	0	0	0	0	NA	0	NA	0	0	0	0	0	0	0	0	0	0	0	0	0	0
SEVENTH	unclassified_Paraliobacillus	3	3	0	0	0	0	0	0	0	0	0	0	0	NA	0	NA	0	0	0	0	0	0	0	0	0	0	0	0	0	0
SIXTH	Paucisalibacillus	3	2	0	0	0	0	0	0	0	0	0	0	0	NA	0	NA	0	0	0	0	0	0	0	0	0	0	0	0	0	0
SEVENTH	unclassified_Paucisalibacillus	1	1	0	0	0	0	0	0	0	0	0	0	0	NA	0	NA	0	0	0	0	0	0	0	0	0	0	0	0	0	0
SIXTH	Pelagirhabdus	1	1	0	0	0	0	0	0	0	0	0	0	0	NA	0	NA	0	0	0	0	0	0	0	0	0	0	0	0	0	0
SIXTH	Peribacillus	184	46	6	6	3.26087	6	13.0435	6	6	3.26087	6	13.0435	2	0.333333	2	0.333333	0	0	0	0	0	0	0	0	0	0	0	0	0	0
SEVENTH	unclassified_Peribacillus	28	28	6	6	21.4286	6	21.4286	6	6	21.4286	6	21.4286	2	0.333333	2	0.333333	0	0	0	0	0	0	0	0	0	0	0	0	0	0
SIXTH	Perspicuibacillus	1	1	0	0	0	0	0	0	0	0	0	0	0	NA	0	NA	0	0	0	0	0	0	0	0	0	0	0	0	0	0
SIXTH	Piscibacillus	4	2	0	0	0	0	0	0	0	0	0	0	0	NA	0	NA	0	0	0	0	0	0	0	0	0	0	0	0	0	0
SIXTH	Pontibacillus	15	9	0	0	0	0	0	0	0	0	0	0	0	NA	0	NA	0	0	0	0	0	0	0	0	0	0	0	0	0	0
SEVENTH	unclassified_Pontibacillus	3	3	0	0	0	0	0	0	0	0	0	0	0	NA	0	NA	0	0	0	0	0	0	0	0	0	0	0	0	0	0
SIXTH	Pradoshia	2	2	0	0	0	0	0	0	0	0	0	0	0	NA	0	NA	0	0	0	0	0	0	0	0	0	0	0	0	0	0
SEVENTH	unclassified_Pradoshia	1	1	0	0	0	0	0	0	0	0	0	0	0	NA	0	NA	0	0	0	0	0	0	0	0	0	0	0	0	0	0
SIXTH	Priestia	563	24	2	2	0.35524	1	4.16667	2	2	0.35524	1	4.16667	1	0.5	1	0.5	2	2	0.35524	1	4.16667	1	1	2	2	0.35524	1	4.16667	1	1
SEVENTH	unclassified_Priestia	15	15	0	0	0	0	0	0	0	0	0	0	0	NA	0	NA	0	0	0	0	0	0	0	0	0	0	0	0	0	0
SIXTH	Pseudalkalibacillus	16	9	1	1	6.25	1	11.1111	1	1	6.25	1	11.1111	1	1	1	1	1	1	6.25	1	11.1111	1	1	1	1	6.25	1	11.1111	1	1
SEVENTH	unclassified_Pseudalkalibacillus	2	2	0	0	0	0	0	0	0	0	0	0	0	NA	0	NA	0	0	0	0	0	0	0	0	0	0	0	0	0	0
SIXTH	Pseudobacillus	1	1	0	0	0	0	0	0	0	0	0	0	0	NA	0	NA	0	0	0	0	0	0	0	0	0	0	0	0	0	0
SEVENTH	unclassified_Pseudobacillus	1	1	0	0	0	0	0	0	0	0	0	0	0	NA	0	NA	0	0	0	0	0	0	0	0	0	0	0	0	0	0
SIXTH	Pseudogracilibacillus	6	5	0	0	0	0	0	0	0	0	0	0	0	NA	0	NA	0	0	0	0	0	0	0	0	0	0	0	0	0	0
SEVENTH	unclassified_Pseudogracilibacillus	4	4	0	0	0	0	0	0	0	0	0	0	0	NA	0	NA	0	0	0	0	0	0	0	0	0	0	0	0	0	0
SIXTH	Pseudoneobacillus	1	1	0	0	0	0	0	0	0	0	0	0	0	NA	0	NA	0	0	0	0	0	0	0	0	0	0	0	0	0	0
SIXTH	Psychrobacillus	40	36	0	0	0	0	0	0	0	0	0	0	0	NA	0	NA	0	0	0	0	0	0	0	0	0	0	0	0	0	0
SEVENTH	environmental_samples	1	1	0	0	0	0	0	0	0	0	0	0	0	NA	0	NA	0	0	0	0	0	0	0	0	0	0	0	0	0	0
SEVENTH	unclassified_Psychrobacillus	26	26	0	0	0	0	0	0	0	0	0	0	0	NA	0	NA	0	0	0	0	0	0	0	0	0	0	0	0	0	0
SIXTH	Pueribacillus	1	1	0	0	0	0	0	0	0	0	0	0	0	NA	0	NA	0	0	0	0	0	0	0	0	0	0	0	0	0	0
SIXTH	Radiobacillus	2	2	0	0	0	0	0	0	0	0	0	0	0	NA	0	NA	0	0	0	0	0	0	0	0	0	0	0	0	0	0
SIXTH	Robertmurraya	14	9	0	0	0	0	0	0	0	0	0	0	0	NA	0	NA	0	0	0	0	0	0	0	0	0	0	0	0	0	0
SEVENTH	unclassified_Robertmurraya	3	3	0	0	0	0	0	0	0	0	0	0	0	NA	0	NA	0	0	0	0	0	0	0	0	0	0	0	0	0	0
SIXTH	Rossellomorea	64	16	0	0	0	0	0	0	0	0	0	0	0	NA	0	NA	0	0	0	0	0	0	0	0	0	0	0	0	0	0
SEVENTH	environmental_samples	1	1	0	0	0	0	0	0	0	0	0	0	0	NA	0	NA	0	0	0	0	0	0	0	0	0	0	0	0	0	0
SEVENTH	unclassified_Rossellomorea	9	9	0	0	0	0	0	0	0	0	0	0	0	NA	0	NA	0	0	0	0	0	0	0	0	0	0	0	0	0	0
SIXTH	Rubeoparvulum	2	1	0	0	0	0	0	0	0	0	0	0	0	NA	0	NA	0	0	0	0	0	0	0	0	0	0	0	0	0	0
SIXTH	Saccharococcus	2	2	0	0	0	0	0	0	0	0	0	0	0	NA	0	NA	0	0	0	0	0	0	0	0	0	0	0	0	0	0
SEVENTH	unclassified_Saccharococcus	1	1	0	0	0	0	0	0	0	0	0	0	0	NA	0	NA	0	0	0	0	0	0	0	0	0	0	0	0	0	0
SIXTH	Salibacterium	5	4	0	0	0	0	0	0	0	0	0	0	0	NA	0	NA	0	0	0	0	0	0	0	0	0	0	0	0	0	0
SIXTH	Salicibibacter	4	4	0	0	0	0	0	0	0	0	0	0	0	NA	0	NA	0	0	0	0	0	0	0	0	0	0	0	0	0	0
SIXTH	Salimicrobium	10	7	0	0	0	0	0	0	0	0	0	0	0	NA	0	NA	0	0	0	0	0	0	0	0	0	0	0	0	0	0
SEVENTH	unclassified_Salimicrobium	1	1	0	0	0	0	0	0	0	0	0	0	0	NA	0	NA	0	0	0	0	0	0	0	0	0	0	0	0	0	0
SIXTH	Salinibacillus	3	3	0	0	0	0	0	0	0	0	0	0	0	NA	0	NA	0	0	0	0	0	0	0	0	0	0	0	0	0	0
SIXTH	Salipaludibacillus	12	7	0	0	0	0	0	0	0	0	0	0	0	NA	0	NA	0	0	0	0	0	0	0	0	0	0	0	0	0	0
SEVENTH	unclassified_Salipaludibacillus	2	2	0	0	0	0	0	0	0	0	0	0	0	NA	0	NA	0	0	0	0	0	0	0	0	0	0	0	0	0	0
SIXTH	Salirhabdus	4	3	0	0	0	0	0	0	0	0	0	0	0	NA	0	NA	0	0	0	0	0	0	0	0	0	0	0	0	0	0
SEVENTH	unclassified_Salirhabdus	1	1	0	0	0	0	0	0	0	0	0	0	0	NA	0	NA	0	0	0	0	0	0	0	0	0	0	0	0	0	0
SIXTH	Salisediminibacterium	6	4	0	0	0	0	0	0	0	0	0	0	0	NA	0	NA	0	0	0	0	0	0	0	0	0	0	0	0	0	0
SIXTH	Saliterribacillus	1	1	0	0	0	0	0	0	0	0	0	0	0	NA	0	NA	0	0	0	0	0	0	0	0	0	0	0	0	0	0
SIXTH	Salsuginibacillus	2	2	0	0	0	0	0	0	0	0	0	0	0	NA	0	NA	0	0	0	0	0	0	0	0	0	0	0	0	0	0
SIXTH	Schinkia	24	1	0	0	0	0	0	0	0	0	0	0	0	NA	0	NA	0	0	0	0	0	0	0	0	0	0	0	0	0	0
SIXTH	Sediminibacillus	6	6	0	0	0	0	0	0	0	0	0	0	0	NA	0	NA	0	0	0	0	0	0	0	0	0	0	0	0	0	0
SEVENTH	unclassified_Sediminibacillus	1	1	0	0	0	0	0	0	0	0	0	0	0	NA	0	NA	0	0	0	0	0	0	0	0	0	0	0	0	0	0
SIXTH	Shouchella	75	12	0	0	0	0	0	0	0	0	0	0	0	NA	0	NA	0	0	0	0	0	0	0	0	0	0	0	0	0	0
SEVENTH	unclassified_Shouchella	1	1	0	0	0	0	0	0	0	0	0	0	0	NA	0	NA	0	0	0	0	0	0	0	0	0	0	0	0	0	0
SIXTH	Siminovitchia	24	7	0	0	0	0	0	0	0	0	0	0	0	NA	0	NA	0	0	0	0	0	0	0	0	0	0	0	0	0	0
SEVENTH	unclassified_Siminovitchia	2	2	0	0	0	0	0	0	0	0	0	0	0	NA	0	NA	0	0	0	0	0	0	0	0	0	0	0	0	0	0
SIXTH	Streptohalobacillus	1	1	0	0	0	0	0	0	0	0	0	0	0	NA	0	NA	0	0	0	0	0	0	0	0	0	0	0	0	0	0
SIXTH	Sutcliffiella	18	8	0	0	0	0	0	0	0	0	0	0	0	NA	0	NA	0	0	0	0	0	0	0	0	0	0	0	0	0	0
SEVENTH	unclassified_Sutcliffiella	4	3	0	0	0	0	0	0	0	0	0	0	0	NA	0	NA	0	0	0	0	0	0	0	0	0	0	0	0	0	0
SIXTH	Tenuibacillus	2	1	0	0	0	0	0	0	0	0	0	0	0	NA	0	NA	0	0	0	0	0	0	0	0	0	0	0	0	0	0
SIXTH	Tepidibacillus	4	4	0	0	0	0	0	0	0	0	0	0	0	NA	0	NA	0	0	0	0	0	0	0	0	0	0	0	0	0	0
SEVENTH	unclassified_Tepidibacillus	1	1	0	0	0	0	0	0	0	0	0	0	0	NA	0	NA	0	0	0	0	0	0	0	0	0	0	0	0	0	0
SIXTH	Terribacillus	26	9	0	0	0	0	0	0	0	0	0	0	0	NA	0	NA	0	0	0	0	0	0	0	0	0	0	0	0	0	0
SEVENTH	unclassified_Terribacillus	5	5	0	0	0	0	0	0	0	0	0	0	0	NA	0	NA	0	0	0	0	0	0	0	0	0	0	0	0	0	0
SIXTH	Terrihalobacillus	2	1	0	0	0	0	0	0	0	0	0	0	0	NA	0	NA	0	0	0	0	0	0	0	0	0	0	0	0	0	0
SIXTH	Terrilactibacillus	3	2	0	0	0	0	0	0	0	0	0	0	0	NA	0	NA	0	0	0	0	0	0	0	0	0	0	0	0	0	0
SIXTH	Texcoconibacillus	1	1	0	0	0	0	0	0	0	0	0	0	0	NA	0	NA	0	0	0	0	0	0	0	0	0	0	0	0	0	0
SIXTH	Thalassobacillus	9	5	0	0	0	0	0	0	0	0	0	0	0	NA	0	NA	0	0	0	0	0	0	0	0	0	0	0	0	0	0
SEVENTH	unclassified_Thalassobacillus	2	2	0	0	0	0	0	0	0	0	0	0	0	NA	0	NA	0	0	0	0	0	0	0	0	0	0	0	0	0	0
SIXTH	Thermolongibacillus	2	1	0	0	0	0	0	0	0	0	0	0	0	NA	0	NA	0	0	0	0	0	0	0	0	0	0	0	0	0	0
SIXTH	Tigheibacillus	1	1	0	0	0	0	0	0	0	0	0	0	0	NA	0	NA	0	0	0	0	0	0	0	0	0	0	0	0	0	0
SIXTH	Virgibacillus	100	48	0	0	0	0	0	0	0	0	0	0	0	NA	0	NA	0	0	0	0	0	0	0	0	0	0	0	0	0	0
SEVENTH	environmental_samples	3	1	0	0	0	0	0	0	0	0	0	0	0	NA	0	NA	0	0	0	0	0	0	0	0	0	0	0	0	0	0
SEVENTH	unclassified_Virgibacillus	23	20	0	0	0	0	0	0	0	0	0	0	0	NA	0	NA	0	0	0	0	0	0	0	0	0	0	0	0	0	0
SIXTH	Vulcanibacillus	1	1	0	0	0	0	0	0	0	0	0	0	0	NA	0	NA	0	0	0	0	0	0	0	0	0	0	0	0	0	0
FIFTH	Bacillales_incertae_sedis	285	206	0	0	0	0	0	0	0	0	0	0	0	NA	0	NA	0	0	0	0	0	0	0	0	0	0	0	0	0	0
SIXTH	Bacillales_Family_XII_Incertae_Sedis	269	195	0	0	0	0	0	0	0	0	0	0	0	NA	0	NA	0	0	0	0	0	0	0	0	0	0	0	0	0	0
SEVENTH	Exiguobacterium	269	195	0	0	0	0	0	0	0	0	0	0	0	NA	0	NA	0	0	0	0	0	0	0	0	0	0	0	0	0	0
EIGHTH	environmental_samples	3	1	0	0	0	0	0	0	0	0	0	0	0	NA	0	NA	0	0	0	0	0	0	0	0	0	0	0	0	0	0
EIGHTH	unclassified_Exiguobacterium	193	177	0	0	0	0	0	0	0	0	0	0	0	NA	0	NA	0	0	0	0	0	0	0	0	0	0	0	0	0	0
SIXTH	Bacillales_Family_X_Incertae_Sedis	9	4	0	0	0	0	0	0	0	0	0	0	0	NA	0	NA	0	0	0	0	0	0	0	0	0	0	0	0	0	0
SEVENTH	Brockia	1	1	0	0	0	0	0	0	0	0	0	0	0	NA	0	NA	0	0	0	0	0	0	0	0	0	0	0	0	0	0
SEVENTH	Hydrogenibacillus	7	2	0	0	0	0	0	0	0	0	0	0	0	NA	0	NA	0	0	0	0	0	0	0	0	0	0	0	0	0	0
EIGHTH	unclassified_Hydrogenibacillus	1	1	0	0	0	0	0	0	0	0	0	0	0	NA	0	NA	0	0	0	0	0	0	0	0	0	0	0	0	0	0
SEVENTH	Thermicanus	1	1	0	0	0	0	0	0	0	0	0	0	0	NA	0	NA	0	0	0	0	0	0	0	0	0	0	0	0	0	0
SIXTH	Geomicrobium	7	7	0	0	0	0	0	0	0	0	0	0	0	NA	0	NA	0	0	0	0	0	0	0	0	0	0	0	0	0	0
SEVENTH	unclassified_Geomicrobium	5	5	0	0	0	0	0	0	0	0	0	0	0	NA	0	NA	0	0	0	0	0	0	0	0	0	0	0	0	0	0
FIFTH	Gemellaceae	72	21	0	0	0	0	0	0	0	0	0	0	0	NA	0	NA	0	0	0	0	0	0	0	0	0	0	0	0	0	0
SIXTH	Gemella	69	19	0	0	0	0	0	0	0	0	0	0	0	NA	0	NA	0	0	0	0	0	0	0	0	0	0	0	0	0	0
SEVENTH	environmental_samples	8	1	0	0	0	0	0	0	0	0	0	0	0	NA	0	NA	0	0	0	0	0	0	0	0	0	0	0	0	0	0
SEVENTH	unclassified_Gemella	12	12	0	0	0	0	0	0	0	0	0	0	0	NA	0	NA	0	0	0	0	0	0	0	0	0	0	0	0	0	0
SIXTH	Gemelliphila	3	2	0	0	0	0	0	0	0	0	0	0	0	NA	0	NA	0	0	0	0	0	0	0	0	0	0	0	0	0	0
FIFTH	Listeriaceae	5989	41	0	0	0	0	0	0	0	0	0	0	0	NA	0	NA	0	0	0	0	0	0	0	0	0	0	0	0	0	0
SIXTH	Brochothrix	30	3	0	0	0	0	0	0	0	0	0	0	0	NA	0	NA	0	0	0	0	0	0	0	0	0	0	0	0	0	0
SEVENTH	unclassified_Brochothrix	1	1	0	0	0	0	0	0	0	0	0	0	0	NA	0	NA	0	0	0	0	0	0	0	0	0	0	0	0	0	0
SIXTH	Listeria	5959	38	0	0	0	0	0	0	0	0	0	0	0	NA	0	NA	0	0	0	0	0	0	0	0	0	0	0	0	0	0
SEVENTH	unclassified_Listeria	10	10	0	0	0	0	0	0	0	0	0	0	0	NA	0	NA	0	0	0	0	0	0	0	0	0	0	0	0	0	0
FIFTH	Paenibacillaceae	1759	958	49	48	2.72882	26	2.71399	48	47	2.67197	25	2.6096	12	0.25	12	0.25	46	45	2.55827	23	2.40084	10	10	42	41	2.33087	20	2.08768	7	7
SIXTH	Ammoniphilus	5	5	0	0	0	0	0	0	0	0	0	0	0	NA	0	NA	0	0	0	0	0	0	0	0	0	0	0	0	0	0
SEVENTH	unclassified_Ammoniphilus	3	3	0	0	0	0	0	0	0	0	0	0	0	NA	0	NA	0	0	0	0	0	0	0	0	0	0	0	0	0	0
SIXTH	Aneurinibacillus	43	12	1	1	2.32558	1	8.33333	1	1	2.32558	1	8.33333	1	1	1	1	0	0	0	0	0	0	0	0	0	0	0	0	0	0
SEVENTH	unclassified_Aneurinibacillus	5	4	0	0	0	0	0	0	0	0	0	0	0	NA	0	NA	0	0	0	0	0	0	0	0	0	0	0	0	0	0
SIXTH	Brevibacillus	234	69	38	38	16.2393	16	23.1884	38	38	16.2393	16	23.1884	4	0.105263	4	0.105263	38	38	16.2393	16	23.1884	4	4	34	34	14.5299	13	18.8406	1	1
SEVENTH	environmental_samples	1	1	0	0	0	0	0	0	0	0	0	0	0	NA	0	NA	0	0	0	0	0	0	0	0	0	0	0	0	0	0
SEVENTH	unclassified_Brevibacillus	39	39	13	13	33.3333	13	33.3333	13	13	33.3333	13	33.3333	4	0.307692	4	0.307692	13	13	33.3333	13	33.3333	4	4	10	10	25.641	10	25.641	1	1
SIXTH	Chengkuizengella	4	4	0	0	0	0	0	0	0	0	0	0	0	NA	0	NA	0	0	0	0	0	0	0	0	0	0	0	0	0	0
SEVENTH	unclassified_Chengkuizengella	1	1	0	0	0	0	0	0	0	0	0	0	0	NA	0	NA	0	0	0	0	0	0	0	0	0	0	0	0	0	0
SIXTH	Cohnella	48	41	0	0	0	0	0	0	0	0	0	0	0	NA	0	NA	0	0	0	0	0	0	0	0	0	0	0	0	0	0
SEVENTH	unclassified_Cohnella	15	12	0	0	0	0	0	0	0	0	0	0	0	NA	0	NA	0	0	0	0	0	0	0	0	0	0	0	0	0	0
SIXTH	Ferviditalea	1	1	0	0	0	0	0	0	0	0	0	0	0	NA	0	NA	0	0	0	0	0	0	0	0	0	0	0	0	0	0
SIXTH	Fontibacillus	3	3	0	0	0	0	0	0	0	0	0	0	0	NA	0	NA	0	0	0	0	0	0	0	0	0	0	0	0	0	0
SIXTH	Gordonibacillus	1	1	0	0	0	0	0	0	0	0	0	0	0	NA	0	NA	0	0	0	0	0	0	0	0	0	0	0	0	0	0
SIXTH	Gorillibacterium	4	3	0	0	0	0	0	0	0	0	0	0	0	NA	0	NA	0	0	0	0	0	0	0	0	0	0	0	0	0	0
SEVENTH	unclassified_Gorillibacterium	1	1	0	0	0	0	0	0	0	0	0	0	0	NA	0	NA	0	0	0	0	0	0	0	0	0	0	0	0	0	0
SIXTH	Insulibacter	1	1	0	0	0	0	0	0	0	0	0	0	0	NA	0	NA	0	0	0	0	0	0	0	0	0	0	0	0	0	0
SIXTH	Longirhabdus	1	1	0	0	0	0	0	0	0	0	0	0	0	NA	0	NA	0	0	0	0	0	0	0	0	0	0	0	0	0	0
SIXTH	Paenibacillus	1393	801	10	9	0.646088	9	1.1236	9	8	0.5743	8	0.998752	7	0.777778	7	0.777778	8	7	0.502513	7	0.873908	6	6	8	7	0.502513	7	0.873908	6	6
SEVENTH	environmental_samples	6	1	0	0	0	0	0	0	0	0	0	0	0	NA	0	NA	0	0	0	0	0	0	0	0	0	0	0	0	0	0
SEVENTH	unclassified_Paenibacillus	538	507	4	3	0.557621	3	0.591716	4	3	0.557621	3	0.591716	3	0.75	3	0.75	4	3	0.557621	3	0.591716	3	3	4	3	0.557621	3	0.591716	3	3
SIXTH	Saccharibacillus	15	11	0	0	0	0	0	0	0	0	0	0	0	NA	0	NA	0	0	0	0	0	0	0	0	0	0	0	0	0	0
SEVENTH	unclassified_Saccharibacillus	4	4	0	0	0	0	0	0	0	0	0	0	0	NA	0	NA	0	0	0	0	0	0	0	0	0	0	0	0	0	0
SIXTH	Thermobacillus	4	4	0	0	0	0	0	0	0	0	0	0	0	NA	0	NA	0	0	0	0	0	0	0	0	0	0	0	0	0	0
SEVENTH	unclassified_Thermobacillus	2	2	0	0	0	0	0	0	0	0	0	0	0	NA	0	NA	0	0	0	0	0	0	0	0	0	0	0	0	0	0
SIXTH	Xylanibacillus	2	1	0	0	0	0	0	0	0	0	0	0	0	NA	0	NA	0	0	0	0	0	0	0	0	0	0	0	0	0	0
FIFTH	Pasteuriaceae	1	1	0	0	0	0	0	0	0	0	0	0	0	NA	0	NA	0	0	0	0	0	0	0	0	0	0	0	0	0	0
SIXTH	Pasteuria	1	1	0	0	0	0	0	0	0	0	0	0	0	NA	0	NA	0	0	0	0	0	0	0	0	0	0	0	0	0	0
FIFTH	Planococcaceae	364	265	1	1	0.274725	1	0.377358	1	1	0.274725	1	0.377358	1	1	1	1	0	0	0	0	0	0	0	0	0	0	0	0	0	0
SIXTH	Bhargavaea	11	6	0	0	0	0	0	0	0	0	0	0	0	NA	0	NA	0	0	0	0	0	0	0	0	0	0	0	0	0	0
SEVENTH	unclassified_Bhargavaea	1	1	0	0	0	0	0	0	0	0	0	0	0	NA	0	NA	0	0	0	0	0	0	0	0	0	0	0	0	0	0
SIXTH	Caryophanon	2	2	0	0	0	0	0	0	0	0	0	0	0	NA	0	NA	0	0	0	0	0	0	0	0	0	0	0	0	0	0
SIXTH	Chryseomicrobium	3	3	0	0	0	0	0	0	0	0	0	0	0	NA	0	NA	0	0	0	0	0	0	0	0	0	0	0	0	0	0
SEVENTH	unclassified_Chryseomicrobium	1	1	0	0	0	0	0	0	0	0	0	0	0	NA	0	NA	0	0	0	0	0	0	0	0	0	0	0	0	0	0
SIXTH	Filibacter	1	1	0	0	0	0	0	0	0	0	0	0	0	NA	0	NA	0	0	0	0	0	0	0	0	0	0	0	0	0	0
SIXTH	Indiicoccus	1	1	0	0	0	0	0	0	0	0	0	0	0	NA	0	NA	0	0	0	0	0	0	0	0	0	0	0	0	0	0
SIXTH	Jeotgalibacillus	13	13	0	0	0	0	0	0	0	0	0	0	0	NA	0	NA	0	0	0	0	0	0	0	0	0	0	0	0	0	0
SEVENTH	unclassified_Jeotgalibacillus	4	4	0	0	0	0	0	0	0	0	0	0	0	NA	0	NA	0	0	0	0	0	0	0	0	0	0	0	0	0	0
SIXTH	Kurthia	27	11	0	0	0	0	0	0	0	0	0	0	0	NA	0	NA	0	0	0	0	0	0	0	0	0	0	0	0	0	0
SEVENTH	unclassified_Kurthia	5	5	0	0	0	0	0	0	0	0	0	0	0	NA	0	NA	0	0	0	0	0	0	0	0	0	0	0	0	0	0
SIXTH	Metalysinibacillus	1	1	0	0	0	0	0	0	0	0	0	0	0	NA	0	NA	0	0	0	0	0	0	0	0	0	0	0	0	0	0
SIXTH	Metasolibacillus	7	5	0	0	0	0	0	0	0	0	0	0	0	NA	0	NA	0	0	0	0	0	0	0	0	0	0	0	0	0	0
SEVENTH	unclassified_Metasolibacillus	4	3	0	0	0	0	0	0	0	0	0	0	0	NA	0	NA	0	0	0	0	0	0	0	0	0	0	0	0	0	0
SIXTH	Paenisporosarcina	9	9	0	0	0	0	0	0	0	0	0	0	0	NA	0	NA	0	0	0	0	0	0	0	0	0	0	0	0	0	0
SEVENTH	unclassified_Paenisporosarcina	5	5	0	0	0	0	0	0	0	0	0	0	0	NA	0	NA	0	0	0	0	0	0	0	0	0	0	0	0	0	0
SIXTH	Planococcus	76	51	0	0	0	0	0	0	0	0	0	0	0	NA	0	NA	0	0	0	0	0	0	0	0	0	0	0	0	0	0
SEVENTH	environmental_samples	1	1	0	0	0	0	0	0	0	0	0	0	0	NA	0	NA	0	0	0	0	0	0	0	0	0	0	0	0	0	0
SEVENTH	unclassified_Planococcus_in_firmicutes	22	22	0	0	0	0	0	0	0	0	0	0	0	NA	0	NA	0	0	0	0	0	0	0	0	0	0	0	0	0	0
SIXTH	Planomicrobium	13	8	0	0	0	0	0	0	0	0	0	0	0	NA	0	NA	0	0	0	0	0	0	0	0	0	0	0	0	0	0
SEVENTH	unclassified_Planomicrobium	5	5	0	0	0	0	0	0	0	0	0	0	0	NA	0	NA	0	0	0	0	0	0	0	0	0	0	0	0	0	0
SIXTH	Rummeliibacillus	14	9	1	1	7.14286	1	11.1111	1	1	7.14286	1	11.1111	1	1	1	1	0	0	0	0	0	0	0	0	0	0	0	0	0	0
SEVENTH	environmental_samples	1	1	0	0	0	0	0	0	0	0	0	0	0	NA	0	NA	0	0	0	0	0	0	0	0	0	0	0	0	0	0
SEVENTH	unclassified_Rummeliibacillus	5	5	0	0	0	0	0	0	0	0	0	0	0	NA	0	NA	0	0	0	0	0	0	0	0	0	0	0	0	0	0
SIXTH	Savagea	1	1	0	0	0	0	0	0	0	0	0	0	0	NA	0	NA	0	0	0	0	0	0	0	0	0	0	0	0	0	0
SIXTH	Solibacillus	34	28	0	0	0	0	0	0	0	0	0	0	0	NA	0	NA	0	0	0	0	0	0	0	0	0	0	0	0	0	0
SEVENTH	unclassified_Solibacillus	23	20	0	0	0	0	0	0	0	0	0	0	0	NA	0	NA	0	0	0	0	0	0	0	0	0	0	0	0	0	0
SIXTH	Sporosarcina	107	85	0	0	0	0	0	0	0	0	0	0	0	NA	0	NA	0	0	0	0	0	0	0	0	0	0	0	0	0	0
SEVENTH	unclassified_Sporosarcina	63	62	0	0	0	0	0	0	0	0	0	0	0	NA	0	NA	0	0	0	0	0	0	0	0	0	0	0	0	0	0
SIXTH	Tetzosporium	1	1	0	0	0	0	0	0	0	0	0	0	0	NA	0	NA	0	0	0	0	0	0	0	0	0	0	0	0	0	0
SIXTH	Ureibacillus	30	19	0	0	0	0	0	0	0	0	0	0	0	NA	0	NA	0	0	0	0	0	0	0	0	0	0	0	0	0	0
SEVENTH	unclassified_Ureibacillus	8	8	0	0	0	0	0	0	0	0	0	0	0	NA	0	NA	0	0	0	0	0	0	0	0	0	0	0	0	0	0
SIXTH	Viridibacillus	13	11	0	0	0	0	0	0	0	0	0	0	0	NA	0	NA	0	0	0	0	0	0	0	0	0	0	0	0	0	0
SEVENTH	unclassified_Viridibacillus	8	8	0	0	0	0	0	0	0	0	0	0	0	NA	0	NA	0	0	0	0	0	0	0	0	0	0	0	0	0	0
FIFTH	Salinicoccaceae	6	4	0	0	0	0	0	0	0	0	0	0	0	NA	0	NA	0	0	0	0	0	0	0	0	0	0	0	0	0	0
SIXTH	Lacicoccus	2	2	0	0	0	0	0	0	0	0	0	0	0	NA	0	NA	0	0	0	0	0	0	0	0	0	0	0	0	0	0
SIXTH	Phocicoccus	4	2	0	0	0	0	0	0	0	0	0	0	0	NA	0	NA	0	0	0	0	0	0	0	0	0	0	0	0	0	0
FIFTH	Sporolactobacillaceae	39	28	0	0	0	0	0	0	0	0	0	0	0	NA	0	NA	0	0	0	0	0	0	0	0	0	0	0	0	0	0
SIXTH	Caenibacillus	1	1	0	0	0	0	0	0	0	0	0	0	0	NA	0	NA	0	0	0	0	0	0	0	0	0	0	0	0	0	0
SIXTH	Pullulanibacillus	4	3	0	0	0	0	0	0	0	0	0	0	0	NA	0	NA	0	0	0	0	0	0	0	0	0	0	0	0	0	0
SEVENTH	unclassified_Pullulanibacillus	1	1	0	0	0	0	0	0	0	0	0	0	0	NA	0	NA	0	0	0	0	0	0	0	0	0	0	0	0	0	0
SIXTH	Scopulibacillus	2	2	0	0	0	0	0	0	0	0	0	0	0	NA	0	NA	0	0	0	0	0	0	0	0	0	0	0	0	0	0
SIXTH	Sinobaca	2	2	0	0	0	0	0	0	0	0	0	0	0	NA	0	NA	0	0	0	0	0	0	0	0	0	0	0	0	0	0
SEVENTH	unclassified_Sinobaca	1	1	0	0	0	0	0	0	0	0	0	0	0	NA	0	NA	0	0	0	0	0	0	0	0	0	0	0	0	0	0
SIXTH	Sporolactobacillus	28	18	0	0	0	0	0	0	0	0	0	0	0	NA	0	NA	0	0	0	0	0	0	0	0	0	0	0	0	0	0
SEVENTH	unclassified_Sporolactobacillus	6	6	0	0	0	0	0	0	0	0	0	0	0	NA	0	NA	0	0	0	0	0	0	0	0	0	0	0	0	0	0
SIXTH	Tuberibacillus	2	2	0	0	0	0	0	0	0	0	0	0	0	NA	0	NA	0	0	0	0	0	0	0	0	0	0	0	0	0	0
SEVENTH	unclassified_Tuberibacillus	1	1	0	0	0	0	0	0	0	0	0	0	0	NA	0	NA	0	0	0	0	0	0	0	0	0	0	0	0	0	0
FIFTH	Staphylococcaceae	24069	578	0	0	0	0	0	0	0	0	0	0	0	NA	0	NA	0	0	0	0	0	0	0	0	0	0	0	0	0	0
SIXTH	Aliicoccus	1	1	0	0	0	0	0	0	0	0	0	0	0	NA	0	NA	0	0	0	0	0	0	0	0	0	0	0	0	0	0
SIXTH	Jeotgalicoccus	18	12	0	0	0	0	0	0	0	0	0	0	0	NA	0	NA	0	0	0	0	0	0	0	0	0	0	0	0	0	0
SEVENTH	unclassified_Jeotgalicoccus	4	4	0	0	0	0	0	0	0	0	0	0	0	NA	0	NA	0	0	0	0	0	0	0	0	0	0	0	0	0	0
SIXTH	Macrococcoides	94	4	0	0	0	0	0	0	0	0	0	0	0	NA	0	NA	0	0	0	0	0	0	0	0	0	0	0	0	0	0
SIXTH	Macrococcus	26	12	0	0	0	0	0	0	0	0	0	0	0	NA	0	NA	0	0	0	0	0	0	0	0	0	0	0	0	0	0
SEVENTH	unclassified_Macrococcus	4	4	0	0	0	0	0	0	0	0	0	0	0	NA	0	NA	0	0	0	0	0	0	0	0	0	0	0	0	0	0
SIXTH	Mammaliicoccus	452	72	0	0	0	0	0	0	0	0	0	0	0	NA	0	NA	0	0	0	0	0	0	0	0	0	0	0	0	0	0
SEVENTH	unclassified_Mammaliicoccus	67	67	0	0	0	0	0	0	0	0	0	0	0	NA	0	NA	0	0	0	0	0	0	0	0	0	0	0	0	0	0
SIXTH	Nosocomiicoccus	11	5	0	0	0	0	0	0	0	0	0	0	0	NA	0	NA	0	0	0	0	0	0	0	0	0	0	0	0	0	0
SEVENTH	unclassified_Nosocomiicoccus	3	3	0	0	0	0	0	0	0	0	0	0	0	NA	0	NA	0	0	0	0	0	0	0	0	0	0	0	0	0	0
SIXTH	Salinicoccus	29	15	0	0	0	0	0	0	0	0	0	0	0	NA	0	NA	0	0	0	0	0	0	0	0	0	0	0	0	0	0
SEVENTH	unclassified_Salinicoccus	4	4	0	0	0	0	0	0	0	0	0	0	0	NA	0	NA	0	0	0	0	0	0	0	0	0	0	0	0	0	0
SIXTH	Staphylococcus	23438	457	0	0	0	0	0	0	0	0	0	0	0	NA	0	NA	0	0	0	0	0	0	0	0	0	0	0	0	0	0
SEVENTH	environmental_samples	2	1	0	0	0	0	0	0	0	0	0	0	0	NA	0	NA	0	0	0	0	0	0	0	0	0	0	0	0	0	0
SEVENTH	Staphylococcus_cohnii_species_complex	92	8	0	0	0	0	0	0	0	0	0	0	0	NA	0	NA	0	0	0	0	0	0	0	0	0	0	0	0	0	0
EIGHTH	unclassified_Staphylococcus_cohnii_species_complex	6	6	0	0	0	0	0	0	0	0	0	0	0	NA	0	NA	0	0	0	0	0	0	0	0	0	0	0	0	0	0
SEVENTH	unclassified_Staphylococcus	400	385	0	0	0	0	0	0	0	0	0	0	0	NA	0	NA	0	0	0	0	0	0	0	0	0	0	0	0	0	0
FIFTH	Thermoactinomycetaceae	68	53	11	10	14.7059	9	16.9811	11	10	14.7059	9	16.9811	6	0.545455	6	0.545455	11	10	14.7059	9	16.9811	6	6	11	10	14.7059	9	16.9811	6	6
SIXTH	Baia	1	1	0	0	0	0	0	0	0	0	0	0	0	NA	0	NA	0	0	0	0	0	0	0	0	0	0	0	0	0	0
SIXTH	Croceifilum	1	1	0	0	0	0	0	0	0	0	0	0	0	NA	0	NA	0	0	0	0	0	0	0	0	0	0	0	0	0	0
SIXTH	Desmospora	2	2	0	0	0	0	0	0	0	0	0	0	0	NA	0	NA	0	0	0	0	0	0	0	0	0	0	0	0	0	0
SIXTH	Hazenella	1	1	0	0	0	0	0	0	0	0	0	0	0	NA	0	NA	0	0	0	0	0	0	0	0	0	0	0	0	0	0
SIXTH	Kroppenstedtia	4	3	2	1	25	1	33.3333	2	1	25	1	33.3333	2	1	2	1	2	1	25	1	33.3333	2	2	2	1	25	1	33.3333	2	2
SIXTH	Laceyella	5	3	0	0	0	0	0	0	0	0	0	0	0	NA	0	NA	0	0	0	0	0	0	0	0	0	0	0	0	0	0
SIXTH	Lihuaxuella	1	1	0	0	0	0	0	0	0	0	0	0	0	NA	0	NA	0	0	0	0	0	0	0	0	0	0	0	0	0	0
SIXTH	Marininema	2	2	2	2	100	2	100	2	2	100	2	100	2	1	2	1	2	2	100	2	100	2	2	2	2	100	2	100	2	2
SIXTH	Marinithermofilum	1	1	0	0	0	0	0	0	0	0	0	0	0	NA	0	NA	0	0	0	0	0	0	0	0	0	0	0	0	0	0
SIXTH	Mechercharimyces	1	1	0	0	0	0	0	0	0	0	0	0	0	NA	0	NA	0	0	0	0	0	0	0	0	0	0	0	0	0	0
SEVENTH	unclassified_Mechercharimyces	1	1	0	0	0	0	0	0	0	0	0	0	0	NA	0	NA	0	0	0	0	0	0	0	0	0	0	0	0	0	0
SIXTH	Melghirimyces	3	3	2	2	66.6667	2	66.6667	2	2	66.6667	2	66.6667	1	0.5	1	0.5	2	2	66.6667	2	66.6667	1	1	2	2	66.6667	2	66.6667	1	1
SIXTH	Novibacillus	1	1	0	0	0	0	0	0	0	0	0	0	0	NA	0	NA	0	0	0	0	0	0	0	0	0	0	0	0	0	0
SIXTH	Paenactinomyces	2	1	0	0	0	0	0	0	0	0	0	0	0	NA	0	NA	0	0	0	0	0	0	0	0	0	0	0	0	0	0
SIXTH	Paludifilum	1	1	1	1	100	1	100	1	1	100	1	100	1	1	1	1	1	1	100	1	100	1	1	1	1	100	1	100	1	1
SIXTH	Planifilum	2	2	0	0	0	0	0	0	0	0	0	0	0	NA	0	NA	0	0	0	0	0	0	0	0	0	0	0	0	0	0
SIXTH	Polycladomyces	3	3	0	0	0	0	0	0	0	0	0	0	0	NA	0	NA	0	0	0	0	0	0	0	0	0	0	0	0	0	0
SIXTH	Polycladospora	2	1	0	0	0	0	0	0	0	0	0	0	0	NA	0	NA	0	0	0	0	0	0	0	0	0	0	0	0	0	0
SIXTH	Risungbinella	2	1	2	2	100	1	100	2	2	100	1	100	1	0.5	1	0.5	2	2	100	1	100	1	1	2	2	100	1	100	1	1
SIXTH	Seinonella	1	1	0	0	0	0	0	0	0	0	0	0	0	NA	0	NA	0	0	0	0	0	0	0	0	0	0	0	0	0	0
SIXTH	Shimazuella	3	3	2	2	66.6667	2	66.6667	2	2	66.6667	2	66.6667	1	0.5	2	1	2	2	66.6667	2	66.6667	1	2	2	2	66.6667	2	66.6667	1	2
SIXTH	Staphylospora	1	1	0	0	0	0	0	0	0	0	0	0	0	NA	0	NA	0	0	0	0	0	0	0	0	0	0	0	0	0	0
SIXTH	Thermoactinomyces	26	17	0	0	0	0	0	0	0	0	0	0	0	NA	0	NA	0	0	0	0	0	0	0	0	0	0	0	0	0	0
SEVENTH	unclassified_Thermoactinomyces	13	13	0	0	0	0	0	0	0	0	0	0	0	NA	0	NA	0	0	0	0	0	0	0	0	0	0	0	0	0	0
SIXTH	Thermoflavimicrobium	2	2	0	0	0	0	0	0	0	0	0	0	0	NA	0	NA	0	0	0	0	0	0	0	0	0	0	0	0	0	0
FORTH	Lactobacillales	40519	1744	4	4	0.00987191	3	0.172018	3	3	0.00740393	2	0.114679	2	0.666667	2	0.666667	3	3	0.00740393	2	0.114679	2	2	2	2	0.00493596	1	0.0573394	1	1
FIFTH	Aerococcaceae	306	59	0	0	0	0	0	0	0	0	0	0	0	NA	0	NA	0	0	0	0	0	0	0	0	0	0	0	0	0	0
SIXTH	Abiotrophia	35	4	0	0	0	0	0	0	0	0	0	0	0	NA	0	NA	0	0	0	0	0	0	0	0	0	0	0	0	0	0
SEVENTH	environmental_samples	11	1	0	0	0	0	0	0	0	0	0	0	0	NA	0	NA	0	0	0	0	0	0	0	0	0	0	0	0	0	0
SEVENTH	unclassified_Abiotrophia	5	2	0	0	0	0	0	0	0	0	0	0	0	NA	0	NA	0	0	0	0	0	0	0	0	0	0	0	0	0	0
SIXTH	Aerococcus	224	32	0	0	0	0	0	0	0	0	0	0	0	NA	0	NA	0	0	0	0	0	0	0	0	0	0	0	0	0	0
SEVENTH	Aerococcus_incertae_sedis	11	2	0	0	0	0	0	0	0	0	0	0	0	NA	0	NA	0	0	0	0	0	0	0	0	0	0	0	0	0	0
SEVENTH	unclassified_Aerococcus	19	18	0	0	0	0	0	0	0	0	0	0	0	NA	0	NA	0	0	0	0	0	0	0	0	0	0	0	0	0	0
SIXTH	Dolosicoccus	3	1	0	0	0	0	0	0	0	0	0	0	0	NA	0	NA	0	0	0	0	0	0	0	0	0	0	0	0	0	0
SIXTH	Eremococcus	2	1	0	0	0	0	0	0	0	0	0	0	0	NA	0	NA	0	0	0	0	0	0	0	0	0	0	0	0	0	0
SIXTH	Facklamia	16	8	0	0	0	0	0	0	0	0	0	0	0	NA	0	NA	0	0	0	0	0	0	0	0	0	0	0	0	0	0
SEVENTH	unclassified_Facklamia	4	4	0	0	0	0	0	0	0	0	0	0	0	NA	0	NA	0	0	0	0	0	0	0	0	0	0	0	0	0	0
SIXTH	Falseniella	2	1	0	0	0	0	0	0	0	0	0	0	0	NA	0	NA	0	0	0	0	0	0	0	0	0	0	0	0	0	0
SIXTH	Fundicoccus	4	2	0	0	0	0	0	0	0	0	0	0	0	NA	0	NA	0	0	0	0	0	0	0	0	0	0	0	0	0	0
SIXTH	Globicatella	9	4	0	0	0	0	0	0	0	0	0	0	0	NA	0	NA	0	0	0	0	0	0	0	0	0	0	0	0	0	0
SEVENTH	unclassified_Globicatella	2	2	0	0	0	0	0	0	0	0	0	0	0	NA	0	NA	0	0	0	0	0	0	0	0	0	0	0	0	0	0
SIXTH	Hutsoniella	1	1	0	0	0	0	0	0	0	0	0	0	0	NA	0	NA	0	0	0	0	0	0	0	0	0	0	0	0	0	0
SIXTH	Ignavigranum	4	1	0	0	0	0	0	0	0	0	0	0	0	NA	0	NA	0	0	0	0	0	0	0	0	0	0	0	0	0	0
SIXTH	Ruoffia	4	2	0	0	0	0	0	0	0	0	0	0	0	NA	0	NA	0	0	0	0	0	0	0	0	0	0	0	0	0	0
SIXTH	Suicoccus	1	1	0	0	0	0	0	0	0	0	0	0	0	NA	0	NA	0	0	0	0	0	0	0	0	0	0	0	0	0	0
SIXTH	Vaginisenegalia	1	1	0	0	0	0	0	0	0	0	0	0	0	NA	0	NA	0	0	0	0	0	0	0	0	0	0	0	0	0	0
FIFTH	Carnobacteriaceae	360	93	0	0	0	0	0	0	0	0	0	0	0	NA	0	NA	0	0	0	0	0	0	0	0	0	0	0	0	0	0
SIXTH	Alkalibacterium	16	13	0	0	0	0	0	0	0	0	0	0	0	NA	0	NA	0	0	0	0	0	0	0	0	0	0	0	0	0	0
SEVENTH	unclassified_Alkalibacterium	4	4	0	0	0	0	0	0	0	0	0	0	0	NA	0	NA	0	0	0	0	0	0	0	0	0	0	0	0	0	0
SIXTH	Allofustis	1	1	0	0	0	0	0	0	0	0	0	0	0	NA	0	NA	0	0	0	0	0	0	0	0	0	0	0	0	0	0
SIXTH	Alloiococcus	4	1	0	0	0	0	0	0	0	0	0	0	0	NA	0	NA	0	0	0	0	0	0	0	0	0	0	0	0	0	0
SIXTH	Atopobacter	2	2	0	0	0	0	0	0	0	0	0	0	0	NA	0	NA	0	0	0	0	0	0	0	0	0	0	0	0	0	0
SEVENTH	unclassified_Atopobacter	1	1	0	0	0	0	0	0	0	0	0	0	0	NA	0	NA	0	0	0	0	0	0	0	0	0	0	0	0	0	0
SIXTH	Atopococcus	2	1	0	0	0	0	0	0	0	0	0	0	0	NA	0	NA	0	0	0	0	0	0	0	0	0	0	0	0	0	0
SIXTH	Atopostipes	1	1	0	0	0	0	0	0	0	0	0	0	0	NA	0	NA	0	0	0	0	0	0	0	0	0	0	0	0	0	0
SIXTH	Carnobacterium	153	24	0	0	0	0	0	0	0	0	0	0	0	NA	0	NA	0	0	0	0	0	0	0	0	0	0	0	0	0	0
SEVENTH	unclassified_Carnobacterium	35	13	0	0	0	0	0	0	0	0	0	0	0	NA	0	NA	0	0	0	0	0	0	0	0	0	0	0	0	0	0
SIXTH	Desemzia	7	3	0	0	0	0	0	0	0	0	0	0	0	NA	0	NA	0	0	0	0	0	0	0	0	0	0	0	0	0	0
SEVENTH	unclassified_Desemzia	2	2	0	0	0	0	0	0	0	0	0	0	0	NA	0	NA	0	0	0	0	0	0	0	0	0	0	0	0	0	0
SIXTH	Dolosigranulum	36	2	0	0	0	0	0	0	0	0	0	0	0	NA	0	NA	0	0	0	0	0	0	0	0	0	0	0	0	0	0
SIXTH	Granulicatella	45	17	0	0	0	0	0	0	0	0	0	0	0	NA	0	NA	0	0	0	0	0	0	0	0	0	0	0	0	0	0
SEVENTH	environmental_samples	17	1	0	0	0	0	0	0	0	0	0	0	0	NA	0	NA	0	0	0	0	0	0	0	0	0	0	0	0	0	0
SEVENTH	unclassified_Granulicatella	12	12	0	0	0	0	0	0	0	0	0	0	0	NA	0	NA	0	0	0	0	0	0	0	0	0	0	0	0	0	0
SIXTH	Isobaculum	1	1	0	0	0	0	0	0	0	0	0	0	0	NA	0	NA	0	0	0	0	0	0	0	0	0	0	0	0	0	0
SIXTH	Jeotgalibaca	48	7	0	0	0	0	0	0	0	0	0	0	0	NA	0	NA	0	0	0	0	0	0	0	0	0	0	0	0	0	0
SEVENTH	unclassified_Jeotgalibaca	2	2	0	0	0	0	0	0	0	0	0	0	0	NA	0	NA	0	0	0	0	0	0	0	0	0	0	0	0	0	0
SIXTH	Lacticigenium	1	1	0	0	0	0	0	0	0	0	0	0	0	NA	0	NA	0	0	0	0	0	0	0	0	0	0	0	0	0	0
SIXTH	Marinilactibacillus	13	6	0	0	0	0	0	0	0	0	0	0	0	NA	0	NA	0	0	0	0	0	0	0	0	0	0	0	0	0	0
SEVENTH	unclassified_Marinilactibacillus	3	3	0	0	0	0	0	0	0	0	0	0	0	NA	0	NA	0	0	0	0	0	0	0	0	0	0	0	0	0	0
SIXTH	Pisciglobus	1	1	0	0	0	0	0	0	0	0	0	0	0	NA	0	NA	0	0	0	0	0	0	0	0	0	0	0	0	0	0
SIXTH	Trichococcus	29	12	0	0	0	0	0	0	0	0	0	0	0	NA	0	NA	0	0	0	0	0	0	0	0	0	0	0	0	0	0
SEVENTH	environmental_samples	6	1	0	0	0	0	0	0	0	0	0	0	0	NA	0	NA	0	0	0	0	0	0	0	0	0	0	0	0	0	0
SEVENTH	unclassified_Trichococcus	2	2	0	0	0	0	0	0	0	0	0	0	0	NA	0	NA	0	0	0	0	0	0	0	0	0	0	0	0	0	0
FIFTH	Enterococcaceae	10099	429	3	3	0.0297059	2	0.4662	2	2	0.0198039	1	0.2331	1	0.5	1	0.5	2	2	0.0198039	1	0.2331	1	1	2	2	0.0198039	1	0.2331	1	1
SIXTH	Bavariicoccus	1	1	0	0	0	0	0	0	0	0	0	0	0	NA	0	NA	0	0	0	0	0	0	0	0	0	0	0	0	0	0
SIXTH	Catellicoccus	1	1	0	0	0	0	0	0	0	0	0	0	0	NA	0	NA	0	0	0	0	0	0	0	0	0	0	0	0	0	0
SIXTH	Enterococcus	9858	389	3	3	0.0304321	2	0.514139	2	2	0.0202881	1	0.257069	1	0.5	1	0.5	2	2	0.0202881	1	0.257069	1	1	2	2	0.0202881	1	0.257069	1	1
SEVENTH	environmental_samples	19	1	0	0	0	0	0	0	0	0	0	0	0	NA	0	NA	0	0	0	0	0	0	0	0	0	0	0	0	0	0
SEVENTH	unclassified_Enterococcus	361	323	0	0	0	0	0	0	0	0	0	0	0	NA	0	NA	0	0	0	0	0	0	0	0	0	0	0	0	0	0
SIXTH	Melissococcus	27	2	0	0	0	0	0	0	0	0	0	0	0	NA	0	NA	0	0	0	0	0	0	0	0	0	0	0	0	0	0
SEVENTH	unclassified_Melissococcus	1	1	0	0	0	0	0	0	0	0	0	0	0	NA	0	NA	0	0	0	0	0	0	0	0	0	0	0	0	0	0
SIXTH	Pilibacter	1	1	0	0	0	0	0	0	0	0	0	0	0	NA	0	NA	0	0	0	0	0	0	0	0	0	0	0	0	0	0
SIXTH	Tetragenococcus	102	5	0	0	0	0	0	0	0	0	0	0	0	NA	0	NA	0	0	0	0	0	0	0	0	0	0	0	0	0	0
SIXTH	Vagococcus	109	30	0	0	0	0	0	0	0	0	0	0	0	NA	0	NA	0	0	0	0	0	0	0	0	0	0	0	0	0	0
SEVENTH	environmental_samples	2	1	0	0	0	0	0	0	0	0	0	0	0	NA	0	NA	0	0	0	0	0	0	0	0	0	0	0	0	0	0
SEVENTH	unclassified_Vagococcus	12	5	0	0	0	0	0	0	0	0	0	0	0	NA	0	NA	0	0	0	0	0	0	0	0	0	0	0	0	0	0
FIFTH	Lactobacillaceae	8563	577	1	1	0.0116782	1	0.17331	1	1	0.0116782	1	0.17331	1	1	1	1	1	1	0.0116782	1	0.17331	1	1	0	0	0	0	0	0	0
SIXTH	Acetilactobacillus	1	1	0	0	0	0	0	0	0	0	0	0	0	NA	0	NA	0	0	0	0	0	0	0	0	0	0	0	0	0	0
SIXTH	Agrilactobacillus	4	3	0	0	0	0	0	0	0	0	0	0	0	NA	0	NA	0	0	0	0	0	0	0	0	0	0	0	0	0	0
SIXTH	Amylolactobacillus	5	2	0	0	0	0	0	0	0	0	0	0	0	NA	0	NA	0	0	0	0	0	0	0	0	0	0	0	0	0	0
SIXTH	Apilactobacillus	93	14	0	0	0	0	0	0	0	0	0	0	0	NA	0	NA	0	0	0	0	0	0	0	0	0	0	0	0	0	0
[truncated: 6,372 more rows]

## Sheet: class_A_metrics
taxonomic_level	OTU	total_genomes	species	class_totals_hits	class_totals_genomes	class_totals_genomes_perc	class_totals_species	class_totals_species_perc	class_whole_hits	class_whole_genomes	class_whole_genomes_perc	class_whole_species	class_whole_species_perc	dif_clusters_cds	rel_richness_cds	dif_clusters_proteins	rel_richness_proteins	true_hits	true_hits_genomes	true_hits_genomes_perc	true_hits_species	true_hits_species_perc	true_hits_cds_clu	true_hits_prot_clu	true_hits_secreted	true_hits_secreted_genomes	true_hits_secreted_genomes_perc	true_hits_secreted_species	true_hits_secreted_species_perc	true_hits_secreted_cds_clu	true_hits_secreted_prot_clu
FIRST	Archaea	2312	1192	6	6	0.259516	2	0.167785	0	0	0	0	0	0	NA	0	NA	0	0	0	0	0	0	0	0	0	0	0	0	0	0
SECOND	Candidatus_Bathyarchaeota	5	2	0	0	0	0	0	0	0	0	0	0	0	NA	0	NA	0	0	0	0	0	0	0	0	0	0	0	0	0	0
THIRD	Candidatus_Bathyarchaeia	5	2	0	0	0	0	0	0	0	0	0	0	0	NA	0	NA	0	0	0	0	0	0	0	0	0	0	0	0	0	0
FORTH	Candidatus_Bathyarchaeales	4	1	0	0	0	0	0	0	0	0	0	0	0	NA	0	NA	0	0	0	0	0	0	0	0	0	0	0	0	0	0
FIFTH	Candidatus_Bathycorpusculaceae	4	1	0	0	0	0	0	0	0	0	0	0	0	NA	0	NA	0	0	0	0	0	0	0	0	0	0	0	0	0	0
SIXTH	Candidatus_Bathycorpusculum	4	1	0	0	0	0	0	0	0	0	0	0	0	NA	0	NA	0	0	0	0	0	0	0	0	0	0	0	0	0	0
SEVENTH	unclassified_Candidatus_Bathycorpusculum	4	1	0	0	0	0	0	0	0	0	0	0	0	NA	0	NA	0	0	0	0	0	0	0	0	0	0	0	0	0	0
FORTH	Candidatus_Hecatellales	1	1	0	0	0	0	0	0	0	0	0	0	0	NA	0	NA	0	0	0	0	0	0	0	0	0	0	0	0	0	0
FIFTH	Candidatus_Hecatellaceae	1	1	0	0	0	0	0	0	0	0	0	0	0	NA	0	NA	0	0	0	0	0	0	0	0	0	0	0	0	0	0
SIXTH	Candidatus_Hecatella	1	1	0	0	0	0	0	0	0	0	0	0	0	NA	0	NA	0	0	0	0	0	0	0	0	0	0	0	0	0	0
SECOND	Candidatus_Borrarchaeota	1	1	0	0	0	0	0	0	0	0	0	0	0	NA	0	NA	0	0	0	0	0	0	0	0	0	0	0	0	0	0
THIRD	Candidatus_Borrarchaeia	1	1	0	0	0	0	0	0	0	0	0	0	0	NA	0	NA	0	0	0	0	0	0	0	0	0	0	0	0	0	0
FORTH	Candidatus_Borrarchaeales	1	1	0	0	0	0	0	0	0	0	0	0	0	NA	0	NA	0	0	0	0	0	0	0	0	0	0	0	0	0	0
FIFTH	Candidatus_Borrarchaeaceae	1	1	0	0	0	0	0	0	0	0	0	0	0	NA	0	NA	0	0	0	0	0	0	0	0	0	0	0	0	0	0
SIXTH	Candidatus_Borrarchaeum	1	1	0	0	0	0	0	0	0	0	0	0	0	NA	0	NA	0	0	0	0	0	0	0	0	0	0	0	0	0	0
SEVENTH	unclassified_Candidatus_Borrarchaeum	1	1	0	0	0	0	0	0	0	0	0	0	0	NA	0	NA	0	0	0	0	0	0	0	0	0	0	0	0	0	0
SECOND	Candidatus_Culexarchaeota	1	1	0	0	0	0	0	0	0	0	0	0	0	NA	0	NA	0	0	0	0	0	0	0	0	0	0	0	0	0	0
THIRD	Candidatus_Culexarchaeia	1	1	0	0	0	0	0	0	0	0	0	0	0	NA	0	NA	0	0	0	0	0	0	0	0	0	0	0	0	0	0
FORTH	Candidatus_Culexarchaeles	1	1	0	0	0	0	0	0	0	0	0	0	0	NA	0	NA	0	0	0	0	0	0	0	0	0	0	0	0	0	0
FIFTH	Candidatus_Culexarchaeaceae	1	1	0	0	0	0	0	0	0	0	0	0	0	NA	0	NA	0	0	0	0	0	0	0	0	0	0	0	0	0	0
SIXTH	Candidatus_Culexarchaeum	1	1	0	0	0	0	0	0	0	0	0	0	0	NA	0	NA	0	0	0	0	0	0	0	0	0	0	0	0	0	0
SECOND	Candidatus_Hadarchaeota	3	1	0	0	0	0	0	0	0	0	0	0	0	NA	0	NA	0	0	0	0	0	0	0	0	0	0	0	0	0	0
THIRD	Candidatus_Hadarchaeia	3	1	0	0	0	0	0	0	0	0	0	0	0	NA	0	NA	0	0	0	0	0	0	0	0	0	0	0	0	0	0
FORTH	Candidatus_Hadarchaeales	3	1	0	0	0	0	0	0	0	0	0	0	0	NA	0	NA	0	0	0	0	0	0	0	0	0	0	0	0	0	0
FIFTH	Candidatus_Hadarchaeaceae	3	1	0	0	0	0	0	0	0	0	0	0	0	NA	0	NA	0	0	0	0	0	0	0	0	0	0	0	0	0	0
SIXTH	Candidatus_Hadarchaeum	3	1	0	0	0	0	0	0	0	0	0	0	0	NA	0	NA	0	0	0	0	0	0	0	0	0	0	0	0	0	0
SEVENTH	unclassified_Candidatus_Hadarchaeum	3	1	0	0	0	0	0	0	0	0	0	0	0	NA	0	NA	0	0	0	0	0	0	0	0	0	0	0	0	0	0
SECOND	Candidatus_Lokiarchaeota	1	1	0	0	0	0	0	0	0	0	0	0	0	NA	0	NA	0	0	0	0	0	0	0	0	0	0	0	0	0	0
THIRD	Candidatus_Lokiarchaeia	1	1	0	0	0	0	0	0	0	0	0	0	0	NA	0	NA	0	0	0	0	0	0	0	0	0	0	0	0	0	0
FORTH	Candidatus_Prometheoarchaeales	1	1	0	0	0	0	0	0	0	0	0	0	0	NA	0	NA	0	0	0	0	0	0	0	0	0	0	0	0	0	0
FIFTH	Candidatus_Prometheoarchaeaceae	1	1	0	0	0	0	0	0	0	0	0	0	0	NA	0	NA	0	0	0	0	0	0	0	0	0	0	0	0	0	0
SIXTH	Candidatus_Prometheoarchaeum	1	1	0	0	0	0	0	0	0	0	0	0	0	NA	0	NA	0	0	0	0	0	0	0	0	0	0	0	0	0	0
SECOND	Candidatus_Micrarchaeota	2	2	0	0	0	0	0	0	0	0	0	0	0	NA	0	NA	0	0	0	0	0	0	0	0	0	0	0	0	0	0
THIRD	Candidatus_Mancarchaeum	1	1	0	0	0	0	0	0	0	0	0	0	0	NA	0	NA	0	0	0	0	0	0	0	0	0	0	0	0	0	0
THIRD	Candidatus_Micrarchaeia	1	1	0	0	0	0	0	0	0	0	0	0	0	NA	0	NA	0	0	0	0	0	0	0	0	0	0	0	0	0	0
FORTH	Candidatus_Micrarchaeales	1	1	0	0	0	0	0	0	0	0	0	0	0	NA	0	NA	0	0	0	0	0	0	0	0	0	0	0	0	0	0
FIFTH	Candidatus_Micrarchaeaceae	1	1	0	0	0	0	0	0	0	0	0	0	0	NA	0	NA	0	0	0	0	0	0	0	0	0	0	0	0	0	0
SIXTH	Candidatus_Micrarchaeum	1	1	0	0	0	0	0	0	0	0	0	0	0	NA	0	NA	0	0	0	0	0	0	0	0	0	0	0	0	0	0
SEVENTH	unclassified_Candidatus_Micrarchaeum	1	1	0	0	0	0	0	0	0	0	0	0	0	NA	0	NA	0	0	0	0	0	0	0	0	0	0	0	0	0	0
SECOND	Candidatus_Nanohalarchaeota	3	3	0	0	0	0	0	0	0	0	0	0	0	NA	0	NA	0	0	0	0	0	0	0	0	0	0	0	0	0	0
THIRD	Candidatus_Nanohalarchaeota_incertae_sedis	2	2	0	0	0	0	0	0	0	0	0	0	0	NA	0	NA	0	0	0	0	0	0	0	0	0	0	0	0	0	0
FORTH	Candidatus_Nanohalococcus	1	1	0	0	0	0	0	0	0	0	0	0	0	NA	0	NA	0	0	0	0	0	0	0	0	0	0	0	0	0	0
FORTH	Candidatus_Nanohalovita	1	1	0	0	0	0	0	0	0	0	0	0	0	NA	0	NA	0	0	0	0	0	0	0	0	0	0	0	0	0	0
THIRD	Candidatus_Nanohalobia	1	1	0	0	0	0	0	0	0	0	0	0	0	NA	0	NA	0	0	0	0	0	0	0	0	0	0	0	0	0	0
FORTH	Candidatus_Nanohalobiales	1	1	0	0	0	0	0	0	0	0	0	0	0	NA	0	NA	0	0	0	0	0	0	0	0	0	0	0	0	0	0
FIFTH	Candidatus_Nanohalobiaceae	1	1	0	0	0	0	0	0	0	0	0	0	0	NA	0	NA	0	0	0	0	0	0	0	0	0	0	0	0	0	0
SIXTH	Candidatus_Nanohalobium	1	1	0	0	0	0	0	0	0	0	0	0	0	NA	0	NA	0	0	0	0	0	0	0	0	0	0	0	0	0	0
SECOND	Candidatus_Thermoplasmatota	49	25	0	0	0	0	0	0	0	0	0	0	0	NA	0	NA	0	0	0	0	0	0	0	0	0	0	0	0	0	0
THIRD	Candidatus_Aciduliprofundum	2	2	0	0	0	0	0	0	0	0	0	0	0	NA	0	NA	0	0	0	0	0	0	0	0	0	0	0	0	0	0
FORTH	unclassified_Aciduliprofundum	1	1	0	0	0	0	0	0	0	0	0	0	0	NA	0	NA	0	0	0	0	0	0	0	0	0	0	0	0	0	0
THIRD	Candidatus_Poseidoniia	4	3	0	0	0	0	0	0	0	0	0	0	0	NA	0	NA	0	0	0	0	0	0	0	0	0	0	0	0	0	0
FORTH	Candidatus_Poseidoniales	4	3	0	0	0	0	0	0	0	0	0	0	0	NA	0	NA	0	0	0	0	0	0	0	0	0	0	0	0	0	0
FIFTH	Candidatus_Poseidoniaceae	2	2	0	0	0	0	0	0	0	0	0	0	0	NA	0	NA	0	0	0	0	0	0	0	0	0	0	0	0	0	0
SIXTH	Candidatus_Poseidonia	2	2	0	0	0	0	0	0	0	0	0	0	0	NA	0	NA	0	0	0	0	0	0	0	0	0	0	0	0	0	0
SEVENTH	unclassified_Candidatus_Poseidonia	1	1	0	0	0	0	0	0	0	0	0	0	0	NA	0	NA	0	0	0	0	0	0	0	0	0	0	0	0	0	0
FIFTH	Candidatus_Thalassarchaeaceae	2	1	0	0	0	0	0	0	0	0	0	0	0	NA	0	NA	0	0	0	0	0	0	0	0	0	0	0	0	0	0
SIXTH	Candidatus_Thalassarchaeum	2	1	0	0	0	0	0	0	0	0	0	0	0	NA	0	NA	0	0	0	0	0	0	0	0	0	0	0	0	0	0
THIRD	Thermoplasmata	43	20	0	0	0	0	0	0	0	0	0	0	0	NA	0	NA	0	0	0	0	0	0	0	0	0	0	0	0	0	0
FORTH	Methanomassiliicoccales	9	5	0	0	0	0	0	0	0	0	0	0	0	NA	0	NA	0	0	0	0	0	0	0	0	0	0	0	0	0	0
FIFTH	Methanomassiliicoccaceae	5	3	0	0	0	0	0	0	0	0	0	0	0	NA	0	NA	0	0	0	0	0	0	0	0	0	0	0	0	0	0
SIXTH	Candidatus_Methanoplasma	1	1	0	0	0	0	0	0	0	0	0	0	0	NA	0	NA	0	0	0	0	0	0	0	0	0	0	0	0	0	0
SIXTH	Methanomassiliicoccus	4	2	0	0	0	0	0	0	0	0	0	0	0	NA	0	NA	0	0	0	0	0	0	0	0	0	0	0	0	0	0
FIFTH	Methanomethylophilaceae	4	2	0	0	0	0	0	0	0	0	0	0	0	NA	0	NA	0	0	0	0	0	0	0	0	0	0	0	0	0	0
SIXTH	Methanomethylophilus	4	2	0	0	0	0	0	0	0	0	0	0	0	NA	0	NA	0	0	0	0	0	0	0	0	0	0	0	0	0	0
SEVENTH	unclassified_Methanomethylophilus	1	1	0	0	0	0	0	0	0	0	0	0	0	NA	0	NA	0	0	0	0	0	0	0	0	0	0	0	0	0	0
FORTH	Thermoplasmatales	34	15	0	0	0	0	0	0	0	0	0	0	0	NA	0	NA	0	0	0	0	0	0	0	0	0	0	0	0	0	0
FIFTH	Cuniculiplasmataceae	2	1	0	0	0	0	0	0	0	0	0	0	0	NA	0	NA	0	0	0	0	0	0	0	0	0	0	0	0	0	0
SIXTH	Cuniculiplasma	2	1	0	0	0	0	0	0	0	0	0	0	0	NA	0	NA	0	0	0	0	0	0	0	0	0	0	0	0	0	0
FIFTH	Ferroplasmaceae	23	8	0	0	0	0	0	0	0	0	0	0	0	NA	0	NA	0	0	0	0	0	0	0	0	0	0	0	0	0	0
SIXTH	Acidiplasma	11	4	0	0	0	0	0	0	0	0	0	0	0	NA	0	NA	0	0	0	0	0	0	0	0	0	0	0	0	0	0
SEVENTH	unclassified_Acidiplasma	7	2	0	0	0	0	0	0	0	0	0	0	0	NA	0	NA	0	0	0	0	0	0	0	0	0	0	0	0	0	0
SIXTH	Ferroplasma	12	4	0	0	0	0	0	0	0	0	0	0	0	NA	0	NA	0	0	0	0	0	0	0	0	0	0	0	0	0	0
SEVENTH	environmental_samples	1	1	0	0	0	0	0	0	0	0	0	0	0	NA	0	NA	0	0	0	0	0	0	0	0	0	0	0	0	0	0
SEVENTH	unclassified_Ferroplasma	4	1	0	0	0	0	0	0	0	0	0	0	0	NA	0	NA	0	0	0	0	0	0	0	0	0	0	0	0	0	0
FIFTH	Picrophilaceae	2	1	0	0	0	0	0	0	0	0	0	0	0	NA	0	NA	0	0	0	0	0	0	0	0	0	0	0	0	0	0
SIXTH	Picrophilus	2	1	0	0	0	0	0	0	0	0	0	0	0	NA	0	NA	0	0	0	0	0	0	0	0	0	0	0	0	0	0
FIFTH	Thermoplasmataceae	5	4	0	0	0	0	0	0	0	0	0	0	0	NA	0	NA	0	0	0	0	0	0	0	0	0	0	0	0	0	0
SIXTH	Thermoplasma	5	4	0	0	0	0	0	0	0	0	0	0	0	NA	0	NA	0	0	0	0	0	0	0	0	0	0	0	0	0	0
SEVENTH	unclassified_Thermoplasma	3	2	0	0	0	0	0	0	0	0	0	0	0	NA	0	NA	0	0	0	0	0	0	0	0	0	0	0	0	0	0
FIFTH	Thermoplasmatales_incertae_sedis	2	1	0	0	0	0	0	0	0	0	0	0	0	NA	0	NA	0	0	0	0	0	0	0	0	0	0	0	0	0	0
SIXTH	Thermogymnomonas	2	1	0	0	0	0	0	0	0	0	0	0	0	NA	0	NA	0	0	0	0	0	0	0	0	0	0	0	0	0	0
SECOND	Euryarchaeota	1845	1009	6	6	0.325203	2	0.198216	0	0	0	0	0	0	NA	0	NA	0	0	0	0	0	0	0	0	0	0	0	0	0	0
THIRD	Archaeoglobi	18	13	0	0	0	0	0	0	0	0	0	0	0	NA	0	NA	0	0	0	0	0	0	0	0	0	0	0	0	0	0
FORTH	Archaeoglobales	18	13	0	0	0	0	0	0	0	0	0	0	0	NA	0	NA	0	0	0	0	0	0	0	0	0	0	0	0	0	0
FIFTH	Archaeoglobaceae	18	13	0	0	0	0	0	0	0	0	0	0	0	NA	0	NA	0	0	0	0	0	0	0	0	0	0	0	0	0	0
SIXTH	Archaeoglobus	13	9	0	0	0	0	0	0	0	0	0	0	0	NA	0	NA	0	0	0	0	0	0	0	0	0	0	0	0	0	0
SEVENTH	unclassified_Archaeoglobus	5	4	0	0	0	0	0	0	0	0	0	0	0	NA	0	NA	0	0	0	0	0	0	0	0	0	0	0	0	0	0
SIXTH	Ferroglobus	2	2	0	0	0	0	0	0	0	0	0	0	0	NA	0	NA	0	0	0	0	0	0	0	0	0	0	0	0	0	0
SEVENTH	unclassified_Ferroglobus	1	1	0	0	0	0	0	0	0	0	0	0	0	NA	0	NA	0	0	0	0	0	0	0	0	0	0	0	0	0	0
SIXTH	Geoglobus	3	2	0	0	0	0	0	0	0	0	0	0	0	NA	0	NA	0	0	0	0	0	0	0	0	0	0	0	0	0	0
THIRD	Candidatus_Methanoliparia	1	1	0	0	0	0	0	0	0	0	0	0	0	NA	0	NA	0	0	0	0	0	0	0	0	0	0	0	0	0	0
FORTH	Candidatus_Methanoliparales	1	1	0	0	0	0	0	0	0	0	0	0	0	NA	0	NA	0	0	0	0	0	0	0	0	0	0	0	0	0	0
FIFTH	Candidatus_Methanoliparaceae	1	1	0	0	0	0	0	0	0	0	0	0	0	NA	0	NA	0	0	0	0	0	0	0	0	0	0	0	0	0	0
SIXTH	Candidatus_Methanoliparum	1	1	0	0	0	0	0	0	0	0	0	0	0	NA	0	NA	0	0	0	0	0	0	0	0	0	0	0	0	0	0
SEVENTH	unclassified_Candidatus_Methanoliparum	1	1	0	0	0	0	0	0	0	0	0	0	0	NA	0	NA	0	0	0	0	0	0	0	0	0	0	0	0	0	0
THIRD	Halobacteria	914	629	0	0	0	0	0	0	0	0	0	0	0	NA	0	NA	0	0	0	0	0	0	0	0	0	0	0	0	0	0
FORTH	Halobacteriales	913	628	0	0	0	0	0	0	0	0	0	0	0	NA	0	NA	0	0	0	0	0	0	0	0	0	0	0	0	0	0
FIFTH	Haladaptataceae	51	43	0	0	0	0	0	0	0	0	0	0	0	NA	0	NA	0	0	0	0	0	0	0	0	0	0	0	0	0	0
SIXTH	Haladaptatus	26	22	0	0	0	0	0	0	0	0	0	0	0	NA	0	NA	0	0	0	0	0	0	0	0	0	0	0	0	0	0
SEVENTH	unclassified_Haladaptatus	15	15	0	0	0	0	0	0	0	0	0	0	0	NA	0	NA	0	0	0	0	0	0	0	0	0	0	0	0	0	0
SIXTH	Halomicrococcus	1	1	0	0	0	0	0	0	0	0	0	0	0	NA	0	NA	0	0	0	0	0	0	0	0	0	0	0	0	0	0
SIXTH	Halorussus	24	20	0	0	0	0	0	0	0	0	0	0	0	NA	0	NA	0	0	0	0	0	0	0	0	0	0	0	0	0	0
SEVENTH	unclassified_Halorussus	3	3	0	0	0	0	0	0	0	0	0	0	0	NA	0	NA	0	0	0	0	0	0	0	0	0	0	0	0	0	0
FIFTH	Haloarculaceae	209	146	0	0	0	0	0	0	0	0	0	0	0	NA	0	NA	0	0	0	0	0	0	0	0	0	0	0	0	0	0
SIXTH	Halapricum	8	4	0	0	0	0	0	0	0	0	0	0	0	NA	0	NA	0	0	0	0	0	0	0	0	0	0	0	0	0	0
SEVENTH	unclassified_Halapricum	1	1	0	0	0	0	0	0	0	0	0	0	0	NA	0	NA	0	0	0	0	0	0	0	0	0	0	0	0	0	0
SIXTH	Haloarcula	85	60	0	0	0	0	0	0	0	0	0	0	0	NA	0	NA	0	0	0	0	0	0	0	0	0	0	0	0	0	0
SEVENTH	unclassified_Haloarcula	29	29	0	0	0	0	0	0	0	0	0	0	0	NA	0	NA	0	0	0	0	0	0	0	0	0	0	0	0	0	0
SIXTH	Halocatena	7	3	0	0	0	0	0	0	0	0	0	0	0	NA	0	NA	0	0	0	0	0	0	0	0	0	0	0	0	0	0
SIXTH	Halococcoides	1	1	0	0	0	0	0	0	0	0	0	0	0	NA	0	NA	0	0	0	0	0	0	0	0	0	0	0	0	0	0
SIXTH	Haloglomus	4	4	0	0	0	0	0	0	0	0	0	0	0	NA	0	NA	0	0	0	0	0	0	0	0	0	0	0	0	0	0
SIXTH	Halomarina	12	7	0	0	0	0	0	0	0	0	0	0	0	NA	0	NA	0	0	0	0	0	0	0	0	0	0	0	0	0	0
SIXTH	Halomicrobium	13	9	0	0	0	0	0	0	0	0	0	0	0	NA	0	NA	0	0	0	0	0	0	0	0	0	0	0	0	0	0
SEVENTH	unclassified_Halomicrobium	4	4	0	0	0	0	0	0	0	0	0	0	0	NA	0	NA	0	0	0	0	0	0	0	0	0	0	0	0	0	0
SIXTH	Halorarius	2	2	0	0	0	0	0	0	0	0	0	0	0	NA	0	NA	0	0	0	0	0	0	0	0	0	0	0	0	0	0
SIXTH	Halorhabdus	10	9	0	0	0	0	0	0	0	0	0	0	0	NA	0	NA	0	0	0	0	0	0	0	0	0	0	0	0	0	0
SEVENTH	unclassified_Halorhabdus	4	4	0	0	0	0	0	0	0	0	0	0	0	NA	0	NA	0	0	0	0	0	0	0	0	0	0	0	0	0	0
SIXTH	Halorientalis	13	10	0	0	0	0	0	0	0	0	0	0	0	NA	0	NA	0	0	0	0	0	0	0	0	0	0	0	0	0	0
SEVENTH	unclassified_Halorientalis	3	3	0	0	0	0	0	0	0	0	0	0	0	NA	0	NA	0	0	0	0	0	0	0	0	0	0	0	0	0	0
SIXTH	Halosegnis	10	4	0	0	0	0	0	0	0	0	0	0	0	NA	0	NA	0	0	0	0	0	0	0	0	0	0	0	0	0	0
SEVENTH	unclassified_Halosegnis	1	1	0	0	0	0	0	0	0	0	0	0	0	NA	0	NA	0	0	0	0	0	0	0	0	0	0	0	0	0	0
SIXTH	Halosimplex	8	7	0	0	0	0	0	0	0	0	0	0	0	NA	0	NA	0	0	0	0	0	0	0	0	0	0	0	0	0	0
SIXTH	Halovenus	8	5	0	0	0	0	0	0	0	0	0	0	0	NA	0	NA	0	0	0	0	0	0	0	0	0	0	0	0	0	0
SEVENTH	unclassified_Halovenus	1	1	0	0	0	0	0	0	0	0	0	0	0	NA	0	NA	0	0	0	0	0	0	0	0	0	0	0	0	0	0
SIXTH	Natronomonas	17	12	0	0	0	0	0	0	0	0	0	0	0	NA	0	NA	0	0	0	0	0	0	0	0	0	0	0	0	0	0
SEVENTH	unclassified_Natronomonas	7	4	0	0	0	0	0	0	0	0	0	0	0	NA	0	NA	0	0	0	0	0	0	0	0	0	0	0	0	0	0
SIXTH	Salinibaculum	4	4	0	0	0	0	0	0	0	0	0	0	0	NA	0	NA	0	0	0	0	0	0	0	0	0	0	0	0	0	0
SEVENTH	unclassified_Salinibaculum	4	4	0	0	0	0	0	0	0	0	0	0	0	NA	0	NA	0	0	0	0	0	0	0	0	0	0	0	0	0	0
SIXTH	Salinirubellus	6	4	0	0	0	0	0	0	0	0	0	0	0	NA	0	NA	0	0	0	0	0	0	0	0	0	0	0	0	0	0
SEVENTH	unclassified_Salinirubellus	3	3	0	0	0	0	0	0	0	0	0	0	0	NA	0	NA	0	0	0	0	0	0	0	0	0	0	0	0	0	0
SIXTH	Salinirussus	1	1	0	0	0	0	0	0	0	0	0	0	0	NA	0	NA	0	0	0	0	0	0	0	0	0	0	0	0	0	0
FIFTH	Halobacteriaceae	76	37	0	0	0	0	0	0	0	0	0	0	0	NA	0	NA	0	0	0	0	0	0	0	0	0	0	0	0	0	0
SIXTH	Actinarchaeum	1	1	0	0	0	0	0	0	0	0	0	0	0	NA	0	NA	0	0	0	0	0	0	0	0	0	0	0	0	0	0
SIXTH	Halanaeroarchaeum	3	2	0	0	0	0	0	0	0	0	0	0	0	NA	0	NA	0	0	0	0	0	0	0	0	0	0	0	0	0	0
SEVENTH	unclassified_Halanaeroarchaeum	1	1	0	0	0	0	0	0	0	0	0	0	0	NA	0	NA	0	0	0	0	0	0	0	0	0	0	0	0	0	0
SIXTH	Halarchaeum	9	7	0	0	0	0	0	0	0	0	0	0	0	NA	0	NA	0	0	0	0	0	0	0	0	0	0	0	0	0	0
SEVENTH	unclassified_Halarchaeum	1	1	0	0	0	0	0	0	0	0	0	0	0	NA	0	NA	0	0	0	0	0	0	0	0	0	0	0	0	0	0
SIXTH	Halobacterium	50	19	0	0	0	0	0	0	0	0	0	0	0	NA	0	NA	0	0	0	0	0	0	0	0	0	0	0	0	0	0
SEVENTH	unclassified_Halobacterium	10	10	0	0	0	0	0	0	0	0	0	0	0	NA	0	NA	0	0	0	0	0	0	0	0	0	0	0	0	0	0
SIXTH	Halocalculus	1	1	0	0	0	0	0	0	0	0	0	0	0	NA	0	NA	0	0	0	0	0	0	0	0	0	0	0	0	0	0
SIXTH	Halodesulfurarchaeum	5	3	0	0	0	0	0	0	0	0	0	0	0	NA	0	NA	0	0	0	0	0	0	0	0	0	0	0	0	0	0
SEVENTH	unclassified_Halodesulfurarchaeum	3	2	0	0	0	0	0	0	0	0	0	0	0	NA	0	NA	0	0	0	0	0	0	0	0	0	0	0	0	0	0
SIXTH	Halospeciosus	3	1	0	0	0	0	0	0	0	0	0	0	0	NA	0	NA	0	0	0	0	0	0	0	0	0	0	0	0	0	0
SIXTH	Salarchaeum	4	3	0	0	0	0	0	0	0	0	0	0	0	NA	0	NA	0	0	0	0	0	0	0	0	0	0	0	0	0	0
SEVENTH	unclassified_Salarchaeum	2	2	0	0	0	0	0	0	0	0	0	0	0	NA	0	NA	0	0	0	0	0	0	0	0	0	0	0	0	0	0
FIFTH	Halococcaceae	28	23	0	0	0	0	0	0	0	0	0	0	0	NA	0	NA	0	0	0	0	0	0	0	0	0	0	0	0	0	0
SIXTH	Halalkalicoccus	14	11	0	0	0	0	0	0	0	0	0	0	0	NA	0	NA	0	0	0	0	0	0	0	0	0	0	0	0	0	0
SEVENTH	unclassified_Halalkalicoccus	7	7	0	0	0	0	0	0	0	0	0	0	0	NA	0	NA	0	0	0	0	0	0	0	0	0	0	0	0	0	0
SIXTH	Halococcus	14	12	0	0	0	0	0	0	0	0	0	0	0	NA	0	NA	0	0	0	0	0	0	0	0	0	0	0	0	0	0
SEVENTH	unclassified_Halococcus	2	2	0	0	0	0	0	0	0	0	0	0	0	NA	0	NA	0	0	0	0	0	0	0	0	0	0	0	0	0	0
FIFTH	Haloferacaceae	367	234	0	0	0	0	0	0	0	0	0	0	0	NA	0	NA	0	0	0	0	0	0	0	0	0	0	0	0	0	0
SIXTH	Candidatus_Halobonum	1	1	0	0	0	0	0	0	0	0	0	0	0	NA	0	NA	0	0	0	0	0	0	0	0	0	0	0	0	0	0
SIXTH	Halalkaliarchaeum	3	3	0	0	0	0	0	0	0	0	0	0	0	NA	0	NA	0	0	0	0	0	0	0	0	0	0	0	0	0	0
SEVENTH	unclassified_Halalkaliarchaeum	2	2	0	0	0	0	0	0	0	0	0	0	0	NA	0	NA	0	0	0	0	0	0	0	0	0	0	0	0	0	0
SIXTH	Halalkalirubrum	1	1	0	0	0	0	0	0	0	0	0	0	0	NA	0	NA	0	0	0	0	0	0	0	0	0	0	0	0	0	0
SIXTH	Halegenticoccus	2	2	0	0	0	0	0	0	0	0	0	0	0	NA	0	NA	0	0	0	0	0	0	0	0	0	0	0	0	0	0
SIXTH	Halobaculum	20	15	0	0	0	0	0	0	0	0	0	0	0	NA	0	NA	0	0	0	0	0	0	0	0	0	0	0	0	0	0
SEVENTH	unclassified_Halobaculum	5	5	0	0	0	0	0	0	0	0	0	0	0	NA	0	NA	0	0	0	0	0	0	0	0	0	0	0	0	0	0
SIXTH	Halobellus	23	17	0	0	0	0	0	0	0	0	0	0	0	NA	0	NA	0	0	0	0	0	0	0	0	0	0	0	0	0	0
SEVENTH	unclassified_Halobellus	8	8	0	0	0	0	0	0	0	0	0	0	0	NA	0	NA	0	0	0	0	0	0	0	0	0	0	0	0	0	0
SIXTH	Halobium	3	1	0	0	0	0	0	0	0	0	0	0	0	NA	0	NA	0	0	0	0	0	0	0	0	0	0	0	0	0	0
SIXTH	Haloferax	66	41	0	0	0	0	0	0	0	0	0	0	0	NA	0	NA	0	0	0	0	0	0	0	0	0	0	0	0	0	0
SEVENTH	unclassified_Haloferax	24	24	0	0	0	0	0	0	0	0	0	0	0	NA	0	NA	0	0	0	0	0	0	0	0	0	0	0	0	0	0
SIXTH	Halogeometricum	11	7	0	0	0	0	0	0	0	0	0	0	0	NA	0	NA	0	0	0	0	0	0	0	0	0	0	0	0	0	0
SEVENTH	unclassified_Halogeometricum	3	3	0	0	0	0	0	0	0	0	0	0	0	NA	0	NA	0	0	0	0	0	0	0	0	0	0	0	0	0	0
SIXTH	Halogranum	4	3	0	0	0	0	0	0	0	0	0	0	0	NA	0	NA	0	0	0	0	0	0	0	0	0	0	0	0	0	0
SIXTH	Halohasta	5	3	0	0	0	0	0	0	0	0	0	0	0	NA	0	NA	0	0	0	0	0	0	0	0	0	0	0	0	0	0
SIXTH	Halolamina	14	9	0	0	0	0	0	0	0	0	0	0	0	NA	0	NA	0	0	0	0	0	0	0	0	0	0	0	0	0	0
SEVENTH	unclassified_Halolamina	4	3	0	0	0	0	0	0	0	0	0	0	0	NA	0	NA	0	0	0	0	0	0	0	0	0	0	0	0	0	0
SIXTH	Halonotius	5	5	0	0	0	0	0	0	0	0	0	0	0	NA	0	NA	0	0	0	0	0	0	0	0	0	0	0	0	0	0
SEVENTH	unclassified_Halonotius	1	1	0	0	0	0	0	0	0	0	0	0	0	NA	0	NA	0	0	0	0	0	0	0	0	0	0	0	0	0	0
SIXTH	Haloparvum	1	1	0	0	0	0	0	0	0	0	0	0	0	NA	0	NA	0	0	0	0	0	0	0	0	0	0	0	0	0	0
SIXTH	Halopelagius	4	3	0	0	0	0	0	0	0	0	0	0	0	NA	0	NA	0	0	0	0	0	0	0	0	0	0	0	0	0	0
SIXTH	Halopenitus	7	5	0	0	0	0	0	0	0	0	0	0	0	NA	0	NA	0	0	0	0	0	0	0	0	0	0	0	0	0	0
SEVENTH	unclassified_Halopenitus	2	2	0	0	0	0	0	0	0	0	0	0	0	NA	0	NA	0	0	0	0	0	0	0	0	0	0	0	0	0	0
SIXTH	Haloplanus	20	15	0	0	0	0	0	0	0	0	0	0	0	NA	0	NA	0	0	0	0	0	0	0	0	0	0	0	0	0	0
SEVENTH	unclassified_Haloplanus	6	6	0	0	0	0	0	0	0	0	0	0	0	NA	0	NA	0	0	0	0	0	0	0	0	0	0	0	0	0	0
SIXTH	Haloprofundus	6	6	0	0	0	0	0	0	0	0	0	0	0	NA	0	NA	0	0	0	0	0	0	0	0	0	0	0	0	0	0
SEVENTH	unclassified_Haloprofundus	1	1	0	0	0	0	0	0	0	0	0	0	0	NA	0	NA	0	0	0	0	0	0	0	0	0	0	0	0	0	0
SIXTH	Haloquadratum	7	1	0	0	0	0	0	0	0	0	0	0	0	NA	0	NA	0	0	0	0	0	0	0	0	0	0	0	0	0	0
SIXTH	Halorarum	2	2	0	0	0	0	0	0	0	0	0	0	0	NA	0	NA	0	0	0	0	0	0	0	0	0	0	0	0	0	0
SIXTH	Halorubrum	151	85	0	0	0	0	0	0	0	0	0	0	0	NA	0	NA	0	0	0	0	0	0	0	0	0	0	0	0	0	0
SEVENTH	environmental_samples	1	1	0	0	0	0	0	0	0	0	0	0	0	NA	0	NA	0	0	0	0	0	0	0	0	0	0	0	0	0	0
SEVENTH	unclassified_Halorubrum	44	42	0	0	0	0	0	0	0	0	0	0	0	NA	0	NA	0	0	0	0	0	0	0	0	0	0	0	0	0	0
SIXTH	Natronocalculus	1	1	0	0	0	0	0	0	0	0	0	0	0	NA	0	NA	0	0	0	0	0	0	0	0	0	0	0	0	0	0
SIXTH	Salinigranum	8	6	0	0	0	0	0	0	0	0	0	0	0	NA	0	NA	0	0	0	0	0	0	0	0	0	0	0	0	0	0
SEVENTH	unclassified_Salinigranum	2	2	0	0	0	0	0	0	0	0	0	0	0	NA	0	NA	0	0	0	0	0	0	0	0	0	0	0	0	0	0
SIXTH	Salinirubrum	2	1	0	0	0	0	0	0	0	0	0	0	0	NA	0	NA	0	0	0	0	0	0	0	0	0	0	0	0	0	0
FIFTH	Halorubellaceae	15	10	0	0	0	0	0	0	0	0	0	0	0	NA	0	NA	0	0	0	0	0	0	0	0	0	0	0	0	0	0
SIXTH	Haloarchaeobius	10	6	0	0	0	0	0	0	0	0	0	0	0	NA	0	NA	0	0	0	0	0	0	0	0	0	0	0	0	0	0
SEVENTH	unclassified_Haloarchaeobius	2	2	0	0	0	0	0	0	0	0	0	0	0	NA	0	NA	0	0	0	0	0	0	0	0	0	0	0	0	0	0
SIXTH	Halorubellus	5	4	0	0	0	0	0	0	0	0	0	0	0	NA	0	NA	0	0	0	0	0	0	0	0	0	0	0	0	0	0
SEVENTH	unclassified_Halorubellus	2	2	0	0	0	0	0	0	0	0	0	0	0	NA	0	NA	0	0	0	0	0	0	0	0	0	0	0	0	0	0
FIFTH	Natrialbaceae	150	119	0	0	0	0	0	0	0	0	0	0	0	NA	0	NA	0	0	0	0	0	0	0	0	0	0	0	0	0	0
SIXTH	Halobiforma	4	3	0	0	0	0	0	0	0	0	0	0	0	NA	0	NA	0	0	0	0	0	0	0	0	0	0	0	0	0	0
SIXTH	Halomontanus	2	1	0	0	0	0	0	0	0	0	0	0	0	NA	0	NA	0	0	0	0	0	0	0	0	0	0	0	0	0	0
SIXTH	Halopiger	4	4	0	0	0	0	0	0	0	0	0	0	0	NA	0	NA	0	0	0	0	0	0	0	0	0	0	0	0	0	0
SIXTH	Halosolutus	4	3	0	0	0	0	0	0	0	0	0	0	0	NA	0	NA	0	0	0	0	0	0	0	0	0	0	0	0	0	0
SIXTH	Halostagnicola	6	6	0	0	0	0	0	0	0	0	0	0	0	NA	0	NA	0	0	0	0	0	0	0	0	0	0	0	0	0	0
SEVENTH	unclassified_Halostagnicola	4	4	0	0	0	0	0	0	0	0	0	0	0	NA	0	NA	0	0	0	0	0	0	0	0	0	0	0	0	0	0
SIXTH	Haloterrigena	9	7	0	0	0	0	0	0	0	0	0	0	0	NA	0	NA	0	0	0	0	0	0	0	0	0	0	0	0	0	0
SEVENTH	unclassified_Haloterrigena	2	2	0	0	0	0	0	0	0	0	0	0	0	NA	0	NA	0	0	0	0	0	0	0	0	0	0	0	0	0	0
SIXTH	Halovivax	7	6	0	0	0	0	0	0	0	0	0	0	0	NA	0	NA	0	0	0	0	0	0	0	0	0	0	0	0	0	0
SEVENTH	unclassified_Halovivax	1	1	0	0	0	0	0	0	0	0	0	0	0	NA	0	NA	0	0	0	0	0	0	0	0	0	0	0	0	0	0
SIXTH	Natrarchaeobaculum	4	3	0	0	0	0	0	0	0	0	0	0	0	NA	0	NA	0	0	0	0	0	0	0	0	0	0	0	0	0	0
SEVENTH	unclassified_Natrarchaeobaculum	1	1	0	0	0	0	0	0	0	0	0	0	0	NA	0	NA	0	0	0	0	0	0	0	0	0	0	0	0	0	0
SIXTH	Natrarchaeobius	4	3	0	0	0	0	0	0	0	0	0	0	0	NA	0	NA	0	0	0	0	0	0	0	0	0	0	0	0	0	0
SEVENTH	unclassified_Natrarchaeobius	1	1	0	0	0	0	0	0	0	0	0	0	0	NA	0	NA	0	0	0	0	0	0	0	0	0	0	0	0	0	0
SIXTH	Natrialba	11	10	0	0	0	0	0	0	0	0	0	0	0	NA	0	NA	0	0	0	0	0	0	0	0	0	0	0	0	0	0
SEVENTH	unclassified_Natrialba	3	3	0	0	0	0	0	0	0	0	0	0	0	NA	0	NA	0	0	0	0	0	0	0	0	0	0	0	0	0	0
SIXTH	Natribaculum	2	1	0	0	0	0	0	0	0	0	0	0	0	NA	0	NA	0	0	0	0	0	0	0	0	0	0	0	0	0	0
SIXTH	Natrinema	42	31	0	0	0	0	0	0	0	0	0	0	0	NA	0	NA	0	0	0	0	0	0	0	0	0	0	0	0	0	0
SEVENTH	unclassified_Natrinema	9	9	0	0	0	0	0	0	0	0	0	0	0	NA	0	NA	0	0	0	0	0	0	0	0	0	0	0	0	0	0
SIXTH	Natronobacterium	5	2	0	0	0	0	0	0	0	0	0	0	0	NA	0	NA	0	0	0	0	0	0	0	0	0	0	0	0	0	0
SIXTH	Natronobeatus	1	1	0	0	0	0	0	0	0	0	0	0	0	NA	0	NA	0	0	0	0	0	0	0	0	0	0	0	0	0	0
SIXTH	Natronobiforma	1	1	0	0	0	0	0	0	0	0	0	0	0	NA	0	NA	0	0	0	0	0	0	0	0	0	0	0	0	0	0
SIXTH	Natronococcus	10	10	0	0	0	0	0	0	0	0	0	0	0	NA	0	NA	0	0	0	0	0	0	0	0	0	0	0	0	0	0
SEVENTH	unclassified_Natronococcus	6	6	0	0	0	0	0	0	0	0	0	0	0	NA	0	NA	0	0	0	0	0	0	0	0	0	0	0	0	0	0
SIXTH	Natronoglomus	2	1	0	0	0	0	0	0	0	0	0	0	0	NA	0	NA	0	0	0	0	0	0	0	0	0	0	0	0	0	0
SIXTH	Natronolimnobius	2	2	0	0	0	0	0	0	0	0	0	0	0	NA	0	NA	0	0	0	0	0	0	0	0	0	0	0	0	0	0
SEVENTH	unclassified_Natronolimnobius	1	1	0	0	0	0	0	0	0	0	0	0	0	NA	0	NA	0	0	0	0	0	0	0	0	0	0	0	0	0	0
SIXTH	Natronolimnohabitans	2	2	0	0	0	0	0	0	0	0	0	0	0	NA	0	NA	0	0	0	0	0	0	0	0	0	0	0	0	0	0
SEVENTH	unclassified_Natronolimnohabitans	1	1	0	0	0	0	0	0	0	0	0	0	0	NA	0	NA	0	0	0	0	0	0	0	0	0	0	0	0	0	0
SIXTH	Natrononativus	1	1	0	0	0	0	0	0	0	0	0	0	0	NA	0	NA	0	0	0	0	0	0	0	0	0	0	0	0	0	0
SIXTH	Natronorubrum	15	11	0	0	0	0	0	0	0	0	0	0	0	NA	0	NA	0	0	0	0	0	0	0	0	0	0	0	0	0	0
SEVENTH	unclassified_Natronorubrum	1	1	0	0	0	0	0	0	0	0	0	0	0	NA	0	NA	0	0	0	0	0	0	0	0	0	0	0	0	0	0
SIXTH	Natronosalvus	6	6	0	0	0	0	0	0	0	0	0	0	0	NA	0	NA	0	0	0	0	0	0	0	0	0	0	0	0	0	0
SIXTH	Salinadaptatus	1	1	0	0	0	0	0	0	0	0	0	0	0	NA	0	NA	0	0	0	0	0	0	0	0	0	0	0	0	0	0
SIXTH	Salinilacihabitans	1	1	0	0	0	0	0	0	0	0	0	0	0	NA	0	NA	0	0	0	0	0	0	0	0	0	0	0	0	0	0
SIXTH	Saliphagus	4	2	0	0	0	0	0	0	0	0	0	0	0	NA	0	NA	0	0	0	0	0	0	0	0	0	0	0	0	0	0
SEVENTH	unclassified_Saliphagus	1	1	0	0	0	0	0	0	0	0	0	0	0	NA	0	NA	0	0	0	0	0	0	0	0	0	0	0	0	0	0
FIFTH	Natronoarchaeaceae	17	16	0	0	0	0	0	0	0	0	0	0	0	NA	0	NA	0	0	0	0	0	0	0	0	0	0	0	0	0	0
SIXTH	Halostella	6	6	0	0	0	0	0	0	0	0	0	0	0	NA	0	NA	0	0	0	0	0	0	0	0	0	0	0	0	0	0
SEVENTH	unclassified_Halostella	2	2	0	0	0	0	0	0	0	0	0	0	0	NA	0	NA	0	0	0	0	0	0	0	0	0	0	0	0	0	0
SIXTH	Natranaeroarchaeum	2	2	0	0	0	0	0	0	0	0	0	0	0	NA	0	NA	0	0	0	0	0	0	0	0	0	0	0	0	0	0
SIXTH	Natronoarchaeum	6	5	0	0	0	0	0	0	0	0	0	0	0	NA	0	NA	0	0	0	0	0	0	0	0	0	0	0	0	0	0
SEVENTH	unclassified_Natronoarchaeum	2	2	0	0	0	0	0	0	0	0	0	0	0	NA	0	NA	0	0	0	0	0	0	0	0	0	0	0	0	0	0
SIXTH	Salinarchaeum	3	3	0	0	0	0	0	0	0	0	0	0	0	NA	0	NA	0	0	0	0	0	0	0	0	0	0	0	0	0	0
SEVENTH	unclassified_Salinarchaeum	2	2	0	0	0	0	0	0	0	0	0	0	0	NA	0	NA	0	0	0	0	0	0	0	0	0	0	0	0	0	0
FORTH	Halorutilales	1	1	0	0	0	0	0	0	0	0	0	0	0	NA	0	NA	0	0	0	0	0	0	0	0	0	0	0	0	0	0
FIFTH	Halorutilaceae	1	1	0	0	0	0	0	0	0	0	0	0	0	NA	0	NA	0	0	0	0	0	0	0	0	0	0	0	0	0	0
SIXTH	Halorutilus	1	1	0	0	0	0	0	0	0	0	0	0	0	NA	0	NA	0	0	0	0	0	0	0	0	0	0	0	0	0	0
THIRD	Methanobacteria	338	73	0	0	0	0	0	0	0	0	0	0	0	NA	0	NA	0	0	0	0	0	0	0	0	0	0	0	0	0	0
FORTH	Methanobacteriales	338	73	0	0	0	0	0	0	0	0	0	0	0	NA	0	NA	0	0	0	0	0	0	0	0	0	0	0	0	0	0
FIFTH	Methanobacteriaceae	338	73	0	0	0	0	0	0	0	0	0	0	0	NA	0	NA	0	0	0	0	0	0	0	0	0	0	0	0	0	0
SIXTH	Methanobacterium	43	22	0	0	0	0	0	0	0	0	0	0	0	NA	0	NA	0	0	0	0	0	0	0	0	0	0	0	0	0	0
SEVENTH	environmental_samples	3	1	0	0	0	0	0	0	0	0	0	0	0	NA	0	NA	0	0	0	0	0	0	0	0	0	0	0	0	0	0
SEVENTH	unclassified_Methanobacterium	12	7	0	0	0	0	0	0	0	0	0	0	0	NA	0	NA	0	0	0	0	0	0	0	0	0	0	0	0	0	0
SIXTH	Methanobrevibacter	243	27	0	0	0	0	0	0	0	0	0	0	0	NA	0	NA	0	0	0	0	0	0	0	0	0	0	0	0	0	0
SEVENTH	environmental_samples	63	1	0	0	0	0	0	0	0	0	0	0	0	NA	0	NA	0	0	0	0	0	0	0	0	0	0	0	0	0	0
SEVENTH	unclassified_Methanobrevibacter	42	12	0	0	0	0	0	0	0	0	0	0	0	NA	0	NA	0	0	0	0	0	0	0	0	0	0	0	0	0	0
SIXTH	Methanosphaera	29	10	0	0	0	0	0	0	0	0	0	0	0	NA	0	NA	0	0	0	0	0	0	0	0	0	0	0	0	0	0
SEVENTH	environmental_samples	6	1	0	0	0	0	0	0	0	0	0	0	0	NA	0	NA	0	0	0	0	0	0	0	0	0	0	0	0	0	0
SEVENTH	unclassified_Methanosphaera	11	6	0	0	0	0	0	0	0	0	0	0	0	NA	0	NA	0	0	0	0	0	0	0	0	0	0	0	0	0	0
SIXTH	Methanothermobacter	23	14	0	0	0	0	0	0	0	0	0	0	0	NA	0	NA	0	0	0	0	0	0	0	0	0	0	0	0	0	0
SEVENTH	unclassified_Methanothermobacter	10	9	0	0	0	0	0	0	0	0	0	0	0	NA	0	NA	0	0	0	0	0	0	0	0	0	0	0	0	0	0
THIRD	Methanococci	54	20	0	0	0	0	0	0	0	0	0	0	0	NA	0	NA	0	0	0	0	0	0	0	0	0	0	0	0	0	0
FORTH	Methanococcales	54	20	0	0	0	0	0	0	0	0	0	0	0	NA	0	NA	0	0	0	0	0	0	0	0	0	0	0	0	0	0
FIFTH	Methanocaldococcaceae	12	11	0	0	0	0	0	0	0	0	0	0	0	NA	0	NA	0	0	0	0	0	0	0	0	0	0	0	0	0	0
SIXTH	Methanocaldococcus	10	9	0	0	0	0	0	0	0	0	0	0	0	NA	0	NA	0	0	0	0	0	0	0	0	0	0	0	0	0	0
SEVENTH	unclassified_Methanocaldococcus	2	2	0	0	0	0	0	0	0	0	0	0	0	NA	0	NA	0	0	0	0	0	0	0	0	0	0	0	0	0	0
SIXTH	Methanotorris	2	2	0	0	0	0	0	0	0	0	0	0	0	NA	0	NA	0	0	0	0	0	0	0	0	0	0	0	0	0	0
FIFTH	Methanococcaceae	40	7	0	0	0	0	0	0	0	0	0	0	0	NA	0	NA	0	0	0	0	0	0	0	0	0	0	0	0	0	0
SIXTH	Methanococcus	35	4	0	0	0	0	0	0	0	0	0	0	0	NA	0	NA	0	0	0	0	0	0	0	0	0	0	0	0	0	0
SIXTH	Methanothermococcus	5	3	0	0	0	0	0	0	0	0	0	0	0	NA	0	NA	0	0	0	0	0	0	0	0	0	0	0	0	0	0
SEVENTH	unclassified_Methanothermococcus	2	1	0	0	0	0	0	0	0	0	0	0	0	NA	0	NA	0	0	0	0	0	0	0	0	0	0	0	0	0	0
FIFTH	Methanococcales_incertae_sedis	2	2	0	0	0	0	0	0	0	0	0	0	0	NA	0	NA	0	0	0	0	0	0	0	0	0	0	0	0	0	0
SIXTH	Methanofervidicoccus	2	2	0	0	0	0	0	0	0	0	0	0	0	NA	0	NA	0	0	0	0	0	0	0	0	0	0	0	0	0	0
SEVENTH	unclassified_Methanofervidicoccus	1	1	0	0	0	0	0	0	0	0	0	0	0	NA	0	NA	0	0	0	0	0	0	0	0	0	0	0	0	0	0
THIRD	Methanomicrobia	385	191	5	5	1.2987	1	0.52356	0	0	0	0	0	0	NA	0	NA	0	0	0	0	0	0	0	0	0	0	0	0	0	0
FORTH	Methanocellales	7	5	0	0	0	0	0	0	0	0	0	0	0	NA	0	NA	0	0	0	0	0	0	0	0	0	0	0	0	0	0
FIFTH	Methanocellaceae	7	5	0	0	0	0	0	0	0	0	0	0	0	NA	0	NA	0	0	0	0	0	0	0	0	0	0	0	0	0	0
SIXTH	Methanocella	6	4	0	0	0	0	0	0	0	0	0	0	0	NA	0	NA	0	0	0	0	0	0	0	0	0	0	0	0	0	0
SEVENTH	unclassified_Methanocella	1	1	0	0	0	0	0	0	0	0	0	0	0	NA	0	NA	0	0	0	0	0	0	0	0	0	0	0	0	0	0
SIXTH	Methanooceanicella	1	1	0	0	0	0	0	0	0	0	0	0	0	NA	0	NA	0	0	0	0	0	0	0	0	0	0	0	0	0	0
FORTH	Methanomicrobiales	143	93	0	0	0	0	0	0	0	0	0	0	0	NA	0	NA	0	0	0	0	0	0	0	0	0	0	0	0	0	0
FIFTH	Methanocalculaceae	11	8	0	0	0	0	0	0	0	0	0	0	0	NA	0	NA	0	0	0	0	0	0	0	0	0	0	0	0	0	0
SIXTH	Methanocalculus	11	8	0	0	0	0	0	0	0	0	0	0	0	NA	0	NA	0	0	0	0	0	0	0	0	0	0	0	0	0	0
SEVENTH	unclassified_Methanocalculus	7	4	0	0	0	0	0	0	0	0	0	0	0	NA	0	NA	0	0	0	0	0	0	0	0	0	0	0	0	0	0
FIFTH	Methanocorpusculaceae	11	10	0	0	0	0	0	0	0	0	0	0	0	NA	0	NA	0	0	0	0	0	0	0	0	0	0	0	0	0	0
SIXTH	Methanocorpusculum	9	8	0	0	0	0	0	0	0	0	0	0	0	NA	0	NA	0	0	0	0	0	0	0	0	0	0	0	0	0	0
SEVENTH	environmental_samples	1	1	0	0	0	0	0	0	0	0	0	0	0	NA	0	NA	0	0	0	0	0	0	0	0	0	0	0	0	0	0
SEVENTH	unclassified_Methanocorpusculum	3	2	0	0	0	0	0	0	0	0	0	0	0	NA	0	NA	0	0	0	0	0	0	0	0	0	0	0	0	0	0
SIXTH	Methanorbis	2	2	0	0	0	0	0	0	0	0	0	0	0	NA	0	NA	0	0	0	0	0	0	0	0	0	0	0	0	0	0
FIFTH	Methanomicrobiaceae	85	60	0	0	0	0	0	0	0	0	0	0	0	NA	0	NA	0	0	0	0	0	0	0	0	0	0	0	0	0	0
SIXTH	Methanoculleus	61	36	0	0	0	0	0	0	0	0	0	0	0	NA	0	NA	0	0	0	0	0	0	0	0	0	0	0	0	0	0
SEVENTH	environmental_samples	1	1	0	0	0	0	0	0	0	0	0	0	0	NA	0	NA	0	0	0	0	0	0	0	0	0	0	0	0	0	0
SEVENTH	unclassified_Methanoculleus	38	20	0	0	0	0	0	0	0	0	0	0	0	NA	0	NA	0	0	0	0	0	0	0	0	0	0	0	0	0	0
SIXTH	Methanofollis	10	10	0	0	0	0	0	0	0	0	0	0	0	NA	0	NA	0	0	0	0	0	0	0	0	0	0	0	0	0	0
SEVENTH	environmental_samples	1	1	0	0	0	0	0	0	0	0	0	0	0	NA	0	NA	0	0	0	0	0	0	0	0	0	0	0	0	0	0
SEVENTH	unclassified_Methanofollis	3	3	0	0	0	0	0	0	0	0	0	0	0	NA	0	NA	0	0	0	0	0	0	0	0	0	0	0	0	0	0
SIXTH	Methanogenium	5	5	0	0	0	0	0	0	0	0	0	0	0	NA	0	NA	0	0	0	0	0	0	0	0	0	0	0	0	0	0
SEVENTH	unclassified_Methanogenium	2	2	0	0	0	0	0	0	0	0	0	0	0	NA	0	NA	0	0	0	0	0	0	0	0	0	0	0	0	0	0
SIXTH	Methanolacinia	2	2	0	0	0	0	0	0	0	0	0	0	0	NA	0	NA	0	0	0	0	0	0	0	0	0	0	0	0	0	0
SIXTH	Methanomicrobium	3	3	0	0	0	0	0	0	0	0	0	0	0	NA	0	NA	0	0	0	0	0	0	0	0	0	0	0	0	0	0
SEVENTH	unclassified_Methanomicrobium	1	1	0	0	0	0	0	0	0	0	0	0	0	NA	0	NA	0	0	0	0	0	0	0	0	0	0	0	0	0	0
SIXTH	Methanoplanus	3	3	0	0	0	0	0	0	0	0	0	0	0	NA	0	NA	0	0	0	0	0	0	0	0	0	0	0	0	0	0
SEVENTH	unclassified_Methanoplanus	1	1	0	0	0	0	0	0	0	0	0	0	0	NA	0	NA	0	0	0	0	0	0	0	0	0	0	0	0	0	0
SIXTH	Methanovulcanius	1	1	0	0	0	0	0	0	0	0	0	0	0	NA	0	NA	0	0	0	0	0	0	0	0	0	0	0	0	0	0
FIFTH	Methanoregulaceae	19	9	0	0	0	0	0	0	0	0	0	0	0	NA	0	NA	0	0	0	0	0	0	0	0	0	0	0	0	0	0
SIXTH	Methanolinea	1	1	0	0	0	0	0	0	0	0	0	0	0	NA	0	NA	0	0	0	0	0	0	0	0	0	0	0	0	0	0
SIXTH	Methanoregula	17	7	0	0	0	0	0	0	0	0	0	0	0	NA	0	NA	0	0	0	0	0	0	0	0	0	0	0	0	0	0
SEVENTH	environmental_samples	4	1	0	0	0	0	0	0	0	0	0	0	0	NA	0	NA	0	0	0	0	0	0	0	0	0	0	0	0	0	0
SEVENTH	unclassified_Methanoregula	11	4	0	0	0	0	0	0	0	0	0	0	0	NA	0	NA	0	0	0	0	0	0	0	0	0	0	0	0	0	0
SIXTH	Methanosphaerula	1	1	0	0	0	0	0	0	0	0	0	0	0	NA	0	NA	0	0	0	0	0	0	0	0	0	0	0	0	0	0
FIFTH	Methanospirillaceae	17	6	0	0	0	0	0	0	0	0	0	0	0	NA	0	NA	0	0	0	0	0	0	0	0	0	0	0	0	0	0
SIXTH	Methanospirillum	17	6	0	0	0	0	0	0	0	0	0	0	0	NA	0	NA	0	0	0	0	0	0	0	0	0	0	0	0	0	0
SEVENTH	environmental_samples	2	1	0	0	0	0	0	0	0	0	0	0	0	NA	0	NA	0	0	0	0	0	0	0	0	0	0	0	0	0	0
SEVENTH	unclassified_Methanospirillum	8	2	0	0	0	0	0	0	0	0	0	0	0	NA	0	NA	0	0	0	0	0	0	0	0	0	0	0	0	0	0
FORTH	Methanosarcinales	195	85	5	5	2.5641	1	1.17647	0	0	0	0	0	0	NA	0	NA	0	0	0	0	0	0	0	0	0	0	0	0	0	0
FIFTH	Candidatus_Methanoperedenaceae	3	2	0	0	0	0	0	0	0	0	0	0	0	NA	0	NA	0	0	0	0	0	0	0	0	0	0	0	0	0	0
SIXTH	Candidatus_Methanoperedens	3	2	0	0	0	0	0	0	0	0	0	0	0	NA	0	NA	0	0	0	0	0	0	0	0	0	0	0	0	0	0
SEVENTH	unclassified_Candidatus_Methanoperedens	1	1	0	0	0	0	0	0	0	0	0	0	0	NA	0	NA	0	0	0	0	0	0	0	0	0	0	0	0	0	0
FIFTH	Methanosarcinaceae	190	82	5	5	2.63158	1	1.21951	0	0	0	0	0	0	NA	0	NA	0	0	0	0	0	0	0	0	0	0	0	0	0	0
SIXTH	Methanimicrococcus	6	4	0	0	0	0	0	0	0	0	0	0	0	NA	0	NA	0	0	0	0	0	0	0	0	0	0	0	0	0	0
SIXTH	Methanococcoides	14	10	0	0	0	0	0	0	0	0	0	0	0	NA	0	NA	0	0	0	0	0	0	0	0	0	0	0	0	0	0
SEVENTH	unclassified_Methanococcoides	4	4	0	0	0	0	0	0	0	0	0	0	0	NA	0	NA	0	0	0	0	0	0	0	0	0	0	0	0	0	0
SIXTH	Methanohalobium	2	2	0	0	0	0	0	0	0	0	0	0	0	NA	0	NA	0	0	0	0	0	0	0	0	0	0	0	0	0	0
SEVENTH	unclassified_Methanohalobium	1	1	0	0	0	0	0	0	0	0	0	0	0	NA	0	NA	0	0	0	0	0	0	0	0	0	0	0	0	0	0
SIXTH	Methanohalophilus	19	11	0	0	0	0	0	0	0	0	0	0	0	NA	0	NA	0	0	0	0	0	0	0	0	0	0	0	0	0	0
SEVENTH	unclassified_Methanohalophilus	5	5	0	0	0	0	0	0	0	0	0	0	0	NA	0	NA	0	0	0	0	0	0	0	0	0	0	0	0	0	0
SIXTH	Methanolapillus	3	3	0	0	0	0	0	0	0	0	0	0	0	NA	0	NA	0	0	0	0	0	0	0	0	0	0	0	0	0	0
SIXTH	Methanolobus	20	14	0	0	0	0	0	0	0	0	0	0	0	NA	0	NA	0	0	0	0	0	0	0	0	0	0	0	0	0	0
SEVENTH	environmental_samples	3	1	0	0	0	0	0	0	0	0	0	0	0	NA	0	NA	0	0	0	0	0	0	0	0	0	0	0	0	0	0
SEVENTH	unclassified_Methanolobus	6	3	0	0	0	0	0	0	0	0	0	0	0	NA	0	NA	0	0	0	0	0	0	0	0	0	0	0	0	0	0
SIXTH	Methanomethylovorans	10	4	0	0	0	0	0	0	0	0	0	0	0	NA	0	NA	0	0	0	0	0	0	0	0	0	0	0	0	0	0
SEVENTH	environmental_samples	2	1	0	0	0	0	0	0	0	0	0	0	0	NA	0	NA	0	0	0	0	0	0	0	0	0	0	0	0	0	0
SEVENTH	unclassified_Methanomethylovorans	7	2	0	0	0	0	0	0	0	0	0	0	0	NA	0	NA	0	0	0	0	0	0	0	0	0	0	0	0	0	0
SIXTH	Methanosalsum	2	2	0	0	0	0	0	0	0	0	0	0	0	NA	0	NA	0	0	0	0	0	0	0	0	0	0	0	0	0	0
SIXTH	Methanosarcina	114	32	5	5	4.38596	1	3.125	0	0	0	0	0	0	NA	0	NA	0	0	0	0	0	0	0	0	0	0	0	0	0	0
SEVENTH	unclassified_Methanosarcina	26	21	0	0	0	0	0	0	0	0	0	0	0	NA	0	NA	0	0	0	0	0	0	0	0	0	0	0	0	0	0
FIFTH	Methermicoccaceae	2	1	0	0	0	0	0	0	0	0	0	0	0	NA	0	NA	0	0	0	0	0	0	0	0	0	0	0	0	0	0
SIXTH	Methermicoccus	2	1	0	0	0	0	0	0	0	0	0	0	0	NA	0	NA	0	0	0	0	0	0	0	0	0	0	0	0	0	0
FORTH	Methanotrichales	40	8	0	0	0	0	0	0	0	0	0	0	0	NA	0	NA	0	0	0	0	0	0	0	0	0	0	0	0	0	0
FIFTH	Methanotrichaceae	40	8	0	0	0	0	0	0	0	0	0	0	0	NA	0	NA	0	0	0	0	0	0	0	0	0	0	0	0	0	0
SIXTH	Methanocrinis	2	2	0	0	0	0	0	0	0	0	0	0	0	NA	0	NA	0	0	0	0	0	0	0	0	0	0	0	0	0	0
SIXTH	Methanothrix	38	6	0	0	0	0	0	0	0	0	0	0	0	NA	0	NA	0	0	0	0	0	0	0	0	0	0	0	0	0	0
SEVENTH	unclassified_Methanothrix	18	3	0	0	0	0	0	0	0	0	0	0	0	NA	0	NA	0	0	0	0	0	0	0	0	0	0	0	0	0	0
THIRD	Methanonatronarchaeia	3	3	0	0	0	0	0	0	0	0	0	0	0	NA	0	NA	0	0	0	0	0	0	0	0	0	0	0	0	0	0
FORTH	Methanonatronarchaeales	3	3	0	0	0	0	0	0	0	0	0	0	0	NA	0	NA	0	0	0	0	0	0	0	0	0	0	0	0	0	0
FIFTH	Methanonatronarchaeaceae	3	3	0	0	0	0	0	0	0	0	0	0	0	NA	0	NA	0	0	0	0	0	0	0	0	0	0	0	0	0	0
SIXTH	Methanonatronarchaeum	3	3	0	0	0	0	0	0	0	0	0	0	0	NA	0	NA	0	0	0	0	0	0	0	0	0	0	0	0	0	0
SEVENTH	unclassified_Methanonatronarchaeum	2	2	0	0	0	0	0	0	0	0	0	0	0	NA	0	NA	0	0	0	0	0	0	0	0	0	0	0	0	0	0
THIRD	Methanopyri	4	3	0	0	0	0	0	0	0	0	0	0	0	NA	0	NA	0	0	0	0	0	0	0	0	0	0	0	0	0	0
FORTH	Methanopyrales	4	3	0	0	0	0	0	0	0	0	0	0	0	NA	0	NA	0	0	0	0	0	0	0	0	0	0	0	0	0	0
FIFTH	Methanopyraceae	4	3	0	0	0	0	0	0	0	0	0	0	0	NA	0	NA	0	0	0	0	0	0	0	0	0	0	0	0	0	0
SIXTH	Methanopyrus	4	3	0	0	0	0	0	0	0	0	0	0	0	NA	0	NA	0	0	0	0	0	0	0	0	0	0	0	0	0	0
SEVENTH	unclassified_Methanopyrus	2	2	0	0	0	0	0	0	0	0	0	0	0	NA	0	NA	0	0	0	0	0	0	0	0	0	0	0	0	0	0
THIRD	Thermococci	128	76	1	1	0.78125	1	1.31579	0	0	0	0	0	0	NA	0	NA	0	0	0	0	0	0	0	0	0	0	0	0	0	0
FORTH	Thermococcales	128	76	1	1	0.78125	1	1.31579	0	0	0	0	0	0	NA	0	NA	0	0	0	0	0	0	0	0	0	0	0	0	0	0
FIFTH	Thermococcaceae	128	76	1	1	0.78125	1	1.31579	0	0	0	0	0	0	NA	0	NA	0	0	0	0	0	0	0	0	0	0	0	0	0	0
SIXTH	Palaeococcus	3	3	0	0	0	0	0	0	0	0	0	0	0	NA	0	NA	0	0	0	0	0	0	0	0	0	0	0	0	0	0
SEVENTH	unclassified_Palaeococcus_in_euryarchaeotes	1	1	0	0	0	0	0	0	0	0	0	0	0	NA	0	NA	0	0	0	0	0	0	0	0	0	0	0	0	0	0
SIXTH	Pyrococcus	22	8	0	0	0	0	0	0	0	0	0	0	0	NA	0	NA	0	0	0	0	0	0	0	0	0	0	0	0	0	0
SEVENTH	unclassified_Pyrococcus	3	3	0	0	0	0	0	0	0	0	0	0	0	NA	0	NA	0	0	0	0	0	0	0	0	0	0	0	0	0	0
SIXTH	Thermococcus	103	65	1	1	0.970874	1	1.53846	0	0	0	0	0	0	NA	0	NA	0	0	0	0	0	0	0	0	0	0	0	0	0	0
SEVENTH	unclassified_Thermococcus	58	30	0	0	0	0	0	0	0	0	0	0	0	NA	0	NA	0	0	0	0	0	0	0	0	0	0	0	0	0	0
SECOND	Nanoarchaeota	3	3	0	0	0	0	0	0	0	0	0	0	0	NA	0	NA	0	0	0	0	0	0	0	0	0	0	0	0	0	0
THIRD	Candidatus_Nanoarchaeia	2	2	0	0	0	0	0	0	0	0	0	0	0	NA	0	NA	0	0	0	0	0	0	0	0	0	0	0	0	0	0
FORTH	Nanoarchaeales	2	2	0	0	0	0	0	0	0	0	0	0	0	NA	0	NA	0	0	0	0	0	0	0	0	0	0	0	0	0	0
FIFTH	Nanopusillaceae	2	2	0	0	0	0	0	0	0	0	0	0	0	NA	0	NA	0	0	0	0	0	0	0	0	0	0	0	0	0	0
SIXTH	Candidatus_Nanobsidianus	1	1	0	0	0	0	0	0	0	0	0	0	0	NA	0	NA	0	0	0	0	0	0	0	0	0	0	0	0	0	0
SIXTH	Candidatus_Nanopusillus	1	1	0	0	0	0	0	0	0	0	0	0	0	NA	0	NA	0	0	0	0	0	0	0	0	0	0	0	0	0	0
THIRD	Nanobdellia	1	1	0	0	0	0	0	0	0	0	0	0	0	NA	0	NA	0	0	0	0	0	0	0	0	0	0	0	0	0	0
FORTH	Nanobdellales	1	1	0	0	0	0	0	0	0	0	0	0	0	NA	0	NA	0	0	0	0	0	0	0	0	0	0	0	0	0	0
FIFTH	Nanobdellaceae	1	1	0	0	0	0	0	0	0	0	0	0	0	NA	0	NA	0	0	0	0	0	0	0	0	0	0	0	0	0	0
SIXTH	Nanobdella	1	1	0	0	0	0	0	0	0	0	0	0	0	NA	0	NA	0	0	0	0	0	0	0	0	0	0	0	0	0	0
SECOND	Nitrososphaerota	70	48	0	0	0	0	0	0	0	0	0	0	0	NA	0	NA	0	0	0	0	0	0	0	0	0	0	0	0	0	0
THIRD	Conexivisphaeria	1	1	0	0	0	0	0	0	0	0	0	0	0	NA	0	NA	0	0	0	0	0	0	0	0	0	0	0	0	0	0
FORTH	Conexivisphaerales	1	1	0	0	0	0	0	0	0	0	0	0	0	NA	0	NA	0	0	0	0	0	0	0	0	0	0	0	0	0	0
FIFTH	Conexivisphaeraceae	1	1	0	0	0	0	0	0	0	0	0	0	0	NA	0	NA	0	0	0	0	0	0	0	0	0	0	0	0	0	0
SIXTH	Conexivisphaera	1	1	0	0	0	0	0	0	0	0	0	0	0	NA	0	NA	0	0	0	0	0	0	0	0	0	0	0	0	0	0
THIRD	Nitrososphaeria	54	36	0	0	0	0	0	0	0	0	0	0	0	NA	0	NA	0	0	0	0	0	0	0	0	0	0	0	0	0	0
FORTH	Candidatus_Nitrosocaldales	2	2	0	0	0	0	0	0	0	0	0	0	0	NA	0	NA	0	0	0	0	0	0	0	0	0	0	0	0	0	0
FIFTH	Candidatus_Nitrosocaldaceae	2	2	0	0	0	0	0	0	0	0	0	0	0	NA	0	NA	0	0	0	0	0	0	0	0	0	0	0	0	0	0
SIXTH	Candidatus_Nitrosocaldus	2	2	0	0	0	0	0	0	0	0	0	0	0	NA	0	NA	0	0	0	0	0	0	0	0	0	0	0	0	0	0
FORTH	Nitrosopumilales	35	23	0	0	0	0	0	0	0	0	0	0	0	NA	0	NA	0	0	0	0	0	0	0	0	0	0	0	0	0	0
FIFTH	Nitrosopumilaceae	35	23	0	0	0	0	0	0	0	0	0	0	0	NA	0	NA	0	0	0	0	0	0	0	0	0	0	0	0	0	0
SIXTH	Candidatus_Nitrosomarinus	1	1	0	0	0	0	0	0	0	0	0	0	0	NA	0	NA	0	0	0	0	0	0	0	0	0	0	0	0	0	0
SIXTH	Nitrosarchaeum	5	4	0	0	0	0	0	0	0	0	0	0	0	NA	0	NA	0	0	0	0	0	0	0	0	0	0	0	0	0	0
SEVENTH	unclassified_Nitrosarchaeum	3	2	0	0	0	0	0	0	0	0	0	0	0	NA	0	NA	0	0	0	0	0	0	0	0	0	0	0	0	0	0
SIXTH	Nitrosopumilus	29	18	0	0	0	0	0	0	0	0	0	0	0	NA	0	NA	0	0	0	0	0	0	0	0	0	0	0	0	0	0
SEVENTH	unclassified_Nitrosopumilus	17	8	0	0	0	0	0	0	0	0	0	0	0	NA	0	NA	0	0	0	0	0	0	0	0	0	0	0	0	0	0
FORTH	Nitrososphaerales	17	11	0	0	0	0	0	0	0	0	0	0	0	NA	0	NA	0	0	0	0	0	0	0	0	0	0	0	0	0	0
FIFTH	Nitrososphaeraceae	17	11	0	0	0	0	0	0	0	0	0	0	0	NA	0	NA	0	0	0	0	0	0	0	0	0	0	0	0	0	0
SIXTH	Candidatus_Nitrosocosmicus	6	5	0	0	0	0	0	0	0	0	0	0	0	NA	0	NA	0	0	0	0	0	0	0	0	0	0	0	0	0	0
SEVENTH	unclassified_Candidatus_Nitrosocosmicus	2	1	0	0	0	0	0	0	0	0	0	0	0	NA	0	NA	0	0	0	0	0	0	0	0	0	0	0	0	0	0
SIXTH	Nitrososphaera	11	6	0	0	0	0	0	0	0	0	0	0	0	NA	0	NA	0	0	0	0	0	0	0	0	0	0	0	0	0	0
SEVENTH	environmental_samples	1	1	0	0	0	0	0	0	0	0	0	0	0	NA	0	NA	0	0	0	0	0	0	0	0	0	0	0	0	0	0
SEVENTH	unclassified_Nitrososphaera	5	2	0	0	0	0	0	0	0	0	0	0	0	NA	0	NA	0	0	0	0	0	0	0	0	0	0	0	0	0	0
THIRD	Nitrososphaerota_incertae_sedis	15	11	0	0	0	0	0	0	0	0	0	0	0	NA	0	NA	0	0	0	0	0	0	0	0	0	0	0	0	0	0
FORTH	Candidatus_Nitrosopelagicus	2	1	0	0	0	0	0	0	0	0	0	0	0	NA	0	NA	0	0	0	0	0	0	0	0	0	0	0	0	0	0
FORTH	Candidatus_Nitrosotalea	5	5	0	0	0	0	0	0	0	0	0	0	0	NA	0	NA	0	0	0	0	0	0	0	0	0	0	0	0	0	0
FIFTH	unclassified_Candidatus_Nitrosotalea	2	2	0	0	0	0	0	0	0	0	0	0	0	NA	0	NA	0	0	0	0	0	0	0	0	0	0	0	0	0	0
FORTH	Candidatus_Nitrosotenuis	8	5	0	0	0	0	0	0	0	0	0	0	0	NA	0	NA	0	0	0	0	0	0	0	0	0	0	0	0	0	0
FIFTH	unclassified_Candidatus_Nitrosotenuis	1	1	0	0	0	0	0	0	0	0	0	0	0	NA	0	NA	0	0	0	0	0	0	0	0	0	0	0	0	0	0
SECOND	Thermoproteota	329	96	0	0	0	0	0	0	0	0	0	0	0	NA	0	NA	0	0	0	0	0	0	0	0	0	0	0	0	0	0
THIRD	Candidatus_Korarchaeia	3	2	0	0	0	0	0	0	0	0	0	0	0	NA	0	NA	0	0	0	0	0	0	0	0	0	0	0	0	0	0
FORTH	Candidatus_Korarchaeales	2	1	0	0	0	0	0	0	0	0	0	0	0	NA	0	NA	0	0	0	0	0	0	0	0	0	0	0	0	0	0
FIFTH	Candidatus_Korarchaeaceae	2	1	0	0	0	0	0	0	0	0	0	0	0	NA	0	NA	0	0	0	0	0	0	0	0	0	0	0	0	0	0
SIXTH	Candidatus_Korarchaeum	2	1	0	0	0	0	0	0	0	0	0	0	0	NA	0	NA	0	0	0	0	0	0	0	0	0	0	0	0	0	0
FORTH	Candidatus_Korarchaeia_incertae_sedis	1	1	0	0	0	0	0	0	0	0	0	0	0	NA	0	NA	0	0	0	0	0	0	0	0	0	0	0	0	0	0
FIFTH	Candidatus_Methanodesulfokores	1	1	0	0	0	0	0	0	0	0	0	0	0	NA	0	NA	0	0	0	0	0	0	0	0	0	0	0	0	0	0
THIRD	Thermoprotei	326	94	0	0	0	0	0	0	0	0	0	0	0	NA	0	NA	0	0	0	0	0	0	0	0	0	0	0	0	0	0
FORTH	Acidilobales	4	4	0	0	0	0	0	0	0	0	0	0	0	NA	0	NA	0	0	0	0	0	0	0	0	0	0	0	0	0	0
FIFTH	Acidilobaceae	2	2	0	0	0	0	0	0	0	0	0	0	0	NA	0	NA	0	0	0	0	0	0	0	0	0	0	0	0	0	0
SIXTH	Acidilobus	2	2	0	0	0	0	0	0	0	0	0	0	0	NA	0	NA	0	0	0	0	0	0	0	0	0	0	0	0	0	0
SEVENTH	unclassified_Acidilobus	1	1	0	0	0	0	0	0	0	0	0	0	0	NA	0	NA	0	0	0	0	0	0	0	0	0	0	0	0	0	0
FIFTH	Caldisphaeraceae	2	2	0	0	0	0	0	0	0	0	0	0	0	NA	0	NA	0	0	0	0	0	0	0	0	0	0	0	0	0	0
SIXTH	Caldisphaera	2	2	0	0	0	0	0	0	0	0	0	0	0	NA	0	NA	0	0	0	0	0	0	0	0	0	0	0	0	0	0
SEVENTH	unclassified_Caldisphaera	1	1	0	0	0	0	0	0	0	0	0	0	0	NA	0	NA	0	0	0	0	0	0	0	0	0	0	0	0	0	0
FORTH	Desulfurococcales	31	18	0	0	0	0	0	0	0	0	0	0	0	NA	0	NA	0	0	0	0	0	0	0	0	0	0	0	0	0	0
FIFTH	Desulfurococcaceae	24	12	0	0	0	0	0	0	0	0	0	0	0	NA	0	NA	0	0	0	0	0	0	0	0	0	0	0	0	0	0
SIXTH	Aeropyrum	4	2	0	0	0	0	0	0	0	0	0	0	0	NA	0	NA	0	0	0	0	0	0	0	0	0	0	0	0	0	0
SIXTH	Desulfurococcus	12	3	0	0	0	0	0	0	0	0	0	0	0	NA	0	NA	0	0	0	0	0	0	0	0	0	0	0	0	0	0
SEVENTH	unclassified_Desulfurococcus	6	1	0	0	0	0	0	0	0	0	0	0	0	NA	0	NA	0	0	0	0	0	0	0	0	0	0	0	0	0	0
SIXTH	Ignicoccus	2	2	0	0	0	0	0	0	0	0	0	0	0	NA	0	NA	0	0	0	0	0	0	0	0	0	0	0	0	0	0
SIXTH	Ignisphaera	1	1	0	0	0	0	0	0	0	0	0	0	0	NA	0	NA	0	0	0	0	0	0	0	0	0	0	0	0	0	0
SIXTH	Staphylothermus	2	2	0	0	0	0	0	0	0	0	0	0	0	NA	0	NA	0	0	0	0	0	0	0	0	0	0	0	0	0	0
SIXTH	Thermogladius	1	1	0	0	0	0	0	0	0	0	0	0	0	NA	0	NA	0	0	0	0	0	0	0	0	0	0	0	0	0	0
SIXTH	Thermosphaera	2	1	0	0	0	0	0	0	0	0	0	0	0	NA	0	NA	0	0	0	0	0	0	0	0	0	0	0	0	0	0
FIFTH	Pyrodictiaceae	7	6	0	0	0	0	0	0	0	0	0	0	0	NA	0	NA	0	0	0	0	0	0	0	0	0	0	0	0	0	0
SIXTH	Hyperthermus	1	1	0	0	0	0	0	0	0	0	0	0	0	NA	0	NA	0	0	0	0	0	0	0	0	0	0	0	0	0	0
SIXTH	Pyrodictium	4	3	0	0	0	0	0	0	0	0	0	0	0	NA	0	NA	0	0	0	0	0	0	0	0	0	0	0	0	0	0
SIXTH	Pyrofollis	1	1	0	0	0	0	0	0	0	0	0	0	0	NA	0	NA	0	0	0	0	0	0	0	0	0	0	0	0	0	0
SIXTH	Pyrolobus	1	1	0	0	0	0	0	0	0	0	0	0	0	NA	0	NA	0	0	0	0	0	0	0	0	0	0	0	0	0	0
FORTH	Fervidicoccales	3	1	0	0	0	0	0	0	0	0	0	0	0	NA	0	NA	0	0	0	0	0	0	0	0	0	0	0	0	0	0
FIFTH	Fervidicoccaceae	3	1	0	0	0	0	0	0	0	0	0	0	0	NA	0	NA	0	0	0	0	0	0	0	0	0	0	0	0	0	0
SIXTH	Fervidicoccus	3	1	0	0	0	0	0	0	0	0	0	0	0	NA	0	NA	0	0	0	0	0	0	0	0	0	0	0	0	0	0
FORTH	Sulfolobales	223	41	0	0	0	0	0	0	0	0	0	0	0	NA	0	NA	0	0	0	0	0	0	0	0	0	0	0	0	0	0
FIFTH	Sulfolobaceae	223	41	0	0	0	0	0	0	0	0	0	0	0	NA	0	NA	0	0	0	0	0	0	0	0	0	0	0	0	0	0
SIXTH	Acidianus	11	9	0	0	0	0	0	0	0	0	0	0	0	NA	0	NA	0	0	0	0	0	0	0	0	0	0	0	0	0	0
SEVENTH	unclassified_Acidianus	2	2	0	0	0	0	0	0	0	0	0	0	0	NA	0	NA	0	0	0	0	0	0	0	0	0	0	0	0	0	0
SIXTH	Metallosphaera	59	8	0	0	0	0	0	0	0	0	0	0	0	NA	0	NA	0	0	0	0	0	0	0	0	0	0	0	0	0	0
SEVENTH	unclassified_Metallosphaera	40	1	0	0	0	0	0	0	0	0	0	0	0	NA	0	NA	0	0	0	0	0	0	0	0	0	0	0	0	0	0
SIXTH	Saccharolobus	46	4	0	0	0	0	0	0	0	0	0	0	0	NA	0	NA	0	0	0	0	0	0	0	0	0	0	0	0	0	0
SEVENTH	unclassified_Saccharolobus	29	1	0	0	0	0	0	0	0	0	0	0	0	NA	0	NA	0	0	0	0	0	0	0	0	0	0	0	0	0	0
SIXTH	Stygiolobus	6	6	0	0	0	0	0	0	0	0	0	0	0	NA	0	NA	0	0	0	0	0	0	0	0	0	0	0	0	0	0
SEVENTH	unclassified_Stygiolobus	4	4	0	0	0	0	0	0	0	0	0	0	0	NA	0	NA	0	0	0	0	0	0	0	0	0	0	0	0	0	0
SIXTH	Sulfodiicoccus	2	1	0	0	0	0	0	0	0	0	0	0	0	NA	0	NA	0	0	0	0	0	0	0	0	0	0	0	0	0	0
SIXTH	Sulfolobus	86	8	0	0	0	0	0	0	0	0	0	0	0	NA	0	NA	0	0	0	0	0	0	0	0	0	0	0	0	0	0
SEVENTH	unclassified_Sulfolobus	5	5	0	0	0	0	0	0	0	0	0	0	0	NA	0	NA	0	0	0	0	0	0	0	0	0	0	0	0	0	0
SIXTH	Sulfuracidifex	6	2	0	0	0	0	0	0	0	0	0	0	0	NA	0	NA	0	0	0	0	0	0	0	0	0	0	0	0	0	0
SIXTH	Sulfurisphaera	7	3	0	0	0	0	0	0	0	0	0	0	0	NA	0	NA	0	0	0	0	0	0	0	0	0	0	0	0	0	0
FORTH	Thermofilales	22	6	0	0	0	0	0	0	0	0	0	0	0	NA	0	NA	0	0	0	0	0	0	0	0	0	0	0	0	0	0
FIFTH	Thermofilaceae	22	6	0	0	0	0	0	0	0	0	0	0	0	NA	0	NA	0	0	0	0	0	0	0	0	0	0	0	0	0	0
SIXTH	Infirmifilum	2	2	0	0	0	0	0	0	0	0	0	0	0	NA	0	NA	0	0	0	0	0	0	0	0	0	0	0	0	0	0
SEVENTH	unclassified_Infirmifilum	1	1	0	0	0	0	0	0	0	0	0	0	0	NA	0	NA	0	0	0	0	0	0	0	0	0	0	0	0	0	0
SIXTH	Thermofilum	20	4	0	0	0	0	0	0	0	0	0	0	0	NA	0	NA	0	0	0	0	0	0	0	0	0	0	0	0	0	0
SEVENTH	unclassified_Thermofilum	16	1	0	0	0	0	0	0	0	0	0	0	0	NA	0	NA	0	0	0	0	0	0	0	0	0	0	0	0	0	0
FORTH	Thermoproteales	43	24	0	0	0	0	0	0	0	0	0	0	0	NA	0	NA	0	0	0	0	0	0	0	0	0	0	0	0	0	0
FIFTH	Thermoproteaceae	43	24	0	0	0	0	0	0	0	0	0	0	0	NA	0	NA	0	0	0	0	0	0	0	0	0	0	0	0	0	0
SIXTH	Caldivirga	4	4	0	0	0	0	0	0	0	0	0	0	0	NA	0	NA	0	0	0	0	0	0	0	0	0	0	0	0	0	0
SEVENTH	unclassified_Caldivirga	3	3	0	0	0	0	0	0	0	0	0	0	0	NA	0	NA	0	0	0	0	0	0	0	0	0	0	0	0	0	0
SIXTH	Pyrobaculum	23	8	0	0	0	0	0	0	0	0	0	0	0	NA	0	NA	0	0	0	0	0	0	0	0	0	0	0	0	0	0
SEVENTH	unclassified_Pyrobaculum	10	2	0	0	0	0	0	0	0	0	0	0	0	NA	0	NA	0	0	0	0	0	0	0	0	0	0	0	0	0	0
SIXTH	Thermocladium	1	1	0	0	0	0	0	0	0	0	0	0	0	NA	0	NA	0	0	0	0	0	0	0	0	0	0	0	0	0	0
SIXTH	Thermoproteus	3	3	0	0	0	0	0	0	0	0	0	0	0	NA	0	NA	0	0	0	0	0	0	0	0	0	0	0	0	0	0
SEVENTH	unclassified_Thermoproteus	1	1	0	0	0	0	0	0	0	0	0	0	0	NA	0	NA	0	0	0	0	0	0	0	0	0	0	0	0	0	0
SIXTH	Vulcanisaeta	12	8	0	0	0	0	0	0	0	0	0	0	0	NA	0	NA	0	0	0	0	0	0	0	0	0	0	0	0	0	0
SEVENTH	unclassified_Vulcanisaeta	4	4	0	0	0	0	0	0	0	0	0	0	0	NA	0	NA	0	0	0	0	0	0	0	0	0	0	0	0	0	0
FIRST	Bacteria	378459	54387	224952	153618	40.5904	18942	34.8282	219800	151803	40.1108	18729	34.4365	5819	0.0264741	6185	0.0281392	213275	150437	39.7499	18329	33.7011	5329	5710	209399	148024	39.1123	17614	32.3864	4843	5212
SECOND	Abditibacteriota	1	1	1	1	100	1	100	1	1	100	1	100	1	1	1	1	1	1	100	1	100	1	1	0	0	0	0	0	0	0
THIRD	Abditibacteriia	1	1	1	1	100	1	100	1	1	100	1	100	1	1	1	1	1	1	100	1	100	1	1	0	0	0	0	0	0	0
FORTH	Abditibacteriales	1	1	1	1	100	1	100	1	1	100	1	100	1	1	1	1	1	1	100	1	100	1	1	0	0	0	0	0	0	0
FIFTH	Abditibacteriaceae	1	1	1	1	100	1	100	1	1	100	1	100	1	1	1	1	1	1	100	1	100	1	1	0	0	0	0	0	0	0
SIXTH	Abditibacterium	1	1	1	1	100	1	100	1	1	100	1	100	1	1	1	1	1	1	100	1	100	1	1	0	0	0	0	0	0	0
SECOND	Acidobacteriota	131	100	71	69	52.6718	58	58	70	69	52.6718	58	58	53	0.757143	51	0.728571	70	69	52.6718	58	58	53	51	65	64	48.855	55	55	49	47
THIRD	Blastocatellia	13	6	0	0	0	0	0	0	0	0	0	0	0	NA	0	NA	0	0	0	0	0	0	0	0	0	0	0	0	0	0
FORTH	Blastocatellales	2	2	0	0	0	0	0	0	0	0	0	0	0	NA	0	NA	0	0	0	0	0	0	0	0	0	0	0	0	0	0
FIFTH	Pyrinomonadaceae	2	2	0	0	0	0	0	0	0	0	0	0	0	NA	0	NA	0	0	0	0	0	0	0	0	0	0	0	0	0	0
SIXTH	Pyrinomonas	2	2	0	0	0	0	0	0	0	0	0	0	0	NA	0	NA	0	0	0	0	0	0	0	0	0	0	0	0	0	0
SEVENTH	unclassified_Pyrinomonas	1	1	0	0	0	0	0	0	0	0	0	0	0	NA	0	NA	0	0	0	0	0	0	0	0	0	0	0	0	0	0
FORTH	Chloracidobacterium	11	4	0	0	0	0	0	0	0	0	0	0	0	NA	0	NA	0	0	0	0	0	0	0	0	0	0	0	0	0	0
FIFTH	unclassified_Chloracidobacterium	1	1	0	0	0	0	0	0	0	0	0	0	0	NA	0	NA	0	0	0	0	0	0	0	0	0	0	0	0	0	0
THIRD	Holophagae	26	24	19	19	73.0769	17	70.8333	19	19	73.0769	17	70.8333	9	0.473684	9	0.473684	19	19	73.0769	17	70.8333	9	9	19	19	73.0769	17	70.8333	9	9
FORTH	Acanthopleuribacterales	2	2	0	0	0	0	0	0	0	0	0	0	0	NA	0	NA	0	0	0	0	0	0	0	0	0	0	0	0	0	0
FIFTH	Acanthopleuribacteraceae	2	2	0	0	0	0	0	0	0	0	0	0	0	NA	0	NA	0	0	0	0	0	0	0	0	0	0	0	0	0	0
SIXTH	Acanthopleuribacter	1	1	0	0	0	0	0	0	0	0	0	0	0	NA	0	NA	0	0	0	0	0	0	0	0	0	0	0	0	0	0
SIXTH	Sulfidibacter	1	1	0	0	0	0	0	0	0	0	0	0	0	NA	0	NA	0	0	0	0	0	0	0	0	0	0	0	0	0	0
FORTH	Holophagales	23	21	19	19	82.6087	17	80.9524	19	19	82.6087	17	80.9524	9	0.473684	9	0.473684	19	19	82.6087	17	80.9524	9	9	19	19	82.6087	17	80.9524	9	9
FIFTH	Holophagaceae	23	21	19	19	82.6087	17	80.9524	19	19	82.6087	17	80.9524	9	0.473684	9	0.473684	19	19	82.6087	17	80.9524	9	9	19	19	82.6087	17	80.9524	9	9
SIXTH	Geothrix	19	17	16	16	84.2105	14	82.3529	16	16	84.2105	14	82.3529	7	0.4375	7	0.4375	16	16	84.2105	14	82.3529	7	7	16	16	84.2105	14	82.3529	7	7
SEVENTH	unclassified_Geothrix	7	5	5	5	71.4286	3	60	5	5	71.4286	3	60	4	0.8	4	0.8	5	5	71.4286	3	60	4	4	5	5	71.4286	3	60	4	4
SIXTH	Holophaga	2	2	1	1	50	1	50	1	1	50	1	50	1	1	1	1	1	1	50	1	50	1	1	1	1	50	1	50	1	1
SEVENTH	environmental_samples	1	1	1	1	100	1	100	1	1	100	1	100	1	1	1	1	1	1	100	1	100	1	1	1	1	100	1	100	1	1
SIXTH	Mesoterricola	2	2	2	2	100	2	100	2	2	100	2	100	2	1	2	1	2	2	100	2	100	2	2	2	2	100	2	100	2	2
FORTH	Thermotomaculales	1	1	0	0	0	0	0	0	0	0	0	0	0	NA	0	NA	0	0	0	0	0	0	0	0	0	0	0	0	0	0
FIFTH	Thermotomaculaceae	1	1	0	0	0	0	0	0	0	0	0	0	0	NA	0	NA	0	0	0	0	0	0	0	0	0	0	0	0	0	0
SIXTH	Thermotomaculum	1	1	0	0	0	0	0	0	0	0	0	0	0	NA	0	NA	0	0	0	0	0	0	0	0	0	0	0	0	0	0
THIRD	Terriglobia	88	66	52	50	56.8182	41	62.1212	51	50	56.8182	41	62.1212	44	0.862745	42	0.823529	51	50	56.8182	41	62.1212	44	42	46	45	51.1364	38	57.5758	40	38
FORTH	Bryobacterales	3	3	3	3	100	3	100	3	3	100	3	100	3	1	3	1	3	3	100	3	100	3	3	3	3	100	3	100	3	3
FIFTH	Bryobacteraceae	3	3	3	3	100	3	100	3	3	100	3	100	3	1	3	1	3	3	100	3	100	3	3	3	3	100	3	100	3	3
SIXTH	Bryobacter	1	1	1	1	100	1	100	1	1	100	1	100	1	1	1	1	1	1	100	1	100	1	1	1	1	100	1	100	1	1
SIXTH	Paludibaculum	2	2	2	2	100	2	100	2	2	100	2	100	2	1	2	1	2	2	100	2	100	2	2	2	2	100	2	100	2	2
SEVENTH	environmental_samples	1	1	1	1	100	1	100	1	1	100	1	100	1	1	1	1	1	1	100	1	100	1	1	1	1	100	1	100	1	1
FORTH	Terriglobales	85	63	49	47	55.2941	38	60.3175	48	47	55.2941	38	60.3175	41	0.854167	39	0.8125	48	47	55.2941	38	60.3175	41	39	43	42	49.4118	35	55.5556	37	35
FIFTH	Acidobacteriaceae	82	60	48	46	56.0976	37	61.6667	47	46	56.0976	37	61.6667	40	0.851064	38	0.808511	47	46	56.0976	37	61.6667	40	38	42	41	50	34	56.6667	36	34
SIXTH	Acidicapsa	3	3	2	2	66.6667	2	66.6667	2	2	66.6667	2	66.6667	2	1	2	1	2	2	66.6667	2	66.6667	2	2	2	2	66.6667	2	66.6667	2	2
SIXTH	Acidipila	2	2	2	2	100	2	100	2	2	100	2	100	2	1	2	1	2	2	100	2	100	2	2	2	2	100	2	100	2	2
SEVENTH	unclassified_Acidipila	1	1	1	1	100	1	100	1	1	100	1	100	1	1	1	1	1	1	100	1	100	1	1	1	1	100	1	100	1	1
SIXTH	Acidisarcina	1	1	2	1	100	1	100	1	1	100	1	100	1	1	1	1	1	1	100	1	100	1	1	0	0	0	0	0	0	0
SIXTH	Acidobacterium	3	3	3	3	100	3	100	3	3	100	3	100	2	0.666667	2	0.666667	3	3	100	3	100	2	2	2	2	66.6667	2	66.6667	1	1
SEVENTH	unclassified_Acidobacterium	2	2	2	2	100	2	100	2	2	100	2	100	2	1	2	1	2	2	100	2	100	2	2	1	1	50	1	50	1	1
SIXTH	Alloacidobacterium	2	2	0	0	0	0	0	0	0	0	0	0	0	NA	0	NA	0	0	0	0	0	0	0	0	0	0	0	0	0	0
SEVENTH	unclassified_Alloacidobacterium	1	1	0	0	0	0	0	0	0	0	0	0	0	NA	0	NA	0	0	0	0	0	0	0	0	0	0	0	0	0	0
SIXTH	Bryocella	1	1	1	1	100	1	100	1	1	100	1	100	1	1	1	1	1	1	100	1	100	1	1	1	1	100	1	100	1	1
SIXTH	Edaphobacter	25	12	10	10	40	9	75	10	10	40	9	75	10	1	10	1	10	10	40	9	75	10	10	10	10	40	9	75	10	10
SEVENTH	unclassified_Edaphobacter	7	4	4	4	57.1429	4	100	4	4	57.1429	4	100	4	1	4	1	4	4	57.1429	4	100	4	4	4	4	57.1429	4	100	4	4
SIXTH	Granulicella	20	17	12	11	55	9	52.9412	12	11	55	9	52.9412	11	0.916667	10	0.833333	12	11	55	9	52.9412	11	10	12	11	55	9	52.9412	11	10
SEVENTH	unclassified_Granulicella	8	8	4	4	50	4	50	4	4	50	4	50	4	1	4	1	4	4	50	4	50	4	4	4	4	50	4	50	4	4
SIXTH	Occallatibacter	2	2	1	1	50	1	50	1	1	50	1	50	1	1	1	1	1	1	50	1	50	1	1	1	1	50	1	50	1	1
SIXTH	Paracidobacterium	1	1	0	0	0	0	0	0	0	0	0	0	0	NA	0	NA	0	0	0	0	0	0	0	0	0	0	0	0	0	0
SIXTH	Pseudacidobacterium	1	1	0	0	0	0	0	0	0	0	0	0	0	NA	0	NA	0	0	0	0	0	0	0	0	0	0	0	0	0	0
SIXTH	Silvibacterium	4	2	4	4	100	2	100	4	4	100	2	100	2	0.5	2	0.5	4	4	100	2	100	2	2	2	2	50	1	50	1	1
SIXTH	Telmatobacter	1	1	0	0	0	0	0	0	0	0	0	0	0	NA	0	NA	0	0	0	0	0	0	0	0	0	0	0	0	0	0
SEVENTH	unclassified_Telmatobacter	1	1	0	0	0	0	0	0	0	0	0	0	0	NA	0	NA	0	0	0	0	0	0	0	0	0	0	0	0	0	0
SIXTH	Terracidiphilus	1	1	0	0	0	0	0	0	0	0	0	0	0	NA	0	NA	0	0	0	0	0	0	0	0	0	0	0	0	0	0
SIXTH	Terriglobus	12	8	11	11	91.6667	7	87.5	11	11	91.6667	7	87.5	8	0.727273	7	0.636364	11	11	91.6667	7	87.5	8	7	10	10	83.3333	7	87.5	7	6
SEVENTH	unclassified_Terriglobus	3	3	2	2	66.6667	2	66.6667	2	2	66.6667	2	66.6667	1	0.5	1	0.5	2	2	66.6667	2	66.6667	1	1	2	2	66.6667	2	66.6667	1	1
SIXTH	Tunturibacter	3	3	0	0	0	0	0	0	0	0	0	0	0	NA	0	NA	0	0	0	0	0	0	0	0	0	0	0	0	0	0
FIFTH	Candidatus_Korobacteraceae	3	3	1	1	33.3333	1	33.3333	1	1	33.3333	1	33.3333	1	1	1	1	1	1	33.3333	1	33.3333	1	1	1	1	33.3333	1	33.3333	1	1
SIXTH	Candidatus_Korobacter	1	1	1	1	100	1	100	1	1	100	1	100	1	1	1	1	1	1	100	1	100	1	1	1	1	100	1	100	1	1
SIXTH	Candidatus_Sulfotelmatobacter	2	2	0	0	0	0	0	0	0	0	0	0	0	NA	0	NA	0	0	0	0	0	0	0	0	0	0	0	0	0	0
SEVENTH	unclassified_Candidatus_Sulfotelmatobacter	2	2	0	0	0	0	0	0	0	0	0	0	0	NA	0	NA	0	0	0	0	0	0	0	0	0	0	0	0	0	0
THIRD	Thermoanaerobaculia	1	1	0	0	0	0	0	0	0	0	0	0	0	NA	0	NA	0	0	0	0	0	0	0	0	0	0	0	0	0	0
FORTH	Thermoanaerobaculales	1	1	0	0	0	0	0	0	0	0	0	0	0	NA	0	NA	0	0	0	0	0	0	0	0	0	0	0	0	0	0
FIFTH	Thermoanaerobaculaceae	1	1	0	0	0	0	0	0	0	0	0	0	0	NA	0	NA	0	0	0	0	0	0	0	0	0	0	0	0	0	0
SIXTH	Thermoanaerobaculum	1	1	0	0	0	0	0	0	0	0	0	0	0	NA	0	NA	0	0	0	0	0	0	0	0	0	0	0	0	0	0
THIRD	Vicinamibacteria	3	3	0	0	0	0	0	0	0	0	0	0	0	NA	0	NA	0	0	0	0	0	0	0	0	0	0	0	0	0	0
FORTH	Vicinamibacterales	3	3	0	0	0	0	0	0	0	0	0	0	0	NA	0	NA	0	0	0	0	0	0	0	0	0	0	0	0	0	0
FIFTH	Vicinamibacteraceae	3	3	0	0	0	0	0	0	0	0	0	0	0	NA	0	NA	0	0	0	0	0	0	0	0	0	0	0	0	0	0
SIXTH	Luteitalea	3	3	0	0	0	0	0	0	0	0	0	0	0	NA	0	NA	0	0	0	0	0	0	0	0	0	0	0	0	0	0
SEVENTH	unclassified_Luteitalea	2	2	0	0	0	0	0	0	0	0	0	0	0	NA	0	NA	0	0	0	0	0	0	0	0	0	0	0	0	0	0
SECOND	Actinomycetota	36654	12333	21558	20082	54.788	6495	52.6636	21345	19915	54.3324	6428	52.1203	1822	0.0853596	2272	0.106442	21165	19853	54.1633	6390	51.8122	1762	2195	20522	19330	52.7364	6081	49.3067	1594	2002
THIRD	Acidimicrobiia	76	26	0	0	0	0	0	0	0	0	0	0	0	NA	0	NA	0	0	0	0	0	0	0	0	0	0	0	0	0	0
FORTH	Acidimicrobiales	76	26	0	0	0	0	0	0	0	0	0	0	0	NA	0	NA	0	0	0	0	0	0	0	0	0	0	0	0	0	0
FIFTH	Acidimicrobiaceae	36	8	0	0	0	0	0	0	0	0	0	0	0	NA	0	NA	0	0	0	0	0	0	0	0	0	0	0	0	0	0
SIXTH	Acidiferrimicrobium	1	1	0	0	0	0	0	0	0	0	0	0	0	NA	0	NA	0	0	0	0	0	0	0	0	0	0	0	0	0	0
SEVENTH	unclassified_Acidiferrimicrobium	1	1	0	0	0	0	0	0	0	0	0	0	0	NA	0	NA	0	0	0	0	0	0	0	0	0	0	0	0	0	0
SIXTH	Acidimicrobium	1	1	0	0	0	0	0	0	0	0	0	0	0	NA	0	NA	0	0	0	0	0	0	0	0	0	0	0	0	0	0
SIXTH	Aciditerrimonas	1	1	0	0	0	0	0	0	0	0	0	0	0	NA	0	NA	0	0	0	0	0	0	0	0	0	0	0	0	0	0
SIXTH	Acidithrix	2	2	0	0	0	0	0	0	0	0	0	0	0	NA	0	NA	0	0	0	0	0	0	0	0	0	0	0	0	0	0
SEVENTH	unclassified_Acidithrix	1	1	0	0	0	0	0	0	0	0	0	0	0	NA	0	NA	0	0	0	0	0	0	0	0	0	0	0	0	0	0
SIXTH	Ferrimicrobium	30	2	0	0	0	0	0	0	0	0	0	0	0	NA	0	NA	0	0	0	0	0	0	0	0	0	0	0	0	0	0
SEVENTH	unclassified_Ferrimicrobium	10	1	0	0	0	0	0	0	0	0	0	0	0	NA	0	NA	0	0	0	0	0	0	0	0	0	0	0	0	0	0
SIXTH	Ferrithrix	1	1	0	0	0	0	0	0	0	0	0	0	0	NA	0	NA	0	0	0	0	0	0	0	0	0	0	0	0	0	0
FIFTH	Candidatus_Poriferisodalaceae	1	1	0	0	0	0	0	0	0	0	0	0	0	NA	0	NA	0	0	0	0	0	0	0	0	0	0	0	0	0	0
SIXTH	Candidatus_Poriferisodalis	1	1	0	0	0	0	0	0	0	0	0	0	0	NA	0	NA	0	0	0	0	0	0	0	0	0	0	0	0	0	0
FIFTH	Iamiaceae	9	9	0	0	0	0	0	0	0	0	0	0	0	NA	0	NA	0	0	0	0	0	0	0	0	0	0	0	0	0	0
SIXTH	Actinomarinicola	1	1	0	0	0	0	0	0	0	0	0	0	0	NA	0	NA	0	0	0	0	0	0	0	0	0	0	0	0	0	0
SIXTH	Aquihabitans	1	1	0	0	0	0	0	0	0	0	0	0	0	NA	0	NA	0	0	0	0	0	0	0	0	0	0	0	0	0	0
SEVENTH	unclassified_Aquihabitans	1	1	0	0	0	0	0	0	0	0	0	0	0	NA	0	NA	0	0	0	0	0	0	0	0	0	0	0	0	0	0
SIXTH	Dermatobacter	1	1	0	0	0	0	0	0	0	0	0	0	0	NA	0	NA	0	0	0	0	0	0	0	0	0	0	0	0	0	0
SIXTH	Iamia	3	3	0	0	0	0	0	0	0	0	0	0	0	NA	0	NA	0	0	0	0	0	0	0	0	0	0	0	0	0	0
SEVENTH	unclassified_Iamia	2	2	0	0	0	0	0	0	0	0	0	0	0	NA	0	NA	0	0	0	0	0	0	0	0	0	0	0	0	0	0
SIXTH	Rhabdothermincola	3	3	0	0	0	0	0	0	0	0	0	0	0	NA	0	NA	0	0	0	0	0	0	0	0	0	0	0	0	0	0
SEVENTH	unclassified_Rhabdothermincola	1	1	0	0	0	0	0	0	0	0	0	0	0	NA	0	NA	0	0	0	0	0	0	0	0	0	0	0	0	0	0
FIFTH	Ilumatobacteraceae	12	5	0	0	0	0	0	0	0	0	0	0	0	NA	0	NA	0	0	0	0	0	0	0	0	0	0	0	0	0	0
SIXTH	Desertimonas	2	1	0	0	0	0	0	0	0	0	0	0	0	NA	0	NA	0	0	0	0	0	0	0	0	0	0	0	0	0	0
SIXTH	Ilumatobacter	10	4	0	0	0	0	0	0	0	0	0	0	0	NA	0	NA	0	0	0	0	0	0	0	0	0	0	0	0	0	0
SEVENTH	unclassified_Ilumatobacter	6	1	0	0	0	0	0	0	0	0	0	0	0	NA	0	NA	0	0	0	0	0	0	0	0	0	0	0	0	0	0
FIFTH	Microthrixaceae	18	3	0	0	0	0	0	0	0	0	0	0	0	NA	0	NA	0	0	0	0	0	0	0	0	0	0	0	0	0	0
SIXTH	Candidatus_Microthrix	18	3	0	0	0	0	0	0	0	0	0	0	0	NA	0	NA	0	0	0	0	0	0	0	0	0	0	0	0	0	0
SEVENTH	environmental_samples	1	1	0	0	0	0	0	0	0	0	0	0	0	NA	0	NA	0	0	0	0	0	0	0	0	0	0	0	0	0	0
SEVENTH	unclassified_Candidatus_Microthrix	15	1	0	0	0	0	0	0	0	0	0	0	0	NA	0	NA	0	0	0	0	0	0	0	0	0	0	0	0	0	0
THIRD	Actinomycetes	35367	11944	21549	20073	56.7563	6486	54.3034	21337	19907	56.2869	6420	53.7508	1817	0.0851572	2266	0.1062	21157	19845	56.1116	6382	53.4327	1757	2189	20514	19322	54.6328	6073	50.8456	1589	1996
FORTH	Acidothermales	1	1	0	0	0	0	0	0	0	0	0	0	0	NA	0	NA	0	0	0	0	0	0	0	0	0	0	0	0	0	0
FIFTH	Acidothermaceae	1	1	0	0	0	0	0	0	0	0	0	0	0	NA	0	NA	0	0	0	0	0	0	0	0	0	0	0	0	0	0
SIXTH	Acidothermus	1	1	0	0	0	0	0	0	0	0	0	0	0	NA	0	NA	0	0	0	0	0	0	0	0	0	0	0	0	0	0
FORTH	Actinomycetales	837	219	0	0	0	0	0	0	0	0	0	0	0	NA	0	NA	0	0	0	0	0	0	0	0	0	0	0	0	0	0
FIFTH	Actinomycetaceae	837	219	0	0	0	0	0	0	0	0	0	0	0	NA	0	NA	0	0	0	0	0	0	0	0	0	0	0	0	0	0
SIXTH	Actinobaculum	15	6	0	0	0	0	0	0	0	0	0	0	0	NA	0	NA	0	0	0	0	0	0	0	0	0	0	0	0	0	0
SEVENTH	environmental_samples	1	1	0	0	0	0	0	0	0	0	0	0	0	NA	0	NA	0	0	0	0	0	0	0	0	0	0	0	0	0	0
SEVENTH	unclassified_Actinobaculum	3	3	0	0	0	0	0	0	0	0	0	0	0	NA	0	NA	0	0	0	0	0	0	0	0	0	0	0	0	0	0
SIXTH	Actinomyces	312	97	0	0	0	0	0	0	0	0	0	0	0	NA	0	NA	0	0	0	0	0	0	0	0	0	0	0	0	0	0
SEVENTH	environmental_samples	42	1	0	0	0	0	0	0	0	0	0	0	0	NA	0	NA	0	0	0	0	0	0	0	0	0	0	0	0	0	0
SEVENTH	unclassified_Actinomyces	74	49	0	0	0	0	0	0	0	0	0	0	0	NA	0	NA	0	0	0	0	0	0	0	0	0	0	0	0	0	0
SIXTH	Actinotignum	65	5	0	0	0	0	0	0	0	0	0	0	0	NA	0	NA	0	0	0	0	0	0	0	0	0	0	0	0	0	0
SEVENTH	unclassified_Actinotignum	1	1	0	0	0	0	0	0	0	0	0	0	0	NA	0	NA	0	0	0	0	0	0	0	0	0	0	0	0	0	0
SIXTH	Ancrocorticia	2	1	0	0	0	0	0	0	0	0	0	0	0	NA	0	NA	0	0	0	0	0	0	0	0	0	0	0	0	0	0
SIXTH	Arcanobacterium	62	14	0	0	0	0	0	0	0	0	0	0	0	NA	0	NA	0	0	0	0	0	0	0	0	0	0	0	0	0	0
SEVENTH	environmental_samples	1	1	0	0	0	0	0	0	0	0	0	0	0	NA	0	NA	0	0	0	0	0	0	0	0	0	0	0	0	0	0
SEVENTH	unclassified_Arcanobacterium	1	1	0	0	0	0	0	0	0	0	0	0	0	NA	0	NA	0	0	0	0	0	0	0	0	0	0	0	0	0	0
SIXTH	Boudabousia	4	3	0	0	0	0	0	0	0	0	0	0	0	NA	0	NA	0	0	0	0	0	0	0	0	0	0	0	0	0	0
SIXTH	Bowdeniella	3	2	0	0	0	0	0	0	0	0	0	0	0	NA	0	NA	0	0	0	0	0	0	0	0	0	0	0	0	0	0
SIXTH	Buchananella	8	5	0	0	0	0	0	0	0	0	0	0	0	NA	0	NA	0	0	0	0	0	0	0	0	0	0	0	0	0	0
SEVENTH	unclassified_Buchananella	4	4	0	0	0	0	0	0	0	0	0	0	0	NA	0	NA	0	0	0	0	0	0	0	0	0	0	0	0	0	0
SIXTH	Changpingibacter	2	1	0	0	0	0	0	0	0	0	0	0	0	NA	0	NA	0	0	0	0	0	0	0	0	0	0	0	0	0	0
SIXTH	Flaviflexus	9	6	0	0	0	0	0	0	0	0	0	0	0	NA	0	NA	0	0	0	0	0	0	0	0	0	0	0	0	0	0
SEVENTH	unclassified_Flaviflexus	1	1	0	0	0	0	0	0	0	0	0	0	0	NA	0	NA	0	0	0	0	0	0	0	0	0	0	0	0	0	0
SIXTH	Gleimia	8	4	0	0	0	0	0	0	0	0	0	0	0	NA	0	NA	0	0	0	0	0	0	0	0	0	0	0	0	0	0
SEVENTH	unclassified_Gleimia	1	1	0	0	0	0	0	0	0	0	0	0	0	NA	0	NA	0	0	0	0	0	0	0	0	0	0	0	0	0	0
SIXTH	Mobiluncus	74	7	0	0	0	0	0	0	0	0	0	0	0	NA	0	NA	0	0	0	0	0	0	0	0	0	0	0	0	0	0
SEVENTH	environmental_samples	10	1	0	0	0	0	0	0	0	0	0	0	0	NA	0	NA	0	0	0	0	0	0	0	0	0	0	0	0	0	0
SEVENTH	unclassified_Mobiluncus	2	1	0	0	0	0	0	0	0	0	0	0	0	NA	0	NA	0	0	0	0	0	0	0	0	0	0	0	0	0	0
SIXTH	Nanchangia	2	1	0	0	0	0	0	0	0	0	0	0	0	NA	0	NA	0	0	0	0	0	0	0	0	0	0	0	0	0	0
SIXTH	Neoactinobaculum	1	1	0	0	0	0	0	0	0	0	0	0	0	NA	0	NA	0	0	0	0	0	0	0	0	0	0	0	0	0	0
SIXTH	Pauljensenia	12	12	0	0	0	0	0	0	0	0	0	0	0	NA	0	NA	0	0	0	0	0	0	0	0	0	0	0	0	0	0
SEVENTH	unclassified_Pauljensenia	11	11	0	0	0	0	0	0	0	0	0	0	0	NA	0	NA	0	0	0	0	0	0	0	0	0	0	0	0	0	0
SIXTH	Peptidiphaga	1	1	0	0	0	0	0	0	0	0	0	0	0	NA	0	NA	0	0	0	0	0	0	0	0	0	0	0	0	0	0
SIXTH	Schaalia	66	21	0	0	0	0	0	0	0	0	0	0	0	NA	0	NA	0	0	0	0	0	0	0	0	0	0	0	0	0	0
SEVENTH	unclassified_Schaalia	10	10	0	0	0	0	0	0	0	0	0	0	0	NA	0	NA	0	0	0	0	0	0	0	0	0	0	0	0	0	0
SIXTH	Scrofimicrobium	2	2	0	0	0	0	0	0	0	0	0	0	0	NA	0	NA	0	0	0	0	0	0	0	0	0	0	0	0	0	0
SEVENTH	unclassified_Scrofimicrobium	1	1	0	0	0	0	0	0	0	0	0	0	0	NA	0	NA	0	0	0	0	0	0	0	0	0	0	0	0	0	0
SIXTH	Trueperella	123	10	0	0	0	0	0	0	0	0	0	0	0	NA	0	NA	0	0	0	0	0	0	0	0	0	0	0	0	0	0
SEVENTH	unclassified_Trueperella	6	4	0	0	0	0	0	0	0	0	0	0	0	NA	0	NA	0	0	0	0	0	0	0	0	0	0	0	0	0	0
SIXTH	Varibaculum	41	7	0	0	0	0	0	0	0	0	0	0	0	NA	0	NA	0	0	0	0	0	0	0	0	0	0	0	0	0	0
SEVENTH	environmental_samples	9	1	0	0	0	0	0	0	0	0	0	0	0	NA	0	NA	0	0	0	0	0	0	0	0	0	0	0	0	0	0
SEVENTH	unclassified_Varibaculum	3	1	0	0	0	0	0	0	0	0	0	0	0	NA	0	NA	0	0	0	0	0	0	0	0	0	0	0	0	0	0
SIXTH	Winkia	25	13	0	0	0	0	0	0	0	0	0	0	0	NA	0	NA	0	0	0	0	0	0	0	0	0	0	0	0	0	0
SEVENTH	unclassified_Winkia	12	12	0	0	0	0	0	0	0	0	0	0	0	NA	0	NA	0	0	0	0	0	0	0	0	0	0	0	0	0	0
FORTH	Actinomycetes_incertae_sedis	2	1	2	2	100	1	100	2	2	100	1	100	1	0.5	1	0.5	2	2	100	1	100	1	1	2	2	100	1	100	1	1
FIFTH	Halopolyspora	2	1	2	2	100	1	100	2	2	100	1	100	1	0.5	1	0.5	2	2	100	1	100	1	1	2	2	100	1	100	1	1
FORTH	Actinopolysporales	14	12	14	14	100	12	100	14	14	100	12	100	5	0.357143	5	0.357143	14	14	100	12	100	5	5	12	12	85.7143	11	91.6667	4	4
FIFTH	Actinopolysporaceae	14	12	14	14	100	12	100	14	14	100	12	100	5	0.357143	5	0.357143	14	14	100	12	100	5	5	12	12	85.7143	11	91.6667	4	4
SIXTH	Actinopolyspora	13	11	13	13	100	11	100	13	13	100	11	100	4	0.307692	4	0.307692	13	13	100	11	100	4	4	11	11	84.6154	10	90.9091	3	3
SEVENTH	unclassified_Actinopolyspora	2	2	2	2	100	2	100	2	2	100	2	100	1	0.5	1	0.5	2	2	100	2	100	1	1	2	2	100	2	100	1	1
SIXTH	Haloactinomyces	1	1	1	1	100	1	100	1	1	100	1	100	1	1	1	1	1	1	100	1	100	1	1	1	1	100	1	100	1	1
FORTH	Bifidobacteriales	3062	216	11	11	0.359242	6	2.77778	9	9	0.293926	4	1.85185	3	0.333333	3	0.333333	9	9	0.293926	4	1.85185	3	3	7	7	0.228609	4	1.85185	2	2
FIFTH	Bifidobacteriaceae	3062	216	11	11	0.359242	6	2.77778	9	9	0.293926	4	1.85185	3	0.333333	3	0.333333	9	9	0.293926	4	1.85185	3	3	7	7	0.228609	4	1.85185	2	2
SIXTH	Aeriscardovia	2	1	0	0	0	0	0	0	0	0	0	0	0	NA	0	NA	0	0	0	0	0	0	0	0	0	0	0	0	0	0
SIXTH	Alloscardovia	30	5	0	0	0	0	0	0	0	0	0	0	0	NA	0	NA	0	0	0	0	0	0	0	0	0	0	0	0	0	0
SEVENTH	unclassified_Alloscardovia	1	1	0	0	0	0	0	0	0	0	0	0	0	NA	0	NA	0	0	0	0	0	0	0	0	0	0	0	0	0	0
SIXTH	Bifidobacterium	2884	190	11	11	0.381415	6	3.15789	9	9	0.312067	4	2.10526	3	0.333333	3	0.333333	9	9	0.312067	4	2.10526	3	3	7	7	0.242718	4	2.10526	2	2
SEVENTH	environmental_samples	47	1	0	0	0	0	0	0	0	0	0	0	0	NA	0	NA	0	0	0	0	0	0	0	0	0	0	0	0	0	0
SEVENTH	unclassified_Bifidobacterium	117	84	0	0	0	0	0	0	0	0	0	0	0	NA	0	NA	0	0	0	0	0	0	0	0	0	0	0	0	0	0
SIXTH	Bombiscardovia	2	2	0	0	0	0	0	0	0	0	0	0	0	NA	0	NA	0	0	0	0	0	0	0	0	0	0	0	0	0	0
SIXTH	Galliscardovia	1	1	0	0	0	0	0	0	0	0	0	0	0	NA	0	NA	0	0	0	0	0	0	0	0	0	0	0	0	0	0
SIXTH	Gardnerella	130	12	0	0	0	0	0	0	0	0	0	0	0	NA	0	NA	0	0	0	0	0	0	0	0	0	0	0	0	0	0
SEVENTH	environmental_samples	4	1	0	0	0	0	0	0	0	0	0	0	0	NA	0	NA	0	0	0	0	0	0	0	0	0	0	0	0	0	0
SEVENTH	unclassified_Gardnerella	5	5	0	0	0	0	0	0	0	0	0	0	0	NA	0	NA	0	0	0	0	0	0	0	0	0	0	0	0	0	0
SIXTH	Parascardovia	5	1	0	0	0	0	0	0	0	0	0	0	0	NA	0	NA	0	0	0	0	0	0	0	0	0	0	0	0	0	0
SIXTH	Pseudoscardovia	3	2	0	0	0	0	0	0	0	0	0	0	0	NA	0	NA	0	0	0	0	0	0	0	0	0	0	0	0	0	0
SIXTH	Scardovia	5	2	0	0	0	0	0	0	0	0	0	0	0	NA	0	NA	0	0	0	0	0	0	0	0	0	0	0	0	0	0
FORTH	Candidatus_Nanopelagicales	16	9	0	0	0	0	0	0	0	0	0	0	0	NA	0	NA	0	0	0	0	0	0	0	0	0	0	0	0	0	0
FIFTH	Candidatus_Nanopelagicaceae	16	9	0	0	0	0	0	0	0	0	0	0	0	NA	0	NA	0	0	0	0	0	0	0	0	0	0	0	0	0	0
SIXTH	Candidatus_Nanopelagicus	3	3	0	0	0	0	0	0	0	0	0	0	0	NA	0	NA	0	0	0	0	0	0	0	0	0	0	0	0	0	0
SIXTH	Candidatus_Planktophila	13	6	0	0	0	0	0	0	0	0	0	0	0	NA	0	NA	0	0	0	0	0	0	0	0	0	0	0	0	0	0
FORTH	Catenulisporales	25	18	16	16	64	13	72.2222	16	16	64	13	72.2222	9	0.5625	10	0.625	15	15	60	13	72.2222	8	9	15	15	60	13	72.2222	8	9
FIFTH	Actinospicaceae	12	7	7	7	58.3333	6	85.7143	7	7	58.3333	6	85.7143	6	0.857143	7	1	6	6	50	6	85.7143	5	6	6	6	50	6	85.7143	5	6
SIXTH	Actinocrinis	6	2	1	1	16.6667	1	50	1	1	16.6667	1	50	1	1	1	1	1	1	16.6667	1	50	1	1	1	1	16.6667	1	50	1	1
SEVENTH	unclassified_Actinocrinis	5	1	1	1	20	1	100	1	1	20	1	100	1	1	1	1	1	1	20	1	100	1	1	1	1	20	1	100	1	1
SIXTH	Actinospica	6	5	6	6	100	5	100	6	6	100	5	100	5	0.833333	6	1	5	5	83.3333	5	100	4	5	5	5	83.3333	5	100	4	5
SEVENTH	unclassified_Actinospica	1	1	1	1	100	1	100	1	1	100	1	100	1	1	1	1	1	1	100	1	100	1	1	1	1	100	1	100	1	1
FIFTH	Catenulisporaceae	13	11	9	9	69.2308	7	63.6364	9	9	69.2308	7	63.6364	4	0.444444	3	0.333333	9	9	69.2308	7	63.6364	4	3	9	9	69.2308	7	63.6364	4	3
SIXTH	Catenulispora	13	11	9	9	69.2308	7	63.6364	9	9	69.2308	7	63.6364	4	0.444444	3	0.333333	9	9	69.2308	7	63.6364	4	3	9	9	69.2308	7	63.6364	4	3
SEVENTH	unclassified_Catenulispora	5	5	4	4	80	4	80	4	4	80	4	80	2	0.5	2	0.5	4	4	80	4	80	2	2	4	4	80	4	80	2	2
FORTH	Cryptosporangiales	5	5	5	4	80	4	80	4	4	80	4	80	3	0.75	3	0.75	4	4	80	4	80	3	3	2	2	40	2	40	2	2
FIFTH	Cryptosporangiaceae	5	5	5	4	80	4	80	4	4	80	4	80	3	0.75	3	0.75	4	4	80	4	80	3	3	2	2	40	2	40	2	2
SIXTH	Cryptosporangium	5	5	5	4	80	4	80	4	4	80	4	80	3	0.75	3	0.75	4	4	80	4	80	3	3	2	2	40	2	40	2	2
FORTH	Frankiales	90	74	5	5	5.55556	4	5.40541	4	4	4.44444	3	4.05405	3	0.75	3	0.75	4	4	4.44444	3	4.05405	3	3	0	0	0	0	0	0	0
FIFTH	Frankiaceae	90	74	5	5	5.55556	4	5.40541	4	4	4.44444	3	4.05405	3	0.75	3	0.75	4	4	4.44444	3	4.05405	3	3	0	0	0	0	0	0	0
SIXTH	Frankia	63	49	5	5	7.93651	4	8.16327	4	4	6.34921	3	6.12245	3	0.75	3	0.75	4	4	6.34921	3	6.12245	3	3	0	0	0	0	0	0	0
SEVENTH	unclassified_Frankia	42	39	2	2	4.7619	2	5.12821	1	1	2.38095	1	2.5641	1	1	1	1	1	1	2.38095	1	2.5641	1	1	0	0	0	0	0	0	0
SIXTH	Parafrankia	12	12	0	0	0	0	0	0	0	0	0	0	0	NA	0	NA	0	0	0	0	0	0	0	0	0	0	0	0	0	0
SEVENTH	unclassified_Parafrankia	7	7	0	0	0	0	0	0	0	0	0	0	0	NA	0	NA	0	0	0	0	0	0	0	0	0	0	0	0	0	0
SIXTH	Protofrankia	8	6	0	0	0	0	0	0	0	0	0	0	0	NA	0	NA	0	0	0	0	0	0	0	0	0	0	0	0	0	0
SEVENTH	unclassified_Protofrankia	3	3	0	0	0	0	0	0	0	0	0	0	0	NA	0	NA	0	0	0	0	0	0	0	0	0	0	0	0	0	0
SIXTH	Pseudofrankia	7	7	0	0	0	0	0	0	0	0	0	0	0	NA	0	NA	0	0	0	0	0	0	0	0	0	0	0	0	0	0
SEVENTH	unclassified_Pseudofrankia	4	4	0	0	0	0	0	0	0	0	0	0	0	NA	0	NA	0	0	0	0	0	0	0	0	0	0	0	0	0	0
FORTH	Geodermatophilales	131	105	31	30	22.9008	27	25.7143	31	30	22.9008	27	25.7143	14	0.451613	20	0.645161	31	30	22.9008	27	25.7143	14	20	28	27	20.6107	24	22.8571	12	18
FIFTH	Antricoccaceae	1	1	0	0	0	0	0	0	0	0	0	0	0	NA	0	NA	0	0	0	0	0	0	0	0	0	0	0	0	0	0
SIXTH	Antricoccus	1	1	0	0	0	0	0	0	0	0	0	0	0	NA	0	NA	0	0	0	0	0	0	0	0	0	0	0	0	0	0
FIFTH	Geodermatophilaceae	130	104	31	30	23.0769	27	25.9615	31	30	23.0769	27	25.9615	14	0.451613	20	0.645161	31	30	23.0769	27	25.9615	14	20	28	27	20.7692	24	23.0769	12	18
SIXTH	Blastococcus	44	40	5	5	11.3636	5	12.5	5	5	11.3636	5	12.5	4	0.8	5	1	5	5	11.3636	5	12.5	4	5	5	5	11.3636	5	12.5	4	5
SEVENTH	unclassified_Blastococcus	25	25	2	2	8	2	8	2	2	8	2	8	2	1	2	1	2	2	8	2	8	2	2	2	2	8	2	8	2	2
SIXTH	Cumulibacter	2	2	0	0	0	0	0	0	0	0	0	0	0	NA	0	NA	0	0	0	0	0	0	0	0	0	0	0	0	0	0
SIXTH	Geodermatophilus	33	26	9	9	27.2727	9	34.6154	9	9	27.2727	9	34.6154	5	0.555556	6	0.666667	9	9	27.2727	9	34.6154	5	6	6	6	18.1818	6	23.0769	3	4
SEVENTH	unclassified_Geodermatophilus	9	9	3	3	33.3333	3	33.3333	3	3	33.3333	3	33.3333	3	1	3	1	3	3	33.3333	3	33.3333	3	3	2	2	22.2222	2	22.2222	2	2
SIXTH	Goekera	4	1	0	0	0	0	0	0	0	0	0	0	0	NA	0	NA	0	0	0	0	0	0	0	0	0	0	0	0	0	0
SIXTH	Klenkia	9	7	7	7	77.7778	5	71.4286	7	7	77.7778	5	71.4286	3	0.428571	4	0.571429	7	7	77.7778	5	71.4286	3	4	7	7	77.7778	5	71.4286	3	4
SEVENTH	unclassified_Klenkia	1	1	0	0	0	0	0	0	0	0	0	0	0	NA	0	NA	0	0	0	0	0	0	0	0	0	0	0	0	0	0
SIXTH	Modestobacter	36	26	10	9	25	8	30.7692	10	9	25	8	30.7692	2	0.2	5	0.5	10	9	25	8	30.7692	2	5	10	9	25	8	30.7692	2	5
SEVENTH	environmental_samples	1	1	1	1	100	1	100	1	1	100	1	100	1	1	1	1	1	1	100	1	100	1	1	1	1	100	1	100	1	1
SEVENTH	unclassified_Modestobacter	17	17	6	5	29.4118	5	29.4118	6	5	29.4118	5	29.4118	2	0.333333	3	0.5	6	5	29.4118	5	29.4118	2	3	6	5	29.4118	5	29.4118	2	3
SIXTH	Petropleomorpha	1	1	0	0	0	0	0	0	0	0	0	0	0	NA	0	NA	0	0	0	0	0	0	0	0	0	0	0	0	0	0
SIXTH	Trujillonella	1	1	0	0	0	0	0	0	0	0	0	0	0	NA	0	NA	0	0	0	0	0	0	0	0	0	0	0	0	0	0
FORTH	Glycomycetales	43	35	4	4	9.30233	3	8.57143	4	4	9.30233	3	8.57143	3	0.75	3	0.75	4	4	9.30233	3	8.57143	3	3	4	4	9.30233	3	8.57143	3	3
FIFTH	Glycomycetaceae	43	35	4	4	9.30233	3	8.57143	4	4	9.30233	3	8.57143	3	0.75	3	0.75	4	4	9.30233	3	8.57143	3	3	4	4	9.30233	3	8.57143	3	3
SIXTH	Glycomyces	36	29	0	0	0	0	0	0	0	0	0	0	0	NA	0	NA	0	0	0	0	0	0	0	0	0	0	0	0	0	0
SEVENTH	unclassified_Glycomyces	9	9	0	0	0	0	0	0	0	0	0	0	0	NA	0	NA	0	0	0	0	0	0	0	0	0	0	0	0	0	0
SIXTH	Haloglycomyces	1	1	0	0	0	0	0	0	0	0	0	0	0	NA	0	NA	0	0	0	0	0	0	0	0	0	0	0	0	0	0
SIXTH	Natronoglycomyces	1	1	1	1	100	1	100	1	1	100	1	100	1	1	1	1	1	1	100	1	100	1	1	1	1	100	1	100	1	1
SIXTH	Stackebrandtia	5	4	3	3	60	2	50	3	3	60	2	50	2	0.666667	2	0.666667	3	3	60	2	50	2	2	3	3	60	2	50	2	2
SEVENTH	unclassified_Stackebrandtia	1	1	0	0	0	0	0	0	0	0	0	0	0	NA	0	NA	0	0	0	0	0	0	0	0	0	0	0	0	0	0
FORTH	Jatrophihabitantales	12	7	0	0	0	0	0	0	0	0	0	0	0	NA	0	NA	0	0	0	0	0	0	0	0	0	0	0	0	0	0
FIFTH	Jatrophihabitantaceae	12	7	0	0	0	0	0	0	0	0	0	0	0	NA	0	NA	0	0	0	0	0	0	0	0	0	0	0	0	0	0
SIXTH	Jatrophihabitans	12	7	0	0	0	0	0	0	0	0	0	0	0	NA	0	NA	0	0	0	0	0	0	0	0	0	0	0	0	0	0
SEVENTH	environmental_samples	4	1	0	0	0	0	0	0	0	0	0	0	0	NA	0	NA	0	0	0	0	0	0	0	0	0	0	0	0	0	0
SEVENTH	unclassified_Jatrophihabitans	4	3	0	0	0	0	0	0	0	0	0	0	0	NA	0	NA	0	0	0	0	0	0	0	0	0	0	0	0	0	0
FORTH	Jiangellales	23	20	32	21	91.3043	18	90	31	20	86.9565	17	85	11	0.354839	12	0.387097	29	18	78.2609	15	75	9	10	29	18	78.2609	15	75	9	10
FIFTH	Jiangellaceae	23	20	32	21	91.3043	18	90	31	20	86.9565	17	85	11	0.354839	12	0.387097	29	18	78.2609	15	75	9	10	29	18	78.2609	15	75	9	10
SIXTH	Haloactinopolyspora	3	2	3	3	100	2	100	3	3	100	2	100	2	0.666667	2	0.666667	3	3	100	2	100	2	2	3	3	100	2	100	2	2
SEVENTH	unclassified_Haloactinopolyspora	1	1	1	1	100	1	100	1	1	100	1	100	1	1	1	1	1	1	100	1	100	1	1	1	1	100	1	100	1	1
SIXTH	Jiangella	14	12	24	13	92.8571	11	91.6667	23	12	85.7143	10	83.3333	4	0.173913	5	0.217391	23	12	85.7143	10	83.3333	4	5	23	12	85.7143	10	83.3333	4	5
SEVENTH	unclassified_Jiangella	1	1	2	1	100	1	100	2	1	100	1	100	2	1	2	1	2	1	100	1	100	2	2	2	1	100	1	100	2	2
SIXTH	Phytoactinopolyspora	6	6	5	5	83.3333	5	83.3333	5	5	83.3333	5	83.3333	5	1	5	1	3	3	50	3	50	3	3	3	3	50	3	50	3	3
FORTH	Kineosporiales	48	39	31	27	56.25	23	58.9744	31	27	56.25	23	58.9744	19	0.612903	22	0.709677	30	26	54.1667	22	56.4103	19	21	30	26	54.1667	22	56.4103	19	21
FIFTH	Kineosporiaceae	48	39	31	27	56.25	23	58.9744	31	27	56.25	23	58.9744	19	0.612903	22	0.709677	30	26	54.1667	22	56.4103	19	21	30	26	54.1667	22	56.4103	19	21
SIXTH	Angustibacter	2	2	1	1	50	1	50	1	1	50	1	50	1	1	1	1	1	1	50	1	50	1	1	1	1	50	1	50	1	1
SEVENTH	unclassified_Angustibacter	1	1	1	1	100	1	100	1	1	100	1	100	1	1	1	1	1	1	100	1	100	1	1	1	1	100	1	100	1	1
SIXTH	Kineococcus	20	17	16	16	80	13	76.4706	16	16	80	13	76.4706	8	0.5	11	0.6875	15	15	75	12	70.5882	8	10	15	15	75	12	70.5882	8	10
SEVENTH	unclassified_Kineococcus	5	5	3	3	60	3	60	3	3	60	3	60	2	0.666667	3	1	2	2	40	2	40	2	2	2	2	40	2	40	2	2
SIXTH	Kineosporia	10	9	12	8	80	7	77.7778	12	8	80	7	77.7778	8	0.666667	8	0.666667	12	8	80	7	77.7778	8	8	12	8	80	7	77.7778	8	8
SEVENTH	unclassified_Kineosporia	4	4	3	2	50	2	50	3	2	50	2	50	3	1	3	1	3	2	50	2	50	3	3	3	2	50	2	50	3	3
SIXTH	Pseudokineococcus	10	6	1	1	10	1	16.6667	1	1	10	1	16.6667	1	1	1	1	1	1	10	1	16.6667	1	1	1	1	10	1	16.6667	1	1
SEVENTH	environmental_samples	3	1	0	0	0	0	0	0	0	0	0	0	0	NA	0	NA	0	0	0	0	0	0	0	0	0	0	0	0	0	0
SEVENTH	unclassified_Pseudokineococcus	2	2	0	0	0	0	0	0	0	0	0	0	0	NA	0	NA	0	0	0	0	0	0	0	0	0	0	0	0	0	0
SIXTH	Quadrisphaera	6	5	1	1	16.6667	1	20	1	1	16.6667	1	20	1	1	1	1	1	1	16.6667	1	20	1	1	1	1	16.6667	1	20	1	1
SEVENTH	unclassified_Quadrisphaera	3	3	1	1	33.3333	1	33.3333	1	1	33.3333	1	33.3333	1	1	1	1	1	1	33.3333	1	33.3333	1	1	1	1	33.3333	1	33.3333	1	1
FORTH	Kitasatosporales	6343	4029	5966	5370	84.6603	3380	83.8918	5907	5335	84.1085	3357	83.3209	614	0.103944	853	0.144405	5881	5321	83.8878	3351	83.172	594	831	5600	5099	80.3878	3197	79.3497	529	751
FIFTH	Carbonactinosporaceae	4	1	0	0	0	0	0	0	0	0	0	0	0	NA	0	NA	0	0	0	0	0	0	0	0	0	0	0	0	0	0
SIXTH	Carbonactinospora	4	1	0	0	0	0	0	0	0	0	0	0	0	NA	0	NA	0	0	0	0	0	0	0	0	0	0	0	0	0	0
FIFTH	Streptomycetaceae	6339	4028	5966	5370	84.7137	3380	83.9126	5907	5335	84.1615	3357	83.3416	614	0.103944	853	0.144405	5881	5321	83.9407	3351	83.1927	594	831	5600	5099	80.4386	3197	79.3694	529	751
SIXTH	Actinacidiphila	26	14	8	7	26.9231	4	28.5714	8	7	26.9231	4	28.5714	5	0.625	6	0.75	7	6	23.0769	4	28.5714	4	5	7	6	23.0769	4	28.5714	4	5
SEVENTH	unclassified_Actinacidiphila	1	1	0	0	0	0	0	0	0	0	0	0	0	NA	0	NA	0	0	0	0	0	0	0	0	0	0	0	0	0	0
SIXTH	Allostreptomyces	1	1	1	1	100	1	100	1	1	100	1	100	1	1	1	1	1	1	100	1	100	1	1	1	1	100	1	100	1	1
SIXTH	Embleya	5	4	5	5	100	4	100	5	5	100	4	100	2	0.4	2	0.4	5	5	100	4	100	2	2	5	5	100	4	100	2	2
SEVENTH	unclassified_Embleya	2	2	2	2	100	2	100	2	2	100	2	100	2	1	2	1	2	2	100	2	100	2	2	2	2	100	2	100	2	2
SIXTH	Kitasatospora	180	127	169	164	91.1111	118	92.9134	169	164	91.1111	118	92.9134	37	0.218935	58	0.343195	168	163	90.5556	118	92.9134	36	57	161	156	86.6667	111	87.4016	33	54
SEVENTH	unclassified_Kitasatospora	94	94	89	86	91.4894	86	91.4894	89	86	91.4894	86	91.4894	26	0.292135	41	0.460674	89	86	91.4894	86	91.4894	26	41	85	82	87.234	82	87.234	25	40
SIXTH	Mangrovactinospora	1	1	0	0	0	0	0	0	0	0	0	0	0	NA	0	NA	0	0	0	0	0	0	0	0	0	0	0	0	0	0
SIXTH	Peterkaempfera	2	2	0	0	0	0	0	0	0	0	0	0	0	NA	0	NA	0	0	0	0	0	0	0	0	0	0	0	0	0	0
SIXTH	Phaeacidiphilus	1	1	1	1	100	1	100	1	1	100	1	100	1	1	1	1	1	1	100	1	100	1	1	1	1	100	1	100	1	1
SIXTH	Streptacidiphilus	23	21	11	11	47.8261	10	47.619	11	11	47.8261	10	47.619	6	0.545455	7	0.636364	11	11	47.8261	10	47.619	6	7	11	11	47.8261	10	47.619	6	7
SEVENTH	unclassified_Streptacidiphilus	11	11	5	5	45.4545	5	45.4545	5	5	45.4545	5	45.4545	3	0.6	3	0.6	5	5	45.4545	5	45.4545	3	3	5	5	45.4545	5	45.4545	3	3
SIXTH	Streptantibioticus	9	5	15	9	100	5	100	15	9	100	5	100	8	0.533333	8	0.533333	13	9	100	5	100	7	7	10	8	88.8889	4	80	5	5
SIXTH	Streptodolium	1	1	1	1	100	1	100	1	1	100	1	100	1	1	1	1	1	1	100	1	100	1	1	1	1	100	1	100	1	1
SIXTH	Streptomyces	6083	3845	5749	5165	84.9088	3231	84.0312	5691	5131	84.3498	3209	83.459	568	0.0998067	784	0.137761	5669	5119	84.1526	3203	83.303	551	765	5398	4905	80.6346	3057	79.5059	491	689
SEVENTH	environmental_samples	2	1	3	2	100	1	100	3	2	100	1	100	3	1	3	1	3	2	100	1	100	3	3	2	2	100	1	100	2	2
SEVENTH	unclassified_	0	0	0	0	0	0	0	0	0	NA	0	NA	0	0	0	0	0	0	0	0	0	0
SEVENTH	unclassified_Streptomyces	3146	3110	2883	2619	83.2486	2591	83.3119	2852	2599	82.6128	2571	82.6688	482	0.169004	630	0.220898	2842	2596	82.5175	2568	82.5723	473	621	2693	2466	78.3853	2440	78.4566	424	567
SIXTH	Wenjunlia	3	2	2	2	66.6667	1	50	2	2	66.6667	1	50	1	0.5	1	0.5	2	2	66.6667	1	50	1	1	2	2	66.6667	1	50	1	1
SIXTH	Yinghuangia	4	4	4	4	100	4	100	3	3	75	3	75	3	1	3	1	3	3	75	3	75	3	3	3	3	75	3	75	3	3
SEVENTH	unclassified_Yinghuangia	1	1	1	1	100	1	100	1	1	100	1	100	1	1	1	1	1	1	100	1	100	1	1	1	1	100	1	100	1	1
FORTH	Micrococcales	5455	3024	1141	1123	20.5866	699	23.1151	1098	1082	19.835	689	22.7844	267	0.243169	296	0.269581	1092	1076	19.725	685	22.6521	264	293	951	940	17.2319	630	20.8333	231	259
FIFTH	Beutenbergiaceae	10	7	0	0	0	0	0	0	0	0	0	0	0	NA	0	NA	0	0	0	0	0	0	0	0	0	0	0	0	0	0
SIXTH	Beutenbergia	1	1	0	0	0	0	0	0	0	0	0	0	0	NA	0	NA	0	0	0	0	0	0	0	0	0	0	0	0	0	0
SIXTH	Litorihabitans	1	1	0	0	0	0	0	0	0	0	0	0	0	NA	0	NA	0	0	0	0	0	0	0	0	0	0	0	0	0	0
SIXTH	Miniimonas	3	2	0	0	0	0	0	0	0	0	0	0	0	NA	0	NA	0	0	0	0	0	0	0	0	0	0	0	0	0	0
SEVENTH	unclassified_Miniimonas	1	1	0	0	0	0	0	0	0	0	0	0	0	NA	0	NA	0	0	0	0	0	0	0	0	0	0	0	0	0	0
SIXTH	Salana	2	1	0	0	0	0	0	0	0	0	0	0	0	NA	0	NA	0	0	0	0	0	0	0	0	0	0	0	0	0	0
SIXTH	Serinibacter	3	2	0	0	0	0	0	0	0	0	0	0	0	NA	0	NA	0	0	0	0	0	0	0	0	0	0	0	0	0	0
FIFTH	Bogoriellaceae	32	24	2	2	6.25	1	4.16667	2	2	6.25	1	4.16667	1	0.5	1	0.5	2	2	6.25	1	4.16667	1	1	2	2	6.25	1	4.16667	1	1
SIXTH	Bogoriella	1	1	0	0	0	0	0	0	0	0	0	0	0	NA	0	NA	0	0	0	0	0	0	0	0	0	0	0	0	0	0
SIXTH	Georgenia	31	23	2	2	6.45161	1	4.34783	2	2	6.45161	1	4.34783	1	0.5	1	0.5	2	2	6.45161	1	4.34783	1	1	2	2	6.45161	1	4.34783	1	1
SEVENTH	environmental_samples	1	1	0	0	0	0	0	0	0	0	0	0	0	NA	0	NA	0	0	0	0	0	0	0	0	0	0	0	0	0	0
SEVENTH	unclassified_Georgenia	10	10	0	0	0	0	0	0	0	0	0	0	0	NA	0	NA	0	0	0	0	0	0	0	0	0	0	0	0	0	0
FIFTH	Brevibacteriaceae	200	85	105	104	52	41	48.2353	105	104	52	41	48.2353	19	0.180952	22	0.209524	104	103	51.5	40	47.0588	18	21	103	102	51	40	47.0588	18	21
SIXTH	Brevibacterium	194	82	104	103	53.0928	40	48.7805	104	103	53.0928	40	48.7805	18	0.173077	21	0.201923	103	102	52.5773	39	47.561	17	20	102	101	52.0619	39	47.561	17	20
SEVENTH	environmental_samples	3	1	0	0	0	0	0	0	0	0	0	0	0	NA	0	NA	0	0	0	0	0	0	0	0	0	0	0	0	0	0
SEVENTH	unclassified_Brevibacterium	47	43	21	20	42.5532	19	44.186	21	20	42.5532	19	44.186	13	0.619048	13	0.619048	20	19	40.4255	18	41.8605	12	12	20	19	40.4255	18	41.8605	12	12
SIXTH	Saxibacter	1	1	1	1	100	1	100	1	1	100	1	100	1	1	1	1	1	1	100	1	100	1	1	1	1	100	1	100	1	1
SIXTH	Sediminivirga	3	1	0	0	0	0	0	0	0	0	0	0	0	NA	0	NA	0	0	0	0	0	0	0	0	0	0	0	0	0	0
SIXTH	Spelaeicoccus	2	1	0	0	0	0	0	0	0	0	0	0	0	NA	0	NA	0	0	0	0	0	0	0	0	0	0	0	0	0	0
FIFTH	Cellulomonadaceae	194	126	66	64	32.9897	45	35.7143	65	63	32.4742	44	34.9206	28	0.430769	30	0.461538	64	62	31.9588	44	34.9206	27	29	56	54	27.8351	40	31.746	20	22
SIXTH	Actinotalea	19	15	13	11	57.8947	9	60	13	11	57.8947	9	60	10	0.769231	10	0.769231	13	11	57.8947	9	60	10	10	11	9	47.3684	8	53.3333	8	8
SEVENTH	environmental_samples	1	1	1	1	100	1	100	1	1	100	1	100	1	1	1	1	1	1	100	1	100	1	1	1	1	100	1	100	1	1
SEVENTH	unclassified_Actinotalea	8	7	4	3	37.5	3	42.8571	4	3	37.5	3	42.8571	4	1	4	1	4	3	37.5	3	42.8571	4	4	4	3	37.5	3	42.8571	4	4
SIXTH	Cellulomonas	146	91	45	45	30.8219	29	31.8681	44	44	30.137	28	30.7692	16	0.363636	18	0.409091	43	43	29.4521	28	30.7692	15	17	37	37	25.3425	25	27.4725	10	12
SEVENTH	environmental_samples	3	1	0	0	0	0	0	0	0	0	0	0	0	NA	0	NA	0	0	0	0	0	0	0	0	0	0	0	0	0	0
SEVENTH	unclassified_Cellulomonas	50	43	15	15	30	13	30.2326	14	14	28	12	27.907	8	0.571429	9	0.642857	14	14	28	12	27.907	8	9	12	12	24	10	23.2558	6	7
SIXTH	Oerskovia	20	13	8	8	40	7	53.8462	8	8	40	7	53.8462	2	0.25	2	0.25	8	8	40	7	53.8462	2	2	8	8	40	7	53.8462	2	2
SEVENTH	unclassified_Oerskovia	4	4	2	2	50	2	50	2	2	50	2	50	1	0.5	1	0.5	2	2	50	2	50	1	1	2	2	50	2	50	1	1
SIXTH	Paraoerskovia	3	2	0	0	0	0	0	0	0	0	0	0	0	NA	0	NA	0	0	0	0	0	0	0	0	0	0	0	0	0	0
SIXTH	Pseudactinotalea	4	4	0	0	0	0	0	0	0	0	0	0	0	NA	0	NA	0	0	0	0	0	0	0	0	0	0	0	0	0	0
SEVENTH	unclassified_Pseudactinotalea	2	2	0	0	0	0	0	0	0	0	0	0	0	NA	0	NA	0	0	0	0	0	0	0	0	0	0	0	0	0	0
SIXTH	Sediminihabitans	2	1	0	0	0	0	0	0	0	0	0	0	0	NA	0	NA	0	0	0	0	0	0	0	0	0	0	0	0	0	0
FIFTH	Demequinaceae	51	38	2	2	3.92157	2	5.26316	2	2	3.92157	2	5.26316	2	1	2	1	2	2	3.92157	2	5.26316	2	2	1	1	1.96078	1	2.63158	1	1
SIXTH	Demequina	51	38	2	2	3.92157	2	5.26316	2	2	3.92157	2	5.26316	2	1	2	1	2	2	3.92157	2	5.26316	2	2	1	1	1.96078	1	2.63158	1	1
SEVENTH	environmental_samples	1	1	0	0	0	0	0	0	0	0	0	0	0	NA	0	NA	0	0	0	0	0	0	0	0	0	0	0	0	0	0
SEVENTH	unclassified_Demequina	13	11	0	0	0	0	0	0	0	0	0	0	0	NA	0	NA	0	0	0	0	0	0	0	0	0	0	0	0	0	0
FIFTH	Dermabacteraceae	125	63	12	12	9.6	9	14.2857	12	12	9.6	9	14.2857	4	0.333333	3	0.25	12	12	9.6	9	14.2857	4	3	12	12	9.6	9	14.2857	4	3
SIXTH	Brachybacterium	85	50	12	12	14.1176	9	18	12	12	14.1176	9	18	4	0.333333	3	0.25	12	12	14.1176	9	18	4	3	12	12	14.1176	9	18	4	3
SEVENTH	environmental_samples	1	1	0	0	0	0	0	0	0	0	0	0	0	NA	0	NA	0	0	0	0	0	0	0	0	0	0	0	0	0	0
SEVENTH	unclassified_Brachybacterium	24	22	4	4	16.6667	4	18.1818	4	4	16.6667	4	18.1818	3	0.75	3	0.75	4	4	16.6667	4	18.1818	3	3	4	4	16.6667	4	18.1818	3	3
SIXTH	Dermabacter	32	10	0	0	0	0	0	0	0	0	0	0	0	NA	0	NA	0	0	0	0	0	0	0	0	0	0	0	0	0	0
SEVENTH	unclassified_Dermabacter	8	7	0	0	0	0	0	0	0	0	0	0	0	NA	0	NA	0	0	0	0	0	0	0	0	0	0	0	0	0	0
SIXTH	Devriesea	1	1	0	0	0	0	0	0	0	0	0	0	0	NA	0	NA	0	0	0	0	0	0	0	0	0	0	0	0	0	0
SIXTH	Helcobacillus	7	2	0	0	0	0	0	0	0	0	0	0	0	NA	0	NA	0	0	0	0	0	0	0	0	0	0	0	0	0	0
SEVENTH	unclassified_Helcobacillus	1	1	0	0	0	0	0	0	0	0	0	0	0	NA	0	NA	0	0	0	0	0	0	0	0	0	0	0	0	0	0
FIFTH	Dermacoccaceae	66	41	4	4	6.06061	4	9.7561	4	4	6.06061	4	9.7561	4	1	4	1	4	4	6.06061	4	9.7561	4	4	4	4	6.06061	4	9.7561	4	4
SIXTH	Allobranchiibius	4	4	0	0	0	0	0	0	0	0	0	0	0	NA	0	NA	0	0	0	0	0	0	0	0	0	0	0	0	0	0
SEVENTH	unclassified_Allobranchiibius	3	3	0	0	0	0	0	0	0	0	0	0	0	NA	0	NA	0	0	0	0	0	0	0	0	0	0	0	0	0	0
SIXTH	Barrientosiimonas	3	2	0	0	0	0	0	0	0	0	0	0	0	NA	0	NA	0	0	0	0	0	0	0	0	0	0	0	0	0	0
SIXTH	Branchiibius	3	2	0	0	0	0	0	0	0	0	0	0	0	NA	0	NA	0	0	0	0	0	0	0	0	0	0	0	0	0	0
SEVENTH	unclassified_Branchiibius	1	1	0	0	0	0	0	0	0	0	0	0	0	NA	0	NA	0	0	0	0	0	0	0	0	0	0	0	0	0	0
SIXTH	Calidifontibacter	1	1	0	0	0	0	0	0	0	0	0	0	0	NA	0	NA	0	0	0	0	0	0	0	0	0	0	0	0	0	0
SIXTH	Demetria	1	1	0	0	0	0	0	0	0	0	0	0	0	NA	0	NA	0	0	0	0	0	0	0	0	0	0	0	0	0	0
SIXTH	Dermacoccus	34	14	0	0	0	0	0	0	0	0	0	0	0	NA	0	NA	0	0	0	0	0	0	0	0	0	0	0	0	0	0
SEVENTH	environmental_samples	1	1	0	0	0	0	0	0	0	0	0	0	0	NA	0	NA	0	0	0	0	0	0	0	0	0	0	0	0	0	0
SEVENTH	unclassified_Dermacoccus	9	9	0	0	0	0	0	0	0	0	0	0	0	NA	0	NA	0	0	0	0	0	0	0	0	0	0	0	0	0	0
SIXTH	Flexivirga	7	6	1	1	14.2857	1	16.6667	1	1	14.2857	1	16.6667	1	1	1	1	1	1	14.2857	1	16.6667	1	1	1	1	14.2857	1	16.6667	1	1
SEVENTH	unclassified_Flexivirga	1	1	0	0	0	0	0	0	0	0	0	0	0	NA	0	NA	0	0	0	0	0	0	0	0	0	0	0	0	0	0
SIXTH	Leekyejoonella	1	1	1	1	100	1	100	1	1	100	1	100	1	1	1	1	1	1	100	1	100	1	1	1	1	100	1	100	1	1
SIXTH	Luteipulveratus	4	4	2	2	50	2	50	2	2	50	2	50	2	1	2	1	2	2	50	2	50	2	2	2	2	50	2	50	2	2
SEVENTH	unclassified_Luteipulveratus	2	2	0	0	0	0	0	0	0	0	0	0	0	NA	0	NA	0	0	0	0	0	0	0	0	0	0	0	0	0	0
SIXTH	Metallococcus	1	1	0	0	0	0	0	0	0	0	0	0	0	NA	0	NA	0	0	0	0	0	0	0	0	0	0	0	0	0	0
SIXTH	Rudaeicoccus	1	1	0	0	0	0	0	0	0	0	0	0	0	NA	0	NA	0	0	0	0	0	0	0	0	0	0	0	0	0	0
SIXTH	Yimella	6	4	0	0	0	0	0	0	0	0	0	0	0	NA	0	NA	0	0	0	0	0	0	0	0	0	0	0	0	0	0
SEVENTH	unclassified_Yimella	4	3	0	0	0	0	0	0	0	0	0	0	0	NA	0	NA	0	0	0	0	0	0	0	0	0	0	0	0	0	0
FIFTH	Dermatophilaceae	59	11	0	0	0	0	0	0	0	0	0	0	0	NA	0	NA	0	0	0	0	0	0	0	0	0	0	0	0	0	0
SIXTH	Agilicoccus	1	1	0	0	0	0	0	0	0	0	0	0	0	NA	0	NA	0	0	0	0	0	0	0	0	0	0	0	0	0	0
SIXTH	Austwickia	4	2	0	0	0	0	0	0	0	0	0	0	0	NA	0	NA	0	0	0	0	0	0	0	0	0	0	0	0	0	0
SEVENTH	unclassified_Austwickia	1	1	0	0	0	0	0	0	0	0	0	0	0	NA	0	NA	0	0	0	0	0	0	0	0	0	0	0	0	0	0
SIXTH	Dermatophilus	43	1	0	0	0	0	0	0	0	0	0	0	0	NA	0	NA	0	0	0	0	0	0	0	0	0	0	0	0	0	0
SIXTH	Gephyromycinifex	1	1	0	0	0	0	0	0	0	0	0	0	0	NA	0	NA	0	0	0	0	0	0	0	0	0	0	0	0	0	0
SIXTH	Kineosphaera	2	1	0	0	0	0	0	0	0	0	0	0	0	NA	0	NA	0	0	0	0	0	0	0	0	0	0	0	0	0	0
SIXTH	Mobilicoccus	7	4	0	0	0	0	0	0	0	0	0	0	0	NA	0	NA	0	0	0	0	0	0	0	0	0	0	0	0	0	0
SEVENTH	unclassified_Mobilicoccus	3	1	0	0	0	0	0	0	0	0	0	0	0	NA	0	NA	0	0	0	0	0	0	0	0	0	0	0	0	0	0
SIXTH	Piscicoccus	1	1	0	0	0	0	0	0	0	0	0	0	0	NA	0	NA	0	0	0	0	0	0	0	0	0	0	0	0	0	0
FIFTH	Intrasporangiaceae	195	124	11	11	5.64103	9	7.25806	11	11	5.64103	9	7.25806	6	0.545455	6	0.545455	11	11	5.64103	9	7.25806	6	6	9	9	4.61538	7	5.64516	4	4
SIXTH	Aquipuribacter	3	3	1	1	33.3333	1	33.3333	1	1	33.3333	1	33.3333	1	1	1	1	1	1	33.3333	1	33.3333	1	1	0	0	0	0	0	0	0
SEVENTH	unclassified_Aquipuribacter	1	1	0	0	0	0	0	0	0	0	0	0	0	NA	0	NA	0	0	0	0	0	0	0	0	0	0	0	0	0	0
SIXTH	Arsenicicoccus	15	9	0	0	0	0	0	0	0	0	0	0	0	NA	0	NA	0	0	0	0	0	0	0	0	0	0	0	0	0	0
SEVENTH	environmental_samples	2	1	0	0	0	0	0	0	0	0	0	0	0	NA	0	NA	0	0	0	0	0	0	0	0	0	0	0	0	0	0
SEVENTH	unclassified_Arsenicicoccus	4	4	0	0	0	0	0	0	0	0	0	0	0	NA	0	NA	0	0	0	0	0	0	0	0	0	0	0	0	0	0
SIXTH	Fodinibacter	1	1	0	0	0	0	0	0	0	0	0	0	0	NA	0	NA	0	0	0	0	0	0	0	0	0	0	0	0	0	0
SIXTH	Humibacillus	4	2	0	0	0	0	0	0	0	0	0	0	0	NA	0	NA	0	0	0	0	0	0	0	0	0	0	0	0	0	0
SEVENTH	unclassified_Humibacillus	1	1	0	0	0	0	0	0	0	0	0	0	0	NA	0	NA	0	0	0	0	0	0	0	0	0	0	0	0	0	0
SIXTH	Intrasporangium	15	7	0	0	0	0	0	0	0	0	0	0	0	NA	0	NA	0	0	0	0	0	0	0	0	0	0	0	0	0	0
SEVENTH	unclassified_Intrasporangium	9	3	0	0	0	0	0	0	0	0	0	0	0	NA	0	NA	0	0	0	0	0	0	0	0	0	0	0	0	0	0
SIXTH	Janibacter	53	22	4	4	7.54717	3	13.6364	4	4	7.54717	3	13.6364	1	0.25	1	0.25	4	4	7.54717	3	13.6364	1	1	4	4	7.54717	3	13.6364	1	1
SEVENTH	unclassified_Janibacter	11	11	2	2	18.1818	2	18.1818	2	2	18.1818	2	18.1818	1	0.5	1	0.5	2	2	18.1818	2	18.1818	1	1	2	2	18.1818	2	18.1818	1	1
SIXTH	Knoellia	13	11	0	0	0	0	0	0	0	0	0	0	0	NA	0	NA	0	0	0	0	0	0	0	0	0	0	0	0	0	0
SEVENTH	unclassified_Knoellia	4	4	0	0	0	0	0	0	0	0	0	0	0	NA	0	NA	0	0	0	0	0	0	0	0	0	0	0	0	0	0
SIXTH	Kribbia	1	1	0	0	0	0	0	0	0	0	0	0	0	NA	0	NA	0	0	0	0	0	0	0	0	0	0	0	0	0	0
SIXTH	Lapillicoccus	5	2	2	2	40	1	50	2	2	40	1	50	1	0.5	1	0.5	2	2	40	1	50	1	1	2	2	40	1	50	1	1
SEVENTH	unclassified_Lapillicoccus	3	1	0	0	0	0	0	0	0	0	0	0	0	NA	0	NA	0	0	0	0	0	0	0	0	0	0	0	0	0	0
SIXTH	Marihabitans	2	1	0	0	0	0	0	0	0	0	0	0	0	NA	0	NA	0	0	0	0	0	0	0	0	0	0	0	0	0	0
SIXTH	Nostocoides	9	9	0	0	0	0	0	0	0	0	0	0	0	NA	0	NA	0	0	0	0	0	0	0	0	0	0	0	0	0	0
SEVENTH	unclassified_Nostocoides	4	4	0	0	0	0	0	0	0	0	0	0	0	NA	0	NA	0	0	0	0	0	0	0	0	0	0	0	0	0	0
SIXTH	Ornithinibacter	3	2	0	0	0	0	0	0	0	0	0	0	0	NA	0	NA	0	0	0	0	0	0	0	0	0	0	0	0	0	0
SEVENTH	unclassified_Ornithinibacter	1	1	0	0	0	0	0	0	0	0	0	0	0	NA	0	NA	0	0	0	0	0	0	0	0	0	0	0	0	0	0
SIXTH	Ornithinicoccus	3	2	0	0	0	0	0	0	0	0	0	0	0	NA	0	NA	0	0	0	0	0	0	0	0	0	0	0	0	0	0
SIXTH	Oryzihumus	3	2	0	0	0	0	0	0	0	0	0	0	0	NA	0	NA	0	0	0	0	0	0	0	0	0	0	0	0	0	0
SEVENTH	unclassified_Oryzihumus	1	1	0	0	0	0	0	0	0	0	0	0	0	NA	0	NA	0	0	0	0	0	0	0	0	0	0	0	0	0	0
SIXTH	Pedococcus	10	8	0	0	0	0	0	0	0	0	0	0	0	NA	0	NA	0	0	0	0	0	0	0	0	0	0	0	0	0	0
SEVENTH	unclassified_Pedococcus	3	2	0	0	0	0	0	0	0	0	0	0	0	NA	0	NA	0	0	0	0	0	0	0	0	0	0	0	0	0	0
SIXTH	Phycicoccus	30	21	3	3	10	3	14.2857	3	3	10	3	14.2857	3	1	3	1	3	3	10	3	14.2857	3	3	3	3	10	3	14.2857	3	3
SEVENTH	environmental_samples	1	1	0	0	0	0	0	0	0	0	0	0	0	NA	0	NA	0	0	0	0	0	0	0	0	0	0	0	0	0	0
SEVENTH	unclassified_Phycicoccus	15	12	1	1	6.66667	1	8.33333	1	1	6.66667	1	8.33333	1	1	1	1	1	1	6.66667	1	8.33333	1	1	1	1	6.66667	1	8.33333	1	1
SIXTH	Segeticoccus	3	2	1	1	33.3333	1	50	1	1	33.3333	1	50	1	1	1	1	1	1	33.3333	1	50	1	1	0	0	0	0	0	0	0
SEVENTH	unclassified_Segeticoccus	1	1	0	0	0	0	0	0	0	0	0	0	0	NA	0	NA	0	0	0	0	0	0	0	0	0	0	0	0	0	0
SIXTH	Terrabacter	18	17	0	0	0	0	0	0	0	0	0	0	0	NA	0	NA	0	0	0	0	0	0	0	0	0	0	0	0	0	0
SEVENTH	unclassified_Terrabacter	10	10	0	0	0	0	0	0	0	0	0	0	0	NA	0	NA	0	0	0	0	0	0	0	0	0	0	0	0	0	0
SIXTH	Terracoccus	4	2	0	0	0	0	0	0	0	0	0	0	0	NA	0	NA	0	0	0	0	0	0	0	0	0	0	0	0	0	0
SEVENTH	unclassified_Terracoccus	1	1	0	0	0	0	0	0	0	0	0	0	0	NA	0	NA	0	0	0	0	0	0	0	0	0	0	0	0	0	0
FIFTH	Jonesiaceae	9	5	0	0	0	0	0	0	0	0	0	0	0	NA	0	NA	0	0	0	0	0	0	0	0	0	0	0	0	0	0
SIXTH	Flavimobilis	4	3	0	0	0	0	0	0	0	0	0	0	0	NA	0	NA	0	0	0	0	0	0	0	0	0	0	0	0	0	0
SIXTH	Jonesia	5	2	0	0	0	0	0	0	0	0	0	0	0	NA	0	NA	0	0	0	0	0	0	0	0	0	0	0	0	0	0
FIFTH	Kytococcaceae	10	4	0	0	0	0	0	0	0	0	0	0	0	NA	0	NA	0	0	0	0	0	0	0	0	0	0	0	0	0	0
SIXTH	Kytococcus	10	4	0	0	0	0	0	0	0	0	0	0	0	NA	0	NA	0	0	0	0	0	0	0	0	0	0	0	0	0	0
SEVENTH	unclassified_Kytococcus	1	1	0	0	0	0	0	0	0	0	0	0	0	NA	0	NA	0	0	0	0	0	0	0	0	0	0	0	0	0	0
FIFTH	Microbacteriaceae	2467	1521	841	826	33.482	510	33.5306	801	788	31.9416	503	33.0703	161	0.200999	182	0.227216	797	784	31.7795	500	32.8731	159	180	674	666	26.9964	456	29.9803	139	159
SIXTH	Agreia	12	10	12	12	100	10	100	12	12	100	10	100	2	0.166667	3	0.25	12	12	100	10	100	2	3	12	12	100	10	100	2	3
SEVENTH	unclassified_Agreia	8	8	8	8	100	8	100	8	8	100	8	100	2	0.25	3	0.375	8	8	100	8	100	2	3	8	8	100	8	100	2	3
SIXTH	Agrococcus	29	25	0	0	0	0	0	0	0	0	0	0	0	NA	0	NA	0	0	0	0	0	0	0	0	0	0	0	0	0	0
SEVENTH	environmental_samples	1	1	0	0	0	0	0	0	0	0	0	0	0	NA	0	NA	0	0	0	0	0	0	0	0	0	0	0	0	0	0
SEVENTH	unclassified_Agrococcus	12	12	0	0	0	0	0	0	0	0	0	0	0	NA	0	NA	0	0	0	0	0	0	0	0	0	0	0	0	0	0
SIXTH	Agromyces	100	71	35	35	35	31	43.662	35	35	35	31	43.662	20	0.571429	20	0.571429	35	35	35	31	43.662	20	20	33	33	33	29	40.8451	18	18
SEVENTH	unclassified_Agromyces	29	29	17	17	58.6207	17	58.6207	17	17	58.6207	17	58.6207	11	0.647059	11	0.647059	17	17	58.6207	17	58.6207	11	11	16	16	55.1724	16	55.1724	10	10
SIXTH	Alpinimonas	1	1	0	0	0	0	0	0	0	0	0	0	0	NA	0	NA	0	0	0	0	0	0	0	0	0	0	0	0	0	0
SIXTH	Amnibacterium	11	7	2	2	18.1818	2	28.5714	2	2	18.1818	2	28.5714	2	1	2	1	2	2	18.1818	2	28.5714	2	2	2	2	18.1818	2	28.5714	2	2
SEVENTH	environmental_samples	3	1	0	0	0	0	0	0	0	0	0	0	0	NA	0	NA	0	0	0	0	0	0	0	0	0	0	0	0	0	0
SEVENTH	unclassified_Amnibacterium	3	2	0	0	0	0	0	0	0	0	0	0	0	NA	0	NA	0	0	0	0	0	0	0	0	0	0	0	0	0	0
SIXTH	Antiquaquibacter	2	1	0	0	0	0	0	0	0	0	0	0	0	NA	0	NA	0	0	0	0	0	0	0	0	0	0	0	0	0	0
SIXTH	Arenivirga	1	1	1	1	100	1	100	1	1	100	1	100	1	1	1	1	1	1	100	1	100	1	1	0	0	0	0	0	0	0
SIXTH	Aurantimicrobium	20	6	0	0	0	0	0	0	0	0	0	0	0	NA	0	NA	0	0	0	0	0	0	0	0	0	0	0	0	0	0
SEVENTH	environmental_samples	1	1	0	0	0	0	0	0	0	0	0	0	0	NA	0	NA	0	0	0	0	0	0	0	0	0	0	0	0	0	0
SEVENTH	unclassified_Aurantimicrobium	6	3	0	0	0	0	0	0	0	0	0	0	0	NA	0	NA	0	0	0	0	0	0	0	0	0	0	0	0	0	0
SIXTH	Canibacter	5	3	0	0	0	0	0	0	0	0	0	0	0	NA	0	NA	0	0	0	0	0	0	0	0	0	0	0	0	0	0
SIXTH	Clavibacter	191	16	163	161	84.2932	13	81.25	135	135	70.6806	13	81.25	5	0.037037	5	0.037037	134	134	70.1571	13	81.25	5	5	117	117	61.2565	12	75	3	4
SEVENTH	unclassified_Clavibacter	8	8	7	7	87.5	7	87.5	7	7	87.5	7	87.5	2	0.285714	2	0.285714	7	7	87.5	7	87.5	2	2	6	6	75	6	75	1	1
SIXTH	Cnuibacter	3	1	0	0	0	0	0	0	0	0	0	0	0	NA	0	NA	0	0	0	0	0	0	0	0	0	0	0	0	0	0
SIXTH	Compostimonas	1	1	1	1	100	1	100	0	0	0	0	0	0	NA	0	NA	0	0	0	0	0	0	0	0	0	0	0	0	0	0
SIXTH	Conyzicola	3	2	3	3	100	2	100	3	3	100	2	100	2	0.666667	3	1	3	3	100	2	100	2	3	3	3	100	2	100	2	3
SIXTH	Cryobacterium	136	121	19	17	12.5	14	11.5702	19	17	12.5	14	11.5702	7	0.368421	7	0.368421	19	17	12.5	14	11.5702	7	7	13	11	8.08824	10	8.26446	7	7
SEVENTH	unclassified_Cryobacterium	91	87	9	8	8.79121	8	9.1954	9	8	8.79121	8	9.1954	6	0.666667	6	0.666667	9	8	8.79121	8	9.1954	6	6	7	6	6.59341	6	6.89655	6	6
SIXTH	Cryocola	1	1	1	1	100	1	100	1	1	100	1	100	1	1	1	1	1	1	100	1	100	1	1	1	1	100	1	100	1	1
SEVENTH	unclassified_Cryocola	1	1	1	1	100	1	100	1	1	100	1	100	1	1	1	1	1	1	100	1	100	1	1	1	1	100	1	100	1	1
SIXTH	Curtobacterium	290	180	282	281	96.8966	174	96.6667	276	275	94.8276	173	96.1111	31	0.112319	40	0.144928	275	274	94.4828	172	95.5556	30	39	219	218	75.1724	152	84.4444	27	35
SEVENTH	environmental_samples	1	1	1	1	100	1	100	1	1	100	1	100	1	1	1	1	1	1	100	1	100	1	1	1	1	100	1	100	1	1
SEVENTH	unclassified_Curtobacterium	167	165	163	162	97.006	160	96.9697	162	161	96.4072	159	96.3636	30	0.185185	36	0.222222	161	160	95.8084	158	95.7576	29	35	142	141	84.4311	139	84.2424	27	32
SIXTH	Diaminobutyricibacter	2	2	0	0	0	0	0	0	0	0	0	0	0	NA	0	NA	0	0	0	0	0	0	0	0	0	0	0	0	0	0
SEVENTH	unclassified_Diaminobutyricibacter	1	1	0	0	0	0	0	0	0	0	0	0	0	NA	0	NA	0	0	0	0	0	0	0	0	0	0	0	0	0	0
SIXTH	Diaminobutyricimonas	3	3	1	1	33.3333	1	33.3333	1	1	33.3333	1	33.3333	1	1	1	1	1	1	33.3333	1	33.3333	1	1	1	1	33.3333	1	33.3333	1	1
SEVENTH	unclassified_Diaminobutyricimonas	2	2	0	0	0	0	0	0	0	0	0	0	0	NA	0	NA	0	0	0	0	0	0	0	0	0	0	0	0	0	0
SIXTH	Frigoribacterium	50	45	46	46	92	41	91.1111	46	46	92	41	91.1111	6	0.130435	7	0.152174	46	46	92	41	91.1111	6	7	46	46	92	41	91.1111	6	7
SEVENTH	environmental_samples	1	1	0	0	0	0	0	0	0	0	0	0	0	NA	0	NA	0	0	0	0	0	0	0	0	0	0	0	0	0	0
SEVENTH	unclassified_Frigoribacterium	42	42	39	39	92.8571	39	92.8571	39	39	92.8571	39	92.8571	5	0.128205	6	0.153846	39	39	92.8571	39	92.8571	5	6	39	39	92.8571	39	92.8571	5	6
SIXTH	Frondihabitans	11	11	10	10	90.9091	10	90.9091	10	10	90.9091	10	90.9091	7	0.7	7	0.7	10	10	90.9091	10	90.9091	7	7	10	10	90.9091	10	90.9091	7	7
SEVENTH	unclassified_Frondihabitans	7	7	6	6	85.7143	6	85.7143	6	6	85.7143	6	85.7143	3	0.5	3	0.5	6	6	85.7143	6	85.7143	3	3	6	6	85.7143	6	85.7143	3	3
SIXTH	Galbitalea	3	2	0	0	0	0	0	0	0	0	0	0	0	NA	0	NA	0	0	0	0	0	0	0	0	0	0	0	0	0	0
SEVENTH	unclassified_Galbitalea	1	1	0	0	0	0	0	0	0	0	0	0	0	NA	0	NA	0	0	0	0	0	0	0	0	0	0	0	0	0	0
SIXTH	Glaciibacter	2	2	0	0	0	0	0	0	0	0	0	0	0	NA	0	NA	0	0	0	0	0	0	0	0	0	0	0	0	0	0
SIXTH	Glaciihabitans	6	6	2	1	16.6667	1	16.6667	2	1	16.6667	1	16.6667	2	1	2	1	2	1	16.6667	1	16.6667	2	2	1	1	16.6667	1	16.6667	1	1
SEVENTH	unclassified_Glaciihabitans	4	4	2	1	25	1	25	2	1	25	1	25	2	1	2	1	2	1	25	1	25	2	2	1	1	25	1	25	1	1
SIXTH	Gryllotalpicola	6	6	1	1	16.6667	1	16.6667	1	1	16.6667	1	16.6667	1	1	1	1	1	1	16.6667	1	16.6667	1	1	1	1	16.6667	1	16.6667	1	1
SEVENTH	unclassified_Gryllotalpicola	1	1	0	0	0	0	0	0	0	0	0	0	0	NA	0	NA	0	0	0	0	0	0	0	0	0	0	0	0	0	0
SIXTH	Gulosibacter	18	11	0	0	0	0	0	0	0	0	0	0	0	NA	0	NA	0	0	0	0	0	0	0	0	0	0	0	0	0	0
SEVENTH	environmental_samples	1	1	0	0	0	0	0	0	0	0	0	0	0	NA	0	NA	0	0	0	0	0	0	0	0	0	0	0	0	0	0
SEVENTH	unclassified_Gulosibacter	2	2	0	0	0	0	0	0	0	0	0	0	0	NA	0	NA	0	0	0	0	0	0	0	0	0	0	0	0	0	0
SIXTH	Herbiconiux	27	21	7	7	25.9259	6	28.5714	7	7	25.9259	6	28.5714	5	0.714286	5	0.714286	7	7	25.9259	6	28.5714	5	5	7	7	25.9259	6	28.5714	5	5
SEVENTH	unclassified_Herbiconiux	15	13	5	5	33.3333	5	38.4615	5	5	33.3333	5	38.4615	4	0.8	4	0.8	5	5	33.3333	5	38.4615	4	4	5	5	33.3333	5	38.4615	4	4
SIXTH	Homoserinibacter	3	3	0	0	0	0	0	0	0	0	0	0	0	NA	0	NA	0	0	0	0	0	0	0	0	0	0	0	0	0	0
SEVENTH	unclassified_Homoserinibacter	2	2	0	0	0	0	0	0	0	0	0	0	0	NA	0	NA	0	0	0	0	0	0	0	0	0	0	0	0	0	0
SIXTH	Homoserinimonas	2	2	0	0	0	0	0	0	0	0	0	0	0	NA	0	NA	0	0	0	0	0	0	0	0	0	0	0	0	0	0
SEVENTH	unclassified_Homoserinimonas	1	1	0	0	0	0	0	0	0	0	0	0	0	NA	0	NA	0	0	0	0	0	0	0	0	0	0	0	0	0	0
SIXTH	Humibacter	4	4	2	2	50	2	50	2	2	50	2	50	2	1	2	1	2	2	50	2	50	2	2	2	2	50	2	50	2	2
SEVENTH	unclassified_Humibacter	2	2	1	1	50	1	50	1	1	50	1	50	1	1	1	1	1	1	50	1	50	1	1	1	1	50	1	50	1	1
SIXTH	Klugiella	2	1	0	0	0	0	0	0	0	0	0	0	0	NA	0	NA	0	0	0	0	0	0	0	0	0	0	0	0	0	0
SIXTH	Labedella	5	4	2	2	40	2	50	2	2	40	2	50	2	1	2	1	2	2	40	2	50	2	2	2	2	40	2	50	2	2
SIXTH	Lacisediminihabitans	5	3	0	0	0	0	0	0	0	0	0	0	0	NA	0	NA	0	0	0	0	0	0	0	0	0	0	0	0	0	0
SEVENTH	unclassified_Lacisediminihabitans	3	1	0	0	0	0	0	0	0	0	0	0	0	NA	0	NA	0	0	0	0	0	0	0	0	0	0	0	0	0	0
SIXTH	Leifsonia	69	52	34	34	49.2754	26	50	34	34	49.2754	26	50	9	0.264706	10	0.294118	34	34	49.2754	26	50	9	10	33	33	47.8261	26	50	8	9
SEVENTH	environmental_samples	3	1	3	3	100	1	100	3	3	100	1	100	3	1	3	1	3	3	100	1	100	3	3	2	2	66.6667	1	100	2	2
SEVENTH	unclassified_Leifsonia	40	39	20	20	50	20	51.2821	20	20	50	20	51.2821	4	0.2	5	0.25	20	20	50	20	51.2821	4	5	20	20	50	20	51.2821	4	5
SIXTH	Leucobacter	94	75	1	1	1.06383	1	1.33333	1	1	1.06383	1	1.33333	1	1	1	1	1	1	1.06383	1	1.33333	1	1	1	1	1.06383	1	1.33333	1	1
SEVENTH	unclassified_Leucobacter	43	43	0	0	0	0	0	0	0	0	0	0	0	NA	0	NA	0	0	0	0	0	0	0	0	0	0	0	0	0	0
SIXTH	Luna_cluster	13	9	0	0	0	0	0	0	0	0	0	0	0	NA	0	NA	0	0	0	0	0	0	0	0	0	0	0	0	0	0
SEVENTH	Luna	13	9	0	0	0	0	0	0	0	0	0	0	0	NA	0	NA	0	0	0	0	0	0	0	0	0	0	0	0	0	0
EIGHTH	1_subcluster	13	9	0	0	0	0	0	0	0	0	0	0	0	NA	0	NA	0	0	0	0	0	0	0	0	0	0	0	0	0	0
NINTH	Aquiluna	4	4	0	0	0	0	0	0	0	0	0	0	0	NA	0	NA	0	0	0	0	0	0	0	0	0	0	0	0	0	0
NINTH	Rhodoluna	9	5	0	0	0	0	0	0	0	0	0	0	0	NA	0	NA	0	0	0	0	0	0	0	0	0	0	0	0	0	0
SIXTH	Lysinibacter	2	2	1	1	50	1	50	1	1	50	1	50	1	1	1	1	1	1	50	1	50	1	1	1	1	50	1	50	1	1
SEVENTH	unclassified_Lysinibacter	1	1	1	1	100	1	100	1	1	100	1	100	1	1	1	1	1	1	100	1	100	1	1	1	1	100	1	100	1	1
SIXTH	Marisediminicola	3	3	1	1	33.3333	1	33.3333	1	1	33.3333	1	33.3333	1	1	1	1	1	1	33.3333	1	33.3333	1	1	1	1	33.3333	1	33.3333	1	1
SEVENTH	unclassified_Marisediminicola	1	1	0	0	0	0	0	0	0	0	0	0	0	NA	0	NA	0	0	0	0	0	0	0	0	0	0	0	0	0	0
SIXTH	Microbacterium	931	548	66	63	6.76692	42	7.66423	62	59	6.33727	38	6.93431	24	0.387097	26	0.419355	62	59	6.33727	38	6.93431	24	26	37	37	3.97422	32	5.83942	19	21
SEVENTH	environmental_samples	48	1	3	3	6.25	1	100	3	3	6.25	1	100	3	1	3	1	3	3	6.25	1	100	3	3	3	3	6.25	1	100	3	3
SEVENTH	unclassified_Microbacterium	468	404	29	26	5.55556	26	6.43564	27	24	5.12821	24	5.94059	14	0.518519	14	0.518519	27	24	5.12821	24	5.94059	14	14	22	22	4.70085	22	5.44554	12	12
SIXTH	Microcella	27	13	8	6	22.2222	4	30.7692	8	6	22.2222	4	30.7692	4	0.5	4	0.5	8	6	22.2222	4	30.7692	4	4	8	6	22.2222	4	30.7692	4	4
SEVENTH	unclassified_Microcella	8	4	4	2	25	2	50	4	2	25	2	50	2	0.5	2	0.5	4	2	25	2	50	2	2	4	2	25	2	50	2	2
SIXTH	Microterricola	4	3	0	0	0	0	0	0	0	0	0	0	0	NA	0	NA	0	0	0	0	0	0	0	0	0	0	0	0	0	0
SIXTH	Mycetocola	18	14	10	9	50	7	50	10	9	50	7	50	4	0.4	4	0.4	10	9	50	7	50	4	4	9	8	44.4444	6	42.8571	4	4
SEVENTH	unclassified_Mycetocola	5	5	4	3	60	3	60	4	3	60	3	60	3	0.75	3	0.75	4	3	60	3	60	3	3	4	3	60	3	60	3	3
SIXTH	Naasia	5	5	0	0	0	0	0	0	0	0	0	0	0	NA	0	NA	0	0	0	0	0	0	0	0	0	0	0	0	0	0
SEVENTH	unclassified_Naasia	3	3	0	0	0	0	0	0	0	0	0	0	0	NA	0	NA	0	0	0	0	0	0	0	0	0	0	0	0	0	0
SIXTH	Okibacterium	2	2	0	0	0	0	0	0	0	0	0	0	0	NA	0	NA	0	0	0	0	0	0	0	0	0	0	0	0	0	0
SEVENTH	unclassified_Okibacterium	1	1	0	0	0	0	0	0	0	0	0	0	0	NA	0	NA	0	0	0	0	0	0	0	0	0	0	0	0	0	0
SIXTH	Parafrigoribacterium	3	3	1	1	33.3333	1	33.3333	1	1	33.3333	1	33.3333	1	1	1	1	1	1	33.3333	1	33.3333	1	1	1	1	33.3333	1	33.3333	1	1
SEVENTH	unclassified_Parafrigoribacterium	2	2	1	1	50	1	50	1	1	50	1	50	1	1	1	1	1	1	50	1	50	1	1	1	1	50	1	50	1	1
SIXTH	Paramicrobacterium	7	4	0	0	0	0	0	0	0	0	0	0	0	NA	0	NA	0	0	0	0	0	0	0	0	0	0	0	0	0	0
SIXTH	Planctomonas	3	3	3	3	100	3	100	3	3	100	3	100	3	1	3	1	3	3	100	3	100	3	3	3	3	100	3	100	3	3
SEVENTH	unclassified_Planctomonas	1	1	1	1	100	1	100	1	1	100	1	100	1	1	1	1	1	1	100	1	100	1	1	1	1	100	1	100	1	1
SIXTH	Plantibacter	31	25	28	26	83.871	21	84	28	26	83.871	21	84	5	0.178571	7	0.25	28	26	83.871	21	84	5	7	19	18	58.0645	14	56	3	4
SEVENTH	environmental_samples	1	1	0	0	0	0	0	0	0	0	0	0	0	NA	0	NA	0	0	0	0	0	0	0	0	0	0	0	0	0	0
SEVENTH	unclassified_Plantibacter	22	22	20	19	86.3636	19	86.3636	20	19	86.3636	19	86.3636	5	0.25	7	0.35	20	19	86.3636	19	86.3636	5	7	12	12	54.5455	12	54.5455	3	4
SIXTH	Pontimonas	3	2	0	0	0	0	0	0	0	0	0	0	0	NA	0	NA	0	0	0	0	0	0	0	0	0	0	0	0	0	0
SEVENTH	unclassified_Pontimonas	2	1	0	0	0	0	0	0	0	0	0	0	0	NA	0	NA	0	0	0	0	0	0	0	0	0	0	0	0	0	0
SIXTH	Protaetiibacter	4	4	0	0	0	0	0	0	0	0	0	0	0	NA	0	NA	0	0	0	0	0	0	0	0	0	0	0	0	0	0
SEVENTH	unclassified_Protaetiibacter	1	1	0	0	0	0	0	0	0	0	0	0	0	NA	0	NA	0	0	0	0	0	0	0	0	0	0	0	0	0	0
SIXTH	Pseudoclavibacter	40	30	0	0	0	0	0	0	0	0	0	0	0	NA	0	NA	0	0	0	0	0	0	0	0	0	0	0	0	0	0
SEVENTH	unclassified_Pseudoclavibacter	23	23	0	0	0	0	0	0	0	0	0	0	0	NA	0	NA	0	0	0	0	0	0	0	0	0	0	0	0	0	0
SIXTH	Pseudolysinimonas	5	3	0	0	0	0	0	0	0	0	0	0	0	NA	0	NA	0	0	0	0	0	0	0	0	0	0	0	0	0	0
SEVENTH	unclassified_Pseudolysinimonas	2	1	0	0	0	0	0	0	0	0	0	0	0	NA	0	NA	0	0	0	0	0	0	0	0	0	0	0	0	0	0
SIXTH	Rathayibacter	181	99	90	90	49.7238	86	86.8687	89	89	49.1713	85	85.8586	8	0.0898876	12	0.134831	87	87	48.0663	83	83.8384	7	11	85	85	46.9613	81	81.8182	5	9
SEVENTH	unclassified_Rathayibacter	89	89	82	82	92.1348	82	92.1348	81	81	91.0112	81	91.0112	6	0.0740741	10	0.123457	79	79	88.764	79	88.764	5	9	78	78	87.6404	78	87.6404	4	8
SIXTH	Rhodoglobus	2	2	0	0	0	0	0	0	0	0	0	0	0	NA	0	NA	0	0	0	0	0	0	0	0	0	0	0	0	0	0
SIXTH	Ruicaihuangia	2	1	0	0	0	0	0	0	0	0	0	0	0	NA	0	NA	0	0	0	0	0	0	0	0	0	0	0	0	0	0
SIXTH	Salinibacterium	38	31	0	0	0	0	0	0	0	0	0	0	0	NA	0	NA	0	0	0	0	0	0	0	0	0	0	0	0	0	0
SEVENTH	environmental_samples	1	1	0	0	0	0	0	0	0	0	0	0	0	NA	0	NA	0	0	0	0	0	0	0	0	0	0	0	0	0	0
SEVENTH	unclassified_Salinibacterium	26	24	0	0	0	0	0	0	0	0	0	0	0	NA	0	NA	0	0	0	0	0	0	0	0	0	0	0	0	0	0
SIXTH	Schumannella	4	4	3	3	75	3	75	3	3	75	3	75	2	0.666667	2	0.666667	3	3	75	3	75	2	2	3	3	75	3	75	2	2
SEVENTH	environmental_samples	1	1	0	0	0	0	0	0	0	0	0	0	0	NA	0	NA	0	0	0	0	0	0	0	0	0	0	0	0	0	0
SEVENTH	unclassified_Schumannella	1	1	1	1	100	1	100	1	1	100	1	100	1	1	1	1	1	1	100	1	100	1	1	1	1	100	1	100	1	1
SIXTH	Subtercola	17	9	5	4	23.5294	1	11.1111	5	4	23.5294	1	11.1111	4	0.8	4	0.8	5	4	23.5294	1	11.1111	4	4	3	2	11.7647	1	11.1111	3	3
SEVENTH	unclassified_Subtercola	4	4	0	0	0	0	0	0	0	0	0	0	0	NA	0	NA	0	0	0	0	0	0	0	0	0	0	0	0	0	0
SIXTH	Terrimesophilobacter	4	2	0	0	0	0	0	0	0	0	0	0	0	NA	0	NA	0	0	0	0	0	0	0	0	0	0	0	0	0	0
SEVENTH	unclassified_Terrimesophilobacter	1	1	0	0	0	0	0	0	0	0	0	0	0	NA	0	NA	0	0	0	0	0	0	0	0	0	0	0	0	0	0
FIFTH	Micrococcaceae	1809	842	66	66	3.64842	54	6.4133	64	64	3.53787	52	6.17577	30	0.46875	31	0.484375	64	64	3.53787	52	6.17577	30	31	58	58	3.20619	48	5.70071	27	28
SIXTH	Acaricomes	2	1	2	2	100	1	100	2	2	100	1	100	1	0.5	1	0.5	2	2	100	1	100	1	1	2	2	100	1	100	1	1
SIXTH	Arthrobacter	487	377	22	22	4.51745	19	5.03979	22	22	4.51745	19	5.03979	13	0.590909	14	0.636364	22	22	4.51745	19	5.03979	13	14	21	21	4.31211	18	4.77454	12	13
SEVENTH	environmental_samples	6	1	0	0	0	0	0	0	0	0	0	0	0	NA	0	NA	0	0	0	0	0	0	0	0	0	0	0	0	0	0
SEVENTH	unclassified_Arthrobacter	320	299	13	13	4.0625	13	4.34783	13	13	4.0625	13	4.34783	10	0.769231	11	0.846154	13	13	4.0625	13	4.34783	10	11	13	13	4.0625	13	4.34783	10	11
SIXTH	Auritidibacter	15	4	0	0	0	0	0	0	0	0	0	0	0	NA	0	NA	0	0	0	0	0	0	0	0	0	0	0	0	0	0
SEVENTH	unclassified_Auritidibacter	3	3	0	0	0	0	0	0	0	0	0	0	0	NA	0	NA	0	0	0	0	0	0	0	0	0	0	0	0	0	0
SIXTH	Citricoccus	19	13	4	4	21.0526	3	23.0769	4	4	21.0526	3	23.0769	1	0.25	1	0.25	4	4	21.0526	3	23.0769	1	1	4	4	21.0526	3	23.0769	1	1
SEVENTH	environmental_samples	1	1	0	0	0	0	0	0	0	0	0	0	0	NA	0	NA	0	0	0	0	0	0	0	0	0	0	0	0	0	0
SEVENTH	unclassified_Citricoccus	11	8	0	0	0	0	0	0	0	0	0	0	0	NA	0	NA	0	0	0	0	0	0	0	0	0	0	0	0	0	0
SIXTH	Enteractinococcus	6	3	0	0	0	0	0	0	0	0	0	0	0	NA	0	NA	0	0	0	0	0	0	0	0	0	0	0	0	0	0
SIXTH	Falsarthrobacter	2	1	0	0	0	0	0	0	0	0	0	0	0	NA	0	NA	0	0	0	0	0	0	0	0	0	0	0	0	0	0
SIXTH	Galactobacter	3	3	0	0	0	0	0	0	0	0	0	0	0	NA	0	NA	0	0	0	0	0	0	0	0	0	0	0	0	0	0
SEVENTH	unclassified_Galactobacter	1	1	0	0	0	0	0	0	0	0	0	0	0	NA	0	NA	0	0	0	0	0	0	0	0	0	0	0	0	0	0
SIXTH	Garicola	2	1	0	0	0	0	0	0	0	0	0	0	0	NA	0	NA	0	0	0	0	0	0	0	0	0	0	0	0	0	0
SIXTH	Glutamicibacter	65	26	2	2	3.07692	2	7.69231	2	2	3.07692	2	7.69231	2	1	2	1	2	2	3.07692	2	7.69231	2	2	2	2	3.07692	2	7.69231	2	2
SEVENTH	unclassified_Glutamicibacter	28	15	0	0	0	0	0	0	0	0	0	0	0	NA	0	NA	0	0	0	0	0	0	0	0	0	0	0	0	0	0
SIXTH	Haematomicrobium	1	1	0	0	0	0	0	0	0	0	0	0	0	NA	0	NA	0	0	0	0	0	0	0	0	0	0	0	0	0	0
SIXTH	Kocuria	223	71	8	8	3.58744	7	9.85915	8	8	3.58744	7	9.85915	5	0.625	4	0.5	8	8	3.58744	7	9.85915	5	4	8	8	3.58744	7	9.85915	5	4
SEVENTH	environmental_samples	3	1	1	1	33.3333	1	100	1	1	33.3333	1	100	1	1	1	1	1	1	33.3333	1	100	1	1	1	1	33.3333	1	100	1	1
SEVENTH	unclassified_Kocuria	56	46	4	4	7.14286	4	8.69565	4	4	7.14286	4	8.69565	3	0.75	2	0.5	4	4	7.14286	4	8.69565	3	2	4	4	7.14286	4	8.69565	3	2
SIXTH	Micrococcus	262	56	1	1	0.381679	1	1.78571	1	1	0.381679	1	1.78571	1	1	1	1	1	1	0.381679	1	1.78571	1	1	1	1	0.381679	1	1.78571	1	1
SEVENTH	environmental_samples	4	1	0	0	0	0	0	0	0	0	0	0	0	NA	0	NA	0	0	0	0	0	0	0	0	0	0	0	0	0	0
SEVENTH	unclassified_Micrococcus	46	45	0	0	0	0	0	0	0	0	0	0	0	NA	0	NA	0	0	0	0	0	0	0	0	0	0	0	0	0	0
SIXTH	Neomicrococcus	5	2	0	0	0	0	0	0	0	0	0	0	0	NA	0	NA	0	0	0	0	0	0	0	0	0	0	0	0	0	0
SIXTH	Nesterenkonia	51	41	9	9	17.6471	8	19.5122	9	9	17.6471	8	19.5122	4	0.444444	5	0.555556	9	9	17.6471	8	19.5122	4	5	7	7	13.7255	6	14.6341	3	4
SEVENTH	unclassified_Nesterenkonia	14	14	3	3	21.4286	3	21.4286	3	3	21.4286	3	21.4286	3	1	3	1	3	3	21.4286	3	21.4286	3	3	2	2	14.2857	2	14.2857	2	2
SIXTH	Paenarthrobacter	99	46	1	1	1.0101	1	2.17391	1	1	1.0101	1	2.17391	1	1	1	1	1	1	1.0101	1	2.17391	1	1	1	1	1.0101	1	2.17391	1	1
SEVENTH	unclassified_Paenarthrobacter	39	39	0	0	0	0	0	0	0	0	0	0	0	NA	0	NA	0	0	0	0	0	0	0	0	0	0	0	0	0	0
SIXTH	Paeniglutamicibacter	17	10	1	1	5.88235	1	10	1	1	5.88235	1	10	1	1	1	1	1	1	5.88235	1	10	1	1	1	1	5.88235	1	10	1	1
SEVENTH	unclassified_Paeniglutamicibacter	2	2	0	0	0	0	0	0	0	0	0	0	0	NA	0	NA	0	0	0	0	0	0	0	0	0	0	0	0	0	0
SIXTH	Pseudarthrobacter	117	75	7	7	5.98291	5	6.66667	7	7	5.98291	5	6.66667	3	0.428571	3	0.428571	7	7	5.98291	5	6.66667	3	3	7	7	5.98291	5	6.66667	3	3
SEVENTH	unclassified_Pseudarthrobacter	59	59	2	2	3.38983	2	3.38983	2	2	3.38983	2	3.38983	2	1	2	1	2	2	3.38983	2	3.38983	2	2	2	2	3.38983	2	3.38983	2	2
SIXTH	Pseudoglutamicibacter	11	2	0	0	0	0	0	0	0	0	0	0	0	NA	0	NA	0	0	0	0	0	0	0	0	0	0	0	0	0	0
SIXTH	Psychromicrobium	3	3	1	1	33.3333	1	33.3333	0	0	0	0	0	0	NA	0	NA	0	0	0	0	0	0	0	0	0	0	0	0	0	0
SIXTH	Renibacterium	3	1	3	3	100	1	100	3	3	100	1	100	1	0.333333	1	0.333333	3	3	100	1	100	1	1	0	0	0	0	0	0	0
SIXTH	Rothia	366	69	4	4	1.0929	3	4.34783	4	4	1.0929	3	4.34783	3	0.75	3	0.75	4	4	1.0929	3	4.34783	3	3	4	4	1.0929	3	4.34783	3	3
SEVENTH	environmental_samples	52	1	1	1	1.92308	1	100	1	1	1.92308	1	100	1	1	1	1	1	1	1.92308	1	100	1	1	1	1	1.92308	1	100	1	1
SEVENTH	unclassified_Rothia_in_high_G_C_Gram_positive_bacteria	64	55	0	0	0	0	0	0	0	0	0	0	0	NA	0	NA	0	0	0	0	0	0	0	0	0	0	0	0	0	0
SIXTH	Sinomonas	25	18	0	0	0	0	0	0	0	0	0	0	0	NA	0	NA	0	0	0	0	0	0	0	0	0	0	0	0	0	0
SEVENTH	unclassified_Sinomonas	5	5	0	0	0	0	0	0	0	0	0	0	0	NA	0	NA	0	0	0	0	0	0	0	0	0	0	0	0	0	0
SIXTH	Specibacter	3	3	0	0	0	0	0	0	0	0	0	0	0	NA	0	NA	0	0	0	0	0	0	0	0	0	0	0	0	0	0
SEVENTH	unclassified_Specibacter	2	2	0	0	0	0	0	0	0	0	0	0	0	NA	0	NA	0	0	0	0	0	0	0	0	0	0	0	0	0	0
SIXTH	Tersicoccus	4	4	1	1	25	1	25	0	0	0	0	0	0	NA	0	NA	0	0	0	0	0	0	0	0	0	0	0	0	0	0
SEVENTH	unclassified_Tersicoccus	2	2	0	0	0	0	0	0	0	0	0	0	0	NA	0	NA	0	0	0	0	0	0	0	0	0	0	0	0	0	0
SIXTH	Yaniella	8	3	0	0	0	0	0	0	0	0	0	0	0	NA	0	NA	0	0	0	0	0	0	0	0	0	0	0	0	0	0
SEVENTH	unclassified_Yaniella	6	1	0	0	0	0	0	0	0	0	0	0	0	NA	0	NA	0	0	0	0	0	0	0	0	0	0	0	0	0	0
SIXTH	Zafaria	2	2	0	0	0	0	0	0	0	0	0	0	0	NA	0	NA	0	0	0	0	0	0	0	0	0	0	0	0	0	0
SEVENTH	unclassified_Zafaria	1	1	0	0	0	0	0	0	0	0	0	0	0	NA	0	NA	0	0	0	0	0	0	0	0	0	0	0	0	0	0
SIXTH	Zhihengliuella	8	6	0	0	0	0	0	0	0	0	0	0	0	NA	0	NA	0	0	0	0	0	0	0	0	0	0	0	0	0	0
SEVENTH	unclassified_Zhihengliuella	3	2	0	0	0	0	0	0	0	0	0	0	0	NA	0	NA	0	0	0	0	0	0	0	0	0	0	0	0	0	0
FIFTH	Micrococcales_incertae_sedis	11	7	1	1	9.09091	1	14.2857	1	1	9.09091	1	14.2857	1	1	1	1	1	1	9.09091	1	14.2857	1	1	1	1	9.09091	1	14.2857	1	1
SIXTH	Luteimicrobium	4	3	0	0	0	0	0	0	0	0	0	0	0	NA	0	NA	0	0	0	0	0	0	0	0	0	0	0	0	0	0
SIXTH	Pengzhenrongella	3	3	1	1	33.3333	1	33.3333	1	1	33.3333	1	33.3333	1	1	1	1	1	1	33.3333	1	33.3333	1	1	1	1	33.3333	1	33.3333	1	1
SEVENTH	unclassified_Pengzhenrongella	1	1	0	0	0	0	0	0	0	0	0	0	0	NA	0	NA	0	0	0	0	0	0	0	0	0	0	0	0	0	0
SIXTH	Timonella	4	1	0	0	0	0	0	0	0	0	0	0	0	NA	0	NA	0	0	0	0	0	0	0	0	0	0	0	0	0	0
FIFTH	Ornithinimicrobiaceae	49	29	0	0	0	0	0	0	0	0	0	0	0	NA	0	NA	0	0	0	0	0	0	0	0	0	0	0	0	0	0
SIXTH	Ornithinimicrobium	32	20	0	0	0	0	0	0	0	0	0	0	0	NA	0	NA	0	0	0	0	0	0	0	0	0	0	0	0	0	0
SEVENTH	environmental_samples	1	1	0	0	0	0	0	0	0	0	0	0	0	NA	0	NA	0	0	0	0	0	0	0	0	0	0	0	0	0	0
SEVENTH	unclassified_Ornithinimicrobium	5	4	0	0	0	0	0	0	0	0	0	0	0	NA	0	NA	0	0	0	0	0	0	0	0	0	0	0	0	0	0
SIXTH	Serinicoccus	17	9	0	0	0	0	0	0	0	0	0	0	0	NA	0	NA	0	0	0	0	0	0	0	0	0	0	0	0	0	0
SEVENTH	environmental_samples	4	1	0	0	0	0	0	0	0	0	0	0	0	NA	0	NA	0	0	0	0	0	0	0	0	0	0	0	0	0	0
SEVENTH	unclassified_Serinicoccus	2	2	0	0	0	0	0	0	0	0	0	0	0	NA	0	NA	0	0	0	0	0	0	0	0	0	0	0	0	0	0
FIFTH	Promicromonosporaceae	116	70	24	24	20.6897	17	24.2857	24	24	20.6897	17	24.2857	14	0.583333	16	0.666667	24	24	20.6897	17	24.2857	14	16	24	24	20.6897	17	24.2857	14	16
SIXTH	Antribacter	2	2	0	0	0	0	0	0	0	0	0	0	0	NA	0	NA	0	0	0	0	0	0	0	0	0	0	0	0	0	0
SIXTH	Cellulosimicrobium	55	23	4	4	7.27273	3	13.0435	4	4	7.27273	3	13.0435	4	1	4	1	4	4	7.27273	3	13.0435	4	4	4	4	7.27273	3	13.0435	4	4
SEVENTH	environmental_samples	1	1	0	0	0	0	0	0	0	0	0	0	0	NA	0	NA	0	0	0	0	0	0	0	0	0	0	0	0	0	0
SEVENTH	unclassified_Cellulosimicrobium	18	15	1	1	5.55556	1	6.66667	1	1	5.55556	1	6.66667	1	1	1	1	1	1	5.55556	1	6.66667	1	1	1	1	5.55556	1	6.66667	1	1
SIXTH	Isoptericola	24	18	7	7	29.1667	5	27.7778	7	7	29.1667	5	27.7778	4	0.571429	4	0.571429	7	7	29.1667	5	27.7778	4	4	7	7	29.1667	5	27.7778	4	4
SEVENTH	unclassified_Isoptericola	7	7	1	1	14.2857	1	14.2857	1	1	14.2857	1	14.2857	1	1	1	1	1	1	14.2857	1	14.2857	1	1	1	1	14.2857	1	14.2857	1	1
SIXTH	Krasilnikoviella	1	1	0	0	0	0	0	0	0	0	0	0	0	NA	0	NA	0	0	0	0	0	0	0	0	0	0	0	0	0	0
SIXTH	Myceligenerans	6	5	1	1	16.6667	1	20	1	1	16.6667	1	20	1	1	1	1	1	1	16.6667	1	20	1	1	1	1	16.6667	1	20	1	1
SIXTH	Promicromonospora	21	15	11	11	52.381	7	46.6667	11	11	52.381	7	46.6667	4	0.363636	6	0.545455	11	11	52.381	7	46.6667	4	6	11	11	52.381	7	46.6667	4	6
SEVENTH	unclassified_Promicromonospora	7	7	2	2	28.5714	2	28.5714	2	2	28.5714	2	28.5714	2	1	2	1	2	2	28.5714	2	28.5714	2	2	2	2	28.5714	2	28.5714	2	2
SIXTH	Puerhibacterium	1	1	0	0	0	0	0	0	0	0	0	0	0	NA	0	NA	0	0	0	0	0	0	0	0	0	0	0	0	0	0
SIXTH	Xylanimonas	6	5	1	1	16.6667	1	20	1	1	16.6667	1	20	1	1	1	1	1	1	16.6667	1	20	1	1	1	1	16.6667	1	20	1	1
FIFTH	Rarobacteraceae	4	2	0	0	0	0	0	0	0	0	0	0	0	NA	0	NA	0	0	0	0	0	0	0	0	0	0	0	0	0	0
SIXTH	Rarobacter	4	2	0	0	0	0	0	0	0	0	0	0	0	NA	0	NA	0	0	0	0	0	0	0	0	0	0	0	0	0	0
FIFTH	Ruaniaceae	14	11	5	5	35.7143	4	36.3636	5	5	35.7143	4	36.3636	2	0.4	2	0.4	5	5	35.7143	4	36.3636	2	2	5	5	35.7143	4	36.3636	2	2
SIXTH	Occultella	5	4	4	4	80	3	75	4	4	80	3	75	1	0.25	1	0.25	4	4	80	3	75	1	1	4	4	80	3	75	1	1
SIXTH	Ruania	9	7	1	1	11.1111	1	14.2857	1	1	11.1111	1	14.2857	1	1	1	1	1	1	11.1111	1	14.2857	1	1	1	1	11.1111	1	14.2857	1	1
FIFTH	Sanguibacteraceae	15	13	2	2	13.3333	2	15.3846	2	2	13.3333	2	15.3846	1	0.5	1	0.5	2	2	13.3333	2	15.3846	1	1	2	2	13.3333	2	15.3846	1	1
SIXTH	Sanguibacter	15	13	2	2	13.3333	2	15.3846	2	2	13.3333	2	15.3846	1	0.5	1	0.5	2	2	13.3333	2	15.3846	1	1	2	2	13.3333	2	15.3846	1	1
SEVENTH	unclassified_Sanguibacter	5	5	2	2	40	2	40	2	2	40	2	40	1	0.5	1	0.5	2	2	40	2	40	1	1	2	2	40	2	40	1	1
FIFTH	Tropherymataceae	19	1	0	0	0	0	0	0	0	0	0	0	0	NA	0	NA	0	0	0	0	0	0	0	0	0	0	0	0	0	0
SIXTH	Tropheryma	19	1	0	0	0	0	0	0	0	0	0	0	0	NA	0	NA	0	0	0	0	0	0	0	0	0	0	0	0	0	0
FORTH	Micromonosporales	947	631	639	583	61.5628	371	58.7956	627	574	60.6125	364	57.6862	102	0.162679	129	0.205742	624	571	60.2957	361	57.2108	100	127	597	549	57.9725	345	54.6751	90	116
FIFTH	Micromonosporaceae	947	631	639	583	61.5628	371	58.7956	627	574	60.6125	364	57.6862	102	0.162679	129	0.205742	624	571	60.2957	361	57.2108	100	127	597	549	57.9725	345	54.6751	90	116
SIXTH	Actinocatenispora	8	4	3	3	37.5	2	50	3	3	37.5	2	50	1	0.333333	1	0.333333	3	3	37.5	2	50	1	1	3	3	37.5	2	50	1	1
SIXTH	Actinoplanes	92	64	42	40	43.4783	30	46.875	42	40	43.4783	30	46.875	22	0.52381	25	0.595238	41	39	42.3913	29	45.3125	21	24	38	36	39.1304	26	40.625	20	22
SEVENTH	unclassified_Actinoplanes	37	36	20	19	51.3514	19	52.7778	20	19	51.3514	19	52.7778	16	0.8	17	0.85	19	18	48.6486	18	50	15	16	16	15	40.5405	15	41.6667	14	14
SIXTH	Actinorhabdospora	1	1	1	1	100	1	100	1	1	100	1	100	1	1	1	1	1	1	100	1	100	1	1	1	1	100	1	100	1	1
SIXTH	Allocatelliglobosispora	1	1	0	0	0	0	0	0	0	0	0	0	0	NA	0	NA	0	0	0	0	0	0	0	0	0	0	0	0	0	0
SIXTH	Allorhizocola	1	1	0	0	0	0	0	0	0	0	0	0	0	NA	0	NA	0	0	0	0	0	0	0	0	0	0	0	0	0	0
SIXTH	Amorphoplanes	7	4	5	3	42.8571	2	50	5	3	42.8571	2	50	3	0.6	3	0.6	5	3	42.8571	2	50	3	3	5	3	42.8571	2	50	3	3
SIXTH	Asanoa	13	10	2	2	15.3846	2	20	2	2	15.3846	2	20	2	1	2	1	2	2	15.3846	2	20	2	2	2	2	15.3846	2	20	2	2
SEVENTH	unclassified_Asanoa	5	5	1	1	20	1	20	1	1	20	1	20	1	1	1	1	1	1	20	1	20	1	1	1	1	20	1	20	1	1
SIXTH	Catellatospora	24	15	12	12	50	8	53.3333	11	11	45.8333	7	46.6667	2	0.181818	3	0.272727	11	11	45.8333	7	46.6667	2	3	11	11	45.8333	7	46.6667	2	3
SEVENTH	unclassified_Catellatospora	6	6	1	1	16.6667	1	16.6667	1	1	16.6667	1	16.6667	1	1	1	1	1	1	16.6667	1	16.6667	1	1	1	1	16.6667	1	16.6667	1	1
SIXTH	Catelliglobosispora	1	1	0	0	0	0	0	0	0	0	0	0	0	NA	0	NA	0	0	0	0	0	0	0	0	0	0	0	0	0	0
SIXTH	Catenuloplanes	5	5	5	5	100	5	100	5	5	100	5	100	1	0.2	1	0.2	5	5	100	5	100	1	1	4	4	80	4	80	1	1
SIXTH	Couchioplanes	4	1	1	1	25	1	100	1	1	25	1	100	1	1	1	1	1	1	25	1	100	1	1	1	1	25	1	100	1	1
SIXTH	Dactylosporangium	31	24	0	0	0	0	0	0	0	0	0	0	0	NA	0	NA	0	0	0	0	0	0	0	0	0	0	0	0	0	0
SEVENTH	unclassified_Dactylosporangium	14	14	0	0	0	0	0	0	0	0	0	0	0	NA	0	NA	0	0	0	0	0	0	0	0	0	0	0	0	0	0
SIXTH	Hamadaea	5	5	1	1	20	1	20	1	1	20	1	20	1	1	1	1	1	1	20	1	20	1	1	1	1	20	1	20	1	1
SEVENTH	unclassified_Hamadaea	3	3	1	1	33.3333	1	33.3333	1	1	33.3333	1	33.3333	1	1	1	1	1	1	33.3333	1	33.3333	1	1	1	1	33.3333	1	33.3333	1	1
SIXTH	Jidongwangia	1	1	1	1	100	1	100	1	1	100	1	100	1	1	1	1	1	1	100	1	100	1	1	1	1	100	1	100	1	1
SIXTH	Krasilnikovia	1	1	0	0	0	0	0	0	0	0	0	0	0	NA	0	NA	0	0	0	0	0	0	0	0	0	0	0	0	0	0
SIXTH	Longispora	4	3	3	3	75	2	66.6667	3	3	75	2	66.6667	1	0.333333	2	0.666667	3	3	75	2	66.6667	1	2	3	3	75	2	66.6667	1	2
SEVENTH	unclassified_Longispora_in_high_G_C_Gram_positive_bacteria	1	1	1	1	100	1	100	1	1	100	1	100	1	1	1	1	1	1	100	1	100	1	1	1	1	100	1	100	1	1
SIXTH	Luedemannella	2	2	0	0	0	0	0	0	0	0	0	0	0	NA	0	NA	0	0	0	0	0	0	0	0	0	0	0	0	0	0
SIXTH	Mangrovihabitans	1	1	1	1	100	1	100	1	1	100	1	100	1	1	1	1	1	1	100	1	100	1	1	1	1	100	1	100	1	1
SIXTH	Micromonospora	624	406	471	426	68.2692	263	64.7783	461	419	67.1474	257	63.3005	45	0.0976139	63	0.136659	459	417	66.8269	255	62.8079	44	62	441	401	64.2628	245	60.3448	36	53
SEVENTH	unclassified_Micromonospora	293	292	204	188	64.1638	187	64.0411	199	183	62.4573	182	62.3288	32	0.160804	42	0.211055	197	181	61.7747	180	61.6438	31	41	188	173	59.0444	172	58.9041	27	35
SIXTH	Natronosporangium	1	1	1	1	100	1	100	1	1	100	1	100	1	1	1	1	1	1	100	1	100	1	1	1	1	100	1	100	1	1
SIXTH	Nucisporomicrobium	1	1	1	1	100	1	100	1	1	100	1	100	1	1	1	1	1	1	100	1	100	1	1	1	1	100	1	100	1	1
SIXTH	Paractinoplanes	24	18	13	13	54.1667	10	55.5556	13	13	54.1667	10	55.5556	8	0.615385	9	0.692308	13	13	54.1667	10	55.5556	8	9	13	13	54.1667	10	55.5556	8	9
SIXTH	Phytohabitans	9	6	3	2	22.2222	1	16.6667	2	1	11.1111	1	16.6667	2	1	2	1	2	1	11.1111	1	16.6667	2	2	2	1	11.1111	1	16.6667	2	2
SIXTH	Phytomonospora	3	2	4	3	100	2	100	4	3	100	2	100	3	0.75	3	0.75	4	3	100	2	100	3	3	3	3	100	2	100	2	2
SEVENTH	unclassified_Phytomonospora	1	1	2	1	100	1	100	2	1	100	1	100	2	1	2	1	2	1	100	1	100	2	2	1	1	100	1	100	1	1
SIXTH	Pilimelia	3	3	1	1	33.3333	1	33.3333	1	1	33.3333	1	33.3333	1	1	1	1	1	1	33.3333	1	33.3333	1	1	1	1	33.3333	1	33.3333	1	1
SIXTH	Planosporangium	6	3	0	0	0	0	0	0	0	0	0	0	0	NA	0	NA	0	0	0	0	0	0	0	0	0	0	0	0	0	0
SIXTH	Plantactinospora	15	14	15	11	73.3333	10	71.4286	15	11	73.3333	10	71.4286	7	0.466667	8	0.533333	15	11	73.3333	10	71.4286	7	8	11	9	60	8	57.1429	5	6
SEVENTH	unclassified_Plantactinospora	8	8	5	4	50	4	50	5	4	50	4	50	3	0.6	3	0.6	5	4	50	4	50	3	3	3	3	37.5	3	37.5	2	2
SIXTH	Polymorphospora	7	4	7	7	100	4	100	7	7	100	4	100	1	0.142857	1	0.142857	7	7	100	4	100	1	1	7	7	100	4	100	1	1
SEVENTH	unclassified_Polymorphospora	2	2	2	2	100	2	100	2	2	100	2	100	1	0.5	1	0.5	2	2	100	2	100	1	1	2	2	100	2	100	1	1
SIXTH	Pseudosporangium	1	1	1	1	100	1	100	1	1	100	1	100	1	1	1	1	1	1	100	1	100	1	1	1	1	100	1	100	1	1
SIXTH	Rhizocola	1	1	0	0	0	0	0	0	0	0	0	0	0	NA	0	NA	0	0	0	0	0	0	0	0	0	0	0	0	0	0
SIXTH	Rugosimonospora	2	2	2	2	100	2	100	2	2	100	2	100	2	1	2	1	2	2	100	2	100	2	2	2	2	100	2	100	2	2
SIXTH	Salinispora	28	9	27	27	96.4286	8	88.8889	27	27	96.4286	8	88.8889	2	0.0740741	1	0.037037	27	27	96.4286	8	88.8889	2	1	27	27	96.4286	8	88.8889	2	1
SEVENTH	unclassified_Salinispora	1	1	0	0	0	0	0	0	0	0	0	0	0	NA	0	NA	0	0	0	0	0	0	0	0	0	0	0	0	0	0
SIXTH	Solwaraspora	9	9	4	4	44.4444	4	44.4444	4	4	44.4444	4	44.4444	1	0.25	1	0.25	4	4	44.4444	4	44.4444	1	1	4	4	44.4444	4	44.4444	1	1
SEVENTH	unclassified_Solwaraspora	9	9	4	4	44.4444	4	44.4444	4	4	44.4444	4	44.4444	1	0.25	1	0.25	4	4	44.4444	4	44.4444	1	1	4	4	44.4444	4	44.4444	1	1
SIXTH	Spirilliplanes	3	1	3	3	100	1	100	3	3	100	1	100	1	0.333333	1	0.333333	3	3	100	1	100	1	1	3	3	100	1	100	1	1
SIXTH	Symbioplanes	1	1	1	1	100	1	100	1	1	100	1	100	1	1	1	1	1	1	100	1	100	1	1	1	1	100	1	100	1	1
SIXTH	Virgisporangium	3	3	4	3	100	3	100	4	3	100	3	100	3	0.75	4	1	4	3	100	3	100	3	4	4	3	100	3	100	3	4
SIXTH	Winogradskya	4	2	4	4	100	2	100	4	4	100	2	100	1	0.25	1	0.25	4	4	100	2	100	1	1	4	4	100	2	100	1	1
FORTH	Motilibacterales	5	5	1	1	20	1	20	1	1	20	1	20	1	1	1	1	1	1	20	1	20	1	1	1	1	20	1	20	1	1
FIFTH	Motilibacteraceae	4	4	1	1	25	1	25	1	1	25	1	25	1	1	1	1	1	1	25	1	25	1	1	1	1	25	1	25	1	1
SIXTH	Motilibacter	4	4	1	1	25	1	25	1	1	25	1	25	1	1	1	1	1	1	25	1	25	1	1	1	1	25	1	25	1	1
FIFTH	Vallicoccaceae	1	1	0	0	0	0	0	0	0	0	0	0	0	NA	0	NA	0	0	0	0	0	0	0	0	0	0	0	0	0	0
SIXTH	Vallicoccus	1	1	0	0	0	0	0	0	0	0	0	0	0	NA	0	NA	0	0	0	0	0	0	0	0	0	0	0	0	0	0
FORTH	Mycobacteriales	15313	1875	11687	11362	74.1984	826	44.0533	11610	11297	73.7739	814	43.4133	324	0.027907	341	0.0293712	11588	11288	73.7151	810	43.2	312	327	11477	11195	73.1078	759	40.48	289	304
FIFTH	Corynebacteriaceae	2338	530	14	14	0.598802	4	0.754717	14	14	0.598802	4	0.754717	3	0.214286	3	0.214286	14	14	0.598802	4	0.754717	3	3	13	13	0.556031	3	0.566038	2	2
SIXTH	Corynebacterium	2338	530	14	14	0.598802	4	0.754717	14	14	0.598802	4	0.754717	3	0.214286	3	0.214286	14	14	0.598802	4	0.754717	3	3	13	13	0.556031	3	0.566038	2	2
SEVENTH	environmental_samples	70	1	0	0	0	0	0	0	0	0	0	0	0	NA	0	NA	0	0	0	0	0	0	0	0	0	0	0	0	0	0
SEVENTH	unclassified_Corynebacterium	395	351	0	0	0	0	0	0	0	0	0	0	0	NA	0	NA	0	0	0	0	0	0	0	0	0	0	0	0	0	0
FIFTH	Corynebacteriales_incertae_sedis	13	6	4	4	30.7692	2	33.3333	4	4	30.7692	2	33.3333	2	0.5	2	0.5	4	4	30.7692	2	33.3333	2	2	4	4	30.7692	2	33.3333	2	2
SIXTH	Fodinicola	3	2	1	1	33.3333	1	50	1	1	33.3333	1	50	1	1	1	1	1	1	33.3333	1	50	1	1	1	1	33.3333	1	50	1	1
SIXTH	Tomitella	10	4	3	3	30	1	25	3	3	30	1	25	1	0.333333	1	0.333333	3	3	30	1	25	1	1	3	3	30	1	25	1	1
FIFTH	Dietziaceae	106	46	4	4	3.77358	3	6.52174	3	3	2.83019	2	4.34783	2	0.666667	2	0.666667	3	3	2.83019	2	4.34783	2	2	2	2	1.88679	1	2.17391	1	1
SIXTH	Dietzia	106	46	4	4	3.77358	3	6.52174	3	3	2.83019	2	4.34783	2	0.666667	2	0.666667	3	3	2.83019	2	4.34783	2	2	2	2	1.88679	1	2.17391	1	1
SEVENTH	environmental_samples	3	1	0	0	0	0	0	0	0	0	0	0	0	NA	0	NA	0	0	0	0	0	0	0	0	0	0	0	0	0	0
SEVENTH	unclassified_Dietzia	33	32	2	2	6.06061	2	6.25	1	1	3.0303	1	3.125	1	1	1	1	1	1	3.0303	1	3.125	1	1	0	0	0	0	0	0	0
FIFTH	Gordoniaceae	255	120	13	13	5.09804	12	10	13	13	5.09804	12	10	7	0.538462	7	0.538462	13	13	5.09804	12	10	7	7	13	13	5.09804	12	10	7	7
SIXTH	Gordonia	250	116	13	13	5.2	12	10.3448	13	13	5.2	12	10.3448	7	0.538462	7	0.538462	13	13	5.2	12	10.3448	7	7	13	13	5.2	12	10.3448	7	7
SEVENTH	environmental_samples	5	1	1	1	20	1	100	1	1	20	1	100	1	1	1	1	1	1	20	1	100	1	1	1	1	20	1	100	1	1
SEVENTH	unclassified_Gordonia_in_high_G_C_Gram_positive_bacteria	73	62	5	5	6.84932	5	8.06452	5	5	6.84932	5	8.06452	2	0.4	2	0.4	5	5	6.84932	5	8.06452	2	2	5	5	6.84932	5	8.06452	2	2
SIXTH	Jongsikchunia	1	1	0	0	0	0	0	0	0	0	0	0	0	NA	0	NA	0	0	0	0	0	0	0	0	0	0	0	0	0	0
SIXTH	Millisia	1	1	0	0	0	0	0	0	0	0	0	0	0	NA	0	NA	0	0	0	0	0	0	0	0	0	0	0	0	0	0
SIXTH	Skermania	3	2	0	0	0	0	0	0	0	0	0	0	0	NA	0	NA	0	0	0	0	0	0	0	0	0	0	0	0	0	0
SEVENTH	unclassified_Skermania	1	1	0	0	0	0	0	0	0	0	0	0	0	NA	0	NA	0	0	0	0	0	0	0	0	0	0	0	0	0	0
FIFTH	Hoyosellaceae	9	7	0	0	0	0	0	0	0	0	0	0	0	NA	0	NA	0	0	0	0	0	0	0	0	0	0	0	0	0	0
SIXTH	Hoyosella	6	4	0	0	0	0	0	0	0	0	0	0	0	NA	0	NA	0	0	0	0	0	0	0	0	0	0	0	0	0	0
SEVENTH	unclassified_Hoyosella	1	1	0	0	0	0	0	0	0	0	0	0	0	NA	0	NA	0	0	0	0	0	0	0	0	0	0	0	0	0	0
SIXTH	Lolliginicoccus	3	3	0	0	0	0	0	0	0	0	0	0	0	NA	0	NA	0	0	0	0	0	0	0	0	0	0	0	0	0	0
FIFTH	Lawsonellaceae	15	3	0	0	0	0	0	0	0	0	0	0	0	NA	0	NA	0	0	0	0	0	0	0	0	0	0	0	0	0	0
SIXTH	Lawsonella	15	3	0	0	0	0	0	0	0	0	0	0	0	NA	0	NA	0	0	0	0	0	0	0	0	0	0	0	0	0	0
SEVENTH	environmental_samples	2	1	0	0	0	0	0	0	0	0	0	0	0	NA	0	NA	0	0	0	0	0	0	0	0	0	0	0	0	0	0
SEVENTH	unclassified_Lawsonella	2	1	0	0	0	0	0	0	0	0	0	0	0	NA	0	NA	0	0	0	0	0	0	0	0	0	0	0	0	0	0
FIFTH	Mycobacteriaceae	11052	516	10384	10306	93.2501	360	69.7674	10341	10273	92.9515	353	68.4109	148	0.014312	152	0.0146988	10333	10268	92.9063	351	68.0233	141	145	10300	10244	92.6891	344	66.6667	135	139
SIXTH	Mycobacterium	8317	311	7663	7641	91.8721	181	58.1994	7631	7615	91.5595	176	56.5916	89	0.011663	94	0.0123182	7628	7613	91.5354	174	55.9486	86	91	7607	7596	91.331	171	54.9839	85	90
SEVENTH	environmental_samples	1	1	0	0	0	0	0	0	0	0	0	0	0	NA	0	NA	0	0	0	0	0	0	0	0	0	0	0	0	0	0
SEVENTH	Mycobacterium_avium_complex_MAC	440	12	1	1	0.227273	1	8.33333	0	0	0	0	0	0	NA	0	NA	0	0	0	0	0	0	0	0	0	0	0	0	0	0
EIGHTH	unclassified_Mycobacterium_avium_complex_MAC	2	2	0	0	0	0	0	0	0	0	0	0	0	NA	0	NA	0	0	0	0	0	0	0	0	0	0	0	0	0	0
SEVENTH	Mycobacterium_simiae_complex	67	20	46	41	61.194	10	50	45	41	61.194	10	50	6	0.133333	6	0.133333	45	41	61.194	10	50	6	6	27	27	40.2985	8	40	4	4
SEVENTH	Mycobacterium_tuberculosis_complex	7229	11	7235	7224	99.9308	10	90.9091	7224	7217	99.834	10	90.9091	2	0.000276855	2	0.000276855	7224	7217	99.834	10	90.9091	2	2	7224	7217	99.834	10	90.9091	2	2
EIGHTH	unclassified_Mycobacterium_tuberculosis_complex	7	7	6	6	85.7143	6	85.7143	6	6	85.7143	6	85.7143	1	0.166667	1	0.166667	6	6	85.7143	6	85.7143	1	1	6	6	85.7143	6	85.7143	1	1
SEVENTH	unclassified_Mycobacterium	229	191	127	125	54.5852	114	59.6859	125	123	53.7118	112	58.6387	63	0.504	69	0.552	123	121	52.8384	110	57.5916	61	67	123	121	52.8384	110	57.5916	61	67
SIXTH	Mycobacteroides	2132	23	2145	2131	99.9531	23	100	2143	2130	99.9062	23	100	7	0.00326645	7	0.00326645	2142	2129	99.8593	23	100	6	6	2138	2129	99.8593	23	100	5	5
SEVENTH	unclassified_Mycobacteroides	16	16	16	16	100	16	100	16	16	100	16	100	2	0.125	2	0.125	16	16	100	16	100	2	2	16	16	100	16	100	2	2
SIXTH	Mycolicibacillus	7	3	2	2	28.5714	1	33.3333	2	2	28.5714	1	33.3333	1	0.5	1	0.5	2	2	28.5714	1	33.3333	1	1	0	0	0	0	0	0	0
SIXTH	Mycolicibacter	51	21	3	3	5.88235	3	14.2857	2	2	3.92157	2	9.52381	1	0.5	1	0.5	2	2	3.92157	2	9.52381	1	1	2	2	3.92157	2	9.52381	1	1
SEVENTH	unclassified_Mycolicibacter	2	2	0	0	0	0	0	0	0	0	0	0	0	NA	0	NA	0	0	0	0	0	0	0	0	0	0	0	0	0	0
SIXTH	Mycolicibacterium	545	158	571	529	97.0642	152	96.2025	563	524	96.1468	151	95.5696	82	0.145648	83	0.147425	559	522	95.7798	151	95.5696	79	80	553	517	94.8624	148	93.6709	76	77
SEVENTH	environmental_samples	3	1	3	3	100	1	100	3	3	100	1	100	3	1	3	1	3	3	100	1	100	3	3	3	3	100	1	100	3	3
SEVENTH	unclassified_Mycolicibacterium	63	57	63	60	95.2381	56	98.2456	62	59	93.6508	55	96.4912	29	0.467742	31	0.5	61	58	92.0635	55	96.4912	28	30	56	54	85.7143	52	91.2281	26	28
FIFTH	Nocardiaceae	1476	624	1264	1017	68.9024	441	70.6731	1231	986	66.8022	437	70.0321	162	0.1316	175	0.142161	1217	982	66.5312	435	69.7115	157	168	1141	915	61.9919	393	62.9808	142	153
SIXTH	Aldersonia	2	2	0	0	0	0	0	0	0	0	0	0	0	NA	0	NA	0	0	0	0	0	0	0	0	0	0	0	0	0	0
SEVENTH	unclassified_Aldersonia	1	1	0	0	0	0	0	0	0	0	0	0	0	NA	0	NA	0	0	0	0	0	0	0	0	0	0	0	0	0	0
SIXTH	Antrihabitans	4	4	4	4	100	4	100	4	4	100	4	100	4	1	4	1	4	4	100	4	100	4	4	4	4	100	4	100	4	4
SEVENTH	unclassified_Antrihabitans	1	1	1	1	100	1	100	1	1	100	1	100	1	1	1	1	1	1	100	1	100	1	1	1	1	100	1	100	1	1
SIXTH	Nocardia	631	220	847	614	97.3059	211	95.9091	819	588	93.1854	210	95.4545	121	0.147741	133	0.162393	808	587	93.0269	209	95	117	127	779	566	89.6989	202	91.8182	108	118
SEVENTH	unclassified_Nocardia	109	106	146	103	94.4954	100	94.3396	146	103	94.4954	100	94.3396	63	0.431507	66	0.452055	143	103	94.4954	100	94.3396	62	64	136	99	90.8257	96	90.566	60	62
SIXTH	Prescottella	86	7	5	5	5.81395	1	14.2857	5	5	5.81395	1	14.2857	1	0.2	1	0.2	5	5	5.81395	1	14.2857	1	1	5	5	5.81395	1	14.2857	1	1
SEVENTH	unclassified_Prescottella	2	2	0	0	0	0	0	0	0	0	0	0	0	NA	0	NA	0	0	0	0	0	0	0	0	0	0	0	0	0	0
SIXTH	Rhodococcoides	66	6	46	46	69.697	4	66.6667	46	46	69.697	4	66.6667	5	0.108696	5	0.108696	46	46	69.697	4	66.6667	5	5	46	46	69.697	4	66.6667	5	5
SIXTH	Rhodococcus	659	367	349	335	50.8346	212	57.7657	344	330	50.0759	209	56.9482	31	0.0901163	32	0.0930233	341	327	49.6206	208	56.6757	30	31	294	281	42.6404	173	47.139	24	25
SEVENTH	environmental_samples	2	1	0	0	0	0	0	0	0	0	0	0	0	NA	0	NA	0	0	0	0	0	0	0	0	0	0	0	0	0	0
SEVENTH	unclassified_Rhodococcus_in_high_G_C_Gram_positive_bacteria	345	330	207	193	55.942	191	57.8788	205	191	55.3623	189	57.2727	27	0.131707	27	0.131707	204	190	55.0725	188	56.9697	26	26	169	156	45.2174	154	46.6667	22	22
SIXTH	Smaragdicoccus	2	1	0	0	0	0	0	0	0	0	0	0	0	NA	0	NA	0	0	0	0	0	0	0	0	0	0	0	0	0	0
SIXTH	Williamsia	26	17	13	13	50	9	52.9412	13	13	50	9	52.9412	5	0.384615	5	0.384615	13	13	50	9	52.9412	5	5	13	13	50	9	52.9412	5	5
SEVENTH	environmental_samples	1	1	1	1	100	1	100	1	1	100	1	100	1	1	1	1	1	1	100	1	100	1	1	1	1	100	1	100	1	1
SEVENTH	unclassified_Williamsia	8	7	2	2	25	2	28.5714	2	2	25	2	28.5714	2	1	2	1	2	2	25	2	28.5714	2	2	2	2	25	2	28.5714	2	2
FIFTH	Segniliparaceae	2	2	2	2	100	2	100	2	2	100	2	100	2	1	2	1	2	2	100	2	100	2	2	2	2	100	2	100	2	2
SIXTH	Segniliparus	2	2	2	2	100	2	100	2	2	100	2	100	2	1	2	1	2	2	100	2	100	2	2	2	2	100	2	100	2	2
FIFTH	Speluncibacteraceae	2	1	0	0	0	0	0	0	0	0	0	0	0	NA	0	NA	0	0	0	0	0	0	0	0	0	0	0	0	0	0
SIXTH	Speluncibacter	2	1	0	0	0	0	0	0	0	0	0	0	0	NA	0	NA	0	0	0	0	0	0	0	0	0	0	0	0	0	0
FIFTH	Tsukamurellaceae	45	20	2	2	4.44444	2	10	2	2	4.44444	2	10	1	0.5	1	0.5	2	2	4.44444	2	10	1	1	2	2	4.44444	2	10	1	1
SIXTH	Tsukamurella	45	20	2	2	4.44444	2	10	2	2	4.44444	2	10	1	0.5	1	0.5	2	2	4.44444	2	10	1	1	2	2	4.44444	2	10	1	1
SEVENTH	unclassified_Tsukamurella	8	8	2	2	25	2	25	2	2	25	2	25	1	0.5	1	0.5	2	2	25	2	25	1	1	2	2	25	2	25	1	1
FORTH	Nakamurellales	16	14	0	0	0	0	0	0	0	0	0	0	0	NA	0	NA	0	0	0	0	0	0	0	0	0	0	0	0	0	0
FIFTH	Nakamurellaceae	16	14	0	0	0	0	0	0	0	0	0	0	0	NA	0	NA	0	0	0	0	0	0	0	0	0	0	0	0	0	0
SIXTH	Nakamurella	16	14	0	0	0	0	0	0	0	0	0	0	0	NA	0	NA	0	0	0	0	0	0	0	0	0	0	0	0	0	0
SEVENTH	unclassified_Nakamurella	3	3	0	0	0	0	0	0	0	0	0	0	0	NA	0	NA	0	0	0	0	0	0	0	0	0	0	0	0	0	0
FORTH	Propionibacteriales	1515	535	206	193	12.7393	135	25.2336	194	182	12.0132	126	23.5514	86	0.443299	90	0.463918	193	181	11.9472	125	23.3645	85	89	178	169	11.1551	118	22.0561	77	79
FIFTH	Actinopolymorphaceae	12	9	7	7	58.3333	5	55.5556	7	7	58.3333	5	55.5556	2	0.285714	2	0.285714	7	7	58.3333	5	55.5556	2	2	7	7	58.3333	5	55.5556	2	2
SIXTH	Actinopolymorpha	12	9	7	7	58.3333	5	55.5556	7	7	58.3333	5	55.5556	2	0.285714	2	0.285714	7	7	58.3333	5	55.5556	2	2	7	7	58.3333	5	55.5556	2	2
SEVENTH	unclassified_Actinopolymorpha	4	4	3	3	75	3	75	3	3	75	3	75	1	0.333333	1	0.333333	3	3	75	3	75	1	1	3	3	75	3	75	1	1
FIFTH	Kribbellaceae	86	76	26	23	26.7442	23	30.2632	26	23	26.7442	23	30.2632	20	0.769231	21	0.807692	26	23	26.7442	23	30.2632	20	21	22	20	23.2558	20	26.3158	17	17
SIXTH	Kribbella	86	76	26	23	26.7442	23	30.2632	26	23	26.7442	23	30.2632	20	0.769231	21	0.807692	26	23	26.7442	23	30.2632	20	21	22	20	23.2558	20	26.3158	17	17
SEVENTH	unclassified_Kribbella	42	41	15	12	28.5714	12	29.2683	15	12	28.5714	12	29.2683	13	0.866667	13	0.866667	15	12	28.5714	12	29.2683	13	13	12	10	23.8095	10	24.3902	10	10
FIFTH	Nocardioidaceae	519	335	151	146	28.131	96	28.6567	141	136	26.2042	88	26.2687	52	0.368794	55	0.390071	140	135	26.0116	87	25.9701	51	54	130	126	24.2775	83	24.7761	47	49
SIXTH	Aeromicrobium	94	54	54	54	57.4468	31	57.4074	53	53	56.383	30	55.5556	14	0.264151	16	0.301887	52	52	55.3191	29	53.7037	13	15	48	48	51.0638	26	48.1481	12	13
SEVENTH	environmental_samples	2	1	1	1	50	1	100	1	1	50	1	100	1	1	1	1	1	1	50	1	100	1	1	1	1	50	1	100	1	1
SEVENTH	unclassified_Aeromicrobium	53	30	33	33	62.2642	18	60	32	32	60.3774	17	56.6667	8	0.25	9	0.28125	31	31	58.4906	16	53.3333	7	8	30	30	56.6038	15	50	6	7
SIXTH	Friedmanniella	4	2	0	0	0	0	0	0	0	0	0	0	0	NA	0	NA	0	0	0	0	0	0	0	0	0	0	0	0	0	0
SEVENTH	environmental_samples	3	1	0	0	0	0	0	0	0	0	0	0	0	NA	0	NA	0	0	0	0	0	0	0	0	0	0	0	0	0	0
SIXTH	Marmoricola	4	4	2	1	25	1	25	2	1	25	1	25	2	1	2	1	2	1	25	1	25	2	2	2	1	25	1	25	2	2
SEVENTH	unclassified_Marmoricola	3	3	0	0	0	0	0	0	0	0	0	0	0	NA	0	NA	0	0	0	0	0	0	0	0	0	0	0	0	0	0
SIXTH	Micropruina	4	3	0	0	0	0	0	0	0	0	0	0	0	NA	0	NA	0	0	0	0	0	0	0	0	0	0	0	0	0	0
SEVENTH	unclassified_Micropruina	2	2	0	0	0	0	0	0	0	0	0	0	0	NA	0	NA	0	0	0	0	0	0	0	0	0	0	0	0	0	0
SIXTH	Mumia	13	11	0	0	0	0	0	0	0	0	0	0	0	NA	0	NA	0	0	0	0	0	0	0	0	0	0	0	0	0	0
SEVENTH	unclassified_Mumia	8	7	0	0	0	0	0	0	0	0	0	0	0	NA	0	NA	0	0	0	0	0	0	0	0	0	0	0	0	0	0
SIXTH	Nocardioides	382	253	93	90	23.5602	63	24.9012	84	81	21.2042	56	22.1344	35	0.416667	36	0.428571	84	81	21.2042	56	22.1344	35	36	78	76	19.8953	55	21.7391	32	33
SEVENTH	environmental_samples	18	1	1	1	5.55556	1	100	1	1	5.55556	1	100	1	1	1	1	1	1	5.55556	1	100	1	1	1	1	5.55556	1	100	1	1
SEVENTH	unclassified_Nocardioides	155	103	46	43	27.7419	37	35.9223	42	39	25.1613	33	32.0388	19	0.452381	19	0.452381	42	39	25.1613	33	32.0388	19	19	41	39	25.1613	33	32.0388	18	18
SIXTH	Pimelobacter	9	2	0	0	0	0	0	0	0	0	0	0	0	NA	0	NA	0	0	0	0	0	0	0	0	0	0	0	0	0	0
SEVENTH	unclassified_Pimelobacter	1	1	0	0	0	0	0	0	0	0	0	0	0	NA	0	NA	0	0	0	0	0	0	0	0	0	0	0	0	0	0
SIXTH	Propionicicella	1	1	0	0	0	0	0	0	0	0	0	0	0	NA	0	NA	0	0	0	0	0	0	0	0	0	0	0	0	0	0
SIXTH	Propionicimonas	5	2	0	0	0	0	0	0	0	0	0	0	0	NA	0	NA	0	0	0	0	0	0	0	0	0	0	0	0	0	0
SEVENTH	unclassified_Propionicimonas	4	1	0	0	0	0	0	0	0	0	0	0	0	NA	0	NA	0	0	0	0	0	0	0	0	0	0	0	0	0	0
SIXTH	Solicola	1	1	0	0	0	0	0	0	0	0	0	0	0	NA	0	NA	0	0	0	0	0	0	0	0	0	0	0	0	0	0
SIXTH	Tenggerimyces	1	1	2	1	100	1	100	2	1	100	1	100	2	1	2	1	2	1	100	1	100	2	2	2	1	100	1	100	2	2
SIXTH	Thermasporomyces	1	1	0	0	0	0	0	0	0	0	0	0	0	NA	0	NA	0	0	0	0	0	0	0	0	0	0	0	0	0	0
FIFTH	Propionibacteriaceae	898	115	22	17	1.8931	11	9.56522	20	16	1.78174	10	8.69565	14	0.7	14	0.7	20	16	1.78174	10	8.69565	14	14	19	16	1.78174	10	8.69565	13	13
SIXTH	Acidipropionibacterium	29	5	0	0	0	0	0	0	0	0	0	0	0	NA	0	NA	0	0	0	0	0	0	0	0	0	0	0	0	0	0
SIXTH	Aestuariimicrobium	4	4	0	0	0	0	0	0	0	0	0	0	0	NA	0	NA	0	0	0	0	0	0	0	0	0	0	0	0	0	0
SEVENTH	unclassified_Aestuariimicrobium	2	2	0	0	0	0	0	0	0	0	0	0	0	NA	0	NA	0	0	0	0	0	0	0	0	0	0	0	0	0	0
SIXTH	Arachnia	21	3	0	0	0	0	0	0	0	0	0	0	0	NA	0	NA	0	0	0	0	0	0	0	0	0	0	0	0	0	0
SIXTH	Auraticoccus	2	2	2	2	100	2	100	2	2	100	2	100	2	1	2	1	2	2	100	2	100	2	2	2	2	100	2	100	2	2
SIXTH	Brooklawnia	4	3	0	0	0	0	0	0	0	0	0	0	0	NA	0	NA	0	0	0	0	0	0	0	0	0	0	0	0	0	0
SEVENTH	unclassified_Brooklawnia	1	1	0	0	0	0	0	0	0	0	0	0	0	NA	0	NA	0	0	0	0	0	0	0	0	0	0	0	0	0	0
SIXTH	Cutibacterium	605	11	2	1	0.165289	1	9.09091	0	0	0	0	0	0	NA	0	NA	0	0	0	0	0	0	0	0	0	0	0	0	0	0
SEVENTH	environmental_samples	3	1	0	0	0	0	0	0	0	0	0	0	0	NA	0	NA	0	0	0	0	0	0	0	0	0	0	0	0	0	0
SEVENTH	unclassified_Cutibacterium	9	3	0	0	0	0	0	0	0	0	0	0	0	NA	0	NA	0	0	0	0	0	0	0	0	0	0	0	0	0	0
SIXTH	Desertihabitans	2	2	1	1	50	1	50	1	1	50	1	50	1	1	1	1	1	1	50	1	50	1	1	1	1	50	1	50	1	1
SIXTH	Enemella	8	2	8	7	87.5	1	50	8	7	87.5	1	50	2	0.25	2	0.25	8	7	87.5	1	50	2	2	8	7	87.5	1	50	2	2
SIXTH	Granulicoccus	2	1	0	0	0	0	0	0	0	0	0	0	0	NA	0	NA	0	0	0	0	0	0	0	0	0	0	0	0	0	0
SIXTH	Luteococcus	9	8	0	0	0	0	0	0	0	0	0	0	0	NA	0	NA	0	0	0	0	0	0	0	0	0	0	0	0	0	0
SEVENTH	unclassified_Luteococcus	5	5	0	0	0	0	0	0	0	0	0	0	0	NA	0	NA	0	0	0	0	0	0	0	0	0	0	0	0	0	0
SIXTH	Microlunatus	18	16	6	4	22.2222	4	25	6	4	22.2222	4	25	6	1	6	1	6	4	22.2222	4	25	6	6	6	4	22.2222	4	25	6	6
SEVENTH	unclassified_Microlunatus	1	1	0	0	0	0	0	0	0	0	0	0	0	NA	0	NA	0	0	0	0	0	0	0	0	0	0	0	0	0	0
SIXTH	Naumannella	2	2	2	1	50	1	50	2	1	50	1	50	2	1	2	1	2	1	50	1	50	2	2	1	1	50	1	50	1	1
SIXTH	Nigerium	3	2	0	0	0	0	0	0	0	0	0	0	0	NA	0	NA	0	0	0	0	0	0	0	0	0	0	0	0	0	0
SEVENTH	unclassified_Nigerium	1	1	0	0	0	0	0	0	0	0	0	0	0	NA	0	NA	0	0	0	0	0	0	0	0	0	0	0	0	0	0
SIXTH	Parenemella	2	1	0	0	0	0	0	0	0	0	0	0	0	NA	0	NA	0	0	0	0	0	0	0	0	0	0	0	0	0	0
SIXTH	Propionibacterium	120	8	1	1	0.833333	1	12.5	1	1	0.833333	1	12.5	1	1	1	1	1	1	0.833333	1	12.5	1	1	1	1	0.833333	1	12.5	1	1
SEVENTH	environmental_samples	1	1	0	0	0	0	0	0	0	0	0	0	0	NA	0	NA	0	0	0	0	0	0	0	0	0	0	0	0	0	0
SEVENTH	unclassified_Propionibacterium	2	2	0	0	0	0	0	0	0	0	0	0	0	NA	0	NA	0	0	0	0	0	0	0	0	0	0	0	0	0	0
SIXTH	Propioniciclava	15	8	0	0	0	0	0	0	0	0	0	0	0	NA	0	NA	0	0	0	0	0	0	0	0	0	0	0	0	0	0
SEVENTH	unclassified_Propioniciclava	7	3	0	0	0	0	0	0	0	0	0	0	0	NA	0	NA	0	0	0	0	0	0	0	0	0	0	0	0	0	0
SIXTH	Propioniferax	2	1	0	0	0	0	0	0	0	0	0	0	0	NA	0	NA	0	0	0	0	0	0	0	0	0	0	0	0	0	0
SIXTH	Propionimicrobium	8	3	0	0	0	0	0	0	0	0	0	0	0	NA	0	NA	0	0	0	0	0	0	0	0	0	0	0	0	0	0
SEVENTH	unclassified_Propionimicrobium	2	2	0	0	0	0	0	0	0	0	0	0	0	NA	0	NA	0	0	0	0	0	0	0	0	0	0	0	0	0	0
SIXTH	Raineyella	5	5	0	0	0	0	0	0	0	0	0	0	0	NA	0	NA	0	0	0	0	0	0	0	0	0	0	0	0	0	0
SEVENTH	unclassified_Raineyella	3	3	0	0	0	0	0	0	0	0	0	0	0	NA	0	NA	0	0	0	0	0	0	0	0	0	0	0	0	0	0
SIXTH	Tessaracoccus	36	27	0	0	0	0	0	0	0	0	0	0	0	NA	0	NA	0	0	0	0	0	0	0	0	0	0	0	0	0	0
SEVENTH	environmental_samples	3	1	0	0	0	0	0	0	0	0	0	0	0	NA	0	NA	0	0	0	0	0	0	0	0	0	0	0	0	0	0
SEVENTH	unclassified_Tessaracoccus	12	10	0	0	0	0	0	0	0	0	0	0	0	NA	0	NA	0	0	0	0	0	0	0	0	0	0	0	0	0	0
SIXTH	Vaginimicrobium	1	1	0	0	0	0	0	0	0	0	0	0	0	NA	0	NA	0	0	0	0	0	0	0	0	0	0	0	0	0	0
FORTH	Pseudonocardiales	724	534	832	645	89.0884	482	90.2622	831	644	88.9503	481	90.0749	223	0.268351	243	0.292419	816	640	88.3978	480	89.8876	216	236	791	628	86.7403	473	88.5768	201	219
FIFTH	Pseudonocardiaceae	724	534	832	645	89.0884	482	90.2622	831	644	88.9503	481	90.0749	223	0.268351	243	0.292419	816	640	88.3978	480	89.8876	216	236	791	628	86.7403	473	88.5768	201	219
SIXTH	Actinoalloteichus	11	7	15	11	100	7	100	15	11	100	7	100	5	0.333333	5	0.333333	15	11	100	7	100	5	5	15	11	100	7	100	5	5
SEVENTH	unclassified_Actinoalloteichus	2	2	2	2	100	2	100	2	2	100	2	100	2	1	2	1	2	2	100	2	100	2	2	2	2	100	2	100	2	2
SIXTH	Actinocrispum	2	2	2	2	100	2	100	2	2	100	2	100	2	1	2	1	2	2	100	2	100	2	2	2	2	100	2	100	2	2
SEVENTH	unclassified_Actinocrispum	1	1	1	1	100	1	100	1	1	100	1	100	1	1	1	1	1	1	100	1	100	1	1	1	1	100	1	100	1	1
SIXTH	Actinokineospora	27	18	25	23	85.1852	15	83.3333	25	23	85.1852	15	83.3333	13	0.52	13	0.52	25	23	85.1852	15	83.3333	13	13	21	19	70.3704	12	66.6667	10	10
SEVENTH	unclassified_Actinokineospora	3	3	2	2	66.6667	2	66.6667	2	2	66.6667	2	66.6667	2	1	2	1	2	2	66.6667	2	66.6667	2	2	2	2	66.6667	2	66.6667	2	2
SIXTH	Actinomycetospora	26	21	21	21	80.7692	17	80.9524	21	21	80.7692	17	80.9524	6	0.285714	7	0.333333	21	21	80.7692	17	80.9524	6	7	21	21	80.7692	17	80.9524	6	7
SEVENTH	unclassified_Actinomycetospora	6	5	3	3	50	3	60	3	3	50	3	60	2	0.666667	3	1	3	3	50	3	60	2	3	3	3	50	3	60	2	3
SIXTH	Actinophytocola	15	6	9	7	46.6667	5	83.3333	9	7	46.6667	5	83.3333	7	0.777778	7	0.777778	9	7	46.6667	5	83.3333	7	7	8	7	46.6667	5	83.3333	7	7
SEVENTH	unclassified_Actinophytocola	9	1	2	2	22.2222	1	100	2	2	22.2222	1	100	2	1	2	1	2	2	22.2222	1	100	2	2	2	2	22.2222	1	100	2	2
SIXTH	Actinosynnema	12	9	17	11	91.6667	8	88.8889	17	11	91.6667	8	88.8889	7	0.411765	8	0.470588	12	11	91.6667	8	88.8889	6	7	11	10	83.3333	8	88.8889	6	7
SEVENTH	unclassified_Actinosynnema	7	7	7	6	85.7143	6	85.7143	7	6	85.7143	6	85.7143	5	0.714286	6	0.857143	7	6	85.7143	6	85.7143	5	6	7	6	85.7143	6	85.7143	5	6
SIXTH	Alloactinosynnema	1	1	0	0	0	0	0	0	0	0	0	0	0	NA	0	NA	0	0	0	0	0	0	0	0	0	0	0	0	0	0
SEVENTH	unclassified_Alloactinosynnema	1	1	0	0	0	0	0	0	0	0	0	0	0	NA	0	NA	0	0	0	0	0	0	0	0	0	0	0	0	0	0
SIXTH	Allokutzneria	5	4	7	5	100	4	100	7	5	100	4	100	4	0.571429	4	0.571429	7	5	100	4	100	4	4	5	5	100	4	100	2	2
SEVENTH	unclassified_Allokutzneria	2	2	2	2	100	2	100	2	2	100	2	100	2	1	2	1	2	2	100	2	100	2	2	2	2	100	2	100	2	2
SIXTH	Allosaccharopolyspora	1	1	1	1	100	1	100	1	1	100	1	100	1	1	1	1	1	1	100	1	100	1	1	1	1	100	1	100	1	1
SIXTH	Amycolatopsis	229	172	275	216	94.3231	161	93.6047	274	215	93.8865	160	93.0233	42	0.153285	48	0.175182	271	215	93.8865	160	93.0233	41	47	270	214	93.4498	159	92.4419	41	47
SEVENTH	unclassified_Amycolatopsis	99	92	120	97	97.9798	91	98.913	120	97	97.9798	91	98.913	22	0.183333	26	0.216667	120	97	97.9798	91	98.913	22	26	119	96	96.9697	90	97.8261	22	26
SIXTH	Crossiella	8	6	14	8	100	6	100	14	8	100	6	100	6	0.428571	6	0.428571	14	8	100	6	100	6	6	12	8	100	6	100	5	5
SEVENTH	unclassified_Crossiella	4	4	6	4	100	4	100	6	4	100	4	100	3	0.5	3	0.5	6	4	100	4	100	3	3	6	4	100	4	100	3	3
SIXTH	Gandjariella	1	1	1	1	100	1	100	1	1	100	1	100	1	1	1	1	1	1	100	1	100	1	1	1	1	100	1	100	1	1
SIXTH	Goodfellowiella	1	1	1	1	100	1	100	1	1	100	1	100	1	1	1	1	1	1	100	1	100	1	1	1	1	100	1	100	1	1
SIXTH	Haloechinothrix	5	5	0	0	0	0	0	0	0	0	0	0	0	NA	0	NA	0	0	0	0	0	0	0	0	0	0	0	0	0	0
SEVENTH	unclassified_Haloechinothrix	1	1	0	0	0	0	0	0	0	0	0	0	0	NA	0	NA	0	0	0	0	0	0	0	0	0	0	0	0	0	0
SIXTH	Halosaccharopolyspora	1	1	1	1	100	1	100	1	1	100	1	100	1	1	1	1	1	1	100	1	100	1	1	1	1	100	1	100	1	1
SIXTH	Herbihabitans	1	1	2	1	100	1	100	2	1	100	1	100	2	1	2	1	2	1	100	1	100	2	2	2	1	100	1	100	2	2
SIXTH	Kibdelosporangium	8	6	12	7	87.5	5	83.3333	12	7	87.5	5	83.3333	6	0.5	6	0.5	12	7	87.5	5	83.3333	6	6	12	7	87.5	5	83.3333	6	6
SEVENTH	unclassified_Kibdelosporangium	1	1	2	1	100	1	100	2	1	100	1	100	2	1	2	1	2	1	100	1	100	2	2	2	1	100	1	100	2	2
SIXTH	Kutzneria	10	8	9	9	90	7	87.5	9	9	90	7	87.5	4	0.444444	4	0.444444	8	8	80	7	87.5	3	3	8	8	80	7	87.5	3	3
SEVENTH	unclassified_Kutzneria	3	3	2	2	66.6667	2	66.6667	2	2	66.6667	2	66.6667	2	1	2	1	2	2	66.6667	2	66.6667	2	2	2	2	66.6667	2	66.6667	2	2
SIXTH	Labedaea	1	1	0	0	0	0	0	0	0	0	0	0	0	NA	0	NA	0	0	0	0	0	0	0	0	0	0	0	0	0	0
SIXTH	Lentzea	49	40	95	49	100	40	100	95	49	100	40	100	11	0.115789	12	0.126316	95	49	100	40	100	11	12	93	48	97.9592	39	97.5	10	11
SEVENTH	unclassified_Lentzea	17	16	33	17	100	16	100	33	17	100	16	100	8	0.242424	8	0.242424	33	17	100	16	100	8	8	33	17	100	16	100	8	8
SIXTH	Longimycelium	1	1	1	1	100	1	100	1	1	100	1	100	1	1	1	1	1	1	100	1	100	1	1	1	1	100	1	100	1	1
SIXTH	Prauserella	21	15	24	20	95.2381	14	93.3333	24	20	95.2381	14	93.3333	10	0.416667	10	0.416667	22	20	95.2381	14	93.3333	9	9	22	20	95.2381	14	93.3333	9	9
SEVENTH	unclassified_Prauserella	1	1	1	1	100	1	100	1	1	100	1	100	1	1	1	1	1	1	100	1	100	1	1	1	1	100	1	100	1	1
SIXTH	Pseudonocardia	131	95	138	117	89.313	87	91.5789	138	117	89.313	87	91.5789	48	0.347826	53	0.384058	135	115	87.7863	86	90.5263	46	51	128	111	84.7328	85	89.4737	41	46
SEVENTH	environmental_samples	1	1	1	1	100	1	100	1	1	100	1	100	1	1	1	1	1	1	100	1	100	1	1	1	1	100	1	100	1	1
SEVENTH	unclassified_Pseudonocardia	57	47	57	51	89.4737	44	93.617	57	51	89.4737	44	93.617	21	0.368421	23	0.403509	55	49	85.9649	43	91.4894	20	22	52	47	82.4561	43	91.4894	18	20
SIXTH	Qaidamihabitans	1	1	1	1	100	1	100	1	1	100	1	100	1	1	1	1	1	1	100	1	100	1	1	1	1	100	1	100	1	1
SIXTH	Saccharomonospora	28	15	12	12	42.8571	8	53.3333	12	12	42.8571	8	53.3333	5	0.416667	5	0.416667	12	12	42.8571	8	53.3333	5	5	11	11	39.2857	7	46.6667	4	4
SEVENTH	unclassified_Saccharomonospora	4	4	2	2	50	2	50	2	2	50	2	50	2	1	2	1	2	2	50	2	50	2	2	2	2	50	2	50	2	2
SIXTH	Saccharopolyspora	75	49	96	74	98.6667	48	97.9592	96	74	98.6667	48	97.9592	23	0.239583	24	0.25	95	73	97.3333	48	97.9592	22	23	93	73	97.3333	48	97.9592	21	21
SEVENTH	unclassified_Saccharopolyspora	17	17	18	16	94.1176	16	94.1176	18	16	94.1176	16	94.1176	8	0.444444	8	0.444444	18	16	94.1176	16	94.1176	8	8	18	16	94.1176	16	94.1176	8	8
SIXTH	Saccharothrix	39	33	37	34	87.1795	29	87.8788	37	34	87.1795	29	87.8788	16	0.432432	17	0.459459	37	34	87.1795	29	87.8788	16	17	36	34	87.1795	29	87.8788	15	16
SEVENTH	unclassified_Saccharothrix	14	14	12	12	85.7143	12	85.7143	12	12	85.7143	12	85.7143	5	0.416667	6	0.5	12	12	85.7143	12	85.7143	5	6	12	12	85.7143	12	85.7143	5	6
SIXTH	Sciscionella	2	2	3	2	100	2	100	3	2	100	2	100	2	0.666667	2	0.666667	3	2	100	2	100	2	2	3	2	100	2	100	2	2
SIXTH	Solihabitans	1	1	1	1	100	1	100	1	1	100	1	100	1	1	1	1	1	1	100	1	100	1	1	1	1	100	1	100	1	1
SIXTH	Streptoalloteichus	2	2	4	2	100	2	100	4	2	100	2	100	3	0.75	4	1	4	2	100	2	100	3	4	4	2	100	2	100	3	4
SIXTH	Tamaricihabitans	1	1	1	1	100	1	100	1	1	100	1	100	1	1	1	1	1	1	100	1	100	1	1	1	1	100	1	100	1	1
SIXTH	Thermocrispum	3	3	1	1	33.3333	1	33.3333	1	1	33.3333	1	33.3333	1	1	1	1	1	1	33.3333	1	33.3333	1	1	1	1	33.3333	1	33.3333	1	1
SEVENTH	unclassified_Thermocrispum	1	1	0	0	0	0	0	0	0	0	0	0	0	NA	0	NA	0	0	0	0	0	0	0	0	0	0	0	0	0	0
SIXTH	Umezawaea	5	5	6	5	100	5	100	6	5	100	5	100	3	0.5	4	0.666667	6	5	100	5	100	3	4	5	5	100	5	100	2	3
SEVENTH	unclassified_Umezawaea	2	2	2	2	100	2	100	2	2	100	2	100	1	0.5	2	1	2	2	100	2	100	1	2	2	2	100	2	100	1	2
FORTH	Sporichthyales	4	4	0	0	0	0	0	0	0	0	0	0	0	NA	0	NA	0	0	0	0	0	0	0	0	0	0	0	0	0	0
FIFTH	Sporichthyaceae	4	4	0	0	0	0	0	0	0	0	0	0	0	NA	0	NA	0	0	0	0	0	0	0	0	0	0	0	0	0	0
SIXTH	Epidermidibacterium	1	1	0	0	0	0	0	0	0	0	0	0	0	NA	0	NA	0	0	0	0	0	0	0	0	0	0	0	0	0	0
SIXTH	Sporichthya	3	3	0	0	0	0	0	0	0	0	0	0	0	NA	0	NA	0	0	0	0	0	0	0	0	0	0	0	0	0	0
SEVENTH	unclassified_Sporichthya	1	1	0	0	0	0	0	0	0	0	0	0	0	NA	0	NA	0	0	0	0	0	0	0	0	0	0	0	0	0	0
FORTH	Streptosporangiales	736	532	926	662	89.9457	481	90.4135	923	662	89.9457	481	90.4135	170	0.184182	265	0.287107	820	641	87.0924	465	87.406	158	239	790	628	85.3261	455	85.5263	144	224
FIFTH	Nocardiopsaceae	156	99	202	142	91.0256	93	93.9394	202	142	91.0256	93	93.9394	36	0.178218	60	0.29703	175	137	87.8205	91	91.9192	31	49	174	136	87.1795	90	90.9091	30	48
SIXTH	Actinorugispora	1	1	2	1	100	1	100	2	1	100	1	100	1	0.5	2	1	2	1	100	1	100	1	2	2	1	100	1	100	1	2
SIXTH	Allosalinactinospora	1	1	1	1	100	1	100	1	1	100	1	100	1	1	1	1	1	1	100	1	100	1	1	1	1	100	1	100	1	1
SIXTH	Haloactinospora	1	1	1	1	100	1	100	1	1	100	1	100	1	1	1	1	1	1	100	1	100	1	1	1	1	100	1	100	1	1
SIXTH	Lipingzhangella	2	2	1	1	50	1	50	1	1	50	1	50	1	1	1	1	1	1	50	1	50	1	1	1	1	50	1	50	1	1
SIXTH	Marinactinospora	1	1	1	1	100	1	100	1	1	100	1	100	1	1	1	1	1	1	100	1	100	1	1	1	1	100	1	100	1	1
SIXTH	Marinitenerispora	3	1	3	3	100	1	100	3	3	100	1	100	1	0.333333	1	0.333333	0	0	0	0	0	0	0	0	0	0	0	0	0	0
SIXTH	Murinocardiopsis	1	1	1	1	100	1	100	1	1	100	1	100	1	1	1	1	1	1	100	1	100	1	1	1	1	100	1	100	1	1
SIXTH	Nocardiopsis	115	74	173	114	99.1304	73	98.6486	173	114	99.1304	73	98.6486	24	0.138728	43	0.248555	149	112	97.3913	72	97.2973	20	33	148	111	96.5217	71	95.9459	19	32
SEVENTH	unclassified_Nocardiopsis	34	34	54	33	97.0588	33	97.0588	54	33	97.0588	33	97.0588	13	0.240741	24	0.444444	41	32	94.1176	32	94.1176	11	19	40	31	91.1765	31	91.1765	10	18
SIXTH	Salinactinospora	1	1	1	1	100	1	100	1	1	100	1	100	1	1	1	1	1	1	100	1	100	1	1	1	1	100	1	100	1	1
SIXTH	Spinactinospora	2	1	2	2	100	1	100	2	2	100	1	100	1	0.5	1	0.5	2	2	100	1	100	1	1	2	2	100	1	100	1	1
SIXTH	Spiractinospora	1	1	1	1	100	1	100	1	1	100	1	100	1	1	1	1	1	1	100	1	100	1	1	1	1	100	1	100	1	1
SIXTH	Streptomonospora	12	9	12	12	100	9	100	12	12	100	9	100	3	0.25	5	0.416667	12	12	100	9	100	3	5	12	12	100	9	100	3	5
SEVENTH	unclassified_Streptomonospora	2	2	2	2	100	2	100	2	2	100	2	100	1	0.5	2	1	2	2	100	2	100	1	2	2	2	100	2	100	1	2
SIXTH	Thermobifida	15	5	3	3	20	1	20	3	3	20	1	20	1	0.333333	1	0.333333	3	3	20	1	20	1	1	3	3	20	1	20	1	1
SEVENTH	unclassified_Thermobifida	1	1	0	0	0	0	0	0	0	0	0	0	0	NA	0	NA	0	0	0	0	0	0	0	0	0	0	0	0	0	0
FIFTH	Streptosporangiaceae	408	293	483	362	88.7255	260	88.7372	482	362	88.7255	260	88.7372	72	0.149378	115	0.238589	411	346	84.8039	246	83.959	66	101	390	338	82.8431	241	82.2526	60	94
SIXTH	Acrocarpospora	9	6	6	6	66.6667	4	66.6667	6	6	66.6667	4	66.6667	3	0.5	2	0.333333	6	6	66.6667	4	66.6667	3	2	6	6	66.6667	4	66.6667	3	2
SEVENTH	unclassified_Acrocarpospora	1	1	1	1	100	1	100	1	1	100	1	100	1	1	1	1	1	1	100	1	100	1	1	1	1	100	1	100	1	1
SIXTH	Bailinhaonella	1	1	1	1	100	1	100	1	1	100	1	100	1	1	1	1	1	1	100	1	100	1	1	1	1	100	1	100	1	1
SIXTH	Herbidospora	9	8	9	9	100	8	100	9	9	100	8	100	1	0.111111	2	0.222222	9	9	100	8	100	1	2	9	9	100	8	100	1	2
SEVENTH	unclassified_Herbidospora	1	1	1	1	100	1	100	1	1	100	1	100	1	1	1	1	1	1	100	1	100	1	1	1	1	100	1	100	1	1
SIXTH	Microbispora	60	36	63	58	96.6667	34	94.4444	63	58	96.6667	34	94.4444	7	0.111111	8	0.126984	62	57	95	33	91.6667	6	7	58	57	95	33	91.6667	5	6
SEVENTH	unclassified_Microbispora	22	22	20	20	90.9091	20	90.9091	20	20	90.9091	20	90.9091	4	0.2	5	0.25	19	19	86.3636	19	86.3636	3	4	19	19	86.3636	19	86.3636	3	4
SIXTH	Microtetraspora	7	7	7	6	85.7143	6	85.7143	7	6	85.7143	6	85.7143	6	0.857143	6	0.857143	6	5	71.4286	5	71.4286	5	5	4	4	57.1429	4	57.1429	3	3
SEVENTH	unclassified_Microtetraspora	3	3	2	2	66.6667	2	66.6667	2	2	66.6667	2	66.6667	2	1	2	1	2	2	66.6667	2	66.6667	2	2	2	2	66.6667	2	66.6667	2	2
SIXTH	Nonomuraea	187	139	289	185	98.9305	137	98.5612	288	185	98.9305	137	98.5612	43	0.149306	65	0.225694	226	176	94.1176	130	93.5252	38	53	217	175	93.5829	129	92.8058	34	49
SEVENTH	unclassified_Nonomuraea	79	79	123	78	98.7342	78	98.7342	123	78	98.7342	78	98.7342	27	0.219512	38	0.308943	95	72	91.1392	72	91.1392	23	29	91	71	89.8734	71	89.8734	21	27
SIXTH	Planobispora	6	4	0	0	0	0	0	0	0	0	0	0	0	NA	0	NA	0	0	0	0	0	0	0	0	0	0	0	0	0	0
SIXTH	Planomonospora	11	7	5	4	36.3636	3	42.8571	5	4	36.3636	3	42.8571	3	0.6	3	0.6	5	4	36.3636	3	42.8571	3	3	5	4	36.3636	3	42.8571	3	3
SEVENTH	unclassified_Planomonospora	3	3	1	1	33.3333	1	33.3333	1	1	33.3333	1	33.3333	1	1	1	1	1	1	33.3333	1	33.3333	1	1	1	1	33.3333	1	33.3333	1	1
SIXTH	Planotetraspora	10	7	10	8	80	5	71.4286	10	8	80	5	71.4286	2	0.2	2	0.2	10	8	80	5	71.4286	2	2	10	8	80	5	71.4286	2	2
SEVENTH	unclassified_Planotetraspora	2	2	0	0	0	0	0	0	0	0	0	0	0	NA	0	NA	0	0	0	0	0	0	0	0	0	0	0	0	0	0
SIXTH	Rhizohabitans	1	1	0	0	0	0	0	0	0	0	0	0	0	NA	0	NA	0	0	0	0	0	0	0	0	0	0	0	0	0	0
SIXTH	Sinosporangium	2	2	1	1	50	1	50	1	1	50	1	50	1	1	1	1	1	1	50	1	50	1	1	1	1	50	1	50	1	1
SIXTH	Sphaerimonospora	1	1	0	0	0	0	0	0	0	0	0	0	0	NA	0	NA	0	0	0	0	0	0	0	0	0	0	0	0	0	0
SIXTH	Sphaerisporangium	22	18	20	20	90.9091	17	94.4444	20	20	90.9091	17	94.4444	10	0.5	13	0.65	19	19	86.3636	16	88.8889	9	12	19	19	86.3636	16	88.8889	9	12
SEVENTH	unclassified_Sphaerisporangium	8	8	8	8	100	8	100	8	8	100	8	100	6	0.75	6	0.75	7	7	87.5	7	87.5	5	5	7	7	87.5	7	87.5	5	5
SIXTH	Spongiactinospora	3	3	3	3	100	3	100	3	3	100	3	100	2	0.666667	2	0.666667	3	3	100	3	100	2	2	2	2	66.6667	2	66.6667	1	1
SEVENTH	unclassified_Spongiactinospora	1	1	1	1	100	1	100	1	1	100	1	100	1	1	1	1	1	1	100	1	100	1	1	0	0	0	0	0	0	0
SIXTH	Streptosporangium	70	48	67	59	84.2857	40	83.3333	67	59	84.2857	40	83.3333	16	0.238806	21	0.313433	61	55	78.5714	36	75	13	18	56	50	71.4286	34	70.8333	11	17
SEVENTH	unclassified_Streptosporangium	30	30	25	23	76.6667	23	76.6667	25	23	76.6667	23	76.6667	11	0.44	14	0.56	21	20	66.6667	20	66.6667	9	11	19	18	60	18	60	8	11
SIXTH	Thermoactinospora	1	1	0	0	0	0	0	0	0	0	0	0	0	NA	0	NA	0	0	0	0	0	0	0	0	0	0	0	0	0	0
SIXTH	Thermobispora	3	1	0	0	0	0	0	0	0	0	0	0	0	NA	0	NA	0	0	0	0	0	0	0	0	0	0	0	0	0	0
SIXTH	Thermocatellispora	2	1	2	2	100	1	100	2	2	100	1	100	1	0.5	1	0.5	2	2	100	1	100	1	1	2	2	100	1	100	1	1
SIXTH	Thermopolyspora	3	2	0	0	0	0	0	0	0	0	0	0	0	NA	0	NA	0	0	0	0	0	0	0	0	0	0	0	0	0	0
SEVENTH	unclassified_Thermopolyspora	1	1	0	0	0	0	0	0	0	0	0	0	0	NA	0	NA	0	0	0	0	0	0	0	0	0	0	0	0	0	0
FIFTH	Streptosporangiales_incertae_sedis	1	1	2	1	100	1	100	2	1	100	1	100	2	1	2	1	2	1	100	1	100	2	2	2	1	100	1	100	2	2
SIXTH	Allonocardiopsis	1	1	2	1	100	1	100	2	1	100	1	100	2	1	2	1	2	1	100	1	100	2	2	2	1	100	1	100	2	2
FIFTH	Thermomonosporaceae	169	137	239	157	92.8994	127	92.7007	237	157	92.8994	127	92.7007	70	0.295359	94	0.396624	232	157	92.8994	127	92.7007	69	92	224	153	90.5325	123	89.781	62	85
SIXTH	Actinoallomurus	15	13	26	15	100	13	100	26	15	100	13	100	7	0.269231	8	0.307692	26	15	100	13	100	7	8	26	15	100	13	100	7	8
SEVENTH	unclassified_Actinoallomurus	4	4	8	4	100	4	100	8	4	100	4	100	5	0.625	5	0.625	8	4	100	4	100	5	5	8	4	100	4	100	5	5
SIXTH	Actinocorallia	10	10	6	6	60	6	60	6	6	60	6	60	4	0.666667	5	0.833333	6	6	60	6	60	4	5	5	5	50	5	50	3	4
SEVENTH	unclassified_Actinocorallia	3	3	1	1	33.3333	1	33.3333	1	1	33.3333	1	33.3333	1	1	1	1	1	1	33.3333	1	33.3333	1	1	1	1	33.3333	1	33.3333	1	1
SIXTH	Actinomadura	130	100	195	126	96.9231	98	98	193	126	96.9231	98	98	55	0.284974	75	0.388601	189	126	96.9231	98	98	55	74	182	123	94.6154	95	95	49	68
SEVENTH	unclassified_Actinomadura	37	37	61	37	100	37	100	59	37	100	37	100	29	0.491525	36	0.610169	58	37	100	37	100	29	36	54	35	94.5946	35	94.5946	25	32
SIXTH	Spirillospora	5	5	6	4	80	4	80	6	4	80	4	80	6	1	6	1	5	4	80	4	80	5	5	5	4	80	4	80	5	5
SEVENTH	unclassified_Spirillospora	4	4	6	4	100	4	100	6	4	100	4	100	6	1	6	1	5	4	100	4	100	5	5	5	4	100	4	100	5	5
SIXTH	Thermomonospora	8	8	5	5	62.5	5	62.5	5	5	62.5	5	62.5	3	0.6	3	0.6	5	5	62.5	5	62.5	3	3	5	5	62.5	5	62.5	3	3
SEVENTH	environmental_samples	1	1	0	0	0	0	0	0	0	0	0	0	0	NA	0	NA	0	0	0	0	0	0	0	0	0	0	0	0	0	0
SEVENTH	unclassified_Thermomonospora	1	1	0	0	0	0	0	0	0	0	0	0	0	NA	0	NA	0	0	0	0	0	0	0	0	0	0	0	0	0	0
SIXTH	Thermostaphylospora	1	1	1	1	100	1	100	1	1	100	1	100	1	1	1	1	1	1	100	1	100	1	1	1	1	100	1	100	1	1
FIFTH	Treboniaceae	2	2	0	0	0	0	0	0	0	0	0	0	0	NA	0	NA	0	0	0	0	0	0	0	0	0	0	0	0	0	0
SIXTH	Trebonia	2	2	0	0	0	0	0	0	0	0	0	0	0	NA	0	NA	0	0	0	0	0	0	0	0	0	0	0	0	0	0
SEVENTH	unclassified_Trebonia	1	1	0	0	0	0	0	0	0	0	0	0	0	NA	0	NA	0	0	0	0	0	0	0	0	0	0	0	0	0	0
THIRD	Actinomycetota_incertae_sedis	7	1	1	1	14.2857	1	100	0	0	0	0	0	0	NA	0	NA	0	0	0	0	0	0	0	0	0	0	0	0	0	0
FORTH	Candidatus_Hakubellales	7	1	1	1	14.2857	1	100	0	0	0	0	0	0	NA	0	NA	0	0	0	0	0	0	0	0	0	0	0	0	0	0
FIFTH	Candidatus_Hakubellaceae	7	1	1	1	14.2857	1	100	0	0	0	0	0	0	NA	0	NA	0	0	0	0	0	0	0	0	0	0	0	0	0	0
SIXTH	Candidatus_Hakubella	7	1	1	1	14.2857	1	100	0	0	0	0	0	0	NA	0	NA	0	0	0	0	0	0	0	0	0	0	0	0	0	0
THIRD	Candidatus_Aquicultoria	5	2	0	0	0	0	0	0	0	0	0	0	0	NA	0	NA	0	0	0	0	0	0	0	0	0	0	0	0	0	0
FORTH	Candidatus_Aquicultorales	4	1	0	0	0	0	0	0	0	0	0	0	0	NA	0	NA	0	0	0	0	0	0	0	0	0	0	0	0	0	0
FIFTH	Candidatus_Aquicultoraceae	4	1	0	0	0	0	0	0	0	0	0	0	0	NA	0	NA	0	0	0	0	0	0	0	0	0	0	0	0	0	0
SIXTH	Candidatus_Aquicultor	4	1	0	0	0	0	0	0	0	0	0	0	0	NA	0	NA	0	0	0	0	0	0	0	0	0	0	0	0	0	0
FORTH	Candidatus_Subteraquimicrobiales	1	1	0	0	0	0	0	0	0	0	0	0	0	NA	0	NA	0	0	0	0	0	0	0	0	0	0	0	0	0	0
FIFTH	Candidatus_Oleimmundimicrobiaceae	1	1	0	0	0	0	0	0	0	0	0	0	0	NA	0	NA	0	0	0	0	0	0	0	0	0	0	0	0	0	0
SIXTH	Candidatus_Oleimmundimicrobium	1	1	0	0	0	0	0	0	0	0	0	0	0	NA	0	NA	0	0	0	0	0	0	0	0	0	0	0	0	0	0
SEVENTH	unclassified_Candidatus_Oleimmundimicrobium	1	1	0	0	0	0	0	0	0	0	0	0	0	NA	0	NA	0	0	0	0	0	0	0	0	0	0	0	0	0	0
THIRD	Candidatus_Geothermincolia	1	1	0	0	0	0	0	0	0	0	0	0	0	NA	0	NA	0	0	0	0	0	0	0	0	0	0	0	0	0	0
FORTH	Candidatus_Geothermincolales	1	1	0	0	0	0	0	0	0	0	0	0	0	NA	0	NA	0	0	0	0	0	0	0	0	0	0	0	0	0	0
FIFTH	Candidatus_Geothermincolaceae	1	1	0	0	0	0	0	0	0	0	0	0	0	NA	0	NA	0	0	0	0	0	0	0	0	0	0	0	0	0	0
SIXTH	Candidatus_Solincola	1	1	0	0	0	0	0	0	0	0	0	0	0	NA	0	NA	0	0	0	0	0	0	0	0	0	0	0	0	0	0
THIRD	Coriobacteriia	1120	299	1	1	0.0892857	1	0.334448	1	1	0.0892857	1	0.334448	1	1	1	1	1	1	0.0892857	1	0.334448	1	1	1	1	0.0892857	1	0.334448	1	1
FORTH	Anaerosomatales	2	2	0	0	0	0	0	0	0	0	0	0	0	NA	0	NA	0	0	0	0	0	0	0	0	0	0	0	0	0	0
FIFTH	Anaerosomataceae	2	2	0	0	0	0	0	0	0	0	0	0	0	NA	0	NA	0	0	0	0	0	0	0	0	0	0	0	0	0	0
SIXTH	Anaerosoma	1	1	0	0	0	0	0	0	0	0	0	0	0	NA	0	NA	0	0	0	0	0	0	0	0	0	0	0	0	0	0
SIXTH	Parvivirga	1	1	0	0	0	0	0	0	0	0	0	0	0	NA	0	NA	0	0	0	0	0	0	0	0	0	0	0	0	0	0
FORTH	Coriobacteriales	737	216	0	0	0	0	0	0	0	0	0	0	0	NA	0	NA	0	0	0	0	0	0	0	0	0	0	0	0	0	0
FIFTH	Atopobiaceae	191	68	0	0	0	0	0	0	0	0	0	0	0	NA	0	NA	0	0	0	0	0	0	0	0	0	0	0	0	0	0
SIXTH	Atopobium	19	11	0	0	0	0	0	0	0	0	0	0	0	NA	0	NA	0	0	0	0	0	0	0	0	0	0	0	0	0	0
SEVENTH	environmental_samples	1	1	0	0	0	0	0	0	0	0	0	0	0	NA	0	NA	0	0	0	0	0	0	0	0	0	0	0	0	0	0
SEVENTH	unclassified_Atopobium	8	7	0	0	0	0	0	0	0	0	0	0	0	NA	0	NA	0	0	0	0	0	0	0	0	0	0	0	0	0	0
SIXTH	Caniella	1	1	0	0	0	0	0	0	0	0	0	0	0	NA	0	NA	0	0	0	0	0	0	0	0	0	0	0	0	0	0
SIXTH	Fannyhessea	17	1	0	0	0	0	0	0	0	0	0	0	0	NA	0	NA	0	0	0	0	0	0	0	0	0	0	0	0	0	0
SIXTH	Lancefieldella	21	3	0	0	0	0	0	0	0	0	0	0	0	NA	0	NA	0	0	0	0	0	0	0	0	0	0	0	0	0	0
SEVENTH	unclassified_Lancefieldella	1	1	0	0	0	0	0	0	0	0	0	0	0	NA	0	NA	0	0	0	0	0	0	0	0	0	0	0	0	0	0
SIXTH	Muricaecibacterium	1	1	0	0	0	0	0	0	0	0	0	0	0	NA	0	NA	0	0	0	0	0	0	0	0	0	0	0	0	0	0
SIXTH	Olsenella	52	36	0	0	0	0	0	0	0	0	0	0	0	NA	0	NA	0	0	0	0	0	0	0	0	0	0	0	0	0	0
SEVENTH	environmental_samples	2	1	0	0	0	0	0	0	0	0	0	0	0	NA	0	NA	0	0	0	0	0	0	0	0	0	0	0	0	0	0
SEVENTH	unclassified_Olsenella	27	27	0	0	0	0	0	0	0	0	0	0	0	NA	0	NA	0	0	0	0	0	0	0	0	0	0	0	0	0	0
SIXTH	Parafannyhessea	17	1	0	0	0	0	0	0	0	0	0	0	0	NA	0	NA	0	0	0	0	0	0	0	0	0	0	0	0	0	0
SIXTH	Paratractidigestivibacter	15	2	0	0	0	0	0	0	0	0	0	0	0	NA	0	NA	0	0	0	0	0	0	0	0	0	0	0	0	0	0
SEVENTH	unclassified_Paratractidigestivibacter	11	1	0	0	0	0	0	0	0	0	0	0	0	NA	0	NA	0	0	0	0	0	0	0	0	0	0	0	0	0	0
SIXTH	Parolsenella	32	4	0	0	0	0	0	0	0	0	0	0	0	NA	0	NA	0	0	0	0	0	0	0	0	0	0	0	0	0	0
SEVENTH	environmental_samples	15	1	0	0	0	0	0	0	0	0	0	0	0	NA	0	NA	0	0	0	0	0	0	0	0	0	0	0	0	0	0
SEVENTH	unclassified_Parolsenella	2	1	0	0	0	0	0	0	0	0	0	0	0	NA	0	NA	0	0	0	0	0	0	0	0	0	0	0	0	0	0
SIXTH	Thermophilibacter	11	5	0	0	0	0	0	0	0	0	0	0	0	NA	0	NA	0	0	0	0	0	0	0	0	0	0	0	0	0	0
SEVENTH	unclassified_Thermophilibacter	1	1	0	0	0	0	0	0	0	0	0	0	0	NA	0	NA	0	0	0	0	0	0	0	0	0	0	0	0	0	0
SIXTH	Tractidigestivibacter	5	3	0	0	0	0	0	0	0	0	0	0	0	NA	0	NA	0	0	0	0	0	0	0	0	0	0	0	0	0	0
SEVENTH	unclassified_Tractidigestivibacter	2	1	0	0	0	0	0	0	0	0	0	0	0	NA	0	NA	0	0	0	0	0	0	0	0	0	0	0	0	0	0
FIFTH	Coriobacteriaceae	540	145	0	0	0	0	0	0	0	0	0	0	0	NA	0	NA	0	0	0	0	0	0	0	0	0	0	0	0	0	0
SIXTH	Collinsella	455	129	0	0	0	0	0	0	0	0	0	0	0	NA	0	NA	0	0	0	0	0	0	0	0	0	0	0	0	0	0
SEVENTH	environmental_samples	4	1	0	0	0	0	0	0	0	0	0	0	0	NA	0	NA	0	0	0	0	0	0	0	0	0	0	0	0	0	0
SEVENTH	unclassified_Collinsella	116	116	0	0	0	0	0	0	0	0	0	0	0	NA	0	NA	0	0	0	0	0	0	0	0	0	0	0	0	0	0
SIXTH	Coriobacterium	1	1	0	0	0	0	0	0	0	0	0	0	0	NA	0	NA	0	0	0	0	0	0	0	0	0	0	0	0	0	0
SIXTH	Enorma	32	8	0	0	0	0	0	0	0	0	0	0	0	NA	0	NA	0	0	0	0	0	0	0	0	0	0	0	0	0	0
SEVENTH	environmental_samples	7	1	0	0	0	0	0	0	0	0	0	0	0	NA	0	NA	0	0	0	0	0	0	0	0	0	0	0	0	0	0
SEVENTH	unclassified_Enorma	3	1	0	0	0	0	0	0	0	0	0	0	0	NA	0	NA	0	0	0	0	0	0	0	0	0	0	0	0	0	0
SIXTH	Olegusella	5	2	0	0	0	0	0	0	0	0	0	0	0	NA	0	NA	0	0	0	0	0	0	0	0	0	0	0	0	0	0
SEVENTH	environmental_samples	1	1	0	0	0	0	0	0	0	0	0	0	0	NA	0	NA	0	0	0	0	0	0	0	0	0	0	0	0	0	0
SIXTH	Parvibacter	10	1	0	0	0	0	0	0	0	0	0	0	0	NA	0	NA	0	0	0	0	0	0	0	0	0	0	0	0	0	0
SIXTH	Senegalimassilia	37	4	0	0	0	0	0	0	0	0	0	0	0	NA	0	NA	0	0	0	0	0	0	0	0	0	0	0	0	0	0
SEVENTH	environmental_samples	18	1	0	0	0	0	0	0	0	0	0	0	0	NA	0	NA	0	0	0	0	0	0	0	0	0	0	0	0	0	0
SEVENTH	unclassified_Senegalimassilia	2	1	0	0	0	0	0	0	0	0	0	0	0	NA	0	NA	0	0	0	0	0	0	0	0	0	0	0	0	0	0
FIFTH	Kribbibacteriaceae	6	3	0	0	0	0	0	0	0	0	0	0	0	NA	0	NA	0	0	0	0	0	0	0	0	0	0	0	0	0	0
SIXTH	Granulimonas	2	1	0	0	0	0	0	0	0	0	0	0	0	NA	0	NA	0	0	0	0	0	0	0	0	0	0	0	0	0	0
SIXTH	Kribbibacterium	2	1	0	0	0	0	0	0	0	0	0	0	0	NA	0	NA	0	0	0	0	0	0	0	0	0	0	0	0	0	0
SIXTH	Leptogranulimonas	2	1	0	0	0	0	0	0	0	0	0	0	0	NA	0	NA	0	0	0	0	0	0	0	0	0	0	0	0	0	0
FORTH	Eggerthellales	381	81	1	1	0.262467	1	1.23457	1	1	0.262467	1	1.23457	1	1	1	1	1	1	0.262467	1	1.23457	1	1	1	1	0.262467	1	1.23457	1	1
FIFTH	Eggerthellaceae	381	81	1	1	0.262467	1	1.23457	1	1	0.262467	1	1.23457	1	1	1	1	1	1	0.262467	1	1.23457	1	1	1	1	0.262467	1	1.23457	1	1
SIXTH	Adlercreutzia	91	25	1	1	1.0989	1	4	1	1	1.0989	1	4	1	1	1	1	1	1	1.0989	1	4	1	1	1	1	1.0989	1	4	1	1
SEVENTH	environmental_samples	17	1	0	0	0	0	0	0	0	0	0	0	0	NA	0	NA	0	0	0	0	0	0	0	0	0	0	0	0	0	0
SEVENTH	unclassified_Adlercreutzia	15	14	1	1	6.66667	1	7.14286	1	1	6.66667	1	7.14286	1	1	1	1	1	1	6.66667	1	7.14286	1	1	1	1	6.66667	1	7.14286	1	1
SIXTH	Anaerotardibacter	1	1	0	0	0	0	0	0	0	0	0	0	0	NA	0	NA	0	0	0	0	0	0	0	0	0	0	0	0	0	0
SIXTH	Arabiibacter	2	1	0	0	0	0	0	0	0	0	0	0	0	NA	0	NA	0	0	0	0	0	0	0	0	0	0	0	0	0	0
SIXTH	Berryella	4	2	0	0	0	0	0	0	0	0	0	0	0	NA	0	NA	0	0	0	0	0	0	0	0	0	0	0	0	0	0
SIXTH	Cryptobacterium	3	1	0	0	0	0	0	0	0	0	0	0	0	NA	0	NA	0	0	0	0	0	0	0	0	0	0	0	0	0	0
SIXTH	Curtanaerobium	2	1	0	0	0	0	0	0	0	0	0	0	0	NA	0	NA	0	0	0	0	0	0	0	0	0	0	0	0	0	0
SIXTH	Denitrobacterium	3	1	0	0	0	0	0	0	0	0	0	0	0	NA	0	NA	0	0	0	0	0	0	0	0	0	0	0	0	0	0
SIXTH	Eggerthella	150	15	0	0	0	0	0	0	0	0	0	0	0	NA	0	NA	0	0	0	0	0	0	0	0	0	0	0	0	0	0
SEVENTH	environmental_samples	2	1	0	0	0	0	0	0	0	0	0	0	0	NA	0	NA	0	0	0	0	0	0	0	0	0	0	0	0	0	0
SEVENTH	unclassified_Eggerthella	17	9	0	0	0	0	0	0	0	0	0	0	0	NA	0	NA	0	0	0	0	0	0	0	0	0	0	0	0	0	0
SIXTH	Ellagibacter	10	2	0	0	0	0	0	0	0	0	0	0	0	NA	0	NA	0	0	0	0	0	0	0	0	0	0	0	0	0	0
SEVENTH	environmental_samples	3	1	0	0	0	0	0	0	0	0	0	0	0	NA	0	NA	0	0	0	0	0	0	0	0	0	0	0	0	0	0
SIXTH	Enterorhabdus	1	1	0	0	0	0	0	0	0	0	0	0	0	NA	0	NA	0	0	0	0	0	0	0	0	0	0	0	0	0	0
SEVENTH	unclassified_Enterorhabdus	1	1	0	0	0	0	0	0	0	0	0	0	0	NA	0	NA	0	0	0	0	0	0	0	0	0	0	0	0	0	0
SIXTH	Enteroscipio	3	1	0	0	0	0	0	0	0	0	0	0	0	NA	0	NA	0	0	0	0	0	0	0	0	0	0	0	0	0	0
SIXTH	Gordonibacter	46	10	0	0	0	0	0	0	0	0	0	0	0	NA	0	NA	0	0	0	0	0	0	0	0	0	0	0	0	0	0
SEVENTH	unclassified_Gordonibacter	18	6	0	0	0	0	0	0	0	0	0	0	0	NA	0	NA	0	0	0	0	0	0	0	0	0	0	0	0	0	0
SIXTH	Hugonella	1	1	0	0	0	0	0	0	0	0	0	0	0	NA	0	NA	0	0	0	0	0	0	0	0	0	0	0	0	0	0
SIXTH	Paraeggerthella	4	4	0	0	0	0	0	0	0	0	0	0	0	NA	0	NA	0	0	0	0	0	0	0	0	0	0	0	0	0	0
SEVENTH	unclassified_Paraeggerthella	2	2	0	0	0	0	0	0	0	0	0	0	0	NA	0	NA	0	0	0	0	0	0	0	0	0	0	0	0	0	0
SIXTH	Phoenicibacter	2	1	0	0	0	0	0	0	0	0	0	0	0	NA	0	NA	0	0	0	0	0	0	0	0	0	0	0	0	0	0
SIXTH	Raoultibacter	7	3	0	0	0	0	0	0	0	0	0	0	0	NA	0	NA	0	0	0	0	0	0	0	0	0	0	0	0	0	0
SIXTH	Rubneribacter	1	1	0	0	0	0	0	0	0	0	0	0	0	NA	0	NA	0	0	0	0	0	0	0	0	0	0	0	0	0	0
SIXTH	Slackia	47	9	0	0	0	0	0	0	0	0	0	0	0	NA	0	NA	0	0	0	0	0	0	0	0	0	0	0	0	0	0
SEVENTH	environmental_samples	11	1	0	0	0	0	0	0	0	0	0	0	0	NA	0	NA	0	0	0	0	0	0	0	0	0	0	0	0	0	0
SEVENTH	unclassified_Slackia	5	2	0	0	0	0	0	0	0	0	0	0	0	NA	0	NA	0	0	0	0	0	0	0	0	0	0	0	0	0	0
SIXTH	Xiamenia	3	1	0	0	0	0	0	0	0	0	0	0	0	NA	0	NA	0	0	0	0	0	0	0	0	0	0	0	0	0	0
THIRD	Nitriliruptoria	17	12	1	1	5.88235	1	8.33333	1	1	5.88235	1	8.33333	1	1	1	1	1	1	5.88235	1	8.33333	1	1	1	1	5.88235	1	8.33333	1	1
FORTH	Egibacterales	1	1	0	0	0	0	0	0	0	0	0	0	0	NA	0	NA	0	0	0	0	0	0	0	0	0	0	0	0	0	0
FIFTH	Egibacteraceae	1	1	0	0	0	0	0	0	0	0	0	0	0	NA	0	NA	0	0	0	0	0	0	0	0	0	0	0	0	0	0
SIXTH	Egibacter	1	1	0	0	0	0	0	0	0	0	0	0	0	NA	0	NA	0	0	0	0	0	0	0	0	0	0	0	0	0	0
FORTH	Egicoccales	4	3	0	0	0	0	0	0	0	0	0	0	0	NA	0	NA	0	0	0	0	0	0	0	0	0	0	0	0	0	0
FIFTH	Egicoccaceae	4	3	0	0	0	0	0	0	0	0	0	0	0	NA	0	NA	0	0	0	0	0	0	0	0	0	0	0	0	0	0
SIXTH	Egicoccus	4	3	0	0	0	0	0	0	0	0	0	0	0	NA	0	NA	0	0	0	0	0	0	0	0	0	0	0	0	0	0
SEVENTH	unclassified_Egicoccus	2	2	0	0	0	0	0	0	0	0	0	0	0	NA	0	NA	0	0	0	0	0	0	0	0	0	0	0	0	0	0
FORTH	Euzebyales	7	4	1	1	14.2857	1	25	1	1	14.2857	1	25	1	1	1	1	1	1	14.2857	1	25	1	1	1	1	14.2857	1	25	1	1
FIFTH	Euzebyaceae	7	4	1	1	14.2857	1	25	1	1	14.2857	1	25	1	1	1	1	1	1	14.2857	1	25	1	1	1	1	14.2857	1	25	1	1
SIXTH	Euzebya	7	4	1	1	14.2857	1	25	1	1	14.2857	1	25	1	1	1	1	1	1	14.2857	1	25	1	1	1	1	14.2857	1	25	1	1
SEVENTH	unclassified_Euzebya	2	1	0	0	0	0	0	0	0	0	0	0	0	NA	0	NA	0	0	0	0	0	0	0	0	0	0	0	0	0	0
FORTH	Nitriliruptorales	2	2	0	0	0	0	0	0	0	0	0	0	0	NA	0	NA	0	0	0	0	0	0	0	0	0	0	0	0	0	0
FIFTH	Nitriliruptoraceae	2	2	0	0	0	0	0	0	0	0	0	0	0	NA	0	NA	0	0	0	0	0	0	0	0	0	0	0	0	0	0
SIXTH	Nitriliruptor	2	2	0	0	0	0	0	0	0	0	0	0	0	NA	0	NA	0	0	0	0	0	0	0	0	0	0	0	0	0	0
SEVENTH	unclassified_Nitriliruptor	1	1	0	0	0	0	0	0	0	0	0	0	0	NA	0	NA	0	0	0	0	0	0	0	0	0	0	0	0	0	0
FORTH	Salsipaludibacterales	1	1	0	0	0	0	0	0	0	0	0	0	0	NA	0	NA	0	0	0	0	0	0	0	0	0	0	0	0	0	0
FIFTH	Salsipaludibacteraceae	1	1	0	0	0	0	0	0	0	0	0	0	0	NA	0	NA	0	0	0	0	0	0	0	0	0	0	0	0	0	0
SIXTH	Salsipaludibacter	1	1	0	0	0	0	0	0	0	0	0	0	0	NA	0	NA	0	0	0	0	0	0	0	0	0	0	0	0	0	0
FORTH	Stomatohabitantales	2	1	0	0	0	0	0	0	0	0	0	0	0	NA	0	NA	0	0	0	0	0	0	0	0	0	0	0	0	0	0
FIFTH	Stomatohabitantaceae	2	1	0	0	0	0	0	0	0	0	0	0	0	NA	0	NA	0	0	0	0	0	0	0	0	0	0	0	0	0	0
SIXTH	Stomatohabitans	2	1	0	0	0	0	0	0	0	0	0	0	0	NA	0	NA	0	0	0	0	0	0	0	0	0	0	0	0	0	0
THIRD	Rubrobacteria	13	9	0	0	0	0	0	0	0	0	0	0	0	NA	0	NA	0	0	0	0	0	0	0	0	0	0	0	0	0	0
FORTH	Rubrobacterales	13	9	0	0	0	0	0	0	0	0	0	0	0	NA	0	NA	0	0	0	0	0	0	0	0	0	0	0	0	0	0
FIFTH	Rubrobacteraceae	13	9	0	0	0	0	0	0	0	0	0	0	0	NA	0	NA	0	0	0	0	0	0	0	0	0	0	0	0	0	0
SIXTH	Rubrobacter	13	9	0	0	0	0	0	0	0	0	0	0	0	NA	0	NA	0	0	0	0	0	0	0	0	0	0	0	0	0	0
THIRD	Thermoleophilia	48	39	6	6	12.5	6	15.3846	6	6	12.5	6	15.3846	5	0.833333	6	1	6	6	12.5	6	15.3846	5	6	6	6	12.5	6	15.3846	5	6
FORTH	Gaiellales	6	2	0	0	0	0	0	0	0	0	0	0	0	NA	0	NA	0	0	0	0	0	0	0	0	0	0	0	0	0	0
FIFTH	Gaiellaceae	6	2	0	0	0	0	0	0	0	0	0	0	0	NA	0	NA	0	0	0	0	0	0	0	0	0	0	0	0	0	0
SIXTH	Gaiella	6	2	0	0	0	0	0	0	0	0	0	0	0	NA	0	NA	0	0	0	0	0	0	0	0	0	0	0	0	0	0
SEVENTH	unclassified_Gaiella	5	1	0	0	0	0	0	0	0	0	0	0	0	NA	0	NA	0	0	0	0	0	0	0	0	0	0	0	0	0	0
FORTH	Miltoncostaeales	2	2	0	0	0	0	0	0	0	0	0	0	0	NA	0	NA	0	0	0	0	0	0	0	0	0	0	0	0	0	0
FIFTH	Miltoncostaeaceae	2	2	0	0	0	0	0	0	0	0	0	0	0	NA	0	NA	0	0	0	0	0	0	0	0	0	0	0	0	0	0
SIXTH	Miltoncostaea	2	2	0	0	0	0	0	0	0	0	0	0	0	NA	0	NA	0	0	0	0	0	0	0	0	0	0	0	0	0	0
FORTH	Solirubrobacterales	38	34	6	6	15.7895	6	17.6471	6	6	15.7895	6	17.6471	5	0.833333	6	1	6	6	15.7895	6	17.6471	5	6	6	6	15.7895	6	17.6471	5	6
FIFTH	Baekduiaceae	6	4	0	0	0	0	0	0	0	0	0	0	0	NA	0	NA	0	0	0	0	0	0	0	0	0	0	0	0	0	0
SIXTH	Baekduia	5	3	0	0	0	0	0	0	0	0	0	0	0	NA	0	NA	0	0	0	0	0	0	0	0	0	0	0	0	0	0
SEVENTH	unclassified_Baekduia	3	1	0	0	0	0	0	0	0	0	0	0	0	NA	0	NA	0	0	0	0	0	0	0	0	0	0	0	0	0	0
SIXTH	Svornostia	1	1	0	0	0	0	0	0	0	0	0	0	0	NA	0	NA	0	0	0	0	0	0	0	0	0	0	0	0	0	0
FIFTH	Capillimicrobiaceae	1	1	0	0	0	0	0	0	0	0	0	0	0	NA	0	NA	0	0	0	0	0	0	0	0	0	0	0	0	0	0
SIXTH	Capillimicrobium	1	1	0	0	0	0	0	0	0	0	0	0	0	NA	0	NA	0	0	0	0	0	0	0	0	0	0	0	0	0	0
FIFTH	Conexibacteraceae	13	11	0	0	0	0	0	0	0	0	0	0	0	NA	0	NA	0	0	0	0	0	0	0	0	0	0	0	0	0	0
SIXTH	Conexibacter	13	11	0	0	0	0	0	0	0	0	0	0	0	NA	0	NA	0	0	0	0	0	0	0	0	0	0	0	0	0	0
SEVENTH	unclassified_Conexibacter	8	8	0	0	0	0	0	0	0	0	0	0	0	NA	0	NA	0	0	0	0	0	0	0	0	0	0	0	0	0	0
FIFTH	Paraconexibacteraceae	4	4	0	0	0	0	0	0	0	0	0	0	0	NA	0	NA	0	0	0	0	0	0	0	0	0	0	0	0	0	0
SIXTH	Paraconexibacter	4	4	0	0	0	0	0	0	0	0	0	0	0	NA	0	NA	0	0	0	0	0	0	0	0	0	0	0	0	0	0
SEVENTH	unclassified_Paraconexibacter	2	2	0	0	0	0	0	0	0	0	0	0	0	NA	0	NA	0	0	0	0	0	0	0	0	0	0	0	0	0	0
FIFTH	Patulibacteraceae	8	8	4	4	50	4	50	4	4	50	4	50	3	0.75	4	1	4	4	50	4	50	3	4	4	4	50	4	50	3	4
SIXTH	Patulibacter	8	8	4	4	50	4	50	4	4	50	4	50	3	0.75	4	1	4	4	50	4	50	3	4	4	4	50	4	50	3	4
SEVENTH	unclassified_Patulibacter	3	3	2	2	66.6667	2	66.6667	2	2	66.6667	2	66.6667	2	1	2	1	2	2	66.6667	2	66.6667	2	2	2	2	66.6667	2	66.6667	2	2
FIFTH	Solirubrobacteraceae	6	6	2	2	33.3333	2	33.3333	2	2	33.3333	2	33.3333	2	1	2	1	2	2	33.3333	2	33.3333	2	2	2	2	33.3333	2	33.3333	2	2
SIXTH	Solirubrobacter	6	6	2	2	33.3333	2	33.3333	2	2	33.3333	2	33.3333	2	1	2	1	2	2	33.3333	2	33.3333	2	2	2	2	33.3333	2	33.3333	2	2
FORTH	Thermoleophilales	2	1	0	0	0	0	0	0	0	0	0	0	0	NA	0	NA	0	0	0	0	0	0	0	0	0	0	0	0	0	0
FIFTH	Thermoleophilaceae	2	1	0	0	0	0	0	0	0	0	0	0	0	NA	0	NA	0	0	0	0	0	0	0	0	0	0	0	0	0	0
SIXTH	Thermoleophilum	2	1	0	0	0	0	0	0	0	0	0	0	0	NA	0	NA	0	0	0	0	0	0	0	0	0	0	0	0	0	0
SECOND	Aquificota	55	40	0	0	0	0	0	0	0	0	0	0	0	NA	0	NA	0	0	0	0	0	0	0	0	0	0	0	0	0	0
THIRD	Aquificia	55	40	0	0	0	0	0	0	0	0	0	0	0	NA	0	NA	0	0	0	0	0	0	0	0	0	0	0	0	0	0
FORTH	Aquificales	44	30	0	0	0	0	0	0	0	0	0	0	0	NA	0	NA	0	0	0	0	0	0	0	0	0	0	0	0	0	0
FIFTH	Aquificaceae	23	17	0	0	0	0	0	0	0	0	0	0	0	NA	0	NA	0	0	0	0	0	0	0	0	0	0	0	0	0	0
SIXTH	Aquifex	1	1	0	0	0	0	0	0	0	0	0	0	0	NA	0	NA	0	0	0	0	0	0	0	0	0	0	0	0	0	0
SIXTH	Hydrogenivirga	2	2	0	0	0	0	0	0	0	0	0	0	0	NA	0	NA	0	0	0	0	0	0	0	0	0	0	0	0	0	0
SEVENTH	unclassified_Hydrogenivirga	1	1	0	0	0	0	0	0	0	0	0	0	0	NA	0	NA	0	0	0	0	0	0	0	0	0	0	0	0	0	0
SIXTH	Hydrogenobacter	8	4	0	0	0	0	0	0	0	0	0	0	0	NA	0	NA	0	0	0	0	0	0	0	0	0	0	0	0	0	0
SEVENTH	unclassified_Hydrogenobacter	2	2	0	0	0	0	0	0	0	0	0	0	0	NA	0	NA	0	0	0	0	0	0	0	0	0	0	0	0	0	0
SIXTH	Hydrogenobaculum	5	5	0	0	0	0	0	0	0	0	0	0	0	NA	0	NA	0	0	0	0	0	0	0	0	0	0	0	0	0	0
SEVENTH	unclassified_Hydrogenobaculum	5	5	0	0	0	0	0	0	0	0	0	0	0	NA	0	NA	0	0	0	0	0	0	0	0	0	0	0	0	0	0
SIXTH	Thermocrinis	7	5	0	0	0	0	0	0	0	0	0	0	0	NA	0	NA	0	0	0	0	0	0	0	0	0	0	0	0	0	0
SEVENTH	unclassified_Thermocrinis	3	1	0	0	0	0	0	0	0	0	0	0	0	NA	0	NA	0	0	0	0	0	0	0	0	0	0	0	0	0	0
FIFTH	Hydrogenothermaceae	21	13	0	0	0	0	0	0	0	0	0	0	0	NA	0	NA	0	0	0	0	0	0	0	0	0	0	0	0	0	0
SIXTH	Hydrogenothermus	1	1	0	0	0	0	0	0	0	0	0	0	0	NA	0	NA	0	0	0	0	0	0	0	0	0	0	0	0	0	0
SIXTH	Persephonella	11	6	0	0	0	0	0	0	0	0	0	0	0	NA	0	NA	0	0	0	0	0	0	0	0	0	0	0	0	0	0
SEVENTH	unclassified_Persephonella	8	3	0	0	0	0	0	0	0	0	0	0	0	NA	0	NA	0	0	0	0	0	0	0	0	0	0	0	0	0	0
SIXTH	Sulfurihydrogenibium	8	5	0	0	0	0	0	0	0	0	0	0	0	NA	0	NA	0	0	0	0	0	0	0	0	0	0	0	0	0	0
SEVENTH	unclassified_Sulfurihydrogenibium	4	2	0	0	0	0	0	0	0	0	0	0	0	NA	0	NA	0	0	0	0	0	0	0	0	0	0	0	0	0	0
SIXTH	Venenivibrio	1	1	0	0	0	0	0	0	0	0	0	0	0	NA	0	NA	0	0	0	0	0	0	0	0	0	0	0	0	0	0
FORTH	Desulfurobacteriales	11	10	0	0	0	0	0	0	0	0	0	0	0	NA	0	NA	0	0	0	0	0	0	0	0	0	0	0	0	0	0
FIFTH	Desulfurobacteriaceae	11	10	0	0	0	0	0	0	0	0	0	0	0	NA	0	NA	0	0	0	0	0	0	0	0	0	0	0	0	0	0
SIXTH	Balnearium	1	1	0	0	0	0	0	0	0	0	0	0	0	NA	0	NA	0	0	0	0	0	0	0	0	0	0	0	0	0	0
SIXTH	Desulfurobacterium	7	6	0	0	0	0	0	0	0	0	0	0	0	NA	0	NA	0	0	0	0	0	0	0	0	0	0	0	0	0	0
SEVENTH	unclassified_Desulfurobacterium	2	2	0	0	0	0	0	0	0	0	0	0	0	NA	0	NA	0	0	0	0	0	0	0	0	0	0	0	0	0	0
SIXTH	Phorcysia	1	1	0	0	0	0	0	0	0	0	0	0	0	NA	0	NA	0	0	0	0	0	0	0	0	0	0	0	0	0	0
SIXTH	Thermovibrio	2	2	0	0	0	0	0	0	0	0	0	0	0	NA	0	NA	0	0	0	0	0	0	0	0	0	0	0	0	0	0
SECOND	Armatimonadota	12	7	4	4	33.3333	3	42.8571	4	4	33.3333	3	42.8571	3	0.75	3	0.75	4	4	33.3333	3	42.8571	3	3	3	3	25	2	28.5714	2	2
THIRD	Armatimonadia	5	4	3	3	60	2	50	3	3	60	2	50	2	0.666667	2	0.666667	3	3	60	2	50	2	2	3	3	60	2	50	2	2
FORTH	Armatimonadales	2	2	0	0	0	0	0	0	0	0	0	0	0	NA	0	NA	0	0	0	0	0	0	0	0	0	0	0	0	0	0
FIFTH	Armatimonadaceae	2	2	0	0	0	0	0	0	0	0	0	0	0	NA	0	NA	0	0	0	0	0	0	0	0	0	0	0	0	0	0
SIXTH	Armatimonas	2	2	0	0	0	0	0	0	0	0	0	0	0	NA	0	NA	0	0	0	0	0	0	0	0	0	0	0	0	0	0
SEVENTH	unclassified_Armatimonas	1	1	0	0	0	0	0	0	0	0	0	0	0	NA	0	NA	0	0	0	0	0	0	0	0	0	0	0	0	0	0
FORTH	Capsulimonadales	3	2	3	3	100	2	100	3	3	100	2	100	2	0.666667	2	0.666667	3	3	100	2	100	2	2	3	3	100	2	100	2	2
FIFTH	Capsulimonadaceae	3	2	3	3	100	2	100	3	3	100	2	100	2	0.666667	2	0.666667	3	3	100	2	100	2	2	3	3	100	2	100	2	2
SIXTH	Capsulimonas	3	2	3	3	100	2	100	3	3	100	2	100	2	0.666667	2	0.666667	3	3	100	2	100	2	2	3	3	100	2	100	2	2
SEVENTH	unclassified_Capsulimonas	2	1	2	2	100	1	100	2	2	100	1	100	1	0.5	1	0.5	2	2	100	1	100	1	1	2	2	100	1	100	1	1
THIRD	Chthonomonadia	6	2	0	0	0	0	0	0	0	0	0	0	0	NA	0	NA	0	0	0	0	0	0	0	0	0	0	0	0	0	0
FORTH	Chthonomonadales	6	2	0	0	0	0	0	0	0	0	0	0	0	NA	0	NA	0	0	0	0	0	0	0	0	0	0	0	0	0	0
FIFTH	Chthonomonadaceae	6	2	0	0	0	0	0	0	0	0	0	0	0	NA	0	NA	0	0	0	0	0	0	0	0	0	0	0	0	0	0
SIXTH	Chthonomonas	6	2	0	0	0	0	0	0	0	0	0	0	0	NA	0	NA	0	0	0	0	0	0	0	0	0	0	0	0	0	0
SEVENTH	unclassified_Chthonomonas	2	1	0	0	0	0	0	0	0	0	0	0	0	NA	0	NA	0	0	0	0	0	0	0	0	0	0	0	0	0	0
THIRD	Fimbriimonadia	1	1	1	1	100	1	100	1	1	100	1	100	1	1	1	1	1	1	100	1	100	1	1	0	0	0	0	0	0	0
FORTH	Fimbriimonadales	1	1	1	1	100	1	100	1	1	100	1	100	1	1	1	1	1	1	100	1	100	1	1	0	0	0	0	0	0	0
FIFTH	Fimbriimonadaceae	1	1	1	1	100	1	100	1	1	100	1	100	1	1	1	1	1	1	100	1	100	1	1	0	0	0	0	0	0	0
SIXTH	Fimbriimonas	1	1	1	1	100	1	100	1	1	100	1	100	1	1	1	1	1	1	100	1	100	1	1	0	0	0	0	0	0	0
SECOND	Atribacterota	4	3	0	0	0	0	0	0	0	0	0	0	0	NA	0	NA	0	0	0	0	0	0	0	0	0	0	0	0	0	0
THIRD	Atribacteria	4	3	0	0	0	0	0	0	0	0	0	0	0	NA	0	NA	0	0	0	0	0	0	0	0	0	0	0	0	0	0
FORTH	Atribacterales	4	3	0	0	0	0	0	0	0	0	0	0	0	NA	0	NA	0	0	0	0	0	0	0	0	0	0	0	0	0	0
FIFTH	Atribacteraceae	3	2	0	0	0	0	0	0	0	0	0	0	0	NA	0	NA	0	0	0	0	0	0	0	0	0	0	0	0	0	0
SIXTH	Atribacter	3	2	0	0	0	0	0	0	0	0	0	0	0	NA	0	NA	0	0	0	0	0	0	0	0	0	0	0	0	0	0
SEVENTH	unclassified_Atribacter	2	1	0	0	0	0	0	0	0	0	0	0	0	NA	0	NA	0	0	0	0	0	0	0	0	0	0	0	0	0	0
FIFTH	Thermatribacteraceae	1	1	0	0	0	0	0	0	0	0	0	0	0	NA	0	NA	0	0	0	0	0	0	0	0	0	0	0	0	0	0
SIXTH	Thermatribacter	1	1	0	0	0	0	0	0	0	0	0	0	0	NA	0	NA	0	0	0	0	0	0	0	0	0	0	0	0	0	0
SECOND	Bacillota	102102	8980	33444	27502	26.9358	1875	20.8797	32646	26932	26.3775	1853	20.6347	247	0.00756601	265	0.00811738	32324	26699	26.1493	1847	20.5679	230	247	31819	26256	25.7155	1800	20.0445	201	218
THIRD	Bacilli	85518	6368	33047	27120	31.7126	1782	27.9837	32268	26562	31.0601	1763	27.6853	228	0.00706582	242	0.00749969	31947	26330	30.7888	1758	27.6068	211	224	31448	25893	30.2778	1712	26.8844	185	198
FORTH	Bacillales	44999	4624	32833	26910	59.8013	1748	37.8028	32066	26363	58.5857	1733	37.4784	218	0.00679848	231	0.00720389	31755	26141	58.0924	1731	37.4351	202	214	31265	25712	57.139	1687	36.4836	179	191
FIFTH	Abyssicoccaceae	2	1	0	0	0	0	0	0	0	0	0	0	0	NA	0	NA	0	0	0	0	0	0	0	0	0	0	0	0	0	0
SIXTH	Abyssicoccus	2	1	0	0	0	0	0	0	0	0	0	0	0	NA	0	NA	0	0	0	0	0	0	0	0	0	0	0	0	0	0
FIFTH	Alicyclobacillaceae	81	48	1	1	1.23457	1	2.08333	1	1	1.23457	1	2.08333	1	1	1	1	1	1	1.23457	1	2.08333	1	1	1	1	1.23457	1	2.08333	1	1
SIXTH	Alicyclobacillus	55	30	1	1	1.81818	1	3.33333	1	1	1.81818	1	3.33333	1	1	1	1	1	1	1.81818	1	3.33333	1	1	1	1	1.81818	1	3.33333	1	1
SEVENTH	unclassified_Alicyclobacillus	5	5	0	0	0	0	0	0	0	0	0	0	0	NA	0	NA	0	0	0	0	0	0	0	0	0	0	0	0	0	0
SIXTH	Collibacillus	1	1	0	0	0	0	0	0	0	0	0	0	0	NA	0	NA	0	0	0	0	0	0	0	0	0	0	0	0	0	0
SIXTH	Effusibacillus	4	3	0	0	0	0	0	0	0	0	0	0	0	NA	0	NA	0	0	0	0	0	0	0	0	0	0	0	0	0	0
SIXTH	Ferroacidibacillus	4	1	0	0	0	0	0	0	0	0	0	0	0	NA	0	NA	0	0	0	0	0	0	0	0	0	0	0	0	0	0
SIXTH	Fodinisporobacter	1	1	0	0	0	0	0	0	0	0	0	0	0	NA	0	NA	0	0	0	0	0	0	0	0	0	0	0	0	0	0
SIXTH	Kyrpidia	7	3	0	0	0	0	0	0	0	0	0	0	0	NA	0	NA	0	0	0	0	0	0	0	0	0	0	0	0	0	0
SEVENTH	unclassified_Kyrpidia	1	1	0	0	0	0	0	0	0	0	0	0	0	NA	0	NA	0	0	0	0	0	0	0	0	0	0	0	0	0	0
SIXTH	Sulfoacidibacillus	2	2	0	0	0	0	0	0	0	0	0	0	0	NA	0	NA	0	0	0	0	0	0	0	0	0	0	0	0	0	0
SIXTH	Tumebacillus	7	7	0	0	0	0	0	0	0	0	0	0	0	NA	0	NA	0	0	0	0	0	0	0	0	0	0	0	0	0	0
SEVENTH	unclassified_Tumebacillus	1	1	0	0	0	0	0	0	0	0	0	0	0	NA	0	NA	0	0	0	0	0	0	0	0	0	0	0	0	0	0
FIFTH	Bacillaceae	12264	2420	13951	8917	72.7087	1233	50.9504	13809	8880	72.407	1223	50.5372	138	0.00999348	150	0.0108625	13784	8877	72.3826	1223	50.5372	128	141	13692	8803	71.7792	1194	49.3388	115	128
SIXTH	Aciduricibacillus	1	1	0	0	0	0	0	0	0	0	0	0	0	NA	0	NA	0	0	0	0	0	0	0	0	0	0	0	0	0	0
SIXTH	Aeribacillus	24	13	0	0	0	0	0	0	0	0	0	0	0	NA	0	NA	0	0	0	0	0	0	0	0	0	0	0	0	0	0
SEVENTH	unclassified_Aeribacillus	11	11	0	0	0	0	0	0	0	0	0	0	0	NA	0	NA	0	0	0	0	0	0	0	0	0	0	0	0	0	0
SIXTH	Aliibacillus	1	1	0	0	0	0	0	0	0	0	0	0	0	NA	0	NA	0	0	0	0	0	0	0	0	0	0	0	0	0	0
SIXTH	Alkalibacillus	9	7	0	0	0	0	0	0	0	0	0	0	0	NA	0	NA	0	0	0	0	0	0	0	0	0	0	0	0	0	0
SIXTH	Alkalicoccobacillus	8	4	5	5	62.5	3	75	5	5	62.5	3	75	3	0.6	3	0.6	5	5	62.5	3	75	3	3	5	5	62.5	3	75	3	3
SIXTH	Alkalicoccus	6	6	0	0	0	0	0	0	0	0	0	0	0	NA	0	NA	0	0	0	0	0	0	0	0	0	0	0	0	0	0
SIXTH	Alkalihalobacillus	19	14	1	1	5.26316	1	7.14286	1	1	5.26316	1	7.14286	1	1	1	1	1	1	5.26316	1	7.14286	1	1	1	1	5.26316	1	7.14286	1	1
SEVENTH	unclassified_Alkalihalobacillus	7	7	1	1	14.2857	1	14.2857	1	1	14.2857	1	14.2857	1	1	1	1	1	1	14.2857	1	14.2857	1	1	1	1	14.2857	1	14.2857	1	1
SIXTH	Alkalihalobacterium	4	4	0	0	0	0	0	0	0	0	0	0	0	NA	0	NA	0	0	0	0	0	0	0	0	0	0	0	0	0	0
SIXTH	Alkalihalophilus	11	4	0	0	0	0	0	0	0	0	0	0	0	NA	0	NA	0	0	0	0	0	0	0	0	0	0	0	0	0	0
SEVENTH	unclassified_Alkalihalophilus	1	1	0	0	0	0	0	0	0	0	0	0	0	NA	0	NA	0	0	0	0	0	0	0	0	0	0	0	0	0	0
SIXTH	Allobacillus	7	5	3	3	42.8571	3	60	3	3	42.8571	3	60	2	0.666667	2	0.666667	3	3	42.8571	3	60	2	2	3	3	42.8571	3	60	2	2
SEVENTH	environmental_samples	1	1	0	0	0	0	0	0	0	0	0	0	0	NA	0	NA	0	0	0	0	0	0	0	0	0	0	0	0	0	0
SEVENTH	unclassified_Allobacillus	1	1	0	0	0	0	0	0	0	0	0	0	0	NA	0	NA	0	0	0	0	0	0	0	0	0	0	0	0	0	0
SIXTH	Alteribacillus	7	6	1	1	14.2857	1	16.6667	1	1	14.2857	1	16.6667	1	1	1	1	1	1	14.2857	1	16.6667	1	1	1	1	14.2857	1	16.6667	1	1
SEVENTH	unclassified_Alteribacillus	3	3	1	1	33.3333	1	33.3333	1	1	33.3333	1	33.3333	1	1	1	1	1	1	33.3333	1	33.3333	1	1	1	1	33.3333	1	33.3333	1	1
SIXTH	Alteribacter	6	6	0	0	0	0	0	0	0	0	0	0	0	NA	0	NA	0	0	0	0	0	0	0	0	0	0	0	0	0	0
SIXTH	Amphibacillus	7	7	2	2	28.5714	2	28.5714	2	2	28.5714	2	28.5714	1	0.5	1	0.5	2	2	28.5714	2	28.5714	1	1	2	2	28.5714	2	28.5714	1	1
SEVENTH	unclassified_Amphibacillus	1	1	0	0	0	0	0	0	0	0	0	0	0	NA	0	NA	0	0	0	0	0	0	0	0	0	0	0	0	0	0
SIXTH	Anaerobacillus	7	7	0	0	0	0	0	0	0	0	0	0	0	NA	0	NA	0	0	0	0	0	0	0	0	0	0	0	0	0	0
SEVENTH	unclassified_Anaerobacillus	2	2	0	0	0	0	0	0	0	0	0	0	0	NA	0	NA	0	0	0	0	0	0	0	0	0	0	0	0	0	0
SIXTH	Anoxybacillus	91	41	0	0	0	0	0	0	0	0	0	0	0	NA	0	NA	0	0	0	0	0	0	0	0	0	0	0	0	0	0
SEVENTH	environmental_samples	1	1	0	0	0	0	0	0	0	0	0	0	0	NA	0	NA	0	0	0	0	0	0	0	0	0	0	0	0	0	0
SEVENTH	unclassified_Anoxybacillus	24	23	0	0	0	0	0	0	0	0	0	0	0	NA	0	NA	0	0	0	0	0	0	0	0	0	0	0	0	0	0
SIXTH	Aquibacillus	9	8	0	0	0	0	0	0	0	0	0	0	0	NA	0	NA	0	0	0	0	0	0	0	0	0	0	0	0	0	0
SIXTH	Aquisalibacillus	1	1	0	0	0	0	0	0	0	0	0	0	0	NA	0	NA	0	0	0	0	0	0	0	0	0	0	0	0	0	0
SIXTH	Aureibacillus	1	1	0	0	0	0	0	0	0	0	0	0	0	NA	0	NA	0	0	0	0	0	0	0	0	0	0	0	0	0	0
SIXTH	Bacillus	9278	1338	12654	7677	82.7441	918	68.6099	12520	7645	82.3992	909	67.9372	59	0.00471246	57	0.00455272	12498	7644	82.3884	909	67.9372	51	50	12469	7629	82.2268	899	67.1898	44	43
SEVENTH	Bacillus_altitudinis_complex	227	2	1	1	0.440529	1	50	1	1	0.440529	1	50	1	1	1	1	1	1	0.440529	1	50	1	1	1	1	0.440529	1	50	1	1
SEVENTH	environmental_samples	2	1	1	1	50	1	100	1	1	50	1	100	1	1	1	1	1	1	50	1	100	1	1	1	1	50	1	100	1	1
SEVENTH	unclassified_	0	0	0	0	0	0	0	0	0	NA	0	NA	0	0	0	0	0	0	0	0	0	0
SEVENTH	unclassified_Bacillus_in_firmicutes	954	935	959	596	62.4738	589	62.9947	937	587	61.5304	580	62.0321	24	0.0256137	25	0.0266809	937	587	61.5304	580	62.0321	24	25	927	578	60.587	571	61.0695	23	24
SIXTH	Caldalkalibacillus	6	4	0	0	0	0	0	0	0	0	0	0	0	NA	0	NA	0	0	0	0	0	0	0	0	0	0	0	0	0	0
SIXTH	Caldibacillus	21	4	0	0	0	0	0	0	0	0	0	0	0	NA	0	NA	0	0	0	0	0	0	0	0	0	0	0	0	0	0
SEVENTH	unclassified_Caldibacillus	2	2	0	0	0	0	0	0	0	0	0	0	0	NA	0	NA	0	0	0	0	0	0	0	0	0	0	0	0	0	0
SIXTH	Caldifermentibacillus	23	1	0	0	0	0	0	0	0	0	0	0	0	NA	0	NA	0	0	0	0	0	0	0	0	0	0	0	0	0	0
SIXTH	Calditerricola	2	1	0	0	0	0	0	0	0	0	0	0	0	NA	0	NA	0	0	0	0	0	0	0	0	0	0	0	0	0	0
SIXTH	Calidifontibacillus	3	2	0	0	0	0	0	0	0	0	0	0	0	NA	0	NA	0	0	0	0	0	0	0	0	0	0	0	0	0	0
SIXTH	Cerasibacillus	4	3	0	0	0	0	0	0	0	0	0	0	0	NA	0	NA	0	0	0	0	0	0	0	0	0	0	0	0	0	0
SEVENTH	unclassified_Cerasibacillus	1	1	0	0	0	0	0	0	0	0	0	0	0	NA	0	NA	0	0	0	0	0	0	0	0	0	0	0	0	0	0
SIXTH	Compostibacillus	1	1	0	0	0	0	0	0	0	0	0	0	0	NA	0	NA	0	0	0	0	0	0	0	0	0	0	0	0	0	0
SIXTH	Cytobacillus	127	38	71	71	55.9055	23	60.5263	70	70	55.1181	23	60.5263	5	0.0714286	5	0.0714286	70	70	55.1181	23	60.5263	5	5	68	68	53.5433	21	55.2632	5	5
SEVENTH	unclassified_Cytobacillus	23	21	16	16	69.5652	15	71.4286	16	16	69.5652	15	71.4286	2	0.125	2	0.125	16	16	69.5652	15	71.4286	2	2	15	15	65.2174	14	66.6667	2	2
SIXTH	Desertibacillus	1	1	0	0	0	0	0	0	0	0	0	0	0	NA	0	NA	0	0	0	0	0	0	0	0	0	0	0	0	0	0
SIXTH	Domibacillus	19	14	0	0	0	0	0	0	0	0	0	0	0	NA	0	NA	0	0	0	0	0	0	0	0	0	0	0	0	0	0
SEVENTH	unclassified_Domibacillus	5	5	0	0	0	0	0	0	0	0	0	0	0	NA	0	NA	0	0	0	0	0	0	0	0	0	0	0	0	0	0
SIXTH	Ectobacillus	7	5	1	1	14.2857	1	20	1	1	14.2857	1	20	1	1	1	1	1	1	14.2857	1	20	1	1	1	1	14.2857	1	20	1	1
SEVENTH	unclassified_Ectobacillus	1	1	0	0	0	0	0	0	0	0	0	0	0	NA	0	NA	0	0	0	0	0	0	0	0	0	0	0	0	0	0
SIXTH	Edaphobacillus	1	1	0	0	0	0	0	0	0	0	0	0	0	NA	0	NA	0	0	0	0	0	0	0	0	0	0	0	0	0	0
SIXTH	Evansella	9	8	1	1	11.1111	1	12.5	1	1	11.1111	1	12.5	1	1	1	1	1	1	11.1111	1	12.5	1	1	1	1	11.1111	1	12.5	1	1
SEVENTH	unclassified_Evansella	3	3	0	0	0	0	0	0	0	0	0	0	0	NA	0	NA	0	0	0	0	0	0	0	0	0	0	0	0	0	0
SIXTH	Falsibacillus	2	2	0	0	0	0	0	0	0	0	0	0	0	NA	0	NA	0	0	0	0	0	0	0	0	0	0	0	0	0	0
SIXTH	Fervidibacillus	2	2	0	0	0	0	0	0	0	0	0	0	0	NA	0	NA	0	0	0	0	0	0	0	0	0	0	0	0	0	0
SIXTH	Fictibacillus	41	26	21	21	51.2195	15	57.6923	21	21	51.2195	15	57.6923	4	0.190476	6	0.285714	21	21	51.2195	15	57.6923	4	6	21	21	51.2195	15	57.6923	4	6
SEVENTH	unclassified_Fictibacillus	12	12	8	8	66.6667	8	66.6667	8	8	66.6667	8	66.6667	2	0.25	3	0.375	8	8	66.6667	8	66.6667	2	3	8	8	66.6667	8	66.6667	2	3
SIXTH	Filobacillus	1	1	0	0	0	0	0	0	0	0	0	0	0	NA	0	NA	0	0	0	0	0	0	0	0	0	0	0	0	0	0
SIXTH	Fredinandcohnia	7	4	2	2	28.5714	2	50	2	2	28.5714	2	50	2	1	2	1	2	2	28.5714	2	50	2	2	2	2	28.5714	2	50	2	2
SEVENTH	unclassified_Fredinandcohnia	2	2	2	2	100	2	100	2	2	100	2	100	2	1	2	1	2	2	100	2	100	2	2	2	2	100	2	100	2	2
SIXTH	Geobacillus	153	53	2	2	1.30719	2	3.77358	1	1	0.653595	1	1.88679	1	1	1	1	1	1	0.653595	1	1.88679	1	1	1	1	0.653595	1	1.88679	1	1
SEVENTH	unclassified_Geobacillus	40	38	2	2	5	2	5.26316	1	1	2.5	1	2.63158	1	1	1	1	1	1	2.5	1	2.63158	1	1	1	1	2.5	1	2.63158	1	1
SIXTH	Gottfriedia	17	5	1	1	5.88235	1	20	1	1	5.88235	1	20	1	1	1	1	1	1	5.88235	1	20	1	1	1	1	5.88235	1	20	1	1
SEVENTH	unclassified_Gottfriedia	1	1	0	0	0	0	0	0	0	0	0	0	0	NA	0	NA	0	0	0	0	0	0	0	0	0	0	0	0	0	0
SIXTH	Gracilibacillus	27	22	17	17	62.963	14	63.6364	17	17	62.963	14	63.6364	9	0.529412	10	0.588235	17	17	62.963	14	63.6364	9	10	17	17	62.963	14	63.6364	9	10
SEVENTH	unclassified_Gracilibacillus	3	3	1	1	33.3333	1	33.3333	1	1	33.3333	1	33.3333	1	1	1	1	1	1	33.3333	1	33.3333	1	1	1	1	33.3333	1	33.3333	1	1
SIXTH	Halalkalibacillus	2	2	0	0	0	0	0	0	0	0	0	0	0	NA	0	NA	0	0	0	0	0	0	0	0	0	0	0	0	0	0
SIXTH	Halalkalibacter	21	15	7	7	33.3333	4	26.6667	7	7	33.3333	4	26.6667	3	0.428571	3	0.428571	7	7	33.3333	4	26.6667	3	3	7	7	33.3333	4	26.6667	3	3
SEVENTH	unclassified_Halalkalibacter	2	2	2	2	100	2	100	2	2	100	2	100	1	0.5	1	0.5	2	2	100	2	100	1	1	2	2	100	2	100	1	1
SIXTH	Halalkalibacterium_ex_Joshi_et_al_2022	21	2	3	3	14.2857	2	100	3	3	14.2857	2	100	2	0.666667	2	0.666667	3	3	14.2857	2	100	2	2	3	3	14.2857	2	100	2	2
SIXTH	Halobacillus	54	34	12	12	22.2222	9	26.4706	12	12	22.2222	9	26.4706	5	0.416667	6	0.5	12	12	22.2222	9	26.4706	5	6	12	12	22.2222	9	26.4706	5	6
SEVENTH	unclassified_Halobacillus	12	12	2	2	16.6667	2	16.6667	2	2	16.6667	2	16.6667	2	1	2	1	2	2	16.6667	2	16.6667	2	2	2	2	16.6667	2	16.6667	2	2
SIXTH	Halolactibacillus	8	4	0	0	0	0	0	0	0	0	0	0	0	NA	0	NA	0	0	0	0	0	0	0	0	0	0	0	0	0	0
SEVENTH	unclassified_Halolactibacillus	1	1	0	0	0	0	0	0	0	0	0	0	0	NA	0	NA	0	0	0	0	0	0	0	0	0	0	0	0	0	0
SIXTH	Heyndrickxia	167	23	17	17	10.1796	5	21.7391	17	17	10.1796	5	21.7391	3	0.176471	3	0.176471	17	17	10.1796	5	21.7391	3	3	17	17	10.1796	5	21.7391	3	3
SEVENTH	unclassified_Heyndrickxia	20	11	2	2	10	2	18.1818	2	2	10	2	18.1818	1	0.5	1	0.5	2	2	10	2	18.1818	1	1	2	2	10	2	18.1818	1	1
SIXTH	Lederbergia	16	9	8	8	50	4	44.4444	8	8	50	4	44.4444	4	0.5	4	0.5	8	8	50	4	44.4444	4	4	8	8	50	4	44.4444	4	4
SEVENTH	unclassified_Lederbergia	1	1	1	1	100	1	100	1	1	100	1	100	1	1	1	1	1	1	100	1	100	1	1	1	1	100	1	100	1	1
SIXTH	Lentibacillus	20	18	9	9	45	9	50	9	9	45	9	50	5	0.555556	6	0.666667	9	9	45	9	50	5	6	9	9	45	9	50	5	6
SEVENTH	unclassified_Lentibacillus	7	6	3	3	42.8571	3	50	3	3	42.8571	3	50	3	1	3	1	3	3	42.8571	3	50	3	3	3	3	42.8571	3	50	3	3
SIXTH	Litchfieldia	3	2	0	0	0	0	0	0	0	0	0	0	0	NA	0	NA	0	0	0	0	0	0	0	0	0	0	0	0	0	0
SIXTH	Litoribacterium	1	1	0	0	0	0	0	0	0	0	0	0	0	NA	0	NA	0	0	0	0	0	0	0	0	0	0	0	0	0	0
SIXTH	Lottiidibacillus	1	1	0	0	0	0	0	0	0	0	0	0	0	NA	0	NA	0	0	0	0	0	0	0	0	0	0	0	0	0	0
SIXTH	Lysinibacillus	269	110	6	6	2.23048	5	4.54545	6	6	2.23048	5	4.54545	4	0.666667	4	0.666667	6	6	2.23048	5	4.54545	4	4	5	5	1.85874	4	3.63636	4	4
SEVENTH	environmental_samples	1	1	0	0	0	0	0	0	0	0	0	0	0	NA	0	NA	0	0	0	0	0	0	0	0	0	0	0	0	0	0
SEVENTH	unclassified_Lysinibacillus	83	82	2	2	2.40964	2	2.43902	2	2	2.40964	2	2.43902	2	1	2	1	2	2	2.40964	2	2.43902	2	2	2	2	2.40964	2	2.43902	2	2
SIXTH	Mangrovibacillus	2	2	0	0	0	0	0	0	0	0	0	0	0	NA	0	NA	0	0	0	0	0	0	0	0	0	0	0	0	0	0
SEVENTH	unclassified_Mangrovibacillus	1	1	0	0	0	0	0	0	0	0	0	0	0	NA	0	NA	0	0	0	0	0	0	0	0	0	0	0	0	0	0
SIXTH	Marinococcus	8	5	0	0	0	0	0	0	0	0	0	0	0	NA	0	NA	0	0	0	0	0	0	0	0	0	0	0	0	0	0
SEVENTH	environmental_samples	1	1	0	0	0	0	0	0	0	0	0	0	0	NA	0	NA	0	0	0	0	0	0	0	0	0	0	0	0	0	0
SEVENTH	unclassified_Marinococcus	1	1	0	0	0	0	0	0	0	0	0	0	0	NA	0	NA	0	0	0	0	0	0	0	0	0	0	0	0	0	0
SIXTH	Massilibacterium	2	1	2	2	100	1	100	2	2	100	1	100	1	0.5	1	0.5	2	2	100	1	100	1	1	2	2	100	1	100	1	1
SIXTH	Melghiribacillus	1	1	0	0	0	0	0	0	0	0	0	0	0	NA	0	NA	0	0	0	0	0	0	0	0	0	0	0	0	0	0
SIXTH	Mesobacillus	35	15	5	5	14.2857	3	20	5	5	14.2857	3	20	2	0.4	2	0.4	5	5	14.2857	3	20	2	2	5	5	14.2857	3	20	2	2
SEVENTH	unclassified_Mesobacillus	4	4	2	2	50	2	50	2	2	50	2	50	1	0.5	1	0.5	2	2	50	2	50	1	1	2	2	50	2	50	1	1
SIXTH	Metabacillus	59	28	28	28	47.4576	13	46.4286	28	28	47.4576	13	46.4286	8	0.285714	8	0.285714	28	28	47.4576	13	46.4286	8	8	27	27	45.7627	12	42.8571	7	7
SEVENTH	environmental_samples	3	1	0	0	0	0	0	0	0	0	0	0	0	NA	0	NA	0	0	0	0	0	0	0	0	0	0	0	0	0	0
SEVENTH	unclassified_Metabacillus	7	7	3	3	42.8571	3	42.8571	3	3	42.8571	3	42.8571	2	0.666667	2	0.666667	3	3	42.8571	3	42.8571	2	2	3	3	42.8571	3	42.8571	2	2
SIXTH	Microaerobacter	1	1	0	0	0	0	0	0	0	0	0	0	0	NA	0	NA	0	0	0	0	0	0	0	0	0	0	0	0	0	0
SIXTH	Natribacillus	1	1	0	0	0	0	0	0	0	0	0	0	0	NA	0	NA	0	0	0	0	0	0	0	0	0	0	0	0	0	0
SIXTH	Natronobacillus	1	1	0	0	0	0	0	0	0	0	0	0	0	NA	0	NA	0	0	0	0	0	0	0	0	0	0	0	0	0	0
SIXTH	Neobacillus	108	47	33	32	29.6296	19	40.4255	33	32	29.6296	19	40.4255	2	0.0606061	2	0.0606061	33	32	29.6296	19	40.4255	2	2	31	30	27.7778	17	36.1702	1	1
SEVENTH	unclassified_Neobacillus	23	22	6	6	26.087	6	27.2727	6	6	26.087	6	27.2727	1	0.166667	1	0.166667	6	6	26.087	6	27.2727	1	1	6	6	26.087	6	27.2727	1	1
SIXTH	Niallia	65	25	3	3	4.61538	3	12	3	3	4.61538	3	12	3	1	3	1	3	3	4.61538	3	12	3	3	2	2	3.07692	2	8	2	2
SEVENTH	unclassified_Niallia	18	18	2	2	11.1111	2	11.1111	2	2	11.1111	2	11.1111	2	1	2	1	2	2	11.1111	2	11.1111	2	2	1	1	5.55556	1	5.55556	1	1
SIXTH	Numidum	2	1	2	2	100	1	100	2	2	100	1	100	1	0.5	1	0.5	2	2	100	1	100	1	1	2	2	100	1	100	1	1
SIXTH	Oceanobacillus	79	50	70	67	84.8101	39	78	70	67	84.8101	39	78	13	0.185714	15	0.214286	70	67	84.8101	39	78	13	15	65	63	79.7468	35	70	13	15
SEVENTH	unclassified_Oceanobacillus	20	20	20	19	95	19	95	20	19	95	19	95	7	0.35	7	0.35	20	19	95	19	95	7	7	16	16	80	16	80	7	7
SIXTH	Oikeobacillus	1	1	0	0	0	0	0	0	0	0	0	0	0	NA	0	NA	0	0	0	0	0	0	0	0	0	0	0	0	0	0
SIXTH	Ornithinibacillus	14	14	1	1	7.14286	1	7.14286	1	1	7.14286	1	7.14286	1	1	1	1	1	1	7.14286	1	7.14286	1	1	1	1	7.14286	1	7.14286	1	1
SEVENTH	unclassified_Ornithinibacillus	4	4	0	0	0	0	0	0	0	0	0	0	0	NA	0	NA	0	0	0	0	0	0	0	0	0	0	0	0	0	0
SIXTH	Paenalkalicoccus	1	1	0	0	0	0	0	0	0	0	0	0	0	NA	0	NA	0	0	0	0	0	0	0	0	0	0	0	0	0	0
SIXTH	Pallidibacillus	4	2	0	0	0	0	0	0	0	0	0	0	0	NA	0	NA	0	0	0	0	0	0	0	0	0	0	0	0	0	0
SIXTH	Parageobacillus	46	9	0	0	0	0	0	0	0	0	0	0	0	NA	0	NA	0	0	0	0	0	0	0	0	0	0	0	0	0	0
SEVENTH	unclassified_Parageobacillus	3	3	0	0	0	0	0	0	0	0	0	0	0	NA	0	NA	0	0	0	0	0	0	0	0	0	0	0	0	0	0
SIXTH	Paraliobacillus	12	8	0	0	0	0	0	0	0	0	0	0	0	NA	0	NA	0	0	0	0	0	0	0	0	0	0	0	0	0	0
SEVENTH	unclassified_Paraliobacillus	3	3	0	0	0	0	0	0	0	0	0	0	0	NA	0	NA	0	0	0	0	0	0	0	0	0	0	0	0	0	0
SIXTH	Paucisalibacillus	3	2	0	0	0	0	0	0	0	0	0	0	0	NA	0	NA	0	0	0	0	0	0	0	0	0	0	0	0	0	0
SEVENTH	unclassified_Paucisalibacillus	1	1	0	0	0	0	0	0	0	0	0	0	0	NA	0	NA	0	0	0	0	0	0	0	0	0	0	0	0	0	0
SIXTH	Pelagirhabdus	1	1	0	0	0	0	0	0	0	0	0	0	0	NA	0	NA	0	0	0	0	0	0	0	0	0	0	0	0	0	0
SIXTH	Peribacillus	184	46	138	138	75	25	54.3478	138	138	75	25	54.3478	4	0.0289855	4	0.0289855	138	138	75	25	54.3478	4	4	103	103	55.9783	21	45.6522	4	4
SEVENTH	unclassified_Peribacillus	28	28	17	17	60.7143	17	60.7143	17	17	60.7143	17	60.7143	2	0.117647	3	0.176471	17	17	60.7143	17	60.7143	2	3	14	14	50	14	50	2	3
SIXTH	Perspicuibacillus	1	1	0	0	0	0	0	0	0	0	0	0	0	NA	0	NA	0	0	0	0	0	0	0	0	0	0	0	0	0	0
SIXTH	Piscibacillus	4	2	0	0	0	0	0	0	0	0	0	0	0	NA	0	NA	0	0	0	0	0	0	0	0	0	0	0	0	0	0
SIXTH	Pontibacillus	15	9	0	0	0	0	0	0	0	0	0	0	0	NA	0	NA	0	0	0	0	0	0	0	0	0	0	0	0	0	0
SEVENTH	unclassified_Pontibacillus	3	3	0	0	0	0	0	0	0	0	0	0	0	NA	0	NA	0	0	0	0	0	0	0	0	0	0	0	0	0	0
SIXTH	Pradoshia	2	2	0	0	0	0	0	0	0	0	0	0	0	NA	0	NA	0	0	0	0	0	0	0	0	0	0	0	0	0	0
SEVENTH	unclassified_Pradoshia	1	1	0	0	0	0	0	0	0	0	0	0	0	NA	0	NA	0	0	0	0	0	0	0	0	0	0	0	0	0	0
SIXTH	Priestia	563	24	564	523	92.8952	19	79.1667	561	520	92.3623	19	79.1667	7	0.0124777	7	0.0124777	560	520	92.3623	19	79.1667	6	6	557	517	91.8295	19	79.1667	5	5
SEVENTH	unclassified_Priestia	15	15	14	13	86.6667	13	86.6667	14	13	86.6667	13	86.6667	3	0.214286	3	0.214286	14	13	86.6667	13	86.6667	3	3	14	13	86.6667	13	86.6667	3	3
SIXTH	Pseudalkalibacillus	16	9	2	2	12.5	1	11.1111	2	2	12.5	1	11.1111	2	1	2	1	2	2	12.5	1	11.1111	2	2	1	1	6.25	1	11.1111	1	1
SEVENTH	unclassified_Pseudalkalibacillus	2	2	0	0	0	0	0	0	0	0	0	0	0	NA	0	NA	0	0	0	0	0	0	0	0	0	0	0	0	0	0
SIXTH	Pseudobacillus	1	1	1	1	100	1	100	1	1	100	1	100	1	1	1	1	1	1	100	1	100	1	1	1	1	100	1	100	1	1
SEVENTH	unclassified_Pseudobacillus	1	1	1	1	100	1	100	1	1	100	1	100	1	1	1	1	1	1	100	1	100	1	1	1	1	100	1	100	1	1
SIXTH	Pseudogracilibacillus	6	5	1	1	16.6667	1	20	1	1	16.6667	1	20	1	1	1	1	1	1	16.6667	1	20	1	1	1	1	16.6667	1	20	1	1
SEVENTH	unclassified_Pseudogracilibacillus	4	4	1	1	25	1	25	1	1	25	1	25	1	1	1	1	1	1	25	1	25	1	1	1	1	25	1	25	1	1
SIXTH	Pseudoneobacillus	1	1	0	0	0	0	0	0	0	0	0	0	0	NA	0	NA	0	0	0	0	0	0	0	0	0	0	0	0	0	0
SIXTH	Psychrobacillus	40	36	1	1	2.5	1	2.77778	1	1	2.5	1	2.77778	1	1	1	1	1	1	2.5	1	2.77778	1	1	0	0	0	0	0	0	0
SEVENTH	environmental_samples	1	1	0	0	0	0	0	0	0	0	0	0	0	NA	0	NA	0	0	0	0	0	0	0	0	0	0	0	0	0	0
SEVENTH	unclassified_Psychrobacillus	26	26	1	1	3.84615	1	3.84615	1	1	3.84615	1	3.84615	1	1	1	1	1	1	3.84615	1	3.84615	1	1	0	0	0	0	0	0	0
SIXTH	Pueribacillus	1	1	0	0	0	0	0	0	0	0	0	0	0	NA	0	NA	0	0	0	0	0	0	0	0	0	0	0	0	0	0
SIXTH	Radiobacillus	2	2	1	1	50	1	50	1	1	50	1	50	1	1	1	1	1	1	50	1	50	1	1	1	1	50	1	50	1	1
SIXTH	Robertmurraya	14	9	4	4	28.5714	3	33.3333	4	4	28.5714	3	33.3333	1	0.25	1	0.25	4	4	28.5714	3	33.3333	1	1	4	4	28.5714	3	33.3333	1	1
SEVENTH	unclassified_Robertmurraya	3	3	2	2	66.6667	2	66.6667	2	2	66.6667	2	66.6667	1	0.5	1	0.5	2	2	66.6667	2	66.6667	1	1	2	2	66.6667	2	66.6667	1	1
SIXTH	Rossellomorea	64	16	46	43	67.1875	11	68.75	46	43	67.1875	11	68.75	4	0.0869565	5	0.108696	46	43	67.1875	11	68.75	4	5	41	39	60.9375	11	68.75	4	5
SEVENTH	environmental_samples	1	1	0	0	0	0	0	0	0	0	0	0	0	NA	0	NA	0	0	0	0	0	0	0	0	0	0	0	0	0	0
SEVENTH	unclassified_Rossellomorea	9	9	6	6	66.6667	6	66.6667	6	6	66.6667	6	66.6667	2	0.333333	2	0.333333	6	6	66.6667	6	66.6667	2	2	6	6	66.6667	6	66.6667	2	2
SIXTH	Rubeoparvulum	2	1	2	2	100	1	100	2	2	100	1	100	1	0.5	1	0.5	2	2	100	1	100	1	1	2	2	100	1	100	1	1
SIXTH	Saccharococcus	2	2	0	0	0	0	0	0	0	0	0	0	0	NA	0	NA	0	0	0	0	0	0	0	0	0	0	0	0	0	0
SEVENTH	unclassified_Saccharococcus	1	1	0	0	0	0	0	0	0	0	0	0	0	NA	0	NA	0	0	0	0	0	0	0	0	0	0	0	0	0	0
SIXTH	Salibacterium	5	4	5	4	80	3	75	4	4	80	3	75	3	0.75	4	1	4	4	80	3	75	3	4	4	4	80	3	75	3	4
SIXTH	Salicibibacter	4	4	1	1	25	1	25	1	1	25	1	25	1	1	1	1	1	1	25	1	25	1	1	0	0	0	0	0	0	0
SIXTH	Salimicrobium	10	7	0	0	0	0	0	0	0	0	0	0	0	NA	0	NA	0	0	0	0	0	0	0	0	0	0	0	0	0	0
SEVENTH	unclassified_Salimicrobium	1	1	0	0	0	0	0	0	0	0	0	0	0	NA	0	NA	0	0	0	0	0	0	0	0	0	0	0	0	0	0
SIXTH	Salinibacillus	3	3	0	0	0	0	0	0	0	0	0	0	0	NA	0	NA	0	0	0	0	0	0	0	0	0	0	0	0	0	0
SIXTH	Salipaludibacillus	12	7	10	8	66.6667	3	42.8571	10	8	66.6667	3	42.8571	4	0.4	4	0.4	8	6	50	3	42.8571	3	3	8	6	50	3	42.8571	3	3
SEVENTH	unclassified_Salipaludibacillus	2	2	1	1	50	1	50	1	1	50	1	50	1	1	1	1	1	1	50	1	50	1	1	1	1	50	1	50	1	1
SIXTH	Salirhabdus	4	3	0	0	0	0	0	0	0	0	0	0	0	NA	0	NA	0	0	0	0	0	0	0	0	0	0	0	0	0	0
SEVENTH	unclassified_Salirhabdus	1	1	0	0	0	0	0	0	0	0	0	0	0	NA	0	NA	0	0	0	0	0	0	0	0	0	0	0	0	0	0
SIXTH	Salisediminibacterium	6	4	0	0	0	0	0	0	0	0	0	0	0	NA	0	NA	0	0	0	0	0	0	0	0	0	0	0	0	0	0
SIXTH	Saliterribacillus	1	1	1	1	100	1	100	1	1	100	1	100	1	1	1	1	1	1	100	1	100	1	1	1	1	100	1	100	1	1
SIXTH	Salsuginibacillus	2	2	0	0	0	0	0	0	0	0	0	0	0	NA	0	NA	0	0	0	0	0	0	0	0	0	0	0	0	0	0
SIXTH	Schinkia	24	1	0	0	0	0	0	0	0	0	0	0	0	NA	0	NA	0	0	0	0	0	0	0	0	0	0	0	0	0	0
SIXTH	Sediminibacillus	6	6	6	6	100	6	100	6	6	100	6	100	2	0.333333	2	0.333333	6	6	100	6	100	2	2	6	6	100	6	100	2	2
SEVENTH	unclassified_Sediminibacillus	1	1	1	1	100	1	100	1	1	100	1	100	1	1	1	1	1	1	100	1	100	1	1	1	1	100	1	100	1	1
SIXTH	Shouchella	75	12	77	73	97.3333	10	83.3333	75	73	97.3333	10	83.3333	5	0.0666667	5	0.0666667	75	73	97.3333	10	83.3333	5	5	72	72	96	9	75	3	3
SEVENTH	unclassified_Shouchella	1	1	0	0	0	0	0	0	0	0	0	0	0	NA	0	NA	0	0	0	0	0	0	0	0	0	0	0	0	0	0
SIXTH	Siminovitchia	24	7	6	6	25	2	28.5714	6	6	25	2	28.5714	1	0.166667	2	0.333333	6	6	25	2	28.5714	1	2	5	5	20.8333	2	28.5714	1	2
SEVENTH	unclassified_Siminovitchia	2	2	0	0	0	0	0	0	0	0	0	0	0	NA	0	NA	0	0	0	0	0	0	0	0	0	0	0	0	0	0
SIXTH	Streptohalobacillus	1	1	0	0	0	0	0	0	0	0	0	0	0	NA	0	NA	0	0	0	0	0	0	0	0	0	0	0	0	0	0
SIXTH	Sutcliffiella	18	8	0	0	0	0	0	0	0	0	0	0	0	NA	0	NA	0	0	0	0	0	0	0	0	0	0	0	0	0	0
SEVENTH	unclassified_Sutcliffiella	4	3	0	0	0	0	0	0	0	0	0	0	0	NA	0	NA	0	0	0	0	0	0	0	0	0	0	0	0	0	0
SIXTH	Tenuibacillus	2	1	0	0	0	0	0	0	0	0	0	0	0	NA	0	NA	0	0	0	0	0	0	0	0	0	0	0	0	0	0
SIXTH	Tepidibacillus	4	4	0	0	0	0	0	0	0	0	0	0	0	NA	0	NA	0	0	0	0	0	0	0	0	0	0	0	0	0	0
SEVENTH	unclassified_Tepidibacillus	1	1	0	0	0	0	0	0	0	0	0	0	0	NA	0	NA	0	0	0	0	0	0	0	0	0	0	0	0	0	0
SIXTH	Terribacillus	26	9	17	17	65.3846	8	88.8889	17	17	65.3846	8	88.8889	3	0.176471	3	0.176471	17	17	65.3846	8	88.8889	3	3	17	17	65.3846	8	88.8889	3	3
SEVENTH	unclassified_Terribacillus	5	5	5	5	100	5	100	5	5	100	5	100	3	0.6	3	0.6	5	5	100	5	100	3	3	5	5	100	5	100	3	3
SIXTH	Terrihalobacillus	2	1	0	0	0	0	0	0	0	0	0	0	0	NA	0	NA	0	0	0	0	0	0	0	0	0	0	0	0	0	0
SIXTH	Terrilactibacillus	3	2	0	0	0	0	0	0	0	0	0	0	0	NA	0	NA	0	0	0	0	0	0	0	0	0	0	0	0	0	0
SIXTH	Texcoconibacillus	1	1	0	0	0	0	0	0	0	0	0	0	0	NA	0	NA	0	0	0	0	0	0	0	0	0	0	0	0	0	0
SIXTH	Thalassobacillus	9	5	2	2	22.2222	2	40	2	2	22.2222	2	40	1	0.5	1	0.5	2	2	22.2222	2	40	1	1	2	2	22.2222	2	40	1	1
SEVENTH	unclassified_Thalassobacillus	2	2	0	0	0	0	0	0	0	0	0	0	0	NA	0	NA	0	0	0	0	0	0	0	0	0	0	0	0	0	0
SIXTH	Thermolongibacillus	2	1	0	0	0	0	0	0	0	0	0	0	0	NA	0	NA	0	0	0	0	0	0	0	0	0	0	0	0	0	0
SIXTH	Tigheibacillus	1	1	0	0	0	0	0	0	0	0	0	0	0	NA	0	NA	0	0	0	0	0	0	0	0	0	0	0	0	0	0
SIXTH	Virgibacillus	100	48	78	76	76	28	58.3333	78	76	76	28	58.3333	18	0.230769	18	0.230769	78	76	76	28	58.3333	18	18	77	75	75	27	56.25	17	17
SEVENTH	environmental_samples	3	1	3	3	100	1	100	3	3	100	1	100	1	0.333333	1	0.333333	3	3	100	1	100	1	1	3	3	100	1	100	1	1
SEVENTH	unclassified_Virgibacillus	23	20	12	12	52.1739	11	55	12	12	52.1739	11	55	7	0.583333	7	0.583333	12	12	52.1739	11	55	7	7	11	11	47.8261	10	50	6	6
SIXTH	Vulcanibacillus	1	1	0	0	0	0	0	0	0	0	0	0	0	NA	0	NA	0	0	0	0	0	0	0	0	0	0	0	0	0	0
FIFTH	Bacillales_incertae_sedis	285	206	0	0	0	0	0	0	0	0	0	0	0	NA	0	NA	0	0	0	0	0	0	0	0	0	0	0	0	0	0
SIXTH	Bacillales_Family_XII_Incertae_Sedis	269	195	0	0	0	0	0	0	0	0	0	0	0	NA	0	NA	0	0	0	0	0	0	0	0	0	0	0	0	0	0
SEVENTH	Exiguobacterium	269	195	0	0	0	0	0	0	0	0	0	0	0	NA	0	NA	0	0	0	0	0	0	0	0	0	0	0	0	0	0
EIGHTH	environmental_samples	3	1	0	0	0	0	0	0	0	0	0	0	0	NA	0	NA	0	0	0	0	0	0	0	0	0	0	0	0	0	0
EIGHTH	unclassified_Exiguobacterium	193	177	0	0	0	0	0	0	0	0	0	0	0	NA	0	NA	0	0	0	0	0	0	0	0	0	0	0	0	0	0
SIXTH	Bacillales_Family_X_Incertae_Sedis	9	4	0	0	0	0	0	0	0	0	0	0	0	NA	0	NA	0	0	0	0	0	0	0	0	0	0	0	0	0	0
SEVENTH	Brockia	1	1	0	0	0	0	0	0	0	0	0	0	0	NA	0	NA	0	0	0	0	0	0	0	0	0	0	0	0	0	0
SEVENTH	Hydrogenibacillus	7	2	0	0	0	0	0	0	0	0	0	0	0	NA	0	NA	0	0	0	0	0	0	0	0	0	0	0	0	0	0
EIGHTH	unclassified_Hydrogenibacillus	1	1	0	0	0	0	0	0	0	0	0	0	0	NA	0	NA	0	0	0	0	0	0	0	0	0	0	0	0	0	0
SEVENTH	Thermicanus	1	1	0	0	0	0	0	0	0	0	0	0	0	NA	0	NA	0	0	0	0	0	0	0	0	0	0	0	0	0	0
SIXTH	Geomicrobium	7	7	0	0	0	0	0	0	0	0	0	0	0	NA	0	NA	0	0	0	0	0	0	0	0	0	0	0	0	0	0
SEVENTH	unclassified_Geomicrobium	5	5	0	0	0	0	0	0	0	0	0	0	0	NA	0	NA	0	0	0	0	0	0	0	0	0	0	0	0	0	0
FIFTH	Gemellaceae	72	21	0	0	0	0	0	0	0	0	0	0	0	NA	0	NA	0	0	0	0	0	0	0	0	0	0	0	0	0	0
SIXTH	Gemella	69	19	0	0	0	0	0	0	0	0	0	0	0	NA	0	NA	0	0	0	0	0	0	0	0	0	0	0	0	0	0
SEVENTH	environmental_samples	8	1	0	0	0	0	0	0	0	0	0	0	0	NA	0	NA	0	0	0	0	0	0	0	0	0	0	0	0	0	0
SEVENTH	unclassified_Gemella	12	12	0	0	0	0	0	0	0	0	0	0	0	NA	0	NA	0	0	0	0	0	0	0	0	0	0	0	0	0	0
SIXTH	Gemelliphila	3	2	0	0	0	0	0	0	0	0	0	0	0	NA	0	NA	0	0	0	0	0	0	0	0	0	0	0	0	0	0
FIFTH	Listeriaceae	5989	41	153	127	2.12055	16	39.0244	150	124	2.07046	16	39.0244	15	0.1	14	0.0933333	150	124	2.07046	16	39.0244	15	14	142	122	2.03707	14	34.1463	12	11
SIXTH	Brochothrix	30	3	0	0	0	0	0	0	0	0	0	0	0	NA	0	NA	0	0	0	0	0	0	0	0	0	0	0	0	0	0
SEVENTH	unclassified_Brochothrix	1	1	0	0	0	0	0	0	0	0	0	0	0	NA	0	NA	0	0	0	0	0	0	0	0	0	0	0	0	0	0
SIXTH	Listeria	5959	38	153	127	2.13123	16	42.1053	150	124	2.08089	16	42.1053	15	0.1	14	0.0933333	150	124	2.08089	16	42.1053	15	14	142	122	2.04732	14	36.8421	12	11
SEVENTH	unclassified_Listeria	10	10	4	3	30	3	30	4	3	30	3	30	4	1	4	1	4	3	30	3	30	4	4	3	2	20	2	20	3	3
FIFTH	Paenibacillaceae	1759	958	224	220	12.5071	95	9.91649	215	213	12.1092	95	9.91649	29	0.134884	30	0.139535	215	213	12.1092	95	9.91649	29	30	210	208	11.8249	94	9.81211	28	29
SIXTH	Ammoniphilus	5	5	0	0	0	0	0	0	0	0	0	0	0	NA	0	NA	0	0	0	0	0	0	0	0	0	0	0	0	0	0
SEVENTH	unclassified_Ammoniphilus	3	3	0	0	0	0	0	0	0	0	0	0	0	NA	0	NA	0	0	0	0	0	0	0	0	0	0	0	0	0	0
SIXTH	Aneurinibacillus	43	12	0	0	0	0	0	0	0	0	0	0	0	NA	0	NA	0	0	0	0	0	0	0	0	0	0	0	0	0	0
SEVENTH	unclassified_Aneurinibacillus	5	4	0	0	0	0	0	0	0	0	0	0	0	NA	0	NA	0	0	0	0	0	0	0	0	0	0	0	0	0	0
SIXTH	Brevibacillus	234	69	74	72	30.7692	30	43.4783	73	72	30.7692	30	43.4783	7	0.0958904	7	0.0958904	73	72	30.7692	30	43.4783	7	7	70	69	29.4872	30	43.4783	7	7
SEVENTH	environmental_samples	1	1	1	1	100	1	100	1	1	100	1	100	1	1	1	1	1	1	100	1	100	1	1	1	1	100	1	100	1	1
SEVENTH	unclassified_Brevibacillus	39	39	19	19	48.7179	19	48.7179	19	19	48.7179	19	48.7179	2	0.105263	2	0.105263	19	19	48.7179	19	48.7179	2	2	19	19	48.7179	19	48.7179	2	2
SIXTH	Chengkuizengella	4	4	0	0	0	0	0	0	0	0	0	0	0	NA	0	NA	0	0	0	0	0	0	0	0	0	0	0	0	0	0
SEVENTH	unclassified_Chengkuizengella	1	1	0	0	0	0	0	0	0	0	0	0	0	NA	0	NA	0	0	0	0	0	0	0	0	0	0	0	0	0	0
SIXTH	Cohnella	48	41	1	1	2.08333	1	2.43902	1	1	2.08333	1	2.43902	1	1	1	1	1	1	2.08333	1	2.43902	1	1	1	1	2.08333	1	2.43902	1	1
SEVENTH	unclassified_Cohnella	15	12	0	0	0	0	0	0	0	0	0	0	0	NA	0	NA	0	0	0	0	0	0	0	0	0	0	0	0	0	0
SIXTH	Ferviditalea	1	1	0	0	0	0	0	0	0	0	0	0	0	NA	0	NA	0	0	0	0	0	0	0	0	0	0	0	0	0	0
SIXTH	Fontibacillus	3	3	0	0	0	0	0	0	0	0	0	0	0	NA	0	NA	0	0	0	0	0	0	0	0	0	0	0	0	0	0
SIXTH	Gordonibacillus	1	1	0	0	0	0	0	0	0	0	0	0	0	NA	0	NA	0	0	0	0	0	0	0	0	0	0	0	0	0	0
SIXTH	Gorillibacterium	4	3	0	0	0	0	0	0	0	0	0	0	0	NA	0	NA	0	0	0	0	0	0	0	0	0	0	0	0	0	0
SEVENTH	unclassified_Gorillibacterium	1	1	0	0	0	0	0	0	0	0	0	0	0	NA	0	NA	0	0	0	0	0	0	0	0	0	0	0	0	0	0
SIXTH	Insulibacter	1	1	0	0	0	0	0	0	0	0	0	0	0	NA	0	NA	0	0	0	0	0	0	0	0	0	0	0	0	0	0
SIXTH	Longirhabdus	1	1	0	0	0	0	0	0	0	0	0	0	0	NA	0	NA	0	0	0	0	0	0	0	0	0	0	0	0	0	0
SIXTH	Paenibacillus	1393	801	149	147	10.5528	64	7.99001	141	140	10.0503	64	7.99001	23	0.163121	24	0.170213	141	140	10.0503	64	7.99001	23	24	139	138	9.90668	63	7.86517	22	23
SEVENTH	environmental_samples	6	1	0	0	0	0	0	0	0	0	0	0	0	NA	0	NA	0	0	0	0	0	0	0	0	0	0	0	0	0	0
SEVENTH	unclassified_Paenibacillus	538	507	35	35	6.50558	34	6.70611	34	34	6.3197	34	6.70611	12	0.352941	12	0.352941	34	34	6.3197	34	6.70611	12	12	34	34	6.3197	34	6.70611	12	12
SIXTH	Saccharibacillus	15	11	0	0	0	0	0	0	0	0	0	0	0	NA	0	NA	0	0	0	0	0	0	0	0	0	0	0	0	0	0
SEVENTH	unclassified_Saccharibacillus	4	4	0	0	0	0	0	0	0	0	0	0	0	NA	0	NA	0	0	0	0	0	0	0	0	0	0	0	0	0	0
SIXTH	Thermobacillus	4	4	0	0	0	0	0	0	0	0	0	0	0	NA	0	NA	0	0	0	0	0	0	0	0	0	0	0	0	0	0
SEVENTH	unclassified_Thermobacillus	2	2	0	0	0	0	0	0	0	0	0	0	0	NA	0	NA	0	0	0	0	0	0	0	0	0	0	0	0	0	0
SIXTH	Xylanibacillus	2	1	0	0	0	0	0	0	0	0	0	0	0	NA	0	NA	0	0	0	0	0	0	0	0	0	0	0	0	0	0
FIFTH	Pasteuriaceae	1	1	0	0	0	0	0	0	0	0	0	0	0	NA	0	NA	0	0	0	0	0	0	0	0	0	0	0	0	0	0
SIXTH	Pasteuria	1	1	0	0	0	0	0	0	0	0	0	0	0	NA	0	NA	0	0	0	0	0	0	0	0	0	0	0	0	0	0
FIFTH	Planococcaceae	364	265	22	21	5.76923	18	6.79245	21	20	5.49451	17	6.41509	12	0.571429	12	0.571429	21	20	5.49451	17	6.41509	12	12	17	16	4.3956	13	4.90566	9	9
SIXTH	Bhargavaea	11	6	0	0	0	0	0	0	0	0	0	0	0	NA	0	NA	0	0	0	0	0	0	0	0	0	0	0	0	0	0
SEVENTH	unclassified_Bhargavaea	1	1	0	0	0	0	0	0	0	0	0	0	0	NA	0	NA	0	0	0	0	0	0	0	0	0	0	0	0	0	0
SIXTH	Caryophanon	2	2	0	0	0	0	0	0	0	0	0	0	0	NA	0	NA	0	0	0	0	0	0	0	0	0	0	0	0	0	0
SIXTH	Chryseomicrobium	3	3	0	0	0	0	0	0	0	0	0	0	0	NA	0	NA	0	0	0	0	0	0	0	0	0	0	0	0	0	0
SEVENTH	unclassified_Chryseomicrobium	1	1	0	0	0	0	0	0	0	0	0	0	0	NA	0	NA	0	0	0	0	0	0	0	0	0	0	0	0	0	0
SIXTH	Filibacter	1	1	0	0	0	0	0	0	0	0	0	0	0	NA	0	NA	0	0	0	0	0	0	0	0	0	0	0	0	0	0
SIXTH	Indiicoccus	1	1	0	0	0	0	0	0	0	0	0	0	0	NA	0	NA	0	0	0	0	0	0	0	0	0	0	0	0	0	0
SIXTH	Jeotgalibacillus	13	13	3	3	23.0769	3	23.0769	3	3	23.0769	3	23.0769	3	1	3	1	3	3	23.0769	3	23.0769	3	3	3	3	23.0769	3	23.0769	3	3
SEVENTH	unclassified_Jeotgalibacillus	4	4	3	3	75	3	75	3	3	75	3	75	3	1	3	1	3	3	75	3	75	3	3	3	3	75	3	75	3	3
SIXTH	Kurthia	27	11	2	2	7.40741	2	18.1818	2	2	7.40741	2	18.1818	1	0.5	1	0.5	2	2	7.40741	2	18.1818	1	1	0	0	0	0	0	0	0
SEVENTH	unclassified_Kurthia	5	5	2	2	40	2	40	2	2	40	2	40	1	0.5	1	0.5	2	2	40	2	40	1	1	0	0	0	0	0	0	0
SIXTH	Metalysinibacillus	1	1	0	0	0	0	0	0	0	0	0	0	0	NA	0	NA	0	0	0	0	0	0	0	0	0	0	0	0	0	0
SIXTH	Metasolibacillus	7	5	0	0	0	0	0	0	0	0	0	0	0	NA	0	NA	0	0	0	0	0	0	0	0	0	0	0	0	0	0
SEVENTH	unclassified_Metasolibacillus	4	3	0	0	0	0	0	0	0	0	0	0	0	NA	0	NA	0	0	0	0	0	0	0	0	0	0	0	0	0	0
SIXTH	Paenisporosarcina	9	9	0	0	0	0	0	0	0	0	0	0	0	NA	0	NA	0	0	0	0	0	0	0	0	0	0	0	0	0	0
SEVENTH	unclassified_Paenisporosarcina	5	5	0	0	0	0	0	0	0	0	0	0	0	NA	0	NA	0	0	0	0	0	0	0	0	0	0	0	0	0	0
SIXTH	Planococcus	76	51	0	0	0	0	0	0	0	0	0	0	0	NA	0	NA	0	0	0	0	0	0	0	0	0	0	0	0	0	0
SEVENTH	environmental_samples	1	1	0	0	0	0	0	0	0	0	0	0	0	NA	0	NA	0	0	0	0	0	0	0	0	0	0	0	0	0	0
SEVENTH	unclassified_Planococcus_in_firmicutes	22	22	0	0	0	0	0	0	0	0	0	0	0	NA	0	NA	0	0	0	0	0	0	0	0	0	0	0	0	0	0
SIXTH	Planomicrobium	13	8	0	0	0	0	0	0	0	0	0	0	0	NA	0	NA	0	0	0	0	0	0	0	0	0	0	0	0	0	0
SEVENTH	unclassified_Planomicrobium	5	5	0	0	0	0	0	0	0	0	0	0	0	NA	0	NA	0	0	0	0	0	0	0	0	0	0	0	0	0	0
SIXTH	Rummeliibacillus	14	9	7	7	50	4	44.4444	7	7	50	4	44.4444	2	0.285714	2	0.285714	7	7	50	4	44.4444	2	2	6	6	42.8571	3	33.3333	1	1
SEVENTH	environmental_samples	1	1	0	0	0	0	0	0	0	0	0	0	0	NA	0	NA	0	0	0	0	0	0	0	0	0	0	0	0	0	0
SEVENTH	unclassified_Rummeliibacillus	5	5	2	2	40	2	40	2	2	40	2	40	1	0.5	1	0.5	2	2	40	2	40	1	1	2	2	40	2	40	1	1
SIXTH	Savagea	1	1	0	0	0	0	0	0	0	0	0	0	0	NA	0	NA	0	0	0	0	0	0	0	0	0	0	0	0	0	0
SIXTH	Solibacillus	34	28	2	2	5.88235	2	7.14286	1	1	2.94118	1	3.57143	1	1	1	1	1	1	2.94118	1	3.57143	1	1	1	1	2.94118	1	3.57143	1	1
SEVENTH	unclassified_Solibacillus	23	20	2	2	8.69565	2	10	1	1	4.34783	1	5	1	1	1	1	1	1	4.34783	1	5	1	1	1	1	4.34783	1	5	1	1
SIXTH	Sporosarcina	107	85	7	6	5.60748	6	7.05882	7	6	5.60748	6	7.05882	4	0.571429	4	0.571429	7	6	5.60748	6	7.05882	4	4	7	6	5.60748	6	7.05882	4	4
SEVENTH	unclassified_Sporosarcina	63	62	3	3	4.7619	3	4.83871	3	3	4.7619	3	4.83871	2	0.666667	2	0.666667	3	3	4.7619	3	4.83871	2	2	3	3	4.7619	3	4.83871	2	2
SIXTH	Tetzosporium	1	1	0	0	0	0	0	0	0	0	0	0	0	NA	0	NA	0	0	0	0	0	0	0	0	0	0	0	0	0	0
SIXTH	Ureibacillus	30	19	0	0	0	0	0	0	0	0	0	0	0	NA	0	NA	0	0	0	0	0	0	0	0	0	0	0	0	0	0
SEVENTH	unclassified_Ureibacillus	8	8	0	0	0	0	0	0	0	0	0	0	0	NA	0	NA	0	0	0	0	0	0	0	0	0	0	0	0	0	0
SIXTH	Viridibacillus	13	11	1	1	7.69231	1	9.09091	1	1	7.69231	1	9.09091	1	1	1	1	1	1	7.69231	1	9.09091	1	1	0	0	0	0	0	0	0
SEVENTH	unclassified_Viridibacillus	8	8	0	0	0	0	0	0	0	0	0	0	0	NA	0	NA	0	0	0	0	0	0	0	0	0	0	0	0	0	0
FIFTH	Salinicoccaceae	6	4	0	0	0	0	0	0	0	0	0	0	0	NA	0	NA	0	0	0	0	0	0	0	0	0	0	0	0	0	0
SIXTH	Lacicoccus	2	2	0	0	0	0	0	0	0	0	0	0	0	NA	0	NA	0	0	0	0	0	0	0	0	0	0	0	0	0	0
SIXTH	Phocicoccus	4	2	0	0	0	0	0	0	0	0	0	0	0	NA	0	NA	0	0	0	0	0	0	0	0	0	0	0	0	0	0
FIFTH	Sporolactobacillaceae	39	28	14	14	35.8974	8	28.5714	8	8	20.5128	7	25	6	0.75	6	0.75	8	8	20.5128	7	25	6	6	6	6	15.3846	6	21.4286	5	5
SIXTH	Caenibacillus	1	1	0	0	0	0	0	0	0	0	0	0	0	NA	0	NA	0	0	0	0	0	0	0	0	0	0	0	0	0	0
SIXTH	Pullulanibacillus	4	3	3	3	75	2	66.6667	2	2	50	1	33.3333	1	0.5	1	0.5	2	2	50	1	33.3333	1	1	0	0	0	0	0	0	0
SEVENTH	unclassified_Pullulanibacillus	1	1	0	0	0	0	0	0	0	0	0	0	0	NA	0	NA	0	0	0	0	0	0	0	0	0	0	0	0	0	0
SIXTH	Scopulibacillus	2	2	2	2	100	2	100	2	2	100	2	100	2	1	2	1	2	2	100	2	100	2	2	2	2	100	2	100	2	2
SIXTH	Sinobaca	2	2	0	0	0	0	0	0	0	0	0	0	0	NA	0	NA	0	0	0	0	0	0	0	0	0	0	0	0	0	0
SEVENTH	unclassified_Sinobaca	1	1	0	0	0	0	0	0	0	0	0	0	0	NA	0	NA	0	0	0	0	0	0	0	0	0	0	0	0	0	0
SIXTH	Sporolactobacillus	28	18	8	8	28.5714	3	16.6667	3	3	10.7143	3	16.6667	2	0.666667	2	0.666667	3	3	10.7143	3	16.6667	2	2	3	3	10.7143	3	16.6667	2	2
SEVENTH	unclassified_Sporolactobacillus	6	6	2	2	33.3333	2	33.3333	2	2	33.3333	2	33.3333	1	0.5	1	0.5	2	2	33.3333	2	33.3333	1	1	2	2	33.3333	2	33.3333	1	1
SIXTH	Tuberibacillus	2	2	1	1	50	1	50	1	1	50	1	50	1	1	1	1	1	1	50	1	50	1	1	1	1	50	1	50	1	1
SEVENTH	unclassified_Tuberibacillus	1	1	1	1	100	1	100	1	1	100	1	100	1	1	1	1	1	1	100	1	100	1	1	1	1	100	1	100	1	1
FIFTH	Staphylococcaceae	24069	578	18453	17595	73.1023	364	62.9758	17849	17104	71.0624	363	62.8028	37	0.00207295	37	0.00207295	17563	16885	70.1525	361	62.4567	30	29	17184	16543	68.7316	354	61.2457	25	24
SIXTH	Aliicoccus	1	1	0	0	0	0	0	0	0	0	0	0	0	NA	0	NA	0	0	0	0	0	0	0	0	0	0	0	0	0	0
SIXTH	Jeotgalicoccus	18	12	0	0	0	0	0	0	0	0	0	0	0	NA	0	NA	0	0	0	0	0	0	0	0	0	0	0	0	0	0
SEVENTH	unclassified_Jeotgalicoccus	4	4	0	0	0	0	0	0	0	0	0	0	0	NA	0	NA	0	0	0	0	0	0	0	0	0	0	0	0	0	0
SIXTH	Macrococcoides	94	4	19	19	20.2128	3	75	19	19	20.2128	3	75	1	0.0526316	1	0.0526316	19	19	20.2128	3	75	1	1	19	19	20.2128	3	75	1	1
SIXTH	Macrococcus	26	12	1	1	3.84615	1	8.33333	1	1	3.84615	1	8.33333	1	1	1	1	1	1	3.84615	1	8.33333	1	1	1	1	3.84615	1	8.33333	1	1
SEVENTH	unclassified_Macrococcus	4	4	0	0	0	0	0	0	0	0	0	0	0	NA	0	NA	0	0	0	0	0	0	0	0	0	0	0	0	0	0
SIXTH	Mammaliicoccus	452	72	319	301	66.5929	45	62.5	310	293	64.823	45	62.5	7	0.0225806	7	0.0225806	307	290	64.1593	45	62.5	5	5	307	290	64.1593	45	62.5	5	5
SEVENTH	unclassified_Mammaliicoccus	67	67	49	41	61.194	41	61.194	49	41	61.194	41	61.194	3	0.0612245	3	0.0612245	49	41	61.194	41	61.194	3	3	49	41	61.194	41	61.194	3	3
SIXTH	Nosocomiicoccus	11	5	0	0	0	0	0	0	0	0	0	0	0	NA	0	NA	0	0	0	0	0	0	0	0	0	0	0	0	0	0
SEVENTH	unclassified_Nosocomiicoccus	3	3	0	0	0	0	0	0	0	0	0	0	0	NA	0	NA	0	0	0	0	0	0	0	0	0	0	0	0	0	0
SIXTH	Salinicoccus	29	15	2	2	6.89655	1	6.66667	2	2	6.89655	1	6.66667	1	0.5	1	0.5	2	2	6.89655	1	6.66667	1	1	2	2	6.89655	1	6.66667	1	1
SEVENTH	unclassified_Salinicoccus	4	4	0	0	0	0	0	0	0	0	0	0	0	NA	0	NA	0	0	0	0	0	0	0	0	0	0	0	0	0	0
SIXTH	Staphylococcus	23438	457	18112	17272	73.6923	314	68.709	17517	16789	71.6315	313	68.4902	31	0.00176971	31	0.00176971	17234	16573	70.71	311	68.0525	26	25	16855	16231	69.2508	304	66.5208	21	20
SEVENTH	environmental_samples	2	1	1	1	50	1	100	1	1	50	1	100	1	1	1	1	1	1	50	1	100	1	1	1	1	50	1	100	1	1
SEVENTH	Staphylococcus_cohnii_species_complex	92	8	99	92	100	8	100	90	84	91.3043	8	100	3	0.0333333	3	0.0333333	89	83	90.2174	7	87.5	2	2	89	83	90.2174	7	87.5	2	2
EIGHTH	unclassified_Staphylococcus_cohnii_species_complex	6	6	6	6	100	6	100	6	6	100	6	100	2	0.333333	2	0.333333	5	5	83.3333	5	83.3333	1	1	5	5	83.3333	5	83.3333	1	1
SEVENTH	unclassified_Staphylococcus	400	385	306	268	67	263	68.3117	305	267	66.75	262	68.0519	12	0.0393443	12	0.0393443	303	265	66.25	261	67.7922	10	10	290	259	64.75	255	66.2338	10	10
FIFTH	Thermoactinomycetaceae	68	53	15	15	22.0588	13	24.5283	13	13	19.1176	11	20.7547	5	0.384615	5	0.384615	13	13	19.1176	11	20.7547	5	5	13	13	19.1176	11	20.7547	5	5
SIXTH	Baia	1	1	1	1	100	1	100	1	1	100	1	100	1	1	1	1	1	1	100	1	100	1	1	1	1	100	1	100	1	1
SIXTH	Croceifilum	1	1	1	1	100	1	100	1	1	100	1	100	1	1	1	1	1	1	100	1	100	1	1	1	1	100	1	100	1	1
SIXTH	Desmospora	2	2	0	0	0	0	0	0	0	0	0	0	0	NA	0	NA	0	0	0	0	0	0	0	0	0	0	0	0	0	0
SIXTH	Hazenella	1	1	1	1	100	1	100	1	1	100	1	100	1	1	1	1	1	1	100	1	100	1	1	1	1	100	1	100	1	1
SIXTH	Kroppenstedtia	4	3	3	3	75	2	66.6667	3	3	75	2	66.6667	1	0.333333	1	0.333333	3	3	75	2	66.6667	1	1	3	3	75	2	66.6667	1	1
SIXTH	Laceyella	5	3	0	0	0	0	0	0	0	0	0	0	0	NA	0	NA	0	0	0	0	0	0	0	0	0	0	0	0	0	0
SIXTH	Lihuaxuella	1	1	0	0	0	0	0	0	0	0	0	0	0	NA	0	NA	0	0	0	0	0	0	0	0	0	0	0	0	0	0
SIXTH	Marininema	2	2	1	1	50	1	50	1	1	50	1	50	1	1	1	1	1	1	50	1	50	1	1	1	1	50	1	50	1	1
SIXTH	Marinithermofilum	1	1	1	1	100	1	100	1	1	100	1	100	1	1	1	1	1	1	100	1	100	1	1	1	1	100	1	100	1	1
SIXTH	Mechercharimyces	1	1	0	0	0	0	0	0	0	0	0	0	0	NA	0	NA	0	0	0	0	0	0	0	0	0	0	0	0	0	0
SEVENTH	unclassified_Mechercharimyces	1	1	0	0	0	0	0	0	0	0	0	0	0	NA	0	NA	0	0	0	0	0	0	0	0	0	0	0	0	0	0
SIXTH	Melghirimyces	3	3	0	0	0	0	0	0	0	0	0	0	0	NA	0	NA	0	0	0	0	0	0	0	0	0	0	0	0	0	0
SIXTH	Novibacillus	1	1	1	1	100	1	100	0	0	0	0	0	0	NA	0	NA	0	0	0	0	0	0	0	0	0	0	0	0	0	0
SIXTH	Paenactinomyces	2	1	2	2	100	1	100	2	2	100	1	100	1	0.5	1	0.5	2	2	100	1	100	1	1	2	2	100	1	100	1	1
SIXTH	Paludifilum	1	1	1	1	100	1	100	1	1	100	1	100	1	1	1	1	1	1	100	1	100	1	1	1	1	100	1	100	1	1
SIXTH	Planifilum	2	2	0	0	0	0	0	0	0	0	0	0	0	NA	0	NA	0	0	0	0	0	0	0	0	0	0	0	0	0	0
SIXTH	Polycladomyces	3	3	0	0	0	0	0	0	0	0	0	0	0	NA	0	NA	0	0	0	0	0	0	0	0	0	0	0	0	0	0
SIXTH	Polycladospora	2	1	0	0	0	0	0	0	0	0	0	0	0	NA	0	NA	0	0	0	0	0	0	0	0	0	0	0	0	0	0
SIXTH	Risungbinella	2	1	0	0	0	0	0	0	0	0	0	0	0	NA	0	NA	0	0	0	0	0	0	0	0	0	0	0	0	0	0
SIXTH	Seinonella	1	1	0	0	0	0	0	0	0	0	0	0	0	NA	0	NA	0	0	0	0	0	0	0	0	0	0	0	0	0	0
SIXTH	Shimazuella	3	3	0	0	0	0	0	0	0	0	0	0	0	NA	0	NA	0	0	0	0	0	0	0	0	0	0	0	0	0	0
SIXTH	Staphylospora	1	1	0	0	0	0	0	0	0	0	0	0	0	NA	0	NA	0	0	0	0	0	0	0	0	0	0	0	0	0	0
SIXTH	Thermoactinomyces	26	17	3	3	11.5385	3	17.6471	2	2	7.69231	2	11.7647	2	1	2	1	2	2	7.69231	2	11.7647	2	2	2	2	7.69231	2	11.7647	2	2
SEVENTH	unclassified_Thermoactinomyces	13	13	2	2	15.3846	2	15.3846	1	1	7.69231	1	7.69231	1	1	1	1	1	1	7.69231	1	7.69231	1	1	1	1	7.69231	1	7.69231	1	1
SIXTH	Thermoflavimicrobium	2	2	0	0	0	0	0	0	0	0	0	0	0	NA	0	NA	0	0	0	0	0	0	0	0	0	0	0	0	0	0
FORTH	Lactobacillales	40519	1744	214	210	0.518275	34	1.94954	202	199	0.491128	30	1.72018	19	0.0940594	19	0.0940594	192	189	0.466448	27	1.54817	15	15	183	181	0.446704	25	1.43349	10	10
FIFTH	Aerococcaceae	306	59	0	0	0	0	0	0	0	0	0	0	0	NA	0	NA	0	0	0	0	0	0	0	0	0	0	0	0	0	0
SIXTH	Abiotrophia	35	4	0	0	0	0	0	0	0	0	0	0	0	NA	0	NA	0	0	0	0	0	0	0	0	0	0	0	0	0	0
SEVENTH	environmental_samples	11	1	0	0	0	0	0	0	0	0	0	0	0	NA	0	NA	0	0	0	0	0	0	0	0	0	0	0	0	0	0
SEVENTH	unclassified_Abiotrophia	5	2	0	0	0	0	0	0	0	0	0	0	0	NA	0	NA	0	0	0	0	0	0	0	0	0	0	0	0	0	0
SIXTH	Aerococcus	224	32	0	0	0	0	0	0	0	0	0	0	0	NA	0	NA	0	0	0	0	0	0	0	0	0	0	0	0	0	0
SEVENTH	Aerococcus_incertae_sedis	11	2	0	0	0	0	0	0	0	0	0	0	0	NA	0	NA	0	0	0	0	0	0	0	0	0	0	0	0	0	0
SEVENTH	unclassified_Aerococcus	19	18	0	0	0	0	0	0	0	0	0	0	0	NA	0	NA	0	0	0	0	0	0	0	0	0	0	0	0	0	0
SIXTH	Dolosicoccus	3	1	0	0	0	0	0	0	0	0	0	0	0	NA	0	NA	0	0	0	0	0	0	0	0	0	0	0	0	0	0
SIXTH	Eremococcus	2	1	0	0	0	0	0	0	0	0	0	0	0	NA	0	NA	0	0	0	0	0	0	0	0	0	0	0	0	0	0
SIXTH	Facklamia	16	8	0	0	0	0	0	0	0	0	0	0	0	NA	0	NA	0	0	0	0	0	0	0	0	0	0	0	0	0	0
SEVENTH	unclassified_Facklamia	4	4	0	0	0	0	0	0	0	0	0	0	0	NA	0	NA	0	0	0	0	0	0	0	0	0	0	0	0	0	0
SIXTH	Falseniella	2	1	0	0	0	0	0	0	0	0	0	0	0	NA	0	NA	0	0	0	0	0	0	0	0	0	0	0	0	0	0
SIXTH	Fundicoccus	4	2	0	0	0	0	0	0	0	0	0	0	0	NA	0	NA	0	0	0	0	0	0	0	0	0	0	0	0	0	0
SIXTH	Globicatella	9	4	0	0	0	0	0	0	0	0	0	0	0	NA	0	NA	0	0	0	0	0	0	0	0	0	0	0	0	0	0
SEVENTH	unclassified_Globicatella	2	2	0	0	0	0	0	0	0	0	0	0	0	NA	0	NA	0	0	0	0	0	0	0	0	0	0	0	0	0	0
SIXTH	Hutsoniella	1	1	0	0	0	0	0	0	0	0	0	0	0	NA	0	NA	0	0	0	0	0	0	0	0	0	0	0	0	0	0
SIXTH	Ignavigranum	4	1	0	0	0	0	0	0	0	0	0	0	0	NA	0	NA	0	0	0	0	0	0	0	0	0	0	0	0	0	0
SIXTH	Ruoffia	4	2	0	0	0	0	0	0	0	0	0	0	0	NA	0	NA	0	0	0	0	0	0	0	0	0	0	0	0	0	0
SIXTH	Suicoccus	1	1	0	0	0	0	0	0	0	0	0	0	0	NA	0	NA	0	0	0	0	0	0	0	0	0	0	0	0	0	0
SIXTH	Vaginisenegalia	1	1	0	0	0	0	0	0	0	0	0	0	0	NA	0	NA	0	0	0	0	0	0	0	0	0	0	0	0	0	0
FIFTH	Carnobacteriaceae	360	93	109	109	30.2778	4	4.30108	108	108	30	4	4.30108	3	0.0277778	3	0.0277778	107	107	29.7222	4	4.30108	2	2	106	106	29.4444	4	4.30108	2	2
SIXTH	Alkalibacterium	16	13	0	0	0	0	0	0	0	0	0	0	0	NA	0	NA	0	0	0	0	0	0	0	0	0	0	0	0	0	0
SEVENTH	unclassified_Alkalibacterium	4	4	0	0	0	0	0	0	0	0	0	0	0	NA	0	NA	0	0	0	0	0	0	0	0	0	0	0	0	0	0
SIXTH	Allofustis	1	1	0	0	0	0	0	0	0	0	0	0	0	NA	0	NA	0	0	0	0	0	0	0	0	0	0	0	0	0	0
SIXTH	Alloiococcus	4	1	0	0	0	0	0	0	0	0	0	0	0	NA	0	NA	0	0	0	0	0	0	0	0	0	0	0	0	0	0
SIXTH	Atopobacter	2	2	0	0	0	0	0	0	0	0	0	0	0	NA	0	NA	0	0	0	0	0	0	0	0	0	0	0	0	0	0
SEVENTH	unclassified_Atopobacter	1	1	0	0	0	0	0	0	0	0	0	0	0	NA	0	NA	0	0	0	0	0	0	0	0	0	0	0	0	0	0
SIXTH	Atopococcus	2	1	0	0	0	0	0	0	0	0	0	0	0	NA	0	NA	0	0	0	0	0	0	0	0	0	0	0	0	0	0
SIXTH	Atopostipes	1	1	0	0	0	0	0	0	0	0	0	0	0	NA	0	NA	0	0	0	0	0	0	0	0	0	0	0	0	0	0
SIXTH	Carnobacterium	153	24	109	109	71.2418	4	16.6667	108	108	70.5882	4	16.6667	3	0.0277778	3	0.0277778	107	107	69.9346	4	16.6667	2	2	106	106	69.281	4	16.6667	2	2
SEVENTH	unclassified_Carnobacterium	35	13	16	16	45.7143	2	15.3846	16	16	45.7143	2	15.3846	3	0.1875	3	0.1875	15	15	42.8571	2	15.3846	2	2	15	15	42.8571	2	15.3846	2	2
SIXTH	Desemzia	7	3	0	0	0	0	0	0	0	0	0	0	0	NA	0	NA	0	0	0	0	0	0	0	0	0	0	0	0	0	0
SEVENTH	unclassified_Desemzia	2	2	0	0	0	0	0	0	0	0	0	0	0	NA	0	NA	0	0	0	0	0	0	0	0	0	0	0	0	0	0
SIXTH	Dolosigranulum	36	2	0	0	0	0	0	0	0	0	0	0	0	NA	0	NA	0	0	0	0	0	0	0	0	0	0	0	0	0	0
SIXTH	Granulicatella	45	17	0	0	0	0	0	0	0	0	0	0	0	NA	0	NA	0	0	0	0	0	0	0	0	0	0	0	0	0	0
SEVENTH	environmental_samples	17	1	0	0	0	0	0	0	0	0	0	0	0	NA	0	NA	0	0	0	0	0	0	0	0	0	0	0	0	0	0
SEVENTH	unclassified_Granulicatella	12	12	0	0	0	0	0	0	0	0	0	0	0	NA	0	NA	0	0	0	0	0	0	0	0	0	0	0	0	0	0
SIXTH	Isobaculum	1	1	0	0	0	0	0	0	0	0	0	0	0	NA	0	NA	0	0	0	0	0	0	0	0	0	0	0	0	0	0
SIXTH	Jeotgalibaca	48	7	0	0	0	0	0	0	0	0	0	0	0	NA	0	NA	0	0	0	0	0	0	0	0	0	0	0	0	0	0
SEVENTH	unclassified_Jeotgalibaca	2	2	0	0	0	0	0	0	0	0	0	0	0	NA	0	NA	0	0	0	0	0	0	0	0	0	0	0	0	0	0
SIXTH	Lacticigenium	1	1	0	0	0	0	0	0	0	0	0	0	0	NA	0	NA	0	0	0	0	0	0	0	0	0	0	0	0	0	0
SIXTH	Marinilactibacillus	13	6	0	0	0	0	0	0	0	0	0	0	0	NA	0	NA	0	0	0	0	0	0	0	0	0	0	0	0	0	0
SEVENTH	unclassified_Marinilactibacillus	3	3	0	0	0	0	0	0	0	0	0	0	0	NA	0	NA	0	0	0	0	0	0	0	0	0	0	0	0	0	0
SIXTH	Pisciglobus	1	1	0	0	0	0	0	0	0	0	0	0	0	NA	0	NA	0	0	0	0	0	0	0	0	0	0	0	0	0	0
SIXTH	Trichococcus	29	12	0	0	0	0	0	0	0	0	0	0	0	NA	0	NA	0	0	0	0	0	0	0	0	0	0	0	0	0	0
SEVENTH	environmental_samples	6	1	0	0	0	0	0	0	0	0	0	0	0	NA	0	NA	0	0	0	0	0	0	0	0	0	0	0	0	0	0
SEVENTH	unclassified_Trichococcus	2	2	0	0	0	0	0	0	0	0	0	0	0	NA	0	NA	0	0	0	0	0	0	0	0	0	0	0	0	0	0
FIFTH	Enterococcaceae	10099	429	40	39	0.386177	7	1.6317	37	36	0.356471	7	1.6317	7	0.189189	8	0.216216	32	31	0.306961	6	1.3986	4	4	31	30	0.297059	6	1.3986	3	3
SIXTH	Bavariicoccus	1	1	0	0	0	0	0	0	0	0	0	0	0	NA	0	NA	0	0	0	0	0	0	0	0	0	0	0	0	0	0
SIXTH	Catellicoccus	1	1	0	0	0	0	0	0	0	0	0	0	0	NA	0	NA	0	0	0	0	0	0	0	0	0	0	0	0	0	0
SIXTH	Enterococcus	9858	389	40	39	0.395618	7	1.79949	37	36	0.365186	7	1.79949	7	0.189189	8	0.216216	32	31	0.314465	6	1.54242	4	4	31	30	0.304321	6	1.54242	3	3
SEVENTH	environmental_samples	19	1	0	0	0	0	0	0	0	0	0	0	0	NA	0	NA	0	0	0	0	0	0	0	0	0	0	0	0	0	0
SEVENTH	unclassified_Enterococcus	361	323	2	2	0.554017	2	0.619195	2	2	0.554017	2	0.619195	2	1	2	1	2	2	0.554017	2	0.619195	2	2	2	2	0.554017	2	0.619195	2	2
SIXTH	Melissococcus	27	2	0	0	0	0	0	0	0	0	0	0	0	NA	0	NA	0	0	0	0	0	0	0	0	0	0	0	0	0	0
SEVENTH	unclassified_Melissococcus	1	1	0	0	0	0	0	0	0	0	0	0	0	NA	0	NA	0	0	0	0	0	0	0	0	0	0	0	0	0	0
SIXTH	Pilibacter	1	1	0	0	0	0	0	0	0	0	0	0	0	NA	0	NA	0	0	0	0	0	0	0	0	0	0	0	0	0	0
SIXTH	Tetragenococcus	102	5	0	0	0	0	0	0	0	0	0	0	0	NA	0	NA	0	0	0	0	0	0	0	0	0	0	0	0	0	0
SIXTH	Vagococcus	109	30	0	0	0	0	0	0	0	0	0	0	0	NA	0	NA	0	0	0	0	0	0	0	0	0	0	0	0	0	0
SEVENTH	environmental_samples	2	1	0	0	0	0	0	0	0	0	0	0	0	NA	0	NA	0	0	0	0	0	0	0	0	0	0	0	0	0	0
SEVENTH	unclassified_Vagococcus	12	5	0	0	0	0	0	0	0	0	0	0	0	NA	0	NA	0	0	0	0	0	0	0	0	0	0	0	0	0	0
FIFTH	Lactobacillaceae	8563	577	16	16	0.18685	11	1.90641	13	13	0.151816	9	1.55979	4	0.307692	4	0.307692	12	12	0.140138	8	1.38648	3	3	10	10	0.116782	7	1.21317	2	2
SIXTH	Acetilactobacillus	1	1	0	0	0	0	0	0	0	0	0	0	0	NA	0	NA	0	0	0	0	0	0	0	0	0	0	0	0	0	0
SIXTH	Agrilactobacillus	4	3	0	0	0	0	0	0	0	0	0	0	0	NA	0	NA	0	0	0	0	0	0	0	0	0	0	0	0	0	0
SIXTH	Amylolactobacillus	5	2	0	0	0	0	0	0	0	0	0	0	0	NA	0	NA	0	0	0	0	0	0	0	0	0	0	0	0	0	0
SIXTH	Apilactobacillus	93	14	0	0	0	0	0	0	0	0	0	0	0	NA	0	NA	0	0	0	0	0	0	0	0	0	0	0	0	0	0
[truncated: 6,372 more rows]
